# Supplementary material for: Identifying Candidate Genes for Type 2 Diabetes Mellitus and Obesity through Gene Expression Profiling in Multiple Tissues or Cells
Source: J Diabetes Res. 2013 Dec 26;2013:970435. doi: 10.1155/2013/970435 (PMC3888709; doi:10.1155/2013/970435)
Supplement: Supplementary file 1 — Supplementary Table S1 Samples of each dataset studied in present study. Note; some datasets might be divided into two or more groups depending on sample phenotype. Supplementary Table S2 All genes ranked by differential expression percentage. Supplementary Table S3 Details about SNPs susceptibility to T2DM. Supplementary Table S4 Details about SNPs susceptibility to obesity. Supplementary Table S5 Ranked genes located within ± 1Mb of SNPs susceptibility to T2DM or obesity. Supplementary Table S6 Comparison of p-values before and after adjusting by FDR. Supplementary Table S7 Up- and down- expression of candidate genes in T2DM- and obesity-control study. [file 970435.f1.xls]

## Sheet: Samples_of_T2DM
GDS3715(G1)	case(15) vs control(20)	GDS3715(G2)	case(15) vs control(20)	GDS3681		GSE25462(G1)	case(10) vs control(15)	GSE25462(G2)	case(10) vs control(25)	GSE19420(G1)	case(10) vs control(12)	GSE19420(G2)	case(8) vs control(12)	GSE19420(G3)	case(10) vs control(12)	GSE19420(G4)	case(8) vs control(12)	GSE18732(G1)	case(20) vs control(20)	GSE18732(G2)	case(20) vs control(20)	GSE15932	case(8) vs control(8)	GSE13760	case(10) vs control(11)	GSE9006	case(12) vs control(24)	GSE25724	case(6) vs control(7)	GSE15773(G1)	case(5) vs control(5)	GSE15773(G2)	case(5) vs control(5)	GSE26637(G1)	case(5) vs control(5)	GSE26637(G2)	case(5) vs control(5)	GSE15653	case(5) vs control(5)	GSE23343	case(10) vs control(7)
GSM555317	Run7.aUa.010110d.SkMDbt1132D.CEL-DB basal	GSM555317	Run7.aUa.010110d.SkMDbt1132D.CEL-DB basal	GSM317322	type 2 diabetes subject 01	GSM624961	Muscle-Diabetes-1	GSM624961	Muscle-Diabetes-1	GSM482936	CA07_T2DM_T0	GSM482937	CA07_T2DM_T52	GSM482936	CA07_T2DM_T0	GSM482937	CA07_T2DM_T52	GSM465278	muscle_diabetic_15498	GSM465278	muscle_diabetic_15498	GSM399694	Patient B1: patient with diabetes mellitus	GSM346560	IM12_case	GSM228667	PBMCs-Type 2 Diabetes-T2D_1_New	GSM631762	Type 2 diabetic islets, rep1	GSM395774	Insulin resistant patient 1 - subcutaneous adipose tissue	GSM395783	Insulin resistant patient 1 - omental adipose tissue	GSM655603	Fasting Insulin Resistant 1	GSM655613	Hyperinsulinemic Insulin Resistant 1	GSM391702	Liver_Obese_DM_well-controlled_rep1	GSM572807	Liver_hyperglycima_no.1
GSM555319	Run3.aUa.010110d.SkMDbt1134D.CEL-DB basal	GSM555319	Run3.aUa.010110d.SkMDbt1134D.CEL-DB basal	GSM317323	type 2 diabetes subject 02	GSM624962	Muscle-Diabetes-2	GSM624962	Muscle-Diabetes-2	GSM482940	EI03_T2DM_T0	GSM482941	EI03_T2DM_T52	GSM482940	EI03_T2DM_T0	GSM482941	EI03_T2DM_T52	GSM465280	muscle_diabetic_15504	GSM465280	muscle_diabetic_15504	GSM399697	Patient B2: patient with diabetes mellitus	GSM346563	IM14_case	GSM228668	PBMCs-Type 2 Diabetes-T2D_10_New	GSM631763	Type 2 diabetic islets, rep2	GSM395775	Insulin resistant patient 3 - subcutaneous adipose tissue	GSM395784	Insulin resistant patient 2 - omental adipose tissue	GSM655604	Fasting Insulin Resistant 14	GSM655614	Hyperinsulinemic Insulin Resistant 14	GSM391703	Liver_Obese_DM_well-controlled_rep2	GSM572808	Liver_hyperglycima_no.2
GSM555321	Run3.aUa.010110d.SkMDbt1136D.CEL-DB basal	GSM555321	Run3.aUa.010110d.SkMDbt1136D.CEL-DB basal	GSM317324	type 2 diabetes subject 03	GSM624963	Muscle-Diabetes-3	GSM624963	Muscle-Diabetes-3	GSM482942	EN04_T2DM_T0	GSM482943	EN04_T2DM_T52	GSM482942	EN04_T2DM_T0	GSM482943	EN04_T2DM_T52	GSM465281	muscle_diabetic_15510	GSM465281	muscle_diabetic_15510	GSM399699	Patient B3: patient with diabetes mellitus	GSM346565	IM16_case	GSM228669	PBMCs-Type 2 Diabetes-T2D_13_New	GSM631764	Type 2 diabetic islets, rep3	GSM395776	Insulin resistant patient 4 - subcutaneous adipose tissue	GSM395785	Insulin resistant patient 3 - omental adipose tissue	GSM655605	Fasting Insulin Resistant 20	GSM655615	Hyperinsulinemic Insulin Resistant 20	GSM391704	Liver_Obese_DM_well-controlled_rep3	GSM572809	Liver_hyperglycima_no.3
GSM555323	Run3.aUa.010110d.SkMDbt1138D.CEL-DB basal	GSM555323	Run3.aUa.010110d.SkMDbt1138D.CEL-DB basal	GSM317325	type 2 diabetes subject 04	GSM624964	Muscle-Diabetes-4	GSM624964	Muscle-Diabetes-4	GSM482946	GO11_T2DM-T0	GSM482950	HE08_T2DM_T52	GSM482946	GO11_T2DM-T0	GSM482950	HE08_T2DM_T52	GSM465282	muscle_diabetic_15516	GSM465282	muscle_diabetic_15516	GSM399704	Patient B4: patient with diabetes mellitus	GSM346572	IM27_case	GSM228670	PBMCs-Type 2 Diabetes-T2D_2_New	GSM631765	Type 2 diabetic islets, rep4	GSM395777	Insulin resistant patient 5 - subcutaneous adipose tissue	GSM395786	Insulin resistant patient 4 - omental adipose tissue	GSM655606	Fasting Insulin Resistant 21	GSM655616	Hyperinsulinemic Insulin Resistant 21	GSM391705	Liver_Obese_DM_well-controlled_rep4	GSM572810	Liver_hyperglycima_no.4
GSM555325	Run3.aUa.010110d.SkMDbt1140D.CEL-DB basal	GSM555325	Run3.aUa.010110d.SkMDbt1140D.CEL-DB basal	GSM317326	type 2 diabetes subject 05	GSM624965	Muscle-Diabetes-5	GSM624965	Muscle-Diabetes-5	GSM482949	HE08_T2DM_T0	GSM482952	HO02_T2DM_T52	GSM482949	HE08_T2DM_T0	GSM482952	HO02_T2DM_T52	GSM465286	muscle_diabetic_15549	GSM465286	muscle_diabetic_15549	GSM399705	Patient B6-2: patient with diabetes mellitus	GSM346579	IM63_case	GSM228671	PBMCs-Type 2 Diabetes-T2D_3_New	GSM631766	Type 2 diabetic islets, rep5	GSM395778	Insulin sensitive patient 1 - subcutaneous adipose tissue	GSM395787	Insulin resistant patient 5 - omental adipose tissue	GSM655607	Fasting Insulin Resistant 9	GSM655617	Hyperinsulinemic Insulin Resistant 9	GSM391706	Liver_Obese_DM_well-controlled_rep5	GSM572811	Liver_hyperglycima_no.5
GSM555327	Run4.aUa.010110d.SkMDbt1142D.CEL-DB basal	GSM555327	Run4.aUa.010110d.SkMDbt1142D.CEL-DB basal	GSM317327	type 2 diabetes subject 06	GSM624966	Muscle-Diabetes-6	GSM624966	Muscle-Diabetes-6	GSM482951	HO02_T2DM_T0	GSM482956	KR10_T2DM_T52	GSM482951	HO02_T2DM_T0	GSM482956	KR10_T2DM_T52	GSM465290	muscle_diabetic_15570	GSM465290	muscle_diabetic_15570	GSM399706	Patient B7: patient with diabetes mellitus	GSM346582	IM67_case	GSM228672	PBMCs-Type 2 Diabetes-T2D_4_New	GSM631767	Type 2 diabetic islets, rep6	GSM395779	Insulin sensitive patient 2 - subcutaneous adipose tissue	GSM395788	Insulin sensitive patient 1 - omental adipose tissue	GSM655608	Fasting Insulin Sensitive 13	GSM655618	Hyperinsulinemic Insulin Sensitive 13	GSM391693	Liver_Lean_rep1	GSM572812	Liver_hyperglycima_no.6
GSM555329	Run4.aUa.010110d.SkMDbt1144D.CEL-DB basal	GSM555329	Run4.aUa.010110d.SkMDbt1144D.CEL-DB basal	GSM317328	type 2 diabetes subject 07	GSM624967	Muscle-Diabetes-7	GSM624967	Muscle-Diabetes-7	GSM482954	KA06_T2DM_T0	GSM482965	SL01_T2DM_T52	GSM482954	KA06_T2DM_T0	GSM482965	SL01_T2DM_T52	GSM465291	muscle_diabetic_15576	GSM465291	muscle_diabetic_15576	GSM399707	Patient B8: patient with diabetes mellitus	GSM346586	IM71_case	GSM228673	PBMCs-Type 2 Diabetes-T2D_5_New	GSM631755	Non-diabetic islets, rep1	GSM395780	Insulin sensitive patient 3 - subcutaneous adipose tissue	GSM395789	Insulin sensitive patient 2 - omental adipose tissue	GSM655609	Fasting Insulin Sensitive 3	GSM655619	Hyperinsulinemic Insulin Sensitive 3	GSM391694	Liver_Lean_rep2	GSM572813	Liver_hyperglycima_no.7
GSM555331	Run4.aUa.010110d.SkMDbt1146D.CEL-DB basal	GSM555331	Run4.aUa.010110d.SkMDbt1146D.CEL-DB basal	GSM317329	type 2 diabetes subject 08	GSM624968	Muscle-Diabetes-8	GSM624968	Muscle-Diabetes-8	GSM482955	KR10_T2DM_T0	GSM482973	VH05_T2DM_T52	GSM482955	KR10_T2DM_T0	GSM482973	VH05_T2DM_T52	GSM465293	muscle_diabetic_15588	GSM465293	muscle_diabetic_15588	GSM399708	Patient B10: patient with diabetes mellitus	GSM346587	IM122_case	GSM228674	PBMCs-Type 2 Diabetes-T2D_6_New	GSM631756	Non-diabetic islets, rep2	GSM395781	Insulin sensitive patient 4 - subcutaneous adipose tissue	GSM395790	Insulin sensitive patient 3 - omental adipose tissue	GSM655610	Fasting Insulin Sensitive 4	GSM655620	Hyperinsulinemic Insulin Sensitive 4	GSM391695	Liver_Lean_rep3	GSM572814	Liver_hyperglycima_no.8
GSM555333	Run4.aUa.010110d.SkMDbt1148D.CEL-DB basal	GSM555333	Run4.aUa.010110d.SkMDbt1148D.CEL-DB basal	GSM317330	type 2 diabetes subject 09	GSM624969	Muscle-Diabetes-9	GSM624969	Muscle-Diabetes-9	GSM482964	SL01_T2DM_T0	GSM482933	BA26_IGT	GSM482964	SL01_T2DM_T0	GSM482934	BE16_NGT	GSM465296	muscle_diabetic_15622	GSM465296	muscle_diabetic_15622	GSM399717	Patient D2: healthy control	GSM346588	Lima1A_case	GSM228675	PBMCs-Type 2 Diabetes-T2D_7_New	GSM631757	Non-diabetic islets, rep3	GSM395782	Insulin sensitive patient 5 - subcutaneous adipose tissue	GSM395791	Insulin sensitive patient 4 - omental adipose tissue	GSM655611	Fasting Insulin Sensitive 5	GSM655621	Hyperinsulinemic Insulin Sensitive 5	GSM391696	Liver_Lean_rep4	GSM572815	Liver_hyperglycima_no.9
GSM555335	Run4.aUa.010110d.SkMDbt1150D.CEL-DB basal	GSM555335	Run4.aUa.010110d.SkMDbt1150D.CEL-DB basal	GSM317331	type 2 diabetes subject 10	GSM624970	Muscle-Diabetes-10	GSM624970	Muscle-Diabetes-10	GSM482972	VH05_T2DM_T0	GSM482935	BL21_IGT	GSM482972	VH05_T2DM_T0	GSM482938	DE25_NGT	GSM465298	muscle_diabetic_15628	GSM465298	muscle_diabetic_15628	GSM399718	Patient D3: healthy control	GSM346589	IM19_case	GSM228676	PBMCs-Type 2 Diabetes-T2D_8_New	GSM631758	Non-diabetic islets, rep4			GSM395792	Insulin sensitive patient 5 - omental adipose tissue	GSM655612	Fasting Insulin Sensitive 7	GSM655622	Hyperinsulinemic Insulin Sensitive 7	GSM391697	Liver_Lean_rep5	GSM572816	Liver_hyperglycima_no.10
GSM555337	Run5.aUa.010110d.SkMDbt1152D.CEL-DB basal	GSM555337	Run5.aUa.010110d.SkMDbt1152D.CEL-DB basal	GSM317332	Cont subject 01	GSM624925	Muscle-FamilyHistoryNegative-1	GSM624938	Muscle-FamilyHistoryPositive-1	GSM482933	BA26_IGT	GSM482939	DO15_IGT	GSM482934	BE16_NGT	GSM482945	GL33_NGT	GSM465300	muscle_diabetic_15640	GSM465300	muscle_diabetic_15640	GSM399719	Patient D4: healthy control	GSM346561	IM13_control	GSM228677	PBMCs-Type 2 Diabetes-T2D11_T2D	GSM631759	Non-diabetic islets, rep5											GSM572800	Liver_normoglycima_no.1
GSM555339	Run5.aUa.010110d.SkMDbt1154D.CEL-DB basal	GSM555339	Run5.aUa.010110d.SkMDbt1154D.CEL-DB basal	GSM317333	Cont subject 02	GSM624926	Muscle-FamilyHistoryNegative-2	GSM624939	Muscle-FamilyHistoryPositive-2	GSM482935	BL21_IGT	GSM482944	GA01_IGT	GSM482938	DE25_NGT	GSM482947	GO32_NGT	GSM465301	muscle_diabetic_15646	GSM465301	muscle_diabetic_15646	GSM399761	Patient 6: healthy control	GSM346566	IM17_control	GSM228678	PBMCs-Type 2 Diabetes-T2D9_T2D	GSM631760	Non-diabetic islets, rep6											GSM572801	Liver_normoglycima_no.2
GSM555341	Run5.aUa.010110d.SkmDbt1959D.CEL-DB basal	GSM555341	Run5.aUa.010110d.SkmDbt1959D.CEL-DB basal	GSM317334	Cont subject 03	GSM624927	Muscle-FamilyHistoryNegative-3	GSM624940	Muscle-FamilyHistoryPositive-3	GSM482939	DO15_IGT	GSM482953	HO07_IGT	GSM482945	GL33_NGT	GSM482948	GR31_NGT	GSM465304	muscle_diabetic_15661	GSM465304	muscle_diabetic_15661	GSM399762	Patient 7: healthy control	GSM346568	IM18_control	GSM228562	PBMCs-Healthy-H122_Healthy	GSM631761	Non-diabetic islets, rep7											GSM572802	Liver_normoglycima_no.3
GSM555343	Run5.aUa.010110d.SkmDbt1961D.CEL-DB basal	GSM555343	Run5.aUa.010110d.SkmDbt1961D.CEL-DB basal	GSM317335	Cont subject 04	GSM624928	Muscle-FamilyHistoryNegative-4	GSM624941	Muscle-FamilyHistoryPositive-4	GSM482944	GA01_IGT	GSM482959	NI24_IGT	GSM482947	GO32_NGT	GSM482957	ME11_NGT	GSM465305	muscle_diabetic_15667	GSM465305	muscle_diabetic_15667	GSM399763	Patient 8: healthy control	GSM346570	IM24_control	GSM228563	PBMCs-Healthy-H124_Healthy													GSM572803	Liver_normoglycima_no.4
GSM555345	Run5.aUa.010110d.SkmDbt2447D.CEL-DB basal	GSM555345	Run5.aUa.010110d.SkmDbt2447D.CEL-DB basal	GSM317336	Cont subject 05	GSM624929	Muscle-FamilyHistoryNegative-5	GSM624942	Muscle-FamilyHistoryPositive-5	GSM482953	HO07_IGT	GSM482962	OP10_IGT	GSM482948	GR31_NGT	GSM482958	MR23_NGT	GSM465307	muscle_diabetic_15676	GSM465307	muscle_diabetic_15676	GSM399765	Patient 9: healthy control	GSM346573	IM28_control	GSM228564	PBMCs-Healthy-H125_Healthy													GSM572804	Liver_normoglycima_no.5
GSM555237	a10a.000606jd.2.SkMNor907.CEL-IS basal	GSM555277	Run7.aUa.001206d.SkMInR1092D.CEL-IR basal	GSM317337	Cont subject 06	GSM624930	Muscle-FamilyHistoryNegative-6	GSM624943	Muscle-FamilyHistoryPositive-6	GSM482959	NI24_IGT	GSM482963	PO14_IGT	GSM482957	ME11_NGT	GSM482960	NW30_NGT	GSM465311	muscle_diabetic_16101	GSM465311	muscle_diabetic_16101	GSM399766	Patient 10: healthy control	GSM346575	IM29_control	GSM228565	PBMCs-Healthy-H126_Healthy													GSM572805	Liver_normoglycima_no.6
GSM555239	a10a.000606jd.2.SkMNor911.CEL-IS basal	GSM555279	Run2.aUa.001206d.SkMInR1094D.CEL-IR basal	GSM317338	Cont subject 07	GSM624931	Muscle-FamilyHistoryNegative-7	GSM624944	Muscle-FamilyHistoryPositive-7	GSM482962	OP10_IGT	GSM482966	SL22_IGT	GSM482958	MR23_NGT	GSM482961	ON04_NGT	GSM465312	muscle_diabetic_16107	GSM465312	muscle_diabetic_16107			GSM346576	IM32_control	GSM228566	PBMCs-Healthy-H133_Healthy													GSM572806	Liver_normoglycima_no.7
GSM555241	Run1.a10a.000607jd.2.SkMNor915.CEL-IS basal	GSM555281	Run2.aUa.001206d.SkMInR1096D.CEL-IR basal	GSM317339	Cont subject 08	GSM624932	Muscle-FamilyHistoryNegative-8	GSM624945	Muscle-FamilyHistoryPositive-8	GSM482963	PO14_IGT	GSM482967	SW17_IGT	GSM482960	NW30_NGT	GSM482968	TI05_NGT	GSM465314	muscle_diabetic_16122	GSM465314	muscle_diabetic_16122			GSM346578	IM46_control	GSM228567	PBMCs-Healthy-H148_Healthy
GSM555243	Run1.a10a.000607jd.2.SkMNor917.CEL-IS basal	GSM555283	Run2.aUa.001206d.SkMInR1098D.CEL-IR basal	GSM317340	Cont subject 09	GSM624933	Muscle-FamilyHistoryNegative-9	GSM624946	Muscle-FamilyHistoryPositive-9	GSM482966	SL22_IGT	GSM482969	TM18_IGT	GSM482961	ON04_NGT	GSM482970	VB09_NGT	GSM465317	muscle_diabetic_16164	GSM465317	muscle_diabetic_16164			GSM346581	IM66_control	GSM228568	PBMCs-Healthy-H149_Healthy
GSM555245	Run1.a10a.000607jd.2.SkMNor919.CEL-IS basal	GSM555285	Run2.aUa.001206d.SkMInR1100D.CEL-IR basal	GSM317341	Cont subject 10	GSM624934	Muscle-FamilyHistoryNegative-10	GSM624947	Muscle-FamilyHistoryPositive-10	GSM482967	SW17_IGT	GSM482971	VE02_IGT	GSM482968	TI05_NGT	GSM482974	VI29_NGT	GSM465318	muscle_diabetic_16173	GSM465318	muscle_diabetic_16173			GSM346584	IM69_control	GSM228569	PBMCs-Healthy-H150_Healthy
GSM555247	Run1.a10a.000607jd.2.SkMNor921.CEL-IS basal	GSM555287	Run7.aUa.010110d.SkMInR1102D.CEL-IR basal			GSM624935	Muscle-FamilyHistoryNegative-11	GSM624948	Muscle-FamilyHistoryPositive-11	GSM482969	TM18_IGT			GSM482970	VB09_NGT			GSM465275	muscle_normal_15494	GSM465274	muscle_glucoseIntolerant_15493			GSM346585	IM70_control	GSM228570	PBMCs-Healthy-H152_Healthy
GSM555249	Run1.a10a.000608jd.2.SkMNor923.CEL-IS basal	GSM555289	Run2.aUa.001206d.SkMInR1104D.CEL-IR basal			GSM624936	Muscle-FamilyHistoryNegative-12	GSM624949	Muscle-FamilyHistoryPositive-12	GSM482971	VE02_IGT			GSM482974	VI29_NGT			GSM465277	muscle_normal_15497	GSM465276	muscle_glucoseIntolerant_15496					GSM228571	PBMCs-Healthy-H166_Healthy
GSM555251	Run1.a10a.000608jd.2.SkMNor925.CEL-IS basal	GSM555291	Run2.aUa.001206d.SkMInR1106D.CEL-IR basal			GSM624937	Muscle-FamilyHistoryNegative-13	GSM624950	Muscle-FamilyHistoryPositive-13									GSM465279	muscle_normal_15501	GSM465283	muscle_glucoseIntolerant_15522					GSM228572	PBMCs-Healthy-H171_Healthy
GSM555253	Run1.a10a.000609jd.2.SkMNor909.CEL-IS basal	GSM555293	Run7.aUa.010110d.SkMInR1108D.CEL-IR basal			GSM624971	Muscle-FamilyHistoryNegative-14	GSM624951	Muscle-FamilyHistoryPositive-14									GSM465284	muscle_normal_15534	GSM465285	muscle_glucoseIntolerant_15537					GSM228573	PBMCs-Healthy-H176_Healthy
GSM555255	Run1.a10a.000609jd.2.SkMNor913.CEL-IS basal	GSM555295	Run5.aUa.010110d.SkMInR1110D.CEL-IR basal			GSM624973	Muscle-FamilyHistoryNegative-15	GSM624952	Muscle-FamilyHistoryPositive-15									GSM465289	muscle_normal_15564	GSM465287	muscle_glucoseIntolerant_15552					GSM228574	PBMCs-Healthy-H178_Healthy
GSM555257	Run7.aUa.001206d.SkMInS1072D.CEL-IS basal	GSM555297	Run5.aUa.010110d.SkMInR1112D.CEL-IR basal					GSM624953	Muscle-FamilyHistoryPositive-16									GSM465292	muscle_normal_15582	GSM465288	muscle_glucoseIntolerant_15558					GSM228575	PBMCs-Healthy-H28_Healthy
GSM555259	Run8.aUa.010615d.SkMInS1074D.CEL-IS basal	GSM555299	Run5.aUa.010110d.SkMInR1114D.CEL-IR basal					GSM624954	Muscle-FamilyHistoryPositive-17									GSM465294	muscle_normal_15594	GSM465299	muscle_glucoseIntolerant_15637					GSM228576	PBMCs-Healthy-H37_Healthy
GSM555261	Run8.aUa.010615d.SkMInS1076D.CEL-IS basal	GSM555301	Run5.aUa.010110d.SkMInR1116D.CEL-IR basal					GSM624955	Muscle-FamilyHistoryPositive-18									GSM465295	muscle_normal_15619	GSM465306	muscle_glucoseIntolerant_15670					GSM228577	PBMCs-Healthy-H42_Healthy
GSM555263	Run8.aUa.010615d.SkMInS1078D.CEL-IS basal	GSM555303	Run5.aUa.010110d.SkMInR1118D.CEL-IR basal					GSM624956	Muscle-FamilyHistoryPositive-19									GSM465297	muscle_normal_15625	GSM465308	muscle_glucoseIntolerant_15682					GSM228578	PBMCs-Healthy-H48_Healthy
GSM555265	Run8.aUa.010615d.SkMInS1080D.CEL-IS basal	GSM555305	Run5.aUa.010110d.SkMInR1120D.CEL-IR basal					GSM624957	Muscle-FamilyHistoryPositive-20									GSM465302	muscle_normal_15652	GSM465315	muscle_glucoseIntolerant_16140					GSM228579	PBMCs-Healthy-H98_Healthy
GSM555267	Run8.aUa.010615d.SkMInS1082D.CEL-IS basal	GSM555307	Run6.aUa.010110d.SkMInR1122D.CEL-IR basal					GSM624958	Muscle-FamilyHistoryPositive-21									GSM465303	muscle_normal_15655	GSM465321	muscle_glucoseIntolerant_16197					GSM228580	PBMCs-Healthy-HIDDM2_Healthy
GSM555269	Run8.aUa.010615d.SkMInS1084D.CEL-IS basal	GSM555309	Run6.aUa.010110d.SkMInR1124D.CEL-IR basal					GSM624959	Muscle-FamilyHistoryPositive-22									GSM465309	muscle_normal_15685	GSM465327	muscle_glucoseIntolerant_16437					GSM228581	PBMCs-Healthy-HIDDM4_Healthy
GSM555271	Run8.aUa.010615d.SkMInS1086D.CEL-IS basal	GSM555311	Run6.aUa.010110d.SkMInR1126D.CEL-IR basal					GSM624960	Muscle-FamilyHistoryPositive-23									GSM465310	muscle_normal_15697	GSM465328	muscle_glucoseIntolerant_16443					GSM228663	PBMCs-Healthy-INF301_Healthy
GSM555273	Run2.aUa.001206d.SkMInS1088D.CEL-IS basal	GSM555313	Run6.aUa.010110d.SkMInR1128D.CEL-IR basal					GSM624972	Muscle-FamilyHistoryPositive-24									GSM465313	muscle_normal_16116	GSM465338	muscle_glucoseIntolerant_16610					GSM228664	PBMCs-Healthy-INF408_Healthy
GSM555275	Run2.aUa.001206d.SkMInS1090D.CEL-IS basal	GSM555315	Run6.aUa.010110d.SkMInR1130D.CEL-IR basal					GSM624974	Muscle-FamilyHistoryPositive-25									GSM465316	muscle_normal_16149	GSM465340	muscle_glucoseIntolerant_16616					GSM228665	PBMCs-Healthy-INF447_Healthy
																		GSM465319	muscle_normal_16188	GSM465344	muscle_glucoseIntolerant_16640					GSM228666	PBMCs-Healthy-INF448_Healthy
																		GSM465320	muscle_normal_16191	GSM465358	muscle_glucoseIntolerant_16728
																		GSM465323	muscle_normal_16410	GSM465360	muscle_glucoseIntolerant_16734
																		GSM465329	muscle_normal_16446	GSM465367	muscle_glucoseIntolerant_16780
																		GSM465332	muscle_normal_16467	GSM465375	muscle_glucoseIntolerant_17013

## Sheet: Samples_of_obesity
GDS3688[ACCN]	case(5) vs control(6)	GSE474(G1)	case(8) vs control(8)	GSE474(G2)	case(8) vs control(8)	GSE15653	case(4) vs control(5)	GSE10946	case(5) vs control(6)	GSE28005	case(6) vs control(6)	GSE18897(G1)	case(10) vs control(20)	GSE18897(G2)	case(10) vs control(20)	GSE29718(G1)	case(9) vs control(4)	GSE29718(G2)	case(5) vs control(4)	GSE29718(G3)	case(3) vs control(2)	GSE2508(G1)	case(10) vs control(10)	GSE2508(G2)	case(9) vs control(10)	GSE25401	case(30) vs control(26)
GSM243225	Adipose tissue_418_obese_rep1	GSM3979	PGA-HMO-MObese-1aUA-s2	GSM3995	PGA-HMO-Obese-1aUA-s2	GSM391698	Liver_Obese_noDM_rep1	GSM277438	cumulus_nonPCOS_Obese_rep1	GSM692703	adipose tissue from subject#5 at day 0, biological replicate 3	GSM468320	DietSensitive _1 day_subject3	GSM468350	DietResistant _1 day_subject1	GSM737023	subcutaneous fat_female_obese_rep1	GSM737025	subcutaneous fat_male_obese_rep1	GSM737030	visceral fat_female_obese_rep1	GSM47317	Obese F 01 subA	GSM47329	Obese M 01 subA	GSM623767	WAT_Obese [126]
GSM243226	Adipose tissue_419_obese_rep2	GSM3980	PGA-HMO-MObese-2aUA-s2a	GSM3996	PGA-HMO-Obese-2aUA-s2	GSM391699	Liver_Obese_noDM_rep2	GSM277439	cumulus_nonPCOS_Obese_rep2	GSM692706	adipose tissue from subject#6 at day 0, biological replicate 4	GSM468321	DietSensitive _1 day_subject1	GSM468351	DietResistant _1 day_subject4	GSM737024	subcutaneous fat_female_obese_rep2	GSM737026	subcutaneous fat_male_obese_rep2	GSM737031	visceral fat_female_obese_rep2	GSM47319	Obese F 02 subA	GSM47330	Obese M 02 subA	GSM623764	WAT_Obese [48]
GSM243227	Adipose tissue_420_obese_rep3	GSM3981	PGA-HMO-MObese-3aUA-s2	GSM3997	PGA-HMO-Obese-3aUA-s2	GSM391700	Liver_Obese_noDM_rep3	GSM277440	cumulus_nonPCOS_Obese_rep3	GSM692709	adipose tissue from subject#7 at day 0, biological replicate 5	GSM468322	DietSensitive _1 day_subject2	GSM468352	DietResistant _1 day_subject6	GSM737025	subcutaneous fat_male_obese_rep1	GSM737027	subcutaneous fat_male_obese_rep3	GSM737032	visceral fat_male_obese_rep1	GSM47321	Obese F 03 subA	GSM47331	Obese M 03 subA	GSM623777	WAT_Obese [795]
GSM243228	Adipose tissue_421_obese_rep4	GSM3982	PGA-HMO-MObese-4aUA-s2	GSM3998	PGA-HMO-Obese-4bUA-s2	GSM391701	Liver_Obese_noDM_rep4	GSM277441	cumulus_nonPCOS_Obese_rep4	GSM692712	adipose tissue from subject#8 at day 0, biological replicate 6	GSM468323	DietSensitive _1 day_subject4	GSM468353	DietResistant _1 day_subject3	GSM737026	subcutaneous fat_male_obese_rep2	GSM737028	subcutaneous fat_male_obese_rep4	GSM737021	visceral fat_female_lean_rep1	GSM47322	Obese F 04 subA	GSM47332	Obese M 04 subA	GSM623779	WAT_Obese [1116]
GSM243275	Adipose tissue_422_obese_rep5	GSM3983	PGA-HMO-MObese-5aUA-s2	GSM3999	PGA-HMO-Obese-5aUA-s2	GSM391693	Liver_Lean_rep1	GSM277442	cumulus_nonPCOS_Obese_rep5	GSM692715	adipose tissue from subject#9 at day 0, biological replicate 7	GSM468324	DietSensitive _1 day_subject5	GSM468354	DietResistant _1 day_subject5	GSM737027	subcutaneous fat_male_obese_rep3	GSM737029	subcutaneous fat_male_obese_rep5	GSM737022	visceral fat_male_lean_rep1	GSM47323	Obese F 05 subA	GSM47333	Obese M 05 subAv2	GSM623780	WAT_Obese [1529]
GSM243215	Adipose tissue_423_control_rep1	GSM3984	PGA-HMO-MObese-6aUA-s2	GSM4000	PGA-HMO-Obese-6aUA-s2	GSM391694	Liver_Lean_rep2	GSM277443	cumulus_nonPCOS_Lean_rep1	GSM692721	adipose tissue from subject#12 at day 0, biological replicate 9	GSM468325	DietSensitive _1 day_subject6	GSM468355	DietResistant _1 day_subject2	GSM737028	subcutaneous fat_male_obese_rep4	GSM737017	subcutaneous fat_male_lean_rep1			GSM47324	Obese F 06 subAv2	GSM47334	Obese M 06 subAv2	GSM623783	WAT_Obese [1914]
GSM243216	Adipose tissue_425_control_rep2	GSM3985	PGA-HMO-MObese-7aUA-s2	GSM4001	PGA-HMO-Obese-7aUA-s2	GSM391695	Liver_Lean_rep3	GSM277444	cumulus_nonPCOS_Lean_rep2	GSM692697	adipose tissue from subject#1 at day 0, biological replicate 1	GSM468326	DietSensitive _1 day_subject10	GSM468356	DietResistant _1 day_subject9	GSM737029	subcutaneous fat_male_obese_rep5	GSM737018	subcutaneous fat_male_lean_rep2			GSM47325	Obese F 07 subAv2	GSM47335	Obese M 07 subAv2	GSM623784	WAT_Obese [2343]
GSM243217	Adipose tissue_426_control_rep3	GSM3986	PGA-HMO-MObese-8aUA-s2	GSM4002	PGA-HMO-Obese-8aUA-s2	GSM391696	Liver_Lean_rep4	GSM277445	cumulus_nonPCOS_Lean_rep3	GSM692700	adipose tissue from subject#3 at day 0, biological replicate 2	GSM468327	DietSensitive _1 day_subject7	GSM468357	DietResistant _1 day_subject8	GSM737030	visceral fat_female_obese_rep1	GSM737019	subcutaneous fat_male_lean_rep3			GSM47326	Obese F 08 subAv2	GSM47336	Obese M 08 subAv2	GSM623785	WAT_Obese [2636]
GSM243218	Adipose tissue_427_control_rep4	GSM3987	PGA-HMO-NonObese-1aUA-s2	GSM3987	PGA-HMO-NonObese-1aUA-s2	GSM391697	Liver_Lean_rep5	GSM277446	cumulus_nonPCOS_Lean_rep4	GSM692718	adipose tissue from subject#11 at day 0, biological replicate 8	GSM468328	DietSensitive _1 day_subject8	GSM468358	DietResistant _1 day_subject7	GSM737031	visceral fat_female_obese_rep2	GSM737020	subcutaneous fat_male_lean_rep4			GSM47327	Obese F 09 subAv2	GSM47337	Obese M 09 subAv2	GSM623787	WAT_Obese [3651]
GSM243219	Adipose tissue_428_control_rep5	GSM3988	PGA-HMO-NonObese-2aUA-s2	GSM3988	PGA-HMO-NonObese-2aUA-s2			GSM277447	cumulus_nonPCOS_Lean_rep5	GSM692724	adipose tissue from subject#15 at day 0, biological replicate 10	GSM468329	DietSensitive _1 day_subject9	GSM468359	DietResistant _1 day_subject10	GSM737013	subcutaneous fat_female_lean_rep1					GSM47328	Obese F 10 subAv2	GSM47357	Lean M 01 subB	GSM623788	WAT_Obese [3655]
GSM243220	Adipose tissue_429_control_rep6	GSM3989	PGA-HMO-NonObese-3aUA-s2	GSM3989	PGA-HMO-NonObese-3aUA-s2			GSM277448	cumulus_nonPCOS_Lean_rep6	GSM692729	adipose tissue from subject#17 at day 0, biological replicate 12	GSM468380	Lean_1 day_subject5	GSM468380	Lean_1 day_subject5	GSM737014	subcutaneous fat_female_lean_rep2					GSM47224	Lean F 01 subA	GSM47358	Lean M 02 subB	GSM623790	WAT_Obese [3698]
		GSM3990	PGA-HMO-NonObese-4aUA-s2	GSM3990	PGA-HMO-NonObese-4aUA-s2					GSM692732	adipose tissue from subject#18 at day 0, biological replicate 13	GSM468381	Lean_1 day_subject1	GSM468381	Lean_1 day_subject1	GSM737015	subcutaneous fat_female_lean_rep3					GSM47225	Lean F 02 subA	GSM47359	Lean M 03 subB	GSM623791	WAT_Obese [3708]
		GSM3991	PGA-HMO-NonObese-5aUA-s2	GSM3991	PGA-HMO-NonObese-5aUA-s2							GSM468382	Lean_1 day_subject3	GSM468382	Lean_1 day_subject3	GSM737016	subcutaneous fat_female_lean_rep4					GSM47226	Lean F 03 subA	GSM47360	Lean M 04 subB	GSM623793	WAT_Obese [3725]
		GSM3992	PGA-HMO-NonObese-6aUA-s2	GSM3992	PGA-HMO-NonObese-6aUA-s2							GSM468383	Lean_1 day_subject4	GSM468383	Lean_1 day_subject4							GSM47227	Lean F 04 subA	GSM47361	Lean M 05 subB	GSM623794	WAT_Obese [3731]
		GSM3993	PGA-HMO-NonObese-7aUA-s2	GSM3993	PGA-HMO-NonObese-7aUA-s2							GSM468384	Lean_1 day_subject2	GSM468384	Lean_1 day_subject2							GSM47228	Lean F 05 subA	GSM47362	Lean M 06 subB	GSM623795	WAT_Obese [3825]
		GSM3994	PGA-HMO-NonObese-8aUA-s2	GSM3994	PGA-HMO-NonObese-8aUA-s2							GSM468385	Lean_1 day_subject6	GSM468385	Lean_1 day_subject6							GSM47229	Lean F 06 subAv2	GSM47363	Lean M 07 subB	GSM623799	WAT_Obese [4264]
												GSM468386	Lean_1 day_subject7	GSM468386	Lean_1 day_subject7							GSM47230	Lean F 07 subAv2	GSM47364	Lean M 08 subB	GSM623800	WAT_Obese [4275]
												GSM468387	Lean_1 day_subject8	GSM468387	Lean_1 day_subject8							GSM47231	Lean F 08 subAv2	GSM47365	Lean M 09 subB	GSM623801	WAT_Obese [4281]
												GSM468388	Lean_1 day_subject10	GSM468388	Lean_1 day_subject10							GSM47232	Lean F 09 subAv2	GSM47366	Lean M 10 subB	GSM623802	WAT_Obese [4595]
												GSM468389	Lean_1 day_subject9	GSM468389	Lean_1 day_subject9							GSM47233	Lean F 10 subAv2			GSM623804	WAT_Obese [4615]
												GSM468390	Lean_1 day_subject14	GSM468390	Lean_1 day_subject14											GSM623805	WAT_Obese [4625]
												GSM468391	Lean_1 day_subject13	GSM468391	Lean_1 day_subject13											GSM623807	WAT_Obese [4639]
												GSM468392	Lean_1 day_subject11	GSM468392	Lean_1 day_subject11											GSM623808	WAT_Obese [4640]
												GSM468393	Lean_1 day_subject16	GSM468393	Lean_1 day_subject16											GSM623809	WAT_Obese [4642]
												GSM468394	Lean_1 day_subject12	GSM468394	Lean_1 day_subject12											GSM623810	WAT_Obese [4645]
												GSM468395	Lean_1 day_subject15	GSM468395	Lean_1 day_subject15											GSM623811	WAT_Obese [4648]
												GSM468396	Lean_1 day_subject19	GSM468396	Lean_1 day_subject19											GSM623812	WAT_Obese [4649]
												GSM468397	Lean_1 day_subject17	GSM468397	Lean_1 day_subject17											GSM623813	WAT_Obese [4659]
												GSM468398	Lean_1 day_subject20	GSM468398	Lean_1 day_subject20											GSM623814	WAT_Obese [4810]
												GSM468399	Lean_1 day_subject18	GSM468399	Lean_1 day_subject18											GSM623815	WAT_Obese [4872]
																										GSM623778	WAT_Nonobese [828]
																										GSM623781	WAT_Nonobese [1732]
																										GSM623782	WAT_Nonobese [1892]
																										GSM623786	WAT_Nonobese [3604]
																										GSM623796	WAT_Nonobese [3988]
																										GSM623797	WAT_Nonobese [4082]
																										GSM623798	WAT_Nonobese [4203]
																										GSM623803	WAT_Nonobese [4613]
																										GSM623806	WAT_Nonobese [4635]
																										GSM623816	WAT_Nonobese [4873]
																										GSM623789	WAT_Nonobese [3664]
																										GSM623792	WAT_Nonobese [3712]
																										GSM623761	WAT_Nonobese [13]
																										GSM623762	WAT_Nonobese [24]
																										GSM623763	WAT_Nonobese [43]
																										GSM623765	WAT_Nonobese [83]
																										GSM623766	WAT_Nonobese [101]
																										GSM623768	WAT_Nonobese [134]
																										GSM623769	WAT_Nonobese [136]
																										GSM623770	WAT_Nonobese [199]
																										GSM623771	WAT_Nonobese [202]
																										GSM623772	WAT_Nonobese [398]
																										GSM623773	WAT_Nonobese [399]
																										GSM623774	WAT_Nonobese [404]
																										GSM623775	WAT_Nonobese [467]
																										GSM623776	WAT_Nonobese [469]
Note:G;group.
