# Supplementary material for: Identifying Candidate Genes for Type 2 Diabetes Mellitus and Obesity through Gene Expression Profiling in Multiple Tissues or Cells
Source: J Diabetes Res. 2013 Dec 26;2013:970435. doi: 10.1155/2013/970435 (PMC3888709; doi:10.1155/2013/970435)
Supplement: Supplementary file 2 [file 970435.f2.xls]

## Sheet: all_ranked_genes_of_T2DM
GSE/GDS		GDS3681	GDS3715(1)	GDS3715(2)	GSE18732(1)	GSE18732(2)	GSE19420(1)	GSE19420(2)	GSE19420(3)	GSE19420(4)	GSE25462(1)	GSE25462(2)	GSE25724	GSE15773(1)	GSE15773(2)	GSE26637(1)	GSE26637(2)	GSE15653	GSE23343	GSE9006	GSE13760	GSE15932	P<0.05	Total	percentages	Tissues of genes with top highly differencial expression among datasets
Group		Group1	Group2	Group3	Group4	Group5	Group6	Group7	Group8	Group9	Group10	Group11	Group12	Group13	Group14	Group15	Group16	Group17	Group18	Group19	Group20	Group21
GPL		HG_U95Av2	HG_U95A	HG_U95A	HG-U133_Plus_2	HG-U133_Plus_2	HG-U133_Plus_2	HG-U133_Plus_2	HG-U133_Plus_2	HG-U133_Plus_2	HG-U133_Plus_2	HG-U133_Plus_2	HG-U133A	HG-U133_Plus_2	HG-U133_Plus_2	HG-U133_Plus_2	HG-U133_Plus_2	HG-U133A	HG-U133_Plus_2	HG-U133A	HG-U133A_2	HG-U133_Plus_2
tissue		myotube	skeletal muscle	skeletal muscle	skeletal muscle	skeletal muscle	skeletal muscle	skeletal muscle	skeletal muscle	skeletal muscle	skeletal muscle	skeletal muscle	islets	omental adipose tissue	subcutaneou adipose tissue	Adipose tissue	Adipose tissue	liver	liver	blood	arterial tissue	blood
gene	Affymetrix probe-ID
LYN	210754_s_at				0.0118182	0.414794	0.00440343	0.00153087	0.0323678	0.021204	0.0432253	0.102736	0.0308968	0.0616139	0.909692	0.0333857	0.0169914	0.218265	0.045409	0.0622443	0.386576	0.0459893	11	18	0.611111	skeletal muscle,islets,adipose tissue,liver,blood
DENND1B	219696_at				0.908576	0.358278	0.00094604	0.0393458	0.18615	0.551182	0.128984	0.0230525	0.0129327	0.640987	0.553969	0.095344	0.0456702	0.961546	0.0377777	0.0419186	0.0282795	0.00355447	9	18	0.5	skeletal muscle,islets,Adipose tissue,liver,blood,arterial tissue
MRPL30	243887_at				0.137897	0.945579	0.00242569	0.0693391	0.0420688	0.269447	0.00326274	0.00727981		0.149153	0.0208804	0.834511	0.183605		0.0235657			0.0072856	7	14	0.5	skeletal muscle,subcutaneou adipose tissue,liver,blood
POC1B	226283_at				0.113271	0.569822	0.989651	0.911293	0.0259135	0.0292528	0.007692	0.0201726		0.39123	0.101305	0.463446	0.0418733		0.008954			0.00796272	7	14	0.5	skeletal muscle,Adipose tissue,liver,blood
PRKCB	209685_s_at				0.0384209	0.0130235	0.00749519	0.0226373	0.350134	0.17859	0.560165	0.278635	0.00956217	0.341135	0.65734	0.0482384	0.00231767	0.772213	0.00247336	0.0140938	0.932206	0.17495	9	18	0.5	skeletal muscle,islets,Adipose tissues,liver,blood
RP4-655J12.3	244606_at				0.0283817	0.409263	0.0062713	0.218091	0.0130024	0.215849	0.0417299	0.0959885		0.0560974	0.395228	0.816647	0.0489194		0.00728102			0.0244385	7	14	0.5	skeletal muscle，adipose tissue，liver,blood
CAPZB	37012_at	0.135558	0.0077135	0.029138	0.976923	0.707443	0.0352034	0.0179057	0.0612566	0.0486595	0.0825145	0.0205302	0.973609	0.3868	0.462916	0.0351053	0.0301121	0.124684	0.0413851	0.0328282	0.904766	0.079153	10	21	0.47619
DBF4	204244_s_at				0.566109	0.278428	0.0113904	0.0490099	0.363645	0.359571	0.0154667	0.0160285	0.00964893	0.938184	0.116693	0.334474	0.080647	0.257955	0.0179221	0.061163	0.0354145	0.045076	8	18	0.444444
EDN1	218995_s_at				0.0453052	0.0593989	0.526294	0.0473873	0.551925	0.019416	0.0160361	0.04866	0.167554	0.689376	0.433839	0.532117	0.0415797	0.649673	0.199684	0.00355337	0.0129941	0.406867	8	18	0.444444
EFHD2	217992_s_at				0.458508	0.507988	0.0168003	0.00344415	0.306196	0.0721265	0.0312118	0.00932062	0.646969	0.0101013	0.837868	0.130557	0.0361884	0.231311	0.422419	0.000204325	0.384552	9.11e-05	8	18	0.444444
FAM175B	212837_at				0.286356	0.322339	0.0429223	0.00755034	0.455942	0.495347	0.411323	0.307678	0.0247576	0.39828	0.408408	0.521088	0.0147316	0.403034	0.0450264	0.00196159	0.0467091	0.000311187	8	18	0.444444
PWP1	201607_at				0.952171	0.232047	0.03318	0.0148326	0.0599873	0.0334869	0.324003	0.0796869	0.00388691	0.578405	0.27842	0.47115	0.037361	0.234862	0.0944293	0.000457593	0.0413314	0.00618338	8	18	0.444444
QSER1	219705_at				0.926685	0.0457645	0.00835388	0.324002	0.0342152	0.0221879	0.985146	0.150993	0.0501851	0.506409	0.000993613	0.508801	0.0185346	0.67556	0.806926	0.0225119	0.031596	0.2181	8	18	0.444444
RAB31	217763_s_at				0.797341	0.896098	0.0259858	0.0340078	0.00601546	0.00945961	0.217101	0.308779	0.848282	0.214271	0.0256999	0.00103863	0.0182064	0.0959134	0.0858763	0.0804862	0.556736	0.00385836	8	18	0.444444
SLC30A1	212907_at				0.186157	0.606189	0.00589217	0.0480703	0.458309	0.511111	0.00379075	0.00367194	0.00209847	0.799577	0.200519	0.162973	0.0128115	0.481701	0.0424816	0.322454	0.838625	0.0055632	8	18	0.444444
STAB1	204150_at				0.946883	0.705975	0.00628698	0.0384297	0.018646	0.150422	0.0014622	0.00309157	0.595911	0.846768	0.560965	0.0297047	0.0192058	0.546109	0.19695	0.533103	0.0727877	0.0278743	8	18	0.444444
TTC33	219421_at				0.882123	0.505182	0.88333	0.254585	0.398601	0.630296	0.0254752	0.0468876	0.0050426	0.309123	0.120633	0.275631	0.0338576	0.203826	0.00949293	0.00172224	0.0143472	0.0179049	8	18	0.444444
CDK6	224848_at				0.813892	0.717961	0.0535651	0.146759	0.0161594	0.0380329	0.0620031	0.0462708		0.0310507	0.41248	0.0678317	0.000646843		0.6444			0.0193988	6	14	0.428571
COTL1	224583_at				0.422022	0.670211	0.0856945	0.0173839	0.29492	0.0859755	0.0444622	0.0324407		0.0554053	0.467687	0.0103153	0.00415343		0.394807			0.00663991	6	14	0.428571
CXCL16	223454_at				0.457788	0.560758	0.0144228	0.0475598	0.055582	0.291693	0.0752731	0.0424753		0.556976	0.952621	0.0465225	0.013709		0.128234			0.036262	6	14	0.428571
DAB2	240873_x_at				0.0157559	0.0259093	0.814087	0.500027	0.427154	0.715362	0.0262282	0.00272708		0.320739	0.287106	0.000932302	0.000797718		0.656883			0.84354	6	14	0.428571
ETS1	224833_at				0.6908	0.720937	0.0378025	0.00434392	0.0334196	0.0063477	0.547839	0.199212		0.224498	0.654433	0.929753	0.499603		0.0142532			0.024979	6	14	0.428571
FAM120C	229512_at				0.725881	0.609414	0.0213339	0.152896	0.00651453	0.0405936	0.12143	0.0228068		0.129346	0.925662	0.0260878	0.0597954		0.987202			0.0211375	6	14	0.428571
FAM214A	225327_at				0.869935	0.109457	0.0198114	0.0113412	0.549729	0.319042	0.000722537	0.0414603		0.439671	0.947092	0.813951	0.00249518		0.755376			0.0498198	6	14	0.428571
FAM92A1	228011_at				0.12889	0.516401	0.0039917	0.381881	0.526155	0.598008	0.0766208	0.0119403		0.683527	0.0451913	0.0194405	0.0202359		0.0195962			0.872842	6	14	0.428571
GAS2L3	238756_at				0.854204	0.482171	0.0969899	0.0230221	0.0382628	0.003853	0.315025	0.0356942		0.843998	0.0636145	0.0290372	0.00381769		0.121974			0.990031	6	14	0.428571
HIBADH	224812_at				0.000870215	0.900221	0.0483904	0.0391915	0.493221	0.868188	0.0430189	0.0151073		0.237143	0.411445	0.797598	0.912509		0.294891			0.0115463	6	14	0.428571
ITGB2	1555349_a_at				0.0149879	0.416085	0.428693	0.999217	0.276367	0.712346	0.0100339	0.0129266		0.676895	0.345159	0.000918913	0.0331684		0.48802			0.00199663	6	14	0.428571
LYRM7	228841_at				0.0328045	0.671899	0.0161638	0.812486	0.501823	0.424128	0.125225	0.0363895		0.716897	0.175841	0.9411	0.0392289		0.0308074			0.005657	6	14	0.428571
MRPS30	227600_at				0.728496	0.725881	0.000780903	0.014628	0.794001	0.932837	0.00631537	0.00787125		0.052237	0.304475	0.292977	0.949357		0.0337845			5.94e-05	6	14	0.428571
OSBPL6	223805_at				0.0150077	0.380319	0.0420254	0.0339591	0.173754	0.180047	0.0104077	0.0404661		0.363634	0.189836	0.750673	0.613902		0.0375728			0.638034	6	14	0.428571
RBMS3	242137_at				0.0351358	0.918184	0.333672	0.591522	0.0387265	0.0251625	0.00385216	0.0384255		0.351523	0.869542	0.238838	0.00921149		0.294738			0.546729	6	14	0.428571
RP11-745O10.4	223892_s_at				0.722731	0.303354	0.0132348	0.0134416	0.0449261	0.0239732	0.0112996	0.085198		0.428379	0.415853	0.507827	0.200031		0.0258184			0.801655	6	14	0.428571
SNORD118	224496_s_at				0.375561	0.00445502	0.121492	0.114493	0.00961945	0.0139319	0.561779	0.270949		0.969428	0.917477	0.0487119	0.0334295		0.0262534			0.811838	6	14	0.428571
TMBIM4	223892_s_at				0.722731	0.303354	0.0132348	0.0134416	0.0449261	0.0239732	0.0112996	0.085198		0.428379	0.415853	0.507827	0.200031		0.0258184			0.801655	6	14	0.428571
TMEM107	224496_s_at				0.375561	0.00445502	0.121492	0.114493	0.00961945	0.0139319	0.561779	0.270949		0.969428	0.917477	0.0487119	0.0334295		0.0262534			0.811838	6	14	0.428571
TMEM64	225974_at				0.73297	0.260227	0.0383942	0.0192608	0.690825	0.408246	0.84375	0.794681		0.430335	0.0179559	0.0495979	0.0674157		0.0222795			0.0238303	6	14	0.428571
ZNF302	228392_at				0.204465	0.0313849	0.00605859	0.0612638	0.00599054	0.104619	0.0324557	0.0192068		0.10797	0.0987741	0.127954	0.318583		0.188651			0.000294513	6	14	0.428571
ZNF627	224492_s_at				0.35657	0.455988	0.0337255	0.0248989	0.187636	0.05652	0.00644618	0.0133531		0.193466	0.321527	0.690725	0.00751875		0.360602			0.00908801	6	14	0.428571
ZNF791	227122_at				0.224751	0.369808	0.0047016	0.00388084	0.091247	0.0291811	0.00508131	0.005992		0.203763	0.27287	0.15522	0.494701		0.438305			0.0392643	6	14	0.428571
2012-09-02	200015_s_at				0.0195211	0.0224478	0.0874711	0.176039	0.0138836	0.0217468	0.457059	0.596261	0.0611891	0.921715	0.451846	0.262137	0.0162296	0.0211101		0.47404	0.159958	0.0325387	7	17	0.411765
ACACA	212186_at				0.0163833	0.17114	0.0114007	0.149609	0.631927	0.857711	0.0418911	0.0430254	0.370763	0.401268	0.0633184	0.495156	0.0401814	0.0475259	0.236633	0.00138722	0.627378	0.575016	7	18	0.388889
APBB2	212985_at				0.635941	0.709308	0.140541	0.00557759	0.806268	0.217069	0.0159119	0.00631259	0.025778	0.782755	0.519778	0.372601	0.0227211	0.0404298	0.132708	0.00309714	0.647457	0.631329	7	18	0.388889
API5	214960_at				0.48169	0.620642	0.248547	0.207124	0.136307	0.13281	0.0167791	0.0276637	0.0234553	0.0994997	0.110086	0.0127415	0.039494	0.723013	0.0162058	0.645263	0.725162	0.00134336	7	18	0.388889
ATR	209902_at				0.0399946	0.611712	0.751543	0.458982	0.414031	0.72249	0.0612023	0.355785	0.00454647	0.246047	0.0268163	0.00322448	0.000596786	0.276531	0.551869	0.0245788	0.561064	0.0202269	7	18	0.388889
C1orf38	207571_x_at				0.857705	0.0496649	0.543364	0.013391	0.37801	0.169357	0.0237516	0.0655769	0.250954	0.465484	0.828837	0.00227217	0.0377756	0.142725	0.143195	0.394167	0.0187071	0.028613	7	18	0.388889
CAPG	201850_at				0.699403	0.532762	0.0117307	0.112309	0.0439502	0.263298	0.0264924	0.0159037	0.467579	0.46489	0.758788	0.225345	0.000773376	0.0101364	0.89884	0.11203	0.994311	0.000410676	7	18	0.388889
CCND2	200953_s_at				0.846322	0.384279	0.015396	0.816858	0.0035641	0.275614	0.731327	0.355795	0.0268519	0.507339	0.828725	0.0114838	0.00947427	0.0749603	0.0490713	0.423728	0.190314	0.0380687	7	18	0.388889
CCR1	205098_at				0.409152	0.0166503	0.0691241	0.299234	0.511553	0.904045	0.0327495	0.00491217	0.837181	0.715083	0.239215	0.00398472	0.000579643	0.242964	0.0152216	8.24e-06	0.625769	0.200396	7	18	0.388889
CD14	201743_at				0.346507	0.0237419	0.0863575	0.797038	0.109777	0.600252	0.137154	0.0823248	0.0292529	0.631148	0.858129	0.000986316	0.0393696	0.0401467	0.13847	0.0397995	0.467623	0.000992143	7	18	0.388889
CD163	203645_s_at				0.4473	0.0265692	0.00737027	0.808774	0.0396483	0.900281	0.00151312	0.16977	0.307535	0.863189	0.719436	0.00866697	0.0014387	0.915077	0.0411844	0.471944	0.320658	0.728261	7	18	0.388889
CD82	203904_x_at				0.666768	0.231526	0.825729	0.0447475	0.513791	0.0224154	0.0287174	0.0455852	0.0281554	0.181116	0.390826	0.769016	0.89958	0.0683943	0.0882185	0.0756132	0.0332921	0.0253961	7	18	0.388889
CLCN3	201735_s_at				0.377403	0.305814	0.912253	0.0782943	0.918137	0.102197	0.0122556	0.0201036	0.0306662	0.395197	0.144771	0.22	0.0179926	0.0229212	0.0312947	0.0325857	0.155109	0.293113	7	18	0.388889
CYB5B	201634_s_at				0.042341	0.328578	0.716105	0.79231	0.656758	0.579539	0.023904	0.077446	0.0182588	0.808901	0.015788	0.267973	0.902516	0.872976	0.00261392	0.183332	0.0296942	0.0172772	7	18	0.388889
DDAH2	214909_s_at				0.715674	0.0944773	0.0391187	0.16141	0.0192332	0.194486	0.00410425	5.59e-05	0.0442418	0.0841097	0.195728	0.40831	0.0143456	0.180292	0.241886	0.421841	0.215503	0.00369324	7	18	0.388889
DOCK10	219279_at				0.525043	0.315326	0.992625	0.0257091	0.929499	0.00651144	0.586731	0.629485	0.0401543	0.711018	0.265823	0.156479	0.0198185	0.246847	0.0234257	0.267533	0.00617152	0.0242656	7	18	0.388889
DPP8	220939_s_at				0.00174475	0.0411209	0.104417	0.363279	0.203661	0.35279	0.887036	0.318916	0.00473793	0.874574	0.67314	0.0245838	0.0383836	0.00822241	0.317697	0.00675843	0.302587	0.314767	7	18	0.388889
EIF2S1	201144_s_at				0.821753	0.251725	0.0188647	0.0365324	0.550123	0.776021	0.0442185	0.125116	0.0285908	0.321233	0.658803	0.556721	0.936122	0.039006	0.0206288	0.064603	0.0939521	0.00201053	7	18	0.388889
ENPP4	204160_s_at				0.306684	0.155094	0.990897	0.578225	0.595759	0.29036	0.0291964	0.0422061	0.00133056	0.0763991	0.608175	0.662143	0.0118127	0.91025	0.0124011	0.231645	0.0258862	0.0307821	7	18	0.388889
ERGIC3	216032_s_at				0.492664	0.389386	0.00677175	0.226633	0.0519552	0.575588	0.0157678	0.0349811	0.0146139	0.802346	0.633919	0.560477	0.0444246	0.510747	0.592072	0.0974187	0.00605873	0.0199708	7	18	0.388889
FAIM	220643_s_at				0.0338382	0.267634	0.481351	0.827093	0.648167	0.165316	0.115933	0.0392541	0.0142598	0.914903	0.0815821	0.0367332	0.173504	0.333104	0.00115185	0.626164	0.0425809	0.0246599	7	18	0.388889
FAR2	220615_s_at				0.169186	0.0229015	0.892427	0.0651061	0.996885	0.0457305	0.295972	0.475467	0.0167337	0.525514	0.327866	0.000514687	0.0117427	0.0453831	0.596372	0.0274464	0.836215	0.404902	7	18	0.388889
FCGR2A	210992_x_at				0.822499	0.370383	0.0188404	0.850018	0.521173	0.807223	0.00425132	0.0223834	0.016121	0.914908	0.385962	0.0131499	0.00588646	0.0414688	0.0696404	0.164832	0.906806	0.146504	7	18	0.388889
FCGR2C	210992_x_at				0.822499	0.370383	0.0188404	0.850018	0.521173	0.807223	0.00425132	0.0223834	0.016121	0.914908	0.385962	0.0131499	0.00588646	0.0414688	0.0696404	0.164832	0.906806	0.146504	7	18	0.388889
GCA	203765_at				0.431365	0.0174815	0.0164399	0.00305223	0.0855108	0.0198166	0.779168	0.983163	0.00475123	0.956401	0.283681	0.218362	0.0271779	0.246324	0.00849455	0.379709	0.251561	0.846558	7	18	0.388889
GTF3C3	218343_s_at				0.92381	0.175317	0.0666864	0.0389755	0.175431	0.115688	0.0358743	0.0336231	0.000424366	0.0188342	0.253149	0.430282	0.152871	0.102066	0.373005	0.0444667	0.205197	0.016086	7	18	0.388889
HBA1	209458_x_at				0.527962	0.047481	0.163246	0.161956	0.0409458	0.0339893	0.00896112	0.0838017	0.035847	0.0943295	0.442067	0.355224	0.338154	0.0284858	0.228444	0.106253	0.118084	0.0158871	7	18	0.388889
HBA2	209458_x_at				0.527962	0.047481	0.163246	0.161956	0.0409458	0.0339893	0.00896112	0.0838017	0.035847	0.0943295	0.442067	0.355224	0.338154	0.0284858	0.228444	0.106253	0.118084	0.0158871	7	18	0.388889
HBB	211696_x_at				0.558509	0.129627	0.297855	0.0963456	0.0247572	0.00293761	0.00680279	0.36165	0.324562	0.0423304	0.121497	0.233101	0.331529	0.0295034	0.616077	0.0411689	0.145117	0.0142776	7	18	0.388889
HBP1	209102_s_at				0.283323	0.0266875	0.0804436	0.011014	0.119737	0.0337566	0.22349	0.291464	0.00852802	0.809889	0.693226	0.161842	0.0138007	0.0304826	0.788455	0.00323748	0.722545	0.513937	7	18	0.388889
HEG1	212822_at				0.0162212	0.268847	0.0283074	0.197967	0.00170848	0.00158019	0.33902	0.65887	0.479941	0.0789278	0.274002	0.908567	0.00953602	0.331445	0.0427617	0.0616011	0.0117841	0.531832	7	18	0.388889
IGF2	202409_at				0.942434	0.518956	0.212827	0.00550007	0.04795	0.000252144	0.0460357	0.0229334	0.050895	0.542947	0.326195	0.30465	0.301756	0.023551	0.102857	0.408206	0.0376307	0.196506	7	18	0.388889
KAT5	209192_x_at				0.104287	0.32992	0.010396	0.0457498	0.00724054	0.0312379	0.0963885	0.0191928	0.0184124	0.961205	0.634997	0.88992	0.0168702	0.317467	0.602353	0.966122	0.252233	0.07213	7	18	0.388889
KIAA0586	205631_at				0.0462072	0.548105	0.00669856	0.258348	0.0148491	0.532601	0.552163	0.254218	0.0413645	0.501137	0.17553	0.486812	0.0111187	0.527978	0.570621	1.79e-05	0.0868472	0.0461241	7	18	0.388889
KIAA1279	212453_at				0.949167	0.211841	0.0986327	0.0232999	0.623691	0.318921	0.0340221	0.569918	0.0038341	0.425996	0.145653	0.986318	0.040145	0.0238603	0.11149	0.000128451	0.0598355	0.00818654	7	18	0.388889
LYVE1	219059_s_at				0.162409	0.0142366	0.328426	0.989834	0.311582	0.924932	0.0309499	0.0232578	0.013902	0.709694	0.612391	0.0232992	0.0140552	0.257437	0.0376733	0.471556	0.493741	0.0789701	7	18	0.388889
MAN1A2	217920_at				0.78661	0.886011	0.108973	0.127096	0.172099	0.468603	0.006713	0.00936192	0.396225	0.0322232	0.170598	0.648493	0.00229165	0.0834392	0.0251624	0.00422863	0.071787	0.0218252	7	18	0.388889
MAN2A1	205105_at				0.0426686	0.0504242	0.109239	0.394479	0.0916731	0.458543	0.935253	0.804894	0.0230522	0.841105	0.582144	0.0437754	0.0327801	0.0398291	0.129808	0.00191376	0.864949	0.0107583	7	18	0.388889
METTL18	213528_at				0.1079	0.798795	0.00145178	0.0111371	0.00993511	0.0119679	0.0703463	0.0225359	0.327825	0.155372	0.220746	0.953466	0.407386	0.856813	0.0945838	0.00285975	0.521744	0.00453559	7	18	0.388889
NUP37	218622_at				0.409868	0.260903	0.0889728	0.000759818	0.658182	0.0625068	0.0137762	0.0806429	0.000521688	0.30665	0.781856	0.862141	0.0167004	0.742978	0.00986117	0.0126151	0.230807	0.01073	7	18	0.388889
PDIA3	208612_at				0.395558	0.780224	0.104761	0.10143	0.0474467	0.0316836	0.969416	0.259574	0.042857	0.55704	0.773024	0.0104816	0.0351506	0.278178	0.0277668	2.06e-07	0.292944	0.77923	7	18	0.388889
PEG10	212094_at				0.761558	0.843224	0.929316	0.569082	0.23862	0.343822	0.816341	0.416522	0.00289961	0.939267	0.0160156	0.0244643	0.000786336	0.255951	0.0219707	0.00848432	0.96735	0.0332006	7	18	0.388889
PIAS1	217864_s_at				0.00421574	0.0251071	0.0257266	0.0397678	0.595092	0.269022	0.104696	0.727882	0.0238177	0.316891	0.099041	0.149991	0.0318973	0.0500276	0.45723	0.00239116	0.88178	0.28535	7	18	0.388889
PPT1	200975_at				0.995904	0.150892	0.657356	0.733991	0.176754	0.225288	0.0350909	0.0228068	0.00281642	0.747725	0.345545	0.00279352	0.0036203	0.0968602	0.0207017	0.84454	0.0489882	0.11585	7	18	0.388889
PRKACA	202801_at				0.224764	0.0222425	0.00982664	0.0912598	0.00887874	0.0468729	0.192116	0.332472	0.000274625	0.541148	0.0313723	0.447476	0.580418	0.103934	0.856398	0.261402	0.909048	0.0334581	7	18	0.388889
PTPRC	212587_s_at				0.0409195	0.228245	0.0441258	0.0723966	0.0583226	0.0822474	0.0182895	0.341654	0.00423245	0.705734	0.173231	0.00434786	0.0166429	0.313321	0.0197945	0.343847	0.59411	0.606191	7	18	0.388889
RASSF2	203185_at				0.286419	0.222799	0.00285354	0.00628344	0.0100128	0.190621	0.290463	0.0842285	0.0959167	0.0249322	0.311877	0.0124027	0.0109816	0.142456	0.128897	0.200628	0.0338483	0.136588	7	18	0.388889
RP11-118B22.3	216384_x_at				0.127318	0.811956	0.0192991	0.0385828	0.0219402	0.0147699	0.0761172	0.00398665	0.038226	0.890105	0.0852179	0.991482	0.385412	0.27597	0.989139	0.022035	0.893946	0.316921	7	18	0.388889
RP11-267J23.4	216384_x_at				0.127318	0.811956	0.0192991	0.0385828	0.0219402	0.0147699	0.0761172	0.00398665	0.038226	0.890105	0.0852179	0.991482	0.385412	0.27597	0.989139	0.022035	0.893946	0.316921	7	18	0.388889
RPL39	208695_s_at				0.0428743	0.01759	0.0150906	0.48679	0.0256074	0.238174	0.476801	0.389465	0.724584	0.407472	0.642752	0.0124049	0.00593192	0.095241	0.159522	0.0105076	0.791041	0.0588573	7	18	0.388889
RPL39P3	208695_s_at				0.0428743	0.01759	0.0150906	0.48679	0.0256074	0.238174	0.476801	0.389465	0.724584	0.407472	0.642752	0.0124049	0.00593192	0.095241	0.159522	0.0105076	0.791041	0.0588573	7	18	0.388889
RPS29P28	217131_at				0.330439	0.654369	0.00956404	0.854378	0.0379883	0.241443	0.0360829	0.029465	0.621945	0.178117	0.0318457	0.109441	0.0281391	0.331506	0.739253	0.88158	0.0240803	0.822161	7	18	0.388889
RWDD1	219598_s_at				0.167149	0.0699082	0.0153279	0.238526	0.0275034	0.215016	0.0892254	0.203246	0.0130556	0.551591	0.365751	0.772077	0.0294161	0.582635	0.0160364	2.86e-09	0.0765568	0.0315523	7	18	0.388889
SMC4	201664_at				0.580061	0.953515	5.88e-05	0.0976371	0.42337	0.751155	0.412611	0.350115	0.00853719	0.344045	0.092686	0.469191	0.0254623	0.00963631	0.034076	0.0135839	0.0780568	0.0163775	7	18	0.388889
SNORA69	208695_s_at				0.0428743	0.01759	0.0150906	0.48679	0.0256074	0.238174	0.476801	0.389465	0.724584	0.407472	0.642752	0.0124049	0.00593192	0.095241	0.159522	0.0105076	0.791041	0.0588573	7	18	0.388889
SNX4	212652_s_at				0.577466	0.147058	0.613501	0.828079	0.834728	0.75346	0.0160058	0.0179609	0.00191827	0.924608	0.191425	0.902476	0.0264367	0.407806	0.016386	0.802283	0.0159001	0.0270731	7	18	0.388889
TMED2	200087_s_at				0.0348561	0.975114	0.00794192	0.0625421	0.0415749	0.158433	0.451768	0.619898	0.000857488	0.778017	0.731717	0.0362363	0.286384	0.948973	0.0410785	0.00350175	0.199091	0.0830928	7	18	0.388889
TYROBP	204122_at				0.197336	0.775772	0.00774773	0.0393533	0.592374	0.488091	0.00197945	0.0150882	0.717194	0.700047	0.22649	0.000347518	0.0041826	0.205368	0.588399	0.403691	0.454504	0.00089621	7	18	0.388889
ZNF175	205497_at				0.00568445	0.806591	0.0230206	0.520522	0.00679611	0.506978	0.0241414	0.00104141	0.159259	0.218911	0.720481	0.571441	0.331213	0.0542213	0.172975	0.000616898	0.459997	0.000618015	7	18	0.388889
ARHGAP25	38149_at	0.442073	0.821516	0.00323375	0.188478	0.101014	0.418831	0.00873518	0.950713	0.147876	0.000218935	0.0380142	0.0132102	0.0420336	0.452018	0.140282	0.281302	0.0852849	0.048571	0.00054859	0.643379	0.205436	8	21	0.380952
AC000111.3	234706_x_at				0.102791	0.0267292	0.554272	0.783721	0.0734598	0.2347	0.00264419	0.00564864		0.0771319	0.65214	0.700626	0.0304828		0.171728			0.033792	5	14	0.357143
AC004383.4	227488_at				0.215671	0.450141	0.252212	0.528678	0.0220218	0.0424393	0.00328718	0.0494326		0.00868732	0.592439	0.0523657	0.323808		0.836334			0.181885	5	14	0.357143
AC005162.4	243698_at				0.676584	0.91238	0.0179239	0.579998	0.0259617	0.460321	0.00520939	0.0190508		0.815266	0.71729	0.928006	0.0459788		0.376639			0.455001	5	14	0.357143
AC018737.1	235132_at				0.741246	0.894862	0.256028	0.0282117	0.0032732	0.919627	0.0301422	0.25019		0.14273	0.400375	0.650895	0.0403305		0.0320744			0.0812321	5	14	0.357143
ADAM15	1555896_a_at				0.0340235	0.00925422	0.885439	0.966463	0.613596	0.786467	0.0408424	0.0306789		0.667919	0.829181	0.777968	0.17326		0.825434			0.0384048	5	14	0.357143
AKIRIN2	223144_s_at				0.00459615	0.104165	0.225594	0.344821	0.0294207	0.0236005	0.729304	0.397694		0.529769	0.519357	0.104188	0.0243995		0.0756852			0.0178198	5	14	0.357143
ALPK3	228342_s_at				0.275392	0.214023	0.00586071	0.823773	0.00850576	0.369903	0.0691052	0.0352645		0.817411	0.348783	0.015067	0.0445731		0.446203			0.762151	5	14	0.357143
ATP5G3	228168_at				0.396678	0.524413	0.0182496	0.712499	0.741635	0.0432563	0.0717287	0.00127192		0.923229	0.126893	0.319847	0.602646		0.0291233			0.0353728	5	14	0.357143
BRI3BP	225716_at				0.14778	0.446242	0.233744	0.775047	0.473927	0.757821	0.227477	0.0467697		0.0321899	0.0201748	0.957187	0.976285		0.00122535			0.00158043	5	14	0.357143
C10orf54	225372_at				0.0134355	0.0122514	0.251186	0.0465218	0.766103	0.175615	0.381631	0.260192		0.862618	0.891687	0.721539	0.00794992		0.421997			0.000573213	5	14	0.357143
C1QC	225353_s_at				0.361811	0.560242	0.000434926	0.38958	0.0112592	0.460328	0.00343557	0.083104		0.922286	0.79857	0.00132026	0.023114		0.57391			0.828459	5	14	0.357143
C20orf194	225825_at				0.390268	0.146846	0.0430018	0.644347	0.00368479	0.288889	0.568835	0.773304		0.577954	0.0759204	0.0116804	0.043607		0.00831171			0.0958382	5	14	0.357143
C4orf29	236240_at				0.185322	0.822635	9.97e-05	0.0365595	0.152023	0.895476	0.0350384	0.00445576		0.774766	0.689915	0.205906	0.252679		0.975508			0.00937602	5	14	0.357143
CA8	1555445_at				0.514813	0.135874	0.149588	0.0363382	0.0430281	0.00866617	0.0293347	0.0194636		0.37345	0.709381	0.97741	0.880964		0.715693			0.941954	5	14	0.357143
CAMK1D	235626_at				0.299804	0.618501	0.200325	0.104641	0.00209671	0.0114461	0.0385109	0.0264888		0.881164	0.0479277	0.743138	0.959611		0.790451			0.897355	5	14	0.357143
CCDC113	222890_at				0.316773	0.0381826	0.756077	0.761765	0.827301	0.373619	0.0159603	0.0382152		0.0367832	0.862129	0.106913	0.0210655		0.214239			0.65146	5	14	0.357143
CCDC136	226972_s_at				0.302145	0.0239798	0.0474191	0.394064	0.0147699	0.496238	0.790572	0.913172		0.212764	0.0442364	0.00398946	0.927538		0.516239			0.313759	5	14	0.357143
CMYA5	233520_s_at				0.0424708	0.0400058	0.881152	0.949083	0.549269	0.841372	0.80365	0.903498		0.0162982	0.653966	0.907179	0.0180755		0.01445			0.136371	5	14	0.357143
COBLL1	229598_at				0.0358306	0.572339	0.0458423	0.661404	0.220677	0.863553	0.027535	0.105894		0.0493607	0.0830638	0.0920322	0.0371385		0.236545			0.785828	5	14	0.357143
COL6A6	230867_at				0.296232	0.850478	0.149468	0.562024	0.0365687	0.293668	0.929404	0.872873		0.123345	0.0200519	0.00129557	0.0424238		0.454922			0.0418026	5	14	0.357143
CUX1	227069_at				0.00415096	0.0160055	0.859401	0.510595	0.647639	0.699505	0.0492984	0.179305		0.121925	0.482112	0.96741	0.0440318		0.799053			0.0418973	5	14	0.357143
DMGDH	231790_at				0.0133985	0.00797426	0.0328189	0.35189	0.0346682	0.682393	0.758714	0.3633		0.487033	0.309833	0.93142	0.0909826		0.131303			0.00825564	5	14	0.357143
DNM1L	226154_at				0.590328	0.181406	0.738155	0.17239	0.302516	0.0456485	0.0298191	0.0172376		0.698627	0.419862	0.15606	0.0321819		0.00924008			0.186374	5	14	0.357143
DYNC1LI1	222479_s_at				0.205101	0.0495418	0.0497417	0.415735	0.126251	0.790662	0.656565	0.72275		0.0457938	0.320586	0.428502	0.0136883		0.0102323			0.621163	5	14	0.357143
ELL	1565254_s_at				0.529521	0.334034	0.126079	0.418183	0.0217952	0.917905	0.0130792	0.0458799		0.860899	0.0149595	0.00880618	0.206248		0.602706			0.117876	5	14	0.357143
ERMP1	222603_at				0.373003	0.811121	0.513239	0.768439	0.407726	0.149902	0.0441924	0.0397178		0.169589	0.145282	0.78346	0.00276403		0.0186784			0.0145346	5	14	0.357143
FAM63B	226873_at				0.681713	0.838744	0.0186993	0.476447	0.305087	0.720792	0.0359356	0.0270399		0.165562	0.886091	0.519323	0.249301		0.0161706			0.0243873	5	14	0.357143
FERMT3	223303_at				0.0681342	0.900015	0.089297	0.132507	0.00370006	0.00365885	0.726692	0.0500957		0.378231	0.843725	0.00428065	0.00056749		0.857707			0.000447678	5	14	0.357143
FNIP1	228768_at				0.0271862	0.738422	0.729866	0.202729	0.833522	0.715491	0.0461788	0.208404		0.894998	0.323003	0.544388	0.0271328		0.0352121			0.047048	5	14	0.357143
GJC1	243502_at				0.00806149	0.0248568	0.391888	0.0799477	0.0281977	0.420295	0.064795	0.00475669		0.030465	0.627874	0.0820367	0.784193		0.988714			0.202742	5	14	0.357143
HCST	223640_at				0.922634	0.632128	0.0235793	0.512859	0.291941	0.327239	0.0931226	0.0334996		0.618324	0.0369354	0.00715244	0.00824767		0.691294			0.879805	5	14	0.357143
HENMT1	225841_at				0.0254209	0.211359	0.011936	0.0271788	0.181329	0.44445	0.829108	0.197971		0.081318	0.181954	0.0219118	0.124004		0.321593			0.0213326	5	14	0.357143
HS6ST3	1552842_at				0.26938	0.182158	0.0438497	0.0279655	0.00250846	0.0302917	0.0231256	0.270298		0.826313	0.269193	0.153227	0.209237		0.0503596			0.702808	5	14	0.357143
IKZF1	227346_at				0.936	0.960659	0.122628	0.0305607	0.450538	0.220845	0.814582	0.995074		0.952576	0.231503	0.0416272	0.00848184		0.0384447			0.0155821	5	14	0.357143
ITIH5	1553243_at				0.0845543	0.701378	0.0466619	0.0954703	0.0264484	0.0266332	0.965921	0.662576		0.0787627	0.411298	0.0177049	0.000339582		0.971519			0.861539	5	14	0.357143
KCTD10	223208_at				0.578381	0.566773	0.0391595	0.0485639	0.0824791	0.017537	0.448447	0.997289		0.0448646	0.280911	0.0714441	0.0424562		0.529153			0.389084	5	14	0.357143
KIF21A	226003_at				0.392889	0.91704	0.205804	0.422318	0.00467739	0.0266222	0.3719	0.291786		0.0436273	0.404773	0.825994	0.611519		0.0368736			0.00758039	5	14	0.357143
LACTB	226354_at				0.619764	0.244884	0.394486	0.721545	0.989372	0.55966	0.122643	0.018765		0.0453822	0.562527	0.000702614	0.000366761		0.00389688			0.659523	5	14	0.357143
LIMA1	222457_s_at				0.022729	0.0364548	0.0113092	0.197074	0.0330137	0.376775	0.403968	0.122214		0.593553	0.511759	0.315904	0.198195		0.00655206			0.0776108	5	14	0.357143
LRRC58	225479_at				0.418378	0.895538	0.540926	0.600056	0.90801	0.440437	0.02762	0.0172069		0.00284975	0.120723	0.939807	0.435368		0.0064798			0.000308358	5	14	0.357143
LRRC8C	1558517_s_at				0.539477	0.551656	0.894283	0.0222791	0.287342	0.00132439	0.148018	0.0212213		0.381988	0.168485	0.709477	0.15854		0.0261198			0.00660744	5	14	0.357143
MAP1B	226084_at				0.909636	0.630562	0.034358	0.482724	0.005493	0.163306	0.333202	0.35411		0.522007	0.000834836	0.0099466	0.00488151		0.104635			0.60429	5	14	0.357143
MIR503	227488_at				0.215671	0.450141	0.252212	0.528678	0.0220218	0.0424393	0.00328718	0.0494326		0.00868732	0.592439	0.0523657	0.323808		0.836334			0.181885	5	14	0.357143
MS4A4A	1555728_a_at				0.600896	0.649644	0.516683	0.141737	0.492454	0.0801599	0.0063629	0.0064161		0.797751	0.316711	0.0130695	0.000404648		0.0154284			0.143196	5	14	0.357143
NFATC3	225141_at				0.846112	0.291287	0.951574	0.584748	0.506411	0.365484	0.0274261	0.0278631		0.232917	0.0249437	0.398207	0.010208		0.849764			0.0421392	5	14	0.357143
NOC2L	1559139_at				0.201782	0.0421275	0.559464	0.86169	0.0200329	0.0445686	0.81086	0.479062		0.263599	0.215873	0.950761	0.0185948		0.180167			0.00736935	5	14	0.357143
NR2C2AP	226839_at				0.0266452	0.0223915	0.0828791	0.635788	0.310751	0.902689	0.02693	0.0265913		0.719096	0.0200881	0.506542	0.727408		0.765908			0.969233	5	14	0.357143
PDK4	225207_at				0.369415	0.0218302	0.346147	0.818723	0.0665663	0.301772	0.02607	0.0441281		0.48308	0.844965	0.0445024	0.00039021		0.310213			0.657311	5	14	0.357143
PDSS2	1555886_at				0.0339833	0.0415298	0.102088	0.288897	0.19412	0.588512	0.0606686	0.00404139		0.799895	0.0199923	0.665003	0.141917		0.0104861			0.662921	5	14	0.357143
PHKB	242248_at				0.643764	0.668114	0.0390393	0.464565	0.00970855	0.210176	0.0297329	0.092475		0.414321	0.142938	0.336572	0.00369776		0.413528			0.00366956	5	14	0.357143
PHLDA1	225842_at				0.30735	0.761105	0.0330629	0.0329003	0.0152273	0.031161	0.271022	0.229862		0.821462	0.664144	0.236989	0.0119707		0.430982			0.324033	5	14	0.357143
PML	239582_at				0.552273	0.0373343	0.847871	0.0434425	0.539645	0.00298022	0.373364	0.0126904		0.402355	0.343807	0.240026	0.0107338		0.332202			0.655476	5	14	0.357143
PTBP3	224617_at				0.650965	0.584097	0.102791	0.100453	0.00744519	0.0258448	0.180866	0.506723		0.196353	0.77929	0.0357885	0.00164977		0.0415753			0.5223	5	14	0.357143
RAD23B	223598_at				0.214307	0.967156	0.0357012	0.747296	0.0358747	0.813276	0.453133	0.537312		0.0356763	0.425415	0.271961	0.0413745		0.0168943			0.252546	5	14	0.357143
RAP1GDS1	237856_at				0.0604066	0.915911	0.0190114	0.440752	0.010835	0.351735	0.0452817	0.642384		0.52179	0.0785898	0.877252	0.0422114		0.309631			0.0198175	5	14	0.357143
RP11-159G9.5	1556744_a_at				0.00038277	0.182924	0.0414138	0.0249902	0.0965345	0.0151468	0.867256	0.305858		0.0304702	0.821432	0.697765	0.886639		0.836994			0.0595201	5	14	0.357143
RP11-49I11.1	1568633_a_at				0.101478	0.664114	0.864616	0.81658	0.280667	0.0388949	0.000764804	0.0348198		0.277595	0.558718	0.209083	0.0288136		0.213127			0.0106497	5	14	0.357143
RP11-835E18.2	228160_at				0.902446	0.419866	0.839729	0.778526	0.326586	0.28526	0.00215804	0.272198		0.670728	0.0345984	0.041699	0.00924436		0.926288			0.0120442	5	14	0.357143
RP11-93O14.2	233864_s_at				0.0468232	0.168339	0.385181	0.0114252	0.410826	0.00938128	0.862799	0.520552		0.420673	0.293032	0.196176	0.457508		0.0094169			0.0323005	5	14	0.357143
RP11-96D1.10	225141_at				0.846112	0.291287	0.951574	0.584748	0.506411	0.365484	0.0274261	0.0278631		0.232917	0.0249437	0.398207	0.010208		0.849764			0.0421392	5	14	0.357143
RUNDC3B	241703_at				0.0489156	0.20119	0.245003	0.0446905	0.618809	0.226085	0.310256	0.149594		0.0492537	0.242017	0.702381	0.0434327		0.0173808			0.622552	5	14	0.357143
SAMHD1	235964_x_at				0.732516	0.960587	0.00513705	0.0617911	0.00832114	0.0860378	0.34734	0.453511		0.985912	0.22507	0.0459258	0.00479454		0.0266949			0.435771	5	14	0.357143
SBK1	226548_at				0.520305	0.149563	0.00518803	0.0175616	0.0132658	0.0247406	0.499444	0.487009		0.81268	0.481116	0.623817	0.0145638		0.166708			0.309565	5	14	0.357143
SDF4	232032_x_at				0.00915793	0.0392902	0.164196	0.345788	0.464488	0.317187	0.989006	0.409067		0.148591	0.0360886	0.0137915	0.302847		0.22565			0.0297203	5	14	0.357143
SGMS2	242963_at				0.541119	0.654712	0.0212034	0.00217261	0.0868846	0.00616337	0.51855	0.0110526		0.551584	0.447666	0.0117331	0.249891		0.606062			0.481716	5	14	0.357143
SLC18B1	226301_at				0.604284	0.890128	0.135906	0.0495799	0.874126	0.388675	0.191627	0.0484711		0.41429	0.111687	0.0327406	0.00242916		0.264155			0.0255026	5	14	0.357143
SLC45A1	230458_at				0.0702489	0.484347	0.0268146	0.0199491	0.569755	0.935046	0.0440817	0.00589193		0.570939	0.522087	0.62875	0.020571		0.53631			0.912502	5	14	0.357143
SPG7	230885_at				0.000798311	0.0173273	0.00448805	0.0357958	0.0274894	0.0863393	0.807857	0.262275		0.958825	0.136818	0.840908	0.175181		0.984578			0.461164	5	14	0.357143
SRGAP1	233888_s_at				0.44427	0.938574	0.0970677	0.981965	0.0229506	0.203416	0.196583	0.551099		0.28359	0.0440432	0.0390848	0.042789		0.0647426			0.0401598	5	14	0.357143
TAGAP	229723_at				0.92748	0.389432	0.0126918	0.00245063	0.156645	0.0618032	0.0524331	0.0412271		0.221365	0.226317	0.0575038	0.00561789		0.0060851			0.568278	5	14	0.357143
TMEM209	235158_at				0.208709	0.767442	0.0040506	0.0112364	0.0671543	0.103607	0.0213508	0.0269551		0.826048	0.285918	0.973383	0.38977		0.0174756			0.12805	5	14	0.357143
VPS35	233864_s_at				0.0468232	0.168339	0.385181	0.0114252	0.410826	0.00938128	0.862799	0.520552		0.420673	0.293032	0.196176	0.457508		0.0094169			0.0323005	5	14	0.357143
XXyac-YR29IB3.1	1562107_at				0.0239889	0.369144	0.327368	0.116578	0.0441811	0.0389638	0.0468177	0.0416611		0.779353	0.538218	0.278316	0.0641204		0.277927			0.172633	5	14	0.357143
ZFHX3	242738_s_at				0.336808	0.828116	0.0342449	0.376092	0.0274957	0.276594	0.814453	0.0969807		0.680211	0.24197	0.0404135	0.0302655		0.0144423			0.132365	5	14	0.357143
ZMAT3	228315_at				0.0317982	0.474546	0.0561925	0.754391	0.0460353	0.675102	0.35635	0.787237		0.808961	0.51785	0.149154	0.00461564		0.00313403			0.00757773	5	14	0.357143
ZNF100	238791_at				0.944178	0.869922	0.0189292	0.346045	0.0143308	0.325551	0.891318	0.964752		0.551201	0.0382992	0.543567	0.270977		0.0385847			0.0134925	5	14	0.357143
ZNF275	225382_at				0.155194	0.194117	0.00189774	0.00956167	0.0213886	0.153652	0.785857	0.417569		0.300144	0.0655278	0.111369	0.021568		0.670307			0.0360795	5	14	0.357143
ZNF416	223589_at				0.353081	0.499774	0.0106266	0.0149792	0.0305108	0.0284107	0.402705	0.649271		0.0417396	0.674452	0.0776668	0.234694		0.886832			0.815008	5	14	0.357143
ZNF555	1553286_at				0.044943	0.0263254	0.00023308	0.00186554	0.411463	0.95279	0.15154	0.0804247		0.213243	0.85753	0.217848	0.875041		0.170151			0.0349409	5	14	0.357143
ZNF701	236589_at				0.0219372	0.196248	0.0103644	0.125903	0.0118711	0.19427	0.169476	0.203129		0.201337	0.0181795	0.683468	0.17243		0.170694			0.0110416	5	14	0.357143
ZNF75A	227670_at				0.0472197	0.71592	0.0085763	0.0415066	0.302215	0.11544	0.00492581	0.0361979		0.411489	0.27339	0.428725	0.386183		0.449241			0.089896	5	14	0.357143
ZNF805	235398_at				0.152944	0.447283	0.00238166	0.0276986	0.214326	0.757183	0.0137552	0.00764104		0.698436	0.834077	0.349792	0.966698		0.897823			0.0467828	5	14	0.357143
ABCA1	203505_at				0.658994	0.435312	0.0160954	0.113445	0.00470584	0.0261161	0.030171	0.068531	0.0748105	0.973929	0.22976	0.220872	0.867286	0.690366	0.00192154	0.0306186	0.0782912	0.523847	6	18	0.333333
ABHD10	218633_x_at				0.927962	0.354448	0.925187	0.743176	0.936004	0.727666	0.105101	0.0236134	0.00918719	0.629841	0.00808412	0.929307	0.129653	0.0446497	0.538878	0.023479	0.144873	0.0154835	6	18	0.333333
AC019097.7	209259_s_at				0.53661	0.647057	0.0471686	0.00784749	0.504547	0.227833	0.433229	0.237868	0.00106873	0.203481	0.250843	0.205384	0.16791	0.0497902	0.000929579	0.393296	0.0812725	0.0361272	6	18	0.333333
ACOX1	213501_at				0.49173	0.163879	0.00206518	0.00229357	0.92743	0.620817	0.00086136	0.0123197	0.0273064	0.766336	0.708229	0.0555624	0.254962	0.0929406	0.234589	0.0301818	0.148029	0.83731	6	18	0.333333
ACSBG2	221716_s_at				0.399028	0.78045	0.575806	0.195317	0.0327492	0.026402	0.0140797	0.0255837	0.0320142	0.199817	0.63111	0.433116	0.0643615	0.0331998	0.570618	0.485645	0.389967	0.732577	6	18	0.333333
ADAM12	202952_s_at				0.505478	0.753064	0.0067537	0.853411	0.0027576	0.564017	0.601813	0.432929	0.141279	0.168299	0.33844	0.0169503	0.00113614	0.883356	0.0262629	0.00418261	0.515398	0.435541	6	18	0.333333
ADCY6	209195_s_at				0.0178115	0.161658	0.709824	0.129493	0.161404	0.00359362	0.416237	0.755917	0.00277562	0.826783	0.0103495	0.932613	0.0481339	0.255416	0.00857961	0.716862	0.314396	0.819051	6	18	0.333333
ADIPOR1	217748_at				0.119418	0.416517	0.543477	0.0341744	0.385458	0.00309222	0.908088	0.702851	0.0406307	0.474325	0.240468	0.216452	0.0159887	0.540742	0.0465249	0.0429954	0.859002	0.697169	6	18	0.333333
AGA	204332_s_at				0.818139	0.311422	0.0853568	0.361033	0.0535182	0.105231	0.475838	0.276574	0.00865258	0.00520105	0.735545	0.00538976	0.00638241	0.597757	0.0411783	0.168883	0.284686	0.0180267	6	18	0.333333
AL162458.1	203936_s_at				0.199865	0.225613	0.462957	0.580969	0.670863	0.652947	0.0348219	0.00679959	0.907887	0.136688	0.425483	0.0104654	0.00566437	0.00303395	0.598042	0.0384173	0.456928	0.0865232	6	18	0.333333
ALDH6A1	221589_s_at				0.209699	0.891463	0.0165371	0.0260647	0.0996928	0.13127	0.000620758	0.0398498	0.108296	0.141985	0.298649	0.0092115	0.791954	0.788738	0.723376	0.00456048	0.266188	0.0656155	6	18	0.333333
AOC3	204894_s_at				0.42997	0.954603	0.241184	0.0425657	0.946757	0.0218053	0.96058	0.225648	0.00258875	0.645412	0.57759	0.0103533	0.549619	0.0954531	0.0190608	0.00590702	0.879166	0.929863	6	18	0.333333
APOH	205216_s_at				0.0748532	0.782861	0.109228	0.016713	0.369797	0.00762024	0.00214429	0.000924496	0.0302702	0.70307	0.98719	0.868634	0.205633	0.251779	0.000945927	0.844354	0.813626	0.0673119	6	18	0.333333
ARFGEF2	218098_at				0.339598	0.253436	0.117563	0.554811	0.418711	0.245111	0.518573	0.179928	0.000968886	0.411658	0.0426201	0.176469	0.0409215	0.010508	0.0267589	0.74301	0.193357	0.0200667	6	18	0.333333
ARHGEF2	209435_s_at				0.368407	0.737993	0.00125727	0.00121552	0.00481782	0.0121604	0.843154	0.62616	0.02445	0.497696	0.283526	0.77141	0.60082	0.154955	0.00454223	0.500385	0.394311	0.496826	6	18	0.333333
ASNS	205047_s_at				0.68199	0.643412	0.000171309	0.029601	0.00324019	0.0917697	0.703567	0.875876	0.00974482	0.512495	0.902247	0.220418	0.176494	0.0414965	0.553435	0.580942	0.313461	0.0113951	6	18	0.333333
ATP1B3	208836_at				0.888977	0.600204	0.00768879	0.0289104	0.0090678	0.0167487	0.477796	0.443679	0.0811468	0.291726	0.545918	0.470707	0.425907	0.430298	0.0188124	0.000365119	0.437566	0.100551	6	18	0.333333
ATXN10	208832_at				0.705963	0.153653	0.0147144	0.104808	0.183545	0.744819	0.193981	0.196159	0.0497968	0.009712	0.122932	0.24777	0.0365813	0.770781	0.00885039	0.935086	0.261911	0.0378294	6	18	0.333333
BTBD1	217945_at				0.385524	0.76171	0.224852	0.661352	0.0206537	0.0945066	0.268873	0.272295	0.0263545	0.932789	0.510929	0.568122	0.497569	0.0895573	0.000285775	0.00404441	0.0330881	0.00254112	6	18	0.333333
BTF3	214800_x_at				0.0354562	0.475125	0.253994	0.952231	0.0223196	0.308015	0.17074	0.640671	0.13293	0.507312	0.928925	0.0380547	0.662619	0.345705	0.0267503	0.00830886	0.313919	0.0474969	6	18	0.333333
C19orf42	221988_at				0.596665	0.662625	0.961913	0.0964476	0.661226	0.0198428	0.00156682	0.00331075	0.00213144	0.0262607	0.489255	0.474942	0.304303	0.0651346	0.508181	0.0348759	0.754219	0.116593	6	18	0.333333
C6orf120	221787_at				0.887776	0.421972	0.827501	0.893027	0.915313	0.915429	0.0381467	0.0917344	0.00734178	0.0285372	0.247777	0.0350703	0.00978626	0.140414	0.107155	0.00383115	0.0705805	0.0757686	6	18	0.333333
CAAP1	219276_x_at				0.143232	0.5166	0.885562	0.573963	0.398459	0.196455	0.113116	0.0374313	0.00427894	0.495852	0.0429365	0.00748119	0.148973	0.131804	0.0371598	0.660948	0.0181387	0.0603703	6	18	0.333333
CACNA1S	217515_s_at				0.30488	0.535052	0.0400974	0.685773	0.0418923	0.792147	0.359584	0.0333885	0.020372	0.288995	0.360812	0.438939	0.00257765	0.00216179	0.362394	0.666974	0.641583	0.114637	6	18	0.333333
CALM1	200655_s_at				0.0127103	0.0390523	0.21571	0.258929	0.137363	0.254992	0.294432	0.0429621	0.0158374	0.846613	0.538595	0.162565	0.277756	0.488278	0.228412	1.95e-05	0.0409892	0.539098	6	18	0.333333
CCL13	206407_s_at				0.648172	0.794923	0.91987	0.735513	0.79782	0.950235	0.0120524	0.00425599	0.00900552	0.997403	0.042405	0.0108727	0.0192689	0.169362	0.358353	0.0714262	0.208759	0.527161	6	18	0.333333
CCL4	204103_at				0.327887	0.39469	0.00882194	0.24705	0.143829	0.725228	0.131412	0.0441693	0.0140057	0.000697386	0.777467	0.0824761	0.00592333	0.255668	0.0290841	0.959546	0.100095	0.201108	6	18	0.333333
CCNB1	214710_s_at				0.983938	0.623088	0.0198339	0.0766457	0.015605	0.0348061	0.369447	0.00930642	0.272858	0.617864	0.0357068	0.0905471	0.00153147	0.0733409	0.518752	0.614714	0.600164	0.372435	6	18	0.333333
CD36	209555_s_at				0.466648	0.0505412	0.316478	0.369741	0.0705343	0.0450397	0.996003	0.548298	0.109443	0.459216	0.0332604	0.0475675	0.013137	0.0259456	0.0874378	0.7526	0.144384	0.00438765	6	18	0.333333
CD99	201029_s_at				0.416388	0.179974	0.0990088	0.744669	0.00876819	0.264357	0.261899	0.574081	0.0301346	0.0167892	0.699067	0.0107292	0.00124332	0.808245	0.814348	0.0202094	0.0664432	0.362909	6	18	0.333333
CDC20	202870_s_at				0.868463	0.567848	0.0203243	0.00365538	0.797267	0.722509	0.0151619	0.110657	0.0372932	0.0150062	0.939939	0.0108575	0.0917177	0.556924	0.715217	0.268801	0.404932	0.530292	6	18	0.333333
CDC23	202892_at				0.672419	0.292421	0.26447	0.156927	0.385632	0.150174	0.0233235	0.0380245	0.0124069	0.33093	0.143157	0.437347	0.207122	0.028447	0.0314943	0.0676069	0.167912	0.0384511	6	18	0.333333
CDC40	203376_at				0.386676	0.118608	0.315704	0.0190582	0.368297	0.0208207	0.0927204	0.138358	6.05e-05	0.349244	0.288908	0.220583	0.636821	0.142415	0.0479656	9.9e-05	0.0852635	0.0219609	6	18	0.333333
CDK11A	211289_x_at				0.118298	0.00342575	0.0494745	0.282537	0.0997763	0.710189	0.00634546	0.0248223	0.397738	0.388324	0.257008	0.919091	0.000579162	0.0150526	0.547203	0.19782	0.454382	0.148128	6	18	0.333333
CDK11B	211289_x_at				0.118298	0.00342575	0.0494745	0.282537	0.0997763	0.710189	0.00634546	0.0248223	0.397738	0.388324	0.257008	0.919091	0.000579162	0.0150526	0.547203	0.19782	0.454382	0.148128	6	18	0.333333
CLASP2	212308_at				0.46554	0.360586	0.160124	0.100192	0.625472	0.439112	0.0124476	0.0493663	0.0449789	0.283879	0.152573	0.218476	0.0236126	0.000855543	0.0566829	0.552383	0.597876	0.00902527	6	18	0.333333
CLN3	210859_x_at				0.0011625	0.00750201	0.265435	0.629793	0.906421	0.983283	0.033811	0.146355	0.0387558	0.93127	0.731283	0.514519	0.0105014	0.282919	0.220766	0.202097	0.18672	0.00565215	6	18	0.333333
CROCCP3	219139_s_at				0.255656	0.971503	0.0068194	0.271156	0.0473957	0.341046	0.0781943	0.945462	0.0103249	0.336189	0.852755	0.922069	0.0241773	0.950121	0.00836574	0.0130761	0.699105	0.312273	6	18	0.333333
CSNK1G3	220768_s_at				0.940562	0.913196	0.0647675	0.0992594	0.0586607	0.304409	0.0148526	0.045083	0.00846088	0.840335	0.944974	0.359781	0.503284	0.0882681	0.000715971	0.0323631	0.0484845	0.200705	6	18	0.333333
CTBS	218924_s_at				0.867905	0.268933	0.0746249	0.0114216	0.517627	0.174833	0.020501	0.0261689	0.0236163	0.888645	0.889716	0.209053	0.0376212	0.750013	0.00354685	0.679888	0.357686	0.630196	6	18	0.333333
CTNNA3	220815_at				0.0410835	0.701719	0.0150639	0.483379	0.391252	0.649554	0.0372129	0.0284248	0.0252801	0.686575	0.423093	0.68753	0.11547	0.101843	0.428952	0.873299	0.573239	0.0452915	6	18	0.333333
CTSS	202902_s_at				0.0403459	0.136012	0.284406	0.115851	0.2015	0.134919	0.0145238	0.00770136	0.174046	0.798238	0.253504	0.00777531	0.000296008	0.374666	0.047464	0.908426	0.121819	0.273929	6	18	0.333333
CYB5R3	201885_s_at				0.0272248	0.032104	0.0389261	0.716531	0.0892741	0.693823	0.539742	0.0231794	0.913133	0.385225	0.754438	0.809892	0.801903	0.347086	0.72827	0.0111104	0.309144	0.0285001	6	18	0.333333
CYCS	208905_at				0.918689	0.226151	0.300563	0.913243	0.526164	0.0493517	0.0471253	0.0164195	0.00678525	0.577313	0.629198	0.744696	0.355899	0.721736	0.0265755	0.522569	0.169248	0.0462838	6	18	0.333333
CYCSP55	208905_at				0.918689	0.226151	0.300563	0.913243	0.526164	0.0493517	0.0471253	0.0164195	0.00678525	0.577313	0.629198	0.744696	0.355899	0.721736	0.0265755	0.522569	0.169248	0.0462838	6	18	0.333333
DBI	202428_x_at				0.00896209	0.0361595	0.0825693	0.798621	0.00932173	0.0466792	0.971084	0.995135	0.157977	0.838189	0.222607	0.745015	0.999095	0.366968	0.000276833	0.000366668	0.350766	0.93619	6	18	0.333333
DBNDD1	222234_s_at				0.88388	0.261354	0.0172682	0.0266803	0.00584357	0.00516989	0.000390449	0.0542468	0.0532485	0.0402278	0.28541	0.847599	0.128227	0.272074	0.861032	0.962715	0.368749	0.565476	6	18	0.333333
DCAF15	91952_at				0.089953	0.929531	0.19799	0.465697	0.298446	0.382633	0.0272024	0.0147048	0.101271	0.531412	0.786191	0.221868	0.190269	0.0188805	0.25504	0.000212648	0.0443427	0.00558749	6	18	0.333333
DLAT	212568_s_at				0.88591	0.176009	0.276565	0.111547	0.617056	0.0429066	0.0419392	0.00120895	0.0191715	0.683538	0.107435	0.881013	0.40732	0.0842501	0.00432213	0.618245	0.209676	0.00155648	6	18	0.333333
DNAJB14	219237_s_at				0.242809	0.525832	0.434595	0.380572	0.0265494	0.0982977	0.243947	0.27261	0.0152568	0.471125	0.0226601	0.229386	0.0546585	0.288814	0.00614275	0.0307231	0.25394	0.000665799	6	18	0.333333
DOCK6	55583_at				0.0127726	0.538273	0.247151	0.0244202	0.635912	0.0462151	0.538945	0.592963	0.0126804	0.432	0.26643	0.610982	0.261911	0.0349779	0.407639	0.585021	0.00771732	0.446312	6	18	0.333333
DPT	207977_s_at				0.113261	0.0227222	0.296316	0.447496	0.290898	0.586096	0.0269214	0.0316402	0.0476852	0.225037	0.475587	0.0953034	0.0463614	0.401158	0.0247828	0.765497	0.877262	0.891509	6	18	0.333333
DUSP6	208892_s_at				0.789557	0.940689	0.02876	0.837024	0.0274174	0.688684	0.983169	0.768144	0.34692	0.0390144	0.0607936	0.96709	0.024998	0.763801	0.0276961	0.00117839	0.329864	0.140931	6	18	0.333333
DYNC1I1	205348_s_at				0.661825	0.776639	0.00631884	0.160418	0.00206399	0.0454426	0.646012	0.988304	0.00342299	0.824247	0.632799	0.0366168	0.000802962	0.350638	0.503498	0.549991	0.965146	0.126892	6	18	0.333333
E2F3	203692_s_at				0.47301	0.789112	0.0171737	0.400038	0.00930811	0.0553544	0.808229	0.329732	0.0191548	0.671246	0.288774	0.0981601	0.0233488	0.0276403	0.347754	0.0368263	0.413632	0.137808	6	18	0.333333
EPAS1	200878_at				0.533022	0.296019	0.907068	0.0129193	0.693542	0.0189375	0.154733	0.0726574	0.0244231	0.248382	0.599657	0.648408	0.0322098	0.0473214	0.114017	0.618845	0.0319864	0.556063	6	18	0.333333
EXOSC4	91684_g_at				0.244699	0.0166908	0.386076	0.30888	0.0124615	0.968896	0.0481859	0.0454585	0.558094	0.4471	0.618814	0.535371	0.0427866	0.0672382	0.249811	0.0574582	0.861151	0.00304699	6	18	0.333333
FAM190B	209379_s_at				0.283384	0.992409	0.0238561	0.307635	0.00512295	0.101296	0.593042	0.728406	0.00257535	0.696047	0.0908059	0.496692	0.0222097	0.12895	0.00654735	0.7639	0.138268	0.00835739	6	18	0.333333
FAM192A	217896_s_at				0.198706	0.972469	0.0357194	0.0160938	0.0540343	0.0421788	0.312141	0.0683446	0.129929	0.646014	0.00845037	0.158573	0.0623085	0.0732043	0.00979383	0.357357	0.00514397	0.722463	6	18	0.333333
FAM49B	217916_s_at				0.0486636	0.514665	0.94063	0.759576	0.581434	0.692235	0.0763467	0.0376345	0.00370221	0.00600604	0.104673	0.758542	0.271768	0.518417	0.0471996	0.0271856	0.717498	0.535858	6	18	0.333333
FAM69A	216044_x_at				0.520132	0.707715	0.880049	0.922075	0.788172	0.776156	0.677287	0.470892	0.0226484	0.487758	0.660187	0.0726245	0.00485158	0.0131225	0.185523	0.0382039	0.0280115	0.00277223	6	18	0.333333
FBXO9	210638_s_at				0.70199	0.0534484	0.0446539	0.00839683	0.0959983	0.0155387	0.819214	0.911252	0.0224774	0.591621	0.477303	0.990155	0.0553659	0.104196	0.738856	0.00446441	0.793368	0.0118133	6	18	0.333333
FGR	208438_s_at				0.77973	0.0233704	0.119549	0.0179967	0.912422	0.345247	0.934891	0.708194	0.00817893	0.040819	0.413033	0.0564137	0.0245806	0.951942	0.503911	0.795228	0.180862	0.00150896	6	18	0.333333
FPR1	205119_s_at				0.970838	0.48117	0.181393	0.00944482	0.94615	0.245085	0.613419	0.632339	0.0402513	0.0165558	0.717421	0.187164	0.72542	0.0119445	0.73428	0.0166585	0.0956131	0.00708501	6	18	0.333333
FRZB	203698_s_at				0.265114	0.89952	0.16266	0.045369	0.413242	0.354567	0.0452009	0.012039	0.682	0.645378	0.0881824	0.0086199	0.0129406	0.357505	0.0740368	0.00726153	0.471329	0.0545464	6	18	0.333333
FTH1	214211_at				0.610834	0.59059	0.559743	0.620406	0.581574	0.525264	0.00409754	0.0499742	0.0660505	0.549357	0.422798	0.0554423	0.0183731	0.308597	0.0360379	0.00987261	0.0683243	0.00657412	6	18	0.333333
GCLC	202923_s_at				0.146808	0.514582	0.00027363	0.000363318	0.363128	0.417751	0.0241924	0.262238	0.110218	0.98938	0.571949	0.524587	0.695911	0.00704108	0.0143479	0.630594	0.945009	0.0126963	6	18	0.333333
GGA3	209411_s_at				0.21341	0.0121933	0.139095	0.578066	0.0737284	0.373781	0.0409275	0.0437864	0.0148293	0.442477	0.0379895	0.425963	0.70023	0.0198756	0.25859	0.924887	0.696415	0.143642	6	18	0.333333
GGNBP2	218079_s_at				0.215629	0.625011	0.299402	0.0164271	0.851417	0.143267	0.495547	0.574116	0.00921761	0.976722	0.0225771	0.477287	0.159947	0.0493687	0.158767	0.0307088	0.824543	0.0112104	6	18	0.333333
GPR171	207651_at				0.0273516	0.0815161	0.738131	0.0496499	0.0933307	0.661133	0.942478	0.985809	0.0377435	0.86771	0.0894481	0.0520809	0.0695536	0.151384	0.0350079	0.00127873	0.80988	0.00262329	6	18	0.333333
GTF2B	208066_s_at				0.800066	0.0409288	0.680281	0.0183384	0.968634	0.0492109	0.473929	0.53277	0.00610792	0.156708	0.884354	0.915219	0.776103	0.00695666	0.117248	0.00128958	0.248293	0.309476	6	18	0.333333
GULP1	204235_s_at				0.414772	0.840079	0.0108519	0.0209382	0.476317	0.46899	0.000139874	0.00734344	0.118898	0.981571	0.0263783	0.676306	0.114961	0.0800126	0.0291136	0.177566	0.589548	0.796693	6	18	0.333333
HMGB1P3	210985_s_at				0.0223249	0.895307	0.418068	0.0128896	0.349201	0.0287758	0.918798	0.575601	0.00208654	0.322254	0.523921	0.500565	0.964061	0.765604	0.140631	0.031266	0.489217	0.040412	6	18	0.333333
HS2ST1	203283_s_at				0.431333	0.50969	0.819169	0.741184	0.919557	0.870689	0.0177265	0.0142641	0.0425403	0.0215266	0.324099	0.14734	0.00935271	0.162531	0.10016	0.835078	0.209541	0.0364927	6	18	0.333333
HS6ST1	206997_s_at				0.604534	0.380297	0.0373677	0.129422	0.00563664	0.0329109	0.015372	0.122645	0.0378616	0.427588	0.142	0.873614	0.187866	0.016058	0.726495	0.289363	0.0751455	0.9667	6	18	0.333333
HS6ST1P1	206997_s_at				0.604534	0.380297	0.0373677	0.129422	0.00563664	0.0329109	0.015372	0.122645	0.0378616	0.427588	0.142	0.873614	0.187866	0.016058	0.726495	0.289363	0.0751455	0.9667	6	18	0.333333
HSP90B1	200599_s_at				0.188239	0.976938	0.0297847	0.2167	0.000179146	0.00437596	0.789543	0.849752	0.0111694	0.818009	0.0943683	0.429222	0.103471	0.661019	0.0368776	0.269777	0.306007	0.00884939	6	18	0.333333
ID2	201565_s_at				0.261572	0.0319199	0.0388403	0.198955	0.00285616	0.157243	0.0963134	0.155966	0.0166601	0.894854	0.286847	0.26165	0.0178731	0.179887	0.541466	0.00043336	0.529973	0.504565	6	18	0.333333
IMMT	200955_at				0.336077	0.244991	0.682336	0.87777	0.365706	0.364847	0.0429991	0.0149669	0.00946774	0.394125	0.607857	0.542986	0.555075	0.0212642	0.501169	0.0250426	0.629455	0.0124696	6	18	0.333333
INSIG2	209566_at				0.631967	0.396155	0.639613	0.681323	0.807331	0.984957	0.692585	0.367295	0.037323	0.504801	0.424346	0.672265	0.000669704	0.0478768	0.232167	0.000290975	0.0285652	0.0121766	6	18	0.333333
ITGAV	202351_at				0.480043	0.985468	0.703637	0.565449	0.0322607	0.0175969	0.213161	0.229566	0.0413046	0.899658	0.146693	0.103758	0.000988339	0.108677	0.0016536	0.0664741	0.0700301	0.002821	6	18	0.333333
KCNMA1	221584_s_at				0.953703	0.1749	0.00215533	0.236852	0.0545674	0.486115	0.0114713	0.0599327	0.00562719	0.669289	0.214241	0.0212232	0.00110807	0.579425	0.102088	0.212371	0.00779466	0.792205	6	18	0.333333
KCTD12	212192_at				0.264466	0.633349	0.132559	0.0143193	0.0941949	0.00747504	0.0706839	0.0202485	0.040788	0.429105	0.981761	0.175205	0.0275426	0.327672	0.0123107	0.679132	0.452013	0.448399	6	18	0.333333
KCTD14	219545_at				0.281756	0.964294	0.245479	0.567304	0.533902	0.798712	0.00331491	0.000858229	0.294406	0.016534	0.497136	0.874878	0.00711642	0.907351	0.66891	0.00858796	0.36174	0.0255994	6	18	0.333333
KITLG	211124_s_at				0.0112504	0.332061	0.0171257	0.466791	0.214938	0.581649	0.0607988	0.0428124	0.0112809	0.207225	0.230066	0.910687	0.995232	0.0144649	0.76387	0.0231178	0.689909	0.650798	6	18	0.333333
KLF9	203543_s_at				0.848129	0.0842087	0.163451	0.0125165	0.641057	0.146047	0.0433846	0.041446	0.0115157	0.354437	0.690958	0.827792	0.0187892	0.351945	0.0881954	0.000188249	0.401542	0.277994	6	18	0.333333
LEPROTL1	202594_at				0.55924	0.626127	0.834029	0.926725	0.00982061	0.0131344	0.392059	0.206916	0.0494266	0.813137	0.568254	0.849599	0.788283	0.940484	0.169986	0.00682938	0.0464101	0.0304833	6	18	0.333333
LHFPL2	212658_at				0.969523	0.043977	0.0190077	0.781604	0.0624033	0.907297	0.0167015	0.0211263	0.0891801	0.760445	0.671343	0.179996	0.00183925	0.627609	0.0426426	0.0871366	0.683289	0.732393	6	18	0.333333
LSP1	203523_at				0.0386397	0.293211	0.018495	0.649419	0.0115276	0.216789	0.180743	0.288451	0.0118814	0.409412	0.0710518	0.0756799	0.945116	0.193511	0.700175	0.00611741	0.0578436	0.00331124	6	18	0.333333
LYZL6	207343_at				0.740813	0.351506	0.879351	0.467514	0.242808	0.0010134	0.0377322	0.0458499	0.0333817	0.340938	0.192419	0.610358	0.0143024	0.0029596	0.802026	0.165067	0.433391	0.140146	6	18	0.333333
MCOLN1	219952_s_at				0.0175811	0.706546	0.0566704	0.957246	0.0377857	0.715084	0.232673	0.375684	0.00598277	0.752938	0.112225	0.00756866	0.924919	0.291394	0.0375572	0.16591	0.779807	0.0163613	6	18	0.333333
MDH1	200978_at				0.44298	0.079582	0.161193	0.419296	0.801206	0.412568	0.0303624	0.0321664	0.00858877	0.623366	0.98313	0.982209	0.943062	0.00964178	0.203614	0.00338661	0.419612	0.0172513	6	18	0.333333
MFAP4	212713_at				0.309032	0.715964	0.833662	0.569191	0.824238	0.586197	0.0058314	0.000745738	0.019072	0.361678	0.766105	0.0144704	0.0419742	0.719673	0.18974	0.0413982	0.650158	0.309192	6	18	0.333333
MMP9	203936_s_at				0.199865	0.225613	0.462957	0.580969	0.670863	0.652947	0.0348219	0.00679959	0.907887	0.136688	0.425483	0.0104654	0.00566437	0.00303395	0.598042	0.0384173	0.456928	0.0865232	6	18	0.333333
MS4A6A	219666_at				0.304534	0.228166	0.029244	0.559337	0.0863505	0.690592	0.0286677	0.0111907	0.0482572	0.961715	0.10303	0.00199204	0.00398827	0.919656	0.250755	0.158091	0.325634	0.620512	6	18	0.333333
MTDH	212251_at				0.0249267	0.36012	0.000466063	0.319493	0.0135362	0.510527	0.815329	0.536033	0.977977	0.559824	0.0310446	0.394304	0.343122	0.773001	0.00899692	0.0115642	0.880186	0.610223	6	18	0.333333
MTERFD1	219363_s_at				0.799671	0.458669	0.0305749	0.311975	0.659151	0.937355	0.00733545	0.0227842	0.0177388	0.582051	0.96304	0.716101	0.62244	0.266233	0.420055	0.0126983	0.730776	0.00292007	6	18	0.333333
NBN	202907_s_at				0.156708	0.854043	0.447924	0.62657	0.76811	0.486913	0.0435776	0.0299779	0.00782356	0.341217	0.00595183	0.96755	0.24147	0.0779294	0.0457179	0.458005	0.520069	0.040857	6	18	0.333333
NDRG2	206453_s_at				0.0414024	0.162968	0.0845172	0.030076	0.0260705	0.0335664	0.0954522	0.166639	0.977599	0.959103	0.51645	0.116319	0.0211256	0.716363	0.562505	0.000564159	0.187021	0.605327	6	18	0.333333
NIF3L1	218133_s_at				0.284348	0.313604	0.454789	0.072864	0.78498	0.214155	0.00593361	0.0185702	0.00332214	0.781775	0.530942	0.141036	0.0891898	0.107639	0.0335619	0.000543558	0.911803	0.0024096	6	18	0.333333
NOX4	219773_at				0.745334	0.739795	0.0982896	0.0403645	0.339088	0.00793114	0.627218	0.608234	0.0339835	0.136797	0.634417	0.0897048	0.0323994	0.0779541	0.0423694	0.0450438	0.560913	0.483386	6	18	0.333333
NPRL3	203289_s_at				0.00185921	0.00462497	0.00405949	0.072997	0.00731518	0.0328131	0.189991	0.621237	0.068462	0.614683	0.595747	0.16104	0.0845567	0.255177	0.2465	0.0499565	0.663655	0.956516	6	18	0.333333
NTS	206291_at				0.77667	0.806043	0.00822699	0.207775	0.0838375	0.751248	0.00960687	0.0410534	0.311911	0.0405225	0.39695	0.488762	0.525314	0.0946075	0.445188	0.0203034	0.835301	0.00895707	6	18	0.333333
NUP210	212315_s_at				0.0433577	0.0146724	0.00857618	0.174355	0.0163883	0.25383	0.139142	0.287992	0.0415725	0.956847	0.12038	0.482499	0.33266	0.108445	0.0495713	0.302713	0.661608	0.438114	6	18	0.333333
OSTM1	218196_at				0.704626	0.819044	0.323872	0.771105	0.00190904	0.0188037	0.244804	0.270523	0.00187898	0.214479	0.155873	0.31926	0.0207205	0.375184	0.0361754	0.748385	0.0372594	0.0697753	6	18	0.333333
P2RX6	211147_s_at				0.218885	0.418944	0.157201	0.457943	0.0345817	0.231043	0.032986	0.0168259	0.0179375	0.127078	0.0259312	0.186022	0.174397	0.0207067	0.828524	0.684916	0.221109	0.726591	6	18	0.333333
P2RY13	220005_at				0.411095	0.390203	0.0468067	0.0271483	0.392804	0.0864644	0.363116	0.176555	0.0179795	0.36243	0.122808	0.00804411	0.131426	0.0616729	0.0217506	0.0102014	0.178167	0.587434	6	18	0.333333
PAICS	201013_s_at				0.983218	0.382043	0.00425774	0.00370994	0.172958	0.117062	0.0101237	0.0391513	0.000795112	0.711796	0.485262	0.279944	0.624756	0.112201	0.0158753	0.915214	0.643773	0.0541094	6	18	0.333333
PAM	214620_x_at				0.068996	0.00867264	0.0253006	0.150627	0.913121	0.652208	0.0458632	0.421843	0.00210832	0.64431	0.197086	0.158997	0.00339738	0.246789	0.0414071	0.202138	0.813752	0.0501231	6	18	0.333333
PCCA	203860_at				0.97079	0.762066	0.00768124	0.0150945	0.562056	0.747097	0.0369032	0.0302145	0.152203	0.389576	0.190191	0.119932	0.483235	0.0347887	0.212016	0.926666	0.256531	0.0187558	6	18	0.333333
PDGFA	205463_s_at				0.00307187	0.0217139	0.0184438	0.889812	0.0651466	0.442685	0.198647	0.455716	0.608227	0.754086	0.974294	0.00168672	0.478737	0.0274114	0.880984	0.0201401	0.868368	0.971299	6	18	0.333333
PIK3CD	203879_at				0.213547	0.266879	0.0236664	0.0179234	0.124703	0.0488713	0.317712	0.376332	0.0380922	0.903795	0.482746	0.010763	0.00111622	0.242778	0.566774	0.703303	0.194355	0.145802	6	18	0.333333
PLD3	201050_at				0.0112785	0.0289269	0.633231	0.693972	0.984938	0.950147	0.212511	0.217242	0.340352	0.96058	0.247311	0.110093	0.0184814	0.28729	0.185703	0.000657495	0.00253536	0.00968854	6	18	0.333333
PMAIP1	204286_s_at				0.914166	0.934911	0.0100398	0.115714	0.00153235	0.034007	0.324452	0.653446	0.051845	0.0961666	0.854451	0.0101047	0.0420708	0.127012	0.342825	0.00954862	0.487172	0.377029	6	18	0.333333
POGLUT1	218587_s_at				0.526164	0.0205312	0.124436	0.727401	0.1339	0.23916	0.0897988	0.0497716	0.0777891	0.906438	0.459896	0.0067525	0.0220091	0.354125	0.660144	0.000157373	0.947338	0.00110574	6	18	0.333333
PPP1R1A	205478_at				0.0156956	0.0325681	0.0793544	0.658357	0.0181662	0.38098	0.117918	0.0175592	0.0465368	0.623493	0.685859	0.927498	0.654174	0.657337	0.0330149	0.798117	0.829764	0.447298	6	18	0.333333
PPP1R7	213465_s_at				0.684458	0.196649	0.0324559	0.0349258	0.823454	0.669039	0.882234	0.609216	5.5e-05	0.527307	0.156023	0.651015	0.0447131	0.209139	0.420689	0.0109586	0.0916419	0.00443323	6	18	0.333333
PPP3CC	32541_at	0.79707	0.0873404	0.00686239	0.697675	0.154809	0.36101	0.74794	0.149418	0.356509	0.0412411	0.0670195	0.0361023	0.324366	0.358297	0.00859657	0.00343449	0.0345717	0.110858	0.12265	0.0430818	0.0696006	7	21	0.333333
PRKCA	206923_at				0.759824	0.724643	0.0139988	0.203479	0.0621934	0.555714	0.46368	0.292675	0.0904977	0.0338314	0.332069	0.0243301	0.00892339	0.452819	0.00790956	0.0149174	0.722448	0.0557924	6	18	0.333333
PRR5	47069_at				0.654037	0.783077	0.0237958	0.0178938	0.0205498	0.0261052	0.373751	0.135659	0.280565	0.915573	0.0147704	0.895027	0.250165	0.0876357	0.609195	0.00555124	0.320424	0.735868	6	18	0.333333
PSME4	212222_at				0.916557	0.354499	0.439926	0.814372	0.00586621	0.0477853	0.0766516	0.118466	0.000534854	0.762203	0.854821	0.318411	0.451391	0.0143449	0.367709	0.000295492	0.431841	0.0196334	6	18	0.333333
PTCD3	217895_at				0.866556	0.538614	0.000727382	0.0756644	0.275403	0.981365	0.0140396	0.043904	0.00129629	0.136133	0.562936	0.83459	0.377941	0.368001	0.845811	0.0400646	0.742622	0.0092973	6	18	0.333333
PTGER4	204897_at				0.944514	0.478242	0.770423	0.844836	0.177887	0.407851	0.600646	0.472437	0.0424285	0.0096204	0.979017	0.0364167	0.000100647	0.335921	0.00733259	0.0203944	0.707586	0.141646	6	18	0.333333
PYCARD	221666_s_at				0.662681	0.974388	0.230943	0.323106	0.457181	0.709663	0.00238063	0.0452858	0.202047	0.571597	0.785001	0.00123567	0.00817855	0.0192161	0.689485	0.0832538	0.220264	0.00140673	6	18	0.333333
RAB22A	213405_at				0.194253	0.968785	0.77772	0.65125	0.626941	0.876231	0.427148	0.394002	0.011659	0.809638	0.0307201	0.00806485	0.00105471	0.0923574	0.102381	0.0172761	0.519896	0.0155376	6	18	0.333333
RAB7A	211960_s_at				0.597787	0.369509	0.444429	0.218846	0.0485504	0.0209008	0.199483	0.0979998	0.0861581	0.34747	0.248182	0.174706	0.00991137	0.00735139	0.0243792	0.0225862	0.632279	0.494695	6	18	0.333333
RAC2	213603_s_at				0.770053	0.176336	0.168758	0.0238221	0.536629	0.234262	0.660557	0.938625	0.00804574	0.355188	0.298598	0.00421833	0.0053151	0.0374639	0.169768	0.464535	0.112077	0.0042461	6	18	0.333333
RASA1	202677_at				0.567895	0.2205	0.0975394	0.763617	0.840107	0.468164	0.36909	0.0349351	0.0251921	0.476906	0.15081	0.858969	0.0717882	0.0484948	0.0246149	0.0362246	0.439187	0.0481884	6	18	0.333333
RBM47	218035_s_at				0.272753	0.0760856	0.130532	0.116838	0.00910196	0.10277	0.196394	0.732334	0.119017	0.957969	0.736075	0.0172366	0.00145845	0.00836378	0.629823	0.000498902	0.0248001	0.723979	6	18	0.333333
RHOT1	218323_at				0.171701	0.855631	0.57816	0.72118	0.311642	0.476472	0.317172	0.241618	0.0292189	0.00397972	0.0414305	0.0239979	0.957374	0.0495439	0.0106624	0.760907	0.108771	0.375517	6	18	0.333333
RIOK2	218535_s_at				0.146483	0.628958	0.103146	0.0265182	0.772884	0.140459	0.14884	0.0244896	0.00171728	0.8286	0.200436	0.319174	0.471963	0.403932	0.0176389	0.000656709	0.314666	0.00193999	6	18	0.333333
RNASE6	213566_at				0.55493	0.326052	0.0160887	0.173356	0.0988662	0.581292	0.08192	0.0118175	0.0138953	0.600095	0.103143	0.00176736	0.000828724	0.164198	0.0215536	0.355194	0.36093	0.20476	6	18	0.333333
RNF10	208632_at				0.920805	0.510868	0.0216822	0.173375	0.0192069	0.0975046	0.8853	0.533684	0.245109	0.351126	0.461486	0.0144682	0.0216199	0.055285	0.00804111	0.00848808	0.403955	0.442763	6	18	0.333333
RNF24	204669_s_at				0.623324	0.975564	0.000197321	0.04113	0.029431	0.259882	0.304399	0.243193	0.0451753	0.477131	0.24845	0.766799	0.47442	0.728573	0.395774	0.00497158	0.196797	0.00283958	6	18	0.333333
RP11-120B7.1	214003_x_at				0.365618	0.682151	0.00229589	0.336111	0.0411789	0.291293	0.931172	0.716614	0.888897	0.752579	0.726232	0.00635102	0.0100033	0.915582	0.624438	0.0177369	0.94362	0.0162753	6	18	0.333333
RP11-315C6.3	203376_at				0.386676	0.118608	0.315704	0.0190582	0.368297	0.0208207	0.0927204	0.138358	6.05e-05	0.349244	0.288908	0.220583	0.636821	0.142415	0.0479656	9.9e-05	0.0852635	0.0219609	6	18	0.333333
RP11-435I10.4	210859_x_at				0.0011625	0.00750201	0.265435	0.629793	0.906421	0.983283	0.033811	0.146355	0.0387558	0.93127	0.731283	0.514519	0.0105014	0.282919	0.220766	0.202097	0.18672	0.00565215	6	18	0.333333
RP13-362E11.2	216315_x_at				0.037156	0.89424	0.337234	0.727791	0.168052	0.904871	0.292423	0.621395	0.0112227	0.782938	0.896304	0.0266926	0.0222844	0.223168	0.00731529	0.0015329	0.38198	0.397318	6	18	0.333333
RPL37	200092_s_at				0.0919688	0.0136952	0.00258993	0.102566	0.0274755	0.179008	0.547799	0.55	0.852297	0.229246	0.915736	0.783518	0.00380003	0.115702	0.0339708	0.000198693	0.883255	0.197149	6	18	0.333333
RPN1	201011_at				0.00277009	0.0961042	0.0202093	0.0456525	0.0786875	0.101299	0.768831	0.344605	0.0192504	0.703431	0.748696	0.0295955	0.0784202	0.179682	0.88389	0.000148591	0.890973	0.202217	6	18	0.333333
RPS20	214003_x_at				0.365618	0.682151	0.00229589	0.336111	0.0411789	0.291293	0.931172	0.716614	0.888897	0.752579	0.726232	0.00635102	0.0100033	0.915582	0.624438	0.0177369	0.94362	0.0162753	6	18	0.333333
RRBP1	201204_s_at				0.35226	0.581097	0.00578468	0.229717	0.000860085	0.0401808	0.207714	0.435553	0.0302843	0.723736	0.178194	0.377813	0.334062	0.439774	0.536655	0.580226	0.0174566	0.023108	6	18	0.333333
S100PBP	218370_s_at				0.89378	0.196369	0.430917	0.886918	0.83427	0.643794	0.00978312	0.0204417	0.0149087	0.199745	0.379998	0.366659	0.0761117	0.0320578	0.667522	0.0361407	0.506815	0.00270514	6	18	0.333333
SCGB1D2	206799_at				0.382358	0.268415	0.0170649	0.00173136	0.759555	0.227412	0.000369388	0.00219056	0.0842412	0.305882	0.522224	0.149513	0.141062	0.0106534	0.142902	0.0400477	0.966864	0.362604	6	18	0.333333
SEC22A	218703_at				0.681823	0.908818	0.171065	0.907279	0.217661	0.89601	0.00927924	0.0166807	0.222209	0.319968	0.0483223	0.0759008	0.162308	0.0366278	0.0404626	0.065536	0.157049	0.0032979	6	18	0.333333
SEC63	201916_s_at				0.458314	0.416318	0.920075	0.814934	0.52397	0.65937	0.374549	0.149402	0.000288839	0.248055	0.230543	0.894355	0.0339857	0.0289434	0.0302517	0.376886	0.0488396	0.0022946	6	18	0.333333
SERPINB1	212268_at				0.939085	0.912242	0.387601	0.0257278	0.56297	0.229008	0.225676	0.717104	0.0257403	0.0218909	0.816457	0.0243086	0.00842783	0.0657444	0.029102	0.334258	0.773764	0.10361	6	18	0.333333
SESN1	218346_s_at				0.581329	0.0197191	0.207468	0.0221393	0.736773	0.294353	0.649889	0.114784	0.00977234	0.608724	0.993404	0.00225377	0.000799039	0.063633	0.0628988	0.0029235	0.246077	0.366569	6	18	0.333333
SHFM1	202276_at				0.560331	0.446225	0.0455276	0.692959	0.0315855	0.148237	0.941416	0.275997	0.420921	0.00739487	0.61226	0.583546	0.448636	0.0446478	0.021893	0.166479	0.977716	0.0484691	6	18	0.333333
SLC25A3	200030_s_at				0.234743	0.710991	0.838017	0.333005	0.211886	0.0683894	0.0245189	0.0134611	0.00351553	0.0323822	0.0386603	0.402522	0.641077	0.721174	0.0670795	0.0348706	0.287179	0.806534	6	18	0.333333
SLC35A3	206770_s_at				0.719248	0.275942	0.690149	0.686843	0.515136	0.584425	0.0324216	0.116054	0.0104433	0.417623	0.22451	0.125922	0.0433829	0.0350931	0.0240478	0.486512	0.0351165	0.0534993	6	18	0.333333
SLC39A7	202667_s_at				0.90439	0.32118	0.0115299	0.735647	0.00412296	0.101042	0.807498	0.905003	0.00891594	0.684266	0.712433	0.0429007	0.0211691	0.307478	0.381298	0.00684712	0.601994	0.0981113	6	18	0.333333
SLC47A1	219525_at				0.504836	0.40978	0.0371879	0.196164	0.827725	0.726595	0.0423694	0.0336545	0.00674191	0.441552	0.0566916	0.243563	0.0350443	0.724356	0.287675	0.865912	0.640024	0.0346371	6	18	0.333333
SLIT2	209897_s_at				0.888127	0.123754	0.186658	0.681453	0.720131	0.257016	0.00681414	0.0381734	0.00240449	0.125959	0.139809	0.0114299	0.000293878	0.597833	0.541443	0.471619	0.0471311	0.926339	6	18	0.333333
SMC3	209259_s_at				0.53661	0.647057	0.0471686	0.00784749	0.504547	0.227833	0.433229	0.237868	0.00106873	0.203481	0.250843	0.205384	0.16791	0.0497902	0.000929579	0.393296	0.0812725	0.0361272	6	18	0.333333
SNORD54	214003_x_at				0.365618	0.682151	0.00229589	0.336111	0.0411789	0.291293	0.931172	0.716614	0.888897	0.752579	0.726232	0.00635102	0.0100033	0.915582	0.624438	0.0177369	0.94362	0.0162753	6	18	0.333333
SOS1	212780_at				0.727827	0.846765	0.0354181	0.497401	0.293617	0.149097	0.102385	0.276888	0.0295923	0.0321612	0.262865	0.0465413	0.00853388	0.0958891	0.31345	0.818384	0.123728	0.0206034	6	18	0.333333
SP100	210985_s_at				0.0223249	0.895307	0.418068	0.0128896	0.349201	0.0287758	0.918798	0.575601	0.00208654	0.322254	0.523921	0.500565	0.964061	0.765604	0.140631	0.031266	0.489217	0.040412	6	18	0.333333
SPAG6	210033_s_at				0.558868	0.0185815	0.544821	0.245523	0.571661	0.0217641	0.0235369	0.0106824	0.170833	0.188969	0.201535	0.319602	0.09908	0.746115	0.338622	0.00766976	0.185039	0.0024419	6	18	0.333333
SPN	216981_x_at				0.755101	0.821984	0.0837801	0.388115	0.0125481	0.262867	0.00342881	0.0421113	0.0394281	0.153851	0.169737	0.343838	0.193132	0.357671	0.837817	0.0246295	0.555353	0.0166618	6	18	0.333333
SPOCK2	202523_s_at				0.0746445	0.174134	0.387636	0.579514	0.460503	0.294338	0.011347	0.0301441	0.00420414	0.121518	0.48058	0.291884	0.133079	0.789022	0.841392	0.0176768	0.00751202	0.0250586	6	18	0.333333
SREBF1	202308_at				0.126821	0.629735	0.135283	0.425558	0.00222672	0.0250144	0.0335933	0.402272	0.240747	0.774618	0.0267034	0.627633	0.231499	0.109336	0.362335	0.00836585	0.0428449	0.753795	6	18	0.333333
SRGAP3	209794_at				0.455791	0.423021	0.0917862	0.0401923	0.118527	0.0811339	0.0248689	0.00972468	0.074937	0.00488098	0.0211686	0.148944	0.00087956	0.868137	0.374483	0.262632	0.300917	0.212778	6	18	0.333333
ST20	217104_at				0.0162272	0.592074	0.00221397	0.0341308	0.23233	0.994889	0.0533887	0.134771	0.0176478	0.268096	0.0217959	0.210082	0.803599	0.241042	0.522729	0.0439511	0.962496	0.822061	6	18	0.333333
STAT3	208992_s_at				0.000646627	0.00335019	0.570343	0.331473	0.801599	0.380212	0.0629468	0.16462	0.127004	0.702768	0.747413	0.0304161	0.0230019	0.0817844	0.426739	0.00162328	0.717951	0.0168457	6	18	0.333333
STC2	203439_s_at				0.935137	0.659591	0.00909529	0.0156329	0.235538	0.153826	0.342923	0.798307	0.443491	0.0200802	0.636321	0.00198998	0.000840477	0.929134	0.0696794	0.778952	0.019348	0.354816	6	18	0.333333
STK10	203047_at				0.75731	0.463958	0.735272	0.0186952	0.477308	0.0186881	0.449797	0.0860884	0.52495	0.14482	0.567643	0.334557	0.0138421	0.0352702	0.455032	0.362948	0.0123295	0.0185432	6	18	0.333333
STK19	36019_at	0.971857	0.128176	0.0148976	0.247363	0.542629	0.0170561	0.672296	0.00776284	0.169425	0.177661	0.011292	0.563581	0.96653	0.020077	0.320821	0.06032	0.0250989	0.939969	0.259349	0.9873	0.0226555	7	21	0.333333
STK19P	36019_at	0.971857	0.128176	0.0148976	0.247363	0.542629	0.0170561	0.672296	0.00776284	0.169425	0.177661	0.011292	0.563581	0.96653	0.020077	0.320821	0.06032	0.0250989	0.939969	0.259349	0.9873	0.0226555	7	21	0.333333
STX3	209238_at				0.258798	0.142334	0.426015	0.0864405	0.199696	0.0448032	0.284719	0.116316	0.00654436	0.272316	0.243213	0.0392153	0.0169812	0.012819	0.4795	0.0174769	0.260214	0.945868	6	18	0.333333
STX6	212799_at				0.957357	0.35409	0.0597784	0.0419579	0.51261	0.0255488	0.292658	0.387125	0.0507864	0.784024	0.0641726	0.0231717	0.746585	0.019436	0.0299966	0.018139	0.155227	0.315863	6	18	0.333333
SUCLA2	202930_s_at				0.663866	0.30444	0.66481	0.320192	0.419171	0.042907	0.0358787	0.0369751	0.001028	0.620193	0.446762	0.205562	0.762731	0.0454144	0.0629512	0.946423	0.115099	0.00841449	6	18	0.333333
THY1	208850_s_at				0.126498	0.363008	0.102373	0.411782	0.0180715	0.0213406	0.00606329	0.023399	0.00642995	0.517458	0.343509	0.511184	0.127683	0.0280398	0.805679	0.467422	0.242583	0.209376	6	18	0.333333
TMED3	208837_at				0.633755	0.812618	0.0114266	0.959296	0.0172253	0.992912	0.0568994	0.00706165	0.00405316	0.480486	0.340149	0.0873549	0.0135568	0.250575	0.16853	0.0737021	0.927796	0.00700291	6	18	0.333333
TMEM131	212507_at				0.217302	0.170222	0.130125	0.0263376	0.743225	0.598275	2.86e-05	0.00249416	0.00801281	0.492746	0.214015	0.620837	0.0198462	0.458948	0.0269929	0.69718	0.435314	0.782555	6	18	0.333333
TMEM14A	218477_at				0.420284	0.689732	0.216896	0.197857	0.355089	0.577203	0.919821	0.588514	0.0175805	0.0279458	0.918028	0.0187788	0.0208185	0.0393884	0.0766988	0.747521	0.256074	0.0444341	6	18	0.333333
TMEM176B	220532_s_at				0.155918	0.0457449	0.920173	0.330944	0.750071	0.293273	0.0022576	0.00754442	0.200028	0.573303	0.0799953	0.0197224	0.00106938	0.281584	0.795354	0.484381	0.0300982	0.512938	6	18	0.333333
TMEM41B	212623_at				0.298518	0.427238	0.154237	0.0608213	0.360983	0.187136	0.0395102	0.0389935	0.00135671	0.488397	0.0353012	0.895719	0.0568173	0.397346	0.0295442	0.0126621	0.434188	0.0611573	6	18	0.333333
TNFAIP3	202644_s_at				0.620788	0.723607	0.0214897	0.0964448	0.139954	0.316665	0.330441	0.314317	0.408901	0.0270871	0.733393	0.0226758	0.0120637	0.520008	0.00188447	0.0054589	0.828768	0.360499	6	18	0.333333
TNFRSF1B	203508_at				0.0143419	0.0546797	0.00255031	0.00756925	0.116674	0.0707441	0.334287	0.418047	0.0016503	0.072627	0.918259	0.0655936	0.032519	0.561902	0.911878	0.300513	0.0274962	0.157463	6	18	0.333333
TRAK2	202125_s_at				0.785752	0.369859	0.0350625	0.0759858	0.0300191	0.0367473	0.227806	0.0586735	0.0375285	0.369499	0.125072	0.366342	0.269712	0.0827357	0.250443	0.0328836	0.193018	0.00703138	6	18	0.333333
TRMT61B	221229_s_at				0.979912	0.366278	0.00193513	0.206045	0.0887036	0.504631	0.0059227	0.00389192	0.0159622	0.441225	0.024153	0.644065	0.940119	0.0235127	0.13123	0.860233	0.128667	0.106892	6	18	0.333333
TUBA1A	209118_s_at				0.914994	0.864935	0.0182913	0.0293174	0.0143976	0.0598834	0.155099	0.156163	0.711034	0.0995777	0.525981	0.0171813	0.0188231	0.785362	0.059377	0.00785786	0.140573	0.0955548	6	18	0.333333
UBE2N	212751_at				0.0335243	0.665674	0.609207	0.545331	0.962298	0.975291	0.0257131	0.00887669	0.00117191	0.290962	0.0995843	0.513557	0.953117	0.0580365	0.0425891	0.0180661	0.167575	0.105286	6	18	0.333333
UBE2V1P3	216315_x_at				0.037156	0.89424	0.337234	0.727791	0.168052	0.904871	0.292423	0.621395	0.0112227	0.782938	0.896304	0.0266926	0.0222844	0.223168	0.00731529	0.0015329	0.38198	0.397318	6	18	0.333333
UBL3	201535_at				0.576108	0.0742792	0.63561	0.784362	0.790544	0.979414	0.0665042	0.0167454	0.00087884	0.503994	0.427494	0.691839	0.0164944	0.108174	0.0294253	0.544113	0.0263525	0.0322727	6	18	0.333333
UBTD1	219172_at				0.167661	0.630919	0.0269838	0.680004	0.0289398	0.225555	0.0203366	0.0891632	0.00588297	0.110118	0.360983	0.205757	0.0732119	0.0205212	0.839267	0.255471	0.429955	0.0261111	6	18	0.333333
VAV1	206219_s_at				0.101056	0.871311	0.00269088	0.0229748	0.0314953	0.017079	0.29476	0.207173	0.621812	0.315646	0.16689	0.00821398	0.00576571	0.0513524	0.277393	0.617545	0.358356	0.163776	6	18	0.333333
VMP1	220990_s_at				0.86279	0.534006	0.937155	0.873147	0.697373	0.655275	0.894399	0.304555	0.0102467	0.125409	0.543493	0.032495	0.0321624	0.0203042	0.0485987	0.0348048	0.965515	0.628883	6	18	0.333333
XXbac-BPG116M5.15	36019_at	0.971857	0.128176	0.0148976	0.247363	0.542629	0.0170561	0.672296	0.00776284	0.169425	0.177661	0.011292	0.563581	0.96653	0.020077	0.320821	0.06032	0.0250989	0.939969	0.259349	0.9873	0.0226555	7	21	0.333333
Z82188.1	213603_s_at				0.770053	0.176336	0.168758	0.0238221	0.536629	0.234262	0.660557	0.938625	0.00804574	0.355188	0.298598	0.00421833	0.0053151	0.0374639	0.169768	0.464535	0.112077	0.0042461	6	18	0.333333
ZFYVE9	204893_s_at				0.0883047	0.150049	0.0720422	0.235799	0.0290173	0.0487219	0.354286	0.255036	0.0306174	0.611643	0.332919	0.159943	0.543706	0.0308369	0.0142489	0.0379595	0.0540151	0.78181	6	18	0.333333
ZNF222	206175_x_at				0.00131626	0.364728	0.0117911	0.0211611	0.279478	0.0253679	0.569134	0.689245	0.390522	0.0405053	0.125964	0.138146	0.666679	0.341872	0.38211	0.000191798	0.514643	0.873716	6	18	0.333333
2012-03-01	235385_at				0.464563	0.550649	0.165469	0.0563796	0.313255	0.444488	0.392081	0.0419473		0.543491	0.0198825	0.0136423	0.0181766					0.575282	4	13	0.307692
2012-09-11	201307_at				0.510342	0.496937	0.121906	0.0222308	0.032678	0.00696365	0.893163	0.404246	0.00828984	0.271811	0.0625187	0.0847395	0.00016037	0.0760149		0.30213	0.113551	0.111164	5	17	0.294118
2012-09-08	208999_at				0.199829	0.877243	0.350909	0.0277589	0.174475	0.00986447	0.0339588	0.506491	0.210824	0.247948	0.36125	0.312708	0.0232963	0.0235582		0.284671	0.745379	0.48822	5	17	0.294118
AAED1	227534_at				0.309443	0.368477	0.142048	0.472244	0.0746502	0.157099	0.903204	0.0325314		0.161761	0.383192	0.0260535	0.0160523		0.0142369			0.877533	4	14	0.285714
ABI2	225098_at				0.562566	0.894926	0.223292	0.11408	0.0256972	0.0269982	0.0230079	0.121797		0.494252	0.503134	0.828291	0.0602359		0.29892			0.0393875	4	14	0.285714
AC006483.1	AFFX-HSAC07/X00351_3_at	0.421223	0.012976	0.00283703	0.736136	0.64245	0.183031	0.210052	0.184266	0.237626	0.0572939	0.0583007	0.544408	0.0778989	0.884133	0.0305652	0.0259054	0.824638	0.0892804	0.00268556	0.475913	0.00237754	6	21	0.285714
AC008865.1	225176_at				0.826296	0.83933	0.0191056	0.215913	0.0320171	0.130454	0.0852275	0.12848		0.973357	0.130117	0.0803931	0.00696169		0.0422396			0.0731782	4	14	0.285714
AC016722.2	230799_at				0.830074	0.421543	0.0351689	0.0162433	0.0208109	0.0643632	0.349979	0.41689		0.986141	0.795268	0.0799137	0.153072		0.0323404			0.352213	4	14	0.285714
AC016725.4	236387_at				0.789783	0.324485	0.0309292	0.417363	0.0465818	0.522201	0.41658	0.375429		0.679316	0.0141308	0.733962	0.00853344		0.822509			0.808081	4	14	0.285714
AC064852.4	244582_at				0.716658	0.745406	0.578924	0.219802	0.0414568	0.0229458	0.207929	0.0492712		0.874858	0.974527	0.254702	0.0282135		0.715741			0.0604715	4	14	0.285714
AC068491.1	225799_at				0.199364	0.306535	0.211377	0.724132	0.0348058	0.10612	0.0684613	0.0680976		0.0111813	0.592926	0.00161088	0.0013127		0.281336			0.589636	4	14	0.285714
AC090186.1	232382_s_at				0.025651	0.341528	0.00329237	0.0897711	0.0303211	0.470539	0.892303	0.389648		0.749654	0.489375	0.80123	0.0379387		0.309529			0.640803	4	14	0.285714
AC097658.1	1560382_at				0.165421	0.200944	0.690174	0.366136	0.382502	0.275499	0.00109004	0.00142643		0.235429	0.552338	0.0686858	0.0328092		0.483937			0.0413118	4	14	0.285714
AC114772.1	225522_at				0.737504	0.729283	0.507988	0.293231	0.0367449	0.013265	0.6167	0.771864		0.51575	0.0648909	0.939993	0.0905769		0.00331583			0.0192349	4	14	0.285714
AC135178.1	1559045_at				0.67813	0.113369	0.00207807	0.0306811	0.0103733	0.0563555	0.157485	0.0523051		0.073978	0.641088	0.0124146	0.200483		0.294947			0.725713	4	14	0.285714
ACTB	AFFX-HSAC07/X00351_3_at	0.421223	0.012976	0.00283703	0.736136	0.64245	0.183031	0.210052	0.184266	0.237626	0.0572939	0.0583007	0.544408	0.0778989	0.884133	0.0305652	0.0259054	0.824638	0.0892804	0.00268556	0.475913	0.00237754	6	21	0.285714
ADAM1	228925_at				0.490774	0.601039	0.565175	0.701121	0.649126	0.816971	0.0152702	0.00270998		0.298636	0.363223	0.193103	0.0446282		0.616595			0.00648309	4	14	0.285714
ADAMTS12	226997_at				0.784831	0.864923	0.207882	0.0274109	0.946159	0.477387	0.842847	0.426966		0.446144	0.0333101	0.0413153	0.000107198		0.0705237			0.2181	4	14	0.285714
ADAT3	1553968_a_at				0.0431724	0.223343	0.949604	0.627408	0.313796	0.228948	0.264186	0.166368		0.933902	0.877797	0.0483814	0.02267		0.386024			0.040428	4	14	0.285714
AEBP2	225889_at				0.314843	0.951767	0.549489	0.11772	0.183695	0.0178077	0.584667	0.642934		0.645503	0.962396	0.934828	0.0362127		0.0138145			0.00303588	4	14	0.285714
AGPAT3	225440_at				0.198879	0.0607161	0.0395768	0.244042	0.0176789	0.113581	0.788031	0.49964		0.376208	0.22794	0.0444458	0.0101604		0.288214			0.854665	4	14	0.285714
AGTRAP	225059_at				0.220813	0.0462874	0.74399	0.247009	0.0463594	0.0517716	0.986624	0.257705		0.679445	0.4992	0.0346039	0.732744		0.615864			0.000390224	4	14	0.285714
AL096869.5	1557657_a_at				0.0296021	0.800194	0.0161694	0.0378779	0.0122632	0.203453	0.474745	0.871612		0.175379	0.377828	0.838208	0.225444		0.516275			0.792464	4	14	0.285714
ALKBH8	235713_at				0.0276847	0.381653	0.0334546	0.68042	0.0981283	0.969621	0.360234	0.985259		0.98242	0.130843	0.664116	0.0492144		0.541169			0.0322068	4	14	0.285714
AMDHD1	229596_at				0.863158	0.115463	0.000345952	0.0341445	0.613677	0.582555	0.29826	0.168991		0.211075	0.0227435	0.532614	0.0206083		0.478875			0.212399	4	14	0.285714
ANKRD23	1553366_s_at				0.013934	0.00291863	0.0370421	0.686019	0.0721431	0.997512	0.133431	0.0387223		0.445299	0.139365	0.795573	0.0818886		0.243064			0.600705	4	14	0.285714
ANKRD39	1553366_s_at				0.013934	0.00291863	0.0370421	0.686019	0.0721431	0.997512	0.133431	0.0387223		0.445299	0.139365	0.795573	0.0818886		0.243064			0.600705	4	14	0.285714
ANKRD50	225731_at				0.833354	0.505102	0.228466	0.0813475	0.017559	0.0134508	0.996158	0.89967		0.194924	0.154166	0.0301307	0.010245		0.0983176			0.20064	4	14	0.285714
AP000892.1	222463_s_at				0.964081	0.570017	0.0113874	0.352569	0.0323618	0.458157	0.106344	0.0555062		0.188413	0.137279	0.340582	0.0406025		0.370809			0.0280966	4	14	0.285714
AP006222.2	1558529_s_at				0.327412	0.266772	0.467914	0.466853	0.741411	0.808873	0.273067	0.0264111		0.00940338	0.000250168	0.473666	0.926417		0.526549			0.0376366	4	14	0.285714
AQP3	39248_at	0.730064	0.90895	0.00354063	0.0417296	0.726628	0.016867	0.0387898	0.013841	0.0415172	0.420538	0.28138	0.411435	0.697563	0.945651	0.632106	0.061307	0.0827999	0.956922	0.0502274	0.945859	0.0701878	6	21	0.285714
ARHGAP21	224764_at				0.281048	0.0395448	0.446752	0.404175	0.613517	0.884788	0.165996	0.152507		0.938666	0.450887	0.0250457	0.0028765		0.0131999			0.134819	4	14	0.285714
ARHGAP27	227057_at				0.836937	0.890438	0.022879	0.375867	0.00141962	0.0184604	0.0592131	0.0407471		0.347119	0.582944	0.681675	0.263033		0.335393			0.082081	4	14	0.285714
ARHGAP9	232543_x_at				0.0919339	0.458186	0.810424	0.00319773	0.747584	0.040427	0.530821	0.470278		0.301733	0.347932	0.00864385	0.995421		0.950614			0.00637341	4	14	0.285714
ARRDC2	226055_at				0.746113	0.940614	0.021881	0.0100934	0.210006	0.0186006	0.634245	0.327269		0.508225	0.698638	0.117566	0.0193346		0.439552			0.120058	4	14	0.285714
ASH1L	222667_s_at				0.00855245	0.0806461	0.139725	0.445633	0.0450347	0.213506	0.434498	0.998706		0.321667	0.0213875	0.805581	0.098858		0.602763			0.00704973	4	14	0.285714
ASPH	242037_at				0.747701	0.694556	0.299647	0.673041	0.040833	0.689874	0.0876796	0.02616		0.221229	0.120032	0.000352697	0.00869335		0.603963			0.514485	4	14	0.285714
ATAD2B	1558807_at				0.248723	0.0482488	0.108716	0.18049	0.144729	0.0080019	0.461088	0.179955		0.021697	0.953744	0.0476619	0.747877		0.576639			0.913345	4	14	0.285714
ATL3	224893_at				0.471132	0.424727	0.693248	0.278631	0.386891	0.159199	0.838237	0.0805035		0.23085	0.219109	0.00895855	0.000346773		0.0471157			0.00365774	4	14	0.285714
BACE1	222463_s_at				0.964081	0.570017	0.0113874	0.352569	0.0323618	0.458157	0.106344	0.0555062		0.188413	0.137279	0.340582	0.0406025		0.370809			0.0280966	4	14	0.285714
BCAT1	225285_at				0.442113	0.189267	0.444616	0.15227	0.397853	0.0809058	0.0163686	0.516251		0.470448	0.0287983	0.0204069	0.00018139		0.12784			0.113892	4	14	0.285714
BCL11B	222895_s_at				0.0396103	0.669073	0.0871168	0.024416	0.269224	0.119916	0.612037	0.670278		0.393767	0.0138455	0.112355	0.207701		0.147544			0.0211181	4	14	0.285714
BICD1	231964_at				0.6505	0.144988	0.545373	0.573443	0.116797	0.932695	0.0402737	0.102945		0.911819	0.354703	0.0457424	0.00521567		0.864536			0.0358682	4	14	0.285714
BTLA	236226_at				0.866409	0.70129	0.139689	0.157168	0.936171	0.243343	0.00915432	0.02321		0.0100932	0.343765	0.0972397	0.389212		0.285484			0.0290923	4	14	0.285714
BTNL9	1553279_at				0.850344	0.633468	0.779479	0.0239738	0.89021	0.0082112	0.807459	0.773569		0.484335	0.0901217	0.0635236	0.0107807		0.14023			0.0241392	4	14	0.285714
C11orf46	226383_at				0.812921	0.342103	0.519336	0.503045	0.126507	0.758664	0.0360459	0.0420242		0.0749792	0.423416	0.942191	0.995908		0.00323865			0.00137354	4	14	0.285714
C11orf52	238805_at				0.0281793	0.0416082	0.28819	0.768383	0.80031	0.852925	0.560985	0.841595		0.427977	0.766274	0.0226677	0.0483663		0.888123			0.494608	4	14	0.285714
C14orf126	227158_at				0.0227834	0.516334	0.0637636	0.4	0.629132	0.905259	0.666398	0.451623		0.421487	0.276176	0.0821936	0.0413752		0.00963269			0.0196595	4	14	0.285714
C17orf56	239681_at				0.352903	0.422302	0.0353733	0.460898	0.0550225	0.432468	0.0334136	0.313853		0.31795	0.0398704	0.016613	0.192986		0.5917			0.996187	4	14	0.285714
C20orf141	1554042_s_at				0.938506	0.413451	0.0244364	0.0128558	0.164112	0.232712	0.025819	0.00471838		0.632769	0.948853	0.805974	0.713991		0.487987			0.490363	4	14	0.285714
C20orf151	236258_at				0.0232748	0.500031	0.0407067	0.493522	0.0168316	0.425526	0.933778	0.703151		0.166241	0.433379	0.958673	0.0317623		0.129262			0.187838	4	14	0.285714
C7orf59	224890_s_at				0.0292577	0.0020993	0.0422514	0.610632	0.0319792	0.851309	0.637103	0.243326		0.565192	0.572977	0.685744	0.177336		0.637501			0.0909251	4	14	0.285714
C9orf123	224860_at				0.397546	0.83885	0.334009	0.599657	0.260115	0.575201	0.0553136	0.0521995		0.337157	0.274186	0.0294859	0.0460949		0.0213834			0.000989491	4	14	0.285714
C9orf169	1569144_a_at				0.88768	0.68142	0.581547	0.486566	0.127457	0.234014	0.0416642	0.02751		0.314167	0.0391046	0.639169	0.0498563		0.282109			0.73709	4	14	0.285714
CAMK2D	224994_at				0.842776	0.162765	0.576404	0.578344	0.054048	0.0186378	0.0154854	0.0596528		0.456886	0.867646	0.655388	0.0139689		0.681794			0.00503713	4	14	0.285714
CAMKK1	223460_at				0.240311	0.00743689	0.869896	0.815156	0.743077	0.76152	0.0197374	0.0324904		0.619265	0.902275	0.256006	0.00437433		0.332685			0.280217	4	14	0.285714
CANX	238034_at				0.870214	0.971712	0.0763336	0.439577	0.0182538	0.128041	0.748835	0.436266		0.204268	0.519674	0.145	0.018046		0.0272175			0.000305369	4	14	0.285714
CAPRIN1	226285_at				0.875859	0.904642	0.00181146	0.00224654	0.0202351	0.00431732	0.689164	0.383082		0.944295	0.300394	0.994656	0.26244		0.227006			0.241301	4	14	0.285714
CASKIN1	1552689_at				0.00787975	0.63826	0.448567	0.124813	0.312909	0.0106039	0.000626593	0.00602758		0.765481	0.992011	0.304666	0.249733		0.0670981			0.479294	4	14	0.285714
CBR3-AS1	1559917_a_at				0.366107	0.175646	0.490612	0.403102	0.00710566	0.740759	0.335364	0.0222285		0.163772	0.76958	0.927149	0.0277012		0.531229			0.0419272	4	14	0.285714
CCDC168	1566665_at				0.913882	0.00816053	0.0983606	0.0277377	0.122841	0.00247231	0.15524	0.138261		0.266329	0.710403	0.0426488	0.485047		0.332622			0.693245	4	14	0.285714
CCDC50	235051_at				0.624842	0.597142	0.9589	0.263101	0.0362489	0.187838	0.00214426	0.00789677		0.540003	0.231088	0.0607011	0.710978		0.22736			0.0179873	4	14	0.285714
CCDC71L	226756_at				0.497253	0.881666	0.228017	0.464806	0.294587	0.522312	0.504906	0.797039		0.286444	0.432559	0.00661833	0.000788817		0.0100026			0.0272751	4	14	0.285714
CCDC80	243864_at				0.729896	0.406628	0.330267	0.55259	0.0822735	0.970502	0.0119413	0.0133807		0.954676	0.759493	0.00830623	0.000123911		0.0763764			0.520944	4	14	0.285714
CCNB3	231481_at				0.16319	0.0351282	0.768983	0.807116	0.00434068	0.0569527	0.375832	0.201417		0.0247191	0.942223	0.486865	0.891227		0.0417091			0.234616	4	14	0.285714
CD109	229900_at				0.153821	0.465472	0.000788318	0.00277779	0.0153971	0.0751352	0.259404	0.610784		0.122825	0.313796	0.0817063	0.00495145		0.8456			0.714698	4	14	0.285714
CD300LG	1552509_a_at				0.440827	0.492013	0.418923	0.0381545	0.362393	0.150043	0.283619	0.0853276		0.0469001	0.865575	0.0115192	0.0187065		0.980084			0.292801	4	14	0.285714
CDC42EP3	225685_at				0.10716	0.507794	0.163135	0.210463	0.033346	0.0642258	0.0201973	0.00690192		0.116633	0.594	0.0721413	0.272507		0.000661665			0.315981	4	14	0.285714
CDKN2B	236313_at				0.905159	0.532036	0.0179888	0.0345125	0.907578	0.887463	0.289362	0.508013		0.348538	0.0733523	0.0126609	0.00946231		0.147219			0.468948	4	14	0.285714
CGNL1	225817_at				0.666387	0.874643	0.0544074	0.0251225	0.0299882	0.545932	0.457939	0.359292		0.153229	0.569322	0.0447434	0.0348818		0.130527			0.835469	4	14	0.285714
CHD2	244443_at				0.332464	0.54333	0.0175823	0.148583	0.0235536	0.248431	0.0467789	0.169772		0.728001	0.0538064	0.213523	0.0228811		0.703264			0.249273	4	14	0.285714
CHMP3	222436_s_at				0.00722898	0.0324323	0.561014	0.946359	0.513135	0.60982	0.72155	0.46412		0.673627	0.312215	0.743845	0.0105698		0.0180093			0.685217	4	14	0.285714
CMKLR1	229121_at				0.116675	0.447337	0.0339048	0.0990994	0.0668479	0.614142	0.0203153	0.292514		0.546124	0.180956	0.0203102	0.0220396		0.106032			0.795044	4	14	0.285714
CMTM4	1554677_s_at				0.630122	0.952062	0.899441	0.424815	0.889628	0.160124	0.00538423	0.000380395		0.721401	0.0421371	0.713446	0.261151		0.165272			0.0337316	4	14	0.285714
CNOT6L	226153_s_at				0.738545	0.352609	0.478119	0.764113	0.924273	0.547368	0.0295123	0.200874		0.799362	0.01181	0.0948612	0.150156		0.0246286			0.0208852	4	14	0.285714
COL12A1	231879_at				0.297256	0.630256	0.0188679	0.865038	0.0272952	0.946467	0.156671	0.912563		0.639515	0.422506	0.0368776	0.000654338		0.0598505			0.461867	4	14	0.285714
COQ3	223515_s_at				0.661072	0.417808	0.489571	0.493695	0.825144	0.353354	0.0246805	0.000663318		0.832621	0.00895169	0.473225	0.170905		0.173784			0.0424973	4	14	0.285714
COX4I2	232761_at				0.914257	0.259539	0.0142933	0.442889	0.0473097	0.468341	0.268958	0.667867		0.468183	0.408902	0.409519	0.00926399		0.280008			0.0339189	4	14	0.285714
CP	228143_at				0.604207	0.0824982	0.321947	0.249407	0.0128224	0.0370673	0.440774	0.759002		0.0293358	0.700651	0.0352453	0.732709		0.231898			0.730915	4	14	0.285714
CPSF6	226934_at				0.0226859	0.924767	0.685004	0.880339	0.0300192	0.328817	0.939355	0.918393		0.723341	0.93981	0.762448	0.0155625		0.441175			0.0185305	4	14	0.285714
CRTAP	226656_at				0.748166	0.82426	0.000237159	0.120751	0.0114915	0.331477	0.152699	0.519633		0.33177	0.717457	0.0082874	0.00404285		0.278579			0.551351	4	14	0.285714
CSMD2	1570169_at				0.542439	0.405783	0.034401	0.276518	0.00384278	0.0751845	0.0161229	0.12358		0.944831	0.717985	0.3689	0.341736		0.831113			0.0144796	4	14	0.285714
CSRNP3	235018_at				0.181236	0.0484967	0.988436	0.00584892	0.0347116	0.131319	0.784523	0.382057		0.47064	0.492319	0.0156064	0.907588		0.756571			0.105879	4	14	0.285714
CTC-281B15.1	242585_at				0.85339	0.361343	0.460149	0.129916	0.74182	0.215403	0.0897601	0.0317503		0.0386965	0.0370356	0.559717	0.922637		0.0657455			0.0079804	4	14	0.285714
CTC-359D24.3	244406_at				0.594516	0.00822194	0.023071	0.515216	0.248251	0.397766	0.655194	0.4328		0.688769	0.0263665	0.386667	0.300317		0.0133177			0.0753082	4	14	0.285714
CTD-2006K23.1	1556748_x_at				0.890847	0.499135	0.1675	0.851796	0.7145	0.962668	0.0824932	0.0127895		0.767172	0.670672	0.0371817	0.0435818		0.877133			0.034373	4	14	0.285714
CTD-2192J16.17	242028_at				0.033341	0.493268	0.00564531	0.337523	0.099642	0.560498	0.814774	0.182065		0.331613	0.695697	0.938755	0.0819703		0.0281039			0.00306553	4	14	0.285714
CTD-2194D22.2	240817_at				0.587116	0.989737	0.504631	0.778405	0.0389897	0.369355	0.179019	0.0110836		0.0454689	0.710628	0.465983	0.884243		0.0197901			0.158334	4	14	0.285714
CTTNBP2NL	226000_at				0.867024	0.723639	0.951019	0.0440542	0.950893	0.0930891	0.325151	0.181785		0.905599	0.295517	0.244882	0.00140442		0.00366849			0.0331116	4	14	0.285714
CXCL2	1569203_at				0.541901	0.876412	0.782438	0.890706	0.286418	0.838331	0.0777079	0.0348192		0.0145593	0.678656	0.981678	0.0400675		0.0711733			0.0244596	4	14	0.285714
CYP1B1-AS1	1553829_at				0.0278643	0.495033	0.0141579	0.181105	0.0196561	0.0639807	0.24757	0.0113921		0.784841	0.924486	0.219863	0.258619		0.98268			0.544308	4	14	0.285714
CYP26B1	234721_s_at				0.495255	0.503216	0.573518	0.0710683	0.598669	0.0866745	0.00521861	0.0150438		0.369638	0.757507	0.0499838	0.00864276		0.26681			0.482642	4	14	0.285714
DAPP1	222858_s_at				0.306522	0.169317	0.00506372	0.00782655	0.0321686	0.0659655	0.855349	0.101558		0.41393	0.436684	0.0327035	0.179282		0.774942			0.648925	4	14	0.285714
DENND5B	228551_at				0.292351	0.699795	0.0197641	0.416989	0.218941	0.343697	0.00280551	0.073938		0.571708	0.0417035	0.557635	0.108514		0.0342765			0.13363	4	14	0.285714
DHTKD1	227094_at				0.60851	0.224965	0.00464198	0.00554044	0.460842	0.443407	0.0353981	0.10363		0.454337	0.0159109	0.0750253	0.919598		0.922648			0.368096	4	14	0.285714
DNAJC14	223420_at				0.0484588	0.627919	0.49143	0.699996	0.837793	0.548368	0.194942	0.239361		0.583111	0.49995	0.00235964	0.00605099		0.0316644			0.671796	4	14	0.285714
DNMT3A	244428_at				0.364392	0.549848	0.00637206	0.0117752	0.0243437	0.0099126	0.749396	0.977071		0.995633	0.292769	0.216611	0.860617		0.125398			0.82701	4	14	0.285714
DOCK5	230263_s_at				0.774541	0.0435596	0.0905279	0.69478	0.432393	0.0259494	0.0127162	0.696914		0.251262	0.899112	0.0830526	0.982049		0.45438			0.00818182	4	14	0.285714
DUSP15	230402_at				0.0477957	0.329907	0.247868	0.0349336	0.414341	0.0185629	0.580269	0.685805		0.239292	0.259517	0.888474	0.049539		0.472572			0.480387	4	14	0.285714
ECHDC1	223087_at				0.121792	0.648844	0.0666444	0.194658	0.740011	0.556917	0.036167	0.0298194		0.919888	0.411808	0.835246	0.567497		0.00524442			0.00186226	4	14	0.285714
EEPD1	225630_at				0.565128	0.403339	0.973951	0.196215	0.493302	0.153687	0.0305686	0.0499775		0.670128	0.00197498	0.868243	0.559035		0.0308355			0.331122	4	14	0.285714
EIF2AK3	241463_at				0.497252	0.956415	0.10736	0.124938	0.0186651	0.157647	0.0442857	0.00315938		0.336059	0.938679	0.621247	0.15164		0.0261755			0.462249	4	14	0.285714
EIF3F	230479_at				0.0459375	0.335031	0.0223309	0.2996	0.335402	0.663228	0.60196	0.646287		0.73295	0.519736	0.785609	0.70387		0.00233527			0.0336885	4	14	0.285714
EMC10	224727_at				0.00180546	0.041348	0.00302804	0.29113	0.0478637	0.127257	0.16554	0.249597		0.588164	0.267932	0.625386	0.874192		0.729154			0.751941	4	14	0.285714
EPB41L4A	228256_s_at				0.293638	0.834352	0.0901548	0.0155562	0.21071	0.0444032	0.116014	0.0371135		0.215056	0.22901	0.097907	0.901727		0.0179746			0.141243	4	14	0.285714
ERI1	226416_at				0.0680893	0.523221	0.875566	0.7975	0.610514	0.99593	0.791234	0.59644		0.0166889	0.297469	0.229942	0.00722649		0.0283024			0.0140508	4	14	0.285714
EXOC3	228847_at				0.0302156	0.0362664	0.710435	0.984122	0.941299	0.256218	0.567252	0.84851		0.980422	0.0663107	0.0358485	0.0175333		0.44349			0.87313	4	14	0.285714
FAM101B	226876_at				0.550971	0.945824	0.0159752	0.237792	0.0232778	0.18228	0.915508	0.800976		0.0439662	0.157591	0.0216299	0.110793		0.308299			0.782317	4	14	0.285714
FAM118B	223386_at				0.339623	0.439325	0.514893	0.351326	0.229723	0.835681	0.686543	0.548378		0.0397577	0.094765	0.040448	0.041508		0.0571927			0.0499769	4	14	0.285714
FAM220A	224452_s_at				0.877662	0.105507	0.938786	0.660586	0.200161	0.391787	0.00850689	0.0588345		0.379464	0.171534	0.0369477	0.0367344		0.0724793			0.0228793	4	14	0.285714
FAM41AY1	1561390_at				0.592999	0.995188	0.910864	0.277156	0.500355	0.0267076	0.0666068	0.0272496		0.239985	0.810411	0.0289821	0.028697		0.904171			0.654393	4	14	0.285714
FAM41AY2	1561390_at				0.592999	0.995188	0.910864	0.277156	0.500355	0.0267076	0.0666068	0.0272496		0.239985	0.810411	0.0289821	0.028697		0.904171			0.654393	4	14	0.285714
FAM73A	235125_x_at				0.61873	0.815286	0.0164603	0.0350911	0.276574	0.271457	0.0133387	0.0437589		0.161556	0.250981	0.635013	0.0821114		0.0869332			0.12279	4	14	0.285714
FAM76A	228604_at				0.00883627	0.729768	0.0613703	0.573257	0.13778	0.969656	0.0312908	0.10315		0.511424	0.305482	0.401718	0.0348701		0.452468			0.0439236	4	14	0.285714
FBXO22	225734_at				0.572689	0.7262	0.0548935	0.0307011	0.459089	0.493407	0.433504	0.497492		0.996198	0.0110041	0.560696	0.0770487		0.00177176			0.0410463	4	14	0.285714
FBXO4	223493_at				0.982889	0.926787	0.455181	0.0338102	0.17455	0.00560085	0.0910407	0.547675		0.903351	0.224723	0.802451	0.126234		0.0412234			0.0198861	4	14	0.285714
FCHSD1	226698_at				0.546946	0.901471	0.180535	0.367429	0.00402133	0.954156	0.0555348	0.0297631		0.619856	0.0277527	0.834157	0.414667		0.00757955			0.762868	4	14	0.285714
FCRL2	1563674_at				0.55376	0.289518	0.00477538	0.0232226	0.00813192	0.00936026	0.874607	0.877719		0.109752	0.557751	0.960311	0.696542		0.213467			0.178603	4	14	0.285714
FIGN	238964_at				0.338743	0.47813	0.0351757	0.682905	0.0451887	0.843111	0.195641	0.55566		0.189064	0.0285865	0.508481	0.0134827		0.942871			0.122483	4	14	0.285714
FKBP8	40850_at	0.800186	0.710222	0.0135036	0.0121808	0.163421	0.0325936	0.133871	0.463534	0.389523	0.121206	0.106736	0.116832	0.99337	0.0577169	0.821753	0.106319	0.26415	0.121995	0.00563262	0.0110401	0.0187209	6	21	0.285714
FOXP2	235201_at				0.0476142	0.0399538	0.231329	0.00488168	0.851436	0.0321641	0.330831	0.501285		0.228228	0.23024	0.0824243	0.166451		0.861714			0.461918	4	14	0.285714
FUBP3	239193_at				0.31869	0.0447143	0.0189579	0.788007	0.270316	0.682446	0.240731	0.241141		0.0263277	0.0304395	0.234189	0.463899		0.603459			0.171931	4	14	0.285714
FUNDC1	235346_at				0.493981	0.871736	0.656402	0.827472	0.566634	0.855846	0.00326894	0.0353616		0.441709	0.126803	0.0588781	0.0355039		0.0157357			0.064339	4	14	0.285714
GAB1	229114_at				0.399844	0.531142	0.228583	0.0776623	0.154821	0.0737693	0.0130869	0.0123586		0.21808	0.588152	0.0197644	0.248511		0.0201932			0.26868	4	14	0.285714
GABRB3	227830_at				0.735119	0.696969	0.0318417	0.0386393	0.146236	0.202286	0.0138677	0.282707		0.151997	0.687468	0.0181583	0.132015		0.696995			0.556479	4	14	0.285714
GAPT	1552386_at				0.145528	0.417553	0.376465	0.0418986	0.269468	0.00606235	0.808909	0.778109		0.322333	0.0332658	0.287122	0.0253915		0.741724			0.417741	4	14	0.285714
GCLM	234986_at				0.26372	0.951243	0.0338193	0.0716398	0.360723	0.530409	0.00244459	0.0109973		0.208057	0.144272	0.000834441	0.0930139		0.142661			0.646238	4	14	0.285714
GDAP1	226271_at				0.428614	0.228246	0.00530351	0.422188	0.00118889	0.298321	0.625777	0.7636		0.257459	0.52619	0.0173896	0.0307235		0.501116			0.51292	4	14	0.285714
GDNF	230090_at				0.810556	0.48178	0.0208488	0.079335	0.209131	0.650964	0.00332145	0.0252614		0.979174	0.0672749	0.854439	0.0139519		0.997898			0.983534	4	14	0.285714
GEMIN5	225712_at				0.0602436	0.13604	0.00592526	0.0335773	0.0550425	0.0753607	0.0993832	0.236663		0.62025	0.226799	0.29093	0.00463044		0.263093			0.0442796	4	14	0.285714
GLCCI1	225706_at				0.408735	0.282024	0.37881	0.384857	0.656545	0.643123	0.00531785	0.00946034		0.129266	0.504783	0.0132377	0.00468541		0.48821			0.146799	4	14	0.285714
GPR12	1559603_at				0.0693277	0.786516	0.0258735	0.435987	0.475664	0.72834	0.0346639	0.0182795		0.689534	0.771877	0.133958	0.0685172		0.0419484			0.672635	4	14	0.285714
GPRIN3	232687_at				0.977431	0.252475	0.0289982	0.0444536	0.986782	0.0001094	0.0712112	0.383757		0.753631	0.128938	0.179955	0.189642		0.0806037			0.00272169	4	14	0.285714
GS1-279B7.1	242226_at				0.208791	0.0277775	0.550451	0.876137	0.576023	0.82357	0.0404943	0.0262946		0.165417	0.800776	0.474048	0.666178		0.44008			0.0275603	4	14	0.285714
GS1-358P8.4	228959_at				0.113238	0.213284	0.0469121	0.561814	0.00091049	0.0288712	0.809453	0.544557		0.891984	0.580767	0.0726918	0.0399608		0.128933			0.725314	4	14	0.285714
GS1-465N13.1	230968_at				0.378574	0.563908	0.0228839	0.0458834	0.0760052	0.026328	0.420994	0.743732		0.503808	0.120457	0.0264402	0.329975		0.587458			0.974131	4	14	0.285714
GTPBP10	230684_at				0.0276149	0.228407	0.232289	0.864255	0.898294	0.541002	0.0146254	0.000150407		0.406794	0.277809	0.707128	0.542443		0.818497			0.027107	4	14	0.285714
H2AFJ	225245_x_at				0.917874	0.201793	9.1e-05	0.0476356	0.000961387	0.464317	0.249861	0.0698781		0.174992	0.64154	0.664255	0.183613		0.96243			0.000376252	4	14	0.285714
HAUS1	225297_at				0.870194	0.432856	0.234227	0.0743169	0.713713	0.256673	0.00432906	0.00515866		0.496027	0.215484	0.376602	0.834744		0.00304508			0.0309439	4	14	0.285714
HBM	240336_at				0.433804	0.232835	0.439324	0.0336447	0.389329	0.0391486	0.115508	0.0805184		0.0390623	0.337204	0.311307	0.162546		0.217573			0.010219	4	14	0.285714
HELB	1552788_a_at				0.394005	0.701608	0.982252	0.125958	0.466416	0.032081	0.194824	0.235337		0.971368	0.0465695	0.18446	0.012064		0.487785			0.00061424	4	14	0.285714
HNRNPH3	241996_at				0.00309011	0.888656	0.00353446	0.104509	0.0537029	0.0940491	0.966044	0.273053		0.108779	0.692042	0.230144	0.0351447		0.112353			0.01126	4	14	0.285714
HS6ST2	1552767_a_at				0.631612	0.92121	0.00509716	0.0447538	0.0236392	0.100108	0.605324	0.0907578		0.276555	0.343052	0.867179	0.0326752		0.760734			0.963904	4	14	0.285714
HSPB2-C11orf52	238805_at				0.0281793	0.0416082	0.28819	0.768383	0.80031	0.852925	0.560985	0.841595		0.427977	0.766274	0.0226677	0.0483663		0.888123			0.494608	4	14	0.285714
HTRA4	1553706_at				0.407044	0.847125	0.398224	0.730462	0.53853	0.805542	0.0251252	0.00956909		0.276122	0.302636	0.0197281	0.00971247		0.942211			0.147319	4	14	0.285714
INF2	224469_s_at				0.0196351	0.720388	0.0433252	0.481362	0.030621	0.623875	0.358405	0.646587		0.103976	0.562845	0.00667422	0.0523485		0.459691			0.980777	4	14	0.285714
INIP	223559_s_at				0.941412	0.285608	0.596794	0.269865	0.79904	0.250708	0.0752745	0.0245438		0.404521	0.34427	0.0454463	0.0440164		0.0088561			0.262873	4	14	0.285714
INO80	225357_s_at				0.0120366	0.0395757	0.547985	0.00250775	0.140375	0.00285851	0.636793	0.227818		0.923542	0.134448	0.235392	0.443886		0.222857			0.762715	4	14	0.285714
INO80D	227931_at				0.389035	0.937391	0.0855895	0.374425	0.0421135	0.322363	0.330868	0.620221		0.716478	0.0491342	0.804456	0.553023		0.0366664			0.000946281	4	14	0.285714
IPO11	222659_at				0.468391	0.303392	0.00206143	0.0490664	0.00630859	0.0561719	0.825924	0.498027		0.437302	0.340418	0.208128	0.0235724		0.152811			0.611435	4	14	0.285714
IRF2BPL	223474_at				0.134781	0.0329816	0.104955	0.290415	0.081696	0.30585	0.788711	0.964513		0.420114	0.881863	0.0553392	0.0080788		0.0324136			0.0288618	4	14	0.285714
ITPRIPL2	227792_at				0.661668	0.82723	0.045218	0.843188	0.016568	0.474909	0.744891	0.516475		0.833398	0.14284	0.041447	0.0712942		0.0499232			0.508093	4	14	0.285714
JAZF1	225798_at				0.398636	0.510814	0.508881	0.649432	0.0309532	0.028126	0.260681	0.600804		0.504852	0.173727	0.386494	0.0016149		0.0109573			0.280625	4	14	0.285714
KBTBD3	228777_at				0.92841	0.620884	0.030164	0.644707	0.359355	0.596509	0.0291174	0.0269086		0.726236	0.130279	0.757057	0.325654		0.198606			0.0433681	4	14	0.285714
KDM6B	41386_i_at	0.485463	0.298226	0.0132408	0.00399266	0.578864	0.0149724	0.365228	0.078006	0.654231	0.459157	0.352466	0.00360201	0.17347	0.310139	0.303253	0.163217	0.0444721	0.148546	0.559631	0.343905	0.0448952	6	21	0.285714
KHDC1	230055_at				0.00957983	0.121862	0.316325	0.544484	0.0483839	0.162325	0.051266	0.371448		0.703618	0.43791	0.0567391	0.0153077		0.088367			0.0416731	4	14	0.285714
KIAA1217	231807_at				0.202144	0.535525	0.790359	0.049311	0.404241	0.773535	0.41781	0.387714		0.171141	0.0297817	0.0409278	0.891819		0.0415429			0.727376	4	14	0.285714
KIAA1432	226221_at				0.228411	0.0294251	0.868891	0.511909	0.673853	0.886182	0.890108	0.0656123		0.0261354	0.0348992	0.90611	0.0435419		0.100287			0.498389	4	14	0.285714
KIAA1468	225506_at				0.224181	0.419656	0.000542593	0.165694	0.0453864	0.432335	0.261645	0.454281		0.876381	0.0976982	0.898911	0.0224545		0.805745			0.0451571	4	14	0.285714
KLF12	227261_at				0.200817	0.36542	0.000577589	0.0038522	0.366843	0.844993	0.115351	0.0870236		0.391578	0.334654	0.2297	0.011783		0.198267			0.0283068	4	14	0.285714
KLHL7	223250_at				0.819306	0.236791	0.0924983	0.161093	0.521035	0.595528	0.125003	0.016413		0.0406669	0.96314	0.592326	0.182372		0.014563			0.000521426	4	14	0.285714
LINC00152	225799_at				0.199364	0.306535	0.211377	0.724132	0.0348058	0.10612	0.0684613	0.0680976		0.0111813	0.592926	0.00161088	0.0013127		0.281336			0.589636	4	14	0.285714
LINGO3	1560439_at				0.674385	0.800099	0.860639	0.409461	0.660097	0.154396	0.00977172	0.000629791		0.34889	0.579277	0.293544	0.0125789		0.696457			0.0122494	4	14	0.285714
LINS	1554455_at				0.149456	0.637068	0.265068	0.587819	0.94518	0.513308	0.0453651	0.0449023		0.0471991	0.165041	0.978111	0.275668		0.146123			0.000107687	4	14	0.285714
LMBR1	224036_s_at				0.0698598	0.37903	0.610686	0.00807855	0.907054	0.10252	0.440996	0.0710447		0.620516	0.673709	0.361224	0.0225324		0.0495721			0.0095087	4	14	0.285714
LMBRD2	226779_at				0.964745	0.436649	0.234829	0.0903001	0.305705	0.511138	0.243855	0.216154		0.798415	0.0492985	0.452554	0.015079		0.00779697			0.00564335	4	14	0.285714
LRMP	240718_at				0.0296005	0.198164	0.0349114	0.314956	0.638169	0.2417	0.0592505	0.436427		0.0437496	0.415158	0.302349	0.630364		0.0368346			0.961709	4	14	0.285714
LSAMP-AS3	1558601_at				0.921	0.177275	0.0293653	0.824637	0.327201	0.248837	0.00492077	0.0510505		0.0479277	0.45882	0.631485	0.0458685		0.187325			0.828419	4	14	0.285714
LUZP1	1558173_a_at				0.0538995	0.576813	0.239957	0.126142	0.0598749	0.058759	0.956783	0.0383991		0.655491	0.0255961	0.718988	0.975308		0.00964087			0.0359913	4	14	0.285714
LYPD1	239650_at				0.00588036	0.0251107	0.698607	0.748012	0.457028	0.283577	0.0296305	0.552997		0.262401	0.156914	0.428715	0.0484554		0.0937041			0.0790339	4	14	0.285714
MAMDC4	229473_at				0.0456766	0.144046	0.689284	0.633941	0.2775	0.0083775	0.109264	0.0400393		0.366525	0.668269	0.145645	0.000861562		0.75526			0.704678	4	14	0.285714
MAML2	235457_at				0.920731	0.804037	0.0838558	0.0163682	0.373385	0.0621909	0.930324	0.829668		0.267811	0.893673	0.0216768	0.0387392		0.0419014			0.128568	4	14	0.285714
MAP9	228423_at				0.509413	0.55379	0.533157	0.875873	0.0163626	0.616092	0.937105	0.740008		0.358285	0.474731	0.297827	0.0175975		0.00375972			0.0168051	4	14	0.285714
MARK1	226653_at				0.317076	0.0889189	0.0469966	0.00541792	0.106847	0.00725493	0.752671	0.70798		0.871173	0.144451	0.151101	0.000947854		0.384817			0.939525	4	14	0.285714
MBNL3	229498_at				0.883993	0.0851688	0.637343	0.0998941	0.865022	0.20157	0.686668	0.272931		0.798148	0.00946643	0.0232572	0.00791969		0.11383			0.00501157	4	14	0.285714
MBTPS2	226760_at				0.825248	0.97391	0.245427	0.38846	0.799299	0.59967	0.116654	0.0216267		0.0283231	0.0180846	0.522476	0.558797		0.0589776			0.000550971	4	14	0.285714
MESDC2	224675_at				0.262513	0.599921	0.0411061	0.365064	0.0276906	0.396493	0.158601	0.0579956		0.687121	0.411596	0.156091	0.0731978		0.00358642			0.0281525	4	14	0.285714
METAP2	227993_at				0.573419	0.0349646	0.288051	0.343095	0.885193	0.937874	0.401302	0.13914		0.473535	0.182232	0.794965	0.00518458		0.00440617			0.0489091	4	14	0.285714
MIPEP	36830_at	0.576921	0.450317	0.0255408	0.725049	0.933604	0.00559347	0.285814	0.356494	0.690427	0.0126487	0.0398371	0.0430251	0.122748	0.141703	0.124026	0.0267874	0.40447	0.243322	0.0579144	0.542666	0.288151	6	21	0.285714
MOB3B	226844_at				0.254579	0.473372	0.155537	0.0322215	0.30818	0.0560124	0.284452	0.736356		0.935847	0.454265	0.0458551	0.02213		0.0182869			0.464144	4	14	0.285714
MPHOSPH8	225041_at				0.662586	0.755207	0.035254	0.661799	0.00428998	0.336009	0.295535	0.60568		0.469316	0.0429581	0.756424	0.0650459		0.0128022			0.877513	4	14	0.285714
MS4A7	223343_at				0.582597	0.283575	0.0474317	0.139575	0.0650411	0.181106	0.0470857	0.0981425		0.839601	0.895713	0.00939062	9.78e-06		0.0525835			0.192897	4	14	0.285714
MSANTD3	1552277_a_at				0.429753	0.735836	0.142451	0.792742	0.0319435	0.0458098	0.437325	0.341086		0.335449	0.0848408	0.357113	0.000899455		0.0236778			0.22724	4	14	0.285714
MXD3	225251_at				0.461308	0.611938	0.0630804	0.784719	0.097	0.466708	0.0169602	0.0147136		0.759927	0.179876	0.507832	0.0088646		0.0840124			0.0210373	4	14	0.285714
MYEF2	229464_at				0.0995446	0.514307	0.0354154	0.132179	0.000180406	0.00201353	0.300936	0.410368		0.477426	0.498301	0.0975658	0.0234439		0.989345			0.0558423	4	14	0.285714
NADKD1	229299_at				0.347212	0.370399	0.000346763	0.17252	0.177161	0.434565	0.0350256	0.0282206		0.422205	0.121805	0.518058	0.0124805		0.0538351			0.399976	4	14	0.285714
NCEH1	225847_at				0.19673	0.781204	0.953611	0.796356	0.0476337	0.0420449	0.277042	0.402687		0.855619	0.0879235	0.0880429	0.00124729		0.0223852			0.919288	4	14	0.285714
NCKAP5	239650_at				0.00588036	0.0251107	0.698607	0.748012	0.457028	0.283577	0.0296305	0.552997		0.262401	0.156914	0.428715	0.0484554		0.0937041			0.0790339	4	14	0.285714
NDFIP1	222423_at				0.755382	0.656683	0.235446	0.824969	0.21468	0.865217	0.503851	0.451028		0.0224551	0.527627	0.271955	0.0381663		0.0354344			0.0260411	4	14	0.285714
NDFIP2	224802_at				0.768183	0.429773	0.384994	0.360335	0.472041	0.479644	0.698097	0.400361		0.126617	0.0390407	0.0184873	0.809298		0.0172656			0.03064	4	14	0.285714
NEIL2	226585_at				0.177559	0.247414	0.0135582	0.0976571	0.0204238	0.0683728	0.345703	0.538926		0.437411	0.446108	0.0316337	0.00289839		0.879287			0.654456	4	14	0.285714
NEK6	223159_s_at				0.618346	0.179041	0.000811507	0.0816037	0.0181161	0.119433	0.924058	0.381993		0.103732	0.361704	0.00228074	0.000233652		0.534555			0.0519735	4	14	0.285714
NFIX	228278_at				0.251523	0.76732	0.00269537	0.0801821	0.00696868	0.171568	0.773804	0.780632		0.351212	0.0103541	0.822419	0.296799		0.166935			0.0419992	4	14	0.285714
NIN	225921_at				0.294823	0.0726539	0.0311871	0.0199674	0.194131	0.0894551	0.230021	0.895648		0.415864	0.241218	0.420991	0.0250133		0.00762873			0.28521	4	14	0.285714
NKIRAS1	225930_at				0.613266	0.397667	0.00535906	0.0416763	0.748893	0.826312	0.123387	0.012401		0.155737	0.0143634	0.11583	0.439436		0.150499			0.187608	4	14	0.285714
NLK	222589_at				0.825723	0.375313	0.270007	0.834961	0.377881	0.99987	0.627501	0.68548		0.62899	0.990175	0.0304423	0.00558829		0.0177221			0.0121184	4	14	0.285714
NLRP14	1553523_at				0.478578	0.535264	0.0254382	0.324087	0.894777	0.365364	0.0499222	0.0255559		0.959972	0.149387	0.0212708	0.485389		0.731559			0.683248	4	14	0.285714
NMD3	222497_x_at				0.736404	0.259052	0.0124804	0.072161	0.510081	0.658057	0.0609072	0.0327197		0.947907	0.583229	0.144417	0.915755		0.0405561			0.00728028	4	14	0.285714
NOL9	1554082_a_at				0.374257	0.554807	0.750398	0.0327557	0.186434	0.785933	0.654761	0.737501		0.63339	0.382414	0.0108372	0.0132091		0.420769			0.0137796	4	14	0.285714
NPL	223405_at				0.302128	0.0216156	0.737032	0.508569	0.136915	0.422814	0.501249	0.295261		0.657163	0.294631	0.0209424	9.64e-05		0.0427573			0.753841	4	14	0.285714
NUS1	225070_at				0.369941	0.0700205	0.0187775	0.0886412	0.263121	0.851897	0.016968	0.0205253		0.132599	0.778852	0.619263	0.432936		0.538793			0.0497809	4	14	0.285714
OIP5-AS1	225332_at				0.00725252	0.0688442	0.126358	0.22162	0.191754	0.38001	0.783714	0.565106		0.0250332	0.0189725	0.456393	0.383176		0.308119			0.0406369	4	14	0.285714
ORMDL3	223259_at				0.676775	0.425105	0.00190424	0.065138	0.00196671	0.0335541	0.385092	0.231104		0.499933	0.99631	0.0235441	0.149948		0.378726			0.366854	4	14	0.285714
OSBP2	239872_at				0.173539	0.595541	0.0222434	0.117463	0.0356673	0.0495193	0.44796	0.230215		0.326929	0.0632726	0.104773	0.0498025		0.940189			0.160153	4	14	0.285714
OTUD7B	1555139_a_at				0.0419134	0.354254	0.26572	0.861542	0.425051	0.765588	0.0449571	0.00745747		0.129813	0.29829	0.0105261	0.158207		0.715532			0.845963	4	14	0.285714
PACS2	1555823_at				0.0796757	0.235105	0.00855962	0.185461	0.00460421	0.159599	0.394483	0.0420286		0.549101	0.196409	0.864823	0.326495		0.457925			0.0186378	4	14	0.285714
PAPD4	225761_at				0.223526	0.632025	0.481422	0.536015	0.922988	0.838662	0.0245069	0.0450745		0.293293	0.244277	0.849174	0.00235758		0.175828			0.00596247	4	14	0.285714
PAPLN	226435_at				0.0418002	0.120926	0.106035	0.39992	0.390941	0.528843	0.270565	0.739724		0.409226	0.664065	0.102331	0.00321046		0.0242416			0.046314	4	14	0.285714
PAPPA2	228237_at				0.795016	0.841902	0.0217837	0.708445	0.0273578	0.41677	0.00296624	0.343874		0.950887	0.421661	0.162518	0.0721496		0.010194			0.0612086	4	14	0.285714
PARP10	226401_at				0.798877	0.20536	0.180485	0.489906	0.714653	0.618717	0.0423961	0.00575673		0.707251	0.0285863	0.971259	0.950908		0.201055			0.00872102	4	14	0.285714
PARP15	1553380_at				0.562645	0.840652	0.0443021	0.300598	0.0148534	0.0645478	0.610646	0.784678		0.457455	0.860216	0.421404	0.207198		0.00738897			0.0275753	4	14	0.285714
PCDHAC2	224539_s_at				0.169916	0.770925	0.0463992	0.200985	0.0141685	0.989927	0.0487736	0.0107462		0.25766	0.235963	0.499917	0.119151		0.0837235			0.607187	4	14	0.285714
PCDHB9	223927_at				0.840182	0.453576	0.0374828	0.30232	0.0053204	0.0400821	0.902375	0.107127		0.975829	0.191139	0.333675	0.702948		0.324868			0.0384928	4	14	0.285714
PDHA1	1555864_s_at				0.81457	0.626684	0.435895	0.421982	0.140519	0.0178171	0.118305	0.02439		0.54945	0.0347549	0.452877	0.59873		0.168664			0.0106152	4	14	0.285714
PGGT1B	235615_at				0.570411	0.489965	0.0328711	0.277475	0.047269	0.374635	0.360445	0.217927		0.798393	0.417185	0.321493	0.313109		0.00588025			0.0264416	4	14	0.285714
PGM2	223738_s_at				0.714769	0.809961	0.00796508	0.000306798	0.0652982	0.0141578	0.0612432	0.229372		0.787739	0.413299	0.105638	0.282025		0.0419928			0.201028	4	14	0.285714
PGM2L1	229553_at				0.583189	0.997333	0.224098	0.499984	0.190239	0.54193	0.939738	0.621042		0.382363	0.035096	0.158527	0.0495746		0.0317753			0.019976	4	14	0.285714
PNISR	225507_at				0.976958	0.78718	0.0202016	0.663435	0.0337386	0.749622	0.531595	0.959234		0.612569	0.0316665	0.632816	0.0175919		0.511094			0.797224	4	14	0.285714
PPARA	223437_at				0.0157459	0.268818	0.0289409	0.146826	0.900948	0.974407	0.00351578	0.0381221		0.900005	0.245465	0.0525806	0.239454		0.562718			0.230725	4	14	0.285714
PPP1R1C	1555462_at				0.54937	0.612521	0.0428216	0.0282399	0.472822	0.352877	0.0153298	0.00749929		0.926784	0.979649	0.510001	0.533034		0.430412			0.762079	4	14	0.285714
PRCP	242636_at				0.255693	0.0310112	0.601121	0.669988	0.976293	0.887368	0.291147	0.763044		0.0183334	0.812612	0.352129	0.0262816		0.000504794			0.834181	4	14	0.285714
PRDM15	236061_at				0.47168	0.543683	0.00763	0.0363145	0.0443412	0.240806	0.515075	0.517435		0.943329	0.373066	0.536305	0.194372		0.689915			0.0415111	4	14	0.285714
PRDX5	1560587_s_at				0.0475889	0.12595	0.00882211	0.270017	0.00297625	0.0982776	0.763233	0.460527		0.361993	0.356575	0.788854	0.0796714		0.0731359			0.0089037	4	14	0.285714
PRRG4	238513_at				0.5966	0.935788	0.8076	0.437461	0.562579	0.0363862	0.222229	0.427219		0.257641	0.943951	0.0357697	0.0197688		0.0233204			0.190331	4	14	0.285714
PYHIN1	240413_at				0.957422	0.0414838	0.217918	0.792942	0.0417242	0.37992	0.283457	0.780123		0.27947	0.643115	0.400775	0.0106296		0.00587783			0.227269	4	14	0.285714
RAB24	225251_at				0.461308	0.611938	0.0630804	0.784719	0.097	0.466708	0.0169602	0.0147136		0.759927	0.179876	0.507832	0.0088646		0.0840124			0.0210373	4	14	0.285714
RAP2A	225585_at				0.637949	0.762152	0.705674	0.975154	0.0412873	0.00450992	0.413057	0.217024		0.160162	0.5008	0.00920928	0.00578412		0.543975			0.147722	4	14	0.285714
RASSF6	229147_at				0.793741	0.938633	0.0745482	0.0125303	0.0220284	0.0232087	0.081522	0.486668		0.191845	0.270391	0.497609	0.0652067		0.153846			0.00425291	4	14	0.285714
RASSF7	40359_at	0.367429	0.728316	0.00675252	0.235974	0.0738365	0.9465	0.955732	0.0826338	0.299409	0.0379655	0.0060305	0.0165659	0.297724	0.611852	0.343637	0.420886	0.0724395	0.169435	0.0144408	0.211606	0.0349071	6	21	0.285714
RBPMS	231961_at				0.62136	0.355562	0.0226118	0.0231109	0.0934006	0.0293002	0.69901	0.838645		0.0261577	0.413537	0.439723	0.789543		0.696412			0.392979	4	14	0.285714
RECQL5	34063_at	0.497401	0.012141	3.89e-05	0.166032	0.850244	0.239358	0.1955	0.0446952	0.0797061	0.0848135	0.00683805	0.0154544	0.947326	0.129459	0.592806	0.442077	0.316053	0.711472	0.835449	0.808849	0.00568712	6	21	0.285714
RFX3	230403_at				0.758642	0.472575	0.125853	0.147006	0.254607	0.128662	0.0488637	0.0202101		0.165682	0.14574	0.469838	0.00945352		0.995123			0.041513	4	14	0.285714
RG9MTD1	223267_at				0.960266	0.866696	0.00692592	0.0376835	0.394985	0.407725	0.125673	0.016443		0.242005	0.520119	0.713935	0.866387		0.367696			0.0375441	4	14	0.285714
RP11-125M16.1	1561565_at				0.500349	0.0623723	0.400413	0.0140162	0.251273	0.0239749	0.576761	0.883123		0.274654	0.0224798	0.342875	0.809861		0.0176475			0.284799	4	14	0.285714
RP11-157G21.2	225041_at				0.662586	0.755207	0.035254	0.661799	0.00428998	0.336009	0.295535	0.60568		0.469316	0.0429581	0.756424	0.0650459		0.0128022			0.877513	4	14	0.285714
RP11-171A24.2	1569858_at				0.829776	0.995402	0.00826505	0.263584	0.00470671	0.0874588	0.00804645	0.233297		0.897981	0.862489	0.0350089	0.055368		0.825045			0.447562	4	14	0.285714
RP11-171N4.2	243892_at				0.728907	0.614749	0.253882	0.631034	0.0924826	0.234164	0.0116209	0.00254081		0.388082	0.972881	0.025432	0.0661358		0.0113989			0.0736929	4	14	0.285714
RP11-276H1.3	1564327_at				0.729556	0.274191	0.0415279	0.0313706	0.0247653	0.0224489	0.791412	0.55035		0.254565	0.238727	0.6187	0.325248		0.631448			0.133157	4	14	0.285714
RP11-296E7.1	224764_at				0.281048	0.0395448	0.446752	0.404175	0.613517	0.884788	0.165996	0.152507		0.938666	0.450887	0.0250457	0.0028765		0.0131999			0.134819	4	14	0.285714
RP11-392O18.1	225561_at				0.634554	0.222931	0.815342	0.272952	0.188639	0.697608	0.0380835	0.111615		0.467186	0.806904	0.557663	0.0477403		0.0141168			0.00398194	4	14	0.285714
RP11-473I1.10	225199_at				0.543154	0.184169	0.805742	0.46701	0.0304506	0.164972	0.206585	0.312934		0.804595	0.721886	0.0407709	0.0192386		0.0427871			0.964879	4	14	0.285714
RP11-480A16.1	1556103_at				0.407164	0.24889	0.0113004	0.128779	0.265709	0.854708	0.00235932	0.000928639		0.547941	0.953773	0.509282	0.878732		0.0449137			0.631846	4	14	0.285714
RP11-554A11.6	1560496_at				0.114264	0.133767	0.0481661	0.435717	0.0260642	0.218491	0.23977	0.0184132		0.028736	0.528717	0.398586	0.105946		0.341045			0.712029	4	14	0.285714
RP11-557H15.2	237731_at				0.184862	0.017077	0.383468	0.568689	0.0241801	0.141851	0.173469	0.139796		0.110343	0.315677	0.0184912	0.0426937		0.290803			0.25665	4	14	0.285714
RP11-588K22.2	227235_at				0.981586	0.761874	0.792796	0.0165668	0.411492	0.00587789	0.140483	0.047918		0.985115	0.858787	0.181025	0.497571		0.0154752			0.162837	4	14	0.285714
RP11-611D20.2	1559765_a_at				0.23302	0.838641	0.0350761	0.775376	0.00210415	0.00302923	0.0708118	0.255168		0.580844	0.514539	0.379864	0.0259209		0.341782			0.166541	4	14	0.285714
RP11-61A14.3	226855_at				0.367345	0.376408	0.00872453	0.0141186	0.12375	0.227223	0.00504033	0.00530782		0.7162	0.493604	0.208045	0.743098		0.172034			0.072237	4	14	0.285714
RP1-170O19.17	240624_x_at				0.0538216	0.0416371	0.165519	0.938099	0.00585018	0.174407	0.0429728	0.398862		0.878152	0.0918941	0.0216701	0.730541		0.907909			0.875556	4	14	0.285714
RP11-742B18.1	237682_at				0.256182	0.65608	0.0384396	0.790378	0.00304855	0.337438	0.220965	0.0148949		0.153186	0.972865	0.0557471	0.692227		0.379456			0.00191347	4	14	0.285714
RP11-752G15.6	228930_at				0.196094	0.519697	0.00237271	0.0429941	0.0181508	0.36499	0.469728	0.957502		0.159907	0.438977	0.541562	0.298186		0.30857			0.00311225	4	14	0.285714
RP11-933H2.4	1561348_at				0.623979	0.0490934	0.0399435	0.73027	0.193223	0.0390075	0.285719	0.0101174		0.212656	0.474538	0.495005	0.629138		0.49548			0.401304	4	14	0.285714
RP4-594L9.2	237574_at				0.634438	0.971632	0.776862	0.588638	0.905309	0.677047	0.00775393	0.00744563		0.416985	0.966095	0.26279	0.0421623		0.434047			0.00179257	4	14	0.285714
RP4-659J6.2	232579_at				0.429433	0.650853	0.186627	0.0489654	0.129182	0.0653061	0.0401422	0.0507512		0.0199188	0.117463	0.1926	0.0190895		0.402414			0.196796	4	14	0.285714
RP4-717I23.3	227074_at				0.984269	0.343088	0.152658	0.207166	0.0157193	0.0358128	0.632372	0.00471508		0.0190304	0.814902	0.319429	0.64801		0.537794			0.106693	4	14	0.285714
RP5-1121A15.1	236967_at				0.186484	0.423911	0.0479038	0.920649	0.0533113	0.989358	0.226065	0.166086		0.330043	0.368247	0.0258359	0.000656535		0.470378			0.0108573	4	14	0.285714
RP5-1166H10.2	1557557_at				0.551539	0.854165	0.988518	0.00431685	0.832381	0.00892027	0.000918751	0.087397		0.0351944	0.655652	0.157423	0.705265		0.975152			0.963578	4	14	0.285714
RPL27A	223707_at				0.609466	0.727195	0.00762513	0.0328624	0.0706967	0.214727	0.960681	0.905081		0.0311815	0.732419	0.023441	0.750499		0.242716			0.930823	4	14	0.285714
RPP30	1556061_at				0.618133	0.814512	0.744303	0.502561	0.963175	0.649863	0.0171097	0.039625		0.487174	0.193914	0.677192	0.280675		0.0427409			0.044152	4	14	0.285714
RTCA	238087_at				0.0253343	0.791246	0.661891	0.691873	0.122581	0.741948	0.0306556	0.0139943		0.780648	0.00249876	0.410869	0.812808		0.266351			0.55329	4	14	0.285714
SCARNA15	228930_at				0.196094	0.519697	0.00237271	0.0429941	0.0181508	0.36499	0.469728	0.957502		0.159907	0.438977	0.541562	0.298186		0.30857			0.00311225	4	14	0.285714
SET	40189_at	0.851565	0.0089116	5.96e-05	0.739191	0.184994	0.858851	0.916676	0.535381	0.580419	0.125891	0.368665	0.00545128	0.734385	0.200698	0.77546	0.673765	0.721856	0.014626	0.0224533	0.201554	0.0283867	6	21	0.285714
SGPP1	223391_at				0.864989	0.539892	0.197934	0.54385	0.138852	0.240702	0.583319	0.512042		0.649214	0.195195	0.0468446	0.0208925		0.00185569			0.00703701	4	14	0.285714
SHMT1	224954_at				0.0404486	0.566285	0.146695	0.111378	0.00140292	0.00368852	0.929448	0.96575		0.975755	0.108323	0.072474	0.0321595		0.41782			0.104821	4	14	0.285714
SHROOM3	228400_at				0.235826	0.133774	0.0158611	0.616967	0.00617803	0.236188	0.458324	0.506655		0.0418933	0.524028	0.155646	0.546821		0.0412522			0.967714	4	14	0.285714
SHROOM4	232404_at				0.508109	0.36478	0.955722	0.757129	0.881855	0.580023	0.046849	0.038864		0.42779	0.988673	0.0329147	0.0542989		0.364803			0.0272817	4	14	0.285714
SIRPB2	1559034_at				0.67519	0.125631	0.15406	0.00106218	0.0438265	0.00975619	0.0282929	0.0683914		0.788418	0.140449	0.0946021	0.369795		0.897034			0.374358	4	14	0.285714
SLC13A3	231217_at				0.711435	0.750814	0.00079417	0.0417873	0.0292066	0.680814	0.0603473	0.0114594		0.110953	0.672741	0.242792	0.21663		0.776042			0.987643	4	14	0.285714
SLC25A30	226782_at				0.10537	0.797562	0.736821	0.306421	0.204157	0.105762	0.110404	0.0269302		0.58582	0.0551901	0.0259994	0.2466		0.0392547			0.0471673	4	14	0.285714
SLC25A42	242274_x_at				0.48209	0.346623	0.136154	0.282097	0.291844	0.0251887	0.0271768	0.0107644		0.750606	0.946897	0.41983	0.37002		0.379175			0.0396687	4	14	0.285714
SLC35F5	225872_at				0.945403	0.428063	0.0710994	0.736204	0.998727	0.236072	0.00333566	0.014329		0.545987	0.593369	0.50111	0.0280822		0.0228679			0.193485	4	14	0.285714
SLC35G1	239265_at				0.238009	0.759063	0.113545	0.484701	0.0280452	0.135553	0.593524	0.285801		0.212674	0.97895	0.0171566	0.0243614		0.0460099			0.840886	4	14	0.285714
SLC40A1	223044_at				0.199791	0.0800155	0.840564	0.550236	0.232705	0.745495	0.00150616	0.032352		0.415837	0.895706	0.071485	0.0264192		0.0219241			0.814471	4	14	0.285714
SLC4A8	1554113_a_at				0.0814068	0.720057	0.441985	0.690195	0.0330027	0.485508	0.0121676	0.00789794		0.880654	0.213025	0.417111	0.299509		0.860031			0.0470413	4	14	0.285714
SLC4A9	233183_at				0.735836	0.33148	0.00450147	0.394561	0.00520984	0.0868731	0.192092	0.11533		0.0673206	0.787792	0.840396	0.0217995		0.614287			0.0102349	4	14	0.285714
SMARCAD1	223197_s_at				0.369197	0.124539	0.413287	0.430676	0.524386	0.484726	0.0223497	0.000972031		0.0475091	0.152151	0.990734	0.115408		0.454728			0.00905918	4	14	0.285714
SMARCE1	236016_at				0.356815	0.23933	0.160159	0.921994	0.397709	0.595768	0.043583	0.0169298		0.788141	0.942567	0.0161749	0.00263517		0.660256			0.374625	4	14	0.285714
SNX18	226683_at				0.213468	0.84765	0.225959	0.271024	0.0318107	0.0253969	0.73295	0.343613		0.524218	0.0669038	0.0957266	0.00855655		0.0119183			0.810756	4	14	0.285714
SP4	236265_at				0.738672	0.373717	0.0173777	0.0122067	0.327393	0.0723356	0.362499	0.633567		0.788463	0.877817	0.0906002	0.533028		0.0453989			0.0106313	4	14	0.285714
SPPL2B	225248_at				0.869398	0.0262276	0.0280001	0.017139	0.051574	0.0213843	0.0742834	0.223709		0.264024	0.73051	0.401129	0.544703		0.422209			0.616157	4	14	0.285714
SPSB1	226075_at				0.14464	0.25579	0.022138	0.0103807	0.195071	0.0360847	0.140761	0.234252		0.855484	0.672422	0.799398	0.0592757		0.0241263			0.85148	4	14	0.285714
SRFBP1	241734_at				0.0808088	0.761705	0.139126	0.0385046	0.960191	0.416425	0.00183701	0.0104277		0.805997	0.472236	0.0602348	0.731123		0.0553047			0.0104055	4	14	0.285714
STK17B	226525_at				0.665266	0.357434	0.178086	0.0415788	0.646631	0.136596	0.415449	0.51919		0.671687	0.399568	0.006953	5.06e-05		0.000812868			0.345472	4	14	0.285714
STRBP	223245_at				0.21121	0.906576	0.0375519	0.108563	0.0099737	0.0208418	0.888354	0.419684		0.552045	0.650323	0.894695	0.0497309		0.627346			0.0702308	4	14	0.285714
STRN	242989_at				0.393588	0.681137	0.192868	0.160482	0.0169907	0.0998847	0.0280636	0.0449307		0.228851	0.410088	0.734125	0.125489		0.94012			0.0074665	4	14	0.285714
SUV420H1	222566_at				0.214326	0.131545	0.0152272	0.00688458	0.2037	0.0910504	0.0673602	0.0295897		0.306715	0.703412	0.559146	0.349425		0.850348			0.0395419	4	14	0.285714
TAF1D	222728_s_at				0.403872	0.497799	0.00222716	0.382538	0.00303564	0.366271	0.336518	0.666495		0.29976	0.0486823	0.221764	0.827301		0.03264			0.601162	4	14	0.285714
TAOK1	227454_at				0.617689	0.594074	0.345278	0.967261	0.058018	0.212394	0.629372	0.613442		0.87959	0.021246	0.748059	0.00484114		0.012388			0.0495619	4	14	0.285714
TBC1D16	1558066_s_at				0.0296813	0.282149	0.263229	0.377691	0.503058	0.166789	0.00730649	0.00497474		0.2023	0.658769	0.525485	0.741764		0.233684			0.0137301	4	14	0.285714
TBCEL	227395_at				0.785738	0.379718	0.678053	0.118491	0.499534	0.290961	0.00939731	0.0272294		0.838714	0.259939	0.218083	0.129852		0.0411164			0.0112691	4	14	0.285714
TDRD3	1569069_s_at				0.0308504	0.477069	0.471735	0.137006	0.270197	0.0474547	0.0204343	0.0568456		0.303499	0.419861	0.558033	0.0529477		0.492566			0.000123199	4	14	0.285714
TDRD9	228285_at				0.628857	0.986096	0.00916283	0.0634539	0.096275	0.0739352	0.0475283	0.245639		0.406104	0.0273872	0.0896859	0.00454982		0.377748			0.67786	4	14	0.285714
THEM4	1553118_at				0.732549	0.00624997	0.0406239	0.0471146	0.336045	0.218352	0.509567	0.985447		0.142472	0.00770724	0.908772	0.682126		0.121162			0.279938	4	14	0.285714
TIMM21	223180_s_at				0.444151	0.345759	0.782462	0.354775	0.477991	0.0545769	0.0161269	0.00932626		0.226541	0.13918	0.710572	0.781688		0.00194116			0.0272959	4	14	0.285714
TM2D2	224413_s_at				0.730159	0.691301	0.0787756	0.99597	0.0193713	0.590506	0.492074	0.493916		0.948332	0.00300891	0.557371	0.036996		0.256357			0.0147117	4	14	0.285714
TMC8	227353_at				0.675165	0.0336372	0.00748823	0.000977224	0.657854	0.0375017	0.467718	0.551779		0.564968	0.426167	0.733051	0.303046		0.527098			0.847799	4	14	0.285714
TMCC1	227112_at				0.11963	0.67756	0.819067	0.024881	0.201456	0.656074	0.223987	0.149786		0.800412	0.0437257	0.0254783	0.000709531		0.218781			0.712971	4	14	0.285714
TMCO3	226050_at				0.739627	0.212224	0.41454	0.964189	0.00790943	0.0146175	0.547136	0.491721		0.607625	0.341649	0.0203536	0.0241656		0.293996			0.467279	4	14	0.285714
TMEM239	1554042_s_at				0.938506	0.413451	0.0244364	0.0128558	0.164112	0.232712	0.025819	0.00471838		0.632769	0.948853	0.805974	0.713991		0.487987			0.490363	4	14	0.285714
TMEM87B	225412_at				0.167179	0.536072	0.00258915	0.0516686	0.000920679	0.0722649	0.916828	0.973093		0.904823	0.270748	0.777897	0.0395291		0.0296452			0.929934	4	14	0.285714
TNRC6A	224705_s_at				0.388802	0.663086	0.313336	0.505173	0.758098	0.798999	0.041306	0.0187011		0.285981	0.356483	0.657914	0.0475855		0.241208			0.0141918	4	14	0.285714
TRAM1L1	244334_at				0.374659	0.75767	0.0338387	0.221466	0.0387543	0.361576	0.569203	0.671265		0.631767	0.150169	0.0498523	0.0494811		0.657425			0.55544	4	14	0.285714
TRERF1	238520_at				0.638776	0.0434282	0.412968	0.457889	0.474054	0.279196	0.650052	0.530667		0.435004	0.252335	0.0111214	0.0639475		0.0314495			0.0133856	4	14	0.285714
TRIM6	223599_at				0.366123	0.437988	0.0337948	0.330426	0.00506748	0.434735	0.86925	0.6995		0.518744	0.085317	0.017027	0.00114866		0.146923			0.411105	4	14	0.285714
TRIM7	223694_at				0.16135	0.102383	0.0033154	0.188866	0.0158619	0.568134	0.359586	0.533265		0.782799	0.380984	0.0165005	0.0868		0.160746			0.00399292	4	14	0.285714
TRPS1	222651_s_at				0.496232	0.999803	0.02656	0.612578	0.0400597	0.392388	0.626449	0.39536		0.214552	0.197874	0.797446	0.0162889		0.776253			0.00780668	4	14	0.285714
TSHZ2	243940_at				0.0302371	0.311875	0.923498	0.911193	0.550539	0.897934	0.0409023	0.282985		0.102162	0.438187	0.0111089	0.0272775		0.995615			0.151205	4	14	0.285714
TTBK2	1554295_x_at				0.346629	0.137491	0.0325779	0.0139099	0.177548	0.0801611	0.849263	0.739855		0.241302	0.624469	0.0490526	0.262015		0.345058			0.0479055	4	14	0.285714
TTC30B	1554588_a_at				0.998656	0.245611	0.275365	0.697198	0.418935	0.996283	0.314702	0.0365265		0.390979	0.208079	0.0199406	0.0129186		0.010745			0.857097	4	14	0.285714
TTTY8	224142_s_at				0.685689	0.314031	0.16139	0.941675	0.0129966	0.439898	0.196179	0.657839		0.745509	0.0730968	0.038441	0.0125329		0.133835			0.000914864	4	14	0.285714
TTTY8B	224142_s_at				0.685689	0.314031	0.16139	0.941675	0.0129966	0.439898	0.196179	0.657839		0.745509	0.0730968	0.038441	0.0125329		0.133835			0.000914864	4	14	0.285714
TXLNG	1557954_at				0.53239	0.289709	0.802513	0.612923	0.731214	0.785639	0.509969	0.432368		0.00014075	0.00833437	0.7542	0.0156147		0.75693			0.0225527	4	14	0.285714
TXNDC16	226747_at				0.566721	0.40504	0.161842	0.00297033	0.508418	0.0107008	0.0220545	0.105304		0.426121	0.136163	0.70638	0.355792		0.0665005			0.03208	4	14	0.285714
UBR3	234982_at				0.605192	0.159987	0.386136	0.918827	0.627284	0.351936	0.0780201	0.0350782		0.235744	0.656083	0.655826	0.0219242		0.00876554			0.00652076	4	14	0.285714
UGGT1	222569_at				0.353102	0.989515	0.355983	0.533938	0.0389016	0.116752	0.530163	0.897203		0.908796	0.263655	0.0369669	0.0238694		0.033612			0.587856	4	14	0.285714
ULK2	1554112_a_at				0.00232659	0.0191021	0.750454	0.436207	0.822934	0.399287	0.957705	0.223795		0.305992	0.0313325	0.0684091	0.00600094		0.82845			0.664137	4	14	0.285714
USP43	237439_at				0.632634	0.557946	0.0525484	0.0494163	0.0189764	0.00679907	0.369287	0.99441		0.549906	0.83987	0.428581	0.437279		0.196632			0.0193323	4	14	0.285714
UTP23	227836_at				0.0250271	0.871416	0.182731	0.537249	0.256141	0.379139	0.0326466	0.0285929		0.0892756	0.292004	0.472124	0.363426		0.075492			0.00380459	4	14	0.285714
VPS36	222478_at				0.853676	0.824286	6.52e-05	0.00286912	0.276132	0.31046	0.0507954	0.302691		0.219352	0.0429122	0.45478	0.12962		0.181598			0.000189042	4	14	0.285714
VSTM2A	1554530_at				0.0412836	0.784373	0.371275	0.831404	0.735261	0.848222	0.204812	0.00476054		0.0130742	0.230486	0.308156	0.235189		0.265371			0.011551	4	14	0.285714
WDFY3-AS2	238081_at				0.455097	0.372103	0.0408959	0.637041	0.51139	0.498403	0.00335849	0.0412547		0.636259	0.661781	0.359313	0.0104843		0.989509			0.49949	4	14	0.285714
WDPCP	231770_x_at				0.747175	0.534454	0.0805166	0.253836	0.0272133	0.134037	0.0232745	0.0264837		0.23167	0.0529413	0.351493	0.0119047		0.411842			0.781165	4	14	0.285714
WDR27	228326_at				0.339142	0.374294	0.00299692	0.414941	0.046434	0.291209	0.0440425	0.016347		0.473277	0.190363	0.76663	0.363816		0.228233			0.292252	4	14	0.285714
WWC2	222738_at				0.457856	0.959218	0.0725352	0.455028	0.689869	0.466151	0.875595	0.971655		0.0420379	0.124224	0.682012	0.0155623		0.0159567			0.00290047	4	14	0.285714
XCR1	1561226_at				0.435829	0.68757	0.0113436	0.183297	0.00549082	0.0456054	0.826356	0.813866		0.0189395	0.640611	0.709773	0.0959903		0.345651			0.228365	4	14	0.285714
XIAP	225859_at				0.108911	0.364727	0.01207	0.0201101	0.731568	0.434675	0.049491	0.0537866		0.0945871	0.399524	0.771072	0.83045		0.0252263			0.308725	4	14	0.285714
XPR1	222581_at				0.1237	0.0189886	0.555025	0.131256	0.195354	0.0269364	0.5915	0.648566		0.101858	0.820382	0.0200633	0.0311779		0.454024			0.169751	4	14	0.285714
YBEY	227421_at				0.216708	0.77031	0.0119379	0.24851	0.0071856	0.0967511	0.314179	0.621769		0.170562	0.996483	0.203941	0.0110507		0.182346			0.0248981	4	14	0.285714
ZDHHC20	243786_at				0.00808197	0.165128	0.0215691	0.466999	0.0199034	0.709364	0.0856994	0.0491323		0.836579	0.641651	0.337803	0.508248		0.631944			0.357507	4	14	0.285714
ZNF12	1559881_s_at				0.656941	0.0245594	0.00236323	0.506982	0.0257283	0.517469	0.516568	0.438958		0.266086	0.150852	0.240447	0.0739838		0.132605			0.0415942	4	14	0.285714
ZNF25	235164_at				0.32947	0.325161	0.0348951	0.14595	0.391164	0.491193	0.0592777	0.0484452		0.580148	0.782544	0.176809	0.0218284		0.663908			0.00919252	4	14	0.285714
ZNF253	242919_at				0.200512	0.124509	0.00149873	0.70916	0.0204376	0.765733	0.0431687	0.0191918		0.211932	0.399621	0.130658	0.593453		0.218575			0.093102	4	14	0.285714
ZNF268	238030_at				0.268201	0.00975877	0.00296659	0.00494057	0.120857	0.0919807	0.300799	0.219927		0.262928	0.326329	0.50043	0.567734		0.230951			0.0252055	4	14	0.285714
ZNF391	1562446_at				0.056159	0.352528	0.0182545	0.359991	0.0136841	0.313843	0.633059	0.842303		0.590587	0.946487	0.0365898	0.295935		0.0358104			0.810105	4	14	0.285714
ZNF506	238493_at				0.0788464	0.216601	0.00257239	0.373667	0.511154	0.205564	0.039843	0.0235153		0.825871	0.413738	0.623614	0.31935		0.992499			0.00621838	4	14	0.285714
ZNF577	223581_at				0.588953	0.609635	0.00750321	0.724681	0.0112182	0.497839	0.0809079	0.0159284		0.673267	0.095073	0.729174	0.169789		0.477352			0.0143668	4	14	0.285714
ZNF585A	243790_at				0.70358	0.771184	0.0635119	0.0154963	0.898675	0.687354	0.026221	0.0134532		0.16213	0.653278	0.419323	0.386948		0.37424			0.0354045	4	14	0.285714
ZNF625	244406_at				0.594516	0.00822194	0.023071	0.515216	0.248251	0.397766	0.655194	0.4328		0.688769	0.0263665	0.386667	0.300317		0.0133177			0.0753082	4	14	0.285714
ZNF626	1552643_at				0.349883	0.336441	0.645826	0.0428823	0.716796	0.244726	0.387319	0.0136523		0.738731	0.0271605	0.346485	0.59312		0.113401			0.0491614	4	14	0.285714
ZNF709	242028_at				0.033341	0.493268	0.00564531	0.337523	0.099642	0.560498	0.814774	0.182065		0.331613	0.695697	0.938755	0.0819703		0.0281039			0.00306553	4	14	0.285714
ZNF710	39891_at	0.34482	0.551661	0.000724761	0.191447	0.312418	0.81128	0.117153	0.129552	0.0260178	0.0384125	0.0787406	0.028548	0.373542	0.784595	0.0460531	0.169774	0.737977	0.268779	0.362523	0.245538	0.0295518	6	21	0.285714
ZNF827	228046_at				0.940705	0.638003	0.393995	0.379462	0.228982	0.0387414	0.0112794	0.0573958		0.384935	0.394047	0.476195	0.0441227		0.758929			0.00916894	4	14	0.285714
ZNF92	235170_at				0.313149	0.793267	0.0107827	0.220278	0.27251	0.828353	0.020491	0.0678052		0.672096	0.192681	0.494569	0.163241		0.0214534			0.017982	4	14	0.285714
ZNFX1-AS1	226227_x_at				0.507255	0.778092	0.00849267	0.0414575	0.0254693	0.226771	0.144144	0.234879		0.600276	0.394936	0.509315	0.129675		0.0849137			0.0215638	4	14	0.285714
ABCD1P2	216418_at				0.377953	0.964826	0.001737	0.0615835	0.00455986	0.199344	0.0283306	0.497506	0.00897107	0.279837	0.873998	0.023937	0.266277	0.741683	0.9682	0.511179	0.277426	0.516793	5	18	0.277778
ABCG1	204567_s_at				0.583914	0.174617	0.00279287	0.064853	2.27e-05	0.00141045	0.0535852	0.477608	0.0428776	0.463181	0.139717	0.221381	0.0152109	0.327782	0.244131	0.572834	0.387684	0.75316	5	18	0.277778
ABCG2	209735_at				0.430292	0.554965	0.765569	0.613949	0.617122	0.254147	0.149401	0.221168	0.14178	0.893081	0.268658	0.0164155	0.0147238	0.0400719	0.915021	0.00195816	0.0457876	0.21319	5	18	0.277778
ABHD4	218581_at				0.848652	0.162591	0.497979	0.440812	0.0454744	0.55495	0.44495	0.348178	0.00981546	0.367504	0.758577	0.010655	0.0148451	0.99056	0.151833	0.0397706	0.787106	0.104875	5	18	0.277778
AC004878.3	215667_x_at				0.83656	0.43453	0.0181651	0.237026	0.0118298	0.127117	0.102256	0.0138236	0.133165	0.745136	0.442942	0.971022	0.213946	0.012012	0.802209	0.0551365	0.965089	0.00308421	5	18	0.277778
AC005895.4	206430_at				0.582063	0.995169	0.349312	0.787446	0.0391748	0.455087	0.0294734	0.10387	0.058041	0.673703	0.47564	0.575869	0.0330225	0.468605	0.527549	0.0232149	0.307707	0.00169119	5	18	0.277778
AC040173.1	218259_at				0.428779	0.616484	0.739773	0.649739	0.677463	0.412539	0.320937	0.0798794	0.009195	0.940706	0.387735	0.17647	0.0118924	0.122663	0.00507289	0.00685354	0.285611	0.0357658	5	18	0.277778
AC083899.3	218575_at				0.194438	0.769207	0.978093	0.453919	0.756409	0.279594	0.00194784	0.00602615	0.325764	0.304267	0.0357362	0.303694	0.12505	0.307222	0.40252	4.06e-05	0.473974	0.00293073	5	18	0.277778
AC098614.2	212481_s_at				0.0656978	0.838314	0.152124	0.199043	0.185113	0.247206	0.011441	0.00357466	0.704317	0.508732	0.903218	0.00130438	0.0070421	0.0859759	0.261678	5.89e-05	0.184231	0.681447	5	18	0.277778
AC138783.12	215667_x_at				0.83656	0.43453	0.0181651	0.237026	0.0118298	0.127117	0.102256	0.0138236	0.133165	0.745136	0.442942	0.971022	0.213946	0.012012	0.802209	0.0551365	0.965089	0.00308421	5	18	0.277778
AC139149.2	211995_x_at				0.607481	0.894543	0.908597	0.846729	0.186483	0.577669	0.0156734	0.0988934	0.0276582	0.520803	0.204819	0.0341404	0.0356828	0.435116	0.757939	0.784069	0.549398	0.00903796	5	18	0.277778
ACACB	214584_x_at				0.00741978	0.103802	0.270218	0.484663	0.741776	0.827435	0.66193	0.145621	0.0194933	0.0150642	0.314596	0.00858462	0.981681	0.0142296	0.281771	0.862522	0.129788	0.281669	5	18	0.277778
ACADM	202502_at				0.824755	0.200568	0.0210864	0.669318	0.897131	0.101807	0.290482	0.117598	0.00210742	0.0286165	0.146478	0.0158447	0.928957	0.502615	0.331003	0.33933	0.122158	0.0124814	5	18	0.277778
ACTG1	211995_x_at				0.607481	0.894543	0.908597	0.846729	0.186483	0.577669	0.0156734	0.0988934	0.0276582	0.520803	0.204819	0.0341404	0.0356828	0.435116	0.757939	0.784069	0.549398	0.00903796	5	18	0.277778
ACTN4	200601_at				0.258029	0.433717	0.10855	0.122007	0.0835424	0.0891563	0.0358607	0.0580817	0.0308432	0.371659	0.501015	0.503881	0.0451339	0.754238	0.41849	0.0449235	0.897602	4.19e-05	5	18	0.277778
ACTR3	213102_at				0.631485	0.537771	0.236762	0.938734	0.381323	0.0196919	0.0952002	0.0674592	0.0406938	0.613263	0.118022	0.0957413	0.0447424	0.112266	0.000942005	0.531154	0.00632737	0.150783	5	18	0.277778
ACVR1	203935_at				0.726096	0.622062	0.316429	0.985345	0.445601	0.911545	0.619104	0.927747	0.0122273	0.13035	0.0446477	0.078598	0.0421796	0.260567	0.00163233	0.158928	0.0479809	0.0694236	5	18	0.277778
ADAM28	205997_at				0.0891353	0.194687	0.0827219	0.0141145	0.531211	0.0697273	0.0397	0.0172098	0.0533516	0.276823	0.457281	0.029264	0.920501	0.193106	0.41418	0.00722851	0.179635	0.355512	5	18	0.277778
ADAM7	211238_at				0.561207	0.446613	0.0288929	0.660923	0.0108967	0.324001	0.436265	0.110233	0.0209725	0.940081	0.32966	0.708645	0.027135	0.474719	0.207625	0.0215946	0.71539	0.732906	5	18	0.277778
ADIPOR2	201346_at				0.586542	0.521792	0.298805	0.173824	0.415921	0.632095	0.0459665	0.302973	0.000750709	0.522	0.602019	0.450045	0.0425106	0.595182	0.0493728	0.0161955	0.193976	0.235314	5	18	0.277778
ADNP	201773_at				0.838132	0.190536	0.48904	0.69415	0.797377	0.811157	0.550658	0.19644	0.00285669	0.083752	0.883432	0.131243	0.0370876	0.112634	0.0453986	0.0193147	0.405947	0.00232781	5	18	0.277778
ADNP2	203322_at				0.00299244	0.0729514	0.00333677	0.174972	0.0372975	0.617123	0.117143	0.185744	0.0118319	0.712044	0.259927	0.324074	0.517136	0.498104	0.0911307	0.000514749	0.648632	0.107888	5	18	0.277778
AIF1	213095_x_at				0.0244286	0.0381252	0.204713	0.128346	0.996126	0.264936	0.172501	0.646156	0.0408392	0.451207	0.832593	0.00037493	0.0169047	0.050302	0.294085	0.851798	0.130562	0.167253	5	18	0.277778
AIMP2	209971_x_at				0.737896	0.276244	0.0345618	0.013058	0.0861195	0.0529418	0.463504	0.451459	0.0921434	0.335548	0.205489	0.0197076	0.0403224	0.134556	0.345269	0.0813476	0.401208	0.0219605	5	18	0.277778
AK1	202587_s_at				0.554196	0.89843	0.0229168	0.24341	0.190851	0.59776	0.00382671	0.00953933	0.864644	0.972306	0.884025	0.530618	0.0481874	0.446813	0.253431	0.00451825	0.700101	0.605797	5	18	0.277778
AKAP2	202759_s_at				0.871862	0.2181	0.567936	0.0322451	0.735998	0.0468553	0.883739	0.815508	0.0141334	0.647851	0.0384246	0.19442	0.0517223	0.428292	0.0714713	0.00600309	0.823484	0.272645	5	18	0.277778
AKTIP	218373_at				0.79224	0.1912	0.0366887	0.0421736	0.1986	0.476529	0.979837	0.991351	0.0110591	0.454448	0.778108	0.562019	0.0413504	0.855174	0.450239	0.40137	0.0401338	0.656483	5	18	0.277778
ALG12	218444_at				0.948487	0.448033	0.77136	0.876912	0.377502	0.934621	0.313931	0.212221	0.0236086	0.69664	0.439603	0.0098345	0.194844	0.0157882	0.0841164	0.0185069	0.458018	0.0248832	5	18	0.277778
ALKBH1	205621_at				0.645528	0.298113	0.157261	0.343046	0.457471	0.530836	0.0444817	0.0210424	0.00459939	0.957779	0.846917	0.0266208	0.563219	0.37543	0.77986	0.000456272	0.309122	0.111229	5	18	0.277778
ANAPC1	218575_at				0.194438	0.769207	0.978093	0.453919	0.756409	0.279594	0.00194784	0.00602615	0.325764	0.304267	0.0357362	0.303694	0.12505	0.307222	0.40252	4.06e-05	0.473974	0.00293073	5	18	0.277778
ANGPT1	205609_at				0.209658	0.938879	0.0910701	0.188229	0.597881	0.937648	0.521745	0.0445145	0.0302108	0.209831	0.246367	0.0326802	0.0030575	0.221986	0.050085	0.00429184	0.551874	0.0981081	5	18	0.277778
ANKRD12	212289_at				0.368963	0.592093	0.0631948	0.56842	0.643036	0.717709	0.363796	0.241222	0.0265699	0.481188	0.241908	0.905222	0.00184988	0.0957599	0.010391	0.031512	0.786023	0.0139317	5	18	0.277778
ANKRD36	214723_x_at				0.0980851	0.853712	0.207491	0.593534	0.101547	0.29223	0.220627	0.0288797	0.838626	0.999086	0.0877204	0.833675	0.0331505	0.0303405	0.037009	0.00633268	0.665587	0.953276	5	18	0.277778
ANKRD36B	214723_x_at				0.0980851	0.853712	0.207491	0.593534	0.101547	0.29223	0.220627	0.0288797	0.838626	0.999086	0.0877204	0.833675	0.0331505	0.0303405	0.037009	0.00633268	0.665587	0.953276	5	18	0.277778
ANKRD36C	214723_x_at				0.0980851	0.853712	0.207491	0.593534	0.101547	0.29223	0.220627	0.0288797	0.838626	0.999086	0.0877204	0.833675	0.0331505	0.0303405	0.037009	0.00633268	0.665587	0.953276	5	18	0.277778
ANKRD46	212731_at				0.60783	0.495495	0.358639	0.643079	0.524675	0.839512	0.714058	0.993654	0.000356499	0.311337	0.0339096	0.0625339	0.877694	0.0528788	0.0616772	0.0297524	0.0499997	0.00763904	5	18	0.277778
ANPEP	202888_s_at				0.857553	0.55905	0.283969	0.0214989	0.838098	0.08706	0.0319212	0.0428619	0.178575	0.040601	0.316911	0.0622932	0.00932115	0.159448	0.456862	0.188204	0.445203	0.0765673	5	18	0.277778
AP2B1	200615_s_at				0.705762	0.488644	0.0248515	0.0266132	0.160362	0.199537	0.0397683	0.0770095	0.407643	0.443959	0.0395496	0.853073	0.0524508	0.256965	0.0226484	0.797341	0.419003	0.479769	5	18	0.277778
AP5M1	218139_s_at				0.97055	0.314951	0.112952	0.893819	0.831694	0.44898	0.0105467	0.0322551	0.00226882	0.796194	0.129926	0.641816	0.362864	0.144689	0.0359097	0.302973	0.0578885	0.0272441	5	18	0.277778
APBA3	205146_x_at				0.652532	0.827447	0.0179057	0.04163	0.00483805	0.0620259	0.277638	0.120483	0.22474	0.591338	0.0148294	0.474847	0.775113	0.235096	0.222582	0.00244183	0.964621	0.733175	5	18	0.277778
APOBR	220023_at				0.700586	0.59297	0.863241	0.233843	0.171527	0.394228	0.429796	0.543976	0.00421011	0.0139205	0.689191	0.442893	0.858409	0.306763	0.1756	0.0404232	0.0163678	0.00061849	5	18	0.277778
APOO	221620_s_at				0.45579	0.539942	0.0493109	0.361654	0.793807	0.576436	0.0739627	0.0120676	0.00367021	0.696237	0.720146	0.530721	0.716966	0.026653	0.0397163	0.827051	0.430809	0.151266	5	18	0.277778
APPBP2	202629_at				0.768172	0.971734	0.637106	0.7509	0.792538	0.672653	0.142859	0.216216	0.0561953	0.889784	0.422016	0.794078	0.2491	0.0382823	0.0432847	0.0120053	0.00416277	5.5e-05	5	18	0.277778
APPL1	218158_s_at				0.377203	0.552046	0.921817	0.692498	0.914627	0.668781	0.0314387	0.00432899	0.0500067	0.221779	0.306577	0.953259	0.0344604	0.008316	0.00165599	0.528434	0.12765	0.067666	5	18	0.277778
ARFGEF1	202956_at				0.620353	0.466236	0.853487	0.806836	0.228851	0.464781	0.325286	0.482185	0.0225719	0.72828	0.213683	0.736803	0.00441508	0.0299326	0.552983	0.0152307	0.660224	0.0206241	5	18	0.277778
ARFIP1	218230_at				0.246821	0.83567	0.360498	0.608334	0.47345	0.988279	0.944839	0.515868	0.0141955	0.463833	0.568668	0.200553	0.0281067	0.014292	0.0436167	0.0181842	0.271202	0.694399	5	18	0.277778
ARHGEF15	205507_at				0.36813	0.738953	0.778895	0.00122101	0.345892	0.0186925	0.0232213	0.0050224	0.0105665	0.25699	0.608718	0.188359	0.127407	0.130893	0.962996	0.190497	0.840472	0.180594	5	18	0.277778
ARL6IP5	200761_s_at				0.841891	0.213635	0.712711	0.251666	0.66266	0.31365	0.633114	0.343759	0.229602	0.759513	0.262689	0.294367	0.0259721	0.0486334	0.0352477	0.0171986	0.167514	0.00592219	5	18	0.277778
ARL8B	217852_s_at				0.0151373	0.808411	0.791457	0.196487	0.757617	0.399007	0.728329	0.554917	0.0235292	0.509745	0.449447	0.815509	0.219049	0.0402889	0.0130497	0.278538	0.0864392	0.000949918	5	18	0.277778
ARPC1B	201954_at				0.167421	0.100572	0.0116841	0.0287746	0.0681167	0.234413	0.124517	0.447461	0.68374	0.293634	0.673217	0.0140109	0.0299819	0.121576	0.372184	0.204576	0.827082	0.00053889	5	18	0.277778
ARPC3	208736_at				0.800186	0.213784	0.357012	0.410172	0.0269632	0.612258	0.838174	0.422726	0.0342252	0.119227	0.110897	0.0584306	0.0126687	0.0964409	0.0283351	0.00629179	0.769399	0.102452	5	18	0.277778
ASCC3	212815_at				0.653367	0.248733	0.175884	0.471268	0.742309	0.838468	0.0816706	0.0604741	0.011989	0.544872	0.0781539	0.860745	0.00527166	0.0126567	0.0129406	0.0622038	0.0884378	0.0447243	5	18	0.277778
ASF1A	203427_at				0.771762	0.215656	0.979052	0.297476	0.372179	0.920582	0.0704611	0.0162288	0.00100438	0.745801	0.275105	0.114504	0.104876	0.314542	0.00759754	0.011276	0.067083	0.00135271	5	18	0.277778
ASGR1	206743_s_at				0.895611	0.181427	0.0491059	0.468826	0.165142	0.971756	0.0396304	0.316235	0.00665146	0.255715	0.175705	0.742385	0.499156	0.0972063	0.0385817	0.177023	0.630638	0.00199375	5	18	0.277778
ASS1	207076_s_at				0.0220297	0.0113477	0.854517	0.712245	0.00760309	0.0081682	0.618349	0.732296	0.0137418	0.794103	0.382051	0.791285	0.914726	0.861387	0.794018	0.0633786	0.567905	0.312027	5	18	0.277778
ATP10A	214255_at				0.23664	0.541551	0.121052	0.974067	0.0346516	0.519353	0.0428096	0.0314805	0.00199889	0.332719	0.324943	0.253518	0.00827902	0.0703513	0.673339	0.0647111	0.936704	0.476165	5	18	0.277778
ATP1B1	201243_s_at				0.234456	0.272328	0.0919103	0.166987	0.0799674	0.109314	0.206187	0.0432907	0.0344811	0.261458	0.574249	0.0113736	0.00136476	0.382498	0.064353	0.104842	0.456248	0.0133821	5	18	0.277778
ATP2B1	212930_at				0.204052	0.698296	0.124383	0.0459699	0.31143	0.158367	0.321066	0.489821	0.435958	0.153916	0.773914	0.0481089	0.0363836	0.136293	0.0310878	0.651025	0.480689	0.0445986	5	18	0.277778
ATP5F1	211755_s_at				0.353016	0.160756	0.66012	0.937999	0.235146	0.142811	0.0132686	0.0400838	0.0337127	0.919902	0.0559745	0.300323	0.0445976	0.0814417	0.0219461	0.95866	0.092821	0.124012	5	18	0.277778
ATP5G1	208972_s_at				0.653705	0.889117	0.995041	0.675433	0.0612401	0.0340304	0.265966	0.0328459	0.0402345	0.192685	0.590867	0.528073	0.570439	0.0304636	0.0110061	0.774127	0.976607	0.342094	5	18	0.277778
ATP6V1B2	201089_at				0.719208	0.199765	0.42628	0.84563	0.343017	0.158972	0.00994058	0.0123617	0.00363963	0.868137	0.238273	0.0894947	0.00502498	0.887519	0.480364	0.038563	0.327253	0.816338	5	18	0.277778
AUH	205052_at				0.247437	0.199041	0.0340527	0.155274	0.411073	0.782806	0.000948304	0.00172128	0.0208843	0.249059	0.668704	0.0887864	0.996433	0.0201823	0.29025	0.295017	0.0812655	0.920831	5	18	0.277778
B4GALT5	221485_at				0.82579	0.812714	0.0180848	0.475644	0.126455	0.0978263	0.00251817	0.0136352	0.842045	0.0461846	0.551412	0.119161	0.41684	0.0895186	0.0980465	0.0439948	0.319488	0.370885	5	18	0.277778
BACE2	217867_x_at				0.142209	0.2589	0.0489667	0.0586667	0.117122	0.0284977	0.289104	0.0379803	0.837444	0.292683	0.778978	0.853556	0.0216452	0.595061	0.321762	0.0186727	0.586097	0.447829	5	18	0.277778
BACH2	221234_s_at				0.356041	0.44324	0.159436	0.0313537	0.604671	0.0429807	0.468328	0.847773	0.620273	0.54957	0.161942	0.105077	0.0118545	0.340729	0.193008	0.00298087	0.762921	0.0259452	5	18	0.277778
BAG5	202984_s_at				0.0435303	0.418127	0.179433	0.275588	0.82048	0.967729	0.0115637	0.0196699	0.0145944	0.112876	0.797752	0.722196	0.713309	0.45133	0.0866961	0.380678	0.278872	0.0312305	5	18	0.277778
BBX	213016_at				0.926916	0.936525	0.53168	0.798328	0.226978	0.674453	0.0452898	0.188001	0.0868557	0.513968	0.0154659	0.997699	0.0168384	0.0338805	0.136035	0.605782	0.327109	0.000159886	5	18	0.277778
BCAP29	205084_at				0.819684	0.475664	0.106191	0.397363	0.19457	0.482378	0.523348	0.755998	0.0138263	0.219933	0.546485	0.0204465	0.035543	0.0162847	0.509419	0.869641	0.0351783	0.317962	5	18	0.277778
BCL7A	203796_s_at				0.00738592	0.16958	0.00718894	0.390314	0.00287947	0.477717	0.129655	0.043476	0.00290179	0.778068	0.255595	0.775314	0.193121	0.0977783	0.40703	0.227291	0.792956	0.809949	5	18	0.277778
BNIP3	201849_at				0.647086	0.191168	0.0233378	0.227899	0.115666	0.196745	0.164991	0.16076	0.0398404	0.801971	0.720933	0.00218671	0.778676	0.551583	0.0269901	0.543317	0.189851	0.00383847	5	18	0.277778
BRP44L	218024_at				0.691552	0.44646	0.27748	0.231727	0.580388	0.0173284	0.0419815	0.0267606	0.00231839	0.644816	0.07419	0.0386198	0.0974873	0.19035	0.286568	0.831586	0.0936945	0.94727	5	18	0.277778
BUB3	201458_s_at				0.0415064	0.770781	0.791274	0.767054	0.617717	0.579384	0.107817	0.172912	0.000455928	0.179473	0.410708	0.727023	0.0431948	0.0139435	0.0871635	0.249523	0.435063	0.00439368	5	18	0.277778
BX511012.1	206095_s_at				0.547371	0.461308	0.584581	0.548923	0.597474	0.850192	0.516235	0.733498	0.000194961	0.841691	0.281535	0.491565	0.478713	0.0281336	0.0366054	0.0265527	0.00339616	0.130044	5	18	0.277778
C12orf29	213701_at				0.435157	0.794989	0.392879	0.301094	0.489808	0.914086	0.0166178	0.142199	0.00457522	0.0806465	0.456554	0.657108	0.862555	0.0830204	0.033866	0.0101708	0.493166	0.00321881	5	18	0.277778
C14orf133	218431_at				0.221371	0.518731	0.0238971	0.0683751	0.113489	0.235918	0.333425	0.0438553	0.114615	0.0436995	0.134233	0.995214	0.00567281	0.262659	0.0909721	0.630924	0.0185789	0.390795	5	18	0.277778
C15orf39	204494_s_at				0.156979	0.0935655	0.00286809	0.304381	0.0260494	0.731202	0.822263	0.640288	0.133106	0.565472	0.551408	0.847051	0.799213	0.694565	0.85669	0.0106486	0.0114108	0.0175494	5	18	0.277778
C16orf58	217891_at				0.521291	0.659387	0.208846	0.763739	0.561369	0.282711	0.00533428	0.00988521	0.159301	0.839911	0.0103455	0.464239	0.0209331	0.559752	0.011933	0.294501	0.136823	0.482296	5	18	0.277778
C1orf105	214357_at				0.798204	0.840115	0.00800947	0.123869	0.0158464	0.139457	0.591476	0.913293	0.0175989	0.392017	0.687021	0.274067	0.0389882	0.22218	0.901461	0.0251678	0.419817	0.576142	5	18	0.277778
C1QB	202953_at				0.348093	0.795114	0.353212	0.399678	0.348017	0.307087	0.00552751	0.00402577	0.0516259	0.818268	0.510494	0.000863709	0.00243955	0.0892565	0.233934	0.0195358	0.247696	0.179144	5	18	0.277778
C22orf28	200042_at				0.208067	0.472609	0.225194	0.531761	0.539562	0.607147	0.0314964	0.038897	0.00287169	0.177958	0.170352	0.667485	0.714857	0.996445	0.180848	0.00521961	0.320831	0.013811	5	18	0.277778
C2orf82	212260_at				0.567951	0.373706	0.327007	0.0168886	0.765272	0.0665803	0.109293	0.344955	0.0287564	0.84332	0.0819451	0.0409266	0.0147209	0.52383	0.313946	0.00816591	0.569522	0.0775799	5	18	0.277778
C3orf18	219114_at				0.910602	0.81022	0.0275229	0.0339971	0.251372	0.176724	0.75803	0.895896	0.0506832	0.618196	0.0289872	0.757142	0.12734	0.191737	0.026994	0.0599777	0.0493728	0.301173	5	18	0.277778
C6orf62	208809_s_at				0.628995	0.376017	0.0420058	0.158713	0.0169796	0.044214	0.569382	0.964475	0.137874	0.162832	0.179466	0.145664	0.0401663	0.79221	0.0113894	0.180795	0.966902	0.0570841	5	18	0.277778
CACTIN	215954_s_at				0.0527989	0.472094	0.00721137	0.0752581	0.00347697	0.0977657	0.926049	0.94963	0.00360147	0.928135	0.0153618	0.101519	0.0802918	0.878097	0.380361	0.125221	0.27216	0.0110604	5	18	0.277778
CALCR	207887_s_at				0.106512	0.207539	0.743033	0.640419	0.0849936	0.151055	0.0459033	0.00320694	0.00457274	0.18984	0.0606908	0.427848	0.0410171	0.873156	0.512576	0.029172	0.72622	0.92249	5	18	0.277778
CAMP	210244_at				0.19279	0.504188	0.0197192	0.0222358	0.818065	0.51532	0.0611796	0.00697668	0.039911	0.0613271	0.09412	0.750444	0.105596	0.0016817	0.271259	0.0638883	0.186692	0.242518	5	18	0.277778
CAMSAP2	212765_at				0.763585	0.881936	0.0560585	0.288059	0.000438485	0.0332125	0.841834	0.851874	0.0175031	0.0502623	0.958002	0.539123	0.127345	0.135203	0.025447	0.876304	0.28426	0.00758444	5	18	0.277778
CASD1	219342_at				0.0376989	0.446286	0.852688	0.79084	0.958113	0.721413	0.423936	0.353509	0.00576979	0.472175	0.0671699	0.0168595	0.037615	0.0656673	0.196062	0.200759	0.414818	0.0330092	5	18	0.277778
CASP1	206011_at				0.188375	0.00935398	0.0896841	0.00324866	0.242065	0.0415339	0.946377	0.55923	0.00187546	0.57585	0.0971926	0.00691764	0.0776123	0.180142	0.470092	0.530504	0.369692	0.0500326	5	18	0.277778
CBFB	202370_s_at				0.319769	0.415266	0.020193	0.0967672	0.592299	0.895107	0.802398	0.273085	0.00886536	0.511882	0.786388	0.07669	0.00741135	0.0184378	0.0621982	0.965673	0.607067	0.00378179	5	18	0.277778
CCBL2	209472_at				0.178677	0.922839	0.161089	0.841089	0.109032	0.824118	0.187986	0.00613007	0.00728747	0.0616875	0.8304	0.488066	0.136276	0.0308289	0.0305823	0.789114	0.152709	0.0142351	5	18	0.277778
CCDC28A	209479_at				0.125041	0.286709	0.251459	0.0488042	0.538018	0.906068	0.0138381	0.0314954	0.0553633	0.871608	0.129911	0.407766	0.0093191	0.045222	0.607941	0.105099	0.315198	0.631843	5	18	0.277778
CCL3	205114_s_at				0.391852	0.0178261	0.778259	0.584988	0.285347	0.140547	0.806172	0.0234761	0.0508944	0.000448686	0.903306	0.0291553	0.00520805	0.339737	0.253431	0.225769	0.0976792	0.759724	5	18	0.277778
CCL3L1	205114_s_at				0.391852	0.0178261	0.778259	0.584988	0.285347	0.140547	0.806172	0.0234761	0.0508944	0.000448686	0.903306	0.0291553	0.00520805	0.339737	0.253431	0.225769	0.0976792	0.759724	5	18	0.277778
CCL3L3	205114_s_at				0.391852	0.0178261	0.778259	0.584988	0.285347	0.140547	0.806172	0.0234761	0.0508944	0.000448686	0.903306	0.0291553	0.00520805	0.339737	0.253431	0.225769	0.0976792	0.759724	5	18	0.277778
CCL8	214038_at				0.147603	0.605485	0.604895	0.428923	0.00130302	0.860748	0.936306	0.666797	0.0444085	0.00168135	0.115385	0.134163	0.0189855	0.0678647	0.532717	0.000251155	0.165868	0.065926	5	18	0.277778
CCNB1IP1	217988_at				0.566871	0.357922	0.0228406	0.150721	0.175977	0.327207	0.0327223	0.0515094	0.0162266	0.414953	0.482248	0.0300802	0.955239	0.0246439	0.994726	0.544689	0.434175	0.0992644	5	18	0.277778
CCPG1	214151_s_at				0.714493	0.491776	0.158315	0.0174369	0.268269	0.682963	0.881973	0.849649	0.00281566	0.213618	0.760655	0.0050287	0.000496075	0.109778	0.0555654	0.00152962	0.218544	0.113486	5	18	0.277778
CD180	206206_at				0.955171	0.193807	0.493655	0.380144	0.749094	0.796031	0.0484539	0.0248778	0.0216754	0.211073	0.429235	0.0153271	0.290511	0.908489	0.942927	4.34e-05	0.320633	0.214907	5	18	0.277778
CD28	206545_at				0.380739	0.395423	0.112614	0.00238271	0.166496	0.0114326	0.188853	0.0797985	0.145334	0.429563	0.888166	0.0122178	7.99e-05	0.841425	0.289257	0.329104	0.280476	0.0449477	5	18	0.277778
CD300A	209933_s_at				0.18315	0.329297	0.492818	0.172885	0.983791	0.534463	0.12578	0.015517	0.00226758	0.19898	0.415876	0.00155515	0.0118357	0.0249615	0.855515	0.520881	0.590615	0.407607	5	18	0.277778
CD48	204118_at				0.373759	0.76557	0.317552	0.0664932	0.344186	0.0585146	0.387466	0.0391947	0.0291904	0.446798	0.618207	0.0086315	0.0497427	0.486068	0.0609136	0.51427	0.231878	0.0392937	5	18	0.277778
CD53	203416_at				0.346056	0.00787852	0.185428	0.0441638	0.6529	0.312278	0.103272	0.114391	0.281925	0.419996	0.445706	0.0102802	0.000566834	0.32808	0.0740526	5.44e-05	0.120485	0.646642	5	18	0.277778
CD74	209619_at				0.176325	0.48785	0.330564	0.169084	0.945602	0.626153	0.0599072	0.165639	0.0100967	0.015806	0.106404	0.0322341	0.0914039	0.436827	0.915335	0.0138355	0.0849663	0.0384825	5	18	0.277778
CD86	210895_s_at				0.148348	0.119754	0.209301	0.969035	0.181758	0.90317	0.00835292	0.0392134	0.00999102	0.824018	0.426887	0.0668803	0.0366784	0.704131	0.0480739	0.970758	0.619506	0.922414	5	18	0.277778
CDC42BPA	214464_at				0.00753741	0.556904	0.0182808	0.263804	0.0104058	0.214681	0.516881	0.998323	0.526905	0.96229	0.091283	0.123207	0.00937457	0.0695034	0.0204917	0.302595	0.720169	0.59175	5	18	0.277778
CDH8	210518_at				0.164523	0.517999	0.392854	0.728062	0.632344	0.76345	0.46179	0.585351	0.000190416	0.0339727	0.0555392	0.0152034	0.125778	0.0319129	0.57396	0.0450042	0.956763	0.0781323	5	18	0.277778
CDKN2C	204159_at				0.637565	0.479642	0.0173752	0.0083907	0.452328	0.491785	0.0249164	0.00435803	0.189215	0.613061	0.124533	0.00621039	0.31305	0.303551	0.327884	0.847447	0.919027	0.317236	5	18	0.277778
CDX1	206430_at				0.582063	0.995169	0.349312	0.787446	0.0391748	0.455087	0.0294734	0.10387	0.058041	0.673703	0.47564	0.575869	0.0330225	0.468605	0.527549	0.0232149	0.307707	0.00169119	5	18	0.277778
CEACAM21	216605_s_at				0.983178	0.765061	0.88264	0.534302	0.023704	0.55644	0.293283	0.0203998	0.0023994	0.217635	0.132423	0.567805	0.0377568	0.607207	0.944921	0.0965168	0.244588	0.0436362	5	18	0.277778
CEP350	213165_at				0.846253	0.148549	0.461705	0.0780451	0.629559	0.701205	0.732254	0.604147	0.0112585	0.312468	0.333347	0.259773	0.470914	0.0169819	0.0434934	0.000367186	0.284409	0.00177233	5	18	0.277778
CEP76	219311_at				0.511897	0.475623	0.260436	0.000912818	0.840566	0.0422504	0.952982	0.481205	0.00451543	0.685449	0.449628	0.703485	0.752967	0.835563	0.131816	0.00839995	0.127324	0.0252316	5	18	0.277778
CETN2	209194_at				0.32573	0.925759	0.885865	0.545657	0.983129	0.537696	0.418537	0.0503744	0.0197891	0.0995494	0.985547	0.0257666	0.0250075	0.0308867	0.00296765	0.362547	0.0567308	0.713534	5	18	0.277778
CFLAR	214618_at				0.73971	0.322582	0.0210725	0.239704	0.0888698	0.602836	0.940845	0.513695	0.0170524	0.171447	0.0445287	0.0950643	0.0469862	0.0559244	0.510368	0.653124	0.954047	0.00630973	5	18	0.277778
CFP	206380_s_at				0.0735497	0.0828124	0.088136	0.0191783	0.52208	0.100273	0.656898	0.486538	0.0197411	0.408885	0.0344484	0.0849059	0.424356	0.148249	0.586396	0.0390563	0.906953	0.00601009	5	18	0.277778
CHCHD3	217972_at				0.514291	0.589138	0.559388	0.394654	0.0769785	0.0697522	0.0147815	0.0100195	0.016021	0.860036	0.476155	0.68226	0.877305	0.201154	0.0142136	0.0506649	0.0343809	0.224388	5	18	0.277778
CHUK	209666_s_at				0.697123	0.418608	0.46088	0.909202	0.779296	0.307834	0.0346368	0.0294737	0.00140302	0.626691	0.501622	0.444557	0.0972598	0.452797	0.015725	0.346274	0.0088552	0.173216	5	18	0.277778
CISH	221223_x_at				0.674777	0.875991	0.795456	0.38537	0.978493	0.849122	0.639137	0.531888	0.0486434	0.0193041	0.704319	0.00573642	0.0960174	0.594398	0.310401	0.000190398	0.0235636	0.480176	5	18	0.277778
CKAP2	218252_at				0.847909	0.817248	0.617832	0.850718	0.984744	0.926199	0.0518305	0.65352	0.23861	0.104314	0.00488366	0.195025	0.000705551	0.0441442	0.602053	0.00604459	0.650383	0.00677443	5	18	0.277778
CKB	200884_at				0.0570008	0.521009	0.000826678	0.0256961	0.16536	0.609061	0.0441803	0.14856	0.166138	0.622794	0.160982	0.253709	0.0138218	0.53971	0.825801	0.34333	0.985926	0.0405725	5	18	0.277778
CLDN11	206908_s_at				0.133476	0.829529	0.940979	0.762155	0.448862	0.257415	0.0100892	0.146231	0.00729929	0.611945	0.00487092	0.444331	0.389012	0.0492533	0.678698	0.305797	0.0420653	0.68596	5	18	0.277778
CLEC4A	221724_s_at				0.678623	0.0950906	0.185137	0.497917	0.766689	0.562021	0.0324209	0.00161115	0.115379	0.0910825	0.0419566	0.228919	0.0260836	0.532603	0.515517	0.0288587	0.521403	0.873481	5	18	0.277778
CLEC7A	221698_s_at				0.27331	0.639728	0.0134291	0.0206255	0.45284	0.517887	0.114387	0.0507475	0.154271	0.147736	0.169869	0.0155081	0.0385176	0.112735	0.0267649	0.618671	0.367743	0.96938	5	18	0.277778
CMAHP	210571_s_at				0.542823	0.783886	0.205614	0.976248	0.0155242	0.407779	0.897967	0.676378	0.00127462	0.0334987	0.93953	0.198316	0.0374747	0.0907151	0.135514	0.00381799	0.957031	0.229962	5	18	0.277778
CNN2	201605_x_at				0.754112	0.731782	0.566738	0.0672073	0.98873	0.519653	0.0246601	0.143426	0.00507141	0.0209489	0.901631	0.0719158	0.156226	0.472833	0.967418	0.000420887	0.480556	0.0123252	5	18	0.277778
CNTRL	205642_at				0.815032	0.724069	0.0321435	0.59026	0.0155349	0.498696	0.952152	0.494908	0.0904942	0.728824	0.137932	0.856676	0.0746555	0.0222768	0.848226	0.0428115	0.977721	0.00152873	5	18	0.277778
COG2	203073_at				0.382662	0.217933	0.0664251	0.412449	0.330914	0.465574	0.0178837	0.00895362	0.00460406	0.925653	0.0548865	0.991121	0.992619	0.1518	0.0773852	3.56e-06	0.211185	0.0258463	5	18	0.277778
COG5	203630_s_at				0.838623	0.205799	0.62792	0.558335	0.843599	0.702264	0.572364	0.839433	0.00266748	0.398856	0.305864	0.569254	0.568397	0.0090732	0.00884384	0.00457257	0.982767	0.0356895	5	18	0.277778
COPE	201264_at				0.00764448	0.0478649	0.917733	0.815507	0.604767	0.510332	0.571865	0.196576	0.00404693	0.863346	0.701866	0.571492	0.546344	0.149651	0.247592	0.0347711	0.584785	0.00174742	5	18	0.277778
COPS2	202467_s_at				0.308282	0.959478	0.0761822	0.0410809	0.750942	0.36997	0.150641	0.338196	0.00326706	0.189107	0.373806	0.623604	0.474016	0.0376243	0.00799293	0.553013	0.234111	0.00620792	5	18	0.277778
COPS4	218042_at				0.994483	0.131526	0.905958	0.292368	0.343212	0.874197	0.03892	0.0896432	0.0192229	0.961614	0.529384	0.567157	0.943064	0.228356	0.0158395	0.0138159	0.15535	0.0187645	5	18	0.277778
COX5A	203663_s_at				0.983661	0.718851	0.506502	0.448324	0.0557495	0.0485032	0.0715634	0.0205483	0.00669559	0.718349	0.818557	0.472938	0.518815	0.191616	0.0415848	6.71e-08	0.614026	0.979699	5	18	0.277778
COX5B	213735_s_at				0.140773	0.952858	0.246086	0.26168	0.0264153	0.0424525	0.0637602	0.0548422	0.114608	0.00837726	0.663695	0.922098	0.31597	0.138135	0.0197282	0.000740429	0.66846	0.34569	5	18	0.277778
COX7C	217491_x_at				0.824523	0.120613	0.245205	0.815843	0.0551364	0.11493	0.282233	0.353189	0.189471	0.02273	0.300502	0.0162571	0.0174669	0.205005	0.00343385	0.00227754	0.755834	0.102359	5	18	0.277778
COX7CP1	217491_x_at				0.824523	0.120613	0.245205	0.815843	0.0551364	0.11493	0.282233	0.353189	0.189471	0.02273	0.300502	0.0162571	0.0174669	0.205005	0.00343385	0.00227754	0.755834	0.102359	5	18	0.277778
CREBZF	202979_s_at				0.227997	0.753077	0.979013	0.936974	0.694915	0.925438	0.266291	0.55363	0.00569683	0.477441	0.329689	0.719171	0.0130458	0.706107	0.0191254	0.00745544	0.828068	0.0062644	5	18	0.277778
CREG1	201200_at				0.992484	0.284744	0.454888	0.290032	0.643988	0.902405	0.046074	0.126245	0.00122998	0.941178	0.0211896	0.00245621	0.000826479	0.796775	0.117055	0.681188	0.361719	0.159716	5	18	0.277778
CRK	202225_at				0.919637	0.475536	0.447427	0.583987	0.769183	0.545606	0.157239	0.628773	0.0144607	0.169847	0.630848	0.0168046	0.0114592	0.257617	0.0199454	0.0247382	0.076477	0.932337	5	18	0.277778
CRY1	209674_at				0.716946	0.789133	0.0902533	0.48368	0.176008	0.677175	0.776642	0.923964	0.00102594	0.457808	0.56836	0.0249217	0.0293618	0.60399	0.000145987	0.214283	0.082285	0.0141779	5	18	0.277778
CRYZ	202950_at				0.693485	0.353029	0.587619	0.585899	0.788329	0.920796	0.581856	0.754063	0.00890544	0.603693	0.691022	0.858671	0.876835	0.00287164	0.0265558	0.0421121	0.0326188	0.152288	5	18	0.277778
CSE1L	210766_s_at				0.903142	0.502948	0.234711	0.309648	0.0240703	0.0295749	0.645045	0.272017	0.037147	0.276729	0.312578	0.825879	0.33636	0.120569	0.323689	0.00100001	0.453015	0.0185936	5	18	0.277778
CTB-13H5.1	212042_x_at				0.159112	0.596407	0.118958	0.419986	0.00982131	0.11794	0.891524	0.44694	0.00650858	0.200814	0.849413	0.0313858	0.439498	0.978316	0.00026269	0.000184366	0.346018	0.179649	5	18	0.277778
CTD-2287O16.1	200091_s_at				0.481401	0.703173	0.0419135	0.729036	0.0426531	0.429356	0.896971	0.75071	0.397732	0.17057	0.666293	0.0979397	0.0254383	0.619269	0.00611229	0.0115722	0.876176	0.109364	5	18	0.277778
CTNNA1	215883_at				0.946846	0.0807223	0.390578	0.0430763	0.599338	0.117606	0.0389136	0.041523	0.115941	0.451528	0.503663	0.835758	0.126583	0.95833	0.0399723	0.0314058	0.980512	0.113532	5	18	0.277778
CTR9	202060_at				0.96973	0.457464	0.0765411	0.355672	0.840647	0.830525	0.500807	0.3288	0.0023056	0.81956	0.0591176	0.631872	0.0327133	0.24291	0.000870289	0.0131272	0.0825255	0.0256143	5	18	0.277778
CTSA	200661_at				0.0876154	0.0377606	0.0262938	0.0389632	0.78886	0.852496	0.502169	0.825744	0.238164	0.318428	0.274827	0.190869	0.0262506	0.152371	0.82121	0.497042	0.800035	0.00221447	5	18	0.277778
CTSG	205653_at				0.420434	0.495352	0.668144	0.286698	0.780174	0.807365	0.7289	0.646817	0.29211	0.90519	0.0205484	0.00184469	0.0179635	0.030501	0.609077	0.102503	0.135885	0.0434227	5	18	0.277778
CUL3	201370_s_at				0.234421	0.601819	0.877334	0.626614	0.811085	0.868306	0.0811752	0.0766549	0.000847874	0.970533	0.212069	0.834791	0.112653	0.169019	0.0235697	0.0239827	0.0428253	0.0116851	5	18	0.277778
CYB561	209163_at				0.345769	0.327791	0.0480908	0.01631	0.280646	0.154706	0.622067	0.201183	0.0285758	0.237747	0.0483826	0.161529	0.0247333	0.0904878	0.952422	0.857316	0.0581797	0.362501	5	18	0.277778
CYLD	213295_at				0.41974	0.326414	0.0268597	0.130751	0.754065	0.916522	0.368808	0.637067	0.0480744	0.606126	0.272375	0.501988	0.0177923	0.0100595	0.977877	0.696455	0.180224	0.00555514	5	18	0.277778
CYP1B1	202436_s_at				0.445308	0.352351	0.135858	0.722637	0.0191517	0.181983	0.027027	0.10024	0.675595	0.276599	0.0834351	0.260953	0.0087822	0.142199	0.0245659	0.0071142	0.106104	0.318576	5	18	0.277778
DBP	209782_s_at				0.970743	0.245263	0.0130057	0.00962366	0.172896	0.0430101	0.00301931	0.0930037	0.56829	0.316275	0.643908	0.650458	0.940324	0.716487	0.306518	0.0357819	0.0587863	0.459366	5	18	0.277778
DBT	205371_s_at				0.200463	0.300011	0.203167	0.482667	0.832711	0.259419	0.00137469	0.0110206	0.737327	0.159002	0.467027	0.0604043	0.967965	0.596446	0.64988	0.00264665	0.0422058	0.00811216	5	18	0.277778
DDC	205311_at				0.764759	0.340271	0.0278581	0.00965009	0.0238102	0.0441597	0.0964537	0.217427	0.0186024	0.442247	0.225593	0.398421	0.995186	0.939322	0.459172	0.976244	0.559711	0.166568	5	18	0.277778
DDR2	205168_at				0.791459	0.846321	0.327311	0.663707	0.0466908	0.502006	0.790771	0.65449	0.0296613	0.769025	0.369027	0.619361	0.0771908	0.0160452	0.0023758	0.684162	0.0271854	0.92542	5	18	0.277778
DDX21	208152_s_at				0.00557302	0.0235974	0.457941	0.0916336	0.377281	0.555575	0.196786	0.709667	0.00532999	0.877361	0.716783	0.392298	0.162397	0.225833	0.0387704	0.413887	0.519294	0.044634	5	18	0.277778
DDX31	219328_at				0.00241733	0.00743841	0.590411	0.855222	0.181263	0.968095	0.00399435	0.0775348	0.17094	0.209387	0.360639	0.747319	0.00528323	0.181732	0.0597574	0.22337	0.9892	0.0171579	5	18	0.277778
DDX41	217840_at				0.647049	0.425941	0.182594	0.0236584	0.200385	0.0305471	0.77931	0.570115	0.00965535	0.209563	0.328334	0.174934	0.170447	0.211431	0.656089	0.0303705	0.322625	0.0012276	5	18	0.277778
DEAF1	209407_s_at				0.124722	0.215846	0.00689844	0.0834931	0.0697308	0.260561	0.0272408	0.0430302	0.323357	0.375966	0.357059	0.237293	0.529323	0.224367	0.481137	0.0113923	0.749134	0.0285504	5	18	0.277778
DESI2	222158_s_at				0.991877	0.330467	0.700807	0.543225	0.14953	0.45771	0.269274	0.871494	0.0584969	0.667361	0.0198951	0.219463	0.0376402	0.271897	0.0346389	0.00954912	0.525837	0.0336045	5	18	0.277778
DGCR14	217285_at				0.278987	0.394867	0.0309856	0.641947	0.0333012	0.578318	0.150702	0.0156988	0.00358606	0.963669	0.0487503	0.526693	0.367504	0.0872968	0.757947	0.72645	0.576054	0.256496	5	18	0.277778
DIAPH2	205726_at				0.205236	0.332327	0.147431	0.529465	0.525692	0.926526	0.038378	0.0280242	0.00381315	0.479622	0.0577697	0.234999	0.00512016	0.0560412	0.32167	0.0431845	0.157148	0.347309	5	18	0.277778
DKK3	214247_s_at				0.800633	0.124844	0.019799	0.00588477	0.0137462	0.0237815	0.515386	0.0964102	0.217664	0.968195	0.250552	0.124523	0.150826	0.651992	0.0196006	0.648215	0.425251	0.724686	5	18	0.277778
DNAJB5	212817_at				0.527438	0.0320259	0.814915	0.902711	0.786437	0.914808	0.00734403	0.0104884	0.018474	0.284692	0.424868	0.665112	0.378875	0.605341	0.226745	0.00645812	0.751935	0.707959	5	18	0.277778
DNASE2	209831_x_at				0.226166	0.0254658	0.135529	0.211648	0.306508	0.770251	0.76289	0.0535868	0.000881115	0.565451	0.535956	0.0255849	0.216452	0.0768284	0.603962	0.00968491	0.948672	0.0332576	5	18	0.277778
DOPEY1	213271_s_at				0.928672	0.499114	0.240979	0.0500493	0.120326	0.0129074	0.586997	0.583386	0.0506056	0.277736	0.36106	0.88468	0.0423087	0.0459516	0.271046	0.00784601	0.372534	0.038179	5	18	0.277778
DR1	216652_s_at				0.869663	0.838884	0.173813	0.252355	0.331794	0.295881	0.216154	0.51947	0.0148847	0.0278802	0.23181	0.0357674	0.209782	0.706769	0.0122944	0.00064523	0.252275	0.364134	5	18	0.277778
DTX2P1	215667_x_at				0.83656	0.43453	0.0181651	0.237026	0.0118298	0.127117	0.102256	0.0138236	0.133165	0.745136	0.442942	0.971022	0.213946	0.012012	0.802209	0.0551365	0.965089	0.00308421	5	18	0.277778
DTX2P1-UPK3BP1-PMS2P11	215667_x_at				0.83656	0.43453	0.0181651	0.237026	0.0118298	0.127117	0.102256	0.0138236	0.133165	0.745136	0.442942	0.971022	0.213946	0.012012	0.802209	0.0551365	0.965089	0.00308421	5	18	0.277778
DYNC1I2	211684_s_at				0.769127	0.180679	0.212536	0.205907	0.99287	0.956235	0.809026	0.820279	0.0224399	0.411804	0.16119	0.282926	0.225583	0.0177793	0.0319472	0.0371283	0.313148	0.00461775	5	18	0.277778
DYNLT3	203303_at				0.305676	0.702904	0.801652	0.979008	0.492866	0.356509	0.371402	0.406695	0.0108541	0.267676	0.427913	0.123193	0.000393462	0.0831805	0.00704061	0.950381	0.0156642	0.0257527	5	18	0.277778
DYSF	218660_at				0.0383383	0.32268	0.672392	0.81212	0.505677	0.569613	0.024848	0.158363	0.0153315	0.0833585	0.44105	0.782779	0.252174	0.933155	0.407549	0.0242042	0.550097	0.00249858	5	18	0.277778
DYX1C1-CCPG1	214151_s_at				0.714493	0.491776	0.158315	0.0174369	0.268269	0.682963	0.881973	0.849649	0.00281566	0.213618	0.760655	0.0050287	0.000496075	0.109778	0.0555654	0.00152962	0.218544	0.113486	5	18	0.277778
DZIP3	213186_at				0.205316	0.922168	0.0485894	0.465009	0.724953	0.360159	0.013002	0.0142358	0.0442644	0.466153	0.45826	0.473903	0.0955244	0.00552646	0.289064	0.0705646	0.195244	0.0601444	5	18	0.277778
EFTUD1	218973_at				0.51278	0.873651	0.132308	0.0299075	0.294092	0.5144	0.883536	0.912083	0.0873242	0.167255	0.211689	0.223044	0.0202386	0.19336	0.0354036	0.0115232	0.599358	0.0339361	5	18	0.277778
EIF1AP1	201016_at				0.945161	0.655534	0.0374881	0.116588	0.886462	0.800093	0.233634	0.376452	0.102875	0.229591	0.0267819	0.981684	0.107884	0.0853026	0.0225899	0.0313385	0.346934	0.0137247	5	18	0.277778
EIF1AX	201017_at				0.633596	0.517857	0.600535	0.300169	0.809526	0.911028	0.26197	0.374663	0.00229795	0.0200572	0.0516673	0.463638	0.0109837	0.0521688	0.126157	0.0016689	0.350144	0.00122002	5	18	0.277778
EIF5A2	220198_s_at				0.349605	0.0148471	0.904301	0.0117687	0.882809	0.00221418	0.329661	0.586431	0.537869	0.866128	0.79693	0.0219847	0.00119395	0.52396	0.627638	0.751008	0.186234	0.447684	5	18	0.277778
EMX2	221950_at				0.464402	0.851331	0.003825	0.0136504	0.020825	0.0232612	0.469276	0.99977	0.055027	0.309561	0.271754	0.323135	0.0395788	0.101034	0.892813	0.0686127	0.236169	0.155799	5	18	0.277778
ENGASE	65635_at				0.22907	0.751835	0.132344	0.0570271	0.00390012	0.00424283	0.0183802	0.20778	0.0641848	0.999079	0.151641	0.379321	0.975258	0.619877	0.017865	0.224469	0.302525	0.0413893	5	18	0.277778
ENSA	202596_at				0.642139	0.931818	0.0132892	0.0315046	0.0477662	0.126915	0.459418	0.431416	0.0480618	0.599214	0.876223	0.436105	0.168842	0.383425	0.121013	0.00119548	0.898539	0.579417	5	18	0.277778
ENTPD1	209473_at				0.393535	0.913815	0.877725	0.0303225	0.677127	0.169461	0.000490198	0.0758323	0.0031981	0.796241	0.440502	0.018474	0.00570807	0.346887	0.158815	0.0658627	0.209669	0.834423	5	18	0.277778
EP400	212376_s_at				0.932385	0.851253	0.766936	0.217314	0.1976	0.706458	0.020606	0.135189	0.0109274	0.890622	0.042494	0.359631	0.642222	0.643488	0.829132	0.035481	0.459974	0.00992251	5	18	0.277778
EPB41L3	211776_s_at				0.630782	0.0139415	0.965083	0.484504	0.43503	0.320599	0.0491623	0.189208	0.0585778	0.995916	0.53556	0.00912307	2.67e-06	0.949511	0.374162	0.612702	0.00739183	0.730625	5	18	0.277778
EPHA4	206114_at				0.00582895	0.865181	0.00592161	0.424464	0.0198791	0.760527	0.950324	0.877248	0.0105826	0.37666	0.445198	0.423574	0.32623	0.37584	0.710863	0.0119322	0.0717363	0.097508	5	18	0.277778
EPM2AIP1	202909_at				0.857067	0.218538	0.01638	0.144549	0.0139342	0.106418	0.439279	0.417614	0.0690625	0.158755	0.49336	0.642254	0.280106	0.0269266	0.0354939	0.510532	0.981344	0.016793	5	18	0.277778
ERLIN1	209666_s_at				0.697123	0.418608	0.46088	0.909202	0.779296	0.307834	0.0346368	0.0294737	0.00140302	0.626691	0.501622	0.444557	0.0972598	0.452797	0.015725	0.346274	0.0088552	0.173216	5	18	0.277778
EXT1	214985_at				0.569116	0.716849	0.0230688	0.368135	0.139798	0.272862	0.0247781	0.0118748	0.0139309	0.95708	0.216534	0.796472	0.00886282	0.1594	0.346487	0.376542	0.614298	0.426758	5	18	0.277778
F11R	221664_s_at				0.586857	0.709231	0.00553746	0.0714795	0.014864	0.465059	0.0246499	0.0166253	0.483348	0.891207	0.00659761	0.263412	0.18585	0.261542	0.235057	0.409629	0.709804	0.293707	5	18	0.277778
FABP5	202345_s_at				0.214859	0.15556	0.0927941	0.0259787	0.0511283	0.00602687	0.485397	0.269458	0.0155198	0.848017	0.529952	0.570335	0.0797424	0.149475	0.419586	0.000123895	0.571986	0.0497707	5	18	0.277778
FABP5P11	202345_s_at				0.214859	0.15556	0.0927941	0.0259787	0.0511283	0.00602687	0.485397	0.269458	0.0155198	0.848017	0.529952	0.570335	0.0797424	0.149475	0.419586	0.000123895	0.571986	0.0497707	5	18	0.277778
FABP5P1	202345_s_at				0.214859	0.15556	0.0927941	0.0259787	0.0511283	0.00602687	0.485397	0.269458	0.0155198	0.848017	0.529952	0.570335	0.0797424	0.149475	0.419586	0.000123895	0.571986	0.0497707	5	18	0.277778
FABP5P2	202345_s_at				0.214859	0.15556	0.0927941	0.0259787	0.0511283	0.00602687	0.485397	0.269458	0.0155198	0.848017	0.529952	0.570335	0.0797424	0.149475	0.419586	0.000123895	0.571986	0.0497707	5	18	0.277778
FABP5P7	202345_s_at				0.214859	0.15556	0.0927941	0.0259787	0.0511283	0.00602687	0.485397	0.269458	0.0155198	0.848017	0.529952	0.570335	0.0797424	0.149475	0.419586	0.000123895	0.571986	0.0497707	5	18	0.277778
FAM106A	220575_at				0.214701	0.0760501	0.00749835	0.00084683	0.0185098	0.00322303	0.602556	0.767524	0.00134135	0.366628	0.710463	0.84719	0.889713	0.650881	0.14735	0.712487	0.918673	0.451296	5	18	0.277778
FAM106B	220575_at				0.214701	0.0760501	0.00749835	0.00084683	0.0185098	0.00322303	0.602556	0.767524	0.00134135	0.366628	0.710463	0.84719	0.889713	0.650881	0.14735	0.712487	0.918673	0.451296	5	18	0.277778
FAM114A2	218588_s_at				0.90161	0.263128	0.198507	0.121704	0.890525	0.977772	0.00646101	0.0673297	0.314679	0.651211	0.0100403	0.250737	0.000937618	0.0817549	0.0923218	0.00257553	0.0891668	0.000703497	5	18	0.277778
FAM13B	218518_at				0.260899	0.696443	0.72823	0.209541	0.496419	0.239281	0.934589	0.959228	0.00369592	0.207916	0.831544	0.0274882	0.091712	0.0142577	0.175327	0.00352512	0.865984	0.000659982	5	18	0.277778
FAM193B	218920_at				0.897667	0.725785	0.0343374	0.0461525	0.0367615	0.158014	0.0302709	0.163098	0.1121	0.27145	0.54382	0.95209	0.0783831	0.259042	0.873423	0.000400781	0.453924	0.444228	5	18	0.277778
FAM208A	209284_s_at				0.944254	0.978501	0.00363128	0.342068	0.0295667	0.946374	0.260444	0.43075	0.00336476	0.520187	0.176711	0.0180716	0.129211	0.563389	0.00536971	0.749057	0.055927	0.0775476	5	18	0.277778
FAM65B	209829_at				0.268831	0.930689	0.432556	0.907705	0.713541	0.223577	0.0068842	0.00695679	0.238223	0.544128	0.290857	0.277885	0.0596456	0.0463902	0.0243094	0.849158	0.039433	0.439866	5	18	0.277778
FAM82B	218549_s_at				0.520878	0.241843	0.194494	0.818152	0.576591	0.893176	0.0266995	0.0585362	0.0368965	0.854817	0.61229	0.0237611	0.212633	0.621433	0.0151136	0.842046	0.0257598	0.749789	5	18	0.277778
FAS	204781_s_at				0.169822	0.824284	0.606695	0.508626	0.290852	0.142373	0.499707	0.30872	0.751872	0.909023	0.141521	0.778036	0.0216812	0.00143922	0.00184046	0.000105768	0.00122497	0.219228	5	18	0.277778
FASTKD1	219002_at				0.927036	0.671858	0.110763	0.607495	0.681564	0.779253	0.0365116	0.00125988	0.543353	0.827698	0.0142663	0.206947	0.609122	0.0843466	0.0785967	0.00707534	0.60285	0.000198647	5	18	0.277778
FAT1	201579_at				0.760285	0.806566	0.253761	0.223086	0.132854	0.179821	0.228056	0.389448	0.00971345	0.732242	0.0964517	0.021064	0.0176187	0.946453	0.199205	0.0450955	0.796961	0.0103444	5	18	0.277778
FBXO11	222119_s_at				0.592884	0.556114	0.0389571	0.117983	0.335877	0.611768	0.0405811	0.0504097	0.0750631	0.0181152	0.669819	0.0819144	0.132159	0.419775	0.0179034	0.0595612	0.186904	0.0104041	5	18	0.277778
FCER1G	204232_at				0.377995	0.0114273	0.573508	0.988885	0.551555	0.678545	0.0942585	0.0403623	0.0437325	0.806597	0.272686	0.0414842	0.00220554	0.339233	0.161654	0.869778	0.911091	0.0694429	5	18	0.277778
FCGR2B	211395_x_at				0.443139	0.227818	0.394606	0.595935	0.445861	0.912098	0.0277685	0.112582	0.00907265	0.926492	0.204049	0.011024	0.021047	0.0239991	0.21055	0.164743	0.40839	0.23265	5	18	0.277778
FCN1	205237_at				0.328459	0.716891	0.0411714	0.194278	0.15553	0.243595	0.733688	0.354886	0.00797136	0.0578799	0.487361	0.0324406	0.165672	0.100006	0.503408	0.00945974	0.070979	0.0002743	5	18	0.277778
FDX1	203646_at				0.98071	0.543243	0.584569	0.894594	0.328921	0.4189	0.0464794	0.057572	0.0178977	0.111175	0.0290886	0.0291553	0.0705736	0.841928	0.0244995	0.499798	0.101582	0.0785083	5	18	0.277778
FES	205418_at				0.918518	0.513963	0.568122	0.585245	0.589127	0.943244	0.0197298	0.0316151	0.00564624	0.326747	0.778752	0.223152	0.385697	0.168966	0.0270959	0.150019	0.276949	0.00581067	5	18	0.277778
FEZ1	203562_at				0.214795	0.309515	0.0169751	0.46129	0.986876	0.390496	0.63333	0.71135	0.0915995	0.757019	0.781462	0.000150608	0.00131652	0.0287651	0.045858	0.768415	0.860088	0.421501	5	18	0.277778
FEZ2	202305_s_at				0.715619	0.228567	0.125749	0.588254	0.275758	0.982566	0.00261935	0.0185514	0.599053	0.330584	0.00355831	0.647387	0.0183697	0.698986	0.0959958	0.358464	0.923767	0.00312755	5	18	0.277778
FILIP1L	204135_at				0.800338	0.337466	0.613238	0.404377	0.637659	0.887431	0.590301	0.558304	0.426635	0.176571	0.843592	0.00442554	0.0375179	0.16242	0.00265797	0.0433615	0.235297	0.0244729	5	18	0.277778
FKBP3	218003_s_at				0.979305	0.453231	0.0232283	0.36479	0.0164138	0.150961	0.676738	0.89321	0.378847	0.371159	0.0832833	0.632973	0.097522	0.628273	0.00566863	0.0498129	0.301937	0.00792554	5	18	0.277778
FNBP1L	215017_s_at				0.645223	0.795568	0.0026891	0.87382	0.977425	0.165427	0.0561127	0.0194503	0.0216239	0.354502	0.244621	0.701088	0.335161	0.896885	0.00242598	0.0187775	0.82226	0.194465	5	18	0.277778
FSCN1	201564_s_at				0.867867	0.815382	0.014885	0.0514425	0.0066071	0.00699452	0.353685	0.910608	0.00593191	0.255337	0.731404	0.640194	0.453631	0.0714952	0.875389	0.378306	0.0103862	0.170883	5	18	0.277778
FTH1P5	211628_x_at				0.933432	0.897425	0.0933048	0.657435	0.00882866	0.609543	0.0121613	0.328782	0.279204	0.605861	0.284356	0.03891	0.0467752	0.122665	0.156628	0.160656	0.268984	0.000190032	5	18	0.277778
FTL	212788_x_at				0.69316	0.350869	0.540165	0.635508	0.0409822	0.357089	0.788932	0.237146	0.0381362	0.0502198	0.570702	0.00518471	0.005736	0.094888	0.969737	0.754008	0.418098	0.000135221	5	18	0.277778
FTLP3	212788_x_at				0.69316	0.350869	0.540165	0.635508	0.0409822	0.357089	0.788932	0.237146	0.0381362	0.0502198	0.570702	0.00518471	0.005736	0.094888	0.969737	0.754008	0.418098	0.000135221	5	18	0.277778
FYB	211795_s_at				0.148284	0.454989	0.0303194	0.0291795	0.353207	0.294175	0.273462	0.0652937	0.490833	0.293435	0.398134	0.00720877	0.0126966	0.584385	0.0128888	0.611133	0.254676	0.335662	5	18	0.277778
GAGE1	207086_x_at				0.323843	0.42607	0.035196	0.226295	0.0349191	0.188797	0.877307	0.884573	0.0328241	0.645091	0.883765	0.0465201	0.0345482	0.113906	0.616635	0.473341	0.945519	0.0701465	5	18	0.277778
GAGE12C	207086_x_at				0.323843	0.42607	0.035196	0.226295	0.0349191	0.188797	0.877307	0.884573	0.0328241	0.645091	0.883765	0.0465201	0.0345482	0.113906	0.616635	0.473341	0.945519	0.0701465	5	18	0.277778
GAGE12D	207086_x_at				0.323843	0.42607	0.035196	0.226295	0.0349191	0.188797	0.877307	0.884573	0.0328241	0.645091	0.883765	0.0465201	0.0345482	0.113906	0.616635	0.473341	0.945519	0.0701465	5	18	0.277778
GAGE12E	207086_x_at				0.323843	0.42607	0.035196	0.226295	0.0349191	0.188797	0.877307	0.884573	0.0328241	0.645091	0.883765	0.0465201	0.0345482	0.113906	0.616635	0.473341	0.945519	0.0701465	5	18	0.277778
GAGE12F	207086_x_at				0.323843	0.42607	0.035196	0.226295	0.0349191	0.188797	0.877307	0.884573	0.0328241	0.645091	0.883765	0.0465201	0.0345482	0.113906	0.616635	0.473341	0.945519	0.0701465	5	18	0.277778
GAGE12G	207086_x_at				0.323843	0.42607	0.035196	0.226295	0.0349191	0.188797	0.877307	0.884573	0.0328241	0.645091	0.883765	0.0465201	0.0345482	0.113906	0.616635	0.473341	0.945519	0.0701465	5	18	0.277778
GAGE12H	207086_x_at				0.323843	0.42607	0.035196	0.226295	0.0349191	0.188797	0.877307	0.884573	0.0328241	0.645091	0.883765	0.0465201	0.0345482	0.113906	0.616635	0.473341	0.945519	0.0701465	5	18	0.277778
GAGE12I	207086_x_at				0.323843	0.42607	0.035196	0.226295	0.0349191	0.188797	0.877307	0.884573	0.0328241	0.645091	0.883765	0.0465201	0.0345482	0.113906	0.616635	0.473341	0.945519	0.0701465	5	18	0.277778
GAGE12J	207086_x_at				0.323843	0.42607	0.035196	0.226295	0.0349191	0.188797	0.877307	0.884573	0.0328241	0.645091	0.883765	0.0465201	0.0345482	0.113906	0.616635	0.473341	0.945519	0.0701465	5	18	0.277778
GAGE13	207086_x_at				0.323843	0.42607	0.035196	0.226295	0.0349191	0.188797	0.877307	0.884573	0.0328241	0.645091	0.883765	0.0465201	0.0345482	0.113906	0.616635	0.473341	0.945519	0.0701465	5	18	0.277778
GAGE2A	207086_x_at				0.323843	0.42607	0.035196	0.226295	0.0349191	0.188797	0.877307	0.884573	0.0328241	0.645091	0.883765	0.0465201	0.0345482	0.113906	0.616635	0.473341	0.945519	0.0701465	5	18	0.277778
GAGE2B	207086_x_at				0.323843	0.42607	0.035196	0.226295	0.0349191	0.188797	0.877307	0.884573	0.0328241	0.645091	0.883765	0.0465201	0.0345482	0.113906	0.616635	0.473341	0.945519	0.0701465	5	18	0.277778
GAGE2C	207086_x_at				0.323843	0.42607	0.035196	0.226295	0.0349191	0.188797	0.877307	0.884573	0.0328241	0.645091	0.883765	0.0465201	0.0345482	0.113906	0.616635	0.473341	0.945519	0.0701465	5	18	0.277778
GAGE2D	207086_x_at				0.323843	0.42607	0.035196	0.226295	0.0349191	0.188797	0.877307	0.884573	0.0328241	0.645091	0.883765	0.0465201	0.0345482	0.113906	0.616635	0.473341	0.945519	0.0701465	5	18	0.277778
GAGE2E	207086_x_at				0.323843	0.42607	0.035196	0.226295	0.0349191	0.188797	0.877307	0.884573	0.0328241	0.645091	0.883765	0.0465201	0.0345482	0.113906	0.616635	0.473341	0.945519	0.0701465	5	18	0.277778
GAGE4	207086_x_at				0.323843	0.42607	0.035196	0.226295	0.0349191	0.188797	0.877307	0.884573	0.0328241	0.645091	0.883765	0.0465201	0.0345482	0.113906	0.616635	0.473341	0.945519	0.0701465	5	18	0.277778
GALNT12	218885_s_at				0.0772491	0.046004	0.0431006	0.598275	0.523145	0.196499	0.212889	0.461159	0.0195965	0.0340132	0.173452	0.195737	0.0900603	0.647837	0.131856	0.421394	0.443617	0.0330702	5	18	0.277778
GARS	208693_s_at				0.891159	0.76227	0.0409797	0.957653	0.0172121	0.678424	0.360617	0.843875	0.332617	0.0740422	0.711651	0.0117449	0.0227526	0.953663	0.0243417	0.846639	0.885845	0.425806	5	18	0.277778
GBA	210589_s_at				0.948792	0.255364	0.0140563	0.494302	0.0254205	0.666334	0.0223866	0.00783238	0.39914	0.780448	0.250709	0.218204	0.0178592	0.22619	0.455137	0.735203	0.75061	0.126173	5	18	0.277778
GBAP1	210589_s_at				0.948792	0.255364	0.0140563	0.494302	0.0254205	0.666334	0.0223866	0.00783238	0.39914	0.780448	0.250709	0.218204	0.0178592	0.22619	0.455137	0.735203	0.75061	0.126173	5	18	0.277778
GEMIN4	217099_s_at				0.13752	0.279427	0.188277	0.0109875	0.0223713	0.0022949	0.192598	0.196838	0.586775	0.0742158	0.0339562	0.214143	0.371862	0.533323	0.0596136	0.0555463	0.0461478	0.552645	5	18	0.277778
GGA1	217560_at				0.939842	0.288415	0.00719222	0.0154696	0.097058	0.170147	0.475762	0.567943	0.0314036	0.903761	0.743573	0.0297859	0.185239	0.111886	0.943492	0.0211667	0.546796	0.768328	5	18	0.277778
GGA2	210658_s_at				0.337909	0.483264	0.00532472	4.12e-05	0.0957763	0.00692573	0.0439229	0.0495897	0.107376	0.585749	0.0784727	0.781502	0.223913	0.208974	0.50778	0.965848	0.429991	0.432496	5	18	0.277778
GGCX	205351_at				0.670299	0.160428	0.00283419	0.144068	0.0358644	0.5938	0.54557	0.812961	0.0351899	0.744405	0.656138	0.211324	0.0269283	0.256284	0.0821372	0.00735664	0.969169	0.634976	5	18	0.277778
GGPS1	202322_s_at				0.628706	0.20661	0.0917649	0.204408	0.133908	0.270998	0.669225	0.924317	0.0257299	0.910996	0.40411	0.282117	0.662878	0.0155828	0.0202425	0.00737993	0.033538	0.202851	5	18	0.277778
GHITM	209248_at				0.599176	0.259567	0.662719	0.624107	0.110381	0.13403	0.0155621	0.0383789	0.0111506	0.115147	0.301057	0.839614	0.593763	0.208191	0.0918477	0.00768113	0.00656184	0.627336	5	18	0.277778
GIGYF2	212260_at				0.567951	0.373706	0.327007	0.0168886	0.765272	0.0665803	0.109293	0.344955	0.0287564	0.84332	0.0819451	0.0409266	0.0147209	0.52383	0.313946	0.00816591	0.569522	0.0775799	5	18	0.277778
GIN1	219467_at				0.290068	0.300401	0.810408	0.523719	0.639453	0.278899	0.0261496	0.0154189	0.00236634	0.679094	0.137222	0.63092	0.673666	0.240115	0.0257983	0.00477252	0.103551	0.106781	5	18	0.277778
GLIPR1	204222_s_at				0.862498	0.279509	0.151001	0.362119	0.179975	0.452689	0.0554828	0.0020593	0.193317	0.933149	0.0463188	0.0124195	0.00762657	0.839102	0.403469	0.0223415	0.599336	0.902707	5	18	0.277778
GLRX5	221932_s_at				0.916775	0.424296	0.979083	0.248152	0.185585	0.0296828	0.210729	0.0224125	0.0224214	0.999275	0.110316	0.184945	0.0313271	0.618105	0.218403	0.59871	0.159507	0.0485423	5	18	0.277778
GLUD1	200946_x_at				0.312161	0.793824	0.0415402	0.74806	0.186389	0.550473	0.0161229	0.0494399	0.0201881	0.797991	0.612788	0.65457	0.0676475	0.268431	0.432161	0.000696813	0.569159	0.833427	5	18	0.277778
GLYAT	206930_at				0.0413357	0.0499396	0.0921165	0.443673	0.102488	0.810415	0.978418	0.402633	0.114723	0.617362	0.0397969	0.735297	0.561255	0.0281917	0.0383188	0.0594159	0.678577	0.391338	5	18	0.277778
GNA15	205349_at				0.491441	0.469659	0.0973909	0.330078	0.0303899	0.146182	0.722081	0.00951683	0.0121813	0.483157	0.600139	0.0106215	0.204058	0.359447	0.479527	0.00723479	0.233059	0.82411	5	18	0.277778
GNAI3	201180_s_at				0.37381	0.838887	0.779999	0.952726	0.20099	0.283046	0.896049	0.347378	0.0218699	0.825782	0.140447	0.689341	0.215186	0.0199511	0.00597664	0.0440207	0.0598436	0.0323474	5	18	0.277778
GNAS	214548_x_at				0.000189272	0.00061566	0.363438	0.996316	0.751724	0.67638	0.371819	0.932177	0.00197466	0.497513	0.121302	0.690546	0.175104	0.282443	0.876372	0.00281983	0.488862	0.049233	5	18	0.277778
GOLGA4	201567_s_at				0.253017	0.627094	0.959725	0.743569	0.247265	0.41909	0.819266	0.320606	0.00515007	0.397278	0.0282607	0.0506752	0.0883084	0.067319	0.00215266	0.0122723	0.184498	0.00259031	5	18	0.277778
GOLGA8A	210425_x_at				0.698391	0.00731137	0.32736	0.243156	0.0818837	0.0544621	0.599975	0.971495	0.00537912	0.151219	0.38776	0.986231	0.0365737	0.570523	0.00598337	0.368992	0.205385	0.0192269	5	18	0.277778
GOLGA8B	210425_x_at				0.698391	0.00731137	0.32736	0.243156	0.0818837	0.0544621	0.599975	0.971495	0.00537912	0.151219	0.38776	0.986231	0.0365737	0.570523	0.00598337	0.368992	0.205385	0.0192269	5	18	0.277778
GPATCH2	219078_at				0.488281	0.0885066	0.521066	0.643774	0.363091	0.865935	0.0479287	0.927486	0.00185506	0.0572931	0.307151	0.608454	0.0207567	0.076243	0.856587	0.546599	0.023589	0.0202766	5	18	0.277778
GPR183	205419_at				0.49802	0.794774	0.192203	0.153532	0.236489	0.545798	0.0454942	0.0863407	0.188384	0.0252994	0.965329	0.0472314	0.00163294	0.908889	0.816295	0.323795	0.660566	0.0421034	5	18	0.277778
GPR89A	220642_x_at				0.604058	0.0495467	0.80162	0.0956992	0.797875	0.183989	0.427381	0.96758	8.26e-05	0.838694	0.123392	0.245324	0.27599	0.0366127	0.389149	0.0392942	0.199135	0.00404934	5	18	0.277778
GPR89B	220642_x_at				0.604058	0.0495467	0.80162	0.0956992	0.797875	0.183989	0.427381	0.96758	8.26e-05	0.838694	0.123392	0.245324	0.27599	0.0366127	0.389149	0.0392942	0.199135	0.00404934	5	18	0.277778
GPR89C	220642_x_at				0.604058	0.0495467	0.80162	0.0956992	0.797875	0.183989	0.427381	0.96758	8.26e-05	0.838694	0.123392	0.245324	0.27599	0.0366127	0.389149	0.0392942	0.199135	0.00404934	5	18	0.277778
GRIA3	206730_at				0.0323855	0.0145915	0.015619	0.527632	0.214158	0.227557	0.0800013	0.0720162	0.465865	0.0216293	0.669714	0.0421011	0.166081	0.067887	0.403082	0.537088	0.85777	0.0776326	5	18	0.277778
GRIN2B	210411_s_at				0.120599	0.0120878	0.510884	0.966104	0.948789	0.937937	0.034383	0.394663	0.00100473	0.753325	0.469585	0.898001	0.0198288	0.522708	0.00897536	0.776565	0.83224	0.753482	5	18	0.277778
GRM8	216992_s_at				0.724148	0.327177	0.953718	0.792416	0.163039	0.415099	0.0258944	0.0323178	0.094817	0.134404	0.353514	0.0105461	0.361805	0.0220935	0.727397	0.0459927	0.798103	0.198583	5	18	0.277778
GRSF1	215030_at				0.206676	0.979259	0.0375804	0.527736	0.797254	0.593804	0.806179	0.187106	0.00048911	0.360777	0.0544324	0.885501	0.16298	0.0296514	0.0257412	0.534624	0.250694	0.0168513	5	18	0.277778
GSR	205770_at				0.313249	0.581712	0.0041781	0.0489711	0.539903	0.895331	0.938952	0.868597	0.790833	0.398212	0.606466	0.0437603	0.221871	0.938913	0.0334522	0.00832594	0.820296	0.773473	5	18	0.277778
GTF2E1	205930_at				0.600932	0.543431	0.538825	0.532576	0.697449	0.799571	0.818762	0.871182	0.0197176	0.348932	0.074608	0.0495719	0.051444	0.378468	0.0226461	0.00020026	0.266657	0.00626945	5	18	0.277778
HAGH	205012_s_at				0.0101302	0.0126271	0.333848	0.929603	0.0256556	0.131655	0.244493	0.00839172	0.0455043	0.373625	0.250253	0.66679	0.260484	0.245601	0.132042	0.116854	0.240653	0.381601	5	18	0.277778
HBD	206834_at				0.879463	0.101222	0.401014	0.0886784	0.237963	0.0554968	0.039212	0.166876	0.0941318	0.0455335	0.107548	0.251298	0.396297	0.0109245	0.526527	0.0378509	0.609251	0.000644305	5	18	0.277778
HBG1	213515_x_at				0.96021	0.3235	0.899815	0.677735	0.29018	0.0847614	0.024077	0.440533	0.0196667	0.00726329	0.482987	0.536847	0.652962	0.0151566	0.213055	0.321727	0.113075	0.00106539	5	18	0.277778
HBG2	213515_x_at				0.96021	0.3235	0.899815	0.677735	0.29018	0.0847614	0.024077	0.440533	0.0196667	0.00726329	0.482987	0.536847	0.652962	0.0151566	0.213055	0.321727	0.113075	0.00106539	5	18	0.277778
HCAR2	205220_at				0.655568	0.755971	0.119771	0.0125781	0.357617	0.0222007	0.949542	0.871595	0.0352021	0.775667	0.011145	0.823634	0.405244	0.983049	0.120349	0.000174009	0.445374	0.234587	5	18	0.277778
HCAR3	205220_at				0.655568	0.755971	0.119771	0.0125781	0.357617	0.0222007	0.949542	0.871595	0.0352021	0.775667	0.011145	0.823634	0.405244	0.983049	0.120349	0.000174009	0.445374	0.234587	5	18	0.277778
HCLS1	202957_at				0.495813	0.213005	0.019871	0.0129617	0.254417	0.172451	0.995695	0.924213	0.973177	0.291327	0.312482	0.00554891	0.00153783	0.593306	0.0933346	0.546609	0.255687	0.0393022	5	18	0.277778
HEATR6	65493_at				0.525123	0.608461	0.0022122	0.0357469	0.0136785	0.036193	0.90833	0.24318	0.888733	0.500637	0.928443	0.311597	0.139861	0.245393	0.91363	0.00185761	0.0501587	0.484074	5	18	0.277778
HEY1	44783_s_at				0.705966	0.152014	0.0129641	0.0134621	0.0501056	0.0143827	0.903821	0.909304	0.875162	0.599266	0.471118	0.521217	0.0296158	0.771389	0.0084726	0.545628	0.894566	0.503389	5	18	0.277778
HFE	211331_x_at				0.397044	0.56934	0.263705	0.150484	0.306934	0.333393	0.0497918	0.0474412	0.0333052	0.220397	0.422161	0.504826	0.0338821	0.209245	0.691184	0.00686234	0.709809	0.294108	5	18	0.277778
HLA-C	216526_x_at				0.521153	0.439082	0.036597	0.0012271	0.293416	0.0441125	0.329077	0.583877	0.303259	0.170578	0.689127	0.490261	0.66643	0.129459	0.928901	0.00283199	0.380283	0.00645613	5	18	0.277778
HLA-DOB	205671_s_at				0.871913	0.862902	0.483845	0.376639	0.0308075	0.852539	0.857677	0.438989	0.00457101	0.0357221	0.48092	0.0540138	0.0300623	0.0626956	0.708635	0.00191709	0.868316	0.302653	5	18	0.277778
HLA-E	217456_x_at				0.0229383	0.0212842	0.0642613	0.00473085	0.0595335	0.00311862	0.120243	0.107745	0.879765	0.308207	0.440844	0.983106	0.687576	0.108026	0.709113	0.223128	0.311283	0.0218066	5	18	0.277778
HLA-G	210514_x_at				0.0852113	0.0205486	0.0443094	0.25294	0.56917	0.549871	0.0330557	0.113832	0.264626	0.396317	0.668474	0.88378	0.354596	0.107237	0.429334	0.0482352	0.203542	0.0457542	5	18	0.277778
HMGXB4	212597_s_at				0.379366	0.13095	0.0166563	0.0326939	0.219318	0.134656	0.0641014	0.375654	0.0200029	0.888574	0.157808	0.149643	0.06838	0.218966	0.0231092	0.356616	0.388659	0.0101779	5	18	0.277778
HMHA1	212873_at				0.59333	0.14029	0.0739406	0.0156892	0.804076	0.129418	0.273224	0.0268911	0.024702	0.389956	0.99172	0.016572	0.0353424	0.0781673	0.546725	0.747806	0.21458	0.0803193	5	18	0.277778
HMOX1	203665_at				0.790247	0.317804	0.120924	0.0094956	0.109793	0.757206	0.207721	0.893671	0.23187	0.3296	0.518739	0.0232273	0.0126817	0.0220336	0.240434	9.42e-06	0.284205	0.133514	5	18	0.277778
HN1L	212109_at				0.568423	0.00982404	0.417818	0.0674327	0.0108045	0.0308023	0.749996	0.470746	0.437292	0.600893	0.594906	0.232997	0.802165	0.0364375	0.578537	0.00679654	0.804847	0.877748	5	18	0.277778
HNRNPA3	211932_at				0.877515	0.361745	0.420368	0.137497	0.126929	0.0261665	0.702715	0.552344	0.122074	0.231611	0.179246	0.522163	0.192617	0.0386086	0.0366846	0.0309486	0.0532311	0.0314482	5	18	0.277778
HOXB9	216417_x_at				0.212817	0.0619079	0.0332853	0.0558677	0.00252973	0.149482	0.370457	0.470995	0.014783	0.796023	0.21888	0.0802569	0.0248071	0.971257	0.0336214	0.0677373	0.628253	0.848211	5	18	0.277778
HYAL4	220249_at				0.483567	0.0177438	0.00936088	0.401114	0.00483589	0.20615	0.30944	0.309687	0.00294461	0.460506	0.275304	0.676892	0.00619996	0.354206	0.782469	0.647607	0.65802	0.113984	5	18	0.277778
IDE	217496_s_at				0.139331	0.132164	0.405878	0.0363665	0.882665	0.23239	0.973242	0.541077	0.034451	0.853232	0.38278	0.0533553	0.0119461	0.532291	0.286607	0.00522297	0.173368	0.0230564	5	18	0.277778
IDUA	205057_s_at				0.969229	0.304785	0.00774784	0.0364368	0.063797	0.427708	0.373918	0.472714	0.0129802	0.979334	0.0365364	0.242991	0.319595	0.131532	0.376043	0.00683983	0.716334	0.581723	5	18	0.277778
IFI16	208966_x_at				0.390996	0.913939	0.966832	0.116343	0.555983	0.034426	0.936033	0.852452	0.660601	0.0484249	0.853709	0.00942397	0.0636476	0.487429	0.00601689	0.00693354	0.65999	0.620208	5	18	0.277778
IFI6	204415_at				0.00928085	0.0461257	0.0168371	0.112289	0.038574	0.11519	0.881999	0.432484	0.765356	0.927547	0.798926	0.858476	0.966795	0.78321	0.987088	0.0101266	0.196613	0.161857	5	18	0.277778
IFNG	210354_at				0.748007	0.702219	0.301598	0.665011	0.890579	0.630718	0.00371501	0.341982	0.0401638	0.0510578	0.0489973	0.919164	0.248592	0.0391329	0.852121	0.0325664	0.279902	0.198824	5	18	0.277778
IFT74	61732_r_at				0.00666847	0.323759	0.0370498	0.0871891	0.914107	0.364727	0.0115761	0.00961144	0.00696797	0.86643	0.576391	0.880856	0.482548	0.931221	0.353761	0.244203	0.108129	0.957568	5	18	0.277778
IGHV1-69	211634_x_at				0.577227	0.710093	0.494442	0.51849	0.21775	0.860417	0.00773917	0.00152721	0.0126295	0.408352	0.725889	0.152775	0.0411556	0.0467494	0.582353	0.601478	0.979524	0.758195	5	18	0.277778
IGSF6	206420_at				0.122011	0.296772	0.0268257	0.129709	0.590842	0.491301	0.0554482	0.0254603	0.570538	0.51834	0.165223	0.0334103	0.00104994	0.895579	0.0262552	0.349154	0.998812	0.308638	5	18	0.277778
IL17RA	205707_at				0.0522814	0.665228	0.897295	0.0429582	0.664678	0.279591	0.0122239	0.0902415	0.0120618	0.0724053	0.376962	0.402525	0.345314	0.00846719	0.551506	0.770033	0.149136	0.0364924	5	18	0.277778
IMPA1	203011_at				0.885672	0.192604	0.750314	0.664615	0.806113	0.402783	0.0647964	0.025372	0.00269016	0.027479	0.0511572	0.722096	0.25396	0.121074	0.609673	0.0336069	0.0765716	0.0407813	5	18	0.277778
ING3	205070_at				0.0397298	0.387314	0.539909	0.0208737	0.190032	0.00802126	0.33394	0.405675	0.0349491	0.368038	0.218928	0.252946	0.453553	0.267549	0.418761	0.0100523	0.101202	0.0780846	5	18	0.277778
INTS9	203941_at				0.346186	0.359233	0.255544	0.254999	0.386271	0.54064	0.663373	0.976445	0.613034	0.278879	0.0710337	0.0368219	0.207905	0.0157989	0.0110161	0.00718664	0.381409	0.0139055	5	18	0.277778
IPCEF1	214735_at				0.0391047	0.720584	0.607813	0.0270251	0.565988	0.0344965	0.631463	0.494526	0.0447445	0.390686	0.445084	0.0822038	0.375089	0.445094	0.00480152	0.0948356	0.2769	0.071763	5	18	0.277778
IRF1	202531_at				0.842014	0.905367	0.571834	0.456124	0.517771	0.498672	0.0839666	0.295284	0.493566	0.00339041	0.911354	0.0181744	0.00843678	0.382827	0.985749	0.00460683	0.650931	0.0127212	5	18	0.277778
ITGAE	205055_at				0.824969	0.719957	0.0402524	0.48256	0.00341268	0.0717344	0.198794	0.334673	0.00558274	0.0780386	0.213884	0.382582	0.271118	0.0149429	0.100072	0.264088	0.732121	0.0264927	5	18	0.277778
ITM2B	217731_s_at				0.0554004	0.968957	0.312487	0.380899	0.0417672	0.0339301	0.48429	0.440844	0.0263073	0.445903	0.570591	0.410637	0.793718	0.402736	0.00143017	0.0289536	0.998053	0.849225	5	18	0.277778
JUND	203751_x_at				0.0446682	0.0291237	0.718746	0.846398	0.635966	0.825301	0.0772232	0.0107945	0.689789	0.61918	0.16432	0.679737	0.780681	0.0850473	0.958868	6.82e-05	0.792171	0.0157038	5	18	0.277778
KANSL2	221821_s_at				0.326014	0.231941	0.00438522	0.084802	0.0748148	0.703998	0.989247	0.683416	0.00515661	0.550348	0.277937	0.28757	0.516842	0.00439204	0.0273992	0.195897	0.734425	0.0104886	5	18	0.277778
KCMF1	217938_s_at				0.43068	0.665711	0.0305015	0.0817665	0.0405264	0.0542655	0.532491	0.426198	0.0521923	0.118674	0.243944	0.439136	0.00769111	0.511254	0.124029	0.252321	0.00555284	0.0205652	5	18	0.277778
KCNAB2	211791_s_at				0.969955	0.769473	0.0246718	0.0391006	0.00711773	0.00633391	0.825621	0.910622	0.00710971	0.976944	0.289664	0.495324	0.515063	0.323291	0.443098	0.275584	0.779171	0.583174	5	18	0.277778
KDM3A	212689_s_at				0.369629	0.118791	0.0249358	0.018198	0.845198	0.442337	0.0552536	0.182464	0.0528207	0.446196	0.780933	0.626319	0.0128052	0.0242188	0.625744	0.75933	0.925923	0.0285244	5	18	0.277778
KIAA0196	201985_at				0.469762	0.23109	0.0750265	0.171336	0.716719	0.521275	0.0938312	0.238203	0.00581975	0.436302	0.162418	0.00600038	0.00342984	0.0298805	0.118825	0.347693	0.241542	0.0103983	5	18	0.277778
KIAA0947	209654_at				0.662763	0.54943	0.00353955	0.219893	0.529919	0.767911	0.553797	0.533724	0.0261705	0.36368	0.409108	0.839283	0.212353	0.0213599	0.0844386	0.0234042	0.176381	0.00481894	5	18	0.277778
KIT	205051_s_at				0.784047	0.877067	0.409918	0.714631	0.287723	0.474987	0.589478	0.617956	0.932024	0.0239703	0.0284824	0.0225191	0.000828334	0.19978	0.0296337	0.607823	0.101822	0.769612	5	18	0.277778
KLF6	208961_s_at				0.32121	0.624928	0.0211439	0.117552	0.139362	0.146311	0.00666396	0.0212582	0.287484	0.216915	0.892162	0.735038	0.994724	0.671398	0.438788	0.0104451	0.584228	0.00734665	5	18	0.277778
KLHDC10	209256_s_at				0.847043	0.787466	0.0125091	0.130686	0.0415169	0.121933	0.787171	0.730836	0.156262	0.629405	0.895769	0.622909	0.00720753	0.00262732	0.11178	0.000508806	0.412518	0.484271	5	18	0.277778
KPNA3	221502_at				0.461841	0.126853	0.941672	0.661879	0.647747	0.280107	0.557586	0.713065	0.00336025	0.815345	0.996257	0.789958	0.0326179	0.0445606	0.326388	0.705329	0.0235925	0.000103748	5	18	0.277778
KRAS	204009_s_at				0.655732	0.667723	0.335332	0.520273	0.919485	0.983084	0.886349	0.490298	0.0277965	0.779042	0.259411	0.305025	0.0257743	0.110419	0.00196485	0.362639	0.0107115	0.000204092	5	18	0.277778
KRT1	205900_at				0.0189494	0.0275463	0.56414	0.101499	0.920574	0.364838	0.2325	0.463902	0.00605727	0.532167	0.201128	0.279264	0.401598	0.524472	0.90558	0.0326456	0.585022	0.0154073	5	18	0.277778
LAMA2	213519_s_at				0.229222	0.0398262	0.191756	0.0901656	0.102905	0.170504	0.290552	0.899259	0.682108	0.295199	0.774267	0.263843	0.0353404	0.497015	0.0275263	0.0201558	0.484124	0.0322903	5	18	0.277778
LAMB2	216264_s_at				0.429788	0.918386	0.000708344	0.109905	0.00516099	0.207077	0.000448997	0.0268115	0.0785932	0.468132	0.170571	0.440291	0.00127957	0.382349	0.539186	0.122148	0.228802	0.509374	5	18	0.277778
LAMC1	200771_at				0.407407	0.668336	0.225676	0.955657	0.0163742	0.030249	0.819679	0.516369	0.0736789	0.633867	0.514737	0.177615	0.640629	0.0462028	0.0149606	0.0289467	0.0692145	0.374748	5	18	0.277778
LAMP1	201552_at				0.00985257	0.578975	0.728641	0.591098	0.0983237	0.067073	0.674464	0.930334	0.0359827	0.337802	0.319676	0.00213574	0.0312422	0.219651	0.320165	2.46e-05	0.937332	0.44848	5	18	0.277778
LAMP2	203042_at				0.717882	0.465823	0.43943	0.351776	0.868747	0.672863	0.312859	0.319266	0.030489	0.916602	0.0379578	0.0302848	0.0116264	0.278998	0.00300236	0.98132	0.320482	0.564111	5	18	0.277778
LAPTM5	201720_s_at				0.114635	0.102385	0.123773	0.00690009	0.379749	0.260061	0.0627611	0.0252757	0.0337067	0.833493	0.333866	0.0194697	0.00220266	0.159735	0.0905747	0.183751	0.509843	0.0621387	5	18	0.277778
LCP2	205269_at				0.832855	0.51272	0.416244	0.0370316	0.529611	0.0193096	0.600549	0.766409	0.05283	0.165103	0.878765	0.0499859	0.00654356	0.208157	0.0611612	0.0194716	0.211093	0.232503	5	18	0.277778
LEP	207092_at				0.217803	0.129641	0.0102015	0.479991	0.0206231	0.425118	0.884076	0.507968	0.00471586	0.127059	0.285453	0.0485158	0.0280056	0.557703	0.381134	0.164379	0.127637	0.410291	5	18	0.277778
LGMN	201212_at				0.377396	0.0397863	0.970843	0.41669	0.0388761	0.422976	0.647673	0.580593	0.968454	0.934013	0.357107	0.0111127	0.00460654	0.0270994	0.422032	0.166825	0.129169	0.228701	5	18	0.277778
LMO2	204249_s_at				0.701568	0.96277	0.0150676	0.078862	0.0251412	0.205351	0.855858	0.539219	0.0432222	0.399515	0.45435	0.00848148	0.122373	0.0621513	0.0551159	0.378803	0.0825751	0.0227801	5	18	0.277778
LMOD1	203766_s_at				0.806924	0.723693	0.00492466	0.400554	0.378336	0.323752	0.01088	0.00455065	0.00334851	0.590378	0.81522	0.0422617	0.0845419	0.650655	0.153891	0.0813524	0.77057	0.555946	5	18	0.277778
LPAR2	206723_s_at				0.18066	0.655077	0.0337069	0.0220329	0.210436	0.0843762	0.105413	0.899309	0.0489304	0.575477	0.193297	0.122138	0.201581	0.0220508	0.439061	0.0141426	0.362964	0.102616	5	18	0.277778
LPXN	216250_s_at				0.786227	0.130287	0.916122	0.593195	0.86422	0.519996	0.700373	0.712616	0.00295405	0.353977	0.224632	0.00329874	0.000268555	0.0677838	0.463245	0.0273607	0.193174	0.00965153	5	18	0.277778
LRRFIP1	211452_x_at				0.469805	0.940488	0.000631331	0.0420025	0.000350661	0.0118042	0.843788	0.91967	0.000217256	0.929805	0.178245	0.414877	0.386149	0.904786	0.967721	0.620556	0.914194	0.657636	5	18	0.277778
LTN1	215596_s_at				0.246287	0.456541	0.977301	0.620621	0.927009	0.495791	0.208947	0.231268	0.00132316	0.723071	0.0563666	0.251204	0.135497	0.0278067	0.0378828	0.00459517	0.29295	0.0135083	5	18	0.277778
LYPLA1	212449_s_at				0.283541	0.682909	0.347344	0.228348	0.517844	0.0196275	0.130657	0.029688	0.00584427	0.964883	0.0737798	0.447961	0.0478753	0.264905	0.0269059	0.129783	0.141774	0.479778	5	18	0.277778
LZTFL1	218437_s_at				0.0843726	0.0489355	0.271217	0.598025	0.428265	0.497014	0.137442	0.188802	0.0031967	0.174209	0.255296	0.0456314	0.134978	0.00633047	0.213595	0.381905	0.107583	0.00412391	5	18	0.277778
MAGOH	210093_s_at				0.0226934	0.398421	0.744321	0.110943	0.152534	0.328848	0.134068	0.499184	0.0485527	0.0489058	0.211952	0.72547	0.382592	0.945507	0.00467846	0.00553014	0.404921	0.513604	5	18	0.277778
MAP4K3	218311_at				0.492844	0.723443	0.810362	0.823403	0.562049	0.515415	0.951675	0.590718	0.00349962	0.855858	0.229155	0.351624	0.00161994	0.0151452	0.0255666	0.0437074	0.210619	0.16637	5	18	0.277778
MAP7	202890_at				0.198616	0.350383	0.182244	0.0207377	0.971621	0.758682	0.506559	0.87935	0.00257096	0.975886	0.0502461	0.465956	0.000328053	0.419389	0.00979979	0.292603	0.402877	0.0238332	5	18	0.277778
MAPK1IP1L	212644_s_at				0.0947894	0.566481	0.933	0.940577	0.316325	0.470144	0.0378868	0.124671	0.0247743	0.0371564	0.915913	0.239749	0.0337272	0.165737	0.452441	0.000649679	0.763978	0.0753671	5	18	0.277778
MAPRE2	213489_at				0.447992	0.322277	0.342717	0.469666	0.568492	0.750017	0.828103	0.588841	0.034575	0.986029	0.47494	0.0471833	0.596396	0.0255155	0.82593	6.98e-05	0.730539	0.0161072	5	18	0.277778
MARCKS	201670_s_at				0.0392121	0.611909	0.0417226	0.23751	0.0562052	0.263685	0.43654	0.443624	0.70996	0.819965	0.650753	0.0506975	0.0233498	0.75191	0.187688	0.000652918	0.0492652	0.347083	5	18	0.277778
MARK4	221560_at				0.912245	0.588499	0.0407909	0.494265	0.0281017	0.230037	0.00133073	0.00244819	0.00595057	0.508314	0.805315	0.815674	0.843108	0.372466	0.163802	0.651543	0.110775	0.0888014	5	18	0.277778
ME1	204058_at				0.612089	0.278786	0.86553	0.910724	0.0025896	0.0191639	0.148879	0.320353	0.0193918	0.843474	0.137437	0.176542	0.220842	0.218302	0.00418119	0.172599	0.481002	0.0438071	5	18	0.277778
MED21	209362_at				0.988999	0.235491	0.317717	0.0277854	0.421254	0.145243	0.268285	0.198348	0.00384788	0.199751	0.293283	0.0745924	0.114869	0.0351524	0.0285375	0.0592601	0.144775	0.0216867	5	18	0.277778
MELK	204825_at				0.812635	0.302139	0.982662	0.561016	0.666991	0.355915	0.00317102	0.0980672	0.225154	0.0278194	0.0479754	0.0380053	8.72e-05	0.71626	0.616476	0.578143	0.820392	0.0644044	5	18	0.277778
MGAT5	212098_at				0.666858	0.891535	0.0495413	0.110387	0.162474	0.371085	0.462031	0.923962	0.699389	0.836565	0.416423	0.000491075	0.011407	0.971669	0.00719676	0.000136444	0.60502	0.476906	5	18	0.277778
MGST3	201403_s_at				0.0311238	0.0410222	0.206872	0.82047	0.0733603	0.305347	0.526138	0.864003	0.0710776	0.78221	0.947001	0.890593	0.356118	0.0306816	0.0461467	0.0387588	0.666919	0.491548	5	18	0.277778
MKL2	218259_at				0.428779	0.616484	0.739773	0.649739	0.677463	0.412539	0.320937	0.0798794	0.009195	0.940706	0.387735	0.17647	0.0118924	0.122663	0.00507289	0.00685354	0.285611	0.0357658	5	18	0.277778
MMP25	207890_s_at				0.67369	0.304046	0.549162	0.18448	0.297264	0.654226	0.266678	0.847719	0.0315901	0.0213842	0.609711	0.774387	0.637863	0.160334	0.0293666	0.0136714	0.358941	0.0492586	5	18	0.277778
MNDA	204959_at				0.494498	0.837285	0.300505	0.0339959	0.491681	0.136559	0.000127351	0.580291	0.144538	0.157164	0.282514	0.0271581	0.0136662	0.25404	0.0268164	0.350356	0.670822	0.855942	5	18	0.277778
MOK	205130_at				0.284791	0.278435	0.0385925	0.370136	0.228055	0.546467	0.0347308	0.0112186	0.18432	0.161183	0.519166	0.994638	0.963997	0.0498166	0.24435	0.65927	0.42677	0.0226236	5	18	0.277778
MORC2	216863_s_at				0.0439658	0.115925	0.178114	0.0232258	0.841184	0.148717	0.224823	0.642742	0.0470467	0.721157	0.34372	0.137638	0.622628	0.111992	0.0476582	0.521028	0.997276	0.0236018	5	18	0.277778
MPP5	219321_at				0.183389	0.277488	0.908233	0.667557	0.646095	0.563863	0.870217	0.851007	0.0145183	0.596362	0.388741	0.66136	0.0207327	0.98489	0.018652	0.0143569	0.0402174	0.586195	5	18	0.277778
MRPL3	208787_at				0.92417	0.196337	0.770627	0.911134	0.795714	0.481949	0.110872	0.280901	0.000249246	0.84354	0.208111	0.352008	0.0433225	0.915212	0.00668026	0.942196	0.0475214	0.0193564	5	18	0.277778
MRPL39	218558_s_at				0.173196	0.0598792	0.79509	0.68361	0.8947	0.632346	0.0653431	0.0456036	0.00370761	0.717071	0.00346569	0.00422607	0.613676	0.307602	0.0645168	0.0179381	0.279761	0.134501	5	18	0.277778
MRPS35	217942_at				0.728485	0.289552	0.423844	0.107917	0.66257	0.885468	0.0483497	0.049441	0.00832117	0.41361	0.171245	0.898379	0.910913	0.0188086	0.431828	0.310344	0.227666	0.0119094	5	18	0.277778
MSR1	214770_at				0.352861	0.302003	0.000631825	0.411402	0.0426427	0.506311	0.284207	0.712749	0.0737406	0.901266	0.207034	0.013878	0.00022588	0.506449	0.170649	0.0184194	0.651156	0.103961	5	18	0.277778
MSTO1	218296_x_at				0.404419	0.61038	0.691811	0.443163	0.707262	0.353843	0.0305763	0.344184	0.00467121	0.597161	0.23268	0.00482741	0.00880455	0.424566	0.0445244	0.369039	0.244029	0.0533003	5	18	0.277778
MTHFD1	202309_at				0.497015	0.514138	0.00054963	0.122477	0.075645	0.563224	0.0142671	0.0290034	0.218111	0.639487	0.0847463	0.0114375	0.116086	0.925907	0.549448	0.651076	0.30516	0.000291187	5	18	0.277778
MTRR	203200_s_at				0.903053	0.146697	0.012792	0.295555	0.833857	0.991675	0.480738	0.210077	0.00664461	0.51397	0.777203	0.250064	0.572789	0.0998149	0.0276066	0.81312	0.0192351	0.00057819	5	18	0.277778
MUC4	217110_s_at				0.0634165	0.580753	0.158617	0.174055	0.0376393	0.491859	0.854582	0.731991	0.00508552	0.0489093	0.301002	0.00762039	0.0166521	0.421391	0.408246	0.891479	0.0952654	0.729436	5	18	0.277778
MYL4	210395_x_at				0.602487	0.681703	0.314854	0.226712	0.0444822	0.063178	0.0142984	0.0230157	0.288129	0.238609	0.546546	0.839028	0.826015	0.0345675	0.74867	0.822792	0.0388191	0.669166	5	18	0.277778
MYNN	218926_at				0.852256	0.709913	0.408725	0.0411975	0.34221	0.11036	0.00152375	0.000397317	0.305931	0.0367513	0.146023	0.0598569	0.76911	0.263813	0.222634	0.00100822	0.175436	0.101009	5	18	0.277778
MYO10	201976_s_at				0.566152	0.80236	0.109922	0.0324286	0.670728	0.45059	0.00586762	0.000896586	0.826186	0.200386	0.57558	0.245412	0.583238	0.719013	0.0241334	0.038217	0.215497	0.143354	5	18	0.277778
N4BP2L1	214906_x_at				0.723441	0.347206	0.00910634	0.362527	0.0392063	0.820295	0.759159	0.770636	0.0205083	0.796816	0.401335	0.399942	0.0459867	0.464232	0.176612	0.0162183	0.806919	0.336171	5	18	0.277778
NAA35	220925_at				0.0233109	0.101467	0.752643	0.771626	0.166013	0.777953	0.222745	0.475053	0.0401585	0.572146	0.6317	0.838381	0.139611	0.0495183	0.340642	0.00829467	0.250419	0.00943392	5	18	0.277778
NAGA	202943_s_at				0.0241507	0.00915165	0.718541	0.455957	0.948368	0.471319	0.0389469	0.0234641	0.601606	0.919786	0.170074	0.00495767	0.191923	0.110697	0.653393	0.771487	0.904969	0.128285	5	18	0.277778
NAP1L3	204749_at				0.382685	0.444352	0.0843052	0.694892	0.0345482	0.999524	0.946458	0.489627	0.0146743	0.233546	0.201434	0.121255	0.00611021	0.0274635	0.0781145	0.194339	0.217074	0.0377844	5	18	0.277778
NAPA	206491_s_at				0.036627	0.0119991	0.825728	0.919767	0.170669	0.499023	0.271511	0.150107	0.0204023	0.79879	0.314211	0.552047	0.117999	0.0267547	0.878603	0.0386935	0.602587	0.053944	5	18	0.277778
NAT9	204382_at				0.03636	0.0316671	0.354869	0.534261	0.613754	0.602788	0.0203113	0.0471182	0.24481	0.988723	0.200992	0.603031	0.464348	0.0980077	0.0432756	0.443128	0.267021	0.446446	5	18	0.277778
NBEA	221207_s_at				0.0150789	0.764723	0.0203743	0.403858	0.13449	0.657011	0.0484007	0.100203	0.0253439	0.189782	0.417918	0.123783	0.769076	0.787837	0.0617724	0.806958	0.130238	0.0335049	5	18	0.277778
NCF2	209949_at				0.119735	0.0967316	0.0652157	0.143369	0.238839	0.211669	0.0036671	7.63e-05	0.993949	0.345744	0.183385	0.00224564	0.000732764	0.615263	0.0283555	0.765126	0.562294	0.316371	5	18	0.277778
NDUFA5	201304_at				0.00544138	0.457288	0.224694	0.887653	0.491551	0.118928	0.0263471	0.0629586	0.00723728	0.0996908	0.430631	0.364122	0.444955	0.255244	0.00234034	0.0120604	0.103861	0.168215	5	18	0.277778
NEDD9	202149_at				0.122346	0.462303	0.213885	0.00343884	0.342217	0.00465641	0.00101582	0.000689959	0.064975	0.495929	0.695543	0.534585	0.0761673	0.481269	0.00173111	0.0647751	0.364629	0.752506	5	18	0.277778
NIPA2	212129_at				0.740474	0.257667	0.633659	0.760597	0.882038	0.406131	0.768415	0.467666	0.0100376	0.0605804	0.784761	0.00374086	0.0613754	0.422848	0.0161805	0.00821752	0.0651664	0.038719	5	18	0.277778
NIPBL	213918_s_at				0.660603	0.454799	0.773728	0.661194	0.3698	0.317325	0.495562	0.270757	0.322666	0.580461	0.911489	0.0394188	0.0273086	0.717381	0.000386805	0.0268828	0.0135475	0.627455	5	18	0.277778
NMRK2	221051_s_at				0.22432	0.0225072	0.0204982	0.0283989	0.0020825	0.00411078	0.859535	0.765176	0.0552684	0.568685	0.711172	0.252826	0.153006	0.396486	0.128854	0.524712	0.820849	0.134447	5	18	0.277778
NOL7	213838_at				0.318021	0.402023	0.402684	0.261296	0.901084	0.89365	0.0803893	0.183435	0.00101975	0.139982	0.177091	0.0199808	0.0955479	0.517812	0.073983	0.0449089	0.021803	0.0186509	5	18	0.277778
NOMO2	221852_at				0.0458414	0.749335	0.328378	0.660208	0.0178365	0.284561	0.972656	0.874403	0.0126136	0.567928	0.266188	0.39878	0.160368	0.897589	0.669293	0.0100902	0.956341	0.0304317	5	18	0.277778
NOMO3	221852_at				0.0458414	0.749335	0.328378	0.660208	0.0178365	0.284561	0.972656	0.874403	0.0126136	0.567928	0.266188	0.39878	0.160368	0.897589	0.669293	0.0100902	0.956341	0.0304317	5	18	0.277778
NPY1R	205440_s_at				0.599024	0.218389	0.0379212	0.961099	0.136042	0.498298	0.75982	0.311218	0.415922	0.739119	0.775416	0.0423176	0.00311509	0.0752632	0.00502389	0.0225455	0.603844	0.0970347	5	18	0.277778
NR3C2	205259_at				0.423032	0.48678	0.0091524	0.0483185	0.672596	0.463609	0.0349929	0.0419412	0.105299	0.221301	0.730828	0.282497	0.092425	0.0404703	0.232823	0.598786	0.15464	0.102946	5	18	0.277778
NRAS	202647_s_at				0.920585	0.532921	0.127149	0.632293	0.361239	0.656307	0.00187869	0.00822061	0.069199	0.842863	0.122385	0.0177365	0.00589682	0.0239117	0.10912	0.126272	0.0548653	0.142349	5	18	0.277778
ODZ4	213273_at				0.64361	0.387557	0.0483952	0.546931	0.020466	0.763412	0.133103	0.140295	0.596174	0.180939	0.0818563	0.0188112	0.00452437	0.0228425	0.960187	0.646947	0.846072	0.246578	5	18	0.277778
OGDHL	219277_s_at				0.519209	0.0829034	0.081693	0.0371656	0.456959	0.48316	0.0815359	0.021178	0.807169	0.345547	0.619956	0.503139	0.0291332	0.276529	0.0305159	0.0436207	0.859936	0.991469	5	18	0.277778
OLA1	219293_s_at				0.595463	0.810422	0.0348175	0.102466	0.0411928	0.141861	0.108409	0.138165	0.267582	0.52241	0.0410914	0.663593	0.0649029	0.208824	0.081078	0.0183963	0.161953	0.0103431	5	18	0.277778
ORAI2	218811_at				0.920467	0.767792	0.75644	0.568661	0.606366	0.867382	0.0071911	0.0316999	0.146766	0.457874	0.0258957	0.35841	0.303649	0.0252451	0.734201	0.0494664	0.15548	0.328801	5	18	0.277778
ORC3	210028_s_at				0.0439445	0.987792	0.812674	0.128548	0.479144	0.925971	0.330481	0.162245	0.00332976	0.636142	0.312596	0.923028	0.223845	0.02963	0.153507	0.0359455	0.724094	0.00016116	5	18	0.277778
ORC5	204957_at				0.967519	0.714791	0.056722	0.00408227	0.944283	0.227802	0.175879	0.0264287	0.00680679	0.30836	0.257189	0.859524	0.158716	0.607369	0.207318	0.00628489	0.220762	0.00387745	5	18	0.277778
OSBPL11	218304_s_at				0.728718	0.269863	0.370889	0.884531	0.967901	0.688649	0.676758	0.288221	0.00960944	0.623559	0.052084	0.0406882	0.228507	0.0385484	0.0178677	0.0362976	0.0864668	0.384233	5	18	0.277778
OSBPL3	209627_s_at				0.469417	0.712252	0.157437	0.210677	0.437404	0.472307	0.0436013	0.692106	0.0390976	0.53991	0.148408	0.00326975	0.00563686	0.188136	0.449576	0.0487349	0.817373	0.0666547	5	18	0.277778
P2RX2	221372_s_at				0.992671	0.888215	0.370288	0.921874	0.0370178	0.148822	0.82041	0.259733	0.0490203	0.882547	0.0238152	0.0489046	0.254074	0.0147095	0.234204	0.227979	0.850661	0.117219	5	18	0.277778
P4HB	200656_s_at				0.846711	0.135878	0.397578	0.690229	0.139658	0.318437	0.0715441	0.0308006	0.00277752	0.50093	0.623544	0.249441	0.00242801	0.165132	0.175445	0.0148005	0.457658	0.0418128	5	18	0.277778
PAK2	208877_at				0.374017	0.763963	0.449808	0.810441	0.0344063	0.220289	0.179267	0.541032	0.044219	0.603338	0.39248	0.18947	0.0105299	0.708894	0.0118722	0.0154468	0.0870475	0.95777	5	18	0.277778
PALM2-AKAP2	202759_s_at				0.871862	0.2181	0.567936	0.0322451	0.735998	0.0468553	0.883739	0.815508	0.0141334	0.647851	0.0384246	0.19442	0.0517223	0.428292	0.0714713	0.00600309	0.823484	0.272645	5	18	0.277778
PANK3	221751_at				0.338212	0.71166	0.159694	0.425648	0.657195	0.675159	0.393573	0.202281	0.00270307	0.595772	0.0481189	0.450484	0.00591722	0.116872	0.0044465	0.828803	0.0882954	0.0124959	5	18	0.277778
PAQR4	212858_at				0.0280743	0.0713711	0.0276876	0.404303	0.0347292	0.423669	0.143053	0.571509	0.0582248	0.68233	0.290756	0.99022	0.701836	0.984581	0.12065	0.0382524	0.363878	0.00606565	5	18	0.277778
PATZ1	209494_s_at				0.806317	0.197206	0.00544988	0.0158152	0.00486942	0.00710989	0.291567	0.331891	0.0264253	0.194056	0.0648069	0.55027	0.550638	0.550477	0.374997	0.246973	0.372186	0.644867	5	18	0.277778
PAX2	206229_x_at				0.887107	0.328722	0.528531	0.979658	0.772167	0.391091	0.0293696	0.00739623	0.00118077	0.0125417	0.656987	0.567178	0.774396	0.206146	0.539693	0.460526	0.82654	0.0109343	5	18	0.277778
PBX2	202876_s_at				0.00118427	0.217059	0.453857	0.0387513	0.696289	0.00424519	0.45178	0.940402	0.131143	0.789123	0.190837	0.469265	0.0474903	0.0850276	0.599189	4.95e-05	0.0513579	0.31573	5	18	0.277778
PBX2P1	202876_s_at				0.00118427	0.217059	0.453857	0.0387513	0.696289	0.00424519	0.45178	0.940402	0.131143	0.789123	0.190837	0.469265	0.0474903	0.0850276	0.599189	4.95e-05	0.0513579	0.31573	5	18	0.277778
PCID2	219940_s_at				0.554722	0.368917	0.0121184	0.00405392	0.18663	0.041086	0.370139	0.653185	0.0147051	0.520133	0.509242	0.63852	0.559	0.259011	0.542901	0.375863	0.962817	0.0192298	5	18	0.277778
PCNA	201202_at				0.762882	0.232966	0.4281	0.0231646	0.460648	0.271699	0.133999	0.470604	0.0041856	0.0141872	0.103434	0.00796536	0.105524	0.542953	0.00526531	0.30777	0.725685	0.10715	5	18	0.277778
PCOLCE	202465_at				0.0168685	0.626031	0.0369233	0.208404	0.155639	0.917215	0.35976	0.436801	0.0341295	0.46893	0.119743	0.112454	0.150298	0.0194599	0.503751	0.0305701	0.24342	0.992487	5	18	0.277778
PCTP	218676_s_at				0.760922	0.748186	0.709335	0.685835	0.446399	0.984725	0.0215088	0.00734876	0.0232865	0.687239	0.157108	0.00487248	0.0597875	0.631634	0.873753	0.0108341	0.581326	0.64423	5	18	0.277778
PDAP1	202290_at				0.00162786	0.0170934	0.742892	0.879721	0.505786	0.728647	0.351126	0.0253822	0.932071	0.445864	0.738081	0.525521	0.965882	0.0275987	0.363431	4.46e-06	0.655489	0.403235	5	18	0.277778
PDHX	203067_at				0.0230967	0.0711441	0.396003	0.521448	0.181041	0.248978	0.0763997	0.040127	0.00240982	0.745667	0.259149	0.117907	0.291368	0.422614	0.0212984	0.808901	0.0789248	0.0156382	5	18	0.277778
PDIA4	211048_s_at				0.0131874	0.0211049	0.0274121	0.0877267	0.0666014	0.320813	0.574847	0.561405	0.10324	0.781089	0.797559	0.036999	0.118449	0.0764923	0.206718	0.0074282	0.188188	0.115804	5	18	0.277778
PDLIM7	214121_x_at				0.485121	0.741898	0.0449926	0.115119	0.193376	0.446997	0.00572487	0.00741402	0.131562	0.724079	0.881977	0.131433	0.225054	0.0741714	0.248841	0.010991	0.909361	0.0012175	5	18	0.277778
PEG3	209242_at				0.108922	0.151148	0.0378352	0.155679	0.0253678	0.0842426	0.408751	0.0387831	0.00948665	0.884776	0.873359	0.449836	0.434521	0.163788	0.36337	0.0139649	0.343191	0.431873	5	18	0.277778
PEX1	215023_s_at				0.0432914	0.0034245	0.20421	0.104264	0.920296	0.833014	0.000274181	0.0064161	0.939925	0.187695	0.27042	0.542691	0.139684	0.0390333	0.945247	0.0792487	0.0944787	0.228808	5	18	0.277778
PEX3	203972_s_at				0.889855	0.1038	0.0079502	0.00469682	0.157618	0.240195	0.460359	0.424884	0.000487985	0.919967	0.126376	0.176694	0.300607	0.128069	0.710221	0.000447297	0.178968	0.0144037	5	18	0.277778
PGLYRP4	220944_at				0.363314	0.822067	0.0427827	0.811648	0.0106621	0.757735	0.845515	0.874248	0.0149984	0.142327	0.355159	0.818823	0.374169	0.442833	0.753551	0.0137644	0.558382	0.0159076	5	18	0.277778
PGRMC2	201701_s_at				0.247749	0.645001	0.659044	0.179505	0.967867	0.0775545	0.0703195	0.0596972	0.000223863	0.498481	0.567314	0.431953	0.0295506	0.915005	0.0005098	0.00274586	0.275697	0.0241494	5	18	0.277778
PHC3	220328_at				0.0116202	0.0762789	0.890856	0.480006	0.0573539	0.712572	0.0221194	0.0503738	0.0450879	0.551676	0.42004	0.381895	0.0358347	0.507289	0.0868215	0.00924664	0.797589	0.217326	5	18	0.277778
PHTF2	209780_at				0.685172	0.806835	0.112907	0.938049	0.0316714	0.448988	0.88577	0.976244	0.0136097	0.588609	0.262056	0.16733	0.0150307	0.0930536	0.048211	0.0491283	0.471867	0.541828	5	18	0.277778
PIBF1	213239_at				0.189661	0.305868	0.0351561	0.0322514	0.710575	0.283677	0.153662	0.396146	0.0143726	0.590951	0.773818	0.48415	0.261619	0.141547	0.129126	0.633712	0.0451702	0.0427026	5	18	0.277778
PID1	219093_at				0.335653	0.831435	0.0393771	0.433667	0.107741	0.44437	0.579074	0.538578	0.0488783	0.513657	0.50329	0.045595	0.0184971	0.911687	0.0442316	0.573689	0.344485	0.136215	5	18	0.277778
PIGB	205452_at				0.0877688	0.143567	0.242311	0.17085	0.55391	0.302658	0.574219	0.308809	0.0403805	0.74076	0.0593411	0.0232848	0.061561	0.0317676	0.0480355	0.0234856	0.450895	0.746933	5	18	0.277778
PIGF	205078_at				0.770633	0.792739	0.016439	0.0437749	0.408369	0.205899	0.11667	0.184761	0.0387261	0.159174	0.0968436	0.920806	0.0571612	0.0292793	0.0892146	0.189664	0.875926	0.0240105	5	18	0.277778
PKP2	207717_s_at				0.00779333	0.16692	0.0386437	0.0363163	0.0710188	0.0934254	0.711698	0.760452	0.0146945	0.330592	0.952391	0.0639188	0.488977	0.172598	0.00426024	0.346321	0.328499	0.932087	5	18	0.277778
PLAA	209532_at				0.257142	0.886737	0.744928	0.109428	0.470875	0.334977	0.00560635	0.0230603	0.288415	0.431571	0.165472	0.499375	6.81e-05	0.959895	0.151998	0.031367	0.16474	0.0137718	5	18	0.277778
PLCG1	216551_x_at				0.208306	0.097856	0.113925	0.28862	0.135529	0.596077	0.0247927	0.0170819	0.0200282	0.329842	0.611359	0.678358	0.562924	0.188471	0.689408	0.0118102	0.0403221	0.106542	5	18	0.277778
PLD1	205203_at				0.25812	0.471793	0.036467	0.106286	0.858525	0.0585628	0.0145048	0.0392408	0.00407861	0.121884	0.850439	0.809737	0.0397233	0.646395	0.529761	0.0575078	0.724493	0.627112	5	18	0.277778
PLEKHA1	219024_at				0.0266819	0.0872559	0.0605629	0.460717	0.0368666	0.345589	0.834164	0.641826	0.0531945	0.342877	0.0784605	0.00481791	6.73e-06	0.796086	0.178272	0.00452984	0.862249	0.173437	5	18	0.277778
PLLP	204519_s_at				0.595662	0.711206	0.0066927	0.0451762	0.365985	0.265014	0.312812	0.82532	0.610186	0.0136868	0.377461	0.589412	0.019227	0.832876	0.0408265	0.646908	0.103779	0.604251	5	18	0.277778
PMS2P10	215667_x_at				0.83656	0.43453	0.0181651	0.237026	0.0118298	0.127117	0.102256	0.0138236	0.133165	0.745136	0.442942	0.971022	0.213946	0.012012	0.802209	0.0551365	0.965089	0.00308421	5	18	0.277778
PMS2P11	210707_x_at				0.682574	0.604597	0.0123017	0.157381	0.00534173	0.0892544	0.718499	0.584034	0.128846	0.54843	0.373432	0.703635	0.38257	0.03105	0.475147	0.000224112	0.488975	0.0397088	5	18	0.277778
PMS2P2	210707_x_at				0.682574	0.604597	0.0123017	0.157381	0.00534173	0.0892544	0.718499	0.584034	0.128846	0.54843	0.373432	0.703635	0.38257	0.03105	0.475147	0.000224112	0.488975	0.0397088	5	18	0.277778
PMS2P3	210707_x_at				0.682574	0.604597	0.0123017	0.157381	0.00534173	0.0892544	0.718499	0.584034	0.128846	0.54843	0.373432	0.703635	0.38257	0.03105	0.475147	0.000224112	0.488975	0.0397088	5	18	0.277778
PMS2P5	215667_x_at				0.83656	0.43453	0.0181651	0.237026	0.0118298	0.127117	0.102256	0.0138236	0.133165	0.745136	0.442942	0.971022	0.213946	0.012012	0.802209	0.0551365	0.965089	0.00308421	5	18	0.277778
PMS2P9	210707_x_at				0.682574	0.604597	0.0123017	0.157381	0.00534173	0.0892544	0.718499	0.584034	0.128846	0.54843	0.373432	0.703635	0.38257	0.03105	0.475147	0.000224112	0.488975	0.0397088	5	18	0.277778
POLDIP3	215357_s_at				0.0409842	0.592089	0.00706995	0.00733679	0.383951	0.98005	0.394092	0.142576	0.0209846	0.449094	0.0426707	0.409599	0.738503	0.143336	0.635512	0.11376	0.745965	0.154029	5	18	0.277778
POLR2C	208996_s_at				0.0129177	0.0497178	0.254019	0.768565	0.138594	0.642404	0.208666	0.179234	0.00601623	0.493425	0.753143	0.599881	0.307028	0.0380043	0.507755	0.215892	0.719378	0.0380412	5	18	0.277778
POP4	202868_s_at				0.907445	0.853979	0.237875	0.0338027	0.470949	0.0158502	0.315394	0.711832	0.0128765	0.0410117	0.813007	0.314062	0.374874	0.225943	0.0334367	0.281526	0.252339	0.268408	5	18	0.277778
POU5F1	210265_x_at				0.34662	0.557301	0.644922	0.276195	0.710226	0.853234	0.00974888	0.00137384	0.00587191	0.830781	0.389201	0.0423209	0.928236	0.0276054	0.221499	0.60911	0.41171	0.898569	5	18	0.277778
POU5F1P3	210265_x_at				0.34662	0.557301	0.644922	0.276195	0.710226	0.853234	0.00974888	0.00137384	0.00587191	0.830781	0.389201	0.0423209	0.928236	0.0276054	0.221499	0.60911	0.41171	0.898569	5	18	0.277778
PPAP2A	210946_at				0.911955	0.415847	0.0202923	0.0417679	0.013858	0.0734701	0.630008	0.492006	0.0233617	0.225184	0.537725	0.00329913	0.0842085	0.327607	0.302386	0.0627487	0.164924	0.879051	5	18	0.277778
PPIA	211978_x_at				0.332524	0.396525	0.851181	0.66896	0.766476	0.84488	0.00413975	0.00719958	0.0134757	0.262434	0.370717	0.723761	0.979644	0.0119796	0.314092	0.603732	0.780306	0.0496649	5	18	0.277778
PPIAP22	211978_x_at				0.332524	0.396525	0.851181	0.66896	0.766476	0.84488	0.00413975	0.00719958	0.0134757	0.262434	0.370717	0.723761	0.979644	0.0119796	0.314092	0.603732	0.780306	0.0496649	5	18	0.277778
PPIAP29	211978_x_at				0.332524	0.396525	0.851181	0.66896	0.766476	0.84488	0.00413975	0.00719958	0.0134757	0.262434	0.370717	0.723761	0.979644	0.0119796	0.314092	0.603732	0.780306	0.0496649	5	18	0.277778
PPM1B	213225_at				0.777141	0.264665	0.710176	0.843277	0.0462541	0.0447204	0.16049	0.375978	0.0121412	0.929736	0.177378	0.163883	0.0132303	0.428154	0.00899982	0.147597	0.353412	0.489157	5	18	0.277778
PPP1CB	201409_s_at				0.260865	0.168377	0.446679	0.362874	0.0212709	0.0387501	0.938354	0.415842	0.0646223	0.449347	0.698476	0.19226	0.0174472	0.036822	0.012461	0.298634	0.121439	0.157573	5	18	0.277778
PPP1R2	202165_at				0.118361	0.0413033	0.0434941	0.453298	0.168754	0.896111	0.652279	0.904563	0.0174698	0.546109	0.715462	0.0531146	0.18643	0.0811235	0.0171635	0.000332716	0.134022	0.219844	5	18	0.277778
PPP1R2P3	202165_at				0.118361	0.0413033	0.0434941	0.453298	0.168754	0.896111	0.652279	0.904563	0.0174698	0.546109	0.715462	0.0531146	0.18643	0.0811235	0.0171635	0.000332716	0.134022	0.219844	5	18	0.277778
PPP4R4	220673_s_at				0.214319	0.578969	0.583932	0.0464827	0.476662	0.426537	0.0188133	0.0169118	0.00220514	0.397983	0.117734	0.884427	0.262172	0.379482	0.889373	0.801076	0.732747	0.0126317	5	18	0.277778
PREPL	212216_at				0.913815	0.429081	0.0202276	0.331524	0.927577	0.047005	0.381355	0.533371	0.507622	0.732279	0.533261	0.173613	0.00818935	0.0647848	0.314141	6.14e-05	0.903346	0.0291735	5	18	0.277778
PROZ	208034_s_at				0.215181	0.908376	0.0192582	0.10137	0.270488	0.150017	0.00390183	0.101351	0.00635467	0.0223252	0.703537	0.562318	0.521985	0.816243	0.123347	0.00510247	0.354495	0.123013	5	18	0.277778
PRPF4B	202126_at				0.529432	0.958463	0.915573	0.56406	0.786677	0.643492	0.776377	0.301696	0.00667012	0.986201	0.226102	0.835866	0.0135683	0.240334	0.0214901	0.270258	0.0313046	0.000271976	5	18	0.277778
PSAP	200871_s_at				0.42215	0.623104	0.379066	0.787279	0.00995473	0.040261	0.315542	0.0482074	0.705694	0.216705	0.62821	0.0461308	0.0620501	0.443861	0.412745	0.703301	0.786826	0.0123696	5	18	0.277778
PSMD13	201232_s_at				0.355338	0.786131	0.0066768	0.796399	0.0127477	0.989489	0.00257699	0.019862	0.254807	0.281482	0.647196	0.535836	0.0792417	0.727805	0.823023	0.136722	0.532425	0.043958	5	18	0.277778
PSMF1	201053_s_at				0.985052	0.730749	0.207161	0.653102	0.850221	0.917947	0.0179949	0.0250629	0.0211041	0.310395	0.1617	0.534555	0.714476	0.0802182	0.04826	0.79799	0.166069	0.0120125	5	18	0.277778
PTEN	217492_s_at				0.775386	0.440439	0.181444	0.662242	0.780056	0.529238	0.132842	0.122205	0.00201045	0.509799	0.720448	0.0203428	0.306423	0.151392	0.0222321	0.0329216	0.00307223	0.145187	5	18	0.277778
PTENP1	217492_s_at				0.775386	0.440439	0.181444	0.662242	0.780056	0.529238	0.132842	0.122205	0.00201045	0.509799	0.720448	0.0203428	0.306423	0.151392	0.0222321	0.0329216	0.00307223	0.145187	5	18	0.277778
PTPN11	212610_at				0.214677	0.109688	0.473646	0.328246	0.243724	0.210994	0.411717	0.391153	0.0067505	0.555902	0.0931763	0.291665	0.000971443	0.0305759	0.00139272	0.577863	0.0589905	0.025196	5	18	0.277778
PUM2	216221_s_at				0.591593	0.359346	0.115962	0.463616	0.986684	0.707518	0.134025	0.124257	0.0179953	0.0898127	0.045883	0.408144	0.116842	0.0313119	0.230411	6.54e-06	0.66437	0.00214418	5	18	0.277778
RAB15	59697_at				0.758791	0.981914	0.164276	0.0474437	0.303064	0.112931	0.0194621	0.00597375	0.126353	0.597012	0.124078	0.0291905	0.00824501	0.226761	0.476209	0.201235	0.882011	0.982294	5	18	0.277778
RAB27A	210951_x_at				0.120081	0.159513	0.0611308	0.0451591	0.0021554	0.00106287	0.430798	0.936235	0.91295	0.580693	0.660648	0.0460663	0.457509	0.772175	0.0117396	0.921764	0.111384	0.326871	5	18	0.277778
RAB3GAP2	202374_s_at				0.0120737	0.0357102	0.43261	0.507583	0.645232	0.458727	0.236824	0.542419	0.0104148	0.147686	0.25247	0.539502	0.04699	0.216129	0.986606	5.3e-06	0.240454	0.919854	5	18	0.277778
RABAC1	203136_at				0.542301	0.494322	0.00330825	0.868498	0.0203877	0.986352	0.264644	0.0317418	0.0111778	0.79158	0.750706	0.695397	0.0861671	0.223281	0.366358	0.296794	0.57077	0.00598375	5	18	0.277778
RABGGTB	213704_at				0.432073	0.826138	0.903821	0.603221	0.10188	0.0770191	0.0235802	0.029052	0.00212305	0.213527	0.408236	0.276625	0.66532	0.87632	0.00882626	0.672103	0.146015	0.00280051	5	18	0.277778
RAI14	202052_s_at				0.397612	0.0880491	0.00222025	0.277295	0.000957796	0.0636944	0.241026	0.15413	0.105935	0.869496	0.744281	0.0413973	0.0962596	0.0103157	0.884264	0.00620993	0.275769	0.309011	5	18	0.277778
RANBP2	201713_s_at				0.847792	0.993443	0.458025	0.0348146	0.604051	0.951589	0.584252	0.350886	0.00361773	0.574254	0.273504	0.916421	0.684923	0.806528	0.00559114	0.00162037	0.399291	0.0420466	5	18	0.277778
RARG	204188_s_at				0.130018	0.0190423	0.00513392	0.162792	0.0642468	0.798893	0.0340277	0.370221	0.00774963	0.406585	0.52686	0.389936	0.128194	0.764801	0.472766	0.527981	0.257914	0.0469403	5	18	0.277778
RASAL2	219026_s_at				0.97224	0.957573	0.388585	0.509958	0.018564	0.0476035	0.0303508	0.349146	0.233931	0.897978	0.812992	0.103304	0.160977	0.602674	0.96752	0.0271134	0.0353726	0.863824	5	18	0.277778
RASSF1	204346_s_at				0.13403	0.105378	0.0906842	0.19482	0.331061	0.403427	0.023234	0.00742684	0.0265491	0.886788	0.271778	0.466917	0.0159179	0.105813	0.536691	0.00396086	0.872827	0.586484	5	18	0.277778
RASSF4	49306_at				0.00207735	0.057028	0.0713796	0.175364	0.0406897	0.0688124	0.961133	0.33211	0.00776929	0.660854	0.125942	0.101066	0.00872703	0.287885	0.760434	0.245195	0.617499	0.0216031	5	18	0.277778
RBM7	218379_at				0.388513	0.433735	0.367872	0.140514	0.74359	0.167994	0.0203128	0.0388064	0.00104068	0.357478	0.649794	0.764631	0.285312	0.970673	0.0260884	0.867987	0.388864	0.0402078	5	18	0.277778
RBPJ	211974_x_at				0.00374325	0.0100867	0.709742	0.346171	0.702838	0.375849	0.751048	0.25553	0.979392	0.787058	0.91716	0.00421386	0.184727	0.032837	0.264929	8.34e-06	0.242034	0.12632	5	18	0.277778
RCN2	201486_at				0.623612	0.605108	0.335372	0.448808	0.162783	0.390085	0.0455947	0.0506265	0.00441566	0.377432	0.326127	0.0394028	0.0528753	0.114351	0.00350194	0.0917267	0.1354	0.0156868	5	18	0.277778
REEP5	208873_s_at				0.776034	0.308815	0.0532853	0.292753	0.0456802	0.259347	0.392738	0.388937	0.00904052	0.72361	0.0727266	0.0702393	0.0113884	0.00585315	0.105557	0.535872	0.244107	0.0172912	5	18	0.277778
REV3L	208070_s_at				0.883831	0.459077	0.0167602	0.353463	0.827735	0.448743	0.241884	0.498419	0.00888936	0.383159	0.297903	0.64045	0.0105897	0.164838	0.00239416	0.287749	0.244761	0.00566718	5	18	0.277778
RGS19	204336_s_at				0.344428	0.398248	0.362175	0.000856786	0.839788	0.0509287	0.921083	0.820641	0.0104044	0.0508429	0.245799	0.0174947	0.244485	0.0695639	0.406864	0.0343782	0.345658	0.0129222	5	18	0.277778
RHOQ	212122_at				0.759413	0.316725	0.412181	0.310558	0.130454	0.120866	0.0618664	0.0403437	0.0346802	0.358058	0.426112	0.614138	0.00445046	0.120567	0.0270807	0.0745983	0.107643	0.0105158	5	18	0.277778
RIN3	219456_s_at				0.0459048	0.201791	0.342729	0.72589	0.99631	0.764865	0.549181	0.383028	0.0387177	0.540518	0.337136	0.823428	0.016988	0.0527506	0.214858	0.0428099	0.0600316	0.0145692	5	18	0.277778
RND3	212724_at				0.690044	0.720951	0.00850646	0.0289249	0.0264043	0.54117	0.250747	0.0524445	0.340469	0.746063	0.50383	0.365245	0.569956	0.950687	0.0189767	0.746347	0.249939	0.0426845	5	18	0.277778
RNF111	218761_at				0.902608	0.403141	0.323038	0.442593	0.669337	0.767258	0.309458	0.221642	0.0186131	0.877381	0.108485	0.604849	0.0611497	0.233255	0.0331104	0.00800543	0.0357514	0.020607	5	18	0.277778
RNF126	205748_s_at				0.00881158	0.354009	0.850112	0.0357307	0.901991	0.102088	0.973733	0.223465	0.992161	0.167701	0.261325	0.0106548	0.198679	0.163285	0.208341	2e-05	0.732972	0.0182917	5	18	0.277778
RNMT	202683_s_at				0.888458	0.331163	0.0620426	0.0988226	0.285117	0.562355	0.00315516	0.0124302	0.0179588	0.238342	0.720762	0.652335	0.0145482	0.0934867	0.327933	0.130067	0.489183	0.0167141	5	18	0.277778
RNPEPL1	218301_at				0.763368	0.89267	0.472012	0.697338	0.458231	0.674384	0.30705	0.511076	0.013956	0.216887	0.0373261	0.937565	0.180884	0.414709	0.0279631	0.000111857	0.392135	0.0441547	5	18	0.277778
ROR2	205578_at				0.4811	0.717186	0.707852	0.373694	0.00897667	0.763434	0.339976	0.150938	0.0050026	0.192683	0.434587	0.0498366	0.0402083	0.196244	0.657164	0.00772662	0.27541	0.140314	5	18	0.277778
RP11-1070N10.6	219839_x_at				0.674477	0.541947	0.937676	0.822049	0.764495	0.821524	0.971755	0.301912	0.024785	0.159751	0.758078	0.0162196	0.00239958	0.842935	0.00104412	0.0299088	0.525926	0.586344	5	18	0.277778
RP11-122C9.1	212042_x_at				0.159112	0.596407	0.118958	0.419986	0.00982131	0.11794	0.891524	0.44694	0.00650858	0.200814	0.849413	0.0313858	0.439498	0.978316	0.00026269	0.000184366	0.346018	0.179649	5	18	0.277778
RP11-203J24.9	202587_s_at				0.554196	0.89843	0.0229168	0.24341	0.190851	0.59776	0.00382671	0.00953933	0.864644	0.972306	0.884025	0.530618	0.0481874	0.446813	0.253431	0.00451825	0.700101	0.605797	5	18	0.277778
RP11-243J18.3	218296_x_at				0.404419	0.61038	0.691811	0.443163	0.707262	0.353843	0.0305763	0.344184	0.00467121	0.597161	0.23268	0.00482741	0.00880455	0.424566	0.0445244	0.369039	0.244029	0.0533003	5	18	0.277778
RP11-255B23.1	201224_s_at				0.136383	0.0710529	0.451392	0.652932	0.545828	0.842146	0.843941	0.664418	0.00427726	0.785492	0.0215159	0.39051	0.226058	0.145302	0.0483861	0.0497099	0.777854	0.0469708	5	18	0.277778
RP11-282K24.1	212042_x_at				0.159112	0.596407	0.118958	0.419986	0.00982131	0.11794	0.891524	0.44694	0.00650858	0.200814	0.849413	0.0313858	0.439498	0.978316	0.00026269	0.000184366	0.346018	0.179649	5	18	0.277778
RP11-293I14.2	219941_at				0.406564	0.229888	0.706859	0.504829	0.147083	0.520893	0.0167104	0.173455	0.0144837	0.0261048	0.902171	0.75975	0.0197923	0.376133	0.0864207	0.0431203	0.793078	0.100839	5	18	0.277778
RP11-313P13.3	215667_x_at				0.83656	0.43453	0.0181651	0.237026	0.0118298	0.127117	0.102256	0.0138236	0.133165	0.745136	0.442942	0.971022	0.213946	0.012012	0.802209	0.0551365	0.965089	0.00308421	5	18	0.277778
RP11-313P13.4	215667_x_at				0.83656	0.43453	0.0181651	0.237026	0.0118298	0.127117	0.102256	0.0138236	0.133165	0.745136	0.442942	0.971022	0.213946	0.012012	0.802209	0.0551365	0.965089	0.00308421	5	18	0.277778
RP11-325O24.1	221428_s_at				0.0301673	0.655762	0.749939	0.382669	0.788211	0.84852	0.0119335	0.0353676	0.00891626	0.493212	0.124536	0.369139	0.0176919	0.675749	0.969228	0.0600384	0.664443	0.115539	5	18	0.277778
RP11-332O19.5	216574_s_at				0.68406	0.283728	0.223344	0.174156	0.449209	0.213523	0.00468955	0.0882329	0.00024313	0.301062	0.157582	0.0167735	0.85768	0.361546	0.00581047	0.712095	0.22362	0.00546184	5	18	0.277778
RP11-40H20.1	217972_at				0.514291	0.589138	0.559388	0.394654	0.0769785	0.0697522	0.0147815	0.0100195	0.016021	0.860036	0.476155	0.68226	0.877305	0.201154	0.0142136	0.0506649	0.0343809	0.224388	5	18	0.277778
RP11-44F14.11	218373_at				0.79224	0.1912	0.0366887	0.0421736	0.1986	0.476529	0.979837	0.991351	0.0110591	0.454448	0.778108	0.562019	0.0413504	0.855174	0.450239	0.40137	0.0401338	0.656483	5	18	0.277778
RP11-460H18.1	211978_x_at				0.332524	0.396525	0.851181	0.66896	0.766476	0.84488	0.00413975	0.00719958	0.0134757	0.262434	0.370717	0.723761	0.979644	0.0119796	0.314092	0.603732	0.780306	0.0496649	5	18	0.277778
RP11-471J12.1	219791_s_at				0.31475	0.0341299	0.428001	0.293916	0.311917	0.668952	0.307445	0.302361	0.018631	0.0237295	0.532644	0.00403947	0.583737	0.10121	0.422798	0.0100885	0.766395	0.455349	5	18	0.277778
RP11-480I12.2	217491_x_at				0.824523	0.120613	0.245205	0.815843	0.0551364	0.11493	0.282233	0.353189	0.189471	0.02273	0.300502	0.0162571	0.0174669	0.205005	0.00343385	0.00227754	0.755834	0.102359	5	18	0.277778
RP11-48B14.2	209154_at				0.67548	0.964229	0.618465	0.845404	0.455775	0.312042	0.0204128	0.0793952	0.421771	0.228571	0.735768	0.00421057	0.0320476	0.582293	0.00566523	0.846416	0.281331	0.0168147	5	18	0.277778
RP11-526L22.1	212042_x_at				0.159112	0.596407	0.118958	0.419986	0.00982131	0.11794	0.891524	0.44694	0.00650858	0.200814	0.849413	0.0313858	0.439498	0.978316	0.00026269	0.000184366	0.346018	0.179649	5	18	0.277778
RP11-56A21.4	211684_s_at				0.769127	0.180679	0.212536	0.205907	0.99287	0.956235	0.809026	0.820279	0.0224399	0.411804	0.16119	0.282926	0.225583	0.0177793	0.0319472	0.0371283	0.313148	0.00461775	5	18	0.277778
RP11-680H20.1	208736_at				0.800186	0.213784	0.357012	0.410172	0.0269632	0.612258	0.838174	0.422726	0.0342252	0.119227	0.110897	0.0584306	0.0126687	0.0964409	0.0283351	0.00629179	0.769399	0.102452	5	18	0.277778
RP11-721G13.1	209669_s_at				0.0245283	0.193672	0.0342679	0.691251	0.0205701	0.564057	0.237309	0.590907	0.566246	0.5556	0.578754	0.575748	0.097375	0.155062	0.0139755	0.0483172	0.77207	0.845601	5	18	0.277778
RP11-769O8.3	222180_at				0.762253	0.280669	0.940237	0.986098	0.952172	0.937369	0.138693	0.0335979	0.217489	0.418739	0.000451865	0.270981	0.391869	0.0486738	0.789989	0.00529057	0.0449648	0.109037	5	18	0.277778
RPA1	201528_at				0.535573	0.372408	0.295585	0.956296	0.137243	0.489631	0.683524	0.528195	0.0125095	0.853935	0.0392357	0.406285	0.203148	0.0250516	0.0309072	0.622546	0.0737908	0.0213297	5	18	0.277778
RPE	216574_s_at				0.68406	0.283728	0.223344	0.174156	0.449209	0.213523	0.00468955	0.0882329	0.00024313	0.301062	0.157582	0.0167735	0.85768	0.361546	0.00581047	0.712095	0.22362	0.00546184	5	18	0.277778
RPL23	215224_at				0.141562	0.811825	0.0371719	0.0347813	0.0202953	0.0192447	0.580263	0.95363	0.26179	0.0246162	0.836411	0.487645	0.263454	0.930896	0.265622	0.0615377	0.716475	0.79029	5	18	0.277778
RPL30	200062_s_at				0.675507	0.958232	0.170778	0.370545	0.345809	0.544536	0.385548	0.96937	0.00144393	0.136972	0.649832	0.396867	0.0484559	0.146599	0.00687848	0.0217904	0.96103	0.0187021	5	18	0.277778
RPL34	200026_at				0.65788	0.263687	0.0169841	0.528396	0.0267443	0.740495	0.368931	0.338151	0.59223	0.220863	0.99247	0.0222106	0.0683002	0.190904	0.00147288	0.0337092	0.726391	0.19404	5	18	0.277778
RPL36AL	207585_s_at				0.146664	0.19794	0.0100989	0.365646	0.0145836	0.598411	0.562136	0.49322	0.00843218	0.38619	0.632629	0.982581	0.662216	0.0858737	0.0343943	0.0145981	0.574561	0.282745	5	18	0.277778
RPL7	212042_x_at				0.159112	0.596407	0.118958	0.419986	0.00982131	0.11794	0.891524	0.44694	0.00650858	0.200814	0.849413	0.0313858	0.439498	0.978316	0.00026269	0.000184366	0.346018	0.179649	5	18	0.277778
RPL7P47	212042_x_at				0.159112	0.596407	0.118958	0.419986	0.00982131	0.11794	0.891524	0.44694	0.00650858	0.200814	0.849413	0.0313858	0.439498	0.978316	0.00026269	0.000184366	0.346018	0.179649	5	18	0.277778
RPLP2	200909_s_at				0.654452	0.922544	0.0332369	0.902328	0.0196611	0.599344	0.195881	0.0378895	0.988266	0.00367787	0.606093	0.662717	0.169396	0.241161	0.428511	0.000657285	0.551168	0.375509	5	18	0.277778
RPS25	200091_s_at				0.481401	0.703173	0.0419135	0.729036	0.0426531	0.429356	0.896971	0.75071	0.397732	0.17057	0.666293	0.0979397	0.0254383	0.619269	0.00611229	0.0115722	0.876176	0.109364	5	18	0.277778
RSBN1	213694_at				0.265816	0.860829	0.729431	0.607196	0.483313	0.780456	0.271024	0.702775	0.010332	0.375652	0.712561	0.887651	0.128797	0.0254325	0.0773074	4.65e-05	0.0401298	0.0122511	5	18	0.277778
RTN2	204217_s_at				0.00961955	0.5031	0.0255832	0.9686	0.0924951	0.899503	0.247674	0.236362	0.00141343	0.769877	0.160479	0.260829	0.0359382	0.0296042	0.634801	0.90827	0.302929	0.182243	5	18	0.277778
RUNX1	209360_s_at				0.76483	0.93996	0.97614	0.620938	0.205925	0.0586349	0.0133695	0.0177177	0.380235	0.186903	0.505209	0.0159648	0.0128126	0.0163076	0.525766	0.275647	0.425745	0.414409	5	18	0.277778
RXRA	202426_s_at				0.503409	0.621739	0.78575	0.852931	0.533152	0.467039	0.290898	0.40985	0.0425246	0.748315	0.0875927	0.180194	0.0288153	0.0490027	0.198496	0.0440057	0.82827	0.00554098	5	18	0.277778
S100A9	203535_at				0.482906	0.153094	0.321686	0.0321255	0.776518	0.365462	0.000119554	0.0558041	0.0598385	0.0463543	0.346135	0.203814	0.66795	0.017969	0.929976	0.767611	0.271209	0.000168995	5	18	0.277778
S1PR2	208537_at				0.0311242	0.0389969	0.6521	0.57231	0.801268	0.638041	0.0566604	0.276284	0.00608059	0.0867707	0.0270528	0.870156	0.388684	0.813204	0.0412971	0.920801	0.340746	0.155566	5	18	0.277778
S1PR4	206437_at				0.00344702	0.188198	0.127699	0.550856	0.0494206	0.363774	0.871384	0.406087	0.0384662	0.0317271	0.185291	0.982899	0.825533	0.063147	0.65409	0.466274	0.100067	0.00778526	5	18	0.277778
SAMSN1	220330_s_at				0.93904	0.65775	0.265835	0.722785	0.638916	0.202847	0.00492469	0.000261348	0.0219523	0.413893	0.594863	0.0950473	0.00223531	0.737501	0.00526157	0.957575	0.100127	0.617302	5	18	0.277778
SC5DL	211423_s_at				0.591514	0.279928	0.646905	0.784148	0.532436	0.942544	0.0188579	0.0498837	0.00455979	0.124631	0.166413	0.28291	0.577652	0.0733864	0.000632646	0.401876	0.0110386	0.246038	5	18	0.277778
SCPEP1	218217_at				0.869425	0.191048	0.764801	0.745954	0.0492384	0.259718	0.778587	0.425546	0.0150987	0.915426	0.16644	0.0111611	0.0213156	0.886093	0.00277774	0.614831	0.274566	0.394658	5	18	0.277778
SEC13	207707_s_at				0.964591	0.290661	0.0354075	0.0292826	0.0465657	0.09355	0.223119	0.242578	0.00333287	0.0760044	0.882282	0.14232	0.141332	0.639322	0.920638	0.247445	0.892099	0.00109308	5	18	0.277778
SEC61B	203133_at				0.424662	0.657376	0.112602	0.461536	0.02521	0.293893	0.539434	0.908958	0.0287221	0.0098606	0.495106	0.79008	0.765613	0.352651	0.00186602	0.0204791	0.645175	0.91426	5	18	0.277778
SELL	204563_at				0.286325	0.0233066	0.247759	0.0292231	0.338867	0.0277808	0.0967219	0.115858	0.0787513	0.0891145	0.338031	0.425847	0.415796	0.320107	0.00783073	0.0488935	0.0944312	0.101823	5	18	0.277778
SEMA3G	219689_at				0.730744	0.725428	0.734124	0.01758	0.766699	0.0160638	0.0773202	0.0728066	0.0139306	0.215759	0.851484	0.216216	0.0933377	0.0934675	0.37181	0.152486	0.0258615	0.0122321	5	18	0.277778
SF3B3	200687_s_at				0.890283	0.115435	0.000278581	0.00947775	0.00367761	0.11824	0.100999	0.287678	0.61854	0.27763	0.189712	0.107756	0.542292	0.151757	0.168697	5.73e-05	0.869014	0.0223427	5	18	0.277778
SFSWAP	202774_s_at				0.0200789	0.172251	0.01396	0.680336	0.0697607	0.717163	0.573802	0.736028	0.0350679	0.659514	0.0136726	0.374967	0.00380121	0.445839	0.349675	0.28721	0.568721	0.2997	5	18	0.277778
SGMS1	212989_at				0.768919	0.376962	0.24118	0.674796	0.663024	0.7965	0.24552	0.149089	0.00517085	0.627739	0.286341	0.162075	0.00610831	0.209849	0.0478207	0.0197354	0.210273	0.0218194	5	18	0.277778
SH3GLB1	209090_s_at				0.383877	0.389082	0.161733	0.0146202	0.507029	0.204757	0.923058	0.64938	0.00989065	0.306292	0.840248	0.84756	0.00016269	0.00205353	0.114308	0.0183217	0.103946	0.166809	5	18	0.277778
SHB	204656_at				0.100286	0.0408046	0.0295383	0.00839143	0.310891	0.137189	0.0364086	0.185081	0.0808851	0.473222	0.142106	0.0388071	0.672161	0.127938	0.108854	0.389701	0.899641	0.072597	5	18	0.277778
SHQ1	219083_at				0.118467	0.555203	0.895712	0.882026	0.849293	0.900338	0.835605	0.766904	0.0298992	0.0836932	0.195851	0.0389475	0.136543	0.150456	0.0184752	0.00471743	0.211654	0.00509157	5	18	0.277778
SIKE1	221705_s_at				0.195666	0.735797	0.00234233	0.029596	0.157063	0.373072	0.227801	0.625673	0.0455571	0.997592	0.379148	0.673649	0.254614	0.493725	0.241886	0.00269527	0.655909	0.00647311	5	18	0.277778
SIRPA	202897_at				0.0377748	0.262376	0.181951	0.520189	0.43992	0.264171	0.0214613	0.020818	0.937506	0.425849	0.0573865	0.107284	0.0365254	0.161641	0.0383855	0.393289	0.0996545	0.432287	5	18	0.277778
SIVA1	222030_at				0.138773	0.94012	0.892475	0.0439618	0.751425	0.0489163	0.607018	0.613891	0.367258	0.810821	0.438967	0.53169	0.00430216	0.499255	0.0285258	0.00331897	0.339401	0.309854	5	18	0.277778
SKP1	200719_at				0.118709	0.647438	0.0125741	0.106881	0.134573	0.35176	0.0184742	0.0274846	0.206684	0.40081	0.111536	0.534164	0.124406	0.0920317	0.0606537	0.0121484	0.0190834	0.982223	5	18	0.277778
SLC24A1	206081_at				0.0176795	0.038838	0.890337	0.620698	0.0369111	0.329769	0.39913	0.678972	0.0398326	0.276982	0.378489	0.481276	0.0322939	0.373128	0.0748955	0.0606161	0.92177	0.814477	5	18	0.277778
SLC25A12	203339_at				0.747689	0.491531	0.234978	0.177444	0.536104	0.469359	0.196042	0.0280006	0.021967	0.79486	0.914579	0.323385	0.242755	0.0105841	0.500373	0.0218863	0.110221	0.0407812	5	18	0.277778
SLC26A2	205097_at				0.286392	0.414465	0.473654	0.383673	0.25911	0.626479	0.401507	0.245149	0.0042364	0.711804	0.00760744	0.373852	0.00919823	0.253795	0.271923	0.013384	0.887073	0.011729	5	18	0.277778
SLC38A2	220924_s_at				0.722866	0.0284758	0.997041	0.928706	0.313304	0.260719	0.905605	0.88278	0.0276722	0.581753	0.584055	0.00782081	0.0363649	0.11777	0.511234	0.0112426	0.570333	0.68866	5	18	0.277778
SLC4A7	209884_s_at				0.779984	0.571145	0.745709	0.986416	0.704693	0.895237	0.0453935	0.0391437	0.0102245	0.713849	0.311955	0.0237971	0.415404	0.328359	0.0739568	0.195368	0.233996	0.0292491	5	18	0.277778
SLC5A3	212944_at				0.513247	0.468879	0.0268135	0.125178	0.00332378	0.00968436	0.518308	0.72463	0.165155	0.130735	0.347057	0.602354	0.562028	0.0169795	0.134657	0.166128	0.749727	0.00193057	5	18	0.277778
SMAP1	218137_s_at				0.335858	0.585128	0.774918	0.900821	0.466921	0.366806	0.00716504	0.0224123	0.006975	0.662334	0.177308	0.740713	0.0146687	0.156093	0.00516544	0.10745	0.281079	0.32114	5	18	0.277778
SMEK2	222270_at				0.316807	0.346874	0.00595753	0.174294	0.0178614	0.607598	0.404296	0.704461	0.0380337	0.930814	0.918149	0.559216	0.0205361	0.724921	0.00313346	0.517203	0.268782	0.22022	5	18	0.277778
SMG9	221335_x_at				0.0938183	0.820802	0.0029158	0.468773	0.0121866	0.267166	0.0170649	0.215134	0.00770705	0.931685	0.844329	0.231858	0.652845	0.174994	0.547835	0.0328637	0.252537	0.713731	5	18	0.277778
SNAPC4	215926_x_at				0.0505993	0.809571	0.150119	0.312201	0.185263	0.0671012	0.00761141	0.0351574	0.00668592	0.404082	0.356523	0.924311	0.0471064	0.136318	0.0893946	0.00533836	0.366719	0.334443	5	18	0.277778
SNED1	213488_at				0.136891	0.0451053	0.565435	0.0361385	0.458239	0.0316233	0.443567	0.574796	0.162494	0.333591	0.224699	0.295017	0.0252554	0.237613	0.94206	0.0292062	0.407179	0.855399	5	18	0.277778
SNF8	218391_at				0.633196	0.672208	0.0680116	0.178442	0.0215207	0.0298473	0.400842	0.154452	0.00541832	0.684182	0.292167	0.500855	0.227395	0.118181	0.119741	0.000102198	0.795197	0.0288461	5	18	0.277778
SNORA21	215224_at				0.141562	0.811825	0.0371719	0.0347813	0.0202953	0.0192447	0.580263	0.95363	0.26179	0.0246162	0.836411	0.487645	0.263454	0.930896	0.265622	0.0615377	0.716475	0.79029	5	18	0.277778
SNORA34	221821_s_at				0.326014	0.231941	0.00438522	0.084802	0.0748148	0.703998	0.989247	0.683416	0.00515661	0.550348	0.277937	0.28757	0.516842	0.00439204	0.0273992	0.195897	0.734425	0.0104886	5	18	0.277778
SNX19	202359_s_at				0.0534168	0.0646181	0.0847986	0.0359134	0.706502	0.973302	0.0126667	0.0711936	0.209034	0.89264	0.0224679	0.163521	0.0160743	0.821543	0.814071	0.997272	0.0450589	0.434011	5	18	0.277778
SNX3	213545_x_at				0.929817	0.0712017	0.342818	0.572881	0.715097	0.958264	0.0467523	0.0346915	0.00327655	0.201765	0.419698	0.314755	0.172343	0.152294	0.0389202	0.0392092	0.272532	0.762755	5	18	0.277778
SOCS5	209647_s_at				0.988938	0.506311	0.281145	0.576569	0.513854	0.238015	0.601391	0.764464	0.0105076	0.258726	0.254778	0.320938	0.00997491	0.231644	0.680005	0.00757536	0.0330979	0.0132141	5	18	0.277778
SOHLH2	220129_at				0.395427	0.529868	0.090888	0.00935579	0.0255932	0.0003192	0.619568	0.381107	0.00930775	0.605064	0.541563	0.495813	0.0736924	0.248045	0.999293	0.00957458	0.844749	0.365219	5	18	0.277778
SOX4	201418_s_at				0.902203	0.554023	0.00331354	0.0192223	0.420425	0.240786	0.694791	0.19368	0.00171598	0.241634	0.427065	0.59017	0.874056	0.914888	0.099201	0.012415	0.38036	0.0257558	5	18	0.277778
SPCS3	221844_x_at				0.197044	0.400423	0.808199	0.375384	0.0282583	0.0179683	0.531954	0.405227	0.105237	0.723365	0.746129	0.0205942	0.954333	0.433545	0.321825	0.000528062	0.0445823	0.680697	5	18	0.277778
SRP72	208802_at				0.610795	0.68447	0.717199	0.75327	0.82661	0.641607	0.0444965	0.0291883	0.000165554	0.513895	0.321269	0.842661	0.239954	0.38617	0.018846	0.551052	0.626917	0.0146158	5	18	0.277778
SRRM1	201225_s_at				0.0371983	0.973235	0.0674507	0.0784401	0.451564	0.443697	0.809211	0.423168	0.00116419	0.716843	0.151935	0.746119	0.514127	0.0266003	0.524442	7.93e-06	0.439899	0.0420546	5	18	0.277778
SRSF10	206095_s_at				0.547371	0.461308	0.584581	0.548923	0.597474	0.850192	0.516235	0.733498	0.000194961	0.841691	0.281535	0.491565	0.478713	0.0281336	0.0366054	0.0265527	0.00339616	0.130044	5	18	0.277778
SRSF3	208673_s_at				0.0392348	0.365453	0.818352	0.534128	0.880992	0.691542	0.642133	0.380306	0.00663344	0.571948	0.918756	0.0264978	0.450643	0.107498	0.474008	0.0154408	0.0424601	0.176156	5	18	0.277778
STAU2	204226_at				0.693755	0.329953	0.801221	0.574738	0.752511	0.628072	0.477545	0.932802	0.210181	0.463067	0.347667	0.319309	0.0254645	0.145037	0.00827373	0.00265287	0.00432892	0.00382322	5	18	0.277778
STK17A	202693_s_at				0.995396	0.536995	0.688795	0.983338	0.863764	0.753405	0.719041	0.893671	0.0720926	0.000839731	0.882021	0.00207106	0.0236455	0.141334	0.0053368	0.885915	0.0468649	0.754854	5	18	0.277778
STK38L	212565_at				0.478119	0.0475069	0.338955	0.691962	0.0106771	0.227603	0.368409	0.789404	0.948285	0.624154	0.380242	0.0360177	0.00823601	0.391114	0.0811544	0.00250789	0.200823	0.0885717	5	18	0.277778
STMN3	218207_s_at				0.682786	0.259778	0.010483	0.0765516	0.0258015	0.0358954	0.184234	0.154397	0.0162984	0.390659	0.153465	0.066706	0.709464	0.309187	0.886197	0.0496373	0.249634	0.372844	5	18	0.277778
STMN4	221236_s_at				0.13135	0.395386	0.022699	0.420264	0.0469909	0.923966	0.228978	0.0999441	0.0435422	0.186491	0.18937	0.0132751	0.091768	0.721029	0.779128	0.0684965	0.846619	0.0471749	5	18	0.277778
STX18	218763_at				0.633139	0.65358	0.0393992	0.431868	0.00343284	0.275989	0.370191	0.451327	0.00316201	0.400749	0.430938	0.0478112	0.0721444	0.328824	0.386011	0.00533181	0.827554	0.235742	5	18	0.277778
SUCLG2	215772_x_at				0.134049	0.293284	0.389848	0.726642	0.841313	0.532266	0.0969129	0.0365071	0.00211199	0.290238	0.175199	0.515599	0.432386	0.0532963	0.00932087	0.447345	0.0147082	0.0443539	5	18	0.277778
SUCLG2P2	214835_s_at				0.0633351	0.842733	0.396866	0.926965	0.988322	0.186932	0.123052	0.0210372	0.00134246	0.196258	0.225205	0.399354	0.424919	0.303325	0.0069772	0.0482392	0.119547	0.00506155	5	18	0.277778
SUZ12	212287_at				0.225061	0.894916	0.0404103	0.397329	0.55808	0.689727	0.1249	0.0465734	0.00936407	0.892553	0.508349	0.216864	0.12353	0.0483394	0.0782038	0.520276	0.515034	0.0197282	5	18	0.277778
TAX1BP3	209154_at				0.67548	0.964229	0.618465	0.845404	0.455775	0.312042	0.0204128	0.0793952	0.421771	0.228571	0.735768	0.00421057	0.0320476	0.582293	0.00566523	0.846416	0.281331	0.0168147	5	18	0.277778
TBC1D8	204526_s_at				0.65918	0.0132554	0.0681477	0.0063682	0.517168	0.304672	0.100463	0.108042	0.583427	0.197101	0.337378	0.0266798	0.00207212	0.0962207	0.562889	0.0146523	0.486448	0.779423	5	18	0.277778
TBCB	216194_s_at				0.432427	0.504241	0.105053	0.981789	0.0477594	0.509149	0.085023	0.0480573	0.0204641	0.15547	0.802264	0.263395	0.441279	0.710062	0.460805	0.00924257	0.677857	0.00913339	5	18	0.277778
TBCC	202495_at				0.683164	0.995222	0.849447	0.0473279	0.669077	0.156752	0.707525	0.264544	0.0307741	0.313098	0.183462	0.289151	0.278764	0.0421547	0.442273	0.0367875	0.790397	0.0218216	5	18	0.277778
TBL1XR1	221428_s_at				0.0301673	0.655762	0.749939	0.382669	0.788211	0.84852	0.0119335	0.0353676	0.00891626	0.493212	0.124536	0.369139	0.0176919	0.675749	0.969228	0.0600384	0.664443	0.115539	5	18	0.277778
TBXA2R	211590_x_at				0.217937	0.266248	0.217151	0.363703	0.640531	0.344384	0.0140299	0.00216513	0.126569	0.0148736	0.831128	0.4692	0.00842316	0.0398024	0.759271	0.989375	0.443421	0.0718026	5	18	0.277778
TCF3	209151_x_at				0.155613	0.390634	0.0109928	0.0838487	0.863723	0.450362	0.0193492	0.00711879	0.00280582	0.1446	0.163148	0.210014	0.277501	0.895275	0.18605	0.00235821	0.21098	0.310243	5	18	0.277778
TCL6	219839_x_at				0.674477	0.541947	0.937676	0.822049	0.764495	0.821524	0.971755	0.301912	0.024785	0.159751	0.758078	0.0162196	0.00239958	0.842935	0.00104412	0.0299088	0.525926	0.586344	5	18	0.277778
TCOF1	202385_s_at				0.404175	0.634126	0.401649	0.348185	0.226629	0.654611	0.00756226	0.0201553	0.0180356	0.145835	0.504604	0.0188221	0.159241	0.757068	0.472415	0.425829	0.0108844	0.924323	5	18	0.277778
TFB2M	218605_at				0.604628	0.464473	0.00153044	0.0569531	0.538971	0.63599	0.00809701	0.00677574	0.00157814	0.804469	0.107699	0.267548	0.565685	0.0877738	0.155042	0.660316	0.0955855	0.0403979	5	18	0.277778
TGFBR2	208944_at				0.950022	0.277898	0.27719	0.193153	0.422986	0.369603	0.167959	0.461251	0.000812737	0.612904	0.194961	0.0480083	0.0124457	0.177941	0.0283209	0.0346567	0.204177	0.893936	5	18	0.277778
THADA	220212_s_at				0.83176	0.612546	0.15573	0.0126287	0.244558	0.999946	0.684601	0.856891	0.129281	0.476474	0.190661	0.0133196	0.0068423	0.786318	0.655714	0.01535	0.783277	0.0338818	5	18	0.277778
TINAGL1	219058_x_at				0.0282923	0.548786	0.248477	0.163564	0.809754	0.235024	0.190302	0.0393433	0.0103704	0.0495022	0.593558	0.649919	0.97449	0.119068	0.36446	0.922902	0.77052	0.0433294	5	18	0.277778
TIPRL	214773_x_at				0.364583	0.953921	0.0393511	0.594053	0.0308652	0.411987	0.186526	0.166142	0.854738	0.683322	0.0845663	0.598369	0.251816	0.0186091	0.00839962	0.363385	0.676081	0.00179265	5	18	0.277778
TKT	208699_x_at				0.0861722	0.360102	0.30665	0.208748	0.230554	0.0229609	0.518897	0.601439	0.0179404	0.0749868	0.0306486	0.655434	0.116051	0.402521	0.660197	0.00100855	0.567871	0.00425337	5	18	0.277778
TLE3	212770_at				0.690635	0.658918	0.0474269	0.724648	0.00978928	0.449801	0.154095	0.163258	0.59667	0.511058	0.741821	0.0480633	0.0187678	0.147547	0.729456	0.143488	0.863453	0.0214145	5	18	0.277778
TLN2	212701_at				0.507046	0.703816	0.0136741	0.0200597	0.0274272	0.0291837	0.917422	0.943602	0.374949	0.761264	0.443003	0.672565	0.0266729	0.320128	0.604101	0.109452	0.135445	0.0928156	5	18	0.277778
TLR2	204924_at				0.655074	0.930086	0.00165614	0.00454025	0.395521	0.259817	0.511682	0.512345	0.283155	0.79219	0.36445	0.0266131	0.0350125	0.102775	0.268874	0.002184	0.670676	0.094865	5	18	0.277778
TMC6	214958_s_at				0.686882	0.128563	0.302336	0.48329	0.362122	0.918126	0.371646	0.0223744	0.0345106	0.110311	0.234455	0.356979	0.27745	0.0297539	0.702337	0.0220436	0.0175339	0.832764	5	18	0.277778
TMED1	203679_at				0.924284	0.599261	0.024414	0.425366	0.0141641	0.234081	0.0461552	0.0793764	0.0153939	0.163056	0.535112	0.996207	0.651229	0.19416	0.455098	0.0925944	0.171523	0.00370056	5	18	0.277778
TMEM135	222209_s_at				0.78631	0.434533	0.749661	0.475729	0.789972	0.497598	0.0449724	0.197642	0.0019315	0.718677	0.0407797	0.937077	0.271015	0.379671	0.0134997	0.145661	0.980677	0.000861907	5	18	0.277778
TMEM183A	212164_at				0.745448	0.499474	0.264038	0.874079	0.0443507	0.181449	0.784192	0.903664	0.258343	0.0958545	0.0203126	0.0395843	0.0259381	0.460049	0.814932	0.0289668	0.271271	0.950283	5	18	0.277778
TMEM19	219941_at				0.406564	0.229888	0.706859	0.504829	0.147083	0.520893	0.0167104	0.173455	0.0144837	0.0261048	0.902171	0.75975	0.0197923	0.376133	0.0864207	0.0431203	0.793078	0.100839	5	18	0.277778
TMEM194A	212621_at				0.52856	0.0380214	0.595649	0.345435	0.244168	0.160706	0.424335	0.137267	0.315685	0.371889	0.17406	0.86295	0.0481753	0.0113296	0.304184	0.00734484	0.179991	0.00346946	5	18	0.277778
TMEM30B	213285_at				0.447068	0.564147	0.278198	0.0214547	0.267381	0.0156387	0.609151	0.498259	0.00563986	0.577328	0.562295	0.157598	0.139418	0.00532602	0.0357954	0.829213	0.639545	0.363094	5	18	0.277778
TMOD1	203661_s_at				0.312659	0.446076	0.0299749	0.909768	0.10592	0.8294	0.0334763	0.0199395	0.0244624	0.0949382	0.981702	0.439744	0.904576	0.278602	0.411675	0.352455	0.140497	0.00447045	5	18	0.277778
TMPRSS3	220177_s_at				0.262749	0.295982	0.751446	0.68895	0.295673	0.0210363	0.537725	0.0883337	0.00341952	0.340582	0.942484	0.121417	0.563566	0.00208284	0.523769	0.0123794	0.385701	0.032974	5	18	0.277778
TMX1	209476_at				0.256163	0.818835	0.780413	0.748133	0.402895	0.708144	0.27797	0.174812	0.000495604	0.879308	0.0344972	0.0238792	0.110157	0.0644251	0.00533382	0.114258	0.151498	0.00390036	5	18	0.277778
TNFAIP8	208296_x_at				0.199788	0.30517	0.160719	0.0922024	0.0383	0.032961	0.819888	0.628722	0.881932	0.431913	0.508788	0.958046	0.0113063	0.87168	0.0064416	0.0778406	0.102874	0.00240795	5	18	0.277778
TNFRSF10C	211163_s_at				0.122982	0.988179	0.0671447	0.00636257	0.247104	0.00634997	0.694528	0.896109	0.00762855	0.108394	0.153743	0.473514	0.749432	0.144875	0.399118	0.0158472	0.161035	0.0210389	5	18	0.277778
TNPO1	221829_s_at				0.0689617	0.145364	0.00393922	0.298691	0.0151351	0.182389	0.255807	0.471919	0.00784379	0.66163	0.0353133	0.394758	0.658675	0.22998	0.0475236	0.147917	0.886727	0.282266	5	18	0.277778
TNPO2	221507_at				0.732149	0.0569458	0.172714	0.0728647	0.00252173	0.0197906	0.656374	0.20913	0.0340459	0.824205	0.0526524	0.483827	0.707881	0.744575	0.181613	0.038175	0.0153219	0.123397	5	18	0.277778
TOMM70A	201519_at				0.583628	0.271812	0.0349313	0.00997134	0.606922	0.970382	0.223515	0.0863739	0.00803651	0.601077	0.139274	0.298874	0.102276	0.0503637	0.0206117	0.0598554	0.146017	0.00262999	5	18	0.277778
TP53I3	210609_s_at				0.0479259	0.533936	0.346084	0.580287	0.555731	0.503721	0.0458442	0.144889	0.679222	0.441434	0.976908	0.0163661	0.0341113	0.689102	0.326213	0.90518	0.0949022	0.0485827	5	18	0.277778
TP63	207382_at				0.194319	0.909608	0.025908	0.0318795	0.171978	0.0899767	0.0533027	0.0578981	0.0210556	0.0428149	0.866875	0.717248	0.697454	0.363977	0.617796	0.0771179	0.862703	0.002599	5	18	0.277778
TPM4	212481_s_at				0.0656978	0.838314	0.152124	0.199043	0.185113	0.247206	0.011441	0.00357466	0.704317	0.508732	0.903218	0.00130438	0.0070421	0.0859759	0.261678	5.89e-05	0.184231	0.681447	5	18	0.277778
TPSAB1	207134_x_at				0.375867	0.165447	0.284263	0.869003	0.0341284	0.217285	0.184181	0.184771	0.014168	0.120401	0.0215403	0.193335	0.0386791	0.0356916	0.656413	0.179764	0.0970293	0.445458	5	18	0.277778
TPSB2	207134_x_at				0.375867	0.165447	0.284263	0.869003	0.0341284	0.217285	0.184181	0.184771	0.014168	0.120401	0.0215403	0.193335	0.0386791	0.0356916	0.656413	0.179764	0.0970293	0.445458	5	18	0.277778
TRABD	221807_s_at				0.0352927	0.581199	0.183984	0.349623	0.329502	0.598976	0.0374039	0.173569	0.320708	0.477243	0.367726	0.411291	0.215168	0.0388538	0.274316	0.000548084	0.147539	0.021854	5	18	0.277778
TRAM1	201398_s_at				0.0486504	0.844652	0.538113	0.682931	0.289695	0.320398	0.35947	0.300108	0.0164884	0.829897	0.530728	0.161882	0.140395	0.634475	0.0398617	0.0491067	0.361195	0.00183429	5	18	0.277778
TREM1	219434_at				0.026851	0.82958	0.330562	0.0691931	0.710376	0.37829	0.0968448	0.247903	0.0216211	0.0357467	0.732566	0.855072	0.738974	0.923916	0.528278	0.0215086	0.340706	0.0417686	5	18	0.277778
TRIM23	204732_s_at				0.210757	0.454948	0.630406	0.795221	0.781278	0.631371	0.0455818	0.279503	0.0275323	0.666504	0.175855	0.481526	0.0303942	0.0491362	0.352456	0.722318	0.22304	0.0239524	5	18	0.277778
TRIM33	212436_at				0.621234	0.0362235	0.316612	0.89196	0.702869	0.336996	0.104958	0.139261	0.00697983	0.749946	0.650583	0.609089	0.0169605	0.0811134	0.314509	0.00923473	0.00614103	0.347982	5	18	0.277778
TRIP11	209778_at				0.827041	0.873117	0.103831	0.0277104	0.817154	0.853085	0.220329	0.102071	0.87716	0.56041	0.554777	0.493144	0.010094	0.0784152	0.0221607	1.05e-06	0.028704	0.115804	5	18	0.277778
TRMT11	218877_s_at				0.410847	0.408915	0.837377	0.494403	0.235162	0.9352	0.0269731	0.130308	0.00238629	0.345167	0.276711	0.952539	0.420379	0.0281263	0.0146766	0.442757	0.0289487	0.474555	5	18	0.277778
TRMT13	219130_at				0.448258	0.723355	0.0167499	0.217513	0.0637915	0.369997	0.0788908	0.0169636	0.0249935	0.125144	0.0651316	0.915818	0.309587	0.176864	0.274551	0.00970114	0.488616	0.014874	5	18	0.277778
TROVE2	213027_at				0.377356	0.973636	0.441184	0.259445	0.08099	0.467906	0.309256	0.158741	0.0159274	0.902937	0.328372	0.29395	0.0493294	0.121375	0.0157859	0.548282	0.0274591	0.0387013	5	18	0.277778
TSEN2	219581_at				0.0054278	0.490119	0.638411	0.291974	0.855609	0.642711	0.0418411	0.0835945	0.0386574	0.264021	0.201259	0.931148	0.793168	0.141908	0.254823	0.00707167	0.336167	0.0174191	5	18	0.277778
TSR3	213104_at				0.869019	0.941026	0.029056	0.627023	0.0316737	0.669065	0.260316	0.486073	0.0850864	0.381895	0.257203	0.624482	0.216128	0.0401118	0.121228	0.000967744	0.335301	0.00188312	5	18	0.277778
TUBGCP4	211337_s_at				0.325478	0.0547826	0.0261264	0.0623896	0.205033	0.279939	0.18701	0.362466	0.323748	0.180115	0.0334476	0.879826	0.924931	0.0189449	0.934	0.00490865	0.666398	0.0311724	5	18	0.277778
TULP2	206733_at				0.130149	0.796678	0.433588	0.0124752	0.762635	0.0480696	0.205437	0.124164	0.0379094	0.944576	0.0260044	0.0872004	0.232509	0.254172	0.538784	0.186792	0.44678	0.00721865	5	18	0.277778
TXN	208864_s_at				0.630705	0.358478	0.0561701	0.390304	0.00812117	0.160281	0.798112	0.836583	0.0727213	0.112538	0.992509	0.00390347	0.206925	0.0188287	0.00108838	0.0214978	0.556678	0.606643	5	18	0.277778
TYMS	202589_at				0.134963	0.181497	0.823972	0.628901	0.622246	0.34043	0.587303	0.667955	0.913348	0.384417	0.0199225	0.00608483	0.011662	0.617397	0.0226661	0.81507	0.838579	0.0158715	5	18	0.277778
UBC	208980_s_at				0.0194551	0.00790357	0.938624	0.726223	0.296548	0.663287	0.181827	0.712127	0.0860973	0.775774	0.546607	0.898576	0.000294089	0.669256	0.596662	0.00483553	0.223785	0.000103021	5	18	0.277778
UBE2M	203109_at				0.0327617	0.559857	0.277358	0.432561	0.343035	0.485582	0.888487	0.339898	0.000157406	0.508151	0.833856	0.339093	0.316071	0.0305314	0.293763	0.000146362	0.893328	0.000317858	5	18	0.277778
UFL1	212634_at				0.873095	0.45468	0.187453	0.677989	0.204241	0.858839	0.0202032	0.256724	0.000909547	0.554306	0.0215795	0.505738	0.0226586	0.197264	0.0687703	0.83964	0.0844022	0.00222659	5	18	0.277778
UFM1	218050_at				0.196279	0.826407	0.191328	0.142787	0.54081	0.308576	0.344028	0.179163	0.0016795	0.792185	0.830722	0.0387139	0.0484461	0.0453313	0.105885	0.000259723	0.516146	0.126267	5	18	0.277778
UHRF1BP1L	213118_at				0.446832	0.693301	0.0081483	0.13927	0.0287616	0.159629	0.927577	0.320553	0.0146001	0.743955	0.283827	0.346882	0.00743446	0.657576	0.0052058	0.665152	0.0564234	0.724711	5	18	0.277778
UQCRB	209066_x_at				0.751148	0.773497	0.25449	0.380611	0.0377859	0.104595	0.30177	0.516151	0.154614	0.540955	0.245164	0.0221438	0.400027	0.144567	0.0184793	0.000700532	0.745159	0.0244778	5	18	0.277778
USP46	203870_at				0.368404	0.35344	0.586218	0.35778	0.739526	0.0908579	0.193062	0.0566489	0.0312438	0.448652	0.0642814	0.696261	0.0137955	0.882958	0.0344925	0.0288616	0.346029	0.00193747	5	18	0.277778
UTP14A	221514_at				0.210699	0.0687042	0.00327286	0.189674	0.0234183	0.200585	0.0280728	0.0457436	0.0488982	0.423412	0.375166	0.0652611	0.413836	0.728463	0.58421	0.73015	0.189886	0.314886	5	18	0.277778
UTP14C	203614_at				0.774764	0.434377	0.0631667	0.0306983	0.50319	0.186458	0.16483	0.271512	0.0033188	0.0399236	0.63765	0.869483	0.120935	0.148842	0.104323	4.98e-06	0.710275	0.0176558	5	18	0.277778
VCY1B	206922_at				0.790314	0.886499	0.230731	0.890734	0.180071	0.756318	0.0211065	0.0276273	0.00392626	0.564382	0.109491	0.943116	0.0628896	0.207587	0.035942	0.020161	0.651836	0.806025	5	18	0.277778
VCY	206922_at				0.790314	0.886499	0.230731	0.890734	0.180071	0.756318	0.0211065	0.0276273	0.00392626	0.564382	0.109491	0.943116	0.0628896	0.207587	0.035942	0.020161	0.651836	0.806025	5	18	0.277778
VOPP1	208091_s_at				0.262031	0.853494	0.0120607	0.790954	0.0255061	0.51327	0.33917	0.36571	0.401375	0.146085	0.962667	0.00204263	0.00925951	0.430467	0.110853	0.0405633	0.87194	0.0944609	5	18	0.277778
VPS16	215216_at				0.256884	0.0725568	0.0127757	0.00376798	0.0341201	0.0176137	0.83957	0.602435	0.0109258	0.87621	0.70308	0.503303	0.0631445	0.145741	0.84787	0.651703	0.765608	0.339493	5	18	0.277778
WBP11	217822_at				0.0963246	0.443737	0.0339285	0.0329801	0.800395	0.700243	0.0190875	0.0976083	0.0513111	0.176091	0.392542	0.590672	0.585743	0.660987	0.0909549	0.00822062	0.0679292	0.0205975	5	18	0.277778
WDR37	211383_s_at				0.75607	0.346173	0.365499	0.901472	0.9371	0.355923	0.0241093	0.00434088	0.0144195	0.668414	0.105098	0.0622055	0.026605	0.926152	0.559511	0.00398124	0.731234	0.172358	5	18	0.277778
WDR67	214061_at				0.155681	0.11047	0.0368746	0.722279	0.730481	0.273181	0.496716	0.0145956	0.114152	0.194774	0.301651	0.0231694	0.000303208	0.39332	0.399764	0.476575	0.851106	0.0477046	5	18	0.277778
WISP2	205792_at				0.343194	0.435451	0.343083	0.424636	0.117575	0.113057	0.00710776	0.00420253	0.00066381	0.098846	0.563502	0.206216	0.1488	0.0284869	0.730731	0.326887	0.365255	0.00552156	5	18	0.277778
WRB	202749_at				0.998823	0.405137	0.0325429	0.000724096	0.340825	0.162674	0.63825	0.32769	0.00670237	0.0779694	0.536489	0.0192139	0.187034	0.0656495	0.142537	0.686759	0.0346385	0.542415	5	18	0.277778
XRCC5	208643_s_at				0.809171	0.0252153	0.0943063	0.0382602	0.562333	0.269194	0.345076	0.508113	0.00210876	0.675717	0.393793	0.96203	0.0392773	0.285883	0.133906	0.0336708	0.599853	0.233309	5	18	0.277778
XXbac-BPG246D15.9	205671_s_at				0.871913	0.862902	0.483845	0.376639	0.0308075	0.852539	0.857677	0.438989	0.00457101	0.0357221	0.48092	0.0540138	0.0300623	0.0626956	0.708635	0.00191709	0.868316	0.302653	5	18	0.277778
YWHAB	208743_s_at				0.148772	0.34603	0.0684669	0.748127	0.0190822	0.829441	0.972811	0.600448	0.0423781	0.494151	0.173392	0.302088	0.0146663	0.0525568	0.0198151	0.0355526	0.600224	0.127844	5	18	0.277778
ZC3H14	204216_s_at				0.359417	0.397931	0.0048462	0.264772	0.0371236	0.153307	0.806627	0.648824	0.00518921	0.471597	0.897581	0.110504	0.0671953	0.108992	0.909179	0.0496178	0.623859	0.0152556	5	18	0.277778
ZC3H15	201595_s_at				0.68989	0.157221	0.643123	0.165983	0.668084	0.442705	0.232182	0.200037	0.000568355	0.596073	0.0380703	0.184093	0.36651	0.337486	0.00147185	0.00407178	0.128224	0.0306505	5	18	0.277778
ZFHX2	207699_at				0.160391	0.534675	0.0496314	0.94581	0.0158497	0.478082	0.200629	0.100688	0.0188828	0.533605	0.332105	0.0421999	0.178095	0.129484	0.779461	0.727817	0.176326	0.0365764	5	18	0.277778
ZFHX4	219779_at				0.0320708	0.0456124	0.795352	0.478443	0.517794	0.910129	0.492347	0.86147	0.0143492	0.0689001	0.706135	0.0998055	0.751457	0.0220834	0.216642	0.337543	0.0330315	0.0672663	5	18	0.277778
ZFP36	201531_at				0.220783	0.00792883	0.0120223	0.058219	0.0165799	0.0365507	0.400736	0.659681	0.316243	0.0241733	0.952189	0.311936	0.399189	0.979039	0.501286	0.204574	0.867172	0.112278	5	18	0.277778
ZIC1	206373_at				0.00677299	0.838732	0.0418901	0.035939	0.212434	0.188196	0.207395	0.0688887	0.00035085	0.815999	0.536447	0.759718	0.766719	0.339121	0.606931	0.000432971	0.583235	0.319985	5	18	0.277778
ZMYM5	215948_x_at				0.462157	0.176957	0.0369923	0.21955	0.040015	0.242291	0.208663	0.221088	0.816322	0.871643	0.829212	0.210005	0.441187	0.724992	0.0112942	0.211605	0.0153056	0.0160658	5	18	0.277778
ZNF143	221873_at				0.217374	0.681689	0.112794	0.0714573	0.105194	0.022233	0.384126	0.587025	0.0148848	0.7527	0.228117	0.0324286	0.787503	0.547554	0.0222805	0.839438	0.0220999	0.70145	5	18	0.277778
ZNF214	220497_at				0.890437	0.447862	0.00686495	0.210251	0.0496389	0.556963	0.331573	0.979358	0.0239878	0.536232	0.616251	0.103962	0.842862	0.172674	0.338709	0.0107583	0.529816	0.0035399	5	18	0.277778
ZNF221	220847_x_at				0.314284	0.399697	0.22292	0.216504	0.647542	0.25558	0.053851	0.164773	0.0442436	0.0253928	0.737705	0.0309482	0.207998	0.170677	0.936087	0.0380574	0.966572	0.0320636	5	18	0.277778
ZNF236	47571_at				0.540118	0.884161	0.0433203	0.195126	0.00190948	0.0456208	0.68884	0.483672	0.257242	0.828396	0.497733	0.989268	0.0482109	0.886472	0.818204	0.0233483	0.799604	0.878522	5	18	0.277778
ZNF274	204937_s_at				0.430289	0.1298	0.000159623	0.00786022	0.019263	0.203394	0.203018	0.399821	0.607354	0.798704	0.934524	0.962317	0.0786393	0.849754	0.717602	0.0487627	0.0407128	0.0975799	5	18	0.277778
ZNF277	218645_at				0.970944	0.93286	0.890152	0.897123	0.97995	0.956861	0.0402467	0.0707484	0.00312761	0.317592	0.362207	0.789087	0.0317641	0.387132	0.0178772	0.137412	0.132324	0.0326868	5	18	0.277778
ZNF285	222237_s_at				0.0413429	0.83227	0.0110856	0.150027	0.113048	0.531518	0.494892	0.214705	0.0976971	0.450998	0.95125	0.692628	0.162377	0.034012	0.069214	0.0022382	0.316065	0.0286802	5	18	0.277778
ZNF415	205514_at				0.315492	0.499515	0.00216906	0.193448	0.0732628	0.749609	0.136398	0.0701725	0.0471881	0.215957	0.364217	0.0203119	0.660021	0.469446	0.046008	0.0763171	0.0252069	0.322239	5	18	0.277778
ZNF426	205964_at				0.276735	0.70611	0.0140869	0.855791	0.113854	0.742796	0.00416178	0.0218407	0.193828	0.10239	0.37191	0.367645	0.839079	0.0208342	0.691061	0.0171406	0.472234	0.0572031	5	18	0.277778
ZNF43	206695_x_at				0.0302788	0.189368	0.0255977	0.817442	0.218742	0.591278	0.0325189	0.105686	0.0629665	0.9883	0.747057	0.157875	0.0498213	0.0519904	0.252945	0.452466	0.679254	0.0121927	5	18	0.277778
ZNF443	205928_at				0.430929	0.604849	0.0285808	0.0235362	0.802822	0.719683	0.59161	0.167165	0.0398689	0.689716	0.347365	0.0146563	0.430576	0.0631134	0.219968	0.00709099	0.864515	0.0841961	5	18	0.277778
ZNF614	220721_at				0.68112	0.756013	0.00966305	0.01627	0.0026516	0.0071263	0.300937	0.786731	0.0486166	0.0950935	0.497632	0.450474	0.272972	0.745587	0.243175	0.24975	0.705221	0.314564	5	18	0.277778
ZNF623	206188_at				0.131204	0.746309	0.735647	0.550952	0.0866085	0.231426	0.0159686	0.0928937	0.856832	0.241671	0.632754	0.910146	0.0809362	0.0161262	0.0441923	0.0318798	0.956472	0.00904034	5	18	0.277778
ZNF799	205928_at				0.430929	0.604849	0.0285808	0.0235362	0.802822	0.719683	0.59161	0.167165	0.0398689	0.689716	0.347365	0.0146563	0.430576	0.0631134	0.219968	0.00709099	0.864515	0.0841961	5	18	0.277778
ZWILCH	218349_s_at				0.0232255	0.152662	0.260403	0.330531	0.0824475	0.183005	0.616165	0.00533319	0.662439	0.790457	0.999633	0.495664	0.0237336	0.18984	0.0169337	0.192546	0.978401	0.0242042	5	18	0.277778
AL592188.3	AFFX-M27830_M_at	0.165432	0.10055	0.360419	0.535623	0.414613	0.00983211	0.00639935	0.0255585	0.0557003	0.901678	0.477635	0.00531552	0.679951	0.471543	0.621073	0.00807036	0.808895	0.13407	0.13029	0.550824	0.435361	5	21	0.238095
CCL18	32128_at	0.0478692	0.173121	0.00289584	0.783929	0.276938	0.166954	0.702764	0.174697	0.931488	0.0144927	0.114601	0.0436816	0.816238	0.0516728	0.0805252	0.0058384	0.442651	0.377462	0.829985	0.881958	0.803893	5	21	0.238095
CHST3	32094_at	0.998152	0.685932	8.21e-05	0.733729	0.0966714	0.78861	0.696127	0.816749	0.756361	0.0768483	0.0129296	0.404431	0.203326	0.122391	0.489942	0.0326312	0.0474675	0.552334	0.821051	0.657542	0.0422785	5	21	0.238095
CLCN7	38069_at	0.98347	0.397045	0.057252	0.00786946	0.181836	0.311312	0.653405	0.124298	0.279945	0.029915	0.0147971	0.0177962	0.981127	0.398801	0.513934	0.814126	0.078768	0.230837	0.0320961	0.934192	0.51152	5	21	0.238095
CYP2A6	1494_f_at	0.401505	0.0134181	9.8812e-05	0.390347	0.916616	0.892384	0.677988	0.468132	0.759083	0.468844	0.335046	0.00848428	0.604295	0.856036	0.57562	0.0200804	0.979031	0.876831	0.033186	0.481072	0.102425	5	21	0.238095
CYP2A7	1494_f_at	0.401505	0.0134181	9.8812e-05	0.390347	0.916616	0.892384	0.677988	0.468132	0.759083	0.468844	0.335046	0.00848428	0.604295	0.856036	0.57562	0.0200804	0.979031	0.876831	0.033186	0.481072	0.102425	5	21	0.238095
KRIT1	34031_i_at	0.555499	0.0239841	7.02e-06	0.198407	0.796747	0.0309826	0.300357	0.634267	0.290753	0.309602	0.404893	0.0282436	0.32602	0.689325	0.929598	0.0881096	0.540248	0.140946	0.481952	0.551731	0.00210637	5	21	0.238095
MVK	36907_at	0.978392	0.177818	0.0327643	0.252722	0.262854	0.27214	0.316233	0.0328731	0.113252	0.665658	0.0486075	0.0142628	0.97064	0.766081	0.80039	0.283129	0.0186888	0.661135	0.765162	0.292475	0.582423	5	21	0.238095
NCAPH2	40640_at	0.606939	0.0478014	1.59e-06	0.153217	0.497861	0.295623	0.470824	0.47155	0.333817	0.889116	0.848478	0.0253598	0.64088	0.601492	0.552495	0.0458125	0.268159	0.473372	0.641638	0.836248	0.00150596	5	21	0.238095
NPR1	32625_at	0.0121997	0.794068	2.35e-07	0.953342	0.61469	0.563831	0.0528116	0.250929	0.0140988	0.405159	0.382328	0.00857564	0.971964	0.644938	0.0324902	0.248547	0.382503	0.874569	0.627888	0.587096	0.270836	5	21	0.238095
PRKD2	38269_at	0.535647	0.506655	0.170338	0.581386	0.383632	0.146608	0.01534	0.0223478	0.00165448	0.346589	0.165504	0.0758592	0.148634	0.645718	0.579607	0.216593	0.0390006	0.22009	0.569115	0.292396	0.00109343	5	21	0.238095
PTPN21	1320_at	0.927987	0.0088314	0.000298957	0.0443869	0.499662	0.0183528	0.0880125	0.880503	0.42394	0.867824	0.684606	0.011976	0.700109	0.279591	0.929259	0.12089	0.0519859	0.208639	0.304572	0.870251	0.478254	5	21	0.238095
PVR	32699_s_at	0.758215	0.0304109	1.4e-05	0.363863	0.686766	0.561757	0.786239	0.924305	0.67357	0.0366075	0.0102638	0.104314	0.768128	0.0548985	0.413685	0.090498	0.253517	0.996404	0.065309	0.547	0.0176294	5	21	0.238095
RGS14	38290_at	0.874294	0.447286	3.21e-06	0.980118	0.49796	0.537086	0.212789	0.0157575	0.00161366	0.952386	0.260246	0.0545891	0.10016	0.12878	0.519906	0.60256	0.254854	0.170857	0.0658203	0.0329815	0.0069324	5	21	0.238095
RNF19B	36564_at	0.839941	0.128278	0.00524298	0.046407	0.977411	0.146	0.303347	0.0469945	0.43089	0.0213856	0.0730467	0.448805	0.0672356	0.737705	0.92398	0.804537	0.655131	0.68473	0.00284259	0.822698	0.319141	5	21	0.238095
RP11-617F23.1	37590_g_at	0.0494808	0.0364763	0.0233376	0.825387	0.610036	0.683705	0.424705	0.143924	0.0992938	0.00200207	0.0152332	0.833626	0.671878	0.210641	0.623005	0.961518	0.121318	0.912797	0.111929	0.742644	0.554125	5	21	0.238095
SFN	33322_i_at	0.808933	0.408412	0.0317981	0.210954	0.0993229	0.189565	0.9126	0.00446113	0.1283	0.789413	0.813384	0.116935	0.218335	0.719428	0.487537	0.0240912	0.0994699	0.196072	0.00377923	0.340628	0.0431951	5	21	0.238095
UNC5B	41856_at	0.446423	0.334159	0.00301977	0.542319	0.536233	0.520188	0.0343123	0.200046	0.00783612	0.0825308	0.0400941	0.00860184	0.796138	0.470713	0.811492	0.540443	0.592502	0.459036	0.676005	0.361893	0.178041	5	21	0.238095
WAS	38964_r_at	0.134768	0.0851043	0.382432	0.484241	0.113952	0.368578	0.00385184	0.442845	0.002076	0.0293039	0.216772	0.0522399	0.0282939	0.712167	0.683832	0.20518	0.851004	0.491856	0.00213952	0.364873	0.681233	5	21	0.238095
Y_RNA	34031_i_at	0.555499	0.0239841	7.02e-06	0.198407	0.796747	0.0309826	0.300357	0.634267	0.290753	0.309602	0.404893	0.0282436	0.32602	0.689325	0.929598	0.0881096	0.540248	0.140946	0.481952	0.551731	0.00210637	5	21	0.238095
2012-09-06	214298_x_at				0.927033	0.326145	0.0010321	0.30696	0.00315658	0.20693	0.79488	0.847006	0.00227348	0.278664	0.523695	0.90069	0.0135136	0.604019		0.246956	0.894799	0.134561	4	17	0.235294
KCNH6	221023_s_at				0.90566	0.184233	0.0785934	0.569903	0.933505	0.476823	0.985094	0.617322	0.0327039	0.57389		0.863778	0.0381147	0.0180056	0.0417214	0.275997	0.352219	0.219106	4	17	0.235294
KRT6A	209126_x_at				0.988971	0.817742	0.584394	0.152215	0.395593	0.355151	0.0487974	0.0750259	0.0271225	0.0219136		0.192039	0.554358	0.0107632	0.306886	0.93585	0.77339	0.908475	4	17	0.235294
KRT6B	209126_x_at				0.988971	0.817742	0.584394	0.152215	0.395593	0.355151	0.0487974	0.0750259	0.0271225	0.0219136		0.192039	0.554358	0.0107632	0.306886	0.93585	0.77339	0.908475	4	17	0.235294
2012-03-11	239359_at				0.737738	0.968489	0.356142	0.614377	0.132109	0.688421	0.0391623	0.0137275		0.340353	0.0279826	0.903736	0.263806					0.274132	3	13	0.230769
2012-03-04	230112_at				0.307504	0.255499	0.261219	0.741684	0.011925	0.0309426	0.03266	0.150658		0.829725	0.939919	0.116899	0.207466					0.165224	3	13	0.230769
CAMSAP3	226494_at				0.650006	0.351684	0.454588	0.343971	0.233075	0.290045	0.234958	0.0325848		0.675074		0.0274376	0.189319		0.123535			0.0315254	3	13	0.230769
AARS	201000_at				0.0390756	0.0192099	0.582662	0.455448	0.454126	0.685635	0.182365	0.0775709	0.00491099	0.316968	0.415804	0.43694	0.0572998	0.348449	0.892375	0.037955	0.561359	0.791751	4	18	0.222222
ABCA2	210100_s_at				0.906342	0.948584	0.916383	0.385879	0.649662	0.491685	0.0132645	0.0786462	0.010105	0.911826	0.147031	0.167986	0.133639	0.0591878	0.711978	0.00673052	0.254679	0.0481615	4	18	0.222222
ABCC1	202804_at				0.216682	0.670007	0.745072	0.0762988	0.013838	0.891522	0.11495	0.25324	0.939018	0.280888	0.382629	0.0010608	0.0789463	0.27968	0.281287	0.00111115	0.332319	0.00180023	4	18	0.222222
ABCC5	209380_s_at				0.0695258	0.00507609	0.183535	0.972549	0.203862	0.664491	0.978596	0.356757	0.758513	0.915018	0.205684	0.00749768	0.0114243	0.0913293	0.555644	0.0134297	0.987828	0.219486	4	18	0.222222
ABCD1	205142_x_at				0.123857	0.0561922	0.895859	0.951217	0.59587	0.960572	0.344366	0.138777	0.00515673	0.938487	0.394823	0.269666	0.0421453	0.668196	0.0693605	0.392506	0.0395819	0.0310432	4	18	0.222222
ABCF2	209247_s_at				0.0847022	0.0490235	0.614031	0.318744	0.922183	0.391879	0.715852	0.634503	0.00768313	0.987779	0.411688	0.000411351	0.0208718	0.759853	0.501126	0.450402	0.748827	0.0544249	4	18	0.222222
ABHD5	218739_at				0.216948	0.901441	0.857621	0.703779	0.905772	0.909019	0.844096	0.495881	0.129966	0.540848	0.989652	0.000141341	0.334252	0.0278155	0.0418776	0.00122468	0.303818	0.477408	4	18	0.222222
ABI1	209027_s_at				0.865338	0.309341	0.937781	0.921075	0.746522	0.606772	0.176517	0.0406221	0.0095799	0.598642	0.340951	0.124527	0.0116406	0.185533	0.0206946	0.225472	0.325985	0.555362	4	18	0.222222
ABR	212895_s_at				0.695835	0.539719	0.0460808	0.799167	0.388362	0.850123	0.017878	0.149465	0.623922	0.898141	0.534756	0.900475	0.729595	0.0389557	0.507362	0.207568	0.143792	0.021	4	18	0.222222
AC003029.1	64432_at				0.617732	0.207018	0.756814	0.705615	0.189931	0.469776	0.588361	0.684791	0.00327141	0.0328138	0.47728	0.980565	0.888021	0.0586255	0.94366	0.000381435	0.556703	0.00969749	4	18	0.222222
AC004074.3	212773_s_at				0.0233579	0.569493	0.0256895	0.202084	0.125182	0.519551	0.350272	0.745185	0.0145911	0.390392	0.294765	0.492766	0.680801	0.172282	0.646431	0.000441373	0.83159	0.272194	4	18	0.222222
AC004797.1	201437_s_at				0.131486	0.644386	0.539784	0.880054	0.415321	0.666972	0.349514	0.114429	0.00315953	0.908834	0.117572	0.176257	0.236127	0.050652	0.0259081	0.00257809	0.274541	0.0486764	4	18	0.222222
AC005740.3	213129_s_at				0.68813	0.95378	0.150064	0.743922	0.338038	0.0831967	0.00193302	0.00687787	0.00301377	0.130544	0.13019	0.479517	0.489024	0.423985	0.000573274	0.577333	0.19899	0.585466	4	18	0.222222
AC009245.3	200034_s_at				0.967361	0.475809	0.0476207	0.363683	0.0505956	0.34702	0.637917	0.643528	0.00062214	0.207038	0.437514	0.954808	0.246519	0.315045	0.0423648	0.180967	0.99919	0.0222762	4	18	0.222222
AC009299.3	220427_at				0.483091	0.572244	0.159388	0.933976	0.0404906	0.339729	0.0185417	0.0399246	0.0785994	0.945492	0.190956	0.693276	0.4587	0.064221	0.438333	0.0213956	0.678068	0.674229	4	18	0.222222
AC012318.1	205644_s_at				0.145829	0.94565	0.224302	0.903519	0.147851	0.78348	0.730648	0.984397	0.0346008	0.616775	0.258055	0.407519	0.0403705	0.0535511	0.0069799	0.50652	0.580179	0.0220112	4	18	0.222222
AC012615.1	213244_at				0.400213	0.158762	0.49744	0.414452	0.148278	0.213337	0.462472	0.588827	0.0150914	0.534325	0.0323942	0.887523	0.26139	0.113796	0.869686	0.000403096	0.0415183	0.202553	4	18	0.222222
AC013461.1	218833_at				0.967836	0.890744	0.517971	0.0374627	0.79841	0.0524814	0.454262	0.531157	0.0970615	0.641484	0.190027	0.0383438	0.036939	0.230665	0.769169	0.027921	0.950073	0.124538	4	18	0.222222
AC016745.2	217378_x_at				0.598599	0.254588	0.370477	0.71251	0.778826	0.910208	0.00952273	0.00438419	0.0218068	0.862017	0.573245	0.766078	0.473027	0.00970664	0.126962	0.566985	0.511866	0.340025	4	18	0.222222
AC024575.1	64899_at				0.870768	0.399044	0.248327	0.58435	0.824895	0.773141	0.892754	0.549171	0.04565	0.273816	0.773418	0.0618597	0.127058	0.112716	0.0407413	0.773836	0.0103524	0.0121348	4	18	0.222222
AC026271.5	213754_s_at				0.063201	0.988586	0.0469674	0.230353	0.025583	0.184587	0.354798	0.848612	0.187128	0.641799	0.39758	0.266861	0.396549	0.781741	0.000232827	0.0107459	0.356802	0.292615	4	18	0.222222
AC074182.1	201381_x_at				0.737499	0.702805	0.0208865	0.652024	0.271163	0.646277	0.454338	0.161086	0.0144708	0.257821	0.111039	0.841271	0.878357	0.938029	0.00265288	0.14561	0.0936912	0.0225054	4	18	0.222222
AC084117.3	200650_s_at				0.128139	0.0455995	0.0237329	0.0268258	0.0628708	0.103171	0.0114713	0.0908764	0.446595	0.786469	0.0967278	0.830491	0.400613	0.677403	0.153653	0.216108	0.280195	0.297978	4	18	0.222222
AC091304.2	201492_s_at				0.0302771	0.774063	0.0034618	0.436457	0.0730935	0.289511	0.867847	0.986505	0.0208591	0.193009	0.437697	0.596494	0.429511	0.0686361	0.000203685	0.0746309	0.931011	0.236468	4	18	0.222222
AC093106.7	200705_s_at				0.463512	0.727736	0.0243518	0.175576	0.0418233	0.190597	0.526506	0.605616	0.00202477	0.31192	0.74524	0.867748	0.25378	0.368774	0.0234642	0.225911	0.62784	0.107224	4	18	0.222222
AC098817.5	216659_at				0.223972	0.352185	0.00063602	0.276482	0.000573898	0.0413911	0.545939	0.303567	0.260714	0.0164025	0.958868	0.0533036	0.25138	0.48134	0.719902	0.538863	0.844877	0.83621	4	18	0.222222
AC099668.5	216320_x_at				0.636461	0.923941	0.664798	0.457707	0.275998	0.262805	0.015324	0.0155002	0.300802	0.0553455	0.208048	0.982783	0.486941	0.281334	0.00219854	0.877413	0.397511	0.0357383	4	18	0.222222
AC108868.4	207979_s_at				0.460149	0.911314	0.528441	0.356701	0.6057	0.963055	0.0207893	0.00404179	0.0118076	0.439643	0.718573	0.294331	0.519428	0.322418	0.109506	0.467768	0.405251	0.029132	4	18	0.222222
AC138123.2	201492_s_at				0.0302771	0.774063	0.0034618	0.436457	0.0730935	0.289511	0.867847	0.986505	0.0208591	0.193009	0.437697	0.596494	0.429511	0.0686361	0.000203685	0.0746309	0.931011	0.236468	4	18	0.222222
ACADVL	200710_at				0.0441248	0.00969134	0.702722	0.754031	0.0663832	0.0833672	0.344059	0.447696	0.948246	0.768391	0.618111	0.741197	0.211138	0.583985	0.0432164	0.619193	0.0661502	0.00162461	4	18	0.222222
ACAT2	209608_s_at				0.908378	0.614599	0.410137	0.82537	0.619438	0.801214	0.246617	0.256484	0.107863	0.878683	0.0365895	0.974337	0.0881645	0.099651	0.00264181	0.0236851	0.549264	0.0370108	4	18	0.222222
ACBD3	202324_s_at				0.172065	0.481382	0.622251	0.832275	0.380488	0.984351	0.400865	0.129482	0.0140015	0.470819	0.553527	0.891765	0.020412	0.119147	0.0316751	0.344869	0.174198	0.0249055	4	18	0.222222
ACLY	201128_s_at				0.450025	0.950521	0.965229	0.499642	0.435285	0.248861	0.924501	0.504556	0.00932988	0.663501	0.297802	0.831927	0.0171841	0.00796455	0.0486504	0.202118	0.881546	0.0511369	4	18	0.222222
ACOT11	214763_at				0.132006	0.120639	0.0741338	0.0254512	0.794164	0.337373	0.943072	0.853774	0.00932407	0.268463	0.152457	0.0471115	0.530934	0.0245739	0.471399	0.351824	0.702743	0.221161	4	18	0.222222
ACR	207427_at				0.822238	0.595972	0.0196951	0.85916	0.00472799	0.482692	0.174016	0.631995	0.032927	0.412926	0.427069	0.617509	0.586563	0.827936	0.28878	0.00688045	0.815261	0.935066	4	18	0.222222
ACSL5	218322_s_at				0.681878	0.420476	0.378745	0.00699872	0.59887	0.248951	0.0646256	0.940425	0.273674	0.320363	0.0441937	0.331486	0.141037	0.0542034	0.814118	0.0124083	0.0353024	0.101365	4	18	0.222222
ACSM2A	214069_at				0.785439	0.646616	0.33146	0.380645	0.0301975	0.125295	0.405746	0.456588	0.0126565	0.883788	0.160752	0.0340365	0.0592347	0.429946	0.871312	0.832243	0.493842	0.0404214	4	18	0.222222
ACSM2B	214069_at				0.785439	0.646616	0.33146	0.380645	0.0301975	0.125295	0.405746	0.456588	0.0126565	0.883788	0.160752	0.0340365	0.0592347	0.429946	0.871312	0.832243	0.493842	0.0404214	4	18	0.222222
ACTG2	202274_at				0.637819	0.49299	0.265081	0.740684	0.692273	0.814976	0.0088149	0.0108232	0.028778	0.890313	0.844491	0.106312	0.195439	0.431294	0.316526	0.221602	0.302751	0.00352941	4	18	0.222222
ACTL6A	202666_s_at				0.180885	0.661852	0.00393268	0.0559064	0.228118	0.53422	0.159077	0.0953214	0.0222466	0.210054	0.240497	0.980901	0.3476	0.103944	0.00985735	0.490647	0.7053	0.0147409	4	18	0.222222
ACTL8	214957_at				0.128356	0.408202	0.116647	0.0642305	0.209269	0.0910764	0.206776	0.0487047	0.00182417	0.434648	0.795986	0.545605	0.048493	0.00933298	0.372232	0.518301	0.350817	0.176701	4	18	0.222222
ACTN1	211160_x_at				0.142783	0.225096	0.479184	0.639962	0.916274	0.975865	0.168034	0.0308808	0.813569	0.342865	0.311283	0.3255	0.0301951	0.198542	0.0305142	0.813826	0.895959	0.00393085	4	18	0.222222
ACTR2	200728_at				0.248959	0.165526	0.32405	0.452471	0.0496242	0.0330093	0.300995	0.496651	0.0335775	0.489786	0.702727	0.0705237	0.0701281	0.238341	0.0379669	0.0843084	0.40956	0.244631	4	18	0.222222
ACTR6	218395_at				0.699058	0.48846	0.304006	0.403094	0.967505	0.695446	0.0470369	0.0556807	0.0144845	0.389977	0.292093	0.903121	0.806228	0.0780565	0.00200956	0.413101	0.109544	0.0013365	4	18	0.222222
ACYP2	206833_s_at				0.00614029	0.141866	0.087563	0.539097	0.00521635	0.0388672	0.654973	0.544027	0.0192831	0.577176	0.431384	0.583727	0.0631869	0.744768	0.213134	0.31465	0.246847	0.359202	4	18	0.222222
ADAM10	202603_at				0.5572	0.643613	0.95541	0.580006	0.0768375	0.466972	0.553053	0.609882	0.0204713	0.683259	0.0426982	0.104069	0.0292846	0.10257	0.0105026	0.283098	0.209092	0.0543976	4	18	0.222222
ADAM19	209765_at				0.573596	0.561658	0.0124222	0.0356606	0.102883	0.717901	0.330397	0.935696	0.0253624	0.433747	0.336843	0.223513	0.0380272	0.49708	0.0759346	0.42003	0.744197	0.171765	4	18	0.222222
ADAM22	213411_at				0.764285	0.289342	0.273815	0.185213	0.480158	0.827481	0.161548	0.232322	0.623198	0.576444	0.615862	0.0305405	0.00199282	0.0538194	0.248476	0.00303618	0.00830135	0.193777	4	18	0.222222
ADAM23	206046_at				0.767537	0.0153586	0.115264	0.183382	0.709824	0.869716	0.0646365	0.382521	0.0174889	0.225567	0.970928	0.299503	0.902557	0.519134	0.011775	0.0316493	0.323738	0.121896	4	18	0.222222
ADAM29	221337_s_at				0.254867	0.492637	0.130664	0.908334	0.00618738	0.447021	0.79399	0.905506	0.0019674	0.636204	0.885055	0.89856	0.672783	0.170604	0.512596	0.0127056	0.966737	0.00468331	4	18	0.222222
ADAP1	90265_at				0.117221	0.111518	0.862022	0.27766	0.932758	0.243711	0.0333903	0.110089	0.01428	0.0334602	0.61728	0.000326746	0.968614	0.257274	0.330847	0.421724	0.318772	0.161831	4	18	0.222222
ADCY3	209320_at				0.456756	0.936041	0.4622	0.604172	0.516999	0.598382	0.34567	0.0236047	0.006805	0.208893	0.0720092	0.910203	0.0317618	0.301391	0.379782	0.801174	0.0136104	0.613255	4	18	0.222222
ADCY9	204498_s_at				0.243932	0.828891	0.00629765	0.178066	0.0032174	0.327736	0.798121	0.533418	0.0553338	0.0653712	0.179594	0.0494325	0.0623422	0.523727	0.325774	0.00622664	0.806873	0.0724268	4	18	0.222222
ADH7	210505_at				0.9405	0.108162	0.0153316	0.2041	0.28292	0.286453	0.621803	0.689256	0.000949035	0.205285	0.817521	0.0147516	0.502196	0.409389	0.0907091	0.0209811	0.0757288	0.17312	4	18	0.222222
ADO	212502_at				0.594392	0.495087	0.530495	0.204093	0.540471	0.695979	0.313147	0.475307	0.0035085	0.697323	0.668825	0.905404	0.844972	0.397135	0.0445162	0.00028991	0.292523	0.000582076	4	18	0.222222
ADORA3	206171_at				0.950439	0.562646	0.00617706	0.0119109	0.656923	0.270908	0.151414	0.683823	0.00497464	0.448378	0.20634	0.0486618	0.1671	0.344401	0.506286	0.426182	0.840641	0.485197	4	18	0.222222
AFTPH	217939_s_at				0.455196	0.161148	0.0154458	0.422407	0.0296863	0.534976	0.0411468	0.920402	0.124539	0.286455	0.666904	0.102969	0.107818	0.107152	0.170059	1.55e-10	0.50311	0.246109	4	18	0.222222
AGPAT5	218096_at				0.506481	0.486826	0.790847	0.567899	0.945488	0.454923	0.0648018	0.098293	0.0014379	0.681073	0.865413	0.218152	0.00421511	0.449039	0.369469	0.00839479	0.432675	0.0224766	4	18	0.222222
AGRN	217419_x_at				0.92382	0.890112	0.0412497	0.125537	0.179257	0.0880921	0.622814	0.899607	0.0137502	0.524373	0.210722	0.0379278	0.739025	0.535197	0.161872	0.0182698	0.076806	0.499415	4	18	0.222222
AHR	202820_at				0.469374	0.272517	0.415047	0.0236721	0.72551	0.0704317	0.775517	0.629362	0.612138	0.0399894	0.772699	0.126452	0.00969937	0.804682	0.0319241	0.733678	0.497648	0.65294	4	18	0.222222
AKAP11	203156_at				0.647348	0.80985	0.15528	0.153843	0.700113	0.113343	0.266358	0.364154	0.000547421	0.117515	0.0470169	0.603341	0.136731	0.0436552	0.0626826	0.117026	0.614202	0.0130492	4	18	0.222222
AKAP13	222024_s_at				0.0188354	0.0346667	0.639042	0.23984	0.392659	0.271806	0.59554	0.816183	0.000551975	0.542417	0.331386	0.80939	0.00916718	0.187821	0.348672	0.0559278	0.592843	0.261433	4	18	0.222222
AKAP4	207019_s_at				0.298597	0.00735302	0.725772	0.5431	0.184246	0.666274	0.41774	0.521679	0.00738504	0.671057	0.481692	0.554527	0.158061	0.00235659	0.0426916	0.0905735	0.967343	0.14946	4	18	0.222222
AKAP6	205359_at				0.27017	0.0436314	0.0427013	0.0190836	0.491755	0.345523	0.130258	0.378217	0.0538545	0.756418	0.663945	0.643026	0.117948	0.0337194	0.913515	0.661278	0.163673	0.158306	4	18	0.222222
AKAP9	210962_s_at				0.622906	0.262354	0.419139	0.345268	0.526766	0.981833	0.47881	0.307723	0.00561977	0.243555	0.832223	0.0575481	0.00341922	0.429404	0.537677	0.0113327	0.205638	0.00282753	4	18	0.222222
AKR1B1	201272_at				0.399793	0.0376046	0.270664	0.963578	0.185044	0.694135	0.266671	0.898598	0.00955883	0.763949	0.499358	0.045703	0.0429547	0.423685	0.194042	0.189778	0.431793	0.269153	4	18	0.222222
AKT3	212607_at				0.829539	0.790296	0.289721	0.0211656	0.358401	0.127617	0.84138	0.134779	0.0295076	0.586443	0.526524	0.667092	0.056725	0.175446	0.188095	0.000465623	0.0536662	0.0433151	4	18	0.222222
AL049757.3	213080_x_at				0.279661	0.643635	0.00472898	0.192271	0.0209366	0.176845	0.50305	0.844214	0.565248	0.298439	0.780624	0.710466	0.497514	0.459376	0.0154853	0.0811631	0.547267	0.0140679	4	18	0.222222
AL078621.13	207427_at				0.822238	0.595972	0.0196951	0.85916	0.00472799	0.482692	0.174016	0.631995	0.032927	0.412926	0.427069	0.617509	0.586563	0.827936	0.28878	0.00688045	0.815261	0.935066	4	18	0.222222
AL603926.1	204453_at				0.548403	0.745399	0.000832434	0.359058	0.0223971	0.731857	0.918178	0.183203	0.997177	0.310111	0.689624	0.922696	0.85194	0.160065	0.448391	0.00323236	0.152368	0.000382286	4	18	0.222222
AL603926.3	219595_at				0.795217	0.579471	0.0186204	0.0353752	0.138706	0.122515	0.721744	0.355974	0.425306	0.385359	0.392603	0.499772	0.217301	0.263368	0.300059	0.00890781	0.443733	0.0462845	4	18	0.222222
AL928654.7	205081_at				0.623156	0.480799	0.946679	0.268986	0.629197	0.243136	0.0242352	0.00608504	0.00127619	0.104815	0.889678	0.1832	0.718699	0.724645	0.458977	0.000501846	0.707383	0.708022	4	18	0.222222
ALDH1A3	203180_at				0.855215	0.564432	0.0286579	0.547322	0.0273754	0.668789	0.982891	0.180654	0.30432	0.414174	0.225915	0.012668	0.0177968	0.542238	0.0722008	0.128691	0.533421	0.393038	4	18	0.222222
ALDH3A2	202054_s_at				0.375585	0.808006	0.012985	0.109258	0.911464	0.636813	0.0671323	0.0489091	0.324987	0.737369	0.0445417	0.0664558	0.0515073	0.0606119	0.557969	0.0362082	0.381464	0.32273	4	18	0.222222
ALDH3B2	204941_s_at				0.0405274	0.334562	0.0588414	0.0763274	0.629996	0.233288	0.410781	0.0319851	0.0135492	0.589702	0.191527	0.27424	0.0583334	0.0964108	0.997856	0.211084	0.750539	0.0161751	4	18	0.222222
ALDOA	214687_x_at				0.498029	0.983357	0.00421017	0.068949	0.0359174	0.123956	0.105528	0.0655229	0.210212	0.807557	0.976013	0.980374	0.849786	0.230011	0.299615	0.0138546	0.738918	0.000913762	4	18	0.222222
ALG5	218203_at				0.764975	0.434088	0.0756352	0.547652	0.118838	0.715989	0.469091	0.444439	0.000618982	0.896429	0.0128338	0.0472338	0.416228	0.553145	0.0381768	0.630844	0.42432	0.168403	4	18	0.222222
ALG6	219649_at				0.379468	0.873815	0.728353	0.955197	0.2927	0.584706	0.865671	0.39799	0.0450943	0.563271	0.18537	0.642513	0.262505	0.0437179	0.204733	0.0204401	0.863153	0.00677247	4	18	0.222222
ALLC	220365_at				0.393463	0.445745	0.399296	0.990316	0.0268005	0.479355	0.379425	0.689878	0.0251909	0.0504293	0.883988	0.0216282	0.00217334	0.97843	0.838461	0.491602	0.435227	0.823401	4	18	0.222222
ALX4	208330_at				0.432437	0.865676	0.63922	0.520925	0.767663	0.413061	0.0156246	0.00723634	0.00240268	0.987263	0.77966	0.862748	0.0534455	0.0200064	0.681077	0.83838	0.0966052	0.971206	4	18	0.222222
AMIGO2	222108_at				0.845869	0.866102	0.47883	0.632311	0.679098	0.961927	0.498119	0.94393	0.963246	0.213856	0.149597	0.161237	0.00223029	0.10164	0.000738257	0.438628	0.0346685	0.00318915	4	18	0.222222
AMOT	209521_s_at				0.84036	0.487995	0.272995	0.378182	0.979423	0.319774	0.682829	0.201591	0.00724178	0.700538	0.73045	0.000865412	0.662563	0.0918145	0.0446598	0.0208246	0.832338	0.13997	4	18	0.222222
ANGPTL7	206423_at				0.966364	0.335084	0.114225	0.808425	0.0473612	0.722495	0.0663243	0.0420961	0.0475889	0.0323836	0.248606	0.385003	0.0522741	0.821389	0.394046	0.658758	0.161002	0.279942	4	18	0.222222
ANK2	202921_s_at				0.576754	0.486939	0.714852	0.0191233	0.915	0.0110658	0.839254	0.963423	0.0289657	0.891311	0.164955	0.0370611	0.0536635	0.366596	0.503045	0.84878	0.435068	0.492171	4	18	0.222222
ANK3	207950_s_at				0.00118196	0.00680654	0.388749	0.721733	0.45153	0.821225	0.153528	0.487823	0.00767017	0.616839	0.0664452	0.483566	0.115253	0.34362	0.831589	0.367133	0.0221437	0.966461	4	18	0.222222
ANKMY2	212798_s_at				0.194318	0.957186	0.00104719	0.0168237	0.0808844	0.129506	0.440223	0.237279	0.00454157	0.883468	0.206978	0.203692	0.35275	0.0738431	0.393714	0.408205	0.839479	0.00881333	4	18	0.222222
ANKRD49	219069_at				0.810199	0.229825	0.672039	0.292016	0.28457	0.11181	0.0938149	0.160532	0.00323423	0.830711	0.280674	0.609615	0.463737	0.0924009	0.00899744	0.0375649	0.538233	0.00644129	4	18	0.222222
ANO2	220111_s_at				0.111369	0.634642	0.69975	0.00707698	0.905799	0.0215712	0.539221	0.701488	0.00557493	0.180216	0.980824	0.0110378	0.622661	0.39696	0.116413	0.0589994	0.0591166	0.69965	4	18	0.222222
ANP32B	201305_x_at				0.991915	0.406823	0.0340422	0.584256	0.0103347	0.348845	0.794464	0.461309	0.287997	0.852956	0.288369	0.880967	0.380497	0.556175	0.00514509	0.000626829	0.444834	0.902992	4	18	0.222222
ANP32E	221505_at				0.145831	0.423885	0.916161	0.878392	0.745523	0.941558	0.547665	0.494866	0.00105721	0.382256	0.289762	0.459382	0.013298	0.143439	0.00289768	0.0108209	0.421244	0.0686803	4	18	0.222222
ANXA11	214783_s_at				0.804822	0.634374	0.0328432	0.383694	0.0483347	0.919774	0.503308	0.580245	0.204082	0.0289942	0.179079	0.436536	0.249732	0.0940482	0.143083	0.0350088	0.512164	0.568767	4	18	0.222222
ANXA9	210085_s_at				0.788812	0.283316	0.0209645	0.276019	0.00504071	0.306907	0.242949	0.17669	0.0758862	0.0146949	0.40518	0.409781	0.0936109	0.0751589	0.879595	0.993459	0.0638051	0.0174267	4	18	0.222222
AP001029.1	206273_at				0.532054	0.403111	0.523685	0.784344	0.0116664	0.032256	0.321947	0.083463	0.0371551	0.404919	0.969818	0.0899122	0.311803	0.449644	0.571221	0.00844637	0.748169	0.576252	4	18	0.222222
AP1S2	203300_x_at				0.0755705	0.164782	0.0149233	0.495192	0.0245581	0.384183	0.145683	0.366656	0.527148	0.926064	0.831018	0.355944	0.0364303	0.72434	0.0188086	0.994069	0.889668	0.889923	4	18	0.222222
AP2A2	215764_x_at				0.825587	0.159421	0.989107	0.217595	0.594624	0.371488	0.0146542	0.0196392	0.470468	0.616961	0.118556	0.00968334	0.0339726	0.293251	0.585087	0.707249	0.747335	0.467201	4	18	0.222222
AP3B1	203142_s_at				0.483534	0.114288	0.0914629	0.0346972	0.719806	0.530005	0.989212	0.842014	0.00452623	0.201714	0.124328	0.428943	0.01304	0.0739884	0.66417	9.68e-05	0.711047	0.159511	4	18	0.222222
AP5Z1	209912_s_at				0.356201	0.3637	0.983145	0.894989	0.688874	0.533077	0.024549	0.0869487	0.0246201	0.357389	0.410819	0.540209	0.874077	0.181143	0.725857	0.00656527	0.0388922	0.272566	4	18	0.222222
APAF1	211553_x_at				0.729868	0.632995	0.652039	0.0375833	0.39288	0.152876	0.331791	0.00703816	0.0245628	0.799892	0.12398	0.0716197	0.0464644	0.677085	0.378578	0.229448	0.122273	0.948932	4	18	0.222222
APLP2	214875_x_at				0.981788	0.869708	0.590556	0.647654	0.924799	0.753832	0.250198	0.475552	0.0428046	0.544909	0.698946	0.0205576	0.0114026	0.355961	0.92637	0.768879	0.280146	0.028217	4	18	0.222222
APOB	205108_s_at				0.979765	0.18445	0.470789	0.864696	0.109172	0.933293	0.513257	0.5607	0.012385	0.684774	0.227065	0.017105	0.18407	0.836813	0.0104115	0.408225	0.0353049	0.226205	4	18	0.222222
APOD	201525_at				0.382571	0.457177	0.125871	0.360405	0.183583	0.193285	0.00949848	0.0261857	0.0474288	0.669401	0.589985	0.433031	0.302245	0.0290531	0.630218	0.454992	0.100375	0.758922	4	18	0.222222
APOL5	220478_at				0.0891145	0.0380354	0.122684	0.872006	0.884308	0.40054	0.00448143	0.00439728	0.0104218	0.0940796	0.357584	0.310915	0.273548	0.468264	0.47041	0.0578806	0.853084	0.738188	4	18	0.222222
AQP5	213611_at				0.276431	0.653427	0.607498	0.222228	0.720874	0.918667	0.0393045	0.0754513	0.0137506	0.567539	0.294131	0.988808	0.316325	0.0241428	0.158133	0.482899	0.573989	0.0329175	4	18	0.222222
AQP9	205568_at				0.508827	0.435239	0.10951	0.0946266	0.555556	0.495645	0.332875	0.717976	0.0130063	0.407921	0.762718	0.0869902	0.0330652	0.235526	0.0427892	0.00192998	0.12594	0.194102	4	18	0.222222
AQR	212584_at				0.0541261	0.0177801	0.153636	0.271665	0.314688	0.449832	0.474376	0.403694	0.00705849	0.444873	0.310687	0.121904	0.0802822	0.103555	0.953002	0.000442701	0.0628393	0.0271504	4	18	0.222222
AR	211110_s_at				0.168566	0.0252458	0.868041	0.391093	0.0494936	0.820697	0.651661	0.308023	0.0233058	0.767334	0.791084	0.590807	0.0178781	0.050537	0.487989	0.782995	0.218629	0.808164	4	18	0.222222
ARF4	201097_s_at				0.370283	0.684624	0.432483	0.44691	0.123923	0.161324	0.827035	0.532881	0.00702231	0.291593	0.973886	0.0100671	0.00945857	0.612465	0.0496589	0.277392	0.366865	0.658242	4	18	0.222222
ARF5	201526_at				0.129984	0.524482	0.146563	0.535816	0.0270419	0.223791	0.640648	0.345763	0.0118098	0.226485	0.0231561	0.504522	0.532576	0.146792	0.956697	0.00283506	0.448557	0.0759309	4	18	0.222222
ARHGAP19	212738_at				0.195421	0.0946057	0.860903	0.510897	0.745134	0.581113	0.039519	0.0855095	0.0374651	0.318521	0.248148	0.0264971	0.00652792	0.0514034	0.0918579	0.923455	0.397235	0.566026	4	18	0.222222
ARHGAP29	203910_at				0.540596	0.969477	0.262012	0.0831678	0.391037	0.0958424	0.682857	0.630114	0.0257839	0.891691	0.372536	0.587937	0.0443706	0.11506	0.0331554	0.00279795	0.346415	0.324322	4	18	0.222222
ARHGAP4	204425_at				0.715302	0.134524	0.548045	0.915395	0.463719	0.48805	0.784485	0.74276	0.0177333	0.270882	0.515576	0.0214302	0.581619	0.169883	0.791034	0.00430899	0.0104076	0.0518927	4	18	0.222222
ARHGEF16	208009_s_at				0.502415	0.955815	0.546926	0.846928	0.245255	0.562244	0.0170372	0.00336352	0.0603227	0.109105	0.646176	0.0214303	0.00101026	0.0709395	0.911457	0.276706	0.511068	0.177919	4	18	0.222222
ARHGEF6	209539_at				0.6595	0.320777	0.779767	0.882088	0.530596	0.75422	0.0403369	0.00640588	0.417966	0.206653	0.959431	0.109695	0.00434995	0.61015	0.593748	0.203444	0.439992	0.0368997	4	18	0.222222
ARHGEF9	203264_s_at				0.686903	0.727041	0.951381	0.942019	0.0733999	0.0396295	0.253637	0.319262	0.0544582	0.0361912	0.0449718	0.611041	0.676822	0.0704735	0.0384702	0.0508391	0.808295	0.152298	4	18	0.222222
ARL6IP4	44617_at				0.0932635	0.0238999	0.300287	0.949402	0.336652	0.497523	0.11024	0.0408496	0.0723622	0.822283	0.100556	0.572358	0.940027	0.0349773	0.298018	0.398923	0.0685426	0.0117991	4	18	0.222222
ARMC1	218185_s_at				0.826063	0.233575	0.75049	0.868435	0.104891	0.119251	0.0489301	0.139605	0.0106003	0.49367	0.507197	0.970487	0.19227	0.443536	0.0289378	0.230437	0.404363	0.00365868	4	18	0.222222
ARMC4	221077_at				0.826044	0.35912	0.995938	0.46055	0.858676	0.673393	0.482022	0.874522	0.0383596	0.324882	0.506514	0.00250397	0.0469881	0.545962	0.524386	0.0105362	0.223939	0.142805	4	18	0.222222
ARPC4	217818_s_at				0.0057893	0.221423	0.147742	0.833681	0.0403644	0.151117	0.954765	0.27337	0.788716	0.912317	0.226393	0.344495	0.323359	0.121654	0.447767	0.00932563	0.732088	0.0207127	4	18	0.222222
ARRB2	203388_at				0.0957046	0.0248471	0.0376477	0.0675486	0.435568	0.623304	0.672477	0.11916	0.173201	0.663619	0.243692	0.595792	0.0469031	0.515933	0.289423	0.178276	0.0598172	0.0121208	4	18	0.222222
ASAH1	213702_x_at				0.113371	0.0660456	0.856348	0.740773	0.220206	0.118611	0.377519	0.160646	0.0449673	0.688631	0.400249	0.0163442	0.00312083	0.501846	0.0231703	0.784163	0.123846	0.475555	4	18	0.222222
ASTE1	221135_s_at				0.823556	0.318522	0.104862	0.330243	0.0370732	0.0535343	0.575331	0.964123	0.0265955	0.134642	0.437779	0.715916	0.43623	0.352108	0.713438	0.000123167	0.919766	0.000563468	4	18	0.222222
ATF5	204998_s_at				0.147792	0.0747037	0.00506478	0.0444589	0.161416	0.212989	0.731449	0.978374	0.0411572	0.245363	0.462904	0.391613	0.875454	0.291955	0.882941	0.269647	0.0360106	0.489172	4	18	0.222222
ATP1A2	203295_s_at				0.637276	0.805102	0.033422	0.435445	0.0394338	0.262216	0.207935	0.0493563	0.094254	0.797411	0.14631	0.459535	0.1562	0.119806	0.95384	0.045551	0.192226	0.266313	4	18	0.222222
ATP2A1	205444_at				0.145319	0.144769	0.224854	0.653687	0.565329	0.954354	0.00736006	0.016547	0.0101162	0.275933	0.614764	0.0033986	0.660395	0.356101	0.569508	0.0585347	0.386309	0.19839	4	18	0.222222
ATP2C1	212255_s_at				0.219573	0.872628	0.848742	0.44089	0.546501	0.742961	0.212983	0.0067237	0.872528	0.234297	0.748118	0.335559	0.384289	0.0290857	0.0363039	0.143534	0.389677	0.00530341	4	18	0.222222
ATP5D	213041_s_at				0.030679	0.910887	0.0417758	0.136542	0.0780162	0.410048	0.833065	0.608526	0.846409	0.478376	0.781096	0.634274	0.281717	0.295244	0.175583	0.000310288	0.636641	0.0218595	4	18	0.222222
ATP5G2	208764_s_at				0.00557134	0.73636	0.33464	0.93277	0.292521	0.821441	0.330766	0.187367	0.032968	0.281567	0.0226447	0.353662	0.470772	0.333829	0.561032	1.19e-06	0.374645	0.452387	4	18	0.222222
ATP5L	208745_at				0.13064	0.757192	0.905675	0.561748	0.499141	0.265263	0.00394542	0.0126197	0.0057789	0.139006	0.214698	0.158466	0.685411	0.0739043	0.0133261	0.915872	0.162605	0.123516	4	18	0.222222
ATP6AP1	207809_s_at				0.051356	0.535302	0.224682	0.567811	0.0229881	0.617635	0.465729	0.397661	0.0109071	0.989811	0.0732951	0.188827	0.129139	0.429853	0.644166	0.0068777	0.265894	0.000960099	4	18	0.222222
ATP6V0A1	205095_s_at				0.00362683	0.0232849	0.374566	0.105302	0.470971	0.118397	0.235405	0.319084	0.040452	0.304141	0.207078	0.295207	0.349339	0.0861323	0.231687	0.0940271	0.0199312	0.157143	4	18	0.222222
ATP6V0D1	212041_at				0.734139	0.201576	0.0841397	0.648283	0.190562	0.643527	0.444532	0.125739	0.0187433	0.598507	0.351836	0.0468171	0.0474332	0.0945992	0.643511	0.672493	0.964101	0.000843765	4	18	0.222222
ATP6V0E1P2	215576_at				0.68015	0.128823	0.00989803	0.00410013	0.0640758	0.181565	0.786869	0.533823	0.0194029	0.79885	0.770637	0.0394098	0.173443	0.116488	0.939428	0.133734	0.125311	0.242874	4	18	0.222222
ATP6V1C1	202874_s_at				0.77022	0.258751	0.103448	0.0145943	0.846435	0.585265	0.466541	0.562984	0.0137105	0.3388	0.187131	0.958593	0.111036	0.164415	0.0486445	0.0349984	0.13061	0.181962	4	18	0.222222
ATP8A1	213106_at				0.389926	0.197637	0.731929	0.802344	0.0410667	0.0373494	0.0707019	0.306626	0.213776	0.510396	0.613544	0.872401	0.42963	0.0150896	0.241212	0.921148	0.657384	0.0199795	4	18	0.222222
ATP8A2	219660_s_at				0.0121566	0.0453117	0.970198	0.576388	0.951054	0.323181	0.968568	0.728801	0.109348	0.10134	0.116281	0.0497647	0.0336792	0.559551	0.677607	0.510425	0.234283	0.750063	4	18	0.222222
ATPAF2	213057_at				0.444698	0.557729	0.0285884	0.0999299	0.0318322	0.087805	0.129335	0.558871	0.555669	0.448011	0.468965	0.477243	0.587483	0.240319	0.62404	0.0200626	0.020017	0.617768	4	18	0.222222
ATRN	212517_at				0.665206	0.224519	0.922535	0.888142	0.193595	0.322175	0.109179	0.159913	0.0532845	0.404698	0.0831318	0.032825	0.0117735	0.0916279	0.647129	0.00166776	0.91814	0.0405431	4	18	0.222222
ATRNL1	213744_at				0.314292	0.0235021	0.882352	0.877383	0.767698	0.936603	0.0507643	0.012758	0.425781	0.0491952	0.908195	0.668167	0.0246496	0.754269	0.67277	0.219232	0.136377	0.0965485	4	18	0.222222
ATRX	208859_s_at				0.0127775	0.924064	0.267561	0.669474	0.222728	0.648645	0.277604	0.620654	0.94919	0.803958	0.0223511	0.803964	0.00280592	0.183556	0.526025	0.656043	0.914889	0.0262043	4	18	0.222222
AZIN1	212461_at				0.182399	0.228329	0.768174	0.498822	0.969697	0.880347	0.990287	0.729727	0.0016445	0.266891	0.50586	0.8779	0.0445395	0.167755	0.0286246	0.298246	0.00999166	0.4229	4	18	0.222222
B9D1	210535_at				0.73883	0.997392	0.0370023	0.362047	0.0551715	0.811593	0.0446283	0.0145903	0.532403	0.838986	0.341134	0.399814	0.347475	0.0250154	0.428254	0.0715371	0.723302	0.35314	4	18	0.222222
BAG4	219624_at				0.469239	0.996219	0.419151	0.456735	0.803814	0.44823	0.0340254	0.183262	0.145269	0.396809	0.447135	0.13954	0.046301	0.655506	0.0627714	0.0390923	0.0404512	0.941678	4	18	0.222222
BAIAP2	205294_at				0.729038	0.00700425	0.149195	0.867907	0.0328627	0.590439	0.988846	0.758969	0.119964	0.497646	0.855825	0.0124336	0.950687	0.51997	0.0432096	0.389481	0.80464	0.412694	4	18	0.222222
BANK1	219667_s_at				0.505139	0.249399	0.673248	0.058068	0.872038	0.141488	0.514924	0.211393	0.0632351	0.296882	0.871464	0.628593	0.0482334	0.205547	0.0120902	0.022015	0.52044	0.0338083	4	18	0.222222
BASP1	202391_at				0.206687	0.0839909	0.82217	0.320761	0.890923	0.274708	0.350819	0.463378	0.606642	0.0864678	0.187868	0.0304525	0.0152299	0.761067	0.116608	0.0196908	0.400066	0.0401613	4	18	0.222222
BBS5	219106_s_at				0.0235545	0.0375421	0.404011	0.662848	0.0554642	0.100219	0.999016	0.916909	0.0463692	0.862747	0.364607	0.365274	0.00644614	0.881859	0.400497	0.307336	0.329096	0.513187	4	18	0.222222
BBS9	209958_s_at				0.0723698	0.325604	0.0174462	0.132657	0.0570718	0.413675	0.667667	0.312878	0.167765	0.0499261	0.0790305	0.371713	0.0962268	0.280186	0.630444	0.0469738	0.148524	0.0137378	4	18	0.222222
BCAP31	200837_at				0.755007	0.413721	0.0272839	0.662144	0.187347	0.729364	0.407392	0.199824	0.0280931	0.871493	0.551953	0.779703	0.509647	0.761497	0.958806	0.0268432	0.937495	0.0101812	4	18	0.222222
BCAS2	203053_at				0.479478	0.32917	0.0423032	0.562158	0.225903	0.776847	0.826216	0.603533	0.00544477	0.341255	0.464842	0.637984	0.991262	0.146377	0.0223115	0.023913	0.100448	0.147027	4	18	0.222222
BCKDHB	210653_s_at				0.783783	0.860601	0.287959	0.0347003	0.935007	0.230143	0.0030425	0.035292	0.0338344	0.936806	0.254243	0.381201	0.447974	0.117131	0.546022	0.0614056	0.0536362	0.581641	4	18	0.222222
BCL2L1	212312_at				0.554714	0.710878	0.0825842	0.0226706	0.103962	0.0512129	0.0276318	0.0753384	0.648083	0.572845	0.526229	0.651642	0.000918691	0.119246	0.31105	0.0819156	0.482893	0.0280337	4	18	0.222222
BCL2L14	221241_s_at				0.488793	0.574937	0.0350001	0.756882	0.0415024	0.844181	0.693417	0.802035	0.00935217	0.861583	0.807753	0.9111	0.522147	0.939017	0.776911	0.0013284	0.614786	0.823788	4	18	0.222222
BCOR	219433_at				0.839059	0.599871	0.0599559	0.076952	0.966637	0.780459	0.0365752	0.194317	0.030083	0.263106	0.886026	0.567938	0.462278	0.445024	0.303017	0.0299542	0.578702	0.00516242	4	18	0.222222
BDH1	211715_s_at				0.618507	0.86832	0.0591329	0.0741867	0.279999	0.302793	0.0414643	0.477021	0.0144279	0.770609	0.788328	0.00664071	0.0140284	0.980761	0.20789	0.980239	0.54887	0.686407	4	18	0.222222
BDH2	218285_s_at				0.619914	0.606468	0.0280739	0.372061	0.178774	0.649997	0.161287	0.0355452	0.745345	0.156186	0.89814	0.085454	0.0354385	0.0633514	0.915926	0.333121	0.350684	0.0148686	4	18	0.222222
BET1	202710_at				0.934937	0.435089	0.950686	0.262269	0.900412	0.688588	0.313952	0.0652378	0.000318945	0.0320709	0.315747	0.677276	0.56454	0.0551657	0.0246624	0.000118859	0.218785	0.118524	4	18	0.222222
BIN1	214643_x_at				0.369567	0.691927	0.0193262	0.288707	0.0312017	0.1897	0.935693	0.172557	0.0520511	0.789325	0.702894	0.553658	0.0450022	0.109949	0.417852	0.154603	0.0383033	0.199485	4	18	0.222222
BIRC2	202076_at				0.770443	0.375643	0.367111	0.612144	0.174493	0.327066	0.64605	0.334031	0.0416105	0.545854	0.175722	0.902775	0.270802	0.025965	0.366414	0.0147305	0.0934571	0.0239289	4	18	0.222222
BLM	205733_at				0.013752	0.762874	0.224754	0.320887	0.621935	0.517332	0.324891	0.295884	0.00156416	0.73804	0.73011	0.979721	0.128572	0.116894	0.67685	0.00323934	0.518983	0.0112911	4	18	0.222222
BMP1	202701_at				0.932583	0.272818	0.327236	0.0918751	0.538362	0.0400008	0.109823	0.969596	0.00370395	0.778838	0.0396055	0.400005	0.0249503	0.149532	0.0797689	0.243526	0.594264	0.457597	4	18	0.222222
BMP2K	59644_at				0.862961	0.558118	0.41015	0.424076	0.573038	0.532195	0.489731	0.454277	0.0458298	0.460103	0.187066	0.0284031	0.000516316	0.642005	0.663757	0.0195504	0.623301	0.692707	4	18	0.222222
BMP8B	207865_s_at				0.780288	0.544808	0.515177	0.0187116	0.0972689	0.0184922	0.695051	0.884676	0.042788	0.252519	0.0876295	0.710035	0.044166	0.247222	0.17813	0.0554887	0.526155	0.475443	4	18	0.222222
BNC1	206581_at				0.633093	0.105305	0.193486	0.252475	0.644974	0.0345459	0.799729	0.291607	0.0351414	0.0184124	0.250612	0.80229	0.262192	0.548591	0.165622	0.00077592	0.815313	0.980272	4	18	0.222222
BPGM	203502_at				0.253944	0.0924588	0.0224435	0.00946953	0.889958	0.846313	0.764841	0.207933	0.0329539	0.509746	0.093998	0.0194981	0.101567	0.158727	0.121335	0.482006	0.224034	0.171829	4	18	0.222222
BPTF	209271_at				0.728761	0.491202	0.57431	0.499998	0.908363	0.986587	0.650629	0.463627	0.0517079	0.036083	0.248796	0.308426	0.0280401	0.0651744	0.129203	0.031452	0.716406	0.0263255	4	18	0.222222
BRCA1	211851_x_at				0.810939	0.755105	0.84734	0.326928	0.198737	0.232075	0.00775388	0.00622508	0.0207579	0.972725	0.971572	0.583799	0.198903	0.00296482	0.918397	0.787064	0.170614	0.437968	4	18	0.222222
BRD7	221776_s_at				0.963192	0.549897	0.0263454	0.00025239	0.687518	0.0634496	0.542336	0.729328	0.0118084	0.81888	0.0833062	0.95041	0.640337	0.0366483	0.327034	0.873682	0.145126	0.645286	4	18	0.222222
BRIX1	219177_at				0.534918	0.117284	0.485347	0.0624397	0.71923	0.0242493	0.0047816	0.0308668	0.0635852	0.747007	0.153572	0.00980928	0.572117	0.247605	0.061668	0.467034	0.423459	0.219593	4	18	0.222222
BRWD1	219280_at				0.256194	0.344115	0.971214	0.532256	0.310351	0.704308	0.0307423	0.049507	0.0707628	0.841008	0.127221	0.246547	0.438581	0.226485	0.00770587	0.859346	0.0662384	0.0252073	4	18	0.222222
BTD	214117_s_at				0.0380983	0.535315	0.325968	0.1561	0.0128359	0.0724408	0.753545	0.845347	0.00336014	0.524293	0.309624	0.799648	0.407796	0.206375	0.0288374	0.836377	0.772577	0.0650228	4	18	0.222222
BTN2A1	215493_x_at				0.0572317	0.598174	0.658406	0.562449	0.325805	0.56813	0.0782076	0.0172101	0.00768184	0.644921	0.831628	0.0711273	0.538945	0.00670188	0.827777	9.68e-05	0.90192	0.827051	4	18	0.222222
BTRC	216091_s_at				0.364619	0.205908	0.825202	0.807599	0.982455	0.754155	0.0201345	0.0196991	0.0263082	0.338812	0.365186	0.0121405	0.739938	0.070365	0.504178	0.76985	0.547035	0.237714	4	18	0.222222
BX511012.2	217779_s_at				0.551152	0.656102	0.854761	0.468359	0.549747	0.552381	0.802631	0.6454	0.0125325	0.73857	0.60178	0.0241872	0.214184	0.24459	0.0207657	0.63876	0.0961392	7.13e-06	4	18	0.222222
BZW2	217809_at				0.73934	0.617318	0.180561	0.899865	0.0171401	0.279906	0.27714	0.158322	0.0135367	0.104658	0.560311	0.850531	0.731497	0.136029	0.24378	0.0227686	0.272588	0.0166614	4	18	0.222222
C10orf12	219601_s_at				0.687425	0.411635	0.00120505	0.0391707	0.021628	0.0866117	0.214663	0.889614	0.00900975	0.548279	0.955349	0.198087	0.0634011	0.69495	0.569937	0.281154	0.686641	0.56969	4	18	0.222222
C10orf2	218590_at				0.576224	0.971429	0.077085	0.371755	0.782056	0.816836	0.591513	0.46114	0.594777	0.88164	0.0584535	0.00357474	0.0193876	0.052725	0.983	0.000895445	0.502376	0.0323488	4	18	0.222222
C12orf4	218374_s_at				0.719382	0.377129	0.0382664	0.00756655	0.730026	0.0492589	0.310731	0.422426	0.0458378	0.802412	0.279974	0.748447	0.175264	0.194156	0.631151	0.0858018	0.112578	0.205294	4	18	0.222222
C12orf5	219099_at				0.759768	0.450158	0.58781	0.973507	0.0917619	0.00765012	0.731399	0.231825	0.00298667	0.150129	0.195483	0.000177208	0.0170685	0.667962	0.166138	0.919186	0.0617025	0.317344	4	18	0.222222
C12orf52	44065_at				0.33052	0.412395	0.742118	0.677772	0.812432	0.75092	0.227003	0.246759	0.123685	0.223192	0.0409368	0.593765	0.605263	0.0294501	0.0401957	0.185667	0.48602	0.0281346	4	18	0.222222
C14orf101	219757_s_at				0.436371	0.293436	0.350258	0.936504	0.0781042	0.423296	0.00722828	0.153506	0.163646	0.476668	0.12959	0.703753	0.00480558	0.183184	0.288954	0.000308452	0.591836	0.00185253	4	18	0.222222
C14orf132	218820_at				0.581622	0.476873	0.786865	0.263265	0.404204	0.600998	0.504567	0.638828	0.00883199	0.082167	0.626105	0.0447081	0.0396327	0.0295785	0.706497	0.514822	0.24224	0.646438	4	18	0.222222
C14orf43	218224_at				0.771919	0.333702	0.462709	0.846679	0.147422	0.279779	0.472277	0.980442	0.0084747	0.729084	0.219815	0.4584	0.0145189	0.467922	0.0143217	0.0250901	0.26872	0.832818	4	18	0.222222
C15orf29	218791_s_at				0.834245	0.520227	0.838762	0.65075	0.044951	0.478557	0.99751	0.424642	0.848242	0.393579	0.422048	0.613105	0.911582	0.0489435	0.0193626	7.21e-05	0.571073	0.12688	4	18	0.222222
C16orf88	213237_at				0.38873	0.825228	0.482438	0.816448	0.877581	0.35734	0.533804	0.629773	0.137969	0.342564	0.00770708	0.0212064	0.0563147	0.110986	0.153899	0.0305413	0.949614	0.00948641	4	18	0.222222
C17orf75	203830_at				0.128724	0.606438	0.733965	0.177245	0.237526	0.784904	0.0126094	0.029351	0.0135248	0.467055	0.615055	0.895462	0.635841	0.492755	0.0424473	0.535288	0.388224	0.252045	4	18	0.222222
C19orf60	51200_at				0.742456	0.180424	0.0291225	0.765827	0.0675186	0.830296	0.564866	0.29832	0.124129	0.415725	0.0476556	0.916813	0.692012	0.520789	0.284797	7.48e-06	0.376047	0.0384037	4	18	0.222222
C1GALT1C1	219283_at				0.580819	0.842818	0.66926	0.943074	0.343399	0.657396	0.978398	0.696293	0.00540664	0.49585	0.940787	0.0382857	0.0630115	0.0479243	0.0589303	0.0247812	0.259789	0.1663	4	18	0.222222
C1orf112	220840_s_at				0.00600726	0.502956	0.0709406	0.451379	0.627616	0.419219	0.0364681	0.592383	0.0140905	0.0652893	0.798039	0.159449	0.12595	0.038867	0.915272	0.412503	0.953814	0.862391	4	18	0.222222
C1orf144	212003_at				0.0411407	0.97794	0.0416636	0.892747	0.0246777	0.754738	0.332838	0.179609	0.832372	0.494961	0.518519	0.0160723	0.159239	0.0561056	0.80355	0.560906	0.611137	0.204708	4	18	0.222222
C1orf68	217087_at				0.468912	0.795776	0.13091	0.737094	0.637331	0.674528	0.00582832	0.0164069	0.0343022	0.425118	0.336166	0.930872	0.387909	0.0319665	0.0615468	0.881645	0.33636	0.058318	4	18	0.222222
C1orf9	203429_s_at				0.893017	0.863366	0.764601	0.409767	0.341104	0.400842	0.194637	0.293762	0.000491754	0.0369616	0.68494	0.768887	0.258076	0.000977326	0.0843669	0.724122	0.283272	0.0161578	4	18	0.222222
C1QA	218232_at				0.494523	0.0779226	0.087363	0.692599	0.13126	0.89916	0.0328502	0.0741192	0.0118711	0.961547	0.371872	0.00167693	0.00403407	0.157378	0.0741654	0.0703712	0.248937	0.101995	4	18	0.222222
C1QBP	214214_s_at				0.803264	0.325174	0.852554	0.93759	0.145074	0.262271	0.0112909	0.10011	0.00459377	0.737368	0.218398	0.121183	0.722913	0.211309	0.00676769	0.00220118	0.389111	0.235585	4	18	0.222222
C1S	208747_s_at				0.707138	0.210379	0.0140897	0.867343	0.0381567	0.807238	0.202771	0.480578	0.88098	0.725885	0.413646	0.00186364	0.000717499	0.889912	0.64128	0.135943	0.315923	0.938581	4	18	0.222222
C2	203052_at				0.784409	0.0975343	0.0129011	0.368908	0.639589	0.432242	0.0954209	0.254944	0.00694848	0.884083	0.453494	0.0194615	0.000612761	0.329793	0.247677	0.567877	0.447875	0.559937	4	18	0.222222
C22orf31	206839_at				0.708759	0.978535	0.025971	0.69241	0.00190767	0.103079	0.831554	0.528343	0.00193725	0.292932	0.0477648	0.6899	0.439807	0.347526	0.966671	0.956783	0.679901	0.187528	4	18	0.222222
C2orf42	219128_at				0.558246	0.209644	0.368923	0.791642	0.895349	0.95186	0.0719368	0.150871	0.609775	0.780997	0.69268	0.00536451	0.664416	0.0256061	0.941398	0.00200738	0.291598	0.0323321	4	18	0.222222
C3AR1	209906_at				0.511551	0.0728392	0.356884	0.188852	0.793388	0.650251	0.72399	0.805537	0.038633	0.627026	0.278368	0.00887211	0.0118972	0.309809	0.0593933	0.000695685	0.272278	0.919459	4	18	0.222222
C5orf30	221823_at				0.614311	0.955049	0.554377	0.794504	0.239334	0.574629	0.0283319	0.0705288	0.0278915	0.195403	0.327655	0.806582	0.00251763	0.140967	0.895511	1.93e-05	0.216506	0.378284	4	18	0.222222
C5orf44	218674_at				0.343736	0.547847	0.230613	0.778887	0.683235	0.360349	0.0167356	0.00834972	0.0111983	0.807258	0.264464	0.457838	0.230256	0.166862	0.0707073	0.665695	0.272301	0.034595	4	18	0.222222
C6orf165	203306_s_at				0.378629	0.33597	0.526501	0.815631	0.489645	0.95436	0.998867	0.444361	0.0139632	0.183698	0.229061	0.250285	0.0710129	0.0536782	0.0288012	0.040135	0.600953	0.00727729	4	18	0.222222
C6orf211	218195_at				0.613487	0.292028	0.496074	0.233659	0.925191	0.620487	0.0249742	0.049393	0.00277935	0.391224	0.141427	0.749041	0.731288	0.264938	0.0243381	0.741379	0.0548619	0.209703	4	18	0.222222
C6orf47	204968_at				0.492043	0.863919	0.899828	0.674397	0.614731	0.867307	0.960907	0.693834	0.00446971	0.556703	0.459389	0.49052	0.216477	0.0395401	0.286016	0.0119111	0.0384629	0.751097	4	18	0.222222
C7orf43	220659_s_at				0.243808	0.504954	0.343363	0.396017	0.0328086	0.696838	0.306638	0.847953	1.18e-05	0.0446571	0.812858	0.316788	0.304424	0.133165	0.036739	0.946471	0.985043	0.53469	4	18	0.222222
C8orf33	218187_s_at				0.851711	0.618534	0.199664	0.545778	0.335417	0.766792	0.00487923	0.280663	0.00367563	0.470395	0.782832	0.488159	0.0426339	0.413645	0.215686	0.000623791	0.188788	0.992499	4	18	0.222222
C9orf16	204480_s_at				0.964727	0.271631	0.0282389	0.32741	0.0178353	0.102129	0.5848	0.463538	0.436116	0.203901	0.707936	0.660763	0.280012	0.244086	0.390832	0.000155914	0.964543	0.0310696	4	18	0.222222
CACFD1	61874_at				0.26188	0.486227	0.0117649	0.362525	0.00773773	0.103435	0.56281	0.0104332	0.00346245	0.234507	0.346091	0.135728	0.709823	0.224476	0.0976115	0.0522412	0.180184	0.0690371	4	18	0.222222
CACNG4	221585_at				0.0728821	0.274638	0.502787	0.404452	0.30107	0.564999	0.114161	0.114137	0.0167799	0.0470866	0.846895	0.977139	0.166206	0.647898	0.534927	0.0430564	0.167276	0.0493762	4	18	0.222222
CACYBP	201381_x_at				0.737499	0.702805	0.0208865	0.652024	0.271163	0.646277	0.454338	0.161086	0.0144708	0.257821	0.111039	0.841271	0.878357	0.938029	0.00265288	0.14561	0.0936912	0.0225054	4	18	0.222222
CADM3	213948_x_at				0.222038	0.752411	0.763035	0.695355	0.937324	0.537274	0.00863262	0.0445878	0.0017963	0.0317741	0.658063	0.250513	0.366981	0.58656	0.306456	0.943871	0.662343	0.443786	4	18	0.222222
CALML5	220414_at				0.83923	0.967306	0.341067	0.123406	0.0143871	0.000490923	0.244723	0.382804	0.00640929	0.983852	0.717673	0.306675	0.00651484	0.385223	0.174566	0.0675177	0.842851	0.508043	4	18	0.222222
CAND1	208839_s_at				0.660099	0.193739	0.743207	0.137482	0.515895	0.181637	0.355646	0.157484	0.0491889	0.0536328	0.471872	0.910949	0.148236	0.783265	0.0797685	0.000198215	0.0448729	0.000570872	4	18	0.222222
CAPZA2	201238_s_at				0.148954	0.538094	0.75772	0.538053	0.271733	0.866525	0.509779	0.816388	0.00556354	0.797836	0.208771	0.0896342	0.0332467	0.396743	0.000717013	0.22131	0.0222328	0.623216	4	18	0.222222
CASKIN2	61297_at				0.265203	0.41334	0.531043	0.265481	0.34927	0.39733	0.0454886	0.0930914	0.00106335	0.45773	0.740617	0.666467	0.041321	0.0232532	0.288562	0.224249	0.799554	0.654394	4	18	0.222222
CASQ1	219645_at				0.627023	0.281765	0.195072	0.305993	0.15492	0.197267	0.0114527	0.0233434	0.0068594	0.135296	0.442056	0.970729	0.174021	0.169293	0.360257	0.00676059	0.517463	0.932837	4	18	0.222222
CAST	212586_at				0.784642	0.487954	0.327594	0.681458	0.325332	0.649411	0.795577	0.897528	0.0477076	0.738706	0.336605	0.369403	0.000325795	0.00608977	0.00485394	0.575499	0.0553883	0.174137	4	18	0.222222
CAV1	212097_at				0.866105	0.449507	0.781455	0.0573749	0.285191	0.0029166	0.733803	0.429855	0.258105	0.356346	0.0298775	0.586089	0.0285892	0.345302	0.00254906	0.370359	0.808469	0.737716	4	18	0.222222
CBFA2T3	208056_s_at				0.295974	0.00110719	0.00194967	0.0609959	0.0492922	0.291952	0.106556	0.251219	0.500252	0.375318	0.796369	0.411648	0.0225691	0.154298	0.268989	0.481237	0.18731	0.992357	4	18	0.222222
CCBL1	206037_at				0.548526	0.0498814	0.215276	0.0766792	0.155095	0.0433692	0.785713	0.853479	0.359329	0.577296	0.81085	0.629921	0.442253	0.296124	0.0287758	0.232021	0.0528079	0.047551	4	18	0.222222
CCDC102B	220301_at				0.240616	0.939063	0.647176	0.000415262	0.645596	0.00446141	0.659523	0.695548	0.547505	0.320304	0.655256	0.252696	0.0146627	0.169703	0.032607	0.503989	0.623172	0.461329	4	18	0.222222
CCDC132	207045_at				0.888495	0.419772	0.00765403	0.232956	0.114365	0.771428	0.536018	0.789871	0.0140842	0.0301333	0.0601637	0.941993	0.289521	0.566337	0.725996	0.0194372	0.691348	0.531011	4	18	0.222222
CCDC25	218125_s_at				0.94938	0.347208	0.0216727	0.557824	0.0759296	0.676389	0.848087	0.491849	0.890112	0.418697	0.583525	0.0116997	0.030098	0.0561863	0.736658	0.489398	0.25065	0.0278956	4	18	0.222222
CCDC47	217814_at				0.485268	0.90661	0.961068	0.769995	0.677253	0.515156	0.637088	0.347586	0.000349987	0.352442	0.187606	0.0871241	0.043936	0.107067	0.0352244	0.0139785	0.624978	0.0618827	4	18	0.222222
CCDC91	218545_at				0.261915	0.511898	0.115721	0.0777854	0.312361	0.654446	0.109541	0.0917952	0.0241574	0.585895	0.180731	0.836535	0.0457379	0.368583	0.0468417	0.905949	0.119004	0.00857817	4	18	0.222222
CCL14	210390_s_at				0.450456	0.47557	0.0138271	0.717058	0.737325	0.777356	0.0319904	0.201597	0.0149976	0.216099	0.140584	0.13803	0.485111	0.016123	0.408877	0.270142	0.173821	0.51853	4	18	0.222222
CCL15	210390_s_at				0.450456	0.47557	0.0138271	0.717058	0.737325	0.777356	0.0319904	0.201597	0.0149976	0.216099	0.140584	0.13803	0.485111	0.016123	0.408877	0.270142	0.173821	0.51853	4	18	0.222222
CCL19	210072_at				0.883872	0.700443	0.800214	0.781137	0.519747	0.257752	0.0784075	0.0279115	0.021105	0.147413	0.615901	0.692353	0.724599	0.725461	0.00640295	0.0355222	0.482988	0.265137	4	18	0.222222
CCND1	208712_at				0.740228	0.916789	0.0279064	0.557322	0.0159558	0.475854	0.16362	0.689662	0.168439	0.20869	0.289491	0.0813894	0.0157682	0.179206	0.0287637	0.867911	0.490728	0.223975	4	18	0.222222
CCR5	206991_s_at				0.14707	0.97247	0.623798	0.939769	0.305209	0.625103	0.884634	0.780112	0.00111177	0.900877	0.524794	0.0403703	0.211765	0.21388	0.0359654	0.0566043	0.693129	0.0192451	4	18	0.222222
CCZ1	201974_s_at				0.369442	0.643907	0.773581	0.687668	0.53714	0.561825	0.141747	0.00409549	0.0108948	0.30306	0.746551	0.363387	0.663809	0.520826	0.500993	0.725748	0.0493746	0.0332362	4	18	0.222222
CCZ1B	201974_s_at				0.369442	0.643907	0.773581	0.687668	0.53714	0.561825	0.141747	0.00409549	0.0108948	0.30306	0.746551	0.363387	0.663809	0.520826	0.500993	0.725748	0.0493746	0.0332362	4	18	0.222222
CD163L1	216233_at				0.983214	0.774821	0.729387	0.0221216	0.686388	0.772062	0.913923	0.843199	0.11693	0.791573	0.746882	0.0185377	0.00336983	0.471809	0.264999	0.0459969	0.404492	0.821649	4	18	0.222222
CD164	208405_s_at				0.392951	0.481437	0.625333	0.634646	0.692246	0.80038	0.275213	0.0920324	0.00190756	0.819294	0.723715	0.363294	0.0178213	0.837019	0.0420561	0.647402	0.091559	0.0444134	4	18	0.222222
CD2	205831_at				0.0176264	0.238469	0.454042	0.0514193	0.753834	0.157241	0.830623	0.485728	0.00217457	0.95655	0.0926635	0.0967371	0.120637	0.52342	0.208519	0.26878	0.0430795	0.0454557	4	18	0.222222
CD2BP2	202257_s_at				0.292642	0.583583	0.76542	0.224268	0.976821	0.259796	0.0261885	0.0475398	0.00926456	0.544399	0.475361	0.570519	0.205301	0.0036855	0.826122	0.209171	0.716735	0.1266	4	18	0.222222
CD3D	213539_at				0.108086	0.439616	0.826137	0.261712	0.184359	0.86437	0.23947	0.309132	0.00488956	0.578834	0.135351	0.0454298	0.940624	0.279867	0.0254346	0.87904	0.397907	0.046653	4	18	0.222222
CD7	214551_s_at				0.381524	0.0204201	0.246898	0.896902	0.494322	0.961241	0.124393	0.233	0.00231881	0.791851	0.00467145	0.353253	0.195871	0.0917319	0.805386	0.00413863	0.0763334	0.883688	4	18	0.222222
CD84	211191_at				0.437997	0.352901	0.134339	0.0924616	0.180658	0.405459	0.0266792	0.297923	0.0472177	0.681717	0.723037	0.02206	0.930834	0.332047	0.522827	0.0249894	0.511057	0.848204	4	18	0.222222
CD8B	215332_s_at				0.95016	0.178869	0.435478	0.00724036	0.57271	0.00762302	0.510794	0.183064	0.0720308	0.817383	0.0643506	0.327301	0.323073	0.408766	0.677878	0.0330391	0.726377	0.0310465	4	18	0.222222
CD9	201005_at				0.362465	0.222705	0.604205	0.260044	0.046081	0.722132	0.651528	0.0890175	0.031035	0.915849	0.864293	0.0180743	0.0397045	0.590456	0.499891	0.281991	0.524269	0.301703	4	18	0.222222
CDC14B	208022_s_at				0.0424495	0.0900579	0.0840256	0.499302	0.0312407	0.168987	0.576021	0.561758	0.624935	0.73873	0.260308	0.448618	0.00304806	0.0272047	0.856503	0.799716	0.234533	0.186683	4	18	0.222222
CDC25B	201853_s_at				0.248688	0.183176	0.154933	0.332149	0.0970676	0.396179	0.0396685	0.0397828	0.259631	0.852402	0.42235	0.00192487	0.0202784	0.805789	0.39275	0.306441	0.267678	0.104466	4	18	0.222222
CDC27	217879_at				0.326965	0.896165	0.715134	0.560529	0.194961	0.163978	0.0458626	0.0415286	0.123072	0.104156	0.138048	0.0888079	0.124478	0.468468	0.0525442	0.0104681	0.0737964	0.0265252	4	18	0.222222
CDC37	209953_s_at				0.142273	0.0178251	0.981751	0.763112	0.412275	0.544922	0.30753	0.12548	0.0728084	0.557587	0.373232	0.540077	0.216927	0.0454961	0.13843	0.00471043	0.944449	0.0289169	4	18	0.222222
CDC7	204510_at				0.746982	0.162074	0.151091	0.0103415	0.899325	0.142607	0.278763	0.515596	0.0101302	0.147529	0.394067	0.435986	0.151052	0.0682775	0.0705895	0.0296331	0.665328	0.000528898	4	18	0.222222
CDK10	203468_at				0.495678	0.0243065	0.634102	0.771066	0.631896	0.225189	0.177471	0.761461	0.012681	0.742796	0.449231	0.894547	0.676642	0.130696	0.744253	0.0264009	0.927758	0.0442228	4	18	0.222222
CDK3	207188_at				0.65311	0.73881	0.315021	0.338294	0.661237	0.949103	0.0232751	0.111615	0.00700311	0.590142	0.499369	0.990048	0.0772645	0.0991084	0.0474508	0.422994	0.178824	0.0411645	4	18	0.222222
CDK5RAP1	218315_s_at				0.111207	0.107314	0.0127693	0.152244	0.287155	0.59555	0.0922101	0.396679	0.280008	0.361397	0.188831	0.571551	0.0263313	0.186616	0.474715	0.0451245	0.498364	0.0472107	4	18	0.222222
CDK8	204831_at				0.961295	0.56102	0.0644477	0.415152	0.0134994	0.152255	0.0535057	0.134817	0.0180626	0.301316	0.243282	0.564061	0.115993	0.68844	0.0193852	0.134697	0.056409	0.000497439	4	18	0.222222
CDK9	203198_at				0.417339	0.620441	0.660454	0.872575	0.438941	0.279183	0.0478242	0.00906175	0.309898	0.380847	0.610606	0.287948	0.250449	0.017963	0.109657	0.000362038	0.229179	0.121885	4	18	0.222222
CDKN2AIP	218929_at				0.823248	0.534916	0.478822	0.173209	0.750052	0.73514	0.0305998	0.0209432	0.00567621	0.402384	0.735281	0.322855	0.175059	0.381395	0.469698	0.00789589	0.0961629	0.0699859	4	18	0.222222
CECR1	219505_at				0.225014	0.316832	0.925766	0.423766	0.80608	0.643319	0.469619	0.6342	0.586913	0.188575	0.750047	0.0244106	0.0219935	0.157928	0.0814984	0.000947455	0.0250133	0.181331	4	18	0.222222
CENPC1	204739_at				0.352114	0.964551	0.00194813	0.027979	0.607977	0.870562	0.344429	0.212891	0.000659693	0.609928	0.464142	0.260353	0.0526549	0.598037	0.0541884	0.692798	0.0575371	0.0147427	4	18	0.222222
CENPC1P1	204739_at				0.352114	0.964551	0.00194813	0.027979	0.607977	0.870562	0.344429	0.212891	0.000659693	0.609928	0.464142	0.260353	0.0526549	0.598037	0.0541884	0.692798	0.0575371	0.0147427	4	18	0.222222
CENPT	218148_at				0.216824	0.686826	0.288374	0.400381	0.584322	0.843566	0.0082561	0.00155274	0.226023	0.443368	0.0278479	0.570799	0.554368	0.457858	0.0615089	0.0309043	0.428269	0.11412	4	18	0.222222
CEP55	218542_at				0.647352	0.0107999	0.586091	0.478666	0.840498	0.673104	0.123304	0.27301	0.0159419	0.0308032	0.537465	0.1002	0.001009	0.791967	0.238387	0.659263	0.258163	0.693639	4	18	0.222222
CEP57	209862_s_at				0.964951	0.654495	0.349456	0.00105365	0.415555	0.0311608	0.572656	0.246927	0.442873	0.57108	0.169731	0.545267	0.0224316	0.44756	0.547139	0.17829	0.224652	0.015103	4	18	0.222222
CETN3	209662_at				0.66506	0.638364	0.778923	0.462096	0.615569	0.626236	0.0589604	0.0404623	0.00864317	0.235131	0.297162	0.315486	0.731994	0.33464	0.00393617	0.0652079	0.287141	0.00565475	4	18	0.222222
CFB	203052_at				0.784409	0.0975343	0.0129011	0.368908	0.639589	0.432242	0.0954209	0.254944	0.00694848	0.884083	0.453494	0.0194615	0.000612761	0.329793	0.247677	0.567877	0.447875	0.559937	4	18	0.222222
CHAD	206869_at				0.285294	0.355278	0.0176895	0.0765785	0.0152724	0.0416142	0.657161	0.380553	0.23634	0.808048	0.0763024	0.529378	0.0549705	0.759559	0.00265293	0.355101	0.965813	0.116619	4	18	0.222222
CHD7	220619_at				0.788653	0.227084	0.208628	0.87164	0.593817	0.801582	0.754099	0.77312	0.0117328	0.0438294	0.0254864	0.79894	0.434003	0.0114541	0.16589	0.624451	0.948504	0.407151	4	18	0.222222
CHD9	212616_at				0.159237	0.2499	0.485165	0.915991	0.323142	0.222732	0.0601163	0.0723323	0.141574	0.109816	0.241841	0.392026	0.177481	0.0313198	0.0342683	0.00976667	0.730186	0.013421	4	18	0.222222
CHN2	213385_at				0.406885	0.0316692	0.0936184	0.268417	0.643257	0.757575	0.362347	0.348704	0.496215	0.239759	0.037346	0.364627	0.201006	0.00909828	0.0205679	0.759222	0.387717	0.308824	4	18	0.222222
CHRDL1	209763_at				0.786313	0.774466	0.0141617	0.679783	0.0202263	0.819548	0.751314	0.231214	0.518899	0.690763	0.315135	0.130715	0.0216396	0.0542319	0.420209	0.00116073	0.0953828	0.871361	4	18	0.222222
CHRNA2	207868_at				0.274908	0.148519	0.097983	0.802988	0.0162024	0.580439	0.211148	0.00311015	0.00132252	0.808502	0.308205	0.666513	0.349823	0.248045	0.144885	0.29195	0.701306	0.0417668	4	18	0.222222
CHST15	203066_at				0.43797	0.811495	0.0800166	0.407268	0.354107	0.924172	0.392031	0.6092	0.632245	0.701698	0.662447	0.00677406	0.00394773	0.0552032	0.4186	0.00161357	0.0319363	0.216301	4	18	0.222222
CIAPIN1	208424_s_at				0.370761	0.947937	0.731974	0.155398	0.518943	0.119581	0.0499584	0.0456711	0.00238832	0.569861	0.0254714	0.0774762	0.793018	0.911332	0.215439	0.599313	0.228959	0.536497	4	18	0.222222
CKAP4	200999_s_at				0.376577	0.24812	0.0313484	0.250208	0.0322852	0.257186	0.829005	0.964759	0.54482	0.549091	0.714944	0.867612	0.652186	0.700212	0.378737	0.0182926	0.701111	0.0215143	4	18	0.222222
CLCN4	214769_at				0.921209	0.430585	0.994255	0.19619	0.29911	0.823439	0.786087	0.976841	0.0265017	0.280348	0.0299742	0.114592	0.135439	0.134019	0.0177094	0.007283	0.540748	0.90991	4	18	0.222222
CLIC1	208659_at				0.219644	0.387913	0.0994586	0.0356148	0.149902	0.133654	0.244529	0.503471	0.435419	0.0358463	0.873603	0.0890504	0.0401382	0.760966	0.581628	0.0153546	0.762132	0.0509326	4	18	0.222222
CLIC3	219529_at				0.24507	0.731516	0.169126	0.709997	0.0224515	0.0385705	0.99562	0.545046	0.088554	0.0568797	0.429182	0.697149	0.0945557	0.114285	0.042516	0.0392883	0.705903	0.270249	4	18	0.222222
CLIC4	201560_at				0.573635	0.479001	0.62361	0.049647	0.299854	0.0235983	0.498251	0.951507	0.0232491	0.756578	0.81599	0.661124	0.283047	0.572466	0.0641472	0.233699	0.0240644	0.0892386	4	18	0.222222
CLINT1	201769_at				0.374256	0.663045	0.811247	0.343751	0.765501	0.351534	0.263081	0.249525	0.00522689	0.0567349	0.0119659	0.00634491	0.114088	0.0439246	0.143286	0.361836	0.0892804	0.063174	4	18	0.222222
CLK3	202140_s_at				0.0189757	0.0323755	0.261418	0.380615	0.138496	0.107957	0.819095	0.639021	0.469621	0.724358	0.835517	0.889131	0.988313	0.0985049	0.264277	0.00172977	0.943443	0.00674686	4	18	0.222222
CLP1	204370_at				0.524358	0.217908	0.0817149	0.00122341	0.19728	0.0110727	0.799667	0.566318	0.00130616	0.696647	0.334337	0.329729	0.688351	0.313097	0.0490602	0.0787754	0.182803	0.223494	4	18	0.222222
CLPTM1	211136_s_at				0.0352372	0.15637	0.0112201	0.0200898	0.416511	0.248314	0.510888	0.305978	0.197195	0.448931	0.23995	0.660035	0.330278	0.105989	0.398368	0.00877077	0.432053	0.061789	4	18	0.222222
CLPX	204809_at				0.376938	0.120905	0.914334	0.682125	0.589789	0.990856	0.0107721	0.0174328	0.0172574	0.656068	0.294069	0.159325	0.0824383	0.491012	0.146442	0.0187408	0.169076	0.307685	4	18	0.222222
CLTB	205172_x_at				0.580429	0.743115	0.0449032	0.820799	0.0224946	0.777462	0.131074	0.0680668	0.961998	0.618805	0.761339	0.621958	0.177911	0.222005	0.267196	8.24e-06	0.659209	0.0414008	4	18	0.222222
CLU	208791_at				0.46981	0.608231	0.660263	0.397652	0.790466	0.405178	0.356611	0.0934899	0.0409593	0.641613	0.541494	0.0451467	0.0134307	0.0852338	0.14139	0.0391949	0.949529	0.124775	4	18	0.222222
CMPK1	217870_s_at				0.790395	0.578381	0.0947805	0.321759	0.0372175	0.238742	0.78299	0.629974	0.0448771	0.485341	0.123001	0.105331	0.186981	0.282194	0.215621	0.00699996	0.766498	0.0238728	4	18	0.222222
CNGA3	207261_at				0.0332818	0.199103	0.369709	0.741924	0.0490568	0.0384756	0.491543	0.442723	0.383733	0.341241	0.275036	0.0371673	0.500336	0.728494	0.355463	0.931833	0.533897	0.95525	4	18	0.222222
CNTN6	207195_at				0.646041	0.931002	0.710322	0.128456	0.952119	0.550573	0.349911	0.00108654	0.00748393	0.898631	0.262297	0.0104995	0.0276531	0.273418	0.266579	0.472626	0.213762	0.529687	4	18	0.222222
COL4A6	211473_s_at				0.176425	0.0422685	0.590341	0.734332	0.179674	0.406157	0.0387299	0.0211232	0.0315172	0.68591	0.155392	0.392581	0.443094	0.841782	0.441812	0.323155	0.972472	0.483768	4	18	0.222222
COX11	214277_at				0.356279	0.462694	0.219858	0.590531	0.683409	0.223405	0.0167276	0.0493566	0.0268374	0.716643	0.603635	0.657506	0.0917531	0.42317	0.0306395	0.0810228	0.193518	0.253292	4	18	0.222222
COX19	90265_at				0.117221	0.111518	0.862022	0.27766	0.932758	0.243711	0.0333903	0.110089	0.01428	0.0334602	0.61728	0.000326746	0.968614	0.257274	0.330847	0.421724	0.318772	0.161831	4	18	0.222222
COX6C	201754_at				0.349225	0.814678	0.098784	0.105103	0.0155706	0.0205422	0.575049	0.318463	0.0121672	0.445141	0.955863	0.667368	0.939749	0.0154104	0.174538	0.568098	0.618831	0.221248	4	18	0.222222
CPEB3	205773_at				0.293612	0.950241	0.492435	0.764769	0.567905	0.312764	0.0574071	0.0159873	0.14918	0.537985	0.0208815	0.108896	0.017448	0.75332	0.00196853	0.831357	0.288678	0.976076	4	18	0.222222
CPOX	204172_at				0.831124	0.379449	0.0684205	0.0892412	0.729663	0.963521	0.0021544	0.024371	0.0478374	0.457641	0.109662	0.98986	0.0626569	0.423028	0.52436	0.0719371	0.78529	0.00228855	4	18	0.222222
CPQ	208454_s_at				0.0287095	0.115748	0.893312	0.0430967	0.382777	0.328032	0.318865	0.237644	0.258365	0.106395	0.365218	0.13843	0.000134623	0.0607116	0.894031	0.114244	0.363637	0.0493071	4	18	0.222222
CPT2	204263_s_at				0.0108703	0.0206595	0.73241	0.13661	0.740849	0.789378	0.560186	0.810275	0.652511	0.54897	0.971539	0.289907	2.79e-05	0.0984721	0.265125	1.77e-05	0.760033	0.35096	4	18	0.222222
CRABP1	205350_at				0.572389	0.928421	0.446676	0.607445	0.264375	0.866696	0.921579	0.261687	0.0199897	0.985638	0.406569	0.0193073	0.357289	0.171948	0.0277916	0.92386	0.0209117	0.800374	4	18	0.222222
CREB3L2	212345_s_at				0.194093	0.795844	0.155573	0.492344	0.405617	0.876698	0.103195	0.0479279	0.00282717	0.231238	0.709166	0.522374	0.046431	0.923922	0.421159	0.464414	0.788118	0.0405081	4	18	0.222222
CRIP1	205081_at				0.623156	0.480799	0.946679	0.268986	0.629197	0.243136	0.0242352	0.00608504	0.00127619	0.104815	0.889678	0.1832	0.718699	0.724645	0.458977	0.000501846	0.707383	0.708022	4	18	0.222222
CRKL	212180_at				0.372465	0.335161	0.798574	0.190281	0.871207	0.329874	0.818772	0.738451	0.000520593	0.621975	0.0599626	0.0315033	0.184195	0.810385	0.272624	0.00426273	0.442537	0.0473032	4	18	0.222222
CRTAC1	221204_s_at				0.256913	0.133492	0.278908	0.622926	0.0763839	0.604292	0.0259174	0.0281474	0.000910644	0.999549	0.679578	0.347843	0.0485891	0.0728281	0.606565	0.286611	0.339157	0.823411	4	18	0.222222
CRYL1	220753_s_at				0.191156	0.318299	0.428483	0.819577	0.00860509	0.457869	0.434411	0.833891	0.0226253	0.86942	0.0849	0.159779	0.00793724	0.640907	0.827364	0.0322663	0.763776	0.632083	4	18	0.222222
CRYZL1	219767_s_at				0.758074	0.362344	0.129289	0.420636	0.698569	0.768495	0.0255513	0.0636801	0.0129098	0.15298	0.300144	0.490807	0.105808	0.0887447	0.0680565	0.514167	0.0438173	0.0171596	4	18	0.222222
CSDE1	202646_s_at				0.469707	0.114766	0.000656415	0.523433	0.000694792	0.123924	0.40095	0.668225	0.677845	0.929615	0.364144	0.125765	0.0219828	0.239758	0.901911	0.0488679	0.126529	0.568794	4	18	0.222222
CSNK1G2	202574_s_at				0.00744441	0.145845	0.0891879	0.1504	0.206722	0.341038	0.979601	0.872597	0.053154	0.817859	0.0201	0.209693	0.708	0.0396627	0.489078	4.86e-06	0.310009	0.0680005	4	18	0.222222
CST3	201360_at				0.0738453	0.696924	0.538628	0.756746	0.320114	0.186326	0.20337	0.13585	0.00264711	0.810932	0.229777	0.307339	0.0188049	0.35781	0.526433	0.0117084	0.434716	0.00167793	4	18	0.222222
CTA-204B4.6	213310_at				0.807781	0.981563	0.33475	0.494814	0.894253	0.815723	0.781394	0.632781	0.3174	0.279372	0.128479	0.61152	0.0298547	0.1603	0.106375	0.00304544	0.0245713	0.0121391	4	18	0.222222
CTC-203F4.1	220375_s_at				0.419464	0.505665	0.104398	0.883133	0.0211905	0.625078	0.588428	0.606662	3.42e-05	0.181374	0.363421	0.537271	0.141218	0.801258	0.0220889	0.27506	0.12873	0.0327197	4	18	0.222222
CTC-524C5.2	214214_s_at				0.803264	0.325174	0.852554	0.93759	0.145074	0.262271	0.0112909	0.10011	0.00459377	0.737368	0.218398	0.121183	0.722913	0.211309	0.00676769	0.00220118	0.389111	0.235585	4	18	0.222222
CTD-2031P19.4	201492_s_at				0.0302771	0.774063	0.0034618	0.436457	0.0730935	0.289511	0.867847	0.986505	0.0208591	0.193009	0.437697	0.596494	0.429511	0.0686361	0.000203685	0.0746309	0.931011	0.236468	4	18	0.222222
CTPS1	202613_at				0.352599	0.558285	0.50414	0.450789	0.452286	0.814701	0.754468	0.704131	0.0204847	0.924969	0.802079	0.0126528	0.0379905	0.158683	0.660741	0.249576	0.696144	0.000891551	4	18	0.222222
CTSB	213275_x_at				0.0960011	0.791093	0.0933939	0.327522	0.0433951	0.21474	0.10373	0.367055	0.0122974	0.660219	0.263869	0.0410111	0.0363352	0.987402	0.513993	0.259424	0.652597	0.280327	4	18	0.222222
CTSC	201487_at				0.476894	0.078978	0.706498	0.0701921	0.713647	0.0972098	0.879654	0.763381	0.00792873	0.928912	0.1095	0.00461088	0.0207659	0.705709	0.0181861	0.503148	0.211972	0.695295	4	18	0.222222
CTSK	202450_s_at				0.200549	0.00625803	0.00492034	0.54934	0.0285246	0.846002	0.347508	0.607478	0.283768	0.671946	0.620458	0.274642	0.00725378	0.0821213	0.347289	0.600351	0.175301	0.869868	4	18	0.222222
CTSO	203758_at				0.971098	0.43362	0.213857	0.555739	0.436531	0.82648	0.113184	0.0836908	0.00799291	0.310309	0.281356	0.025617	0.0349147	0.161715	0.924966	0.373887	0.44589	0.0328963	4	18	0.222222
CUL4B	202214_s_at				0.52587	0.320349	0.77921	0.190356	0.775366	0.574482	0.048076	0.0363821	0.0064533	0.181307	0.651317	0.957122	0.204957	0.0743609	0.0323762	0.131867	0.228768	0.0583013	4	18	0.222222
CUTC	218970_s_at				0.550637	0.334937	0.0286501	0.0253537	0.244316	0.632283	0.11234	0.137706	0.0050831	0.733116	0.327194	0.0528995	0.0170115	0.137012	0.823727	0.296276	0.817282	0.527884	4	18	0.222222
CXCR2	207008_at				0.997227	0.424818	0.251986	0.0536401	0.652094	0.556711	0.0449153	0.942535	0.0399312	0.21722	0.195506	0.230388	0.191855	0.884139	0.0172969	0.00567647	0.26518	0.695926	4	18	0.222222
CYBB	203923_s_at				0.675715	0.396524	0.00940807	0.182789	0.0872724	0.603108	0.551244	0.319055	0.0146787	0.883731	0.843098	0.0169713	0.00793031	0.764444	0.48097	0.183333	0.356092	0.635397	4	18	0.222222
CYorf17	221179_at				0.00790959	0.545604	0.293025	0.0171842	0.446238	0.103961	0.625782	0.311068	0.00858811	0.371291	0.0743374	0.128803	0.0263252	0.0607355	0.333459	0.287895	0.466152	0.579576	4	18	0.222222
CYP2F1	207913_at				0.691092	0.933575	0.0397519	0.659532	0.104338	0.802616	0.0436546	0.0872461	0.0349505	0.189817	0.66449	0.565515	0.0550631	0.793065	0.274784	0.0415792	0.217527	0.497443	4	18	0.222222
CYP2F1P	207913_at				0.691092	0.933575	0.0397519	0.659532	0.104338	0.802616	0.0436546	0.0872461	0.0349505	0.189817	0.66449	0.565515	0.0550631	0.793065	0.274784	0.0415792	0.217527	0.497443	4	18	0.222222
CYP4F3	206515_at				0.514359	0.331795	0.305034	0.00907008	0.302689	0.00763222	0.27184	0.0380774	0.974564	0.435753	0.597381	0.783803	0.061541	0.182667	0.817782	0.0185483	0.31922	0.583797	4	18	0.222222
CYSLTR2	220813_at				0.873783	0.479963	0.0172327	0.18004	0.0392971	0.459955	0.691162	0.349957	0.0204181	0.79174	0.0245391	0.252811	0.247517	0.479613	0.7563	0.0639777	0.927217	0.874579	4	18	0.222222
CYTH4	219183_s_at				0.359051	0.280505	0.0162163	0.152379	0.0504043	0.825624	0.695448	0.549515	0.0386885	0.203407	0.773899	0.000406543	0.0283205	0.0860242	0.742869	0.301423	0.319216	0.0746769	4	18	0.222222
DAP	201095_at				0.181817	0.489624	0.825815	0.220646	0.84942	0.276598	0.26375	0.000760025	0.000264777	0.494777	0.0404525	0.0574849	0.000399701	0.238801	0.452888	0.190982	0.940719	0.255776	4	18	0.222222
DARS2	218365_s_at				0.389425	0.449208	0.00037318	0.588791	0.000903076	0.408147	0.44418	0.910445	0.0127037	0.535154	0.486921	0.153917	0.357021	0.106348	0.640355	0.0117086	0.66225	0.263528	4	18	0.222222
DAZAP2	200794_x_at				0.484219	0.343272	0.245172	0.949912	0.181907	0.956089	0.177091	0.300362	0.0186992	0.404646	0.453467	0.0235109	0.0190569	0.584415	0.314845	0.00155426	0.0643431	0.885653	4	18	0.222222
DCAF17	220172_at				0.00660329	0.312338	0.713951	0.0844224	0.927716	0.898062	0.280738	0.612965	0.0113509	0.150934	0.194275	0.554498	0.983623	0.468535	0.665262	0.754222	0.00645794	0.0125912	4	18	0.222222
DCAF8	216885_s_at				0.602125	0.00938022	0.113584	0.830546	0.0441765	0.763969	0.883549	0.766933	0.245118	0.482764	0.950527	0.447867	0.0617753	0.412412	0.82664	0.00856528	0.430349	0.0476062	4	18	0.222222
DCLRE1C	222233_s_at				0.00671984	0.735073	0.0174866	0.181365	0.0544722	0.472777	0.52436	0.12517	0.00863948	0.148728	0.260889	0.563711	0.0248655	0.0688659	0.884886	0.848201	0.208794	0.119816	4	18	0.222222
DCN	211896_s_at				0.152218	0.0161961	0.208944	0.268078	0.127207	0.52182	0.458044	0.450212	0.044744	0.347775	0.931269	0.00965772	0.00957566	0.210119	0.250708	0.835302	0.0668931	0.953153	4	18	0.222222
DCTN6	203261_at				0.816177	0.393478	0.00600248	0.0427737	0.502684	0.516717	0.434297	0.422413	0.000481077	0.899135	0.613202	0.067195	0.977139	0.0176964	0.4091	0.189962	0.147195	0.734321	4	18	0.222222
DCUN1D1	218583_s_at				0.0818672	0.975771	0.859351	0.375213	0.603174	0.95201	0.775433	0.685021	0.178724	0.442951	0.0355747	0.995372	0.318248	0.0175959	0.0235856	0.00967004	0.0882989	0.061303	4	18	0.222222
DCUN1D4	212855_at				0.329244	0.874899	0.638485	0.522555	0.379788	0.461468	0.0704199	0.0233277	0.00918727	0.473403	0.201642	0.897307	0.00884649	0.0967093	0.0653337	0.700208	0.250195	0.0369766	4	18	0.222222
DDHD2	212690_at				0.685452	0.296273	0.483335	0.178176	0.84027	0.490035	0.581526	0.281222	0.00569888	0.8041	0.2047	0.0228999	0.141725	0.0195228	0.316617	0.48398	0.502874	0.0123372	4	18	0.222222
DDX1	201241_at				0.675331	0.116693	0.948753	0.610544	0.384914	0.503518	0.484105	0.696844	0.00259569	0.878216	0.0471097	0.827741	0.384311	0.131775	0.270472	0.00100151	0.0890376	0.00145433	4	18	0.222222
DDX19A	202578_s_at				0.0432073	0.0444212	0.242926	0.835099	0.284117	0.95567	0.297167	0.450343	0.207928	0.794076	0.753742	0.368666	0.376368	0.0405878	0.0410228	0.975101	0.817286	0.367055	4	18	0.222222
DDX46	202462_s_at				0.880271	0.196018	0.713822	0.581156	0.0510382	0.281029	0.987265	0.714187	0.000640701	0.911092	0.48107	0.978429	0.0390382	0.285328	0.997511	0.635974	0.041703	0.00643237	4	18	0.222222
DDX52	210320_s_at				0.990813	0.853089	0.0277303	0.00817642	0.223003	0.105265	0.323251	0.104617	0.0613135	0.457003	0.0579779	0.867342	0.308082	0.036862	0.171727	0.0517923	0.4989	0.00105425	4	18	0.222222
DEF8	219646_at				0.512225	0.0652914	0.115231	0.792676	0.00423346	0.328348	0.0593759	0.141379	0.00985321	0.981215	0.286326	0.921628	0.154251	0.0215798	0.918509	0.0111782	0.37185	0.146881	4	18	0.222222
DENND2A	221885_at				0.366902	0.321551	0.0408253	0.320126	0.819335	0.980828	0.284697	0.38043	0.00741995	0.957767	0.0848333	0.557239	0.400602	0.618516	0.2559	0.0345788	0.0153428	0.339785	4	18	0.222222
DERA	218102_at				0.94333	0.937531	0.366622	0.455628	0.239649	0.867121	0.013393	0.00863855	0.00910731	0.885253	0.558583	0.0323904	0.0667785	0.16608	0.117797	0.253141	0.162417	0.707813	4	18	0.222222
DES	214027_x_at				0.335171	0.615533	0.0130869	0.200226	0.028481	0.174878	0.0841426	0.0619612	0.0231752	0.397808	0.558528	0.870042	0.76379	0.0359597	0.155554	0.148534	0.616397	0.99447	4	18	0.222222
DFNB31	221887_s_at				0.174425	0.0345702	0.048855	0.359083	0.435826	0.26764	0.186802	0.0293347	0.0109868	0.773007	0.235208	0.412473	0.325791	0.547363	0.364777	0.821981	0.432972	0.118098	4	18	0.222222
DGCR2	202099_s_at				0.464619	0.566581	0.876008	0.730126	0.681595	0.225507	0.252765	0.225742	0.00650066	0.639953	0.0336221	0.584529	0.2983	0.0462513	0.578739	0.109253	0.441213	0.0086156	4	18	0.222222
DGCR6	208024_s_at				0.00607637	0.506153	0.468481	0.814195	0.120502	0.671035	0.275505	0.0189229	0.105013	0.600704	0.938282	0.961488	0.888388	0.350077	0.113993	0.000407925	0.978053	0.0261425	4	18	0.222222
DGCR6L	208024_s_at				0.00607637	0.506153	0.468481	0.814195	0.120502	0.671035	0.275505	0.0189229	0.105013	0.600704	0.938282	0.961488	0.888388	0.350077	0.113993	0.000407925	0.978053	0.0261425	4	18	0.222222
DGKD	208072_s_at				0.451267	0.617528	0.167268	0.659474	0.110516	0.885588	0.0100887	0.0125592	0.694557	0.234273	0.666165	0.429972	0.000844762	0.00381372	0.412946	0.939264	0.730545	0.375873	4	18	0.222222
DHRS9	219799_s_at				0.282381	0.813339	0.358957	0.893402	0.283722	0.33174	0.737951	0.213312	0.402121	0.141017	0.126718	0.00946473	0.00346593	0.0311761	0.40809	0.0888607	0.037721	0.493512	4	18	0.222222
DHX15	201386_s_at				0.357019	0.065313	0.577557	0.414437	0.464954	0.23602	0.9191	0.486904	0.00182089	0.603433	0.440011	0.930155	0.301773	0.0386284	0.922208	1.15e-05	0.667624	0.0378968	4	18	0.222222
DHX29	212648_at				0.811119	0.651827	0.388917	0.90575	0.240652	0.614837	0.404965	0.325721	0.000237309	0.916479	0.18171	0.591023	0.00359606	0.25824	0.00600884	0.330126	0.272263	0.00901176	4	18	0.222222
DHX32	218198_at				0.576868	0.724935	0.0210091	0.47614	0.412886	0.822057	0.0347997	0.00501042	0.0856421	0.527332	0.108784	0.615643	0.116837	0.287972	0.664342	2.43e-08	0.663632	0.839979	4	18	0.222222
DHX34	214017_s_at				0.12536	0.588085	0.262744	0.730957	0.0913479	0.0196537	0.321538	0.627042	0.00321326	0.614879	0.849068	0.478234	0.129123	0.0423596	0.263341	0.4212	0.0763687	0.00323187	4	18	0.222222
DHX38	209178_at				0.0867157	0.20932	0.202597	0.299967	0.485986	0.230145	0.0447598	0.0165656	0.553135	0.981945	0.383596	0.634708	0.28771	0.0061689	0.223479	0.736117	0.965577	0.0406008	4	18	0.222222
DISC1	206090_s_at				0.134602	0.101891	0.126839	0.344682	0.482494	0.756181	0.272776	0.151777	0.0215835	0.956822	0.44637	0.00716141	0.000981904	0.0440617	0.752321	0.116945	0.192391	0.927036	4	18	0.222222
DLEC1	206798_x_at				0.00849072	0.494724	0.662781	0.485198	0.0145073	0.694106	0.12361	0.108249	0.00854759	0.0409029	0.344285	0.652452	0.156365	0.452443	0.394929	0.301653	0.449704	0.293328	4	18	0.222222
DLEU1	205677_s_at				0.920611	0.621113	0.833648	0.0357415	0.318817	0.50396	0.901497	0.0935297	0.991772	0.862365	0.0111941	0.629922	0.466571	0.0455471	0.0726795	0.0414914	0.7323	0.213264	4	18	0.222222
DLEU2	215629_s_at				0.756755	0.173353	0.580859	0.848287	0.762678	0.351088	0.582415	0.804457	0.0219327	0.165797	0.970034	0.507325	0.0356802	0.547054	0.00473134	0.106656	0.241417	0.0394319	4	18	0.222222
DLEU2L	215629_s_at				0.756755	0.173353	0.580859	0.848287	0.762678	0.351088	0.582415	0.804457	0.0219327	0.165797	0.970034	0.507325	0.0356802	0.547054	0.00473134	0.106656	0.241417	0.0394319	4	18	0.222222
DLG1	202514_at				0.775648	0.267579	0.207572	0.265415	0.702741	0.838932	0.508075	0.42698	0.0115185	0.215244	0.0563779	0.625945	0.00467942	0.0298446	0.209889	0.432359	0.402754	0.032555	4	18	0.222222
DLG2	206253_at				0.00811837	0.644327	0.255199	0.934249	0.277488	0.700918	0.0722344	0.123116	0.0290936	0.0286283	0.694262	0.631998	0.222562	0.212778	0.062278	0.381814	0.0227009	0.339837	4	18	0.222222
DMC1	208386_x_at				0.0235554	0.0576208	0.065453	0.263681	0.0383002	0.124424	0.961049	0.930827	0.0189882	0.0288053	0.0669798	0.264621	0.554271	0.626936	0.765049	0.0511258	0.939789	0.783377	4	18	0.222222
DNA2	213647_at				0.0391312	0.776076	0.870406	0.0201162	0.492915	0.017354	0.393972	0.639079	0.135024	0.303955	0.910555	0.194355	0.161981	0.944346	0.129332	0.0226985	0.593948	0.0785913	4	18	0.222222
DNAH17	214229_at				0.240722	0.423641	0.705364	0.0371314	0.373159	0.654816	0.55116	0.462218	0.00359082	0.725027	0.80438	0.355246	0.0453541	0.576194	0.702416	0.523366	0.20192	0.0362324	4	18	0.222222
DNAJA2	209157_at				0.00669199	0.592424	0.86427	0.53286	0.653493	0.336136	0.00831326	0.171206	0.00522379	0.424308	0.305216	0.685568	0.227117	0.0558994	0.00465751	0.123338	0.0640345	0.50207	4	18	0.222222
DNAJC13	212467_at				0.880984	0.341729	0.00358044	0.723786	0.482023	0.612432	0.375627	0.146354	0.097408	0.737345	0.133132	0.00561397	0.0250317	0.0810862	0.00689975	0.295049	0.146797	0.904728	4	18	0.222222
DNAJC22	217288_at				0.23648	0.743058	0.0321827	0.0517447	0.0731962	0.0635388	0.306191	0.598629	0.0255585	0.27377	0.176931	0.112079	0.317529	0.423004	0.00844035	0.00466178	0.663361	0.496931	4	18	0.222222
DNAJC9	213088_s_at				0.90923	0.208429	0.0288729	0.20424	0.47725	0.786079	0.400798	0.333881	0.00688059	0.796263	0.214001	0.00719111	0.0501373	0.061724	0.571293	0.140451	0.33114	0.0273852	4	18	0.222222
DNASE1L2	207192_at				0.985921	0.892646	0.159918	0.153221	0.88363	0.849209	0.995373	0.688417	0.0327714	0.796176	0.945527	0.260902	0.0383859	0.0349951	0.527613	0.995542	0.03607	0.490626	4	18	0.222222
DOCK2	213160_at				0.805419	0.631431	0.418388	0.252077	0.983222	0.565211	0.0785598	0.127221	0.0775647	0.595571	0.642581	0.0140533	0.00319942	0.127504	0.0420604	0.511738	0.784627	0.037817	4	18	0.222222
DOK2	214054_at				0.446279	0.513222	0.775132	0.701338	0.157366	0.31777	0.426172	0.64764	0.0188199	0.099324	0.904742	0.0181212	0.543221	0.204117	0.666908	3.01e-05	0.0881242	0.0453036	4	18	0.222222
DPF3	219746_at				0.110746	0.743363	0.117179	0.287179	0.555339	0.973761	0.414431	0.69903	0.0330105	0.0173557	0.733117	0.75414	0.00595768	0.344116	0.0485295	0.234562	0.690686	0.245023	4	18	0.222222
DPYSL2	200762_at				0.34271	0.695774	0.271447	0.107477	0.0459188	0.027312	0.645507	0.560829	0.0374241	0.800418	0.322238	0.401442	0.12477	0.191207	0.00109391	0.119325	0.880027	0.835189	4	18	0.222222
DPYSL3	201430_s_at				0.366834	0.829118	0.12532	0.0427945	0.998176	0.958905	0.0493687	0.820722	0.445858	0.224342	0.986383	0.493433	0.747884	0.0390342	0.879543	0.0315572	0.46826	0.851144	4	18	0.222222
DRD2	216924_s_at				0.530234	0.329366	0.25723	0.976943	0.177663	0.475133	0.0515925	0.0197518	0.00504041	0.925813	0.0440451	0.262996	0.743885	0.034652	0.22882	0.750474	0.25276	0.243673	4	18	0.222222
DTX3	49051_g_at				0.831589	0.271381	0.836842	0.586257	0.057407	0.215161	0.0157089	0.00769018	0.090345	0.264986	0.31419	0.417645	0.134665	0.0181155	0.902331	0.011533	0.374033	0.917656	4	18	0.222222
DTX4	212611_at				0.652928	0.463421	0.046348	0.501839	0.0524237	0.546046	0.397087	0.150344	0.00248424	0.235718	0.043984	0.623659	0.370161	0.0897366	0.976819	0.0159727	0.117921	0.176913	4	18	0.222222
DUSP12	218576_s_at				0.397605	0.092749	0.138162	0.531563	0.493265	0.801555	0.0469324	0.0445871	0.00843989	0.248178	0.249377	0.300634	0.463888	0.25342	0.658986	0.0109181	0.529544	0.413555	4	18	0.222222
DUSP26	219144_at				0.616661	0.654912	0.0259778	0.478439	0.0484163	0.684017	0.568731	0.0491059	0.377339	0.305952	0.115821	0.655598	0.312338	0.0089369	0.953746	0.117016	0.540474	0.954348	4	18	0.222222
DUSP4	204015_s_at				0.148242	0.90237	0.196372	0.862398	0.0407374	0.521375	0.190585	0.570325	0.209705	0.615567	0.208284	0.0620258	0.0269286	0.931259	0.700009	0.0126452	0.630343	0.0446258	4	18	0.222222
DYRK2	202971_s_at				0.540886	0.676707	0.28497	0.857631	0.208179	0.50195	0.124766	0.423376	0.0648191	0.909465	0.0701564	0.0228117	0.000142932	0.19262	0.0141494	0.249746	0.636362	0.00610132	4	18	0.222222
DZANK1	219951_s_at				0.00873208	0.641182	0.478626	0.267023	0.334277	0.513251	0.607749	0.558782	0.906848	0.560664	0.282849	0.00728646	0.0203692	0.0309902	0.270357	0.699845	0.125931	0.111546	4	18	0.222222
E2F6	203957_at				0.627842	0.194559	0.0734368	0.0826265	0.94631	0.755996	0.086258	0.0448829	0.0142285	0.247373	0.359543	0.269105	0.172258	0.0575363	0.26577	0.0485291	0.871662	0.0116112	4	18	0.222222
EAF2	219551_at				0.0342852	0.234779	0.0701437	0.0318218	0.873899	0.852513	0.175902	0.866132	0.853974	0.138712	0.212103	0.637485	0.264498	0.0213967	0.43878	0.0498573	0.237427	0.503406	4	18	0.222222
EBAG9	204274_at				0.0124933	0.368105	0.121953	0.289074	0.212453	0.450349	0.49955	0.379457	0.0124125	0.173944	0.283235	0.948212	0.525433	0.172304	0.00363749	0.478553	0.157667	0.0184652	4	18	0.222222
EBNA1BP2	201323_at				0.58597	0.601516	0.716348	0.841691	0.823357	0.694216	0.594876	0.429051	0.0436437	0.357762	0.979786	0.100555	0.0475404	0.0454805	0.278642	0.881129	0.284182	0.0158914	4	18	0.222222
ECE1	201749_at				0.223684	0.957535	0.0240106	0.212946	0.0323861	0.794511	0.150487	0.10897	0.00611217	0.125878	0.191276	0.224677	0.656503	0.401884	0.239596	0.470174	0.505549	0.00710101	4	18	0.222222
ECEL1	219914_at				0.619542	0.934346	0.738688	0.904581	0.787444	0.334045	0.0138736	0.0335687	0.00845547	0.778059	0.779472	0.0560432	0.0636342	0.833906	0.183948	0.828568	0.525863	0.0444166	4	18	0.222222
ECM1	209365_s_at				0.0816659	0.0747264	0.0151713	0.527317	0.0143904	0.203988	0.111952	0.00943832	0.0406551	0.0575045	0.0767881	0.326248	0.792137	0.945924	0.210771	0.245839	0.916618	0.253124	4	18	0.222222
EDEM3	220926_s_at				0.937194	0.258382	0.181779	0.0321892	0.870131	0.578256	0.78399	0.473726	0.000180584	0.949511	0.140866	0.123836	0.0261377	0.0147089	0.0842072	0.568273	0.450473	0.241427	4	18	0.222222
EDNRB	204271_s_at				0.427385	0.917584	0.034515	0.0416858	0.088147	0.114961	0.988846	0.818747	0.900966	0.293834	0.33482	0.00511982	0.0905606	0.319456	0.0161902	0.182518	0.123431	0.899558	4	18	0.222222
EEA1	204840_s_at				0.0408709	0.688594	0.123263	0.655206	0.154656	0.494772	0.17696	0.473333	0.0889211	0.932209	0.0428771	0.527464	0.00645821	0.0380181	0.179249	0.199128	0.519867	0.817521	4	18	0.222222
EEF1B2	200705_s_at				0.463512	0.727736	0.0243518	0.175576	0.0418233	0.190597	0.526506	0.605616	0.00202477	0.31192	0.74524	0.867748	0.25378	0.368774	0.0234642	0.225911	0.62784	0.107224	4	18	0.222222
EEF1B2P2	200705_s_at				0.463512	0.727736	0.0243518	0.175576	0.0418233	0.190597	0.526506	0.605616	0.00202477	0.31192	0.74524	0.867748	0.25378	0.368774	0.0234642	0.225911	0.62784	0.107224	4	18	0.222222
EEF1B2P3	200705_s_at				0.463512	0.727736	0.0243518	0.175576	0.0418233	0.190597	0.526506	0.605616	0.00202477	0.31192	0.74524	0.867748	0.25378	0.368774	0.0234642	0.225911	0.62784	0.107224	4	18	0.222222
EEF1D	214394_x_at				0.770135	0.125829	0.00107664	0.213799	0.0348874	0.358871	0.918429	0.437976	0.00224238	0.229382	0.333136	0.551133	0.0736806	0.568067	0.987415	0.00169801	0.918372	0.226436	4	18	0.222222
EEF2	204102_s_at				0.245551	0.597839	0.104898	0.193716	0.0451398	0.0500816	0.555379	0.225863	0.0152273	0.194575	0.799444	0.590575	0.857466	0.0260288	0.720686	0.0217246	0.207369	0.577308	4	18	0.222222
EFNB2	202669_s_at				0.572152	0.614994	0.00632001	0.177108	0.0205136	0.280867	0.556333	0.485101	0.0725785	0.0195092	0.0122438	0.510435	0.252973	0.866655	0.652018	0.388049	0.682217	0.202948	4	18	0.222222
EFR3A	212150_at				0.738792	0.363292	0.380267	0.809103	0.489051	0.534548	0.318733	0.845756	0.0267215	0.493483	0.102578	0.147641	0.00891318	0.304791	0.011955	0.949159	0.107539	0.0144429	4	18	0.222222
EGFL8	209826_at				0.728432	0.578607	0.747439	0.0392241	0.752654	0.0175303	0.655688	0.649063	0.0186761	0.720706	0.228596	0.474079	0.573759	0.997873	0.0162576	0.511661	0.340453	0.88639	4	18	0.222222
EGFR	201984_s_at				0.280713	0.436618	0.181643	0.152902	0.213653	0.00167073	0.250564	0.985974	0.403115	0.0355432	0.462522	0.562109	0.0294567	0.118888	0.88023	0.152525	0.865506	0.00368385	4	18	0.222222
EHBP1	212653_s_at				0.946548	0.372692	0.574035	0.79618	0.684273	0.794738	0.733964	0.593814	0.0175706	0.334575	0.0820271	0.715316	0.687279	0.218081	0.0083996	0.0406308	0.662936	0.00133586	4	18	0.222222
EHD3	218935_at				0.271814	0.838046	0.0719997	0.00534876	0.856798	0.807596	0.989335	0.659895	0.0333638	0.421372	0.678979	0.0215458	0.0126318	0.641913	0.070109	0.621974	0.696543	0.328218	4	18	0.222222
EHD4	209536_s_at				0.508386	0.161655	0.376014	0.0855961	0.32748	0.105834	0.798211	0.433119	0.0514132	0.0725755	0.94749	0.0373091	0.0224169	0.064538	0.0100565	0.0325577	0.55491	0.803354	4	18	0.222222
EID1	211698_at				0.0829717	0.975093	0.224551	0.271085	0.047666	0.116866	0.34798	0.510155	0.00630893	0.404708	0.402658	0.92482	0.165503	0.439333	0.00661715	0.00926812	0.308031	0.425903	4	18	0.222222
EIF3M	202232_s_at				0.226372	0.652944	0.77946	0.627098	0.153591	0.185935	0.030252	0.102472	0.0119752	0.263949	0.989778	0.258959	0.985318	0.265996	0.0173116	0.0182353	0.116145	0.325036	4	18	0.222222
EIF4A1	211787_s_at				0.779226	0.949646	0.648098	0.752309	0.0259753	0.240345	0.645912	0.172866	0.0377403	0.761013	0.304855	0.258314	0.705484	0.895486	0.00891619	0.00204359	0.444143	0.987626	4	18	0.222222
EIF4A1P10	211787_s_at				0.779226	0.949646	0.648098	0.752309	0.0259753	0.240345	0.645912	0.172866	0.0377403	0.761013	0.304855	0.258314	0.705484	0.895486	0.00891619	0.00204359	0.444143	0.987626	4	18	0.222222
EIF4E	201437_s_at				0.131486	0.644386	0.539784	0.880054	0.415321	0.666972	0.349514	0.114429	0.00315953	0.908834	0.117572	0.176257	0.236127	0.050652	0.0259081	0.00257809	0.274541	0.0486764	4	18	0.222222
EIF4EBP1	221539_at				0.839119	0.71266	0.623618	0.762318	0.404118	0.917622	0.873369	0.773084	0.873612	0.422756	0.759037	0.0474704	0.00965408	0.903414	0.0724442	0.00805712	0.52617	0.0125494	4	18	0.222222
ELK4	206919_at				0.170752	0.114433	0.0556441	0.0363741	0.00456498	0.0138692	0.984956	0.739191	0.662932	0.620428	0.0794756	0.119797	0.598303	0.0728596	0.925394	0.0368824	0.2785	0.123789	4	18	0.222222
ELP4	203829_at				0.547318	0.460736	0.292162	0.106205	0.241603	0.0340416	0.142492	0.341427	0.0057413	0.360668	0.51407	0.966466	0.396386	0.842035	0.0811812	0.011044	0.0443579	0.153381	4	18	0.222222
EMC1	215991_s_at				0.045157	0.559395	0.640876	0.508696	0.232462	0.236372	0.508208	0.451488	0.00526182	0.202108	0.746991	0.133191	0.010715	0.203419	0.972477	0.0442854	0.881978	0.991642	4	18	0.222222
ENDOD1	212570_at				0.293365	0.723055	0.114414	0.273409	0.257764	0.559977	0.200235	0.704095	0.0417276	0.0197009	0.00692941	0.916203	0.671962	0.432682	0.0580963	0.160191	0.0310526	0.309413	4	18	0.222222
ENG	201809_s_at				0.58963	0.269745	0.550692	0.454798	0.553388	0.422003	0.00306772	0.0118084	0.00444208	0.179443	0.942986	0.786022	0.736838	0.323412	0.700762	0.001367	0.316723	0.563544	4	18	0.222222
ENOPH1	217956_s_at				0.586125	0.283191	0.81285	0.767903	0.744334	0.571756	0.0187707	0.0269316	0.00170167	0.791179	0.212156	0.450616	0.0832802	0.202117	0.00232969	0.616234	0.0926654	0.0614853	4	18	0.222222
ENOSF1	204142_at				0.382354	0.93692	0.336354	0.912968	0.800004	0.132316	0.862519	0.309401	0.750944	0.0131883	0.015821	0.24272	0.0331639	0.525884	0.968155	0.80399	0.498176	0.0218176	4	18	0.222222
ENOX2	204644_at				0.742788	0.787022	0.183972	0.487366	0.110286	0.848945	0.788123	0.847624	0.00732979	0.148551	0.94008	0.374775	0.187191	0.0353401	0.704781	0.0336142	0.766645	0.027876	4	18	0.222222
ENPEP	204844_at				0.260891	0.811293	0.0496089	0.520351	0.162719	0.839419	0.0379759	0.0883526	0.199709	0.549551	0.683438	0.140028	0.51558	0.156057	0.0312588	0.000365084	0.0569615	0.55719	4	18	0.222222
EPHB4	202894_at				0.788953	0.458094	0.885664	0.000675511	0.828593	0.014742	0.544832	0.534739	0.0127334	0.580716	0.313966	0.70128	0.366548	0.30237	0.0284881	0.295079	0.166425	0.22205	4	18	0.222222
EPRS	200843_s_at				0.304468	0.0835304	0.863089	0.0638154	0.353589	0.753737	0.339392	0.583145	0.000618644	0.286843	0.182582	0.470464	0.0488189	0.0304246	0.154996	0.0426686	0.223699	0.0585947	4	18	0.222222
EPS15	217887_s_at				0.62223	0.8678	0.240296	0.52862	0.522899	0.874979	0.511987	0.554697	0.0217575	0.696012	0.475061	0.606151	0.0476633	0.173092	0.000572188	0.0136772	0.302689	0.661565	4	18	0.222222
ERC1	215606_s_at				0.162787	0.386777	0.355906	0.147344	0.0754046	0.0384797	0.517492	0.599561	9.91e-05	0.271617	0.610394	0.92846	0.289838	0.275891	0.0274578	0.603062	0.864991	0.0287055	4	18	0.222222
ESR1	217163_at				0.305991	0.52072	0.326031	0.459204	0.0346286	0.0360363	0.716168	0.299007	0.000845477	0.0888589	0.0178402	0.246658	0.0759647	0.328188	0.436222	0.310146	0.876962	0.459227	4	18	0.222222
ETV5	203349_s_at				0.665346	0.234944	0.0768645	0.662618	0.0296477	0.86053	0.682121	0.328861	0.622149	0.683272	0.553478	0.0087706	0.0285789	0.495544	0.00956164	0.257817	0.238683	0.303423	4	18	0.222222
EVI2B	211742_s_at				0.828693	0.0446194	0.200914	0.0839947	0.340548	0.121945	0.124304	0.909767	0.232809	0.387196	0.160953	0.034738	0.000633756	0.0901249	0.0109232	0.267553	0.482675	0.810416	4	18	0.222222
EXOC2	219349_s_at				0.0458439	0.81981	0.78243	0.827215	0.34107	0.237257	0.993988	0.324169	0.00811204	0.458243	0.341973	0.864504	0.000363104	0.11021	0.0349362	0.0953328	0.769412	0.0956108	4	18	0.222222
EXTL2	209537_at				0.292113	0.626001	0.328432	0.434666	0.621135	0.539337	0.0896969	0.220047	0.0396643	0.0879803	0.396338	0.766476	0.0265783	0.0468192	0.515316	0.0191844	0.910307	0.0810227	4	18	0.222222
F2RL2	206795_at				0.180921	0.266357	0.0469211	0.105551	0.0716538	0.351634	0.749518	0.857078	0.0115482	0.206897	0.831864	0.0112794	0.117144	0.349339	0.285639	0.00346804	0.929287	0.111784	4	18	0.222222
F3	204363_at				0.364614	0.0980198	0.581304	0.508564	0.798903	0.342812	0.0977201	0.707557	0.99594	0.496936	0.785242	0.671009	0.0115236	0.342536	0.716391	0.040811	0.019527	0.0220071	4	18	0.222222
F8A1	203274_at				0.342657	0.0520935	0.0039494	0.0162788	0.0768438	0.273307	0.811002	0.911835	0.274794	0.362899	0.281723	0.440877	0.479025	0.87108	0.741158	0.0100917	0.769042	0.0122438	4	18	0.222222
F8A2	203274_at				0.342657	0.0520935	0.0039494	0.0162788	0.0768438	0.273307	0.811002	0.911835	0.274794	0.362899	0.281723	0.440877	0.479025	0.87108	0.741158	0.0100917	0.769042	0.0122438	4	18	0.222222
F8A3	203274_at				0.342657	0.0520935	0.0039494	0.0162788	0.0768438	0.273307	0.811002	0.911835	0.274794	0.362899	0.281723	0.440877	0.479025	0.87108	0.741158	0.0100917	0.769042	0.0122438	4	18	0.222222
FABP3	205738_s_at				0.154499	0.271504	0.358415	0.621693	0.0237185	0.0238646	0.286107	0.504217	0.0259728	0.0222534	0.530554	0.24098	0.582039	0.083347	0.575142	0.570797	0.85274	0.710997	4	18	0.222222
FAIM3	221601_s_at				0.176828	0.0319067	0.928144	0.718886	0.6161	0.720692	0.669207	0.308451	0.465283	0.267713	0.881294	0.0165604	0.871821	0.0456581	0.0162953	0.980682	0.719953	0.659762	4	18	0.222222
FAM115A	204403_x_at				0.319839	0.832605	0.0151864	0.256422	0.0103435	0.188472	0.587408	0.950644	0.000125544	0.994253	0.0288599	0.819701	0.532393	0.611805	0.72441	0.671219	0.225341	0.880335	4	18	0.222222
FAM115B	204403_x_at				0.319839	0.832605	0.0151864	0.256422	0.0103435	0.188472	0.587408	0.950644	0.000125544	0.994253	0.0288599	0.819701	0.532393	0.611805	0.72441	0.671219	0.225341	0.880335	4	18	0.222222
FAM124B	220637_at				0.714822	0.340125	0.0437863	0.00140046	0.585983	0.516651	0.960266	0.710754	0.0287141	0.573234	0.326735	0.425853	0.00064683	0.109613	0.876493	0.490375	0.989635	0.919055	4	18	0.222222
FAM129A	217966_s_at				0.505751	0.39575	0.0146633	0.176379	0.849824	0.837831	0.471531	0.964253	0.252837	0.177299	0.0742653	0.0495738	0.0108184	0.250771	0.101399	0.000965795	0.558669	0.861953	4	18	0.222222
FAM136A	215947_s_at				0.43967	0.659624	0.193793	0.454467	0.5851	0.115996	0.00698177	0.000235854	0.852216	0.208519	0.0284191	0.0570238	0.00298943	0.070183	0.146018	0.282572	0.204269	0.0655403	4	18	0.222222
FAM157B	211050_x_at				0.363167	0.0736345	0.206713	0.703228	0.0283105	0.22358	0.046371	0.336638	0.0388747	0.580512	0.154713	0.122362	0.0030429	0.539341	0.0535327	0.897714	0.35243	0.0522092	4	18	0.222222
FAM157C	211050_x_at				0.363167	0.0736345	0.206713	0.703228	0.0283105	0.22358	0.046371	0.336638	0.0388747	0.580512	0.154713	0.122362	0.0030429	0.539341	0.0535327	0.897714	0.35243	0.0522092	4	18	0.222222
FAM163A	222095_s_at				0.603442	0.832022	0.995196	0.906034	0.534194	0.458423	0.0257203	0.00208421	0.0703378	0.0127231	0.479056	0.0986854	0.677632	0.780621	0.529863	0.026875	0.28201	0.0833744	4	18	0.222222
FAM168A	212357_at				0.469479	0.449405	0.638339	0.0401833	0.396014	0.63588	0.695851	0.778072	0.928652	0.547482	0.878011	0.0300751	0.014265	0.0422141	0.249818	0.932986	0.346506	0.914073	4	18	0.222222
FAM176B	220134_x_at				0.392167	0.980691	0.135009	0.586241	0.0896815	0.861864	0.100371	0.668825	0.021339	0.0463544	0.496314	0.232713	0.00913205	0.189721	0.184265	0.0526581	0.72022	0.000939367	4	18	0.222222
FAM182A	216053_x_at				0.598948	0.0619917	0.369715	0.00252908	0.472785	0.0340745	0.844763	0.828843	0.00418704	0.740576	0.125552	0.48109	0.327713	0.235935	0.945496	0.0186568	0.324456	0.67297	4	18	0.222222
FAM182B	216053_x_at				0.598948	0.0619917	0.369715	0.00252908	0.472785	0.0340745	0.844763	0.828843	0.00418704	0.740576	0.125552	0.48109	0.327713	0.235935	0.945496	0.0186568	0.324456	0.67297	4	18	0.222222
FAM20B	202915_s_at				0.924689	0.551102	0.105697	0.189401	0.0131072	0.0396006	0.379553	0.397703	0.0797507	0.0802293	0.253088	0.133006	0.0303252	0.035311	0.613179	0.385553	0.111242	0.138274	4	18	0.222222
FAM47E	203986_at				0.227024	0.611327	0.319164	0.696288	0.649185	0.994441	0.0227587	0.146661	0.0129584	0.726859	0.450754	0.14979	0.145036	0.0193293	0.457042	0.000425197	0.845826	0.167823	4	18	0.222222
FAM50A	203262_s_at				0.828799	0.659477	0.0474193	0.792949	0.204758	0.886812	0.943457	0.974674	0.970227	0.381756	0.0106406	0.588882	0.00194425	0.451941	0.325504	0.0390312	0.775401	0.0503606	4	18	0.222222
FAM98A	212333_at				0.392909	0.889944	0.781005	0.615774	0.499286	0.156902	0.327134	0.305079	0.0183959	0.288881	0.389353	0.0653503	0.0236445	0.239549	0.179242	0.00165171	0.341694	0.00283087	4	18	0.222222
FANCE	220255_at				0.372236	0.851046	0.234967	0.0380074	0.23325	0.0318682	0.412581	0.768037	0.0150846	0.290326	0.292472	0.0303015	0.680807	0.242625	0.437205	0.416541	0.978649	0.136383	4	18	0.222222
FANCI	213008_at				0.23739	0.979463	0.280717	0.701119	0.46182	0.415917	0.0141121	0.102156	0.730156	0.0685671	0.693989	0.859506	0.0150307	0.0173042	0.0384062	0.268884	0.199195	0.24075	4	18	0.222222
FASN	212218_s_at				0.324815	0.35159	0.945351	0.0668919	0.223232	0.871804	0.818744	0.359348	0.410182	0.489751	0.167605	0.134109	0.0280277	0.674188	0.471915	0.0132809	0.0332635	0.0311387	4	18	0.222222
FASTK	202676_x_at				0.00680337	0.259745	0.00502481	0.110326	0.211607	0.365006	0.142106	0.314797	0.0926419	0.61813	0.846501	0.285403	0.300236	0.203703	0.0376858	0.00318324	0.0754655	0.099101	4	18	0.222222
FASTKD3	219200_at				0.485149	0.468993	0.398123	0.758993	0.411898	0.594596	0.00609607	0.0286002	0.0114656	0.527399	0.246271	0.914673	0.675655	0.112802	0.0392678	0.372524	0.638067	0.0632029	4	18	0.222222
FAU	200019_s_at				0.765779	0.657734	0.00215179	0.161158	0.0054111	0.269927	0.799122	0.623984	0.346721	0.243348	0.790296	0.700335	0.207935	0.403977	0.0372766	0.0347701	0.554243	0.290875	4	18	0.222222
FAUP1	200019_s_at				0.765779	0.657734	0.00215179	0.161158	0.0054111	0.269927	0.799122	0.623984	0.346721	0.243348	0.790296	0.700335	0.207935	0.403977	0.0372766	0.0347701	0.554243	0.290875	4	18	0.222222
FBLN5	203088_at				0.84358	0.0639775	0.176726	0.694585	0.545662	0.329799	0.13588	0.0334984	0.605104	0.468783	0.294509	0.0242974	0.00467032	0.130327	0.0996798	0.392986	0.587028	0.0498281	4	18	0.222222
FBN1	202765_s_at				0.0124783	0.0277376	0.0900644	0.740002	0.275768	0.969175	0.499111	0.2187	0.0200277	0.503717	0.358457	0.247869	0.00644951	0.425202	0.347519	0.253037	0.893939	0.644903	4	18	0.222222
FBXL5	209004_s_at				0.19012	0.198682	0.251308	0.27395	0.0438882	0.0483804	0.594161	0.409173	0.000212529	0.66517	0.109339	0.88367	0.116444	0.541761	0.0461933	0.84144	0.0514258	0.700557	4	18	0.222222
FBXW7	218751_s_at				0.073511	0.0288642	0.0181671	0.728814	0.113042	0.848844	0.751344	0.805409	0.802958	0.639652	0.707115	0.0363816	0.0239305	0.698906	0.90095	0.464606	0.129908	0.81321	4	18	0.222222
FCER1A	211734_s_at				0.389888	0.495025	0.445566	0.784177	0.759883	0.680423	0.0510477	0.0757181	0.00134369	0.456917	0.0377577	0.00634562	0.011441	0.660241	0.597655	0.453036	0.158195	0.917274	4	18	0.222222
FCGBP	203240_at				0.26917	0.669582	0.669976	0.679779	0.606963	0.271825	0.033305	0.0727189	0.0342526	0.69005	0.114845	0.0138808	0.0447235	0.150727	0.0851355	0.503431	0.621437	0.307927	4	18	0.222222
FCGRT	218831_s_at				0.0324456	0.316068	0.304837	0.831151	0.23103	0.788585	0.057482	0.085203	0.959826	0.789083	0.815659	0.0654182	0.0153232	0.195329	0.228068	0.593858	0.013571	0.000813358	4	18	0.222222
FECH	203116_s_at				0.959745	0.219397	0.100809	0.0979548	0.437349	0.408625	0.075781	0.0994479	0.0187913	0.208482	0.0340653	0.663367	0.02827	0.500696	0.356982	0.21802	0.50988	0.000701572	4	18	0.222222
FEM1B	212367_at				0.437868	0.833168	0.545634	0.740882	0.404357	0.640483	0.429636	0.203943	0.0334338	0.385713	0.287672	0.322395	0.570335	0.18716	0.00266577	0.0213215	0.84507	0.0213847	4	18	0.222222
FEN1	204767_s_at				0.738114	0.95441	0.96303	0.182848	0.697338	0.373962	0.971286	0.891884	0.359035	0.274989	0.227163	0.00738337	0.0022458	0.680108	0.0217588	0.508529	0.693138	0.00533672	4	18	0.222222
FERMT2	214212_x_at				0.105883	0.768495	0.00613097	0.263862	0.0301523	0.488952	0.618999	0.30956	0.637469	0.483329	0.037506	0.928092	0.579291	0.375478	0.596238	0.167287	0.792942	0.0213319	4	18	0.222222
FGF1	205117_at				0.985538	0.783019	0.372743	0.480998	0.919297	0.785144	0.784751	0.40107	0.00958398	0.229237	0.313197	0.0213325	0.00301781	0.716815	0.949252	0.0280809	0.082064	0.894872	4	18	0.222222
FGFR4	204579_at				0.0997971	0.666686	0.05195	0.882077	0.0480879	0.970476	0.0294792	0.0180876	0.118913	0.886861	0.620035	0.712664	0.340993	0.308654	0.355673	0.0447782	0.390876	0.0538279	4	18	0.222222
FH	203033_x_at				0.30642	0.337269	0.833203	0.873536	0.498146	0.321755	0.132957	0.0453581	0.0257721	0.872619	0.874893	0.344076	0.0270311	0.711364	0.222298	0.398995	0.216944	0.0127763	4	18	0.222222
FHP1	216349_at				0.0727035	0.188017	0.0570188	0.786718	0.986583	0.179876	0.00747154	0.00169233	0.0709681	0.8272	0.536722	0.872566	0.0111272	0.0169213	0.671522	0.993868	0.940411	0.426588	4	18	0.222222
FIS1	218034_at				0.212362	0.675861	0.0211823	0.805781	0.00708079	0.60845	0.567528	0.374532	0.0196466	0.89292	0.630066	0.899729	0.357816	0.263132	0.794479	0.0112854	0.885729	0.0777604	4	18	0.222222
FKBP14	219390_at				0.331367	0.363506	0.011282	0.150814	0.112654	0.302371	0.414803	0.640354	0.145934	0.804352	0.702245	0.0012708	0.00115252	0.899918	0.596131	0.198626	0.565422	7.25e-06	4	18	0.222222
FMNL1	204789_at				0.537801	0.267584	0.572249	0.457533	0.271049	0.828067	0.0384267	0.621074	0.00193276	0.0344012	0.582733	0.330841	0.779103	0.122006	0.515168	0.153264	0.349651	0.00361592	4	18	0.222222
FMO1	205666_at				0.440717	0.947111	0.580399	0.363343	0.481246	0.962183	0.929945	0.847462	0.0447561	0.0137879	0.61551	0.334359	0.0368329	0.244634	0.474838	0.0146144	0.287281	0.346903	4	18	0.222222
FOSL2	205409_at				0.656321	0.838965	0.104939	0.343087	0.512243	0.681825	0.0162768	0.0989615	0.104922	0.272557	0.47715	0.967221	0.0492827	0.0153537	0.933179	0.0390252	0.870182	0.36953	4	18	0.222222
FOXO3	204131_s_at				0.186256	0.00410968	0.0696132	0.0996723	0.535491	0.589876	0.44746	0.185227	0.0422879	0.33128	0.689908	0.855211	0.467834	0.0242834	0.62122	0.00256849	0.0738616	0.848409	4	18	0.222222
FPGT	205140_at				0.735457	0.822287	0.637442	0.532778	0.0417796	0.120954	0.522991	0.0719446	0.0229854	0.212333	0.36217	0.318991	0.293472	0.148374	0.0184985	0.00152306	0.069819	0.353663	4	18	0.222222
FPR3	214560_at				0.162036	0.108635	0.0709331	0.752466	0.696553	0.370793	0.590523	0.0185825	0.0342804	0.617312	0.190425	0.0391889	0.216355	0.215784	0.588731	0.0334235	0.197331	0.444277	4	18	0.222222
FRAT1	219889_at				0.813269	0.515034	0.182396	0.464551	0.182684	0.741423	0.014729	0.0527446	0.144252	0.992237	0.118074	0.17899	0.0280605	0.457428	0.163076	0.000413799	0.0935555	0.026198	4	18	0.222222
FRY	204072_s_at				0.139291	0.847189	0.792425	0.994758	0.909882	0.730933	0.353477	0.167722	0.00802832	0.545405	0.76138	0.15129	0.212023	0.0281716	0.011936	0.00963308	0.874332	0.378836	4	18	0.222222
FRYL	212546_s_at				0.213192	0.231711	0.527268	0.962271	0.14825	0.374889	0.0633832	0.160764	0.033939	0.705569	0.529301	0.888432	0.0820988	0.0223518	0.63781	0.000202234	0.572512	0.0289239	4	18	0.222222
FSCN3	201526_at				0.129984	0.524482	0.146563	0.535816	0.0270419	0.223791	0.640648	0.345763	0.0118098	0.226485	0.0231561	0.504522	0.532576	0.146792	0.956697	0.00283506	0.448557	0.0759309	4	18	0.222222
FTH1P11	200748_s_at				0.872502	0.469311	0.240223	0.739743	0.0622082	0.79006	0.123486	0.995058	0.0320552	0.60203	0.160171	0.0891758	0.027953	0.279269	0.646374	0.017958	0.88049	0.00470303	4	18	0.222222
FTH1P16	200748_s_at				0.872502	0.469311	0.240223	0.739743	0.0622082	0.79006	0.123486	0.995058	0.0320552	0.60203	0.160171	0.0891758	0.027953	0.279269	0.646374	0.017958	0.88049	0.00470303	4	18	0.222222
FTH1P20	200748_s_at				0.872502	0.469311	0.240223	0.739743	0.0622082	0.79006	0.123486	0.995058	0.0320552	0.60203	0.160171	0.0891758	0.027953	0.279269	0.646374	0.017958	0.88049	0.00470303	4	18	0.222222
FTH1P2	200748_s_at				0.872502	0.469311	0.240223	0.739743	0.0622082	0.79006	0.123486	0.995058	0.0320552	0.60203	0.160171	0.0891758	0.027953	0.279269	0.646374	0.017958	0.88049	0.00470303	4	18	0.222222
FUT4	209893_s_at				0.928056	0.878993	0.0266125	0.932629	0.0108998	0.509084	0.00380883	0.0163043	0.226005	0.462921	0.122557	0.722195	0.23274	0.362842	0.145092	0.829868	0.438939	0.86623	4	18	0.222222
FUT5	211225_at				0.463647	0.257473	0.0117192	0.115399	0.0430896	0.0125986	0.402932	0.889248	0.0107619	0.184727	0.081941	0.240491	0.402432	0.230412	0.765995	0.133626	0.822901	0.469868	4	18	0.222222
FXR1	201635_s_at				0.035424	0.254115	0.0367676	0.637261	0.0129044	0.422499	0.834274	0.33023	0.0346197	0.352953	0.708026	0.999313	0.453428	0.10543	0.341792	0.313627	0.407251	0.492089	4	18	0.222222
FYCO1	218204_s_at				0.626246	0.0286664	0.757791	0.965694	0.356842	0.704215	0.273724	0.946899	0.134858	0.449935	0.990082	0.689539	0.064972	0.0838961	0.000581366	0.00922093	0.328709	0.012324	4	18	0.222222
FZD3	219683_at				0.586749	0.983635	0.778394	0.986214	0.146686	0.39045	0.475803	0.430998	0.0246046	0.810486	0.513853	0.425232	0.166787	0.722748	0.28481	0.00179641	0.0246432	0.0116668	4	18	0.222222
FZD5	221245_s_at				0.226034	0.433733	0.0710119	0.00441	0.967402	0.773012	0.114376	0.28179	0.0079039	0.872209	0.354547	0.452131	0.00966721	0.0483492	0.991993	0.322192	0.705445	0.747528	4	18	0.222222
G3BP2	208840_s_at				0.481252	0.459763	0.59366	0.257086	0.106563	0.698554	0.430371	0.451136	0.0362336	0.924678	0.43538	0.0170893	0.00998026	0.735372	0.103694	0.000543827	0.269574	0.932863	4	18	0.222222
GABRA4	208463_at				0.641637	0.700025	0.0139867	0.130952	0.146852	0.491067	0.344711	0.17493	0.0465826	0.139605	0.67205	0.0248789	0.0124211	0.320807	0.293616	0.395631	0.501421	0.303456	4	18	0.222222
GALNT1	201724_s_at				0.937108	0.79945	0.0980782	0.560781	0.108575	0.471795	0.976529	0.414905	0.0412734	0.115233	0.698295	0.0292466	0.155622	0.0137878	0.353363	0.152342	0.0637815	0.00111689	4	18	0.222222
GART	212379_at				0.0772806	0.0287067	0.728564	0.918645	0.370421	0.748317	0.938897	0.653539	0.0294845	0.585791	0.688087	0.614729	0.0395293	0.877298	0.648148	0.000672341	0.482019	0.0773323	4	18	0.222222
GAS7	202192_s_at				0.0440938	0.712616	0.246044	0.37083	0.510729	0.283989	0.0178215	0.0323067	0.0417497	0.659248	0.191895	0.13353	0.971962	0.350502	0.481316	0.757069	0.497137	0.206085	4	18	0.222222
GATM	203178_at				0.37741	0.981536	0.33401	0.483841	0.257755	0.302382	0.493883	0.860618	0.925215	0.598087	0.847477	0.331011	0.0479807	0.328442	0.0184262	0.0280237	0.327106	0.0272998	4	18	0.222222
GCFC2	216305_s_at				0.72947	0.252392	0.540014	0.775321	0.0938539	0.0329292	0.529968	0.603686	0.012108	0.112021	0.0275965	0.310638	0.119428	0.0830797	0.562492	0.723171	0.677797	0.0170346	4	18	0.222222
GCH1	204224_s_at				0.485081	0.211515	0.228695	0.00768786	0.140436	0.0162211	0.048233	0.21698	0.0195218	0.0737036	0.487882	0.0686496	0.0908894	0.239207	0.623817	0.699316	0.141782	0.0657245	4	18	0.222222
GCKR	206867_at				0.401732	0.0041973	0.424732	0.730846	0.226782	0.626915	0.792094	0.9487	0.0124865	0.298508	0.380704	0.399542	0.126955	0.211349	0.137732	0.0319634	0.510623	0.0163788	4	18	0.222222
GCNT2	211020_at				0.557195	0.191348	0.522652	0.18289	0.729531	0.0264764	0.239067	0.504568	0.0288106	0.841345	0.36148	0.00662883	0.255285	0.2465	0.734454	0.0517099	0.783559	0.034086	4	18	0.222222
GCSH	213129_s_at				0.68813	0.95378	0.150064	0.743922	0.338038	0.0831967	0.00193302	0.00687787	0.00301377	0.130544	0.13019	0.479517	0.489024	0.423985	0.000573274	0.577333	0.19899	0.585466	4	18	0.222222
GEMIN6	219539_at				0.194162	0.399415	0.784229	0.272207	0.377516	0.0922496	0.419424	0.667655	0.559842	0.739427	0.0474814	0.0549842	0.944359	0.0950901	0.0443081	0.00216984	0.8061	0.0146341	4	18	0.222222
GFRA4	221199_at				0.125193	0.610858	0.0783913	0.310484	0.0150825	0.285636	0.233497	0.636062	0.0322154	0.515759	0.114482	0.0406562	0.0963209	0.414513	0.485331	0.687642	0.538315	0.00837726	4	18	0.222222
GH2	206195_x_at				0.0263817	0.546486	0.0590752	0.581995	0.0358216	0.970566	0.726943	0.710213	0.0175966	0.263063	0.338607	0.00805203	0.743171	0.12243	0.154424	0.467679	0.724474	0.603764	4	18	0.222222
GHR	205498_at				0.855493	0.779698	0.00687447	0.135525	0.372459	0.606087	0.295893	0.293362	0.227303	0.175044	0.286505	0.0287033	0.848525	0.555278	0.0127158	0.000964719	0.653771	0.767394	4	18	0.222222
GK	214681_at				0.414648	0.599179	0.127461	0.442335	0.512138	0.807	0.227876	0.374048	0.0347333	0.0310188	0.95413	0.0959372	0.0131438	0.671381	0.156369	0.0237053	0.747539	0.0604354	4	18	0.222222
GLCE	213552_at				0.840534	0.377838	0.833844	0.339549	0.439993	0.611347	0.0222845	0.15593	0.0111968	0.49622	0.02287	0.0534069	0.0609955	0.016958	0.485087	0.785149	0.470746	0.176333	4	18	0.222222
GLG1	214730_s_at				0.919066	0.157096	0.0618583	0.95753	0.24705	0.719785	0.584657	0.0958385	0.0165426	0.684157	0.0100018	0.640539	0.0162925	0.0365732	0.270571	0.886425	0.320818	0.502807	4	18	0.222222
GLI2	208057_s_at				0.665421	0.923478	0.995583	0.988493	0.966343	0.990795	0.00965328	0.054892	0.0142237	0.2092	0.313239	0.305069	0.198008	0.00340518	0.653064	0.164759	0.684858	0.029538	4	18	0.222222
GLRA1	207972_at				0.0282142	0.167325	0.00146293	0.112805	0.266534	0.881059	0.0384723	0.586791	0.0042608	0.189533	0.811361	0.348329	0.442681	0.921382	0.261746	0.454835	0.404852	0.671649	4	18	0.222222
GLS	203157_s_at				0.292656	0.539768	0.263177	0.568582	0.398096	0.686681	0.562551	0.0364646	0.391099	0.190879	0.976472	0.00597597	0.0308437	0.106703	0.670021	0.000852827	0.724496	0.770383	4	18	0.222222
GLT8D1	218146_at				0.923118	0.504294	0.850001	0.915944	0.966571	0.824817	0.0570878	0.0154023	0.00192525	0.576266	0.460198	0.232903	0.0307623	0.322261	0.354076	0.0460839	0.842796	0.0581624	4	18	0.222222
GLTP	219267_at				0.86932	0.609172	0.00288219	0.00615814	0.158891	0.180738	0.0525944	0.376748	0.18033	0.565606	0.0322663	0.438615	0.656269	0.804981	0.250361	0.925677	0.402354	0.0190504	4	18	0.222222
GLTPP1	219267_at				0.86932	0.609172	0.00288219	0.00615814	0.158891	0.180738	0.0525944	0.376748	0.18033	0.565606	0.0322663	0.438615	0.656269	0.804981	0.250361	0.925677	0.402354	0.0190504	4	18	0.222222
GMEB2	44146_at				0.0384523	0.330415	0.0939148	0.831041	0.71523	0.419434	0.0277855	0.110289	0.00201645	0.358821	0.755243	0.208651	0.0743512	0.0437022	0.311395	0.269987	0.67331	0.146356	4	18	0.222222
GMFB	202544_at				0.357942	0.393654	0.11826	0.444249	0.627197	0.930047	0.379851	0.11025	0.00220619	0.700078	0.851492	0.183327	0.035451	0.0511709	0.000676253	0.0249492	0.266248	0.228828	4	18	0.222222
GNAI1	209576_at				0.89155	0.701585	0.682468	0.627273	0.542582	0.337599	0.860085	0.611843	0.00689116	0.721855	0.791187	0.00713177	0.900634	0.0357859	0.00276044	0.424396	0.142096	0.984646	4	18	0.222222
GNAT1	214286_at				0.56115	0.641895	0.51746	0.985073	0.733223	0.229394	0.233458	0.0380796	0.0321976	0.387783	0.0534794	0.0826052	0.324032	0.032549	0.371951	0.0057909	0.837534	0.373447	4	18	0.222222
GNB1	200746_s_at				0.611058	0.948314	0.207872	0.202942	0.309284	0.373075	0.544077	0.268064	0.0300987	0.705489	0.916024	0.305144	0.00282908	0.268426	0.191399	0.00342023	0.71808	0.00912252	4	18	0.222222
GNB2	200852_x_at				0.503675	0.124512	0.499103	0.798498	0.37786	0.528361	0.187519	0.336575	0.0218764	0.253114	0.190579	0.686351	0.0461146	0.108321	0.950042	0.00130105	0.460957	0.00118079	4	18	0.222222
GOLM1	217771_at				0.309446	0.90069	0.918196	0.844423	0.33452	0.418506	0.838064	0.512647	0.286312	0.768067	0.335766	0.0149833	0.00496915	0.0229121	0.0248389	0.878546	0.105959	0.589249	4	18	0.222222
GOLT1B	218193_s_at				0.351138	0.926104	0.963093	0.153905	0.209421	0.59263	0.123012	0.165079	0.146105	0.719304	0.088957	0.137109	0.00275042	0.0587233	0.0085019	0.386058	0.0352814	0.0249366	4	18	0.222222
GPD1	213706_at				0.808258	0.724348	0.0379601	0.266985	0.339216	0.890689	0.0283777	0.0598534	0.384305	0.739433	0.815929	0.872543	0.758731	0.176065	0.50943	0.0244334	0.0997887	0.00625357	4	18	0.222222
GPD1L	212510_at				0.73382	0.0811412	0.0874128	0.566943	0.980271	0.145801	0.075003	0.1036	0.0124658	0.0615533	0.84139	0.0102404	0.0323039	0.474208	0.367076	0.248249	0.717462	0.0020373	4	18	0.222222
GPR137	219430_at				0.50879	0.247612	0.983091	0.723714	0.425907	0.0170949	0.376242	0.383196	0.0147347	0.254767	0.440706	0.791103	0.858771	0.0363574	0.235404	0.0462918	0.249454	0.527402	4	18	0.222222
GPR35	210264_at				0.239143	0.544735	0.328684	0.101288	0.133717	0.154623	0.0207817	0.0119911	0.0380057	0.074669	0.312206	0.35343	0.0981693	0.619637	0.827503	0.00349868	0.810896	0.434831	4	18	0.222222
GPR45	211175_at				0.0292923	0.0113583	0.967826	0.85124	0.369068	0.252242	0.216032	0.300339	0.029796	0.103934	0.155634	0.254311	0.835601	0.324835	0.532598	0.00167892	0.85685	0.685544	4	18	0.222222
GPR77	221149_at				0.655228	0.488649	0.0131554	0.0364384	0.103349	0.28408	0.0729795	0.661987	0.00528081	0.183183	0.560103	0.769201	0.436763	0.0656262	0.853673	0.0294639	0.192777	0.217528	4	18	0.222222
GPRASP1	204793_at				0.159709	0.296148	0.0380943	0.178312	0.315801	0.417574	0.0858212	0.0348242	0.0195804	0.147057	0.559852	0.0993559	0.204997	0.168348	0.0367274	0.798701	0.957534	0.134393	4	18	0.222222
GPSM3	214847_s_at				0.243568	0.297512	0.487365	0.685544	0.577966	0.260126	0.213107	0.434211	0.00359779	0.0329326	0.466055	0.401652	0.5312	0.354976	0.548835	0.0161036	0.307893	0.000845809	4	18	0.222222
GPX5	214648_at				0.419065	0.289075	0.454075	0.448767	0.783189	0.925815	0.816754	0.709299	0.00419735	0.00966476	0.759638	0.00415932	0.398928	0.202419	0.0202923	0.0690034	0.745049	0.154201	4	18	0.222222
GRAMD1B	212906_at				0.820938	0.677258	0.968922	0.0814814	0.579372	0.611106	0.677361	0.00940823	0.875929	0.596478	0.349301	0.317572	0.381001	0.0275448	0.394967	0.0357068	0.611784	0.0298719	4	18	0.222222
GRM1	210939_s_at				0.590555	0.494697	0.0219226	0.107593	0.0466276	0.418817	0.31577	0.589833	0.00797465	0.0206679	0.36609	0.204458	0.240119	0.113933	0.658054	0.488172	0.46651	0.924163	4	18	0.222222
GRM2	208465_at				0.283644	0.312054	0.381425	0.0880218	0.753305	0.295068	0.0380839	0.0249305	0.0241175	0.784623	0.095399	0.741766	0.113492	0.23918	0.618067	0.0367446	0.645092	0.13149	4	18	0.222222
GRM7	207548_at				0.568781	0.321992	0.118977	0.00685915	0.216695	0.0314714	0.963478	0.611082	0.0927489	0.0816095	0.0370918	0.142807	0.370311	0.351528	0.585783	0.00164206	0.104403	0.185432	4	18	0.222222
GRN	216041_x_at				0.02871	0.00703486	0.582145	0.572248	0.234204	0.869959	0.242462	0.411928	0.466052	0.301401	0.691913	0.0738385	0.0259035	0.183449	0.370099	0.12681	0.270795	0.00287345	4	18	0.222222
GRPEL1	212434_at				0.897911	0.231956	0.684075	0.874811	0.372713	0.436597	0.0475416	0.0349142	0.0255478	0.188618	0.752587	0.872559	0.0506151	0.255538	0.212211	0.0139834	0.188636	0.446489	4	18	0.222222
GS1-124K5.12	212773_s_at				0.0233579	0.569493	0.0256895	0.202084	0.125182	0.519551	0.350272	0.745185	0.0145911	0.390392	0.294765	0.492766	0.680801	0.172282	0.646431	0.000441373	0.83159	0.272194	4	18	0.222222
GSPT1	201912_s_at				0.0484777	0.803122	0.345095	0.531849	0.65174	0.588104	0.372428	0.806803	0.00162994	0.248608	0.692264	0.0645427	0.162549	0.85786	0.00628729	0.158581	0.219859	0.00262244	4	18	0.222222
GSPT2	205541_s_at				0.722994	0.205963	0.436783	0.0640886	0.951597	0.266037	0.00868009	0.00126125	0.0820907	0.168226	0.100835	0.128824	0.0491071	0.0827153	0.144491	0.89383	0.592312	0.0125506	4	18	0.222222
GSTA4	202967_at				0.474235	0.651784	0.0801035	0.357367	0.484188	0.786421	0.257447	0.235387	0.00592423	0.995852	0.579546	0.0400123	0.043989	0.0415276	0.675008	0.159383	0.372637	0.0982466	4	18	0.222222
GSTM3	202554_s_at				0.168086	0.886821	0.633386	0.944235	0.0446911	0.00525936	0.720601	0.711917	0.0137706	0.116194	0.96038	0.364966	0.320938	0.381112	0.76179	0.00772151	0.745678	0.124429	4	18	0.222222
GTF2E2	202680_at				0.576845	0.873216	0.297326	0.620712	0.668405	0.802138	0.662292	0.868393	0.0176395	0.836913	0.0149202	0.18508	0.449618	0.045664	0.510892	0.668296	0.494189	0.0241466	4	18	0.222222
GTF2H1	202453_s_at				0.502242	0.232963	0.725651	0.0218839	0.941798	0.0312532	0.785311	0.630134	0.00366165	0.476969	0.857162	0.865878	0.141277	0.105906	0.910817	0.00136014	0.191104	0.20732	4	18	0.222222
GTF2H2	221540_x_at				0.0526436	0.858146	0.853969	0.527846	0.135796	0.0096294	0.0180424	0.0407964	0.0321978	0.793443	0.398714	0.914993	0.62528	0.104122	0.216095	0.34015	0.175705	0.0713815	4	18	0.222222
GTF2H2B	221540_x_at				0.0526436	0.858146	0.853969	0.527846	0.135796	0.0096294	0.0180424	0.0407964	0.0321978	0.793443	0.398714	0.914993	0.62528	0.104122	0.216095	0.34015	0.175705	0.0713815	4	18	0.222222
GTF2H2C	221540_x_at				0.0526436	0.858146	0.853969	0.527846	0.135796	0.0096294	0.0180424	0.0407964	0.0321978	0.793443	0.398714	0.914993	0.62528	0.104122	0.216095	0.34015	0.175705	0.0713815	4	18	0.222222
GTPBP8	221046_s_at				0.71643	0.849203	0.169884	0.837657	0.0160907	0.365088	0.0203288	0.0382416	0.825341	0.576875	0.306872	0.469424	0.502673	0.691944	0.0960815	0.535938	0.729476	0.0353782	4	18	0.222222
GUCY1A2	206927_s_at				0.535648	0.3512	0.108562	0.00579737	0.0324849	0.0243572	0.383454	0.795302	0.0403011	0.114797	0.118567	0.053328	0.214446	0.392851	0.400982	0.813542	0.603207	0.0931232	4	18	0.222222
GUCY1B3	203817_at				0.924356	0.649838	0.558982	0.0502082	0.877549	0.126388	0.0864326	0.0372699	0.0124446	0.925068	0.745282	0.159868	0.179212	0.132974	0.0218123	0.798028	0.0049511	0.174264	4	18	0.222222
GUK1	200075_s_at				0.646895	0.279743	0.0421375	0.18507	0.0878754	0.265382	0.983669	0.392231	0.0415538	0.290439	0.114966	0.240747	0.0239907	0.431238	0.263423	0.0106589	0.461389	0.943186	4	18	0.222222
GVINP1	220577_at				0.555599	0.504595	0.834147	0.0441775	0.481002	0.0335898	0.201576	0.870566	0.0968413	0.914847	0.994603	0.958814	0.873741	0.144383	0.252458	0.0475306	0.908742	0.035819	4	18	0.222222
GYG1	211275_s_at				0.176058	0.692061	0.107706	0.784677	0.0536917	0.319977	0.297243	0.652286	0.0163305	0.482086	0.826284	0.0251862	0.04792	0.598612	0.223864	0.448995	0.0393575	0.128742	4	18	0.222222
GYG2	215695_s_at				0.17948	0.0376024	0.0386153	0.782232	0.0129171	0.401324	0.58752	0.104876	0.599011	0.788575	0.808034	0.0169499	0.666736	0.55342	0.380414	0.534643	0.415926	0.867489	4	18	0.222222
GYPB	214407_x_at				0.233534	0.811685	0.774201	0.415208	0.513106	0.306696	0.00769185	0.0837239	0.0841022	0.0446353	0.0478206	0.721574	0.8339	0.346135	0.475458	0.0231587	0.784886	0.184757	4	18	0.222222
GYPC	202947_s_at				0.342019	0.927092	0.0364365	0.189081	0.153665	0.385946	0.0693884	0.0271552	0.0189947	0.266325	0.705724	0.280885	0.0293598	0.344626	0.286824	0.118546	0.745679	0.265268	4	18	0.222222
GZMA	205488_at				0.600956	0.490426	0.750466	0.726904	0.967913	0.515898	0.785711	0.945854	0.0062078	0.801643	0.315925	0.0106684	0.0365728	0.601425	0.0155468	0.966981	0.841246	0.187149	4	18	0.222222
GZMH	210321_at				0.0575562	0.0153849	0.720896	0.614364	0.624515	0.99098	0.0358177	0.0797741	0.0121851	0.256627	0.260667	0.00284317	0.586275	0.458788	0.135954	0.385506	0.828456	0.296052	4	18	0.222222
HABP4	209818_s_at				0.488227	0.0400996	0.0336476	0.0313994	0.113556	0.0814842	0.892334	0.497327	0.383106	0.149698	0.715616	0.519219	0.00924845	0.149999	0.189461	0.23719	0.73723	0.212295	4	18	0.222222
HADH	201036_s_at				0.267491	0.371733	0.445742	0.558168	0.0903244	0.115953	0.0168985	0.0351128	0.00693099	0.0734823	0.290488	0.117773	0.262108	0.23549	0.0121094	0.670409	0.253742	0.0732814	4	18	0.222222
HADHA	208631_s_at				0.0404851	0.0184158	0.202425	0.380973	0.131657	0.127335	0.307552	0.829013	1.56e-05	0.538482	0.332569	0.0414013	0.075448	0.741748	0.605081	0.477467	0.560149	0.6823	4	18	0.222222
HADHB	201007_at				0.132077	0.00789716	0.0417137	0.733504	0.075588	0.0450692	0.57664	0.293777	0.0424773	0.538178	0.246745	0.195498	0.322912	0.726435	0.403326	0.151152	0.133756	0.261188	4	18	0.222222
HBXIP	202300_at				0.958007	0.25768	0.906919	0.298074	0.531601	0.916055	0.974602	0.841589	0.0046345	0.828489	0.395224	0.905247	0.892787	0.0130034	0.0181353	0.020005	0.388284	0.571558	4	18	0.222222
HCCS	203746_s_at				0.289297	0.868294	0.707113	0.816597	0.584381	0.883896	0.0354824	0.00502912	0.132466	0.708146	0.047037	0.332458	0.287199	0.155937	0.104468	0.0214864	0.192959	0.599646	4	18	0.222222
HCK	208018_s_at				0.81313	0.721166	0.941134	0.943853	0.995906	0.882218	0.0177881	0.0392666	0.106914	0.10518	0.484146	0.0129665	0.145198	0.0766168	0.552093	0.279062	0.099928	0.0206908	4	18	0.222222
HDAC4	204225_at				0.319145	0.888112	0.216241	0.0818077	0.0165346	0.0168274	0.847257	0.859903	0.807966	0.0367917	0.152422	0.18818	0.720461	0.0519322	0.616344	0.0391113	0.746407	0.22931	4	18	0.222222
HDAC9	205659_at				0.208111	0.719493	0.654352	0.639943	0.399763	0.218441	0.0368891	0.0256125	0.478577	0.456545	0.120217	0.691149	0.259862	0.777422	0.000529919	0.0045216	0.878849	0.299111	4	18	0.222222
HDC	207067_s_at				0.0253635	0.455401	0.193609	0.0428914	0.197354	0.0302849	0.0952162	0.0528337	0.0669203	0.189482	0.0965507	0.00853358	0.772636	0.364229	0.305011	0.377443	0.825957	0.528782	4	18	0.222222
HEMK1	218620_s_at				0.71719	0.178882	0.0466578	0.164356	0.336709	0.507866	0.187578	0.0100274	0.233592	0.496043	0.577522	0.324878	0.000483252	0.0241707	0.449946	0.83964	0.99531	0.530981	4	18	0.222222
HEPH	203902_at				0.0906764	0.389665	0.0301712	0.962217	0.0122707	0.285358	0.500531	0.988637	0.00692995	0.20877	0.867655	0.138148	0.123327	0.132003	0.34846	0.00149147	0.561221	0.788387	4	18	0.222222
HEXA	201765_s_at				0.0636013	0.0631713	0.107536	0.265688	0.0513137	0.867391	0.442824	0.0977012	0.0195786	0.0136282	0.971755	0.146248	0.00797503	0.153965	0.694971	0.0249113	0.245341	0.0588532	4	18	0.222222
HEXB	201944_at				0.77779	0.275002	0.100815	0.44588	0.00788346	0.62845	0.836071	0.726526	0.0739924	0.649067	0.184625	0.00444785	0.0395779	0.626438	0.0055753	0.586811	0.361994	0.234002	4	18	0.222222
HEXIM1	202815_s_at				0.740409	0.149193	0.0444423	0.179987	0.107492	0.271129	0.0875167	0.200541	0.332921	0.426974	0.745163	0.00390972	0.809146	0.0746175	0.018539	0.00106715	0.739021	0.55914	4	18	0.222222
HGF	210998_s_at				0.960201	0.838531	0.245947	0.531191	0.00991929	0.676148	0.188568	0.410029	0.0132139	0.187725	0.8501	0.0353071	0.22338	0.305772	0.556132	0.00776063	0.972265	0.163058	4	18	0.222222
HHEX	215933_s_at				0.570881	0.488411	0.298807	0.72654	0.826177	0.465945	0.037526	0.763556	0.03374	0.359243	0.98801	0.0254689	0.0171191	0.584637	0.533316	0.050501	0.241848	0.878035	4	18	0.222222
HIF3A	222124_at				0.476051	0.541272	0.166379	0.475268	0.0366919	0.382233	0.838185	0.60858	0.0312531	0.569017	0.72833	0.243045	0.0466238	0.114382	0.535591	0.44844	0.00656245	0.360994	4	18	0.222222
HINT1	200093_s_at				0.461887	0.679161	0.0779269	0.567793	0.0359531	0.459516	0.422151	0.843392	0.0143495	0.116058	0.785252	0.736848	0.155238	0.318775	0.0233483	0.00401339	0.458551	0.367554	4	18	0.222222
HIST1H2BC	214455_at				0.260321	0.353544	0.0488481	0.0783323	0.070674	0.289828	0.676682	0.241641	0.0219674	0.0909913	0.534278	0.092597	0.0289425	0.483066	0.0611848	0.0273838	0.213057	0.119863	4	18	0.222222
HIST1H2BD	222067_x_at				0.678132	0.74042	0.0514404	0.413747	0.0627909	0.806905	0.0405712	0.0414348	0.691744	0.962877	0.566209	0.778387	0.928976	0.97246	0.0924578	0.00290339	0.26	0.0282543	4	18	0.222222
HK3	205936_s_at				0.49472	0.791106	0.740513	0.0252317	0.874017	0.363888	0.292628	0.46452	0.110684	0.556992	0.25756	0.00956172	0.0632672	0.00195554	0.741896	0.751602	0.0510097	0.0125849	4	18	0.222222
HLA-B	209140_x_at				0.108152	0.132408	0.0712513	0.00267518	0.277877	0.0515938	0.0947899	0.0984117	0.499554	0.333019	0.963196	0.447095	0.321279	0.166244	0.970743	0.026149	0.0471512	0.000596419	4	18	0.222222
HLA-DMB	203932_at				0.613153	0.273209	0.688367	0.0162633	0.510873	0.507884	0.460656	0.634251	0.00262416	0.165645	0.314912	0.00127948	0.00364527	0.416788	0.110657	0.348302	0.281403	0.837737	4	18	0.222222
[truncated: 21,816 more rows]

## Sheet: all_ranked_genes_of_obesity
GSE				GSE474(1)	GSE474(2)	GSE9624	GSE10946	GSE15653	GSE18897(1)	GSE18897(2)	GSE29718(1)	GSE28005	GSE2508(1)	GSE2508(2)	GSE25401	GSE29718(2)	GSE29718(3)	P<=0.05	Total	Percentages	Tissues of genes with top highly differencial expression among datasets
Group				Group1	Group2	Group3	Group4	Group5	Group6	Group7	Group8	Group9	Group10	Group11	Group12	Group13	Group14
GPL				HG-U133A	HG-U133A	HG-U133_Plus_2	HG-U133_Plus_2	HG-U133_Plus_2	HG-U133_Plus_2	HG-U133_Plus_2	HuGene-1_0-st	HG-U133_Plus_2	HG_95B	HG_95B	HuGene-1_0-st	HuGene-1_0-st	HuGene-1_0-st
tissue				skeletal muscle	skeletal muscle	omental adipose tissue	cumulus cells	liver	blood	blood	visceral tissue	subcutaneous adipose tissue	subcutaneous adipose tissue	subcutaneous adipose tissue	subcutaneous adipose tissue	subcutaneous adipose tissue	subcutaneous adipose tissue
Gene	Affymetrix probe-ID
BCAT1	225285_at	54904_at	7961829			0.0194496	0.843282		0.0104518	0.000189122	0.956881	0.00200237	4.59e-05	0.0204916	8.21e-06	0.553598	0.822523	7	11	0.636364	omental adipose tissue，Whole blood，subcutaneous adipose tissue
BMP2K	226853_at	59644_at	8096004			0.239149	0.134586		0.000842198	6.79e-05	0.363084	0.00649104	0.0038143	0.0313966	2.64e-07	0.031497	0.317054	7	11	0.636364	Whole blood，subcutaneous adipose tissue
CSRNP2	221260_s_at		7963235	0.0496759	0.0364594	0.912817	0.570509	0.0405017	0.0391763	0.0166757		0.0487716			0.0267586	0.797003	0.917896	7	11	0.636364	skeletal muscle，Whole blood，subcutaneous adipose tissue
MYNN	224206_x_at	56327_at	8083794			0.636436	0.0456954		0.000331241	0.00256896	0.451306	0.0400584	0.383351	0.000637321	0.0356134	0.00878193	0.96153	7	11	0.636364	cumulus cells，Whole blood，subcutaneous adipose tissue
NCKAP5L	231865_at	59196_at	7963134			0.257391	0.0401632		0.0215974	0.0372287	0.548673	0.0263568	0.0305489	0.0292152	0.0172539	0.576093	0.588512	7	11	0.636364	cumulus cells，Whole blood，subcutaneous adipose tissue
SAP30BP	222475_at	57478_at	8009932			0.00805073	0.49385		0.00862438	0.00106936	0.796352	0.0275444	0.0338373	0.0484953	0.019255	0.155206	0.899521	7	11	0.636364	omental adipose tissu，Whole blood，subcutaneous adipose tissue
SLC35B4	238418_at	54813_at	8143040			0.0391355	0.351376		0.0124141	0.0177239	0.394768	0.000538736	0.0314386	0.000192111	0.000622806	0.826095	0.151315	7	11	0.636364	omental adipose tissue，Whole blood，subcutaneous adipose tissue
SP1	1553685_s_at	50335_at	7955787			0.0372085	0.726501		0.0182867	0.0225056	0.711437	0.0373867	0.000986852	0.000326361	0.000188327	0.33825	0.875767	7	11	0.636364	omental adipose tissue，Whole blood，subcutaneous adipose tissue
ABCG1	211113_s_at		8068761	0.866319	0.0378725	0.0414914	0.782643	0.0405833	0.00123577	0.00399596	0.0244254	0.309187			0.0130788	0.765476	0.860197	7	12	0.583333
BPGM	203502_at		8136341	0.0665729	0.0047966	0.00693661	0.932729	0.0217152	0.00023269	5.55e-05	0.29215	0.00132077			0.00210886	0.23208	0.581443	7	12	0.583333
ITGA5	201389_at		7963786	0.00595025	0.0403141	0.287703	0.868871	0.00303785	0.00793003	0.0280292	0.266565	0.00579841			1.11e-05	0.713655	0.866864	7	12	0.583333
MAP4	33850_at		8086842	0.123113	0.0286531	0.0147213	0.242056	0.0012758	0.0477823	0.0106996	0.216557	0.00249855			0.000172817	0.827364	0.16535	7	12	0.583333
P4HB	200654_at		8019762	0.784477	0.0438925	0.0761871	0.456954	0.0235567	0.00165939	0.000107583	0.0145386	0.0244028			0.000397595	0.135831	0.395695	7	12	0.583333
PUM2	216221_s_at		8050565	0.966019	0.330743	0.0178956	0.00685628	0.0183176	0.00308295	0.00197191	0.559153	0.00742826			0.00896626	0.108756	0.58532	7	12	0.583333
LUC7L3	220044_x_at	55032_at	8008493	0.04955	0.535278	0.457235	0.641537	0.0472094	0.00180716	0.0204558	0.420637	0.0165519	0.0433717	0.0368818	0.249395	0.0225987	0.81865	8	14	0.571429
SIGIRR	218921_at	52940_at	7945377	0.0433724	0.344611	0.000243233	0.716235	0.0350884	0.000266171	0.00220279	0.277061	0.0101162	0.00204511	0.0153773	0.148986	0.342375	0.325362	8	14	0.571429
ADAMTS15	1553427_at	49171_at	7945232			0.340681	0.521294		0.0203782	0.0251551	0.0500917	0.0277628	6.28e-06	1.81e-08	1.06e-06	0.789671	0.41045	6	11	0.545455
ALG13	222808_at	56953_at	8169419			0.850107	0.011204		0.00905663	0.0166069	0.296163	0.00126016	0.185583	0.023213	0.0188329	0.105175	0.889447	6	11	0.545455
[truncated: 14,351 more rows]
