# Supplementary material for: Identifying Candidate Genes for Type 2 Diabetes Mellitus and Obesity through Gene Expression Profiling in Multiple Tissues or Cells
Source: J Diabetes Res. 2013 Dec 26;2013:970435. doi: 10.1155/2013/970435 (PMC3888709; doi:10.1155/2013/970435)
Supplement: Supplementary file 6 [file 970435.f6.xls]

## Sheet: T2DM_p-value_before_adjusting
Genes	Affymetrix probe-ID	GDS3681	GDS3715(1)	GDS3715(2)	GSE9006	GSE13760	GSE15653	GSE15773(1)	GSE15773(2)	GSE15932	GSE18732(1)	GSE18732(2)	GSE19420(1)	GSE19420(2)	GSE19420(3)	GSE19420(4)	GSE23343	GSE25462(1)	GSE25462(2)	GSE25724	GSE26637(1)	GSE26637(2)	p<=0.05	count	percentages
LYN	210754_s_at				0.0622443	0.386576	0.218265	0.0616139	0.909692	0.0459893	0.0118182	0.414794	0.00440343	0.00153087	0.0323678	0.021204	0.045409	0.0432253	0.102736	0.0308968	0.0333857	0.0169914	11	18	0.611111
CAPZB	201949_x_at				0.000286165	0.908909	0.266707	0.686355	0.758977	0.0322166	0.361409	0.0659586	0.00564556	0.0226335	0.0250619	0.0193461	0.0233563	0.994678	0.0940584	0.971791	0.0113976	0.0334061	9	18	0.5
PRKCB	209685_s_at				0.0140938	0.932206	0.772213	0.341135	0.65734	0.17495	0.0384209	0.0130235	0.00749519	0.0226373	0.350134	0.17859	0.00247336	0.560165	0.278635	0.00956217	0.0482384	0.00231767	9	18	0.5
DENND1B	219696_at				0.0419186	0.0282795	0.961546	0.640987	0.553969	0.00355447	0.908576	0.358278	0.00094604	0.0393458	0.18615	0.551182	0.0377777	0.128984	0.0230525	0.0129327	0.095344	0.0456702	9	18	0.5
POC1B	226283_at							0.39123	0.101305	0.00796272	0.113271	0.569822	0.989651	0.911293	0.0259135	0.0292528	0.008954	0.007692	0.0201726		0.463446	0.0418733	7	14	0.5
C2orf15	243887_at							0.149153	0.0208804	0.0072856	0.137897	0.945579	0.00242569	0.0693391	0.0420688	0.269447	0.0235657	0.00326274	0.00727981		0.834511	0.183605	7	14	0.5
RP4-655J12.3	244606_at							0.0560974	0.395228	0.0244385	0.0283817	0.409263	0.0062713	0.218091	0.0130024	0.215849	0.00728102	0.0417299	0.0959885		0.816647	0.0489194	7	14	0.5
CAPZB	37012_at	0.135558	0.0077135	0.029138	0.0328282	0.904766	0.124684	0.3868	0.462916	0.079153	0.976923	0.707443	0.0352034	0.0179057	0.0612566	0.0486595	0.0413851	0.0825145	0.0205302	0.973609	0.0351053	0.0301121	10	21	0.47619
2013-09-02	200015_s_at				0.47404	0.159958	0.0211101	0.921715	0.451846	0.0325387	0.0195211	0.0224478	0.0874711	0.176039	0.0138836	0.0217468	0.0236614	0.457059	0.596261	0.0611891	0.262137	0.0162296	8	18	0.444444
PWP1	201607_at				0.000457593	0.0413314	0.234862	0.578405	0.27842	0.00618338	0.952171	0.232047	0.03318	0.0148326	0.0599873	0.0334869	0.0944293	0.324003	0.0796869	0.00388691	0.47115	0.037361	8	18	0.444444
STAB1	204150_at				0.533103	0.0727877	0.546109	0.846768	0.560965	0.0278743	0.946883	0.705975	0.00628698	0.0384297	0.018646	0.150422	0.19695	0.0014622	0.00309157	0.595911	0.0297047	0.0192058	8	18	0.444444
DBF4	204244_s_at				0.061163	0.0354145	0.257955	0.938184	0.116693	0.045076	0.566109	0.278428	0.0113904	0.0490099	0.363645	0.359571	0.0179221	0.0154667	0.0160285	0.00964893	0.334474	0.080647	8	18	0.444444
FAM175B	212837_at				0.00196159	0.0467091	0.403034	0.39828	0.408408	0.000311187	0.286356	0.322339	0.0429223	0.00755034	0.455942	0.495347	0.0450264	0.411323	0.307678	0.0247576	0.521088	0.0147316	8	18	0.444444
SLC30A1	212907_at				0.322454	0.838625	0.481701	0.799577	0.200519	0.0055632	0.186157	0.606189	0.00589217	0.0480703	0.458309	0.511111	0.0424816	0.00379075	0.00367194	0.00209847	0.162973	0.0128115	8	18	0.444444
RAB31	217763_s_at				0.0804862	0.556736	0.0959134	0.214271	0.0256999	0.00385836	0.797341	0.896098	0.0259858	0.0340078	0.00601546	0.00945961	0.0858763	0.217101	0.308779	0.848282	0.00103863	0.0182064	8	18	0.444444
EFHD2	217992_s_at				0.000204325	0.384552	0.231311	0.0101013	0.837868	9.11e-05	0.458508	0.507988	0.0168003	0.00344415	0.306196	0.0721265	0.422419	0.0312118	0.00932062	0.646969	0.130557	0.0361884	8	18	0.444444
EDN1	218995_s_at				0.00355337	0.0129941	0.649673	0.689376	0.433839	0.406867	0.0453052	0.0593989	0.526294	0.0473873	0.551925	0.019416	0.199684	0.0160361	0.04866	0.167554	0.532117	0.0415797	8	18	0.444444
TTC33	219421_at				0.00172224	0.0143472	0.203826	0.309123	0.120633	0.0179049	0.882123	0.505182	0.88333	0.254585	0.398601	0.630296	0.00949293	0.0254752	0.0468876	0.0050426	0.275631	0.0338576	8	18	0.444444
QSER1	219705_at				0.0225119	0.031596	0.67556	0.506409	0.000993613	0.2181	0.926685	0.0457645	0.00835388	0.324002	0.0342152	0.0221879	0.806926	0.985146	0.150993	0.0501851	0.508801	0.0185346	8	18	0.444444
ITGB2	1555349_a_at							0.676895	0.345159	0.00199663	0.0149879	0.416085	0.428693	0.999217	0.276367	0.712346	0.48802	0.0100339	0.0129266		0.000918913	0.0331684	6	14	0.428571
CXCL16	223454_at							0.556976	0.952621	0.036262	0.457788	0.560758	0.0144228	0.0475598	0.055582	0.291693	0.128234	0.0752731	0.0424753		0.0465225	0.013709	6	14	0.428571
OSBPL6	223805_at							0.363634	0.189836	0.638034	0.0150077	0.380319	0.0420254	0.0339591	0.173754	0.180047	0.0375728	0.0104077	0.0404661		0.750673	0.613902	6	14	0.428571
RP11-745O10.4	223892_s_at							0.428379	0.415853	0.801655	0.722731	0.303354	0.0132348	0.0134416	0.0449261	0.0239732	0.0258184	0.0112996	0.085198		0.507827	0.200031	6	14	0.428571
ZNF627	224492_s_at							0.193466	0.321527	0.00908801	0.35657	0.455988	0.0337255	0.0248989	0.187636	0.05652	0.360602	0.00644618	0.0133531		0.690725	0.00751875	6	14	0.428571
SNORD118	224496_s_at							0.969428	0.917477	0.811838	0.375561	0.00445502	0.121492	0.114493	0.00961945	0.0139319	0.0262534	0.561779	0.270949		0.0487119	0.0334295	6	14	0.428571
COTL1	224583_at							0.0554053	0.467687	0.00663991	0.422022	0.670211	0.0856945	0.0173839	0.29492	0.0859755	0.394807	0.0444622	0.0324407		0.0103153	0.00415343	6	14	0.428571
HIBADH	224812_at							0.237143	0.411445	0.0115463	0.000870215	0.900221	0.0483904	0.0391915	0.493221	0.868188	0.294891	0.0430189	0.0151073		0.797598	0.912509	6	14	0.428571
ETS1	224833_at							0.224498	0.654433	0.024979	0.6908	0.720937	0.0378025	0.00434392	0.0334196	0.0063477	0.0142532	0.547839	0.199212		0.929753	0.499603	6	14	0.428571
CDK6	224848_at							0.0310507	0.41248	0.0193988	0.813892	0.717961	0.0535651	0.146759	0.0161594	0.0380329	0.6444	0.0620031	0.0462708		0.0678317	0.000646843	6	14	0.428571
FAM214A	225327_at							0.439671	0.947092	0.0498198	0.869935	0.109457	0.0198114	0.0113412	0.549729	0.319042	0.755376	0.000722537	0.0414603		0.813951	0.00249518	6	14	0.428571
TMEM64	225974_at							0.430335	0.0179559	0.0238303	0.73297	0.260227	0.0383942	0.0192608	0.690825	0.408246	0.0222795	0.84375	0.794681		0.0495979	0.0674157	6	14	0.428571
ZNF791	227122_at							0.203763	0.27287	0.0392643	0.224751	0.369808	0.0047016	0.00388084	0.091247	0.0291811	0.438305	0.00508131	0.005992		0.15522	0.494701	6	14	0.428571
SRGAP1	227484_at							0.795115	0.0266697	0.612332	0.203771	0.808394	0.0230495	0.16977	0.0100634	0.0783457	0.00236768	0.622737	0.0677096		0.0190738	0.00104953	6	14	0.428571
MRPS30	227600_at							0.052237	0.304475	5.94e-05	0.728496	0.725881	0.000780903	0.014628	0.794001	0.932837	0.0337845	0.00631537	0.00787125		0.292977	0.949357	6	14	0.428571
FAM92A1	228011_at							0.683527	0.0451913	0.872842	0.12889	0.516401	0.0039917	0.381881	0.526155	0.598008	0.0195962	0.0766208	0.0119403		0.0194405	0.0202359	6	14	0.428571
ZNF302	228392_at							0.10797	0.0987741	0.000294513	0.204465	0.0313849	0.00605859	0.0612638	0.00599054	0.104619	0.188651	0.0324557	0.0192068		0.127954	0.318583	6	14	0.428571
LYRM7	228841_at							0.716897	0.175841	0.005657	0.0328045	0.671899	0.0161638	0.812486	0.501823	0.424128	0.0308074	0.125225	0.0363895		0.9411	0.0392289	6	14	0.428571
FAM120C	229512_at							0.129346	0.925662	0.0211375	0.725881	0.609414	0.0213339	0.152896	0.00651453	0.0405936	0.987202	0.12143	0.0228068		0.0260878	0.0597954	6	14	0.428571
GAS2L3	238756_at							0.843998	0.0636145	0.990031	0.854204	0.482171	0.0969899	0.0230221	0.0382628	0.003853	0.121974	0.315025	0.0356942		0.0290372	0.00381769	6	14	0.428571
DAB2	240873_x_at							0.320739	0.287106	0.84354	0.0157559	0.0259093	0.814087	0.500027	0.427154	0.715362	0.656883	0.0262282	0.00272708		0.000932302	0.000797718	6	14	0.428571
RBMS3	242137_at							0.351523	0.869542	0.546729	0.0351358	0.918184	0.333672	0.591522	0.0387265	0.0251625	0.294738	0.00385216	0.0384255		0.238838	0.00921149	6	14	0.428571
TMED2	200087_s_at				0.00350175	0.199091	0.948973	0.778017	0.731717	0.0830928	0.0348561	0.975114	0.00794192	0.0625421	0.0415749	0.158433	0.0410785	0.451768	0.619898	0.000857488	0.0362363	0.286384	7	18	0.388889
CCND2	200953_s_at				0.423728	0.190314	0.0749603	0.507339	0.828725	0.0380687	0.846322	0.384279	0.015396	0.816858	0.0035641	0.275614	0.0490713	0.731327	0.355795	0.0268519	0.0114838	0.00947427	7	18	0.388889
PPT1	200975_at				0.84454	0.0489882	0.0968602	0.747725	0.345545	0.11585	0.995904	0.150892	0.657356	0.733991	0.176754	0.225288	0.0207017	0.0350909	0.0228068	0.00281642	0.00279352	0.0036203	7	18	0.388889
EIF2S1	201144_s_at				0.064603	0.0939521	0.039006	0.321233	0.658803	0.00201053	0.821753	0.251725	0.0188647	0.0365324	0.550123	0.776021	0.0206288	0.0442185	0.125116	0.0285908	0.556721	0.936122	7	18	0.388889
CYB5B	201634_s_at				0.183332	0.0296942	0.872976	0.808901	0.015788	0.0172772	0.042341	0.328578	0.716105	0.79231	0.656758	0.579539	0.00261392	0.023904	0.077446	0.0182588	0.267973	0.902516	7	18	0.388889
SMC4	201663_s_at				0.017983	0.235843	0.514464	0.419074	0.0747762	0.0439948	0.748105	0.307076	0.0046357	0.00135594	0.923348	0.886514	0.0374951	0.542639	0.851941	0.0281608	0.15156	0.00114623	7	18	0.388889
SMC4	201664_at				0.0135839	0.0780568	0.00963631	0.344045	0.092686	0.0163775	0.580061	0.953515	5.88e-05	0.0976371	0.42337	0.751155	0.034076	0.412611	0.350115	0.00853719	0.469191	0.0254623	7	18	0.388889
CLCN3	201735_s_at				0.0325857	0.155109	0.0229212	0.395197	0.144771	0.293113	0.377403	0.305814	0.912253	0.0782943	0.918137	0.102197	0.0312947	0.0122556	0.0201036	0.0306662	0.22	0.0179926	7	18	0.388889
CD14	201743_at				0.0397995	0.467623	0.0401467	0.631148	0.858129	0.000992143	0.346507	0.0237419	0.0863575	0.797038	0.109777	0.600252	0.13847	0.137154	0.0823248	0.0292529	0.000986316	0.0393696	7	18	0.388889
CAPG	201850_at				0.11203	0.994311	0.0101364	0.46489	0.758788	0.000410676	0.699403	0.532762	0.0117307	0.112309	0.0439502	0.263298	0.89884	0.0264924	0.0159037	0.467579	0.225345	0.000773376	7	18	0.388889
IGF2	202409_at				0.408206	0.0376307	0.023551	0.542947	0.326195	0.196506	0.942434	0.518956	0.212827	0.00550007	0.04795	0.000252144	0.102857	0.0460357	0.0229334	0.050895	0.30465	0.301756	7	18	0.388889
PRKACA	202801_at				0.261402	0.909048	0.103934	0.541148	0.0313723	0.0334581	0.224764	0.0222425	0.00982664	0.0912598	0.00887874	0.0468729	0.856398	0.192116	0.332472	0.000274625	0.447476	0.580418	7	18	0.388889
RASSF2	203185_at				0.200628	0.0338483	0.142456	0.0249322	0.311877	0.136588	0.286419	0.222799	0.00285354	0.00628344	0.0100128	0.190621	0.128897	0.290463	0.0842285	0.0959167	0.0124027	0.0109816	7	18	0.388889
CD163	203645_s_at				0.471944	0.320658	0.915077	0.863189	0.719436	0.728261	0.4473	0.0265692	0.00737027	0.808774	0.0396483	0.900281	0.0411844	0.00151312	0.16977	0.307535	0.00866697	0.0014387	7	18	0.388889
GCA	203765_at				0.379709	0.251561	0.246324	0.956401	0.283681	0.846558	0.431365	0.0174815	0.0164399	0.00305223	0.0855108	0.0198166	0.00849455	0.779168	0.983163	0.00475123	0.218362	0.0271779	7	18	0.388889
CD82	203904_x_at				0.0756132	0.0332921	0.0683943	0.181116	0.390826	0.0253961	0.666768	0.231526	0.825729	0.0447475	0.513791	0.0224154	0.0882185	0.0287174	0.0455852	0.0281554	0.769016	0.89958	7	18	0.388889
TYROBP	204122_at				0.403691	0.454504	0.205368	0.700047	0.22649	0.00089621	0.197336	0.775772	0.00774773	0.0393533	0.592374	0.488091	0.588399	0.00197945	0.0150882	0.717194	0.000347518	0.0041826	7	18	0.388889
ENPP4	204160_s_at				0.231645	0.0258862	0.91025	0.0763991	0.608175	0.0307821	0.306684	0.155094	0.990897	0.578225	0.595759	0.29036	0.0124011	0.0291964	0.0422061	0.00133056	0.662143	0.0118127	7	18	0.388889
CCR1	205098_at				8.24e-06	0.625769	0.242964	0.715083	0.239215	0.200396	0.409152	0.0166503	0.0691241	0.299234	0.511553	0.904045	0.0152216	0.0327495	0.00491217	0.837181	0.00398472	0.000579643	7	18	0.388889
MAN2A1	205105_at				0.00191376	0.864949	0.0398291	0.841105	0.582144	0.0107583	0.0426686	0.0504242	0.109239	0.394479	0.0916731	0.458543	0.129808	0.935253	0.804894	0.0230522	0.0437754	0.0327801	7	18	0.388889
ZNF175	205497_at				0.000616898	0.459997	0.0542213	0.218911	0.720481	0.000618015	0.00568445	0.806591	0.0230206	0.520522	0.00679611	0.506978	0.172975	0.0241414	0.00104141	0.159259	0.571441	0.331213	7	18	0.388889
KIAA0586	205631_at				1.79e-05	0.0868472	0.527978	0.501137	0.17553	0.0461241	0.0462072	0.548105	0.00669856	0.258348	0.0148491	0.532601	0.570621	0.552163	0.254218	0.0413645	0.486812	0.0111187	7	18	0.388889
C1orf38	207571_x_at				0.394167	0.0187071	0.142725	0.465484	0.828837	0.028613	0.857705	0.0496649	0.543364	0.013391	0.37801	0.169357	0.143195	0.0237516	0.0655769	0.250954	0.00227217	0.0377756	7	18	0.388889
PDIA3	208612_at				2.06e-07	0.292944	0.278178	0.55704	0.773024	0.77923	0.395558	0.780224	0.104761	0.10143	0.0474467	0.0316836	0.0277668	0.969416	0.259574	0.042857	0.0104816	0.0351506	7	18	0.388889
RPL39	208695_s_at				0.0105076	0.791041	0.095241	0.407472	0.642752	0.0588573	0.0428743	0.01759	0.0150906	0.48679	0.0256074	0.238174	0.159522	0.476801	0.389465	0.724584	0.0124049	0.00593192	7	18	0.388889
HBP1	209102_s_at				0.00323748	0.722545	0.0304826	0.809889	0.693226	0.513937	0.283323	0.0266875	0.0804436	0.011014	0.119737	0.0337566	0.788455	0.22349	0.291464	0.00852802	0.161842	0.0138007	7	18	0.388889
HBB	209116_x_at				0.046819	0.132916	0.0388228	0.0392958	0.19104	0.0168099	0.543883	0.148594	0.248464	0.0929528	0.0272151	0.00470355	0.59284	0.00594323	0.329258	0.550436	0.32357	0.462306	7	18	0.388889
KAT5	209192_x_at				0.966122	0.252233	0.317467	0.961205	0.634997	0.07213	0.104287	0.32992	0.010396	0.0457498	0.00724054	0.0312379	0.602353	0.0963885	0.0191928	0.0184124	0.88992	0.0168702	7	18	0.388889
HBA1	209458_x_at				0.106253	0.118084	0.0284858	0.0943295	0.442067	0.0158871	0.527962	0.047481	0.163246	0.161956	0.0409458	0.0339893	0.228444	0.00896112	0.0838017	0.035847	0.355224	0.338154	7	18	0.388889
ATR	209902_at				0.0245788	0.561064	0.276531	0.246047	0.0268163	0.0202269	0.0399946	0.611712	0.751543	0.458982	0.414031	0.72249	0.551869	0.0612023	0.355785	0.00454647	0.00322448	0.000596786	7	18	0.388889
FCGR2A	210992_x_at				0.164832	0.906806	0.0414688	0.914908	0.385962	0.146504	0.822499	0.370383	0.0188404	0.850018	0.521173	0.807223	0.0696404	0.00425132	0.0223834	0.016121	0.0131499	0.00588646	7	18	0.388889
HBB	211696_x_at				0.0411689	0.145117	0.0295034	0.0423304	0.121497	0.0142776	0.558509	0.129627	0.297855	0.0963456	0.0247572	0.00293761	0.616077	0.00680279	0.36165	0.324562	0.233101	0.331529	7	18	0.388889
PEG10	212094_at				0.00848432	0.96735	0.255951	0.939267	0.0160156	0.0332006	0.761558	0.843224	0.929316	0.569082	0.23862	0.343822	0.0219707	0.816341	0.416522	0.00289961	0.0244643	0.000786336	7	18	0.388889
ACACA	212186_at				0.00138722	0.627378	0.0475259	0.401268	0.0633184	0.575016	0.0163833	0.17114	0.0114007	0.149609	0.631927	0.857711	0.236633	0.0418911	0.0430254	0.370763	0.495156	0.0401814	7	18	0.388889
KIAA1279	212453_at				0.000128451	0.0598355	0.0238603	0.425996	0.145653	0.00818654	0.949167	0.211841	0.0986327	0.0232999	0.623691	0.318921	0.11149	0.0340221	0.569918	0.0038341	0.986318	0.040145	7	18	0.388889
PTPRC	212587_s_at				0.343847	0.59411	0.313321	0.705734	0.173231	0.606191	0.0409195	0.228245	0.0441258	0.0723966	0.0583226	0.0822474	0.0197945	0.0182895	0.341654	0.00423245	0.00434786	0.0166429	7	18	0.388889
SNX4	212652_s_at				0.802283	0.0159001	0.407806	0.924608	0.191425	0.0270731	0.577466	0.147058	0.613501	0.828079	0.834728	0.75346	0.016386	0.0160058	0.0179609	0.00191827	0.902476	0.0264367	7	18	0.388889
HEG1	212822_at				0.0616011	0.0117841	0.331445	0.0789278	0.274002	0.531832	0.0162212	0.268847	0.0283074	0.197967	0.00170848	0.00158019	0.0427617	0.33902	0.65887	0.479941	0.908567	0.00953602	7	18	0.388889
APBB2	212985_at				0.00309714	0.647457	0.0404298	0.782755	0.519778	0.631329	0.635941	0.709308	0.140541	0.00557759	0.806268	0.217069	0.132708	0.0159119	0.00631259	0.025778	0.372601	0.0227211	7	18	0.388889
METTL18	213528_at				0.00285975	0.521744	0.856813	0.155372	0.220746	0.00453559	0.1079	0.798795	0.00145178	0.0111371	0.00993511	0.0119679	0.0945838	0.0703463	0.0225359	0.327825	0.953466	0.407386	7	18	0.388889
DDAH2	214909_s_at				0.421841	0.215503	0.180292	0.0841097	0.195728	0.00369324	0.715674	0.0944773	0.0391187	0.16141	0.0192332	0.194486	0.241886	0.00410425	5.59e-05	0.0442418	0.40831	0.0143456	7	18	0.388889
API5	214960_at				0.645263	0.725162	0.723013	0.0994997	0.110086	0.00134336	0.48169	0.620642	0.248547	0.207124	0.136307	0.13281	0.0162058	0.0167791	0.0276637	0.0234553	0.0127415	0.039494	7	18	0.388889
ERGIC3	216032_s_at				0.0974187	0.00605873	0.510747	0.802346	0.633919	0.0199708	0.492664	0.389386	0.00677175	0.226633	0.0519552	0.575588	0.592072	0.0157678	0.0349811	0.0146139	0.560477	0.0444246	7	18	0.388889
RP11-118B22.3	216384_x_at				0.022035	0.893946	0.27597	0.890105	0.0852179	0.316921	0.127318	0.811956	0.0192991	0.0385828	0.0219402	0.0147699	0.989139	0.0761172	0.00398665	0.038226	0.991482	0.385412	7	18	0.388889
RPS29P28	217131_at				0.88158	0.0240803	0.331506	0.178117	0.0318457	0.822161	0.330439	0.654369	0.00956404	0.854378	0.0379883	0.241443	0.739253	0.0360829	0.029465	0.621945	0.109441	0.0281391	7	18	0.388889
PIAS1	217864_s_at				0.00239116	0.88178	0.0500276	0.316891	0.099041	0.28535	0.00421574	0.0251071	0.0257266	0.0397678	0.595092	0.269022	0.45723	0.104696	0.727882	0.0238177	0.149991	0.0318973	7	18	0.388889
MAN1A2	217920_at				0.00422863	0.071787	0.0834392	0.0322232	0.170598	0.0218252	0.78661	0.886011	0.108973	0.127096	0.172099	0.468603	0.0251624	0.006713	0.00936192	0.396225	0.648493	0.00229165	7	18	0.388889
GTF3C3	218343_s_at				0.0444667	0.205197	0.102066	0.0188342	0.253149	0.016086	0.92381	0.175317	0.0666864	0.0389755	0.175431	0.115688	0.373005	0.0358743	0.0336231	0.000424366	0.430282	0.152871	7	18	0.388889
NUP37	218622_at				0.0126151	0.230807	0.742978	0.30665	0.781856	0.01073	0.409868	0.260903	0.0889728	0.000759818	0.658182	0.0625068	0.00986117	0.0137762	0.0806429	0.000521688	0.862141	0.0167004	7	18	0.388889
LYVE1	219059_s_at				0.471556	0.493741	0.257437	0.709694	0.612391	0.0789701	0.162409	0.0142366	0.328426	0.989834	0.311582	0.924932	0.0376733	0.0309499	0.0232578	0.013902	0.0232992	0.0140552	7	18	0.388889
DOCK10	219279_at				0.267533	0.00617152	0.246847	0.711018	0.265823	0.0242656	0.525043	0.315326	0.992625	0.0257091	0.929499	0.00651144	0.0234257	0.586731	0.629485	0.0401543	0.156479	0.0198185	7	18	0.388889
RWDD1	219598_s_at				2.86e-09	0.0765568	0.582635	0.551591	0.365751	0.0315523	0.167149	0.0699082	0.0153279	0.238526	0.0275034	0.215016	0.0160364	0.0892254	0.203246	0.0130556	0.772077	0.0294161	7	18	0.388889
FAR2	220615_s_at				0.0274464	0.836215	0.0453831	0.525514	0.327866	0.404902	0.169186	0.0229015	0.892427	0.0651061	0.996885	0.0457305	0.596372	0.295972	0.475467	0.0167337	0.000514687	0.0117427	7	18	0.388889
FAIM	220643_s_at				0.626164	0.0425809	0.333104	0.914903	0.0815821	0.0246599	0.0338382	0.267634	0.481351	0.827093	0.648167	0.165316	0.00115185	0.115933	0.0392541	0.0142598	0.0367332	0.173504	7	18	0.388889
DPP8	220939_s_at				0.00675843	0.302587	0.00822241	0.874574	0.67314	0.314767	0.00174475	0.0411209	0.104417	0.363279	0.203661	0.35279	0.317697	0.887036	0.318916	0.00473793	0.0245838	0.0383836	7	18	0.388889
ARHGAP25	38149_at	0.442073	0.821516	0.00323375	0.00054859	0.643379	0.0852849	0.0420336	0.452018	0.205436	0.188478	0.101014	0.418831	0.00873518	0.950713	0.147876	0.048571	0.000218935	0.0380142	0.0132102	0.140282	0.281302	8	21	0.380952
HS6ST3	1552842_at							0.826313	0.269193	0.702808	0.26938	0.182158	0.0438497	0.0279655	0.00250846	0.0302917	0.0503596	0.0231256	0.270298		0.153227	0.209237	5	14	0.357143
ITIH5	1553243_at							0.0787627	0.411298	0.861539	0.0845543	0.701378	0.0466619	0.0954703	0.0264484	0.0266332	0.971519	0.965921	0.662576		0.0177049	0.000339582	5	14	0.357143
ZNF555	1553286_at							0.213243	0.85753	0.0349409	0.044943	0.0263254	0.00023308	0.00186554	0.411463	0.95279	0.170151	0.15154	0.0804247		0.217848	0.875041	5	14	0.357143
CA8	1555445_at							0.37345	0.709381	0.941954	0.514813	0.135874	0.149588	0.0363382	0.0430281	0.00866617	0.715693	0.0293347	0.0194636		0.97741	0.880964	5	14	0.357143
MS4A4A	1555728_a_at							0.797751	0.316711	0.143196	0.600896	0.649644	0.516683	0.141737	0.492454	0.0801599	0.0154284	0.0063629	0.0064161		0.0130695	0.000404648	5	14	0.357143
PDSS2	1555886_at							0.799895	0.0199923	0.662921	0.0339833	0.0415298	0.102088	0.288897	0.19412	0.588512	0.0104861	0.0606686	0.00404139		0.665003	0.141917	5	14	0.357143
ADAM15	1555896_a_at							0.667919	0.829181	0.0384048	0.0340235	0.00925422	0.885439	0.966463	0.613596	0.786467	0.825434	0.0408424	0.0306789		0.777968	0.17326	5	14	0.357143
RP11-159G9.5	1556744_a_at							0.0304702	0.821432	0.0595201	0.00038277	0.182924	0.0414138	0.0249902	0.0965345	0.0151468	0.836994	0.867256	0.305858		0.697765	0.886639	5	14	0.357143
SHB	1557458_s_at							0.362099	0.562914	0.677254	0.822997	0.0128059	0.184853	0.0461412	0.856586	0.88545	0.0271202	0.0429063	0.0213341		0.0561047	0.0707335	5	14	0.357143
LRRC8C	1558517_s_at							0.381988	0.168485	0.00660744	0.539477	0.551656	0.894283	0.0222791	0.287342	0.00132439	0.0261198	0.148018	0.0212213		0.709477	0.15854	5	14	0.357143
NOC2L	1559139_at							0.263599	0.215873	0.00736935	0.201782	0.0421275	0.559464	0.86169	0.0200329	0.0445686	0.180167	0.81086	0.479062		0.950761	0.0185948	5	14	0.357143
XXyac-YR29IB3.1	1562107_at							0.779353	0.538218	0.172633	0.0239889	0.369144	0.327368	0.116578	0.0441811	0.0389638	0.277927	0.0468177	0.0416611		0.278316	0.0641204	5	14	0.357143
ELL	1565254_s_at							0.860899	0.0149595	0.117876	0.529521	0.334034	0.126079	0.418183	0.0217952	0.917905	0.602706	0.0130792	0.0458799		0.00880618	0.206248	5	14	0.357143
RP11-49I11.1	1568633_a_at							0.277595	0.558718	0.0106497	0.101478	0.664114	0.864616	0.81658	0.280667	0.0388949	0.213127	0.000764804	0.0348198		0.209083	0.0288136	5	14	0.357143
LIMA1	222457_s_at							0.593553	0.511759	0.0776108	0.022729	0.0364548	0.0113092	0.197074	0.0330137	0.376775	0.00655206	0.403968	0.122214		0.315904	0.198195	5	14	0.357143
DYNC1LI1	222479_s_at							0.0457938	0.320586	0.621163	0.205101	0.0495418	0.0497417	0.415735	0.126251	0.790662	0.0102323	0.656565	0.72275		0.428502	0.0136883	5	14	0.357143
ERMP1	222603_at							0.169589	0.145282	0.0145346	0.373003	0.811121	0.513239	0.768439	0.407726	0.149902	0.0186784	0.0441924	0.0397178		0.78346	0.00276403	5	14	0.357143
RIOK2	222663_at							0.992389	0.157803	0.000788933	0.0530053	0.75936	0.186702	0.0375848	0.12753	0.551994	0.0273828	0.00201608	0.00411809		0.123388	0.726253	5	14	0.357143
RP11-745O10.4	222845_x_at							0.27106	0.482134	0.750325	0.958112	0.13869	0.014442	0.010279	0.062817	0.0370764	0.0329302	0.0190581	0.118594		0.520976	0.186915	5	14	0.357143
CCDC113	222890_at							0.0367832	0.862129	0.65146	0.316773	0.0381826	0.756077	0.761765	0.827301	0.373619	0.214239	0.0159603	0.0382152		0.106913	0.0210655	5	14	0.357143
AKIRIN2	223144_s_at							0.529769	0.519357	0.0178198	0.00459615	0.104165	0.225594	0.344821	0.0294207	0.0236005	0.0756852	0.729304	0.397694		0.104188	0.0243995	5	14	0.357143
KCTD10	223208_at							0.0448646	0.280911	0.389084	0.578381	0.566773	0.0391595	0.0485639	0.0824791	0.017537	0.529153	0.448447	0.997289		0.0714441	0.0424562	5	14	0.357143
FERMT3	223303_at							0.378231	0.843725	0.000447678	0.0681342	0.900015	0.089297	0.132507	0.00370006	0.00365885	0.857707	0.726692	0.0500957		0.00428065	0.00056749	5	14	0.357143
ZNF416	223589_at							0.0417396	0.674452	0.815008	0.353081	0.499774	0.0106266	0.0149792	0.0305108	0.0284107	0.886832	0.402705	0.649271		0.0776668	0.234694	5	14	0.357143
RAD23B	223598_at							0.0356763	0.425415	0.252546	0.214307	0.967156	0.0357012	0.747296	0.0358747	0.813276	0.0168943	0.453133	0.537312		0.271961	0.0413745	5	14	0.357143
HCST	223640_at							0.618324	0.0369354	0.879805	0.922634	0.632128	0.0235793	0.512859	0.291941	0.327239	0.691294	0.0931226	0.0334996		0.00715244	0.00824767	5	14	0.357143
PTBP3	224617_at							0.196353	0.77929	0.5223	0.650965	0.584097	0.102791	0.100453	0.00744519	0.0258448	0.0415753	0.180866	0.506723		0.0357885	0.00164977	5	14	0.357143
CDK6	224851_at							0.136336	0.300432	0.845572	0.778502	0.477047	0.0209935	0.0223211	0.0172435	0.0458745	0.0436258	0.393618	0.780124		0.759179	0.54867	5	14	0.357143
C2orf15	224971_at							0.356577	0.26845	2.47e-05	0.0800476	0.707152	0.0455563	0.305954	0.734837	0.74384	0.00516125	0.0376084	0.0207465		0.634652	0.897494	5	14	0.357143
NFATC3	225141_at							0.232917	0.0249437	0.0421392	0.846112	0.291287	0.951574	0.584748	0.506411	0.365484	0.849764	0.0274261	0.0278631		0.398207	0.010208	5	14	0.357143
PDK4	225207_at							0.48308	0.844965	0.657311	0.369415	0.0218302	0.346147	0.818723	0.0665663	0.301772	0.310213	0.02607	0.0441281		0.0445024	0.00039021	5	14	0.357143
C1QC	225353_s_at							0.922286	0.79857	0.828459	0.361811	0.560242	0.000434926	0.38958	0.0112592	0.460328	0.57391	0.00343557	0.083104		0.00132026	0.023114	5	14	0.357143
C10orf54	225372_at							0.862618	0.891687	0.000573213	0.0134355	0.0122514	0.251186	0.0465218	0.766103	0.175615	0.421997	0.381631	0.260192		0.721539	0.00794992	5	14	0.357143
ZNF275	225382_at							0.300144	0.0655278	0.0360795	0.155194	0.194117	0.00189774	0.00956167	0.0213886	0.153652	0.670307	0.785857	0.417569		0.111369	0.021568	5	14	0.357143
LRRC58	225479_at							0.00284975	0.120723	0.000308358	0.418378	0.895538	0.540926	0.600056	0.90801	0.440437	0.0064798	0.02762	0.0172069		0.939807	0.435368	5	14	0.357143
BRI3BP	225716_at							0.0321899	0.0201748	0.00158043	0.14778	0.446242	0.233744	0.775047	0.473927	0.757821	0.00122535	0.227477	0.0467697		0.957187	0.976285	5	14	0.357143
C20orf194	225825_at							0.577954	0.0759204	0.0958382	0.390268	0.146846	0.0430018	0.644347	0.00368479	0.288889	0.00831171	0.568835	0.773304		0.0116804	0.043607	5	14	0.357143
HENMT1	225841_at							0.081318	0.181954	0.0213326	0.0254209	0.211359	0.011936	0.0271788	0.181329	0.44445	0.321593	0.829108	0.197971		0.0219118	0.124004	5	14	0.357143
PHLDA1	225842_at							0.821462	0.664144	0.324033	0.30735	0.761105	0.0330629	0.0329003	0.0152273	0.031161	0.430982	0.271022	0.229862		0.236989	0.0119707	5	14	0.357143
KIF21A	226003_at							0.0436273	0.404773	0.00758039	0.392889	0.91704	0.205804	0.422318	0.00467739	0.0266222	0.0368736	0.3719	0.291786		0.825994	0.611519	5	14	0.357143
MAP1B	226084_at							0.522007	0.000834836	0.60429	0.909636	0.630562	0.034358	0.482724	0.005493	0.163306	0.104635	0.333202	0.35411		0.0099466	0.00488151	5	14	0.357143
ZFHX3	226137_at							0.786631	0.0481512	0.572616	0.524276	0.600749	0.632953	0.734098	0.0344096	0.0818327	0.0050023	0.345467	0.317799		0.00340236	0.0010816	5	14	0.357143
DNM1L	226154_at							0.698627	0.419862	0.186374	0.590328	0.181406	0.738155	0.17239	0.302516	0.0456485	0.00924008	0.0298191	0.0172376		0.15606	0.0321819	5	14	0.357143
SLC18B1	226301_at							0.41429	0.111687	0.0255026	0.604284	0.890128	0.135906	0.0495799	0.874126	0.388675	0.264155	0.191627	0.0484711		0.0327406	0.00242916	5	14	0.357143
LACTB	226354_at							0.0453822	0.562527	0.659523	0.619764	0.244884	0.394486	0.721545	0.989372	0.55966	0.00389688	0.122643	0.018765		0.000702614	0.000366761	5	14	0.357143
SBK1	226548_at							0.81268	0.481116	0.309565	0.520305	0.149563	0.00518803	0.0175616	0.0132658	0.0247406	0.166708	0.499444	0.487009		0.623817	0.0145638	5	14	0.357143
NR2C2AP	226839_at							0.719096	0.0200881	0.969233	0.0266452	0.0223915	0.0828791	0.635788	0.310751	0.902689	0.765908	0.02693	0.0265913		0.506542	0.727408	5	14	0.357143
FAM63B	226873_at							0.165562	0.886091	0.0243873	0.681713	0.838744	0.0186993	0.476447	0.305087	0.720792	0.0161706	0.0359356	0.0270399		0.519323	0.249301	5	14	0.357143
CCDC136	226972_s_at							0.212764	0.0442364	0.313759	0.302145	0.0239798	0.0474191	0.394064	0.0147699	0.496238	0.516239	0.790572	0.913172		0.00398946	0.927538	5	14	0.357143
RASAL2	227036_at							0.121793	0.205062	0.116447	0.0878764	0.877896	0.679862	0.551739	0.00860457	0.0291718	0.0343765	0.00368205	0.0369121		0.588381	0.371679	5	14	0.357143
ZNF614	227045_at							0.0505788	0.430634	0.0140517	0.180297	0.734729	0.000573811	0.00762434	0.0462979	0.103122	0.0303553	0.433861	0.123483		0.97917	0.433778	5	14	0.357143
CUX1	227069_at							0.121925	0.482112	0.0418973	0.00415096	0.0160055	0.859401	0.510595	0.647639	0.699505	0.799053	0.0492984	0.179305		0.96741	0.0440318	5	14	0.357143
IKZF1	227346_at							0.952576	0.231503	0.0155821	0.936	0.960659	0.122628	0.0305607	0.450538	0.220845	0.0384447	0.814582	0.995074		0.0416272	0.00848184	5	14	0.357143
AC004383.4	227488_at							0.00868732	0.592439	0.181885	0.215671	0.450141	0.252212	0.528678	0.0220218	0.0424393	0.836334	0.00328718	0.0494326		0.0523657	0.323808	5	14	0.357143
ZNF75A	227670_at							0.411489	0.27339	0.089896	0.0472197	0.71592	0.0085763	0.0415066	0.302215	0.11544	0.449241	0.00492581	0.0361979		0.428725	0.386183	5	14	0.357143
RP11-835E18.2	228160_at							0.670728	0.0345984	0.0120442	0.902446	0.419866	0.839729	0.778526	0.326586	0.28526	0.926288	0.00215804	0.272198		0.041699	0.00924436	5	14	0.357143
ATP5G3	228168_at							0.923229	0.126893	0.0353728	0.396678	0.524413	0.0182496	0.712499	0.741635	0.0432563	0.0291233	0.0717287	0.00127192		0.319847	0.602646	5	14	0.357143
ZMAT3	228315_at							0.808961	0.51785	0.00757773	0.0317982	0.474546	0.0561925	0.754391	0.0460353	0.675102	0.00313403	0.35635	0.787237		0.149154	0.00461564	5	14	0.357143
ALPK3	228342_s_at							0.817411	0.348783	0.762151	0.275392	0.214023	0.00586071	0.823773	0.00850576	0.369903	0.446203	0.0691052	0.0352645		0.015067	0.0445731	5	14	0.357143
FNIP1	228768_at							0.894998	0.323003	0.047048	0.0271862	0.738422	0.729866	0.202729	0.833522	0.715491	0.0352121	0.0461788	0.208404		0.544388	0.0271328	5	14	0.357143
COBLL1	229598_at							0.0493607	0.0830638	0.785828	0.0358306	0.572339	0.0458423	0.661404	0.220677	0.863553	0.236545	0.027535	0.105894		0.0920322	0.0371385	5	14	0.357143
TAGAP	229723_at							0.221365	0.226317	0.568278	0.92748	0.389432	0.0126918	0.00245063	0.156645	0.0618032	0.0060851	0.0524331	0.0412271		0.0575038	0.00561789	5	14	0.357143
SLC45A1	230458_at							0.570939	0.522087	0.912502	0.0702489	0.484347	0.0268146	0.0199491	0.569755	0.935046	0.53631	0.0440817	0.00589193		0.62875	0.020571	5	14	0.357143
COL6A6	230867_at							0.123345	0.0200519	0.0418026	0.296232	0.850478	0.149468	0.562024	0.0365687	0.293668	0.454922	0.929404	0.872873		0.00129557	0.0424238	5	14	0.357143
SPG7	230885_at							0.958825	0.136818	0.461164	0.000798311	0.0173273	0.00448805	0.0357958	0.0274894	0.0863393	0.984578	0.807857	0.262275		0.840908	0.175181	5	14	0.357143
DMGDH	231790_at							0.487033	0.309833	0.00825564	0.0133985	0.00797426	0.0328189	0.35189	0.0346682	0.682393	0.131303	0.758714	0.3633		0.93142	0.0909826	5	14	0.357143
SDF4	232032_x_at							0.148591	0.0360886	0.0297203	0.00915793	0.0392902	0.164196	0.345788	0.464488	0.317187	0.22565	0.989006	0.409067		0.0137915	0.302847	5	14	0.357143
MS4A6A	232724_at							0.622418	0.295253	0.815483	0.893465	0.420675	0.00817923	0.0350662	0.0409078	0.212715	0.79048	0.0899514	0.0818333		0.0156892	0.00587144	5	14	0.357143
CMYA5	233520_s_at							0.0162982	0.653966	0.136371	0.0424708	0.0400058	0.881152	0.949083	0.549269	0.841372	0.01445	0.80365	0.903498		0.907179	0.0180755	5	14	0.357143
RP11-93O14.2	233864_s_at							0.420673	0.293032	0.0323005	0.0468232	0.168339	0.385181	0.0114252	0.410826	0.00938128	0.0094169	0.862799	0.520552		0.196176	0.457508	5	14	0.357143
SRGAP1	233888_s_at							0.28359	0.0440432	0.0401598	0.44427	0.938574	0.0970677	0.981965	0.0229506	0.203416	0.0647426	0.196583	0.551099		0.0390848	0.042789	5	14	0.357143
AC000111.3	234706_x_at							0.0771319	0.65214	0.033792	0.102791	0.0267292	0.554272	0.783721	0.0734598	0.2347	0.171728	0.00264419	0.00564864		0.700626	0.0304828	5	14	0.357143
AC018737.1	235132_at							0.14273	0.400375	0.0812321	0.741246	0.894862	0.256028	0.0282117	0.0032732	0.919627	0.0320744	0.0301422	0.25019		0.650895	0.0403305	5	14	0.357143
TMEM209	235158_at							0.826048	0.285918	0.12805	0.208709	0.767442	0.0040506	0.0112364	0.0671543	0.103607	0.0174756	0.0213508	0.0269551		0.973383	0.38977	5	14	0.357143
2013-03-01	235385_at							0.543491	0.0198825	0.575282	0.464563	0.550649	0.165469	0.0563796	0.313255	0.444488	0.000439905	0.392081	0.0419473		0.0136423	0.0181766	5	14	0.357143
ZNF805	235398_at							0.698436	0.834077	0.0467828	0.152944	0.447283	0.00238166	0.0276986	0.214326	0.757183	0.897823	0.0137552	0.00764104		0.349792	0.966698	5	14	0.357143
CAMK1D	235626_at							0.881164	0.0479277	0.897355	0.299804	0.618501	0.200325	0.104641	0.00209671	0.0114461	0.790451	0.0385109	0.0264888		0.743138	0.959611	5	14	0.357143
SAMHD1	235964_x_at							0.985912	0.22507	0.435771	0.732516	0.960587	0.00513705	0.0617911	0.00832114	0.0860378	0.0266949	0.34734	0.453511		0.0459258	0.00479454	5	14	0.357143
C4orf29	236240_at							0.774766	0.689915	0.00937602	0.185322	0.822635	9.97e-05	0.0365595	0.152023	0.895476	0.975508	0.0350384	0.00445576		0.205906	0.252679	5	14	0.357143
ZNF701	236589_at							0.201337	0.0181795	0.0110416	0.0219372	0.196248	0.0103644	0.125903	0.0118711	0.19427	0.170694	0.169476	0.203129		0.683468	0.17243	5	14	0.357143
RAP1GDS1	237856_at							0.52179	0.0785898	0.0198175	0.0604066	0.915911	0.0190114	0.440752	0.010835	0.351735	0.309631	0.0452817	0.642384		0.877252	0.0422114	5	14	0.357143
ZNF100	238791_at							0.551201	0.0382992	0.0134925	0.944178	0.869922	0.0189292	0.346045	0.0143308	0.325551	0.0385847	0.891318	0.964752		0.543567	0.270977	5	14	0.357143
PML	239582_at							0.402355	0.343807	0.655476	0.552273	0.0373343	0.847871	0.0434425	0.539645	0.00298022	0.332202	0.373364	0.0126904		0.240026	0.0107338	5	14	0.357143
RUNDC3B	241703_at							0.0492537	0.242017	0.622552	0.0489156	0.20119	0.245003	0.0446905	0.618809	0.226085	0.0173808	0.310256	0.149594		0.702381	0.0434327	5	14	0.357143
PHKB	242248_at							0.414321	0.142938	0.00366956	0.643764	0.668114	0.0390393	0.464565	0.00970855	0.210176	0.413528	0.0297329	0.092475		0.336572	0.00369776	5	14	0.357143
ZFHX3	242738_s_at							0.680211	0.24197	0.132365	0.336808	0.828116	0.0342449	0.376092	0.0274957	0.276594	0.0144423	0.814453	0.0969807		0.0404135	0.0302655	5	14	0.357143
SGMS2	242963_at							0.551584	0.447666	0.481716	0.541119	0.654712	0.0212034	0.00217261	0.0868846	0.00616337	0.606062	0.51855	0.0110526		0.0117331	0.249891	5	14	0.357143
GJC1	243502_at							0.030465	0.627874	0.202742	0.00806149	0.0248568	0.391888	0.0799477	0.0281977	0.420295	0.988714	0.064795	0.00475669		0.0820367	0.784193	5	14	0.357143
AC005162.4	243698_at							0.815266	0.71729	0.455001	0.676584	0.91238	0.0179239	0.579998	0.0259617	0.460321	0.376639	0.00520939	0.0190508		0.928006	0.0459788	5	14	0.357143
SLC25A3	200030_s_at				0.0348706	0.287179	0.721174	0.0323822	0.0386603	0.806534	0.234743	0.710991	0.838017	0.333005	0.211886	0.0683894	0.0670795	0.0245189	0.0134611	0.00351553	0.402522	0.641077	6	18	0.333333
RPL37	200092_s_at				0.000198693	0.883255	0.115702	0.229246	0.915736	0.197149	0.0919688	0.0136952	0.00258993	0.102566	0.0274755	0.179008	0.0339708	0.547799	0.55	0.852297	0.783518	0.00380003	6	18	0.333333
HSP90B1	200599_s_at				0.269777	0.306007	0.661019	0.818009	0.0943683	0.00884939	0.188239	0.976938	0.0297847	0.2167	0.000179146	0.00437596	0.0368776	0.789543	0.849752	0.0111694	0.429222	0.103471	6	18	0.333333
CALM1	200655_s_at				1.95e-05	0.0409892	0.488278	0.846613	0.538595	0.539098	0.0127103	0.0390523	0.21571	0.258929	0.137363	0.254992	0.228412	0.294432	0.0429621	0.0158374	0.162565	0.277756	6	18	0.333333
EPAS1	200878_at				0.618845	0.0319864	0.0473214	0.248382	0.599657	0.556063	0.533022	0.296019	0.907068	0.0129193	0.693542	0.0189375	0.114017	0.154733	0.0726574	0.0244231	0.648408	0.0322098	6	18	0.333333
IMMT	200955_at				0.0250426	0.629455	0.0212642	0.394125	0.607857	0.0124696	0.336077	0.244991	0.682336	0.87777	0.365706	0.364847	0.501169	0.0429991	0.0149669	0.00946774	0.542986	0.555075	6	18	0.333333
MDH1	200978_at				0.00338661	0.419612	0.00964178	0.623366	0.98313	0.0172513	0.44298	0.079582	0.161193	0.419296	0.801206	0.412568	0.203614	0.0303624	0.0321664	0.00858877	0.982209	0.943062	6	18	0.333333
RPN1	201011_at				0.000148591	0.890973	0.179682	0.703431	0.748696	0.202217	0.00277009	0.0961042	0.0202093	0.0456525	0.0786875	0.101299	0.88389	0.768831	0.344605	0.0192504	0.0295955	0.0784202	6	18	0.333333
PAICS	201013_s_at				0.915214	0.643773	0.112201	0.711796	0.485262	0.0541094	0.983218	0.382043	0.00425774	0.00370994	0.172958	0.117062	0.0158753	0.0101237	0.0391513	0.000795112	0.279944	0.624756	6	18	0.333333
CD99	201029_s_at				0.0202094	0.0664432	0.808245	0.0167892	0.699067	0.362909	0.416388	0.179974	0.0990088	0.744669	0.00876819	0.264357	0.814348	0.261899	0.574081	0.0301346	0.0107292	0.00124332	6	18	0.333333
PLD3	201050_at				0.000657495	0.00253536	0.28729	0.96058	0.247311	0.00968854	0.0112785	0.0289269	0.633231	0.693972	0.984938	0.950147	0.185703	0.212511	0.217242	0.340352	0.110093	0.0184814	6	18	0.333333
RRBP1	201204_s_at				0.580226	0.0174566	0.439774	0.723736	0.178194	0.023108	0.35226	0.581097	0.00578468	0.229717	0.000860085	0.0401808	0.536655	0.207714	0.435553	0.0302843	0.377813	0.334062	6	18	0.333333
2013-09-11	201307_at				0.30213	0.113551	0.0760149	0.271811	0.0625187	0.111164	0.510342	0.496937	0.121906	0.0222308	0.032678	0.00696365	0.0298535	0.893163	0.404246	0.00828984	0.0847395	0.00016037	6	18	0.333333
UBL3	201535_at				0.544113	0.0263525	0.108174	0.503994	0.427494	0.0322727	0.576108	0.0742792	0.63561	0.784362	0.790544	0.979414	0.0294253	0.0665042	0.0167454	0.00087884	0.691839	0.0164944	6	18	0.333333
ID2	201565_s_at				0.00043336	0.529973	0.179887	0.894854	0.286847	0.504565	0.261572	0.0319199	0.0388403	0.198955	0.00285616	0.157243	0.541466	0.0963134	0.155966	0.0166601	0.26165	0.0178731	6	18	0.333333
CYB5R3	201885_s_at				0.0111104	0.309144	0.347086	0.385225	0.754438	0.0285001	0.0272248	0.032104	0.0389261	0.716531	0.0892741	0.693823	0.72827	0.539742	0.0231794	0.913133	0.809892	0.801903	6	18	0.333333
SEC63	201916_s_at				0.376886	0.0488396	0.0289434	0.248055	0.230543	0.0022946	0.458314	0.416318	0.920075	0.814934	0.52397	0.65937	0.0302517	0.374549	0.149402	0.000288839	0.894355	0.0339857	6	18	0.333333
TRAK2	202125_s_at				0.0328836	0.193018	0.0827357	0.369499	0.125072	0.00703138	0.785752	0.369859	0.0350625	0.0759858	0.0300191	0.0367473	0.250443	0.227806	0.0586735	0.0375285	0.366342	0.269712	6	18	0.333333
SHFM1	202276_at				0.166479	0.977716	0.0446478	0.00739487	0.61226	0.0484691	0.560331	0.446225	0.0455276	0.692959	0.0315855	0.148237	0.021893	0.941416	0.275997	0.420921	0.583546	0.448636	6	18	0.333333
SREBF1	202308_at				0.00836585	0.0428449	0.109336	0.774618	0.0267034	0.753795	0.126821	0.629735	0.135283	0.425558	0.00222672	0.0250144	0.362335	0.0335933	0.402272	0.240747	0.627633	0.231499	6	18	0.333333
ITGAV	202351_at				0.0664741	0.0700301	0.108677	0.899658	0.146693	0.002821	0.480043	0.985468	0.703637	0.565449	0.0322607	0.0175969	0.0016536	0.213161	0.229566	0.0413046	0.103758	0.000988339	6	18	0.333333
DBI	202428_x_at				0.000366668	0.350766	0.366968	0.838189	0.222607	0.93619	0.00896209	0.0361595	0.0825693	0.798621	0.00932173	0.0466792	0.000276833	0.971084	0.995135	0.157977	0.745015	0.999095	6	18	0.333333
SPOCK2	202523_s_at				0.0176768	0.00751202	0.789022	0.121518	0.48058	0.0250586	0.0746445	0.174134	0.387636	0.579514	0.460503	0.294338	0.841392	0.011347	0.0301441	0.00420414	0.291884	0.133079	6	18	0.333333
LEPROTL1	202594_at				0.00682938	0.0464101	0.940484	0.813137	0.568254	0.0304833	0.55924	0.626127	0.834029	0.926725	0.00982061	0.0131344	0.169986	0.392059	0.206916	0.0494266	0.849599	0.788283	6	18	0.333333
LYN	202626_s_at				0.110993	0.179587	0.979755	0.00210179	0.867089	0.0227695	0.752881	0.321366	0.120309	0.0229988	0.381682	0.098491	0.0482594	0.45434	0.830929	0.430653	0.00195503	0.000685591	6	18	0.333333
TNFAIP3	202644_s_at				0.0054589	0.828768	0.520008	0.0270871	0.733393	0.360499	0.620788	0.723607	0.0214897	0.0964448	0.139954	0.316665	0.00188447	0.330441	0.314317	0.408901	0.0226758	0.0120637	6	18	0.333333
SLC39A7	202667_s_at				0.00684712	0.601994	0.307478	0.684266	0.712433	0.0981113	0.90439	0.32118	0.0115299	0.735647	0.00412296	0.101042	0.381298	0.807498	0.905003	0.00891594	0.0429007	0.0211691	6	18	0.333333
RASA1	202677_at				0.0362246	0.439187	0.0484948	0.476906	0.15081	0.0481884	0.567895	0.2205	0.0975394	0.763617	0.840107	0.468164	0.0246149	0.36909	0.0349351	0.0251921	0.858969	0.0717882	6	18	0.333333
CDC20	202870_s_at				0.268801	0.404932	0.556924	0.0150062	0.939939	0.530292	0.868463	0.567848	0.0203243	0.00365538	0.797267	0.722509	0.715217	0.0151619	0.110657	0.0372932	0.0108575	0.0917177	6	18	0.333333
CDC23	202892_at				0.0676069	0.167912	0.028447	0.33093	0.143157	0.0384511	0.672419	0.292421	0.26447	0.156927	0.385632	0.150174	0.0314943	0.0233235	0.0380245	0.0124069	0.437347	0.207122	6	18	0.333333
CTSS	202902_s_at				0.908426	0.121819	0.374666	0.798238	0.253504	0.273929	0.0403459	0.136012	0.284406	0.115851	0.2015	0.134919	0.047464	0.0145238	0.00770136	0.174046	0.00777531	0.000296008	6	18	0.333333
NBN	202907_s_at				0.458005	0.520069	0.0779294	0.341217	0.00595183	0.040857	0.156708	0.854043	0.447924	0.62657	0.76811	0.486913	0.0457179	0.0435776	0.0299779	0.00782356	0.96755	0.24147	6	18	0.333333
GCLC	202923_s_at				0.630594	0.945009	0.00704108	0.98938	0.571949	0.0126963	0.146808	0.514582	0.00027363	0.000363318	0.363128	0.417751	0.0143479	0.0241924	0.262238	0.110218	0.524587	0.695911	6	18	0.333333
SUCLA2	202930_s_at				0.946423	0.115099	0.0454144	0.620193	0.446762	0.00841449	0.663866	0.30444	0.66481	0.320192	0.419171	0.042907	0.0629512	0.0358787	0.0369751	0.001028	0.205562	0.762731	6	18	0.333333
ADAM12	202952_s_at				0.00418261	0.515398	0.883356	0.168299	0.33844	0.435541	0.505478	0.753064	0.0067537	0.853411	0.0027576	0.564017	0.0262629	0.601813	0.432929	0.141279	0.0169503	0.00113614	6	18	0.333333
STK10	203047_at				0.362948	0.0123295	0.0352702	0.14482	0.567643	0.0185432	0.75731	0.463958	0.735272	0.0186952	0.477308	0.0186881	0.455032	0.449797	0.0860884	0.52495	0.334557	0.0138421	6	18	0.333333
HS2ST1	203283_s_at				0.835078	0.209541	0.162531	0.0215266	0.324099	0.0364927	0.431333	0.50969	0.819169	0.741184	0.919557	0.870689	0.10016	0.0177265	0.0142641	0.0425403	0.14734	0.00935271	6	18	0.333333
NPRL3	203289_s_at				0.0499565	0.663655	0.255177	0.614683	0.595747	0.956516	0.00185921	0.00462497	0.00405949	0.072997	0.00731518	0.0328131	0.2465	0.189991	0.621237	0.068462	0.16104	0.0845567	6	18	0.333333
CDC40	203376_at				9.9e-05	0.0852635	0.142415	0.349244	0.288908	0.0219609	0.386676	0.118608	0.315704	0.0190582	0.368297	0.0208207	0.0479656	0.0927204	0.138358	6.05e-05	0.220583	0.636821	6	18	0.333333
STC2	203439_s_at				0.778952	0.019348	0.929134	0.0200802	0.636321	0.354816	0.935137	0.659591	0.00909529	0.0156329	0.235538	0.153826	0.0696794	0.342923	0.798307	0.443491	0.00198998	0.000840477	6	18	0.333333
ABCA1	203505_at				0.0306186	0.0782912	0.690366	0.973929	0.22976	0.523847	0.658994	0.435312	0.0160954	0.113445	0.00470584	0.0261161	0.00192154	0.030171	0.068531	0.0748105	0.220872	0.867286	6	18	0.333333
TNFRSF1B	203508_at				0.300513	0.0274962	0.561902	0.072627	0.918259	0.157463	0.0143419	0.0546797	0.00255031	0.00756925	0.116674	0.0707441	0.911878	0.334287	0.418047	0.0016503	0.0655936	0.032519	6	18	0.333333
LSP1	203523_at				0.00611741	0.0578436	0.193511	0.409412	0.0710518	0.00331124	0.0386397	0.293211	0.018495	0.649419	0.0115276	0.216789	0.700175	0.180743	0.288451	0.0118814	0.0756799	0.945116	6	18	0.333333
KLF9	203543_s_at				0.000188249	0.401542	0.351945	0.354437	0.690958	0.277994	0.848129	0.0842087	0.163451	0.0125165	0.641057	0.146047	0.0881954	0.0433846	0.041446	0.0115157	0.827792	0.0187892	6	18	0.333333
FCGR2A	203561_at				0.0751891	0.470741	0.0258536	0.849883	0.602154	0.0390193	0.350998	0.106906	0.37116	0.325562	0.797581	0.673293	0.424984	0.00808149	0.00926446	0.573632	0.00199346	0.00321971	6	18	0.333333
E2F3	203692_s_at				0.0368263	0.413632	0.0276403	0.671246	0.288774	0.137808	0.47301	0.789112	0.0171737	0.400038	0.00930811	0.0553544	0.347754	0.808229	0.329732	0.0191548	0.0981601	0.0233488	6	18	0.333333
FRZB	203698_s_at				0.00726153	0.471329	0.357505	0.645378	0.0881824	0.0545464	0.265114	0.89952	0.16266	0.045369	0.413242	0.354567	0.0740368	0.0452009	0.012039	0.682	0.0086199	0.0129406	6	18	0.333333
PCCA	203860_at				0.926666	0.256531	0.0347887	0.389576	0.190191	0.0187558	0.97079	0.762066	0.00768124	0.0150945	0.562056	0.747097	0.212016	0.0369032	0.0302145	0.152203	0.119932	0.483235	6	18	0.333333
PIK3CD	203879_at				0.703303	0.194355	0.242778	0.903795	0.482746	0.145802	0.213547	0.266879	0.0236664	0.0179234	0.124703	0.0488713	0.566774	0.317712	0.376332	0.0380922	0.010763	0.00111622	6	18	0.333333
AL162458.1	203936_s_at				0.0384173	0.456928	0.00303395	0.136688	0.425483	0.0865232	0.199865	0.225613	0.462957	0.580969	0.670863	0.652947	0.598042	0.0348219	0.00679959	0.907887	0.0104654	0.00566437	6	18	0.333333
HBA1	204018_x_at				0.121062	0.131176	0.0380393	0.0650575	0.534944	0.0160669	0.543489	0.0463303	0.250799	0.21715	0.0332775	0.025518	0.185861	0.00876875	0.076196	0.0508181	0.341009	0.348567	6	18	0.333333
CCL4	204103_at				0.959546	0.100095	0.255668	0.000697386	0.777467	0.201108	0.327887	0.39469	0.00882194	0.24705	0.143829	0.725228	0.0290841	0.131412	0.0441693	0.0140057	0.0824761	0.00592333	6	18	0.333333
ENPP4	204161_s_at				0.0156035	0.0923423	0.924715	0.849095	0.179282	0.0186537	0.87758	0.435704	0.525805	0.713916	0.43887	0.208524	0.00163102	0.0746024	0.04689	0.00897599	0.533378	0.00378899	6	18	0.333333
GULP1	204235_s_at				0.177566	0.589548	0.0800126	0.981571	0.0263783	0.796693	0.414772	0.840079	0.0108519	0.0209382	0.476317	0.46899	0.0291136	0.000139874	0.00734344	0.118898	0.676306	0.114961	6	18	0.333333
PMAIP1	204286_s_at				0.00954862	0.487172	0.127012	0.0961666	0.854451	0.377029	0.914166	0.934911	0.0100398	0.115714	0.00153235	0.034007	0.342825	0.324452	0.653446	0.051845	0.0101047	0.0420708	6	18	0.333333
AGA	204332_s_at				0.168883	0.284686	0.597757	0.00520105	0.735545	0.0180267	0.818139	0.311422	0.0853568	0.361033	0.0535182	0.105231	0.0411783	0.475838	0.276574	0.00865258	0.00538976	0.00638241	6	18	0.333333
RNF24	204669_s_at				0.00497158	0.196797	0.728573	0.477131	0.24845	0.00283958	0.623324	0.975564	0.000197321	0.04113	0.029431	0.259882	0.395774	0.304399	0.243193	0.0451753	0.766799	0.47442	6	18	0.333333
ZFYVE9	204893_s_at				0.0379595	0.0540151	0.0308369	0.611643	0.332919	0.78181	0.0883047	0.150049	0.0720422	0.235799	0.0290173	0.0487219	0.0142489	0.354286	0.255036	0.0306174	0.159943	0.543706	6	18	0.333333
AOC3	204894_s_at				0.00590702	0.879166	0.0954531	0.645412	0.57759	0.929863	0.42997	0.954603	0.241184	0.0425657	0.946757	0.0218053	0.0190608	0.96058	0.225648	0.00258875	0.0103533	0.549619	6	18	0.333333
PTGER4	204897_at				0.0203944	0.707586	0.335921	0.0096204	0.979017	0.141646	0.944514	0.478242	0.770423	0.844836	0.177887	0.407851	0.00733259	0.600646	0.472437	0.0424285	0.0364167	0.000100647	6	18	0.333333
ASNS	205047_s_at				0.580942	0.313461	0.0414965	0.512495	0.902247	0.0113951	0.68199	0.643412	0.000171309	0.029601	0.00324019	0.0917697	0.553435	0.703567	0.875876	0.00974482	0.220418	0.176494	6	18	0.333333
FPR1	205119_s_at				0.0166585	0.0956131	0.0119445	0.0165558	0.717421	0.00708501	0.970838	0.48117	0.181393	0.00944482	0.94615	0.245085	0.73428	0.613419	0.632339	0.0402513	0.187164	0.72542	6	18	0.333333
APOH	205216_s_at				0.844354	0.813626	0.251779	0.70307	0.98719	0.0673119	0.0748532	0.782861	0.109228	0.016713	0.369797	0.00762024	0.000945927	0.00214429	0.000924496	0.0302702	0.868634	0.205633	6	18	0.333333
DYNC1I1	205348_s_at				0.549991	0.965146	0.350638	0.824247	0.632799	0.126892	0.661825	0.776639	0.00631884	0.160418	0.00206399	0.0454426	0.503498	0.646012	0.988304	0.00342299	0.0366168	0.000802962	6	18	0.333333
PDGFA	205463_s_at				0.0201401	0.868368	0.0274114	0.754086	0.974294	0.971299	0.00307187	0.0217139	0.0184438	0.889812	0.0651466	0.442685	0.880984	0.198647	0.455716	0.608227	0.00168672	0.478737	6	18	0.333333
PPP1R1A	205478_at				0.798117	0.829764	0.657337	0.623493	0.685859	0.447298	0.0156956	0.0325681	0.0793544	0.658357	0.0181662	0.38098	0.0330149	0.117918	0.0175592	0.0465368	0.927498	0.654174	6	18	0.333333
ZNF222	206175_x_at				0.000191798	0.514643	0.341872	0.0405053	0.125964	0.873716	0.00131626	0.364728	0.0117911	0.0211611	0.279478	0.0253679	0.38211	0.569134	0.689245	0.390522	0.138146	0.666679	6	18	0.333333
VAV1	206219_s_at				0.617545	0.358356	0.0513524	0.315646	0.16689	0.163776	0.101056	0.871311	0.00269088	0.0229748	0.0314953	0.017079	0.277393	0.29476	0.207173	0.621812	0.00821398	0.00576571	6	18	0.333333
NTS	206291_at				0.0203034	0.835301	0.0946075	0.0405225	0.39695	0.00895707	0.77667	0.806043	0.00822699	0.207775	0.0838375	0.751248	0.445188	0.00960687	0.0410534	0.311911	0.488762	0.525314	6	18	0.333333
CCL13	206407_s_at				0.0714262	0.208759	0.169362	0.997403	0.042405	0.527161	0.648172	0.794923	0.91987	0.735513	0.79782	0.950235	0.358353	0.0120524	0.00425599	0.00900552	0.0108727	0.0192689	6	18	0.333333
NDRG2	206453_s_at				0.000564159	0.187021	0.716363	0.959103	0.51645	0.605327	0.0414024	0.162968	0.0845172	0.030076	0.0260705	0.0335664	0.562505	0.0954522	0.166639	0.977599	0.116319	0.0211256	6	18	0.333333
SLC35A3	206770_s_at				0.486512	0.0351165	0.0350931	0.417623	0.22451	0.0534993	0.719248	0.275942	0.690149	0.686843	0.515136	0.584425	0.0240478	0.0324216	0.116054	0.0104433	0.125922	0.0433829	6	18	0.333333
SCGB1D2	206799_at				0.0400477	0.966864	0.0106534	0.305882	0.522224	0.362604	0.382358	0.268415	0.0170649	0.00173136	0.759555	0.227412	0.142902	0.000369388	0.00219056	0.0842412	0.149513	0.141062	6	18	0.333333
PRKCA	206923_at				0.0149174	0.722448	0.452819	0.0338314	0.332069	0.0557924	0.759824	0.724643	0.0139988	0.203479	0.0621934	0.555714	0.00790956	0.46368	0.292675	0.0904977	0.0243301	0.00892339	6	18	0.333333
HS6ST1	206997_s_at				0.289363	0.0751455	0.016058	0.427588	0.142	0.9667	0.604534	0.380297	0.0373677	0.129422	0.00563664	0.0329109	0.726495	0.015372	0.122645	0.0378616	0.873614	0.187866	6	18	0.333333
LYZL6	207343_at				0.165067	0.433391	0.0029596	0.340938	0.192419	0.140146	0.740813	0.351506	0.879351	0.467514	0.242808	0.0010134	0.802026	0.0377322	0.0458499	0.0333817	0.610358	0.0143024	6	18	0.333333
GPR171	207651_at				0.00127873	0.80988	0.151384	0.86771	0.0894481	0.00262329	0.0273516	0.0815161	0.738131	0.0496499	0.0933307	0.661133	0.0350079	0.942478	0.985809	0.0377435	0.0520809	0.0695536	6	18	0.333333
DPT	207977_s_at				0.765497	0.877262	0.401158	0.225037	0.475587	0.891509	0.113261	0.0227222	0.296316	0.447496	0.290898	0.586096	0.0247828	0.0269214	0.0316402	0.0476852	0.0953034	0.0463614	6	18	0.333333
GTF2B	208066_s_at				0.00128958	0.248293	0.00695666	0.156708	0.884354	0.309476	0.800066	0.0409288	0.680281	0.0183384	0.968634	0.0492109	0.117248	0.473929	0.53277	0.00610792	0.915219	0.776103	6	18	0.333333
FKBP8	208255_s_at				0.0242226	0.0851942	0.56436	0.972297	0.0401728	0.717671	0.0141447	0.0370924	0.205556	0.503437	0.965238	0.92182	0.0148825	0.128697	0.133558	0.0414185	0.530029	0.507658	6	18	0.333333
FGR	208438_s_at				0.795228	0.180862	0.951942	0.040819	0.413033	0.00150896	0.77973	0.0233704	0.119549	0.0179967	0.912422	0.345247	0.503911	0.934891	0.708194	0.00817893	0.0564137	0.0245806	6	18	0.333333
RNF10	208632_at				0.00848808	0.403955	0.055285	0.351126	0.461486	0.442763	0.920805	0.510868	0.0216822	0.173375	0.0192069	0.0975046	0.00804111	0.8853	0.533684	0.245109	0.0144682	0.0216199	6	18	0.333333
ATXN10	208832_at				0.935086	0.261911	0.770781	0.009712	0.122932	0.0378294	0.705963	0.153653	0.0147144	0.104808	0.183545	0.744819	0.00885039	0.193981	0.196159	0.0497968	0.24777	0.0365813	6	18	0.333333
ATP1B3	208836_at				0.000365119	0.437566	0.430298	0.291726	0.545918	0.100551	0.888977	0.600204	0.00768879	0.0289104	0.0090678	0.0167487	0.0188124	0.477796	0.443679	0.0811468	0.470707	0.425907	6	18	0.333333
TMED3	208837_at				0.0737021	0.927796	0.250575	0.480486	0.340149	0.00700291	0.633755	0.812618	0.0114266	0.959296	0.0172253	0.992912	0.16853	0.0568994	0.00706165	0.00405316	0.0873549	0.0135568	6	18	0.333333
THY1	208850_s_at				0.467422	0.242583	0.0280398	0.517458	0.343509	0.209376	0.126498	0.363008	0.102373	0.411782	0.0180715	0.0213406	0.805679	0.00606329	0.023399	0.00642995	0.511184	0.127683	6	18	0.333333
DUSP6	208892_s_at				0.00117839	0.329864	0.763801	0.0390144	0.0607936	0.140931	0.789557	0.940689	0.02876	0.837024	0.0274174	0.688684	0.0276961	0.983169	0.768144	0.34692	0.96709	0.024998	6	18	0.333333
CYCS	208905_at				0.522569	0.169248	0.721736	0.577313	0.629198	0.0462838	0.918689	0.226151	0.300563	0.913243	0.526164	0.0493517	0.0265755	0.0471253	0.0164195	0.00678525	0.744696	0.355899	6	18	0.333333
STAT3	208991_at				0.00815868	0.944335	0.0477588	0.341731	0.891985	0.239047	0.00307414	0.00437256	0.626538	0.945085	0.922151	0.714854	0.29466	0.963287	0.648495	0.0757693	0.0121792	0.00102515	6	18	0.333333
STAT3	208992_s_at				0.00162328	0.717951	0.0817844	0.702768	0.747413	0.0168457	0.000646627	0.00335019	0.570343	0.331473	0.801599	0.380212	0.426739	0.0629468	0.16462	0.127004	0.0304161	0.0230019	6	18	0.333333
2013-09-08	208999_at				0.284671	0.745379	0.0235582	0.247948	0.36125	0.48822	0.199829	0.877243	0.350909	0.0277589	0.174475	0.00986447	0.0177349	0.0339588	0.506491	0.210824	0.312708	0.0232963	6	18	0.333333
TUBA1A	209118_s_at				0.00785786	0.140573	0.785362	0.0995777	0.525981	0.0955548	0.914994	0.864935	0.0182913	0.0293174	0.0143976	0.0598834	0.059377	0.155099	0.156163	0.711034	0.0171813	0.0188231	6	18	0.333333
ADCY6	209195_s_at				0.716862	0.314396	0.255416	0.826783	0.0103495	0.819051	0.0178115	0.161658	0.709824	0.129493	0.161404	0.00359362	0.00857961	0.416237	0.755917	0.00277562	0.932613	0.0481339	6	18	0.333333
STX3	209238_at				0.0174769	0.260214	0.012819	0.272316	0.243213	0.945868	0.258798	0.142334	0.426015	0.0864405	0.199696	0.0448032	0.4795	0.284719	0.116316	0.00654436	0.0392153	0.0169812	6	18	0.333333
AC019097.7	209259_s_at				0.393296	0.0812725	0.0497902	0.203481	0.250843	0.0361272	0.53661	0.647057	0.0471686	0.00784749	0.504547	0.227833	0.000929579	0.433229	0.237868	0.00106873	0.205384	0.16791	6	18	0.333333
FAM190B	209379_s_at				0.7639	0.138268	0.12895	0.696047	0.0908059	0.00835739	0.283384	0.992409	0.0238561	0.307635	0.00512295	0.101296	0.00654735	0.593042	0.728406	0.00257535	0.496692	0.0222097	6	18	0.333333
GGA3	209411_s_at				0.924887	0.696415	0.0198756	0.442477	0.0379895	0.143642	0.21341	0.0121933	0.139095	0.578066	0.0737284	0.373781	0.25859	0.0409275	0.0437864	0.0148293	0.425963	0.70023	6	18	0.333333
ARHGEF2	209435_s_at				0.500385	0.394311	0.154955	0.497696	0.283526	0.496826	0.368407	0.737993	0.00125727	0.00121552	0.00481782	0.0121604	0.00454223	0.843154	0.62616	0.02445	0.77141	0.60082	6	18	0.333333
CD36	209555_s_at				0.7526	0.144384	0.0259456	0.459216	0.0332604	0.00438765	0.466648	0.0505412	0.316478	0.369741	0.0705343	0.0450397	0.0874378	0.996003	0.548298	0.109443	0.0475675	0.013137	6	18	0.333333
INSIG2	209566_at				0.000290975	0.0285652	0.0478768	0.504801	0.424346	0.0121766	0.631967	0.396155	0.639613	0.681323	0.807331	0.984957	0.232167	0.692585	0.367295	0.037323	0.672265	0.000669704	6	18	0.333333
SRGAP3	209794_at				0.262632	0.300917	0.868137	0.00488098	0.0211686	0.212778	0.455791	0.423021	0.0917862	0.0401923	0.118527	0.0811339	0.374483	0.0248689	0.00972468	0.074937	0.148944	0.00087956	6	18	0.333333
SLIT2	209897_s_at				0.471619	0.0471311	0.597833	0.125959	0.139809	0.926339	0.888127	0.123754	0.186658	0.681453	0.720131	0.257016	0.541443	0.00681414	0.0381734	0.00240449	0.0114299	0.000293878	6	18	0.333333
SPAG6	210033_s_at				0.00766976	0.185039	0.746115	0.188969	0.201535	0.0024419	0.558868	0.0185815	0.544821	0.245523	0.571661	0.0217641	0.338622	0.0235369	0.0106824	0.170833	0.319602	0.09908	6	18	0.333333
FBXO9	210638_s_at				0.00446441	0.793368	0.104196	0.591621	0.477303	0.0118133	0.70199	0.0534484	0.0446539	0.00839683	0.0959983	0.0155387	0.738856	0.819214	0.911252	0.0224774	0.990155	0.0553659	6	18	0.333333
CLN3	210859_x_at				0.202097	0.18672	0.282919	0.93127	0.731283	0.00565215	0.0011625	0.00750201	0.265435	0.629793	0.906421	0.983283	0.220766	0.033811	0.146355	0.0387558	0.514519	0.0105014	6	18	0.333333
HMGB1P3	210985_s_at				0.031266	0.489217	0.765604	0.322254	0.523921	0.040412	0.0223249	0.895307	0.418068	0.0128896	0.349201	0.0287758	0.140631	0.918798	0.575601	0.00208654	0.500565	0.964061	6	18	0.333333
KITLG	211124_s_at				0.0231178	0.689909	0.0144649	0.207225	0.230066	0.650798	0.0112504	0.332061	0.0171257	0.466791	0.214938	0.581649	0.76387	0.0607988	0.0428124	0.0112809	0.910687	0.995232	6	18	0.333333
P2RX6	211147_s_at				0.684916	0.221109	0.0207067	0.127078	0.0259312	0.726591	0.218885	0.418944	0.157201	0.457943	0.0345817	0.231043	0.828524	0.032986	0.0168259	0.0179375	0.186022	0.174397	6	18	0.333333
CDK11A	211289_x_at				0.19782	0.454382	0.0150526	0.388324	0.257008	0.148128	0.118298	0.00342575	0.0494745	0.282537	0.0997763	0.710189	0.547203	0.00634546	0.0248223	0.397738	0.919091	0.000579162	6	18	0.333333
HBA1	211699_x_at				0.160207	0.111811	0.0389767	0.140718	0.474667	0.0134181	0.566134	0.0552943	0.239102	0.243972	0.0355996	0.0365825	0.154801	0.0167504	0.0877323	0.00557449	0.380295	0.357145	6	18	0.333333
RAB7A	211960_s_at				0.0225862	0.632279	0.00735139	0.34747	0.248182	0.494695	0.597787	0.369509	0.444429	0.218846	0.0485504	0.0209008	0.0243792	0.199483	0.0979998	0.0861581	0.174706	0.00991137	6	18	0.333333
KCTD12	212192_at				0.679132	0.452013	0.327672	0.429105	0.981761	0.448399	0.264466	0.633349	0.132559	0.0143193	0.0941949	0.00747504	0.0123107	0.0706839	0.0202485	0.040788	0.175205	0.0275426	6	18	0.333333
PSME4	212222_at				0.000295492	0.431841	0.0143449	0.762203	0.854821	0.0196334	0.916557	0.354499	0.439926	0.814372	0.00586621	0.0477853	0.367709	0.0766516	0.118466	0.000534854	0.318411	0.451391	6	18	0.333333
MTDH	212251_at				0.0115642	0.880186	0.773001	0.559824	0.0310446	0.610223	0.0249267	0.36012	0.000466063	0.319493	0.0135362	0.510527	0.00899692	0.815329	0.536033	0.977977	0.394304	0.343122	6	18	0.333333
SERPINB1	212268_at				0.334258	0.773764	0.0657444	0.0218909	0.816457	0.10361	0.939085	0.912242	0.387601	0.0257278	0.56297	0.229008	0.029102	0.225676	0.717104	0.0257403	0.0243086	0.00842783	6	18	0.333333
CLASP2	212306_at				0.0014331	0.293389	0.043356	0.471186	0.105758	4.62e-05	0.544705	0.169731	0.199241	0.00136448	0.85174	0.432107	0.392861	0.0744678	0.104179	0.0306447	0.996417	0.0213317	6	18	0.333333
CLASP2	212308_at				0.552383	0.597876	0.000855543	0.283879	0.152573	0.00902527	0.46554	0.360586	0.160124	0.100192	0.625472	0.439112	0.0566829	0.0124476	0.0493663	0.0449789	0.218476	0.0236126	6	18	0.333333
NUP210	212315_s_at				0.302713	0.661608	0.108445	0.956847	0.12038	0.438114	0.0433577	0.0146724	0.00857618	0.174355	0.0163883	0.25383	0.0495713	0.139142	0.287992	0.0415725	0.482499	0.33266	6	18	0.333333
TMEM131	212507_at				0.69718	0.435314	0.458948	0.492746	0.214015	0.782555	0.217302	0.170222	0.130125	0.0263376	0.743225	0.598275	0.0269929	2.86e-05	0.00249416	0.00801281	0.620837	0.0198462	6	18	0.333333
DLAT	212568_s_at				0.618245	0.209676	0.0842501	0.683538	0.107435	0.00155648	0.88591	0.176009	0.276565	0.111547	0.617056	0.0429066	0.00432213	0.0419392	0.00120895	0.0191715	0.881013	0.40732	6	18	0.333333
TMEM41B	212623_at				0.0126621	0.434188	0.397346	0.488397	0.0353012	0.0611573	0.298518	0.427238	0.154237	0.0608213	0.360983	0.187136	0.0295442	0.0395102	0.0389935	0.00135671	0.895719	0.0568173	6	18	0.333333
LHFPL2	212658_at				0.0871366	0.683289	0.627609	0.760445	0.671343	0.732393	0.969523	0.043977	0.0190077	0.781604	0.0624033	0.907297	0.0426426	0.0167015	0.0211263	0.0891801	0.179996	0.00183925	6	18	0.333333
MFAP4	212713_at				0.0413982	0.650158	0.719673	0.361678	0.766105	0.309192	0.309032	0.715964	0.833662	0.569191	0.824238	0.586197	0.18974	0.0058314	0.000745738	0.019072	0.0144704	0.0419742	6	18	0.333333
UBE2N	212751_at				0.0180661	0.167575	0.0580365	0.290962	0.0995843	0.105286	0.0335243	0.665674	0.609207	0.545331	0.962298	0.975291	0.0425891	0.0257131	0.00887669	0.00117191	0.513557	0.953117	6	18	0.333333
SOS1	212780_at				0.818384	0.123728	0.0958891	0.0321612	0.262865	0.0206034	0.727827	0.846765	0.0354181	0.497401	0.293617	0.149097	0.31345	0.102385	0.276888	0.0295923	0.0465413	0.00853388	6	18	0.333333
STX6	212799_at				0.018139	0.155227	0.019436	0.784024	0.0641726	0.315863	0.957357	0.35409	0.0597784	0.0419579	0.51261	0.0255488	0.0299966	0.292658	0.387125	0.0507864	0.0231717	0.746585	6	18	0.333333
RAB22A	213405_at				0.0172761	0.519896	0.0923574	0.809638	0.0307201	0.0155376	0.194253	0.968785	0.77772	0.65125	0.626941	0.876231	0.102381	0.427148	0.394002	0.011659	0.00806485	0.00105471	6	18	0.333333
APBB2	213419_at				0.521317	0.689126	0.0280036	0.883629	0.40277	0.932336	0.974299	0.432136	0.012626	0.000296784	0.311616	0.0334603	0.459955	0.00214192	0.0596095	0.175192	0.624385	0.0472477	6	18	0.333333
PPP1R7	213465_s_at				0.0109586	0.0916419	0.209139	0.527307	0.156023	0.00443323	0.684458	0.196649	0.0324559	0.0349258	0.823454	0.669039	0.420689	0.882234	0.609216	5.5e-05	0.651015	0.0447131	6	18	0.333333
ACOX1	213501_at				0.0301818	0.148029	0.0929406	0.766336	0.708229	0.83731	0.49173	0.163879	0.00206518	0.00229357	0.92743	0.620817	0.234589	0.00086136	0.0123197	0.0273064	0.0555624	0.254962	6	18	0.333333
RNASE6	213566_at				0.355194	0.36093	0.164198	0.600095	0.103143	0.20476	0.55493	0.326052	0.0160887	0.173356	0.0988662	0.581292	0.0215536	0.08192	0.0118175	0.0138953	0.00176736	0.000828724	6	18	0.333333
RAC2	213603_s_at				0.464535	0.112077	0.0374639	0.355188	0.298598	0.0042461	0.770053	0.176336	0.168758	0.0238221	0.536629	0.234262	0.169768	0.660557	0.938625	0.00804574	0.00421833	0.0053151	6	18	0.333333
AC006483.1	213867_x_at				0.251544	0.547726	0.176157	0.0417897	0.854994	0.00142085	0.372482	0.684377	0.246747	0.253402	0.165222	0.203961	0.221548	0.019537	0.0117251	0.764255	0.04687	0.0272835	6	18	0.333333
RP11-120B7.1	214003_x_at				0.0177369	0.94362	0.915582	0.752579	0.726232	0.0162753	0.365618	0.682151	0.00229589	0.336111	0.0411789	0.291293	0.624438	0.931172	0.716614	0.888897	0.00635102	0.0100033	6	18	0.333333
FTH1	214211_at				0.00987261	0.0683243	0.308597	0.549357	0.422798	0.00657412	0.610834	0.59059	0.559743	0.620406	0.581574	0.525264	0.0360379	0.00409754	0.0499742	0.0660505	0.0554423	0.0183731	6	18	0.333333
HBA1	214414_x_at				0.133991	0.156569	0.0232663	0.203225	0.360287	0.0178617	0.66455	0.300797	0.158639	0.0616378	0.0141766	0.00326657	0.453847	0.0416146	0.263545	0.0473148	0.637425	0.374549	6	18	0.333333
PAM	214620_x_at				0.202138	0.813752	0.246789	0.64431	0.197086	0.0501231	0.068996	0.00867264	0.0253006	0.150627	0.913121	0.652208	0.0414071	0.0458632	0.421843	0.00210832	0.158997	0.00339738	6	18	0.333333
CCNB1	214710_s_at				0.614714	0.600164	0.0733409	0.617864	0.0357068	0.372435	0.983938	0.623088	0.0198339	0.0766457	0.015605	0.0348061	0.518752	0.369447	0.00930642	0.272858	0.0905471	0.00153147	6	18	0.333333
BTF3	214800_x_at				0.00830886	0.313919	0.345705	0.507312	0.928925	0.0474969	0.0354562	0.475125	0.253994	0.952231	0.0223196	0.308015	0.0267503	0.17074	0.640671	0.13293	0.0380547	0.662619	6	18	0.333333
FAM69A	216044_x_at				0.0382039	0.0280115	0.0131225	0.487758	0.660187	0.00277223	0.520132	0.707715	0.880049	0.922075	0.788172	0.776156	0.185523	0.677287	0.470892	0.0226484	0.0726245	0.00485158	6	18	0.333333
RP13-362E11.2	216315_x_at				0.0015329	0.38198	0.223168	0.782938	0.896304	0.397318	0.037156	0.89424	0.337234	0.727791	0.168052	0.904871	0.00731529	0.292423	0.621395	0.0112227	0.0266926	0.0222844	6	18	0.333333
SPN	216981_x_at				0.0246295	0.555353	0.357671	0.153851	0.169737	0.0166618	0.755101	0.821984	0.0837801	0.388115	0.0125481	0.262867	0.837817	0.00342881	0.0421113	0.0394281	0.343838	0.193132	6	18	0.333333
ST20	217104_at				0.0439511	0.962496	0.241042	0.268096	0.0217959	0.822061	0.0162272	0.592074	0.00221397	0.0341308	0.23233	0.994889	0.522729	0.0533887	0.134771	0.0176478	0.210082	0.803599	6	18	0.333333
HBB	217232_x_at				0.0433673	0.145036	0.0319464	0.0613007	0.129038	0.0152349	0.604166	0.127549	0.366381	0.0795871	0.0498214	0.00443637	0.574221	0.00580496	0.360095	0.15477	0.216987	0.289941	6	18	0.333333
CACNA1S	217515_s_at				0.666974	0.641583	0.00216179	0.288995	0.360812	0.114637	0.30488	0.535052	0.0400974	0.685773	0.0418923	0.792147	0.362394	0.359584	0.0333885	0.020372	0.438939	0.00257765	6	18	0.333333
ADIPOR1	217748_at				0.0429954	0.859002	0.540742	0.474325	0.240468	0.697169	0.119418	0.416517	0.543477	0.0341744	0.385458	0.00309222	0.0465249	0.908088	0.702851	0.0406307	0.216452	0.0159887	6	18	0.333333
PTCD3	217895_at				0.0400646	0.742622	0.368001	0.136133	0.562936	0.0092973	0.866556	0.538614	0.000727382	0.0756644	0.275403	0.981365	0.845811	0.0140396	0.043904	0.00129629	0.83459	0.377941	6	18	0.333333
FAM192A	217896_s_at				0.357357	0.00514397	0.0732043	0.646014	0.00845037	0.722463	0.198706	0.972469	0.0357194	0.0160938	0.0540343	0.0421788	0.00979383	0.312141	0.0683446	0.129929	0.158573	0.0623085	6	18	0.333333
FAM49B	217916_s_at				0.0271856	0.717498	0.518417	0.00600604	0.104673	0.535858	0.0486636	0.514665	0.94063	0.759576	0.581434	0.692235	0.0471996	0.0763467	0.0376345	0.00370221	0.758542	0.271768	6	18	0.333333
BTBD1	217945_at				0.00404441	0.0330881	0.0895573	0.932789	0.510929	0.00254112	0.385524	0.76171	0.224852	0.661352	0.0206537	0.0945066	0.000285775	0.268873	0.272295	0.0263545	0.568122	0.497569	6	18	0.333333
RBM47	218035_s_at				0.000498902	0.0248001	0.00836378	0.957969	0.736075	0.723979	0.272753	0.0760856	0.130532	0.116838	0.00910196	0.10277	0.629823	0.196394	0.732334	0.119017	0.0172366	0.00145845	6	18	0.333333
GGNBP2	218079_s_at				0.0307088	0.824543	0.0493687	0.976722	0.0225771	0.0112104	0.215629	0.625011	0.299402	0.0164271	0.851417	0.143267	0.158767	0.495547	0.574116	0.00921761	0.477287	0.159947	6	18	0.333333
ARFGEF2	218098_at				0.74301	0.193357	0.010508	0.411658	0.0426201	0.0200667	0.339598	0.253436	0.117563	0.554811	0.418711	0.245111	0.0267589	0.518573	0.179928	0.000968886	0.176469	0.0409215	6	18	0.333333
NIF3L1	218133_s_at				0.000543558	0.911803	0.107639	0.781775	0.530942	0.0024096	0.284348	0.313604	0.454789	0.072864	0.78498	0.214155	0.0335619	0.00593361	0.0185702	0.00332214	0.141036	0.0891898	6	18	0.333333
OSTM1	218196_at				0.748385	0.0372594	0.375184	0.214479	0.155873	0.0697753	0.704626	0.819044	0.323872	0.771105	0.00190904	0.0188037	0.0361754	0.244804	0.270523	0.00187898	0.31926	0.0207205	6	18	0.333333
RHOT1	218323_at				0.760907	0.108771	0.0495439	0.00397972	0.0414305	0.375517	0.171701	0.855631	0.57816	0.72118	0.311642	0.476472	0.0106624	0.317172	0.241618	0.0292189	0.0239979	0.957374	6	18	0.333333
SESN1	218346_s_at				0.0029235	0.246077	0.063633	0.608724	0.993404	0.366569	0.581329	0.0197191	0.207468	0.0221393	0.736773	0.294353	0.0628988	0.649889	0.114784	0.00977234	0.00225377	0.000799039	6	18	0.333333
S100PBP	218370_s_at				0.0361407	0.506815	0.0320578	0.199745	0.379998	0.00270514	0.89378	0.196369	0.430917	0.886918	0.83427	0.643794	0.667522	0.00978312	0.0204417	0.0149087	0.366659	0.0761117	6	18	0.333333
TMEM14A	218477_at				0.747521	0.256074	0.0393884	0.0279458	0.918028	0.0444341	0.420284	0.689732	0.216896	0.197857	0.355089	0.577203	0.0766988	0.919821	0.588514	0.0175805	0.0187788	0.0208185	6	18	0.333333
RIOK2	218535_s_at				0.000656709	0.314666	0.403932	0.8286	0.200436	0.00193999	0.146483	0.628958	0.103146	0.0265182	0.772884	0.140459	0.0176389	0.14884	0.0244896	0.00171728	0.319174	0.471963	6	18	0.333333
POGLUT1	218587_s_at				0.000157373	0.947338	0.354125	0.906438	0.459896	0.00110574	0.526164	0.0205312	0.124436	0.727401	0.1339	0.23916	0.660144	0.0897988	0.0497716	0.0777891	0.0067525	0.0220091	6	18	0.333333
ABHD10	218633_x_at				0.023479	0.144873	0.0446497	0.629841	0.00808412	0.0154835	0.927962	0.354448	0.925187	0.743176	0.936004	0.727666	0.538878	0.105101	0.0236134	0.00918719	0.929307	0.129653	6	18	0.333333
SEC22A	218703_at				0.065536	0.157049	0.0366278	0.319968	0.0483223	0.0032979	0.681823	0.908818	0.171065	0.907279	0.217661	0.89601	0.0404626	0.00927924	0.0166807	0.222209	0.0759008	0.162308	6	18	0.333333
CTBS	218924_s_at				0.679888	0.357686	0.750013	0.888645	0.889716	0.630196	0.867905	0.268933	0.0746249	0.0114216	0.517627	0.174833	0.00354685	0.020501	0.0261689	0.0236163	0.209053	0.0376212	6	18	0.333333
CROCCP3	219139_s_at				0.0130761	0.699105	0.950121	0.336189	0.852755	0.312273	0.255656	0.971503	0.0068194	0.271156	0.0473957	0.341046	0.00836574	0.0781943	0.945462	0.0103249	0.922069	0.0241773	6	18	0.333333
UBTD1	219172_at				0.255471	0.429955	0.0205212	0.110118	0.360983	0.0261111	0.167661	0.630919	0.0269838	0.680004	0.0289398	0.225555	0.839267	0.0203366	0.0891632	0.00588297	0.205757	0.0732119	6	18	0.333333
DNAJB14	219237_s_at				0.0307231	0.25394	0.288814	0.471125	0.0226601	0.000665799	0.242809	0.525832	0.434595	0.380572	0.0265494	0.0982977	0.00614275	0.243947	0.27261	0.0152568	0.229386	0.0546585	6	18	0.333333
CAAP1	219276_x_at				0.660948	0.0181387	0.131804	0.495852	0.0429365	0.0603703	0.143232	0.5166	0.885562	0.573963	0.398459	0.196455	0.0371598	0.113116	0.0374313	0.00427894	0.00748119	0.148973	6	18	0.333333
MTERFD1	219363_s_at				0.0126983	0.730776	0.266233	0.582051	0.96304	0.00292007	0.799671	0.458669	0.0305749	0.311975	0.659151	0.937355	0.420055	0.00733545	0.0227842	0.0177388	0.716101	0.62244	6	18	0.333333
SLC47A1	219525_at				0.865912	0.640024	0.724356	0.441552	0.0566916	0.0346371	0.504836	0.40978	0.0371879	0.196164	0.827725	0.726595	0.287675	0.0423694	0.0336545	0.00674191	0.243563	0.0350443	6	18	0.333333
KCTD14	219545_at				0.00858796	0.36174	0.907351	0.016534	0.497136	0.0255994	0.281756	0.964294	0.245479	0.567304	0.533902	0.798712	0.66891	0.00331491	0.000858229	0.294406	0.874878	0.00711642	6	18	0.333333
MS4A6A	219666_at				0.158091	0.325634	0.919656	0.961715	0.10303	0.620512	0.304534	0.228166	0.029244	0.559337	0.0863505	0.690592	0.250755	0.0286677	0.0111907	0.0482572	0.00199204	0.00398827	6	18	0.333333
NOX4	219773_at				0.0450438	0.560913	0.0779541	0.136797	0.634417	0.483386	0.745334	0.739795	0.0982896	0.0403645	0.339088	0.00793114	0.0423694	0.627218	0.608234	0.0339835	0.0897048	0.0323994	6	18	0.333333
MCOLN1	219952_s_at				0.16591	0.779807	0.291394	0.752938	0.112225	0.0163613	0.0175811	0.706546	0.0566704	0.957246	0.0377857	0.715084	0.0375572	0.232673	0.375684	0.00598277	0.00756866	0.924919	6	18	0.333333
P2RY13	220005_at				0.0102014	0.178167	0.0616729	0.36243	0.122808	0.587434	0.411095	0.390203	0.0468067	0.0271483	0.392804	0.0864644	0.0217506	0.363116	0.176555	0.0179795	0.00804411	0.131426	6	18	0.333333
TMEM176B	220532_s_at				0.484381	0.0300982	0.281584	0.573303	0.0799953	0.512938	0.155918	0.0457449	0.920173	0.330944	0.750071	0.293273	0.795354	0.0022576	0.00754442	0.200028	0.0197224	0.00106938	6	18	0.333333
CSNK1G3	220768_s_at				0.0323631	0.0484845	0.0882681	0.840335	0.944974	0.200705	0.940562	0.913196	0.0647675	0.0992594	0.0586607	0.304409	0.000715971	0.0148526	0.045083	0.00846088	0.359781	0.503284	6	18	0.333333
CTNNA3	220815_at				0.873299	0.573239	0.101843	0.686575	0.423093	0.0452915	0.0410835	0.701719	0.0150639	0.483379	0.391252	0.649554	0.428952	0.0372129	0.0284248	0.0252801	0.68753	0.11547	6	18	0.333333
VMP1	220990_s_at				0.0348048	0.965515	0.0203042	0.125409	0.543493	0.628883	0.86279	0.534006	0.937155	0.873147	0.697373	0.655275	0.0485987	0.894399	0.304555	0.0102467	0.032495	0.0321624	6	18	0.333333
TRMT61B	221229_s_at				0.860233	0.128667	0.0235127	0.441225	0.024153	0.106892	0.979912	0.366278	0.00193513	0.206045	0.0887036	0.504631	0.13123	0.0059227	0.00389192	0.0159622	0.644065	0.940119	6	18	0.333333
KCNMA1	221584_s_at				0.212371	0.00779466	0.579425	0.669289	0.214241	0.792205	0.953703	0.1749	0.00215533	0.236852	0.0545674	0.486115	0.102088	0.0114713	0.0599327	0.00562719	0.0212232	0.00110807	6	18	0.333333
ALDH6A1	221588_x_at				0.278864	0.709987	0.584481	0.0109197	0.896136	0.589655	0.160052	0.491169	0.0057783	0.0394727	0.085457	0.264399	0.849296	0.00122449	0.101049	0.0309183	0.0129802	0.262051	6	18	0.333333
ALDH6A1	221589_s_at				0.00456048	0.266188	0.788738	0.141985	0.298649	0.0656155	0.209699	0.891463	0.0165371	0.0260647	0.0996928	0.13127	0.723376	0.000620758	0.0398498	0.108296	0.0092115	0.791954	6	18	0.333333
PYCARD	221666_s_at				0.0832538	0.220264	0.0192161	0.571597	0.785001	0.00140673	0.662681	0.974388	0.230943	0.323106	0.457181	0.709663	0.689485	0.00238063	0.0452858	0.202047	0.00123567	0.00817855	6	18	0.333333
ACSBG2	221716_s_at				0.485645	0.389967	0.0331998	0.199817	0.63111	0.732577	0.399028	0.78045	0.575806	0.195317	0.0327492	0.026402	0.570618	0.0140797	0.0255837	0.0320142	0.433116	0.0643615	6	18	0.333333
C6orf120	221787_at				0.00383115	0.0705805	0.140414	0.0285372	0.247777	0.0757686	0.887776	0.421972	0.827501	0.893027	0.915313	0.915429	0.107155	0.0381467	0.0917344	0.00734178	0.0350703	0.00978626	6	18	0.333333
C19orf42	221988_at				0.0348759	0.754219	0.0651346	0.0262607	0.489255	0.116593	0.596665	0.662625	0.961913	0.0964476	0.661226	0.0198428	0.508181	0.00156682	0.00331075	0.00213144	0.474942	0.304303	6	18	0.333333
DBNDD1	222234_s_at				0.962715	0.368749	0.272074	0.0402278	0.28541	0.565476	0.88388	0.261354	0.0172682	0.0266803	0.00584357	0.00516989	0.861032	0.000390449	0.0542468	0.0532485	0.847599	0.128227	6	18	0.333333
PPP3CC	32541_at	0.79707	0.0873404	0.00686239	0.12265	0.0430818	0.0345717	0.324366	0.358297	0.0696006	0.697675	0.154809	0.36101	0.74794	0.149418	0.356509	0.110858	0.0412411	0.0670195	0.0361023	0.00859657	0.00343449	7	21	0.333333
STK19	36019_at	0.971857	0.128176	0.0148976	0.259349	0.9873	0.0250989	0.96653	0.020077	0.0226555	0.247363	0.542629	0.0170561	0.672296	0.00776284	0.169425	0.939969	0.177661	0.011292	0.563581	0.320821	0.06032	7	21	0.333333
PRR5	47069_at				0.00555124	0.320424	0.0876357	0.915573	0.0147704	0.735868	0.654037	0.783077	0.0237958	0.0178938	0.0205498	0.0261052	0.609195	0.373751	0.135659	0.280565	0.895027	0.250165	6	18	0.333333
DOCK6	55583_at				0.585021	0.00771732	0.0349779	0.432	0.26643	0.446312	0.0127726	0.538273	0.247151	0.0244202	0.635912	0.0462151	0.407639	0.538945	0.592963	0.0126804	0.610982	0.261911	6	18	0.333333
EXOSC4	91684_g_at				0.0574582	0.861151	0.0672382	0.4471	0.618814	0.00304699	0.244699	0.0166908	0.386076	0.30888	0.0124615	0.968896	0.249811	0.0481859	0.0454585	0.558094	0.535371	0.0427866	6	18	0.333333
DCAF15	91952_at				0.000212648	0.0443427	0.0188805	0.531412	0.786191	0.00558749	0.089953	0.929531	0.19799	0.465697	0.298446	0.382633	0.25504	0.0272024	0.0147048	0.101271	0.221868	0.190269	6	18	0.333333
MSANTD3	1552277_a_at							0.335449	0.0848408	0.22724	0.429753	0.735836	0.142451	0.792742	0.0319435	0.0458098	0.0236778	0.437325	0.341086		0.357113	0.000899455	4	14	0.285714
CRYZL1	1552347_at							0.149608	0.41061	0.0183657	0.381532	0.393626	0.0123686	0.747925	0.15708	0.625394	0.786805	0.0260523	0.031864		0.294936	0.912009	4	14	0.285714
GAPT	1552386_at							0.322333	0.0332658	0.417741	0.145528	0.417553	0.376465	0.0418986	0.269468	0.00606235	0.741724	0.808909	0.778109		0.287122	0.0253915	4	14	0.285714
CD300LG	1552509_a_at							0.0469001	0.865575	0.292801	0.440827	0.492013	0.418923	0.0381545	0.362393	0.150043	0.980084	0.283619	0.0853276		0.0115192	0.0187065	4	14	0.285714
SRCAP	1552630_a_at							0.28258	0.0157491	0.0511326	0.321953	0.159916	0.895815	0.805011	0.321695	0.00364914	0.0430466	0.089848	0.438765		0.519637	0.0178299	4	14	0.285714
ZNF626	1552643_at							0.738731	0.0271605	0.0491614	0.349883	0.336441	0.645826	0.0428823	0.716796	0.244726	0.113401	0.387319	0.0136523		0.346485	0.59312	4	14	0.285714
CASKIN1	1552689_at							0.765481	0.992011	0.479294	0.00787975	0.63826	0.448567	0.124813	0.312909	0.0106039	0.0670981	0.000626593	0.00602758		0.304666	0.249733	4	14	0.285714
HS6ST2	1552767_a_at							0.276555	0.343052	0.963904	0.631612	0.92121	0.00509716	0.0447538	0.0236392	0.100108	0.760734	0.605324	0.0907578		0.867179	0.0326752	4	14	0.285714
HELB	1552788_a_at							0.971368	0.0465695	0.00061424	0.394005	0.701608	0.982252	0.125958	0.466416	0.032081	0.487785	0.194824	0.235337		0.18446	0.012064	4	14	0.285714
THEM4	1553118_at							0.142472	0.00770724	0.279938	0.732549	0.00624997	0.0406239	0.0471146	0.336045	0.218352	0.121162	0.509567	0.985447		0.908772	0.682126	4	14	0.285714
BTNL9	1553279_at							0.484335	0.0901217	0.0241392	0.850344	0.633468	0.779479	0.0239738	0.89021	0.0082112	0.14023	0.807459	0.773569		0.0635236	0.0107807	4	14	0.285714
ANKRD23	1553366_s_at							0.445299	0.139365	0.600705	0.013934	0.00291863	0.0370421	0.686019	0.0721431	0.997512	0.243064	0.133431	0.0387223		0.795573	0.0818886	4	14	0.285714
PARP15	1553380_at							0.457455	0.860216	0.0275753	0.562645	0.840652	0.0443021	0.300598	0.0148534	0.0645478	0.00738897	0.610646	0.784678		0.421404	0.207198	4	14	0.285714
NLRP14	1553523_at							0.959972	0.149387	0.683248	0.478578	0.535264	0.0254382	0.324087	0.894777	0.365364	0.731559	0.0499222	0.0255559		0.0212708	0.485389	4	14	0.285714
HTRA4	1553706_at							0.276122	0.302636	0.147319	0.407044	0.847125	0.398224	0.730462	0.53853	0.805542	0.942211	0.0251252	0.00956909		0.0197281	0.00971247	4	14	0.285714
CYP1B1-AS1	1553829_at							0.784841	0.924486	0.544308	0.0278643	0.495033	0.0141579	0.181105	0.0196561	0.0639807	0.98268	0.24757	0.0113921		0.219863	0.258619	4	14	0.285714
ADAT3	1553968_a_at							0.933902	0.877797	0.040428	0.0431724	0.223343	0.949604	0.627408	0.313796	0.228948	0.386024	0.264186	0.166368		0.0483814	0.02267	4	14	0.285714
C20orf141	1554042_s_at							0.632769	0.948853	0.490363	0.938506	0.413451	0.0244364	0.0128558	0.164112	0.232712	0.487987	0.025819	0.00471838		0.805974	0.713991	4	14	0.285714
NOL9	1554082_a_at							0.63339	0.382414	0.0137796	0.374257	0.554807	0.750398	0.0327557	0.186434	0.785933	0.420769	0.654761	0.737501		0.0108372	0.0132091	4	14	0.285714
ULK2	1554112_a_at							0.305992	0.0313325	0.664137	0.00232659	0.0191021	0.750454	0.436207	0.822934	0.399287	0.82845	0.957705	0.223795		0.0684091	0.00600094	4	14	0.285714
SLC4A8	1554113_a_at							0.880654	0.213025	0.0470413	0.0814068	0.720057	0.441985	0.690195	0.0330027	0.485508	0.860031	0.0121676	0.00789794		0.417111	0.299509	4	14	0.285714
TTBK2	1554295_x_at							0.241302	0.624469	0.0479055	0.346629	0.137491	0.0325779	0.0139099	0.177548	0.0801611	0.345058	0.849263	0.739855		0.0490526	0.262015	4	14	0.285714
LINS	1554455_at							0.0471991	0.165041	0.000107687	0.149456	0.637068	0.265068	0.587819	0.94518	0.513308	0.146123	0.0453651	0.0449023		0.978111	0.275668	4	14	0.285714
CEP70	1554489_a_at							0.0113766	0.111244	0.560542	0.852902	0.909904	0.740576	0.626753	0.438603	0.281923	0.00187547	0.00759458	0.0372358		0.216618	0.0756071	4	14	0.285714
VSTM2A	1554530_at							0.0130742	0.230486	0.011551	0.0412836	0.784373	0.371275	0.831404	0.735261	0.848222	0.265371	0.204812	0.00476054		0.308156	0.235189	4	14	0.285714
TTC30B	1554588_a_at							0.390979	0.208079	0.857097	0.998656	0.245611	0.275365	0.697198	0.418935	0.996283	0.010745	0.314702	0.0365265		0.0199406	0.0129186	4	14	0.285714
ARHGAP27	1554594_at							0.110156	0.969291	0.00783728	0.087932	0.412664	0.607514	0.639112	0.982134	0.82455	0.560899	0.00504212	0.0032791		0.0358302	0.184792	4	14	0.285714
CMTM4	1554677_s_at							0.721401	0.0421371	0.0337316	0.630122	0.952062	0.899441	0.424815	0.889628	0.160124	0.165272	0.00538423	0.000380395		0.713446	0.261151	4	14	0.285714
OTUD7B	1555139_a_at							0.129813	0.29829	0.845963	0.0419134	0.354254	0.26572	0.861542	0.425051	0.765588	0.715532	0.0449571	0.00745747		0.0105261	0.158207	4	14	0.285714
PPP1R1C	1555462_at							0.926784	0.979649	0.762079	0.54937	0.612521	0.0428216	0.0282399	0.472822	0.352877	0.430412	0.0153298	0.00749929		0.510001	0.533034	4	14	0.285714
PACS2	1555823_at							0.549101	0.196409	0.0186378	0.0796757	0.235105	0.00855962	0.185461	0.00460421	0.159599	0.457925	0.394483	0.0420286		0.864823	0.326495	4	14	0.285714
PDHA1	1555864_s_at							0.54945	0.0347549	0.0106152	0.81457	0.626684	0.435895	0.421982	0.140519	0.0178171	0.168664	0.118305	0.02439		0.452877	0.59873	4	14	0.285714
RPP30	1556061_at							0.487174	0.193914	0.044152	0.618133	0.814512	0.744303	0.502561	0.963175	0.649863	0.0427409	0.0171097	0.039625		0.677192	0.280675	4	14	0.285714
RP11-480A16.1	1556103_at							0.547941	0.953773	0.631846	0.407164	0.24889	0.0113004	0.128779	0.265709	0.854708	0.0449137	0.00235932	0.000928639		0.509282	0.878732	4	14	0.285714
COTL1	1556346_at							0.44483	0.607154	0.371947	0.0301399	0.72006	0.525632	0.758124	0.707248	0.290322	0.499594	0.0266377	0.100577		0.0212569	0.0493109	4	14	0.285714
PVR	1556582_at							0.162789	0.850899	0.0268232	0.71737	0.436255	0.290504	0.342285	0.0225908	0.0546213	0.904693	0.00732432	0.0427187		0.615375	0.346407	4	14	0.285714
CTD-2006K23.1	1556748_x_at							0.767172	0.670672	0.034373	0.890847	0.499135	0.1675	0.851796	0.7145	0.962668	0.877133	0.0824932	0.0127895		0.0371817	0.0435818	4	14	0.285714
RP5-1166H10.2	1557557_at							0.0351944	0.655652	0.963578	0.551539	0.854165	0.988518	0.00431685	0.832381	0.00892027	0.975152	0.000918751	0.087397		0.157423	0.705265	4	14	0.285714
AL096869.5	1557657_a_at							0.175379	0.377828	0.792464	0.0296021	0.800194	0.0161694	0.0378779	0.0122632	0.203453	0.516275	0.474745	0.871612		0.838208	0.225444	4	14	0.285714
TXLNG	1557954_at							0.00014075	0.00833437	0.0225527	0.53239	0.289709	0.802513	0.612923	0.731214	0.785639	0.75693	0.509969	0.432368		0.7542	0.0156147	4	14	0.285714
TBC1D16	1558066_s_at							0.2023	0.658769	0.0137301	0.0296813	0.282149	0.263229	0.377691	0.503058	0.166789	0.233684	0.00730649	0.00497474		0.525485	0.741764	4	14	0.285714
LUZP1	1558173_a_at							0.655491	0.0255961	0.0359913	0.0538995	0.576813	0.239957	0.126142	0.0598749	0.058759	0.00964087	0.956783	0.0383991		0.718988	0.975308	4	14	0.285714
AP006222.2	1558529_s_at							0.00940338	0.000250168	0.0376366	0.327412	0.266772	0.467914	0.466853	0.741411	0.808873	0.526549	0.273067	0.0264111		0.473666	0.926417	4	14	0.285714
LSAMP-AS3	1558601_at							0.0479277	0.45882	0.828419	0.921	0.177275	0.0293653	0.824637	0.327201	0.248837	0.187325	0.00492077	0.0510505		0.631485	0.0458685	4	14	0.285714
ATAD2B	1558807_at							0.021697	0.953744	0.913345	0.248723	0.0482488	0.108716	0.18049	0.144729	0.0080019	0.576639	0.461088	0.179955		0.0476619	0.747877	4	14	0.285714
SIRPB2	1559034_at							0.788418	0.140449	0.374358	0.67519	0.125631	0.15406	0.00106218	0.0438265	0.00975619	0.897034	0.0282929	0.0683914		0.0946021	0.369795	4	14	0.285714
AC135178.1	1559045_at							0.073978	0.641088	0.725713	0.67813	0.113369	0.00207807	0.0306811	0.0103733	0.0563555	0.294947	0.157485	0.0523051		0.0124146	0.200483	4	14	0.285714
GPR12	1559603_at							0.689534	0.771877	0.672635	0.0693277	0.786516	0.0258735	0.435987	0.475664	0.72834	0.0419484	0.0346639	0.0182795		0.133958	0.0685172	4	14	0.285714
RP11-611D20.2	1559765_a_at							0.580844	0.514539	0.166541	0.23302	0.838641	0.0350761	0.775376	0.00210415	0.00302923	0.341782	0.0708118	0.255168		0.379864	0.0259209	4	14	0.285714
ZNF12	1559881_s_at							0.266086	0.150852	0.0415942	0.656941	0.0245594	0.00236323	0.506982	0.0257283	0.517469	0.132605	0.516568	0.438958		0.240447	0.0739838	4	14	0.285714
CBR3-AS1	1559917_a_at							0.163772	0.76958	0.0419272	0.366107	0.175646	0.490612	0.403102	0.00710566	0.740759	0.531229	0.335364	0.0222285		0.927149	0.0277012	4	14	0.285714
AC097658.1	1560382_at							0.235429	0.552338	0.0413118	0.165421	0.200944	0.690174	0.366136	0.382502	0.275499	0.483937	0.00109004	0.00142643		0.0686858	0.0328092	4	14	0.285714
LINGO3	1560439_at							0.34889	0.579277	0.0122494	0.674385	0.800099	0.860639	0.409461	0.660097	0.154396	0.696457	0.00977172	0.000629791		0.293544	0.0125789	4	14	0.285714
RP11-554A11.6	1560496_at							0.028736	0.528717	0.712029	0.114264	0.133767	0.0481661	0.435717	0.0260642	0.218491	0.341045	0.23977	0.0184132		0.398586	0.105946	4	14	0.285714
PRDX5	1560587_s_at							0.361993	0.356575	0.0089037	0.0475889	0.12595	0.00882211	0.270017	0.00297625	0.0982776	0.0731359	0.763233	0.460527		0.788854	0.0796714	4	14	0.285714
XCR1	1561226_at							0.0189395	0.640611	0.228365	0.435829	0.68757	0.0113436	0.183297	0.00549082	0.0456054	0.345651	0.826356	0.813866		0.709773	0.0959903	4	14	0.285714
RP11-933H2.4	1561348_at							0.212656	0.474538	0.401304	0.623979	0.0490934	0.0399435	0.73027	0.193223	0.0390075	0.49548	0.285719	0.0101174		0.495005	0.629138	4	14	0.285714
FAM41AY1	1561390_at							0.239985	0.810411	0.654393	0.592999	0.995188	0.910864	0.277156	0.500355	0.0267076	0.904171	0.0666068	0.0272496		0.0289821	0.028697	4	14	0.285714
RP11-125M16.1	1561565_at							0.274654	0.0224798	0.284799	0.500349	0.0623723	0.400413	0.0140162	0.251273	0.0239749	0.0176475	0.576761	0.883123		0.342875	0.809861	4	14	0.285714
ZNF391	1562446_at							0.590587	0.946487	0.810105	0.056159	0.352528	0.0182545	0.359991	0.0136841	0.313843	0.0358104	0.633059	0.842303		0.0365898	0.295935	4	14	0.285714
FCRL2	1563674_at							0.109752	0.557751	0.178603	0.55376	0.289518	0.00477538	0.0232226	0.00813192	0.00936026	0.213467	0.874607	0.877719		0.960311	0.696542	4	14	0.285714
RP11-276H1.3	1564327_at							0.254565	0.238727	0.133157	0.729556	0.274191	0.0415279	0.0313706	0.0247653	0.0224489	0.631448	0.791412	0.55035		0.6187	0.325248	4	14	0.285714
CCDC168	1566665_at							0.266329	0.710403	0.693245	0.913882	0.00816053	0.0983606	0.0277377	0.122841	0.00247231	0.332622	0.15524	0.138261		0.0426488	0.485047	4	14	0.285714
TPM4	1567107_s_at							0.679391	0.266736	0.782179	0.516584	0.0824953	0.430241	0.327294	0.328435	0.197446	0.92723	0.0138487	0.0114475		0.0358079	0.0261712	4	14	0.285714
GALNT1	1568618_a_at							0.577622	0.21754	0.148556	0.0728406	0.194528	0.0289333	0.348826	0.0209101	0.285926	0.146584	0.945013	0.206851		0.01087	0.0334332	4	14	0.285714
TDRD3	1569069_s_at							0.303499	0.419861	0.000123199	0.0308504	0.477069	0.471735	0.137006	0.270197	0.0474547	0.492566	0.0204343	0.0568456		0.558033	0.0529477	4	14	0.285714
C9orf169	1569144_a_at							0.314167	0.0391046	0.73709	0.88768	0.68142	0.581547	0.486566	0.127457	0.234014	0.282109	0.0416642	0.02751		0.639169	0.0498563	4	14	0.285714
CXCL2	1569203_at							0.0145593	0.678656	0.0244596	0.541901	0.876412	0.782438	0.890706	0.286418	0.838331	0.0711733	0.0777079	0.0348192		0.981678	0.0400675	4	14	0.285714
RP11-171A24.2	1569858_at							0.897981	0.862489	0.447562	0.829776	0.995402	0.00826505	0.263584	0.00470671	0.0874588	0.825045	0.00804645	0.233297		0.0350089	0.055368	4	14	0.285714
DOCK5	1570078_a_at							0.0394614	0.723051	0.377354	0.424369	0.34371	0.152297	0.591324	0.242078	0.814895	0.0578619	0.0073752	0.0138489		0.0197742	0.43676	4	14	0.285714
CSMD2	1570169_at							0.944831	0.717985	0.0144796	0.542439	0.405783	0.034401	0.276518	0.00384278	0.0751845	0.831113	0.0161229	0.12358		0.3689	0.341736	4	14	0.285714
NDFIP1	222423_at							0.0224551	0.527627	0.0260411	0.755382	0.656683	0.235446	0.824969	0.21468	0.865217	0.0354344	0.503851	0.451028		0.271955	0.0381663	4	14	0.285714
CHMP3	222436_s_at							0.673627	0.312215	0.685217	0.00722898	0.0324323	0.561014	0.946359	0.513135	0.60982	0.0180093	0.72155	0.46412		0.743845	0.0105698	4	14	0.285714
ARL8B	222442_s_at							0.370457	0.0189952	0.627013	0.613271	0.454912	0.124787	0.0178549	0.884614	0.990845	0.0281528	0.220838	0.449595		0.412053	0.0155863	4	14	0.285714
AP000892.1	222463_s_at							0.188413	0.137279	0.0280966	0.964081	0.570017	0.0113874	0.352569	0.0323618	0.458157	0.370809	0.106344	0.0555062		0.340582	0.0406025	4	14	0.285714
VPS36	222478_at							0.219352	0.0429122	0.000189042	0.853676	0.824286	6.52e-05	0.00286912	0.276132	0.31046	0.181598	0.0507954	0.302691		0.45478	0.12962	4	14	0.285714
NMD3	222497_x_at							0.947907	0.583229	0.00728028	0.736404	0.259052	0.0124804	0.072161	0.510081	0.658057	0.0405561	0.0609072	0.0327197		0.144417	0.915755	4	14	0.285714
SUV420H1	222566_at							0.306715	0.703412	0.0395419	0.214326	0.131545	0.0152272	0.00688458	0.2037	0.0910504	0.850348	0.0673602	0.0295897		0.559146	0.349425	4	14	0.285714
UGGT1	222569_at							0.908796	0.263655	0.587856	0.353102	0.989515	0.355983	0.533938	0.0389016	0.116752	0.033612	0.530163	0.897203		0.0369669	0.0238694	4	14	0.285714
XPR1	222581_at							0.101858	0.820382	0.169751	0.1237	0.0189886	0.555025	0.131256	0.195354	0.0269364	0.454024	0.5915	0.648566		0.0200633	0.0311779	4	14	0.285714
NLK	222589_at							0.62899	0.990175	0.0121184	0.825723	0.375313	0.270007	0.834961	0.377881	0.99987	0.0177221	0.627501	0.68548		0.0304423	0.00558829	4	14	0.285714
GTF3C3	222604_at							0.315449	0.125465	0.00265753	0.32869	0.508322	0.000620729	0.0147277	0.0522107	0.109796	0.0796231	0.100857	0.0453135		0.0671641	0.209323	4	14	0.285714
TBL1XR1	222633_at							0.820943	0.0459361	0.00193632	0.00264761	0.354043	0.126063	0.908352	0.0710738	0.930977	0.01132	0.349691	0.966835		0.163157	0.122086	4	14	0.285714
TRPS1	222651_s_at							0.214552	0.197874	0.00780668	0.496232	0.999803	0.02656	0.612578	0.0400597	0.392388	0.776253	0.626449	0.39536		0.797446	0.0162889	4	14	0.285714
IMPAD1	222654_at							0.627308	0.425811	0.0151007	0.618737	0.69094	0.672299	0.468001	0.275978	0.561793	0.0487595	0.256166	0.374019		0.0386828	0.0157758	4	14	0.285714
IPO11	222659_at							0.437302	0.340418	0.611435	0.468391	0.303392	0.00206143	0.0490664	0.00630859	0.0561719	0.152811	0.825924	0.498027		0.208128	0.0235724	4	14	0.285714
ASH1L	222667_s_at							0.321667	0.0213875	0.00704973	0.00855245	0.0806461	0.139725	0.445633	0.0450347	0.213506	0.602763	0.434498	0.998706		0.805581	0.098858	4	14	0.285714
TAF1D	222728_s_at							0.29976	0.0486823	0.601162	0.403872	0.497799	0.00222716	0.382538	0.00303564	0.366271	0.03264	0.336518	0.666495		0.221764	0.827301	4	14	0.285714
WWC2	222738_at							0.0420379	0.124224	0.00290047	0.457856	0.959218	0.0725352	0.455028	0.689869	0.466151	0.0159567	0.875595	0.971655		0.682012	0.0155623	4	14	0.285714
RASAL2	222810_s_at							0.134062	0.00537953	0.0318717	0.774647	0.311618	0.287889	0.53168	0.0167665	0.0436651	0.610882	0.0826482	0.614516		0.630568	0.65554	4	14	0.285714
DAPP1	222858_s_at							0.41393	0.436684	0.648925	0.306522	0.169317	0.00506372	0.00782655	0.0321686	0.0659655	0.774942	0.855349	0.101558		0.0327035	0.179282	4	14	0.285714
BCL11B	222895_s_at							0.393767	0.0138455	0.0211181	0.0396103	0.669073	0.0871168	0.024416	0.269224	0.119916	0.147544	0.612037	0.670278		0.112355	0.207701	4	14	0.285714
SLC40A1	223044_at							0.415837	0.895706	0.814471	0.199791	0.0800155	0.840564	0.550236	0.232705	0.745495	0.0219241	0.00150616	0.032352		0.071485	0.0264192	4	14	0.285714
ECHDC1	223087_at							0.919888	0.411808	0.00186226	0.121792	0.648844	0.0666444	0.194658	0.740011	0.556917	0.00524442	0.036167	0.0298194		0.835246	0.567497	4	14	0.285714
BBX	223134_at							0.587273	0.0289721	0.77878	0.212318	0.531514	0.0532993	0.86841	0.040306	0.940702	0.00221232	0.261874	0.619735		0.782013	0.00580347	4	14	0.285714
AKIRIN2	223145_s_at							0.190437	0.987457	0.0098913	0.0247729	0.245445	0.948185	0.0937219	0.0675858	0.571572	0.146179	0.244987	0.048188		0.389319	0.00424253	4	14	0.285714
NEK6	223159_s_at							0.103732	0.361704	0.0519735	0.618346	0.179041	0.000811507	0.0816037	0.0181161	0.119433	0.534555	0.924058	0.381993		0.00228074	0.000233652	4	14	0.285714
TIMM21	223180_s_at							0.226541	0.13918	0.0272959	0.444151	0.345759	0.782462	0.354775	0.477991	0.0545769	0.00194116	0.0161269	0.00932626		0.710572	0.781688	4	14	0.285714
SMARCAD1	223197_s_at							0.0475091	0.152151	0.00905918	0.369197	0.124539	0.413287	0.430676	0.524386	0.484726	0.454728	0.0223497	0.000972031		0.990734	0.115408	4	14	0.285714
STRBP	223245_at							0.552045	0.650323	0.0702308	0.21121	0.906576	0.0375519	0.108563	0.0099737	0.0208418	0.627346	0.888354	0.419684		0.894695	0.0497309	4	14	0.285714
KLHL7	223250_at							0.0406669	0.96314	0.000521426	0.819306	0.236791	0.0924983	0.161093	0.521035	0.595528	0.014563	0.125003	0.016413		0.592326	0.182372	4	14	0.285714
ORMDL3	223259_at							0.499933	0.99631	0.366854	0.676775	0.425105	0.00190424	0.065138	0.00196671	0.0335541	0.378726	0.385092	0.231104		0.0235441	0.149948	4	14	0.285714
RG9MTD1	223267_at							0.242005	0.520119	0.0375441	0.960266	0.866696	0.00692592	0.0376835	0.394985	0.407725	0.367696	0.125673	0.016443		0.713935	0.866387	4	14	0.285714
MS4A6A	223280_x_at							0.78319	0.672973	0.506341	0.675366	0.0299688	0.523971	0.731694	0.788378	0.996991	0.0338023	0.0770354	0.0701168		0.00253215	0.000973885	4	14	0.285714
MS4A7	223343_at							0.839601	0.895713	0.192897	0.582597	0.283575	0.0474317	0.139575	0.0650411	0.181106	0.0525835	0.0470857	0.0981425		0.00939062	9.78e-06	4	14	0.285714
FAM118B	223386_at							0.0397577	0.094765	0.0499769	0.339623	0.439325	0.514893	0.351326	0.229723	0.835681	0.0571927	0.686543	0.548378		0.040448	0.041508	4	14	0.285714
SGPP1	223391_at							0.649214	0.195195	0.00703701	0.864989	0.539892	0.197934	0.54385	0.138852	0.240702	0.00185569	0.583319	0.512042		0.0468446	0.0208925	4	14	0.285714
NPL	223405_at							0.657163	0.294631	0.753841	0.302128	0.0216156	0.737032	0.508569	0.136915	0.422814	0.0427573	0.501249	0.295261		0.0209424	9.64e-05	4	14	0.285714
DNAJC14	223420_at							0.583111	0.49995	0.671796	0.0484588	0.627919	0.49143	0.699996	0.837793	0.548368	0.0316644	0.194942	0.239361		0.00235964	0.00605099	4	14	0.285714
PPARA	223437_at							0.900005	0.245465	0.230725	0.0157459	0.268818	0.0289409	0.146826	0.900948	0.974407	0.562718	0.00351578	0.0381221		0.0525806	0.239454	4	14	0.285714
CAMKK1	223460_at							0.619265	0.902275	0.280217	0.240311	0.00743689	0.869896	0.815156	0.743077	0.76152	0.332685	0.0197374	0.0324904		0.256006	0.00437433	4	14	0.285714
IRF2BPL	223474_at							0.420114	0.881863	0.0288618	0.134781	0.0329816	0.104955	0.290415	0.081696	0.30585	0.0324136	0.788711	0.964513		0.0553392	0.0080788	4	14	0.285714
FBXO4	223493_at							0.903351	0.224723	0.0198861	0.982889	0.926787	0.455181	0.0338102	0.17455	0.00560085	0.0412234	0.0910407	0.547675		0.802451	0.126234	4	14	0.285714
COQ3	223515_s_at							0.832621	0.00895169	0.0424973	0.661072	0.417808	0.489571	0.493695	0.825144	0.353354	0.173784	0.0246805	0.000663318		0.473225	0.170905	4	14	0.285714
INIP	223559_s_at							0.404521	0.34427	0.262873	0.941412	0.285608	0.596794	0.269865	0.79904	0.250708	0.0088561	0.0752745	0.0245438		0.0454463	0.0440164	4	14	0.285714
ZNF577	223581_at							0.673267	0.095073	0.0143668	0.588953	0.609635	0.00750321	0.724681	0.0112182	0.497839	0.477352	0.0809079	0.0159284		0.729174	0.169789	4	14	0.285714
TRIM6	223599_at							0.518744	0.085317	0.411105	0.366123	0.437988	0.0337948	0.330426	0.00506748	0.434735	0.146923	0.86925	0.6995		0.017027	0.00114866	4	14	0.285714
TRIM7	223694_at							0.782799	0.380984	0.00399292	0.16135	0.102383	0.0033154	0.188866	0.0158619	0.568134	0.160746	0.359586	0.533265		0.0165005	0.0868	4	14	0.285714
RPL27A	223707_at							0.0311815	0.732419	0.930823	0.609466	0.727195	0.00762513	0.0328624	0.0706967	0.214727	0.242716	0.960681	0.905081		0.023441	0.750499	4	14	0.285714
PGM2	223738_s_at							0.787739	0.413299	0.201028	0.714769	0.809961	0.00796508	0.000306798	0.0652982	0.0141578	0.0419928	0.0612432	0.229372		0.105638	0.282025	4	14	0.285714
MS4A6A	223922_x_at							0.806699	0.645543	0.340843	0.568279	0.123459	0.178373	0.712882	0.106915	0.859292	0.0431946	0.0493393	0.0580384		0.00200875	0.00129702	4	14	0.285714
PCDHB9	223927_at							0.975829	0.191139	0.0384928	0.840182	0.453576	0.0374828	0.30232	0.0053204	0.0400821	0.324868	0.902375	0.107127		0.333675	0.702948	4	14	0.285714
LMBR1	224036_s_at							0.620516	0.673709	0.0095087	0.0698598	0.37903	0.610686	0.00807855	0.907054	0.10252	0.0495721	0.440996	0.0710447		0.361224	0.0225324	4	14	0.285714
RHOT1	224044_at							0.24216	0.155333	0.354378	0.727607	0.0396245	0.441864	0.919786	0.844972	0.338289	0.596154	0.00846451	0.0189033		0.47407	0.0478085	4	14	0.285714
F11R	224097_s_at							0.25895	0.301391	0.657935	0.42304	0.0279712	0.0388483	0.858224	0.186471	0.58204	0.0338342	0.500582	0.217549		0.0266044	0.456637	4	14	0.285714
TTTY8	224142_s_at							0.745509	0.0730968	0.000914864	0.685689	0.314031	0.16139	0.941675	0.0129966	0.439898	0.133835	0.196179	0.657839		0.038441	0.0125329	4	14	0.285714
TM2D2	224413_s_at							0.948332	0.00300891	0.0147117	0.730159	0.691301	0.0787756	0.99597	0.0193713	0.590506	0.256357	0.492074	0.493916		0.557371	0.036996	4	14	0.285714
ARHGAP9	224451_x_at							0.287288	0.221811	0.0099855	0.262429	0.295633	0.111249	0.00218677	0.974874	0.0913867	0.450703	0.318009	0.755265		0.0117166	0.0470543	4	14	0.285714
FAM220A	224452_s_at							0.379464	0.171534	0.0228793	0.877662	0.105507	0.938786	0.660586	0.200161	0.391787	0.0724793	0.00850689	0.0588345		0.0369477	0.0367344	4	14	0.285714
INF2	224469_s_at							0.103976	0.562845	0.980777	0.0196351	0.720388	0.0433252	0.481362	0.030621	0.623875	0.459691	0.358405	0.646587		0.00667422	0.0523485	4	14	0.285714
PCDHAC2	224539_s_at							0.25766	0.235963	0.607187	0.169916	0.770925	0.0463992	0.200985	0.0141685	0.989927	0.0837235	0.0487736	0.0107462		0.499917	0.119151	4	14	0.285714
AC006483.1	224594_x_at							0.0861239	0.758329	0.00050451	0.466918	0.580319	0.289093	0.361775	0.136184	0.292221	0.301074	0.0261572	0.0249151		0.0538928	0.0237279	4	14	0.285714
KLF6	224606_at							0.0261959	0.754508	0.523419	0.560388	0.143795	0.0428756	0.0017209	0.106717	0.00930785	0.191607	0.181318	0.523975		0.255541	0.267256	4	14	0.285714
MESDC2	224675_at							0.687121	0.411596	0.0281525	0.262513	0.599921	0.0411061	0.365064	0.0276906	0.396493	0.00358642	0.158601	0.0579956		0.156091	0.0731978	4	14	0.285714
TNRC6A	224705_s_at							0.285981	0.356483	0.0141918	0.388802	0.663086	0.313336	0.505173	0.758098	0.798999	0.241208	0.041306	0.0187011		0.657914	0.0475855	4	14	0.285714
EMC10	224727_at							0.588164	0.267932	0.751941	0.00180546	0.041348	0.00302804	0.29113	0.0478637	0.127257	0.729154	0.16554	0.249597		0.625386	0.874192	4	14	0.285714
ARHGAP21	224764_at							0.938666	0.450887	0.134819	0.281048	0.0395448	0.446752	0.404175	0.613517	0.884788	0.0131999	0.165996	0.152507		0.0250457	0.0028765	4	14	0.285714
NDFIP2	224802_at							0.126617	0.0390407	0.03064	0.768183	0.429773	0.384994	0.360335	0.472041	0.479644	0.0172656	0.698097	0.400361		0.0184873	0.809298	4	14	0.285714
C9orf123	224860_at							0.337157	0.274186	0.000989491	0.397546	0.83885	0.334009	0.599657	0.260115	0.575201	0.0213834	0.0553136	0.0521995		0.0294859	0.0460949	4	14	0.285714
C7orf59	224890_s_at							0.565192	0.572977	0.0909251	0.0292577	0.0020993	0.0422514	0.610632	0.0319792	0.851309	0.637501	0.637103	0.243326		0.685744	0.177336	4	14	0.285714
ATL3	224893_at							0.23085	0.219109	0.00365774	0.471132	0.424727	0.693248	0.278631	0.386891	0.159199	0.0471157	0.838237	0.0805035		0.00895855	0.000346773	4	14	0.285714
SHMT1	224954_at							0.975755	0.108323	0.104821	0.0404486	0.566285	0.146695	0.111378	0.00140292	0.00368852	0.41782	0.929448	0.96575		0.072474	0.0321595	4	14	0.285714
CAMK2D	224994_at							0.456886	0.867646	0.00503713	0.842776	0.162765	0.576404	0.578344	0.054048	0.0186378	0.681794	0.0154854	0.0596528		0.655388	0.0139689	4	14	0.285714
MPHOSPH8	225041_at							0.469316	0.0429581	0.877513	0.662586	0.755207	0.035254	0.661799	0.00428998	0.336009	0.0128022	0.295535	0.60568		0.756424	0.0650459	4	14	0.285714
AGTRAP	225059_at							0.679445	0.4992	0.000390224	0.220813	0.0462874	0.74399	0.247009	0.0463594	0.0517716	0.615864	0.986624	0.257705		0.0346039	0.732744	4	14	0.285714
NUS1	225070_at							0.132599	0.778852	0.0497809	0.369941	0.0700205	0.0187775	0.0886412	0.263121	0.851897	0.538793	0.016968	0.0205253		0.619263	0.432936	4	14	0.285714
ABI2	225098_at							0.494252	0.503134	0.0393875	0.562566	0.894926	0.223292	0.11408	0.0256972	0.0269982	0.29892	0.0230079	0.121797		0.828291	0.0602359	4	14	0.285714
AC008865.1	225176_at							0.973357	0.130117	0.0731782	0.826296	0.83933	0.0191056	0.215913	0.0320171	0.130454	0.0422396	0.0852275	0.12848		0.0803931	0.00696169	4	14	0.285714
RP11-473I1.10	225199_at							0.804595	0.721886	0.964879	0.543154	0.184169	0.805742	0.46701	0.0304506	0.164972	0.0427871	0.206585	0.312934		0.0407709	0.0192386	4	14	0.285714
H2AFJ	225245_x_at							0.174992	0.64154	0.000376252	0.917874	0.201793	9.1e-05	0.0476356	0.000961387	0.464317	0.96243	0.249861	0.0698781		0.664255	0.183613	4	14	0.285714
SPPL2B	225248_at							0.264024	0.73051	0.616157	0.869398	0.0262276	0.0280001	0.017139	0.051574	0.0213843	0.422209	0.0742834	0.223709		0.401129	0.544703	4	14	0.285714
MXD3	225251_at							0.759927	0.179876	0.0210373	0.461308	0.611938	0.0630804	0.784719	0.097	0.466708	0.0840124	0.0169602	0.0147136		0.507832	0.0088646	4	14	0.285714
FOSL2	225262_at							0.258471	0.809758	0.194423	0.026967	0.566903	0.532147	0.709572	0.409388	0.320339	0.0151342	0.619449	0.712362		0.0358615	0.0297659	4	14	0.285714
BCAT1	225285_at							0.470448	0.0287983	0.113892	0.442113	0.189267	0.444616	0.15227	0.397853	0.0809058	0.12784	0.0163686	0.516251		0.0204069	0.00018139	4	14	0.285714
HAUS1	225297_at							0.496027	0.215484	0.0309439	0.870194	0.432856	0.234227	0.0743169	0.713713	0.256673	0.00304508	0.00432906	0.00515866		0.376602	0.834744	4	14	0.285714
OIP5-AS1	225332_at							0.0250332	0.0189725	0.0406369	0.00725252	0.0688442	0.126358	0.22162	0.191754	0.38001	0.308119	0.783714	0.565106		0.456393	0.383176	4	14	0.285714
CAPRIN1	225340_s_at							0.234842	0.144261	0.00126384	0.640825	0.442169	0.369528	0.351181	0.697934	0.785257	0.00976777	0.0357237	0.0078743		0.745007	0.31514	4	14	0.285714
INO80	225357_s_at							0.923542	0.134448	0.762715	0.0120366	0.0395757	0.547985	0.00250775	0.140375	0.00285851	0.222857	0.636793	0.227818		0.235392	0.443886	4	14	0.285714
C10orf54	225373_at							0.889746	0.321281	0.00234539	0.903667	0.356642	0.0374321	0.00588077	0.11932	0.0168871	0.541904	0.284773	0.578041		0.919312	0.772401	4	14	0.285714
TSEN15	225399_at							0.0857214	0.560237	0.0429956	0.98486	0.352115	0.956311	0.202549	0.616054	0.738535	0.0427839	0.0384379	0.166967		0.11127	0.0299014	4	14	0.285714
TMEM87B	225412_at							0.904823	0.270748	0.929934	0.167179	0.536072	0.00258915	0.0516686	0.000920679	0.0722649	0.0296452	0.916828	0.973093		0.777897	0.0395291	4	14	0.285714
AGPAT3	225440_at							0.376208	0.22794	0.854665	0.198879	0.0607161	0.0395768	0.244042	0.0176789	0.113581	0.288214	0.788031	0.49964		0.0444458	0.0101604	4	14	0.285714
KIAA1468	225506_at							0.876381	0.0976982	0.0451571	0.224181	0.419656	0.000542593	0.165694	0.0453864	0.432335	0.805745	0.261645	0.454281		0.898911	0.0224545	4	14	0.285714
PNISR	225507_at							0.612569	0.0316665	0.797224	0.976958	0.78718	0.0202016	0.663435	0.0337386	0.749622	0.511094	0.531595	0.959234		0.632816	0.0175919	4	14	0.285714
AC114772.1	225522_at							0.51575	0.0648909	0.0192349	0.737504	0.729283	0.507988	0.293231	0.0367449	0.013265	0.00331583	0.6167	0.771864		0.939993	0.0905769	4	14	0.285714
RP11-392O18.1	225561_at							0.467186	0.806904	0.00398194	0.634554	0.222931	0.815342	0.272952	0.188639	0.697608	0.0141168	0.0380835	0.111615		0.557663	0.0477403	4	14	0.285714
RAP2A	225585_at							0.160162	0.5008	0.147722	0.637949	0.762152	0.705674	0.975154	0.0412873	0.00450992	0.543975	0.413057	0.217024		0.00920928	0.00578412	4	14	0.285714
EEPD1	225630_at							0.670128	0.00197498	0.331122	0.565128	0.403339	0.973951	0.196215	0.493302	0.153687	0.0308355	0.0305686	0.0499775		0.868243	0.559035	4	14	0.285714
CDC42EP3	225685_at							0.116633	0.594	0.315981	0.10716	0.507794	0.163135	0.210463	0.033346	0.0642258	0.000661665	0.0201973	0.00690192		0.0721413	0.272507	4	14	0.285714
GLCCI1	225706_at							0.129266	0.504783	0.146799	0.408735	0.282024	0.37881	0.384857	0.656545	0.643123	0.48821	0.00531785	0.00946034		0.0132377	0.00468541	4	14	0.285714
GEMIN5	225712_at							0.62025	0.226799	0.0442796	0.0602436	0.13604	0.00592526	0.0335773	0.0550425	0.0753607	0.263093	0.0993832	0.236663		0.29093	0.00463044	4	14	0.285714
ZMAT3	225725_at							0.836999	0.0748574	0.0020584	0.790947	0.157007	0.0587428	0.547387	0.0108722	0.0860904	0.0018235	0.986075	0.7316		0.0851074	0.00131305	4	14	0.285714
ANKRD50	225731_at							0.194924	0.154166	0.20064	0.833354	0.505102	0.228466	0.0813475	0.017559	0.0134508	0.0983176	0.996158	0.89967		0.0301307	0.010245	4	14	0.285714
FBXO22	225734_at							0.996198	0.0110041	0.0410463	0.572689	0.7262	0.0548935	0.0307011	0.459089	0.493407	0.00177176	0.433504	0.497492		0.560696	0.0770487	4	14	0.285714
PAPD4	225761_at							0.293293	0.244277	0.00596247	0.223526	0.632025	0.481422	0.536015	0.922988	0.838662	0.175828	0.0245069	0.0450745		0.849174	0.00235758	4	14	0.285714
JAZF1	225798_at							0.504852	0.173727	0.280625	0.398636	0.510814	0.508881	0.649432	0.0309532	0.028126	0.0109573	0.260681	0.600804		0.386494	0.0016149	4	14	0.285714
AC068491.1	225799_at							0.0111813	0.592926	0.589636	0.199364	0.306535	0.211377	0.724132	0.0348058	0.10612	0.281336	0.0684613	0.0680976		0.00161088	0.0013127	4	14	0.285714
CGNL1	225817_at							0.153229	0.569322	0.835469	0.666387	0.874643	0.0544074	0.0251225	0.0299882	0.545932	0.130527	0.457939	0.359292		0.0447434	0.0348818	4	14	0.285714
NCEH1	225847_at							0.855619	0.0879235	0.919288	0.19673	0.781204	0.953611	0.796356	0.0476337	0.0420449	0.0223852	0.277042	0.402687		0.0880429	0.00124729	4	14	0.285714
XIAP	225859_at							0.0945871	0.399524	0.308725	0.108911	0.364727	0.01207	0.0201101	0.731568	0.434675	0.0252263	0.049491	0.0537866		0.771072	0.83045	4	14	0.285714
SLC35F5	225872_at							0.545987	0.593369	0.193485	0.945403	0.428063	0.0710994	0.736204	0.998727	0.236072	0.0228679	0.00333566	0.014329		0.50111	0.0280822	4	14	0.285714
AEBP2	225889_at							0.645503	0.962396	0.00303588	0.314843	0.951767	0.549489	0.11772	0.183695	0.0178077	0.0138145	0.584667	0.642934		0.934828	0.0362127	4	14	0.285714
MARCKS	225897_at							0.996629	0.0244683	0.816119	0.909479	0.479505	0.151384	0.627134	0.142646	0.663574	0.017626	0.460945	0.985226		0.0136714	0.0066657	4	14	0.285714
NIN	225921_at							0.415864	0.241218	0.28521	0.294823	0.0726539	0.0311871	0.0199674	0.194131	0.0894551	0.00762873	0.230021	0.895648		0.420991	0.0250133	4	14	0.285714
NKIRAS1	225930_at							0.155737	0.0143634	0.187608	0.613266	0.397667	0.00535906	0.0416763	0.748893	0.826312	0.150499	0.123387	0.012401		0.11583	0.439436	4	14	0.285714
CTTNBP2NL	226000_at							0.905599	0.295517	0.0331116	0.867024	0.723639	0.951019	0.0440542	0.950893	0.0930891	0.00366849	0.325151	0.181785		0.244882	0.00140442	4	14	0.285714
TMCO3	226050_at							0.607625	0.341649	0.467279	0.739627	0.212224	0.41454	0.964189	0.00790943	0.0146175	0.293996	0.547136	0.491721		0.0203536	0.0241656	4	14	0.285714
ARRDC2	226055_at							0.508225	0.698638	0.120058	0.746113	0.940614	0.021881	0.0100934	0.210006	0.0186006	0.439552	0.634245	0.327269		0.117566	0.0193346	4	14	0.285714
SPSB1	226075_at							0.855484	0.672422	0.85148	0.14464	0.25579	0.022138	0.0103807	0.195071	0.0360847	0.0241263	0.140761	0.234252		0.799398	0.0592757	4	14	0.285714
CNOT6L	226153_s_at							0.799362	0.01181	0.0208852	0.738545	0.352609	0.478119	0.764113	0.924273	0.547368	0.0246286	0.0295123	0.200874		0.0948612	0.150156	4	14	0.285714
KIAA1432	226221_at							0.0261354	0.0348992	0.498389	0.228411	0.0294251	0.868891	0.511909	0.673853	0.886182	0.100287	0.890108	0.0656123		0.90611	0.0435419	4	14	0.285714
ZNFX1-AS1	226227_x_at							0.600276	0.394936	0.0215638	0.507255	0.778092	0.00849267	0.0414575	0.0254693	0.226771	0.0849137	0.144144	0.234879		0.509315	0.129675	4	14	0.285714
GDAP1	226271_at							0.257459	0.52619	0.51292	0.428614	0.228246	0.00530351	0.422188	0.00118889	0.298321	0.501116	0.625777	0.7636		0.0173896	0.0307235	4	14	0.285714
CAPRIN1	226285_at							0.944295	0.300394	0.241301	0.875859	0.904642	0.00181146	0.00224654	0.0202351	0.00431732	0.227006	0.689164	0.383082		0.994656	0.26244	4	14	0.285714
C11orf46	226383_at							0.0749792	0.423416	0.00137354	0.812921	0.342103	0.519336	0.503045	0.126507	0.758664	0.00323865	0.0360459	0.0420242		0.942191	0.995908	4	14	0.285714
PARP10	226401_at							0.707251	0.0285863	0.00872102	0.798877	0.20536	0.180485	0.489906	0.714653	0.618717	0.201055	0.0423961	0.00575673		0.971259	0.950908	4	14	0.285714
ERI1	226416_at							0.0166889	0.297469	0.0140508	0.0680893	0.523221	0.875566	0.7975	0.610514	0.99593	0.0283024	0.791234	0.59644		0.229942	0.00722649	4	14	0.285714
ERGIC2	226422_at							0.260876	0.490442	0.207783	0.719152	0.662273	0.00390678	0.292032	0.000635965	0.0375842	0.000109122	0.246134	0.0785889		0.859561	0.479439	4	14	0.285714
PAPLN	226435_at							0.409226	0.664065	0.046314	0.0418002	0.120926	0.106035	0.39992	0.390941	0.528843	0.0242416	0.270565	0.739724		0.102331	0.00321046	4	14	0.285714
STK17B	226525_at							0.671687	0.399568	0.345472	0.665266	0.357434	0.178086	0.0415788	0.646631	0.136596	0.000812868	0.415449	0.51919		0.006953	5.06e-05	4	14	0.285714
NEIL2	226585_at							0.437411	0.446108	0.654456	0.177559	0.247414	0.0135582	0.0976571	0.0204238	0.0683728	0.879287	0.345703	0.538926		0.0316337	0.00289839	4	14	0.285714
MARK1	226653_at							0.871173	0.144451	0.939525	0.317076	0.0889189	0.0469966	0.00541792	0.106847	0.00725493	0.384817	0.752671	0.70798		0.151101	0.000947854	4	14	0.285714
CRTAP	226656_at							0.33177	0.717457	0.551351	0.748166	0.82426	0.000237159	0.120751	0.0114915	0.331477	0.278579	0.152699	0.519633		0.0082874	0.00404285	4	14	0.285714
SNX18	226683_at							0.524218	0.0669038	0.810756	0.213468	0.84765	0.225959	0.271024	0.0318107	0.0253969	0.0119183	0.73295	0.343613		0.0957266	0.00855655	4	14	0.285714
FCHSD1	226698_at							0.619856	0.0277527	0.762868	0.546946	0.901471	0.180535	0.367429	0.00402133	0.954156	0.00757955	0.0555348	0.0297631		0.834157	0.414667	4	14	0.285714
TXNDC16	226747_at							0.426121	0.136163	0.03208	0.566721	0.40504	0.161842	0.00297033	0.508418	0.0107008	0.0665005	0.0220545	0.105304		0.70638	0.355792	4	14	0.285714
CCDC71L	226756_at							0.286444	0.432559	0.0272751	0.497253	0.881666	0.228017	0.464806	0.294587	0.522312	0.0100026	0.504906	0.797039		0.00661833	0.000788817	4	14	0.285714
MBTPS2	226760_at							0.0283231	0.0180846	0.000550971	0.825248	0.97391	0.245427	0.38846	0.799299	0.59967	0.0589776	0.116654	0.0216267		0.522476	0.558797	4	14	0.285714
LMBRD2	226779_at							0.798415	0.0492985	0.00564335	0.964745	0.436649	0.234829	0.0903001	0.305705	0.511138	0.00779697	0.243855	0.216154		0.452554	0.015079	4	14	0.285714
SLC25A30	226782_at							0.58582	0.0551901	0.0471673	0.10537	0.797562	0.736821	0.306421	0.204157	0.105762	0.0392547	0.110404	0.0269302		0.0259994	0.2466	4	14	0.285714
MOB3B	226844_at							0.935847	0.454265	0.464144	0.254579	0.473372	0.155537	0.0322215	0.30818	0.0560124	0.0182869	0.284452	0.736356		0.0458551	0.02213	4	14	0.285714
RP11-61A14.3	226855_at							0.7162	0.493604	0.072237	0.367345	0.376408	0.00872453	0.0141186	0.12375	0.227223	0.172034	0.00504033	0.00530782		0.208045	0.743098	4	14	0.285714
TMEM19	226860_at							0.574869	0.185011	0.0622327	0.563953	0.402673	0.243416	0.210562	0.770848	0.950391	0.0295003	0.0428193	0.103045		0.0376197	0.00206133	4	14	0.285714
FAM101B	226876_at							0.0439662	0.157591	0.782317	0.550971	0.945824	0.0159752	0.237792	0.0232778	0.18228	0.308299	0.915508	0.800976		0.0216299	0.110793	4	14	0.285714
ARHGAP9	226906_s_at							0.00953961	0.532596	0.00161276	0.330155	0.188223	0.376045	0.322379	0.033113	0.555519	0.503011	0.0603903	0.666655		0.0220375	0.0818285	4	14	0.285714
CPSF6	226934_at							0.723341	0.93981	0.0185305	0.0226859	0.924767	0.685004	0.880339	0.0300192	0.328817	0.441175	0.939355	0.918393		0.762448	0.0155625	4	14	0.285714
ADAMTS12	226997_at							0.446144	0.0333101	0.2181	0.784831	0.864923	0.207882	0.0274109	0.946159	0.477387	0.0705237	0.842847	0.426966		0.0413153	0.000107198	4	14	0.285714
ARHGAP27	227057_at							0.347119	0.582944	0.082081	0.836937	0.890438	0.022879	0.375867	0.00141962	0.0184604	0.335393	0.0592131	0.0407471		0.681675	0.263033	4	14	0.285714
RP4-717I23.3	227074_at							0.0190304	0.814902	0.106693	0.984269	0.343088	0.152658	0.207166	0.0157193	0.0358128	0.537794	0.632372	0.00471508		0.319429	0.64801	4	14	0.285714
DHTKD1	227094_at							0.454337	0.0159109	0.368096	0.60851	0.224965	0.00464198	0.00554044	0.460842	0.443407	0.922648	0.0353981	0.10363		0.0750253	0.919598	4	14	0.285714
TMCC1	227112_at							0.800412	0.0437257	0.712971	0.11963	0.67756	0.819067	0.024881	0.201456	0.656074	0.218781	0.223987	0.149786		0.0254783	0.000709531	4	14	0.285714
C14orf126	227158_at							0.421487	0.276176	0.0196595	0.0227834	0.516334	0.0637636	0.4	0.629132	0.905259	0.00963269	0.666398	0.451623		0.0821936	0.0413752	4	14	0.285714
ZMAT3	227221_at							0.271403	0.0381009	0.0720281	0.868023	0.35329	0.675504	0.709923	0.0800709	0.0693836	0.0148047	0.827546	0.549808		0.000504007	0.0473971	4	14	0.285714
RP11-588K22.2	227235_at							0.985115	0.858787	0.162837	0.981586	0.761874	0.792796	0.0165668	0.411492	0.00587789	0.0154752	0.140483	0.047918		0.181025	0.497571	4	14	0.285714
KLF12	227261_at							0.391578	0.334654	0.0283068	0.200817	0.36542	0.000577589	0.0038522	0.366843	0.844993	0.198267	0.115351	0.0870236		0.2297	0.011783	4	14	0.285714
TMC8	227353_at							0.564968	0.426167	0.847799	0.675165	0.0336372	0.00748823	0.000977224	0.657854	0.0375017	0.527098	0.467718	0.551779		0.733051	0.303046	4	14	0.285714
TBCEL	227395_at							0.838714	0.259939	0.0112691	0.785738	0.379718	0.678053	0.118491	0.499534	0.290961	0.0411164	0.00939731	0.0272294		0.218083	0.129852	4	14	0.285714
YBEY	227421_at							0.170562	0.996483	0.0248981	0.216708	0.77031	0.0119379	0.24851	0.0071856	0.0967511	0.182346	0.314179	0.621769		0.203941	0.0110507	4	14	0.285714
TAOK1	227454_at							0.87959	0.021246	0.0495619	0.617689	0.594074	0.345278	0.967261	0.058018	0.212394	0.012388	0.629372	0.613442		0.748059	0.00484114	4	14	0.285714
AAED1	227534_at							0.161761	0.383192	0.877533	0.309443	0.368477	0.142048	0.472244	0.0746502	0.157099	0.0142369	0.903204	0.0325314		0.0260535	0.0160523	4	14	0.285714
ITPRIPL2	227792_at							0.833398	0.14284	0.508093	0.661668	0.82723	0.045218	0.843188	0.016568	0.474909	0.0499232	0.744891	0.516475		0.041447	0.0712942	4	14	0.285714
GABRB3	227830_at							0.151997	0.687468	0.556479	0.735119	0.696969	0.0318417	0.0386393	0.146236	0.202286	0.696995	0.0138677	0.282707		0.0181583	0.132015	4	14	0.285714
UTP23	227836_at							0.0892756	0.292004	0.00380459	0.0250271	0.871416	0.182731	0.537249	0.256141	0.379139	0.075492	0.0326466	0.0285929		0.472124	0.363426	4	14	0.285714
INO80D	227931_at							0.716478	0.0491342	0.000946281	0.389035	0.937391	0.0855895	0.374425	0.0421135	0.322363	0.0366664	0.330868	0.620221		0.804456	0.553023	4	14	0.285714
METAP2	227993_at							0.473535	0.182232	0.0489091	0.573419	0.0349646	0.288051	0.343095	0.885193	0.937874	0.00440617	0.401302	0.13914		0.794965	0.00518458	4	14	0.285714
PTCD3	228020_at							0.172184	0.139846	0.00722121	0.715243	0.32074	0.000308181	0.0214692	0.0291316	0.574234	0.475267	0.197447	0.272858		0.476379	0.296785	4	14	0.285714
ZNF827	228046_at							0.384935	0.394047	0.00916894	0.940705	0.638003	0.393995	0.379462	0.228982	0.0387414	0.758929	0.0112794	0.0573958		0.476195	0.0441227	4	14	0.285714
CP	228143_at							0.0293358	0.700651	0.730915	0.604207	0.0824982	0.321947	0.249407	0.0128224	0.0370673	0.231898	0.440774	0.759002		0.0352453	0.732709	4	14	0.285714
RNF144B	228153_at							0.853244	0.392383	0.0229359	0.148113	0.851961	0.0495935	0.536082	0.0263034	0.323552	0.0109128	0.493134	0.573402		0.0537374	0.0846138	4	14	0.285714
PAPPA2	228237_at							0.950887	0.421661	0.0612086	0.795016	0.841902	0.0217837	0.708445	0.0273578	0.41677	0.010194	0.00296624	0.343874		0.162518	0.0721496	4	14	0.285714
EPB41L4A	228256_s_at							0.215056	0.22901	0.141243	0.293638	0.834352	0.0901548	0.0155562	0.21071	0.0444032	0.0179746	0.116014	0.0371135		0.097907	0.901727	4	14	0.285714
NFIX	228278_at							0.351212	0.0103541	0.0419992	0.251523	0.76732	0.00269537	0.0801821	0.00696868	0.171568	0.166935	0.773804	0.780632		0.822419	0.296799	4	14	0.285714
TDRD9	228285_at							0.406104	0.0273872	0.67786	0.628857	0.986096	0.00916283	0.0634539	0.096275	0.0739352	0.377748	0.0475283	0.245639		0.0896859	0.00454982	4	14	0.285714
WDR27	228326_at							0.473277	0.190363	0.292252	0.339142	0.374294	0.00299692	0.414941	0.046434	0.291209	0.228233	0.0440425	0.016347		0.76663	0.363816	4	14	0.285714
SHROOM3	228400_at							0.0418933	0.524028	0.967714	0.235826	0.133774	0.0158611	0.616967	0.00617803	0.236188	0.0412522	0.458324	0.506655		0.155646	0.546821	4	14	0.285714
MAP9	228423_at							0.358285	0.474731	0.0168051	0.509413	0.55379	0.533157	0.875873	0.0163626	0.616092	0.00375972	0.937105	0.740008		0.297827	0.0175975	4	14	0.285714
DENND5B	228551_at							0.571708	0.0417035	0.13363	0.292351	0.699795	0.0197641	0.416989	0.218941	0.343697	0.0342765	0.00280551	0.073938		0.557635	0.108514	4	14	0.285714
FAM76A	228604_at							0.511424	0.305482	0.0439236	0.00883627	0.729768	0.0613703	0.573257	0.13778	0.969656	0.452468	0.0312908	0.10315		0.401718	0.0348701	4	14	0.285714
CD36	228766_at							0.501016	0.312001	0.0457297	0.827278	0.427315	0.804158	0.762842	0.0123804	0.0206871	0.0163995	0.319213	0.101732		0.787776	0.197665	4	14	0.285714
GJC1	228776_at							0.829537	0.586499	0.386801	0.325209	0.370591	0.0198985	0.477894	0.793595	0.0662042	0.490454	0.000215815	8.47e-05		0.0161972	0.98396	4	14	0.285714
KBTBD3	228777_at							0.726236	0.130279	0.0433681	0.92841	0.620884	0.030164	0.644707	0.359355	0.596509	0.198606	0.0291174	0.0269086		0.757057	0.325654	4	14	0.285714
EXOC3	228847_at							0.980422	0.0663107	0.87313	0.0302156	0.0362664	0.710435	0.984122	0.941299	0.256218	0.44349	0.567252	0.84851		0.0358485	0.0175333	4	14	0.285714
ADAM1	228925_at							0.298636	0.363223	0.00648309	0.490774	0.601039	0.565175	0.701121	0.649126	0.816971	0.616595	0.0152702	0.00270998		0.193103	0.0446282	4	14	0.285714
RP11-752G15.6	228930_at							0.159907	0.438977	0.00311225	0.196094	0.519697	0.00237271	0.0429941	0.0181508	0.36499	0.30857	0.469728	0.957502		0.541562	0.298186	4	14	0.285714
GS1-358P8.4	228959_at							0.891984	0.580767	0.725314	0.113238	0.213284	0.0469121	0.561814	0.00091049	0.0288712	0.128933	0.809453	0.544557		0.0726918	0.0399608	4	14	0.285714
GAB1	229114_at							0.21808	0.588152	0.26868	0.399844	0.531142	0.228583	0.0776623	0.154821	0.0737693	0.0201932	0.0130869	0.0123586		0.0197644	0.248511	4	14	0.285714
CMKLR1	229121_at							0.546124	0.180956	0.795044	0.116675	0.447337	0.0339048	0.0990994	0.0668479	0.614142	0.106032	0.0203153	0.292514		0.0203102	0.0220396	4	14	0.285714
TMEM19	229126_at							0.499132	0.0681471	0.000649872	0.0314944	0.766325	0.351178	0.838794	0.31433	0.778177	0.004631	0.268917	0.667271		0.211687	0.0235395	4	14	0.285714
RASSF6	229147_at							0.191845	0.270391	0.00425291	0.793741	0.938633	0.0745482	0.0125303	0.0220284	0.0232087	0.153846	0.081522	0.486668		0.497609	0.0652067	4	14	0.285714
SLC14A1	229151_at							0.327603	0.613576	0.0497174	0.487757	0.689162	0.00605268	0.446145	0.00927628	0.688895	0.0178855	0.592983	0.337512		0.77923	0.21351	4	14	0.285714
IL17RA	229295_at							0.461818	0.319993	0.21378	0.262265	0.0195248	0.0129717	0.00128194	0.082304	0.00756473	0.0756785	0.429082	0.627138		0.0619617	0.834285	4	14	0.285714
NADKD1	229299_at							0.422205	0.121805	0.399976	0.347212	0.370399	0.000346763	0.17252	0.177161	0.434565	0.0538351	0.0350256	0.0282206		0.518058	0.0124805	4	14	0.285714
PDIA3	229453_at							0.897473	0.1755	0.0166124	0.89757	0.53453	0.170154	0.121633	0.40659	0.127813	0.0188971	0.260371	0.918055		0.0103788	0.0423203	4	14	0.285714
MYEF2	229464_at							0.477426	0.498301	0.0558423	0.0995446	0.514307	0.0354154	0.132179	0.000180406	0.00201353	0.989345	0.300936	0.410368		0.0975658	0.0234439	4	14	0.285714
MAMDC4	229473_at							0.366525	0.668269	0.704678	0.0456766	0.144046	0.689284	0.633941	0.2775	0.0083775	0.75526	0.109264	0.0400393		0.145645	0.000861562	4	14	0.285714
MBNL3	229498_at							0.798148	0.00946643	0.00501157	0.883993	0.0851688	0.637343	0.0998941	0.865022	0.20157	0.11383	0.686668	0.272931		0.0232572	0.00791969	4	14	0.285714
SMARCE1	229511_at							0.472488	0.588061	0.00557065	0.0843938	0.029218	0.858091	0.920195	0.305576	0.1685	0.180912	0.603415	0.416743		0.0417159	0.04801	4	14	0.285714
PGM2L1	229553_at							0.382363	0.035096	0.019976	0.583189	0.997333	0.224098	0.499984	0.190239	0.54193	0.0317753	0.939738	0.621042		0.158527	0.0495746	4	14	0.285714
AMDHD1	229596_at							0.211075	0.0227435	0.212399	0.863158	0.115463	0.000345952	0.0341445	0.613677	0.582555	0.478875	0.29826	0.168991		0.532614	0.0206083	4	14	0.285714
CD109	229900_at							0.122825	0.313796	0.714698	0.153821	0.465472	0.000788318	0.00277779	0.0153971	0.0751352	0.8456	0.259404	0.610784		0.0817063	0.00495145	4	14	0.285714
KHDC1	230055_at							0.703618	0.43791	0.0416731	0.00957983	0.121862	0.316325	0.544484	0.0483839	0.162325	0.088367	0.051266	0.371448		0.0567391	0.0153077	4	14	0.285714
GDNF	230090_at							0.979174	0.0672749	0.983534	0.810556	0.48178	0.0208488	0.079335	0.209131	0.650964	0.997898	0.00332145	0.0252614		0.854439	0.0139519	4	14	0.285714
DOCK5	230263_s_at							0.251262	0.899112	0.00818182	0.774541	0.0435596	0.0905279	0.69478	0.432393	0.0259494	0.45438	0.0127162	0.696914		0.0830526	0.982049	4	14	0.285714
DUSP15	230402_at							0.239292	0.259517	0.480387	0.0477957	0.329907	0.247868	0.0349336	0.414341	0.0185629	0.472572	0.580269	0.685805		0.888474	0.049539	4	14	0.285714
RFX3	230403_at							0.165682	0.14574	0.041513	0.758642	0.472575	0.125853	0.147006	0.254607	0.128662	0.995123	0.0488637	0.0202101		0.469838	0.00945352	4	14	0.285714
EIF3F	230479_at							0.73295	0.519736	0.0336885	0.0459375	0.335031	0.0223309	0.2996	0.335402	0.663228	0.00233527	0.60196	0.646287		0.785609	0.70387	4	14	0.285714
GTPBP10	230684_at							0.406794	0.277809	0.027107	0.0276149	0.228407	0.232289	0.864255	0.898294	0.541002	0.818497	0.0146254	0.000150407		0.707128	0.542443	4	14	0.285714
AC016722.2	230799_at							0.986141	0.795268	0.352213	0.830074	0.421543	0.0351689	0.0162433	0.0208109	0.0643632	0.0323404	0.349979	0.41689		0.0799137	0.153072	4	14	0.285714
GS1-465N13.1	230968_at							0.503808	0.120457	0.974131	0.378574	0.563908	0.0228839	0.0458834	0.0760052	0.026328	0.587458	0.420994	0.743732		0.0264402	0.329975	4	14	0.285714
SLC13A3	231217_at							0.110953	0.672741	0.987643	0.711435	0.750814	0.00079417	0.0417873	0.0292066	0.680814	0.776042	0.0603473	0.0114594		0.242792	0.21663	4	14	0.285714
CCNB3	231481_at							0.0247191	0.942223	0.234616	0.16319	0.0351282	0.768983	0.807116	0.00434068	0.0569527	0.0417091	0.375832	0.201417		0.486865	0.891227	4	14	0.285714
WDPCP	231770_x_at							0.23167	0.0529413	0.781165	0.747175	0.534454	0.0805166	0.253836	0.0272133	0.134037	0.411842	0.0232745	0.0264837		0.351493	0.0119047	4	14	0.285714
KIAA1217	231807_at							0.171141	0.0297817	0.727376	0.202144	0.535525	0.790359	0.049311	0.404241	0.773535	0.0415429	0.41781	0.387714		0.0409278	0.891819	4	14	0.285714
COL12A1	231879_at							0.639515	0.422506	0.461867	0.297256	0.630256	0.0188679	0.865038	0.0272952	0.946467	0.0598505	0.156671	0.912563		0.0368776	0.000654338	4	14	0.285714
RBPMS	231961_at							0.0261577	0.413537	0.392979	0.62136	0.355562	0.0226118	0.0231109	0.0934006	0.0293002	0.696412	0.69901	0.838645		0.439723	0.789543	4	14	0.285714
BICD1	231964_at							0.911819	0.354703	0.0358682	0.6505	0.144988	0.545373	0.573443	0.116797	0.932695	0.864536	0.0402737	0.102945		0.0457424	0.00521567	4	14	0.285714
AC090186.1	232382_s_at							0.749654	0.489375	0.640803	0.025651	0.341528	0.00329237	0.0897711	0.0303211	0.470539	0.309529	0.892303	0.389648		0.80123	0.0379387	4	14	0.285714
SHROOM4	232404_at							0.42779	0.988673	0.0272817	0.508109	0.36478	0.955722	0.757129	0.881855	0.580023	0.364803	0.046849	0.038864		0.0329147	0.0542989	4	14	0.285714
ARHGAP9	232543_x_at							0.301733	0.347932	0.00637341	0.0919339	0.458186	0.810424	0.00319773	0.747584	0.040427	0.950614	0.530821	0.470278		0.00864385	0.995421	4	14	0.285714
RP4-659J6.2	232579_at							0.0199188	0.117463	0.196796	0.429433	0.650853	0.186627	0.0489654	0.129182	0.0653061	0.402414	0.0401422	0.0507512		0.1926	0.0190895	4	14	0.285714
CTSS	232617_at							0.414162	0.410014	0.499045	0.128074	0.0174219	0.875974	0.240149	0.908194	0.35259	0.0246948	0.139341	0.301482		0.00693384	0.00178969	4	14	0.285714
GPRIN3	232687_at							0.753631	0.128938	0.00272169	0.977431	0.252475	0.0289982	0.0444536	0.986782	0.0001094	0.0806037	0.0712112	0.383757		0.179955	0.189642	4	14	0.285714
COX4I2	232761_at							0.468183	0.408902	0.0339189	0.914257	0.259539	0.0142933	0.442889	0.0473097	0.468341	0.280008	0.268958	0.667867		0.409519	0.00926399	4	14	0.285714
Y_RNA	232784_at							0.0233607	0.146134	0.668087	0.447264	0.937367	0.00543831	0.0392178	0.038973	0.274377	0.404188	0.474146	0.321492		0.885823	0.96953	4	14	0.285714
SLC4A9	233183_at							0.0673206	0.787792	0.0102349	0.735836	0.33148	0.00450147	0.394561	0.00520984	0.0868731	0.614287	0.192092	0.11533		0.840396	0.0217995	4	14	0.285714
CYP26B1	234721_s_at							0.369638	0.757507	0.482642	0.495255	0.503216	0.573518	0.0710683	0.598669	0.0866745	0.26681	0.00521861	0.0150438		0.0499838	0.00864276	4	14	0.285714
ZNF416	234902_s_at							0.629782	0.840538	0.0178279	0.770749	0.497909	0.0462015	0.0244805	0.0829015	0.0183724	0.138281	0.964134	0.785533		0.509335	0.936617	4	14	0.285714
UBR3	234982_at							0.235744	0.656083	0.00652076	0.605192	0.159987	0.386136	0.918827	0.627284	0.351936	0.00876554	0.0780201	0.0350782		0.655826	0.0219242	4	14	0.285714
GCLM	234986_at							0.208057	0.144272	0.646238	0.26372	0.951243	0.0338193	0.0716398	0.360723	0.530409	0.142661	0.00244459	0.0109973		0.000834441	0.0930139	4	14	0.285714
CSRNP3	235018_at							0.47064	0.492319	0.105879	0.181236	0.0484967	0.988436	0.00584892	0.0347116	0.131319	0.756571	0.784523	0.382057		0.0156064	0.907588	4	14	0.285714
RBM7	235045_at							0.43342	0.923499	0.206519	0.0665559	0.184203	0.0302299	0.647709	0.373881	0.712752	0.0293477	0.040881	0.0320177		0.587644	0.75153	4	14	0.285714
CCDC50	235051_at							0.540003	0.231088	0.0179873	0.624842	0.597142	0.9589	0.263101	0.0362489	0.187838	0.22736	0.00214426	0.00789677		0.0607011	0.710978	4	14	0.285714
FAM73A	235125_x_at							0.161556	0.250981	0.12279	0.61873	0.815286	0.0164603	0.0350911	0.276574	0.271457	0.0869332	0.0133387	0.0437589		0.635013	0.0821114	4	14	0.285714
PPP1R1A	235129_at							0.509135	0.547402	0.00522256	0.0312821	0.157804	0.00680928	0.577421	0.00401115	0.455379	0.49732	0.685587	0.311636		0.956222	0.228051	4	14	0.285714
ZNF25	235164_at							0.580148	0.782544	0.00919252	0.32947	0.325161	0.0348951	0.14595	0.391164	0.491193	0.663908	0.0592777	0.0484452		0.176809	0.0218284	4	14	0.285714
ZNF92	235170_at							0.672096	0.192681	0.017982	0.313149	0.793267	0.0107827	0.220278	0.27251	0.828353	0.0214534	0.020491	0.0678052		0.494569	0.163241	4	14	0.285714
FOXP2	235201_at							0.228228	0.23024	0.461918	0.0476142	0.0399538	0.231329	0.00488168	0.851436	0.0321641	0.861714	0.330831	0.501285		0.0824243	0.166451	4	14	0.285714
SPG7	235325_at							0.390023	0.321647	0.919186	0.00730236	0.0168007	0.0430703	0.264905	0.122903	0.122518	0.590837	0.0311949	0.247226		0.780161	0.659091	4	14	0.285714
FUNDC1	235346_at							0.441709	0.126803	0.064339	0.493981	0.871736	0.656402	0.827472	0.566634	0.855846	0.0157357	0.00326894	0.0353616		0.0588781	0.0355039	4	14	0.285714
PLAA	235394_at							0.749797	0.215815	0.0140872	0.136914	0.988051	0.0921817	0.016226	0.894052	0.642889	0.39879	0.00273198	0.0314807		0.918606	0.361319	4	14	0.285714
MAML2	235457_at							0.267811	0.893673	0.128568	0.920731	0.804037	0.0838558	0.0163682	0.373385	0.0621909	0.0419014	0.930324	0.829668		0.0216768	0.0387392	4	14	0.285714
SAMHD1	235529_x_at							0.976506	0.31088	0.921322	0.88362	0.874968	0.0213681	0.156964	0.0204037	0.19612	0.208991	0.858809	0.406613		0.0319857	0.0113899	4	14	0.285714
PGGT1B	235615_at							0.798393	0.417185	0.0264416	0.570411	0.489965	0.0328711	0.277475	0.047269	0.374635	0.00588025	0.360445	0.217927		0.321493	0.313109	4	14	0.285714
ALKBH8	235713_at							0.98242	0.130843	0.0322068	0.0276847	0.381653	0.0334546	0.68042	0.0981283	0.969621	0.541169	0.360234	0.985259		0.664116	0.0492144	4	14	0.285714
TBL1XR1	235890_at							0.681554	0.129081	0.0333204	0.709723	0.757875	0.260058	0.323994	0.75362	0.800415	0.0302629	0.771319	0.866471		0.0335066	0.00247933	4	14	0.285714
SMARCE1	236016_at							0.788141	0.942567	0.374625	0.356815	0.23933	0.160159	0.921994	0.397709	0.595768	0.660256	0.043583	0.0169298		0.0161749	0.00263517	4	14	0.285714
PRDM15	236061_at							0.943329	0.373066	0.0415111	0.47168	0.543683	0.00763	0.0363145	0.0443412	0.240806	0.689915	0.515075	0.517435		0.536305	0.194372	4	14	0.285714
TRIP11	236160_at							0.137877	0.588481	0.0310648	0.726564	0.513128	0.539073	0.878575	0.219896	0.29818	0.0467185	0.0176745	0.0465258		0.682248	0.756176	4	14	0.285714
BTLA	236226_at							0.0100932	0.343765	0.0290923	0.866409	0.70129	0.139689	0.157168	0.936171	0.243343	0.285484	0.00915432	0.02321		0.0972397	0.389212	4	14	0.285714
C20orf151	236258_at							0.166241	0.433379	0.187838	0.0232748	0.500031	0.0407067	0.493522	0.0168316	0.425526	0.129262	0.933778	0.703151		0.958673	0.0317623	4	14	0.285714
SP4	236265_at							0.788463	0.877817	0.0106313	0.738672	0.373717	0.0173777	0.0122067	0.327393	0.0723356	0.0453989	0.362499	0.633567		0.0906002	0.533028	4	14	0.285714
CDKN2B	236313_at							0.348538	0.0733523	0.468948	0.905159	0.532036	0.0179888	0.0345125	0.907578	0.887463	0.147219	0.289362	0.508013		0.0126609	0.00946231	4	14	0.285714
AC016725.4	236387_at							0.679316	0.0141308	0.808081	0.789783	0.324485	0.0309292	0.417363	0.0465818	0.522201	0.822509	0.41658	0.375429		0.733962	0.00853344	4	14	0.285714
RP5-1121A15.1	236967_at							0.330043	0.368247	0.0108573	0.186484	0.423911	0.0479038	0.920649	0.0533113	0.989358	0.470378	0.226065	0.166086		0.0258359	0.000656535	4	14	0.285714
ITGB2	236988_x_at							0.911669	0.237336	0.879192	0.00719146	0.530245	0.9692	0.355903	0.156568	0.0302982	0.882387	0.00319582	0.0161182		0.98615	0.768087	4	14	0.285714
USP43	237439_at							0.549906	0.83987	0.0193323	0.632634	0.557946	0.0525484	0.0494163	0.0189764	0.00679907	0.196632	0.369287	0.99441		0.428581	0.437279	4	14	0.285714
RP4-594L9.2	237574_at							0.416985	0.966095	0.00179257	0.634438	0.971632	0.776862	0.588638	0.905309	0.677047	0.434047	0.00775393	0.00744563		0.26279	0.0421623	4	14	0.285714
RP11-742B18.1	237682_at							0.153186	0.972865	0.00191347	0.256182	0.65608	0.0384396	0.790378	0.00304855	0.337438	0.379456	0.220965	0.0148949		0.0557471	0.692227	4	14	0.285714
RP11-557H15.2	237731_at							0.110343	0.315677	0.25665	0.184862	0.017077	0.383468	0.568689	0.0241801	0.141851	0.290803	0.173469	0.139796		0.0184912	0.0426937	4	14	0.285714
ZNF268	238030_at							0.262928	0.326329	0.0252055	0.268201	0.00975877	0.00296659	0.00494057	0.120857	0.0919807	0.230951	0.300799	0.219927		0.50043	0.567734	4	14	0.285714
CANX	238034_at							0.204268	0.519674	0.000305369	0.870214	0.971712	0.0763336	0.439577	0.0182538	0.128041	0.0272175	0.748835	0.436266		0.145	0.018046	4	14	0.285714
WDFY3-AS2	238081_at							0.636259	0.661781	0.49949	0.455097	0.372103	0.0408959	0.637041	0.51139	0.498403	0.989509	0.00335849	0.0412547		0.359313	0.0104843	4	14	0.285714
RTCA	238087_at							0.780648	0.00249876	0.55329	0.0253343	0.791246	0.661891	0.691873	0.122581	0.741948	0.266351	0.0306556	0.0139943		0.410869	0.812808	4	14	0.285714
ZNF506	238493_at							0.825871	0.413738	0.00621838	0.0788464	0.216601	0.00257239	0.373667	0.511154	0.205564	0.992499	0.039843	0.0235153		0.623614	0.31935	4	14	0.285714
PRRG4	238513_at							0.257641	0.943951	0.190331	0.5966	0.935788	0.8076	0.437461	0.562579	0.0363862	0.0233204	0.222229	0.427219		0.0357697	0.0197688	4	14	0.285714
TRERF1	238520_at							0.435004	0.252335	0.0133856	0.638776	0.0434282	0.412968	0.457889	0.474054	0.279196	0.0314495	0.650052	0.530667		0.0111214	0.0639475	4	14	0.285714
C11orf52	238805_at							0.427977	0.766274	0.494608	0.0281793	0.0416082	0.28819	0.768383	0.80031	0.852925	0.888123	0.560985	0.841595		0.0226677	0.0483663	4	14	0.285714
FIGN	238964_at							0.189064	0.0285865	0.122483	0.338743	0.47813	0.0351757	0.682905	0.0451887	0.843111	0.942871	0.195641	0.55566		0.508481	0.0134827	4	14	0.285714
FUBP3	239193_at							0.0263277	0.0304395	0.171931	0.31869	0.0447143	0.0189579	0.788007	0.270316	0.682446	0.603459	0.240731	0.241141		0.234189	0.463899	4	14	0.285714
SLC35G1	239265_at							0.212674	0.97895	0.840886	0.238009	0.759063	0.113545	0.484701	0.0280452	0.135553	0.0460099	0.593524	0.285801		0.0171566	0.0243614	4	14	0.285714
ATP6V0D1	239633_at							0.435738	0.342634	0.00459784	0.652134	0.508342	0.168139	0.164598	0.667548	0.127371	0.0335614	0.0290388	0.0192148		0.990906	0.241604	4	14	0.285714
LYPD1	239650_at							0.262401	0.156914	0.0790339	0.00588036	0.0251107	0.698607	0.748012	0.457028	0.283577	0.0937041	0.0296305	0.552997		0.428715	0.0484554	4	14	0.285714
C17orf56	239681_at							0.31795	0.0398704	0.996187	0.352903	0.422302	0.0353733	0.460898	0.0550225	0.432468	0.5917	0.0334136	0.313853		0.016613	0.192986	4	14	0.285714
OSBP2	239872_at							0.326929	0.0632726	0.160153	0.173539	0.595541	0.0222434	0.117463	0.0356673	0.0495193	0.940189	0.44796	0.230215		0.104773	0.0498025	4	14	0.285714
HBM	240336_at							0.0390623	0.337204	0.010219	0.433804	0.232835	0.439324	0.0336447	0.389329	0.0391486	0.217573	0.115508	0.0805184		0.311307	0.162546	4	14	0.285714
PYHIN1	240413_at							0.27947	0.643115	0.227269	0.957422	0.0414838	0.217918	0.792942	0.0417242	0.37992	0.00587783	0.283457	0.780123		0.400775	0.0106296	4	14	0.285714
RP1-170O19.17	240624_x_at							0.878152	0.0918941	0.875556	0.0538216	0.0416371	0.165519	0.938099	0.00585018	0.174407	0.907909	0.0429728	0.398862		0.0216701	0.730541	4	14	0.285714
LRMP	240718_at							0.0437496	0.415158	0.961709	0.0296005	0.198164	0.0349114	0.314956	0.638169	0.2417	0.0368346	0.0592505	0.436427		0.302349	0.630364	4	14	0.285714
CTD-2194D22.2	240817_at							0.0454689	0.710628	0.158334	0.587116	0.989737	0.504631	0.778405	0.0389897	0.369355	0.0197901	0.179019	0.0110836		0.465983	0.884243	4	14	0.285714
EIF2AK3	241463_at							0.336059	0.938679	0.462249	0.497252	0.956415	0.10736	0.124938	0.0186651	0.157647	0.0261755	0.0442857	0.00315938		0.621247	0.15164	4	14	0.285714
SRFBP1	241734_at							0.805997	0.472236	0.0104055	0.0808088	0.761705	0.139126	0.0385046	0.960191	0.416425	0.0553047	0.00183701	0.0104277		0.0602348	0.731123	4	14	0.285714
HNRNPH3	241996_at							0.108779	0.692042	0.01126	0.00309011	0.888656	0.00353446	0.104509	0.0537029	0.0940491	0.112353	0.966044	0.273053		0.230144	0.0351447	4	14	0.285714
CTD-2192J16.17	242028_at							0.331613	0.695697	0.00306553	0.033341	0.493268	0.00564531	0.337523	0.099642	0.560498	0.0281039	0.814774	0.182065		0.938755	0.0819703	4	14	0.285714
ASPH	242037_at							0.221229	0.120032	0.514485	0.747701	0.694556	0.299647	0.673041	0.040833	0.689874	0.603963	0.0876796	0.02616		0.000352697	0.00869335	4	14	0.285714
GS1-279B7.1	242226_at							0.165417	0.800776	0.0275603	0.208791	0.0277775	0.550451	0.876137	0.576023	0.82357	0.44008	0.0404943	0.0262946		0.474048	0.666178	4	14	0.285714
SLC25A42	242274_x_at							0.750606	0.946897	0.0396687	0.48209	0.346623	0.136154	0.282097	0.291844	0.0251887	0.379175	0.0271768	0.0107644		0.41983	0.37002	4	14	0.285714
YBEY	242565_x_at							0.362941	0.891645	0.329815	0.055901	0.21692	0.339005	0.967021	0.00236574	0.0203814	0.0275828	0.602612	0.743922		0.0329298	0.499418	4	14	0.285714
CTC-281B15.1	242585_at							0.0386965	0.0370356	0.0079804	0.85339	0.361343	0.460149	0.129916	0.74182	0.215403	0.0657455	0.0897601	0.0317503		0.559717	0.922637	4	14	0.285714
PRCP	242636_at							0.0183334	0.812612	0.834181	0.255693	0.0310112	0.601121	0.669988	0.976293	0.887368	0.000504794	0.291147	0.763044		0.352129	0.0262816	4	14	0.285714
ZNF253	242919_at							0.211932	0.399621	0.093102	0.200512	0.124509	0.00149873	0.70916	0.0204376	0.765733	0.218575	0.0431687	0.0191918		0.130658	0.593453	4	14	0.285714
STRN	242989_at							0.228851	0.410088	0.0074665	0.393588	0.681137	0.192868	0.160482	0.0169907	0.0998847	0.94012	0.0280636	0.0449307		0.734125	0.125489	4	14	0.285714
ZDHHC20	243786_at							0.836579	0.641651	0.357507	0.00808197	0.165128	0.0215691	0.466999	0.0199034	0.709364	0.631944	0.0856994	0.0491323		0.337803	0.508248	4	14	0.285714
ZNF585A	243790_at							0.16213	0.653278	0.0354045	0.70358	0.771184	0.0635119	0.0154963	0.898675	0.687354	0.37424	0.026221	0.0134532		0.419323	0.386948	4	14	0.285714
CCDC80	243864_at							0.954676	0.759493	0.520944	0.729896	0.406628	0.330267	0.55259	0.0822735	0.970502	0.0763764	0.0119413	0.0133807		0.00830623	0.000123911	4	14	0.285714
RP11-171N4.2	243892_at							0.388082	0.972881	0.0736929	0.728907	0.614749	0.253882	0.631034	0.0924826	0.234164	0.0113989	0.0116209	0.00254081		0.025432	0.0661358	4	14	0.285714
TSHZ2	243940_at							0.102162	0.438187	0.151205	0.0302371	0.311875	0.923498	0.911193	0.550539	0.897934	0.995615	0.0409023	0.282985		0.0111089	0.0272775	4	14	0.285714
TRAM1L1	244334_at							0.631767	0.150169	0.55544	0.374659	0.75767	0.0338387	0.221466	0.0387543	0.361576	0.657425	0.569203	0.671265		0.0498523	0.0494811	4	14	0.285714
CTC-359D24.3	244406_at							0.688769	0.0263665	0.0753082	0.594516	0.00822194	0.023071	0.515216	0.248251	0.397766	0.0133177	0.655194	0.4328		0.386667	0.300317	4	14	0.285714
DNMT3A	244428_at							0.995633	0.292769	0.82701	0.364392	0.549848	0.00637206	0.0117752	0.0243437	0.0099126	0.125398	0.749396	0.977071		0.216611	0.860617	4	14	0.285714
CHD2	244443_at							0.728001	0.0538064	0.249273	0.332464	0.54333	0.0175823	0.148583	0.0235536	0.248431	0.703264	0.0467789	0.169772		0.213523	0.0228811	4	14	0.285714
AC064852.4	244582_at							0.874858	0.974527	0.0604715	0.716658	0.745406	0.578924	0.219802	0.0414568	0.0229458	0.715741	0.207929	0.0492712		0.254702	0.0282135	4	14	0.285714
DBT	244687_at							0.0181641	0.795567	0.146362	0.631133	0.216518	0.129653	0.00892273	0.922634	0.405461	0.926826	0.00801582	0.141404		0.309574	0.0198214	4	14	0.285714
RECQL5	34063_at	0.497401	0.012141	3.89e-05	0.835449	0.808849	0.316053	0.947326	0.129459	0.00568712	0.166032	0.850244	0.239358	0.1955	0.0446952	0.0797061	0.711472	0.0848135	0.00683805	0.0154544	0.592806	0.442077	6	21	0.285714
MIPEP	36830_at	0.576921	0.450317	0.0255408	0.0579144	0.542666	0.40447	0.122748	0.141703	0.288151	0.725049	0.933604	0.00559347	0.285814	0.356494	0.690427	0.243322	0.0126487	0.0398371	0.0430251	0.124026	0.0267874	6	21	0.285714
STAB1	38487_at	0.980498	0.415567	0.398844	0.425623	0.0397973	0.603223	0.874695	0.444415	0.00126664	0.0317146	0.116944	0.0981155	0.066152	0.0501096	0.0856412	0.103996	0.0330859	0.0738538	0.239232	0.0108429	0.0394309	6	21	0.285714
AQP3	39248_at	0.730064	0.90895	0.00354063	0.0502274	0.945859	0.0827999	0.697563	0.945651	0.0701878	0.0417296	0.726628	0.016867	0.0387898	0.013841	0.0415172	0.956922	0.420538	0.28138	0.411435	0.632106	0.061307	6	21	0.285714
ZNF710	39891_at	0.34482	0.551661	0.000724761	0.362523	0.245538	0.737977	0.373542	0.784595	0.0295518	0.191447	0.312418	0.81128	0.117153	0.129552	0.0260178	0.268779	0.0384125	0.0787406	0.028548	0.0460531	0.169774	6	21	0.285714
SET	40189_at	0.851565	0.0089116	5.96e-05	0.0224533	0.201554	0.721856	0.734385	0.200698	0.0283867	0.739191	0.184994	0.858851	0.916676	0.535381	0.580419	0.014626	0.125891	0.368665	0.00545128	0.77546	0.673765	6	21	0.285714
RASSF7	40359_at	0.367429	0.728316	0.00675252	0.0144408	0.211606	0.0724395	0.297724	0.611852	0.0349071	0.235974	0.0738365	0.9465	0.955732	0.0826338	0.299409	0.169435	0.0379655	0.0060305	0.0165659	0.343637	0.420886	6	21	0.285714
FKBP8	40850_at	0.800186	0.710222	0.0135036	0.00563262	0.0110401	0.26415	0.99337	0.0577169	0.0187209	0.0121808	0.163421	0.0325936	0.133871	0.463534	0.389523	0.121995	0.121206	0.106736	0.116832	0.821753	0.106319	6	21	0.285714
KDM6B	41386_i_at	0.485463	0.298226	0.0132408	0.559631	0.343905	0.0444721	0.17347	0.310139	0.0448952	0.00399266	0.578864	0.0149724	0.365228	0.078006	0.654231	0.148546	0.459157	0.352466	0.00360201	0.303253	0.163217	6	21	0.285714
AC006483.1	AFFX-HSAC07/X00351_3_at	0.421223	0.012976	0.00283703	0.00268556	0.475913	0.824638	0.0778989	0.884133	0.00237754	0.736136	0.64245	0.183031	0.210052	0.184266	0.237626	0.0892804	0.0572939	0.0583007	0.544408	0.0305652	0.0259054	6	21	0.285714
RPL34	200026_at				0.0337092	0.726391	0.190904	0.220863	0.99247	0.19404	0.65788	0.263687	0.0169841	0.528396	0.0267443	0.740495	0.00147288	0.368931	0.338151	0.59223	0.0222106	0.0683002	5	18	0.277778
C22orf28	200042_at				0.00521961	0.320831	0.996445	0.177958	0.170352	0.013811	0.208067	0.472609	0.225194	0.531761	0.539562	0.607147	0.180848	0.0314964	0.038897	0.00287169	0.667485	0.714857	5	18	0.277778
RPL30	200062_s_at				0.0217904	0.96103	0.146599	0.136972	0.649832	0.0187021	0.675507	0.958232	0.170778	0.370545	0.345809	0.544536	0.00687848	0.385548	0.96937	0.00144393	0.396867	0.0484559	5	18	0.277778
CTD-2287O16.1	200091_s_at				0.0115722	0.876176	0.619269	0.17057	0.666293	0.109364	0.481401	0.703173	0.0419135	0.729036	0.0426531	0.429356	0.00611229	0.896971	0.75071	0.397732	0.0979397	0.0254383	5	18	0.277778
ACTN4	200601_at				0.0449235	0.897602	0.754238	0.371659	0.501015	4.19e-05	0.258029	0.433717	0.10855	0.122007	0.0835424	0.0891563	0.41849	0.0358607	0.0580817	0.0308432	0.503881	0.0451339	5	18	0.277778
AP2B1	200615_s_at				0.797341	0.419003	0.256965	0.443959	0.0395496	0.479769	0.705762	0.488644	0.0248515	0.0266132	0.160362	0.199537	0.0226484	0.0397683	0.0770095	0.407643	0.853073	0.0524508	5	18	0.277778
P4HB	200656_s_at				0.0148005	0.457658	0.165132	0.50093	0.623544	0.0418128	0.846711	0.135878	0.397578	0.690229	0.139658	0.318437	0.175445	0.0715441	0.0308006	0.00277752	0.249441	0.00242801	5	18	0.277778
CTSA	200661_at				0.497042	0.800035	0.152371	0.318428	0.274827	0.00221447	0.0876154	0.0377606	0.0262938	0.0389632	0.78886	0.852496	0.82121	0.502169	0.825744	0.238164	0.190869	0.0262506	5	18	0.277778
SF3B3	200687_s_at				5.73e-05	0.869014	0.151757	0.27763	0.189712	0.0223427	0.890283	0.115435	0.000278581	0.00947775	0.00367761	0.11824	0.168697	0.100999	0.287678	0.61854	0.107756	0.542292	5	18	0.277778
SKP1	200719_at				0.0121484	0.0190834	0.0920317	0.40081	0.111536	0.982223	0.118709	0.647438	0.0125741	0.106881	0.134573	0.35176	0.0606537	0.0184742	0.0274846	0.206684	0.534164	0.124406	5	18	0.277778
ARL6IP5	200761_s_at				0.0171986	0.167514	0.0486334	0.759513	0.262689	0.00592219	0.841891	0.213635	0.712711	0.251666	0.66266	0.31365	0.0352477	0.633114	0.343759	0.229602	0.294367	0.0259721	5	18	0.277778
LAMC1	200771_at				0.0289467	0.0692145	0.0462028	0.633867	0.514737	0.374748	0.407407	0.668336	0.225676	0.955657	0.0163742	0.030249	0.0149606	0.819679	0.516369	0.0736789	0.177615	0.640629	5	18	0.277778
EPRS	200842_s_at				0.0187796	0.826124	0.123901	0.814348	0.0193128	0.0235898	0.0163584	0.262517	0.54068	0.995476	0.186161	0.60003	0.0452048	0.35493	0.843689	0.491899	0.424647	0.405852	5	18	0.277778
PSAP	200871_s_at				0.703301	0.786826	0.443861	0.216705	0.62821	0.0123696	0.42215	0.623104	0.379066	0.787279	0.00995473	0.040261	0.412745	0.315542	0.0482074	0.705694	0.0461308	0.0620501	5	18	0.277778
CKB	200884_at				0.34333	0.985926	0.53971	0.622794	0.160982	0.0405725	0.0570008	0.521009	0.000826678	0.0256961	0.16536	0.609061	0.825801	0.0441803	0.14856	0.166138	0.253709	0.0138218	5	18	0.277778
RPLP2	200909_s_at				0.000657285	0.551168	0.241161	0.00367787	0.606093	0.375509	0.654452	0.922544	0.0332369	0.902328	0.0196611	0.599344	0.428511	0.195881	0.0378895	0.988266	0.662717	0.169396	5	18	0.277778
GLUD1	200946_x_at				0.000696813	0.569159	0.268431	0.797991	0.612788	0.833427	0.312161	0.793824	0.0415402	0.74806	0.186389	0.550473	0.432161	0.0161229	0.0494399	0.0201881	0.65457	0.0676475	5	18	0.277778
ACTR3	200996_at				0.210831	0.0196372	0.56796	0.970588	0.526396	0.169601	0.599322	0.366776	0.488665	0.821677	0.644521	0.0464463	0.00608806	0.0549501	0.0813245	0.0362353	0.292826	0.0007323	5	18	0.277778
EIF1AP1	201016_at				0.0313385	0.346934	0.0853026	0.229591	0.0267819	0.0137247	0.945161	0.655534	0.0374881	0.116588	0.886462	0.800093	0.0225899	0.233634	0.376452	0.102875	0.981684	0.107884	5	18	0.277778
EIF1AX	201017_at				0.0016689	0.350144	0.0521688	0.0200572	0.0516673	0.00122002	0.633596	0.517857	0.600535	0.300169	0.809526	0.911028	0.126157	0.26197	0.374663	0.00229795	0.463638	0.0109837	5	18	0.277778
CD99	201028_s_at				0.026107	0.0140403	0.517072	0.339976	0.926172	0.262623	0.365308	0.0477272	0.161605	0.799224	0.0655376	0.29236	0.72597	0.0541526	0.0710583	0.00166344	0.230253	0.0277564	5	18	0.277778
PSMF1	201053_s_at				0.79799	0.166069	0.0802182	0.310395	0.1617	0.0120125	0.985052	0.730749	0.207161	0.653102	0.850221	0.917947	0.04826	0.0179949	0.0250629	0.0211041	0.534555	0.714476	5	18	0.277778
ATP6V1B2	201089_at				0.038563	0.327253	0.887519	0.868137	0.238273	0.816338	0.719208	0.199765	0.42628	0.84563	0.343017	0.158972	0.480364	0.00994058	0.0123617	0.00363963	0.0894947	0.00502498	5	18	0.277778
GNAI3	201180_s_at				0.0440207	0.0598436	0.0199511	0.825782	0.140447	0.0323474	0.37381	0.838887	0.779999	0.952726	0.20099	0.283046	0.00597664	0.896049	0.347378	0.0218699	0.689341	0.215186	5	18	0.277778
CREG1	201200_at				0.681188	0.361719	0.796775	0.941178	0.0211896	0.159716	0.992484	0.284744	0.454888	0.290032	0.643988	0.902405	0.117055	0.046074	0.126245	0.00122998	0.00245621	0.000826479	5	18	0.277778
PCNA	201202_at				0.30777	0.725685	0.542953	0.0141872	0.103434	0.10715	0.762882	0.232966	0.4281	0.0231646	0.460648	0.271699	0.00526531	0.133999	0.470604	0.0041856	0.00796536	0.105524	5	18	0.277778
LGMN	201212_at				0.166825	0.129169	0.0270994	0.934013	0.357107	0.228701	0.377396	0.0397863	0.970843	0.41669	0.0388761	0.422976	0.422032	0.647673	0.580593	0.968454	0.0111127	0.00460654	5	18	0.277778
SNRNP70	201221_s_at				6.42e-05	0.297367	0.443186	0.930518	0.924207	0.178585	0.613325	0.995026	0.301479	0.762579	0.164117	0.881808	0.00513945	0.0205628	0.284708	0.0153129	0.76121	0.0157664	5	18	0.277778
RP11-255B23.1	201224_s_at				0.0497099	0.777854	0.145302	0.785492	0.0215159	0.0469708	0.136383	0.0710529	0.451392	0.652932	0.545828	0.842146	0.0483861	0.843941	0.664418	0.00427726	0.39051	0.226058	5	18	0.277778
SRRM1	201225_s_at				7.93e-06	0.439899	0.0266003	0.716843	0.151935	0.0420546	0.0371983	0.973235	0.0674507	0.0784401	0.451564	0.443697	0.524442	0.809211	0.423168	0.00116419	0.746119	0.514127	5	18	0.277778
PSMD13	201232_s_at				0.136722	0.532425	0.727805	0.281482	0.647196	0.043958	0.355338	0.786131	0.0066768	0.796399	0.0127477	0.989489	0.823023	0.00257699	0.019862	0.254807	0.535836	0.0792417	5	18	0.277778
ATP1B1	201243_s_at				0.104842	0.456248	0.382498	0.261458	0.574249	0.0133821	0.234456	0.272328	0.0919103	0.166987	0.0799674	0.109314	0.064353	0.206187	0.0432907	0.0344811	0.0113736	0.00136476	5	18	0.277778
COPE	201264_at				0.0347711	0.584785	0.149651	0.863346	0.701866	0.00174742	0.00764448	0.0478649	0.917733	0.815507	0.604767	0.510332	0.247592	0.571865	0.196576	0.00404693	0.571492	0.546344	5	18	0.277778
NDUFA5	201304_at				0.0120604	0.103861	0.255244	0.0996908	0.430631	0.168215	0.00544138	0.457288	0.224694	0.887653	0.491551	0.118928	0.00234034	0.0263471	0.0629586	0.00723728	0.364122	0.444955	5	18	0.277778
ADIPOR2	201346_at				0.0161955	0.193976	0.595182	0.522	0.602019	0.235314	0.586542	0.521792	0.298805	0.173824	0.415921	0.632095	0.0493728	0.0459665	0.302973	0.000750709	0.450045	0.0425106	5	18	0.277778
CUL3	201370_s_at				0.0239827	0.0428253	0.169019	0.970533	0.212069	0.0116851	0.234421	0.601819	0.877334	0.626614	0.811085	0.868306	0.0235697	0.0811752	0.0766549	0.000847874	0.834791	0.112653	5	18	0.277778
TRAM1	201398_s_at				0.0491067	0.361195	0.634475	0.829897	0.530728	0.00183429	0.0486504	0.844652	0.538113	0.682931	0.289695	0.320398	0.0398617	0.35947	0.300108	0.0164884	0.161882	0.140395	5	18	0.277778
MGST3	201403_s_at				0.0387588	0.666919	0.0306816	0.78221	0.947001	0.491548	0.0311238	0.0410222	0.206872	0.82047	0.0733603	0.305347	0.0461467	0.526138	0.864003	0.0710776	0.890593	0.356118	5	18	0.277778
PPP1CB	201409_s_at				0.298634	0.121439	0.036822	0.449347	0.698476	0.157573	0.260865	0.168377	0.446679	0.362874	0.0212709	0.0387501	0.012461	0.938354	0.415842	0.0646223	0.19226	0.0174472	5	18	0.277778
SOX4	201418_s_at				0.012415	0.38036	0.914888	0.241634	0.427065	0.0257558	0.902203	0.554023	0.00331354	0.0192223	0.420425	0.240786	0.099201	0.694791	0.19368	0.00171598	0.59017	0.874056	5	18	0.277778
BUB3	201458_s_at				0.249523	0.435063	0.0139435	0.179473	0.410708	0.00439368	0.0415064	0.770781	0.791274	0.767054	0.617717	0.579384	0.0871635	0.107817	0.172912	0.000455928	0.727023	0.0431948	5	18	0.277778
RCN2	201486_at				0.0917267	0.1354	0.114351	0.377432	0.326127	0.0156868	0.623612	0.605108	0.335372	0.448808	0.162783	0.390085	0.00350194	0.0455947	0.0506265	0.00441566	0.0394028	0.0528753	5	18	0.277778
TOMM70A	201519_at				0.0598554	0.146017	0.0503637	0.601077	0.139274	0.00262999	0.583628	0.271812	0.0349313	0.00997134	0.606922	0.970382	0.0206117	0.223515	0.0863739	0.00803651	0.298874	0.102276	5	18	0.277778
RPA1	201528_at				0.622546	0.0737908	0.0250516	0.853935	0.0392357	0.0213297	0.535573	0.372408	0.295585	0.956296	0.137243	0.489631	0.0309072	0.683524	0.528195	0.0125095	0.406285	0.203148	5	18	0.277778
ZFP36	201531_at				0.204574	0.867172	0.979039	0.0241733	0.952189	0.112278	0.220783	0.00792883	0.0120223	0.058219	0.0165799	0.0365507	0.501286	0.400736	0.659681	0.316243	0.311936	0.399189	5	18	0.277778
LAMP1	201552_at				2.46e-05	0.937332	0.219651	0.337802	0.319676	0.44848	0.00985257	0.578975	0.728641	0.591098	0.0983237	0.067073	0.320165	0.674464	0.930334	0.0359827	0.00213574	0.0312422	5	18	0.277778
FSCN1	201564_s_at				0.378306	0.0103862	0.0714952	0.255337	0.731404	0.170883	0.867867	0.815382	0.014885	0.0514425	0.0066071	0.00699452	0.875389	0.353685	0.910608	0.00593191	0.640194	0.453631	5	18	0.277778
GOLGA4	201567_s_at				0.0122723	0.184498	0.067319	0.397278	0.0282607	0.00259031	0.253017	0.627094	0.959725	0.743569	0.247265	0.41909	0.00215266	0.819266	0.320606	0.00515007	0.0506752	0.0883084	5	18	0.277778
FAT1	201579_at				0.0450955	0.796961	0.946453	0.732242	0.0964517	0.0103444	0.760285	0.806566	0.253761	0.223086	0.132854	0.179821	0.199205	0.228056	0.389448	0.00971345	0.021064	0.0176187	5	18	0.277778
ZC3H15	201593_s_at				0.0172363	0.930474	0.149789	0.819407	0.045995	0.0593087	0.0113244	0.123186	0.0964784	0.712766	0.0380763	0.362739	0.0314462	0.823892	0.486803	0.751133	0.760025	0.559473	5	18	0.277778
ZC3H15	201595_s_at				0.00407178	0.128224	0.337486	0.596073	0.0380703	0.0306505	0.68989	0.157221	0.643123	0.165983	0.668084	0.442705	0.00147185	0.232182	0.200037	0.000568355	0.184093	0.36651	5	18	0.277778
CNN2	201605_x_at				0.000420887	0.480556	0.472833	0.0209489	0.901631	0.0123252	0.754112	0.731782	0.566738	0.0672073	0.98873	0.519653	0.967418	0.0246601	0.143426	0.00507141	0.0719158	0.156226	5	18	0.277778
MARCKS	201670_s_at				0.000652918	0.0492652	0.75191	0.819965	0.650753	0.347083	0.0392121	0.611909	0.0417226	0.23751	0.0562052	0.263685	0.187688	0.43654	0.443624	0.70996	0.0506975	0.0233498	5	18	0.277778
PGRMC2	201701_s_at				0.00274586	0.275697	0.915005	0.498481	0.567314	0.0241494	0.247749	0.645001	0.659044	0.179505	0.967867	0.0775545	0.0005098	0.0703195	0.0596972	0.000223863	0.431953	0.0295506	5	18	0.277778
RANBP2	201713_s_at				0.00162037	0.399291	0.806528	0.574254	0.273504	0.0420466	0.847792	0.993443	0.458025	0.0348146	0.604051	0.951589	0.00559114	0.584252	0.350886	0.00361773	0.916421	0.684923	5	18	0.277778
LAPTM5	201720_s_at				0.183751	0.509843	0.159735	0.833493	0.333866	0.0621387	0.114635	0.102385	0.123773	0.00690009	0.379749	0.260061	0.0905747	0.0627611	0.0252757	0.0337067	0.0194697	0.00220266	5	18	0.277778
ADNP	201773_at				0.0193147	0.405947	0.112634	0.083752	0.883432	0.00232781	0.838132	0.190536	0.48904	0.69415	0.797377	0.811157	0.0453986	0.550658	0.19644	0.00285669	0.131243	0.0370876	5	18	0.277778
BNIP3	201849_at				0.543317	0.189851	0.551583	0.801971	0.720933	0.00383847	0.647086	0.191168	0.0233378	0.227899	0.115666	0.196745	0.0269901	0.164991	0.16076	0.0398404	0.00218671	0.778676	5	18	0.277778
LRRFIP1	201861_s_at				0.0145251	0.0989661	0.619244	0.250997	0.0694567	0.0219228	0.0265989	0.137006	0.000359859	0.0845581	0.00209577	0.134757	0.181981	0.324754	0.29545	0.987133	0.392348	0.203488	5	18	0.277778
LRRFIP1	201862_s_at				0.893182	0.0149487	0.649016	0.0231016	0.463128	0.965776	0.669446	0.78832	0.104543	0.150589	0.0197419	0.0248177	0.692905	0.747703	0.50859	0.297878	0.313128	0.0103411	5	18	0.277778
SEC63	201915_at				0.147727	0.395404	0.334833	0.175503	0.165572	0.0115147	0.114601	0.82364	0.691292	0.896936	0.0216471	0.243093	0.0194902	0.138682	0.0321431	0.0548043	0.870383	0.0107002	5	18	0.277778
ARPC1B	201954_at				0.204576	0.827082	0.121576	0.293634	0.673217	0.00053889	0.167421	0.100572	0.0116841	0.0287746	0.0681167	0.234413	0.372184	0.124517	0.447461	0.68374	0.0140109	0.0299819	5	18	0.277778
MYO10	201976_s_at				0.038217	0.215497	0.719013	0.200386	0.57558	0.143354	0.566152	0.80236	0.109922	0.0324286	0.670728	0.45059	0.0241334	0.00586762	0.000896586	0.826186	0.245412	0.583238	5	18	0.277778
KIAA0196	201985_at				0.347693	0.241542	0.0298805	0.436302	0.162418	0.0103983	0.469762	0.23109	0.0750265	0.171336	0.716719	0.521275	0.118825	0.0938312	0.238203	0.00581975	0.00600038	0.00342984	5	18	0.277778
RAI14	202052_s_at				0.00620993	0.275769	0.0103157	0.869496	0.744281	0.309011	0.397612	0.0880491	0.00222025	0.277295	0.000957796	0.0636944	0.884264	0.241026	0.15413	0.105935	0.0413973	0.0962596	5	18	0.277778
CTR9	202060_at				0.0131272	0.0825255	0.24291	0.81956	0.0591176	0.0256143	0.96973	0.457464	0.0765411	0.355672	0.840647	0.830525	0.000870289	0.500807	0.3288	0.0023056	0.631872	0.0327133	5	18	0.277778
PRPF4B	202126_at				0.270258	0.0313046	0.240334	0.986201	0.226102	0.000271976	0.529432	0.958463	0.915573	0.56406	0.786677	0.643492	0.0214901	0.776377	0.301696	0.00667012	0.835866	0.0135683	5	18	0.277778
NEDD9	202149_at				0.0647751	0.364629	0.481269	0.495929	0.695543	0.752506	0.122346	0.462303	0.213885	0.00343884	0.342217	0.00465641	0.00173111	0.00101582	0.000689959	0.064975	0.534585	0.0761673	5	18	0.277778
PPP1R2	202165_at				0.000332716	0.134022	0.0811235	0.546109	0.715462	0.219844	0.118361	0.0413033	0.0434941	0.453298	0.168754	0.896111	0.0171635	0.652279	0.904563	0.0174698	0.0531146	0.18643	5	18	0.277778
CRK	202225_at				0.0247382	0.076477	0.257617	0.169847	0.630848	0.932337	0.919637	0.475536	0.447427	0.583987	0.769183	0.545606	0.0199454	0.157239	0.628773	0.0144607	0.0168046	0.0114592	5	18	0.277778
PDAP1	202290_at				4.46e-06	0.655489	0.0275987	0.445864	0.738081	0.403235	0.00162786	0.0170934	0.742892	0.879721	0.505786	0.728647	0.363431	0.351126	0.0253822	0.932071	0.525521	0.965882	5	18	0.277778
FEZ2	202305_s_at				0.358464	0.923767	0.698986	0.330584	0.00355831	0.00312755	0.715619	0.228567	0.125749	0.588254	0.275758	0.982566	0.0959958	0.00261935	0.0185514	0.599053	0.647387	0.0183697	5	18	0.277778
MTHFD1	202309_at				0.651076	0.30516	0.925907	0.639487	0.0847463	0.000291187	0.497015	0.514138	0.00054963	0.122477	0.075645	0.563224	0.549448	0.0142671	0.0290034	0.218111	0.0114375	0.116086	5	18	0.277778
GGPS1	202322_s_at				0.00737993	0.033538	0.0155828	0.910996	0.40411	0.202851	0.628706	0.20661	0.0917649	0.204408	0.133908	0.270998	0.0202425	0.669225	0.924317	0.0257299	0.282117	0.662878	5	18	0.277778
PAM	202336_s_at				0.0378271	0.919641	0.109981	0.983755	0.182496	0.0603294	0.15756	0.00848033	0.0169674	0.0852067	0.757458	0.564663	0.0561394	0.171996	0.560583	0.00483521	0.0880134	0.011023	5	18	0.277778
FABP5	202345_s_at				0.000123895	0.571986	0.149475	0.848017	0.529952	0.0497707	0.214859	0.15556	0.0927941	0.0259787	0.0511283	0.00602687	0.419586	0.485397	0.269458	0.0155198	0.570335	0.0797424	5	18	0.277778
SNX19	202359_s_at				0.997272	0.0450589	0.821543	0.89264	0.0224679	0.434011	0.0534168	0.0646181	0.0847986	0.0359134	0.706502	0.973302	0.814071	0.0126667	0.0711936	0.209034	0.163521	0.0160743	5	18	0.277778
CBFB	202370_s_at				0.965673	0.607067	0.0184378	0.511882	0.786388	0.00378179	0.319769	0.415266	0.020193	0.0967672	0.592299	0.895107	0.0621982	0.802398	0.273085	0.00886536	0.07669	0.00741135	5	18	0.277778
RAB3GAP2	202374_s_at				5.3e-06	0.240454	0.216129	0.147686	0.25247	0.919854	0.0120737	0.0357102	0.43261	0.507583	0.645232	0.458727	0.986606	0.236824	0.542419	0.0104148	0.539502	0.04699	5	18	0.277778
TCOF1	202385_s_at				0.425829	0.0108844	0.757068	0.145835	0.504604	0.924323	0.404175	0.634126	0.401649	0.348185	0.226629	0.654611	0.472415	0.00756226	0.0201553	0.0180356	0.0188221	0.159241	5	18	0.277778
RXRA	202426_s_at				0.0440057	0.82827	0.0490027	0.748315	0.0875927	0.00554098	0.503409	0.621739	0.78575	0.852931	0.533152	0.467039	0.198496	0.290898	0.40985	0.0425246	0.180194	0.0288153	5	18	0.277778
CYP1B1	202436_s_at				0.0071142	0.106104	0.142199	0.276599	0.0834351	0.318576	0.445308	0.352351	0.135858	0.722637	0.0191517	0.181983	0.0245659	0.027027	0.10024	0.675595	0.260953	0.0087822	5	18	0.277778
PCOLCE	202465_at				0.0305701	0.24342	0.0194599	0.46893	0.119743	0.992487	0.0168685	0.626031	0.0369233	0.208404	0.155639	0.917215	0.503751	0.35976	0.436801	0.0341295	0.112454	0.150298	5	18	0.277778
COPS2	202467_s_at				0.553013	0.234111	0.0376243	0.189107	0.373806	0.00620792	0.308282	0.959478	0.0761822	0.0410809	0.750942	0.36997	0.00799293	0.150641	0.338196	0.00326706	0.623604	0.474016	5	18	0.277778
TBCC	202495_at				0.0367875	0.790397	0.0421547	0.313098	0.183462	0.0218216	0.683164	0.995222	0.849447	0.0473279	0.669077	0.156752	0.442273	0.707525	0.264544	0.0307741	0.289151	0.278764	5	18	0.277778
ACADM	202502_at				0.33933	0.122158	0.502615	0.0286165	0.146478	0.0124814	0.824755	0.200568	0.0210864	0.669318	0.897131	0.101807	0.331003	0.290482	0.117598	0.00210742	0.0158447	0.928957	5	18	0.277778
IRF1	202531_at				0.00460683	0.650931	0.382827	0.00339041	0.911354	0.0127212	0.842014	0.905367	0.571834	0.456124	0.517771	0.498672	0.985749	0.0839666	0.295284	0.493566	0.0181744	0.00843678	5	18	0.277778
AK1	202587_s_at				0.00451825	0.700101	0.446813	0.972306	0.884025	0.605797	0.554196	0.89843	0.0229168	0.24341	0.190851	0.59776	0.253431	0.00382671	0.00953933	0.864644	0.530618	0.0481874	5	18	0.277778
TYMS	202589_at				0.81507	0.838579	0.617397	0.384417	0.0199225	0.0158715	0.134963	0.181497	0.823972	0.628901	0.622246	0.34043	0.0226661	0.587303	0.667955	0.913348	0.00608483	0.011662	5	18	0.277778
ENSA	202596_at				0.00119548	0.898539	0.383425	0.599214	0.876223	0.579417	0.642139	0.931818	0.0132892	0.0315046	0.0477662	0.126915	0.121013	0.459418	0.431416	0.0480618	0.436105	0.168842	5	18	0.277778
APPBP2	202629_at				0.0120053	0.00416277	0.0382823	0.889784	0.422016	5.5e-05	0.768172	0.971734	0.637106	0.7509	0.792538	0.672653	0.0432847	0.142859	0.216216	0.0561953	0.794078	0.2491	5	18	0.277778
NRAS	202647_s_at				0.126272	0.0548653	0.0239117	0.842863	0.122385	0.142349	0.920585	0.532921	0.127149	0.632293	0.361239	0.656307	0.10912	0.00187869	0.00822061	0.069199	0.0177365	0.00589682	5	18	0.277778
RNMT	202683_s_at				0.130067	0.489183	0.0934867	0.238342	0.720762	0.0167141	0.888458	0.331163	0.0620426	0.0988226	0.285117	0.562355	0.327933	0.00315516	0.0124302	0.0179588	0.652335	0.0145482	5	18	0.277778
STK17A	202693_s_at				0.885915	0.0468649	0.141334	0.000839731	0.882021	0.754854	0.995396	0.536995	0.688795	0.983338	0.863764	0.753405	0.0053368	0.719041	0.893671	0.0720926	0.00207106	0.0236455	5	18	0.277778
WRB	202749_at				0.686759	0.0346385	0.0656495	0.0779694	0.536489	0.542415	0.998823	0.405137	0.0325429	0.000724096	0.340825	0.162674	0.142537	0.63825	0.32769	0.00670237	0.0192139	0.187034	5	18	0.277778
AKAP2	202759_s_at				0.00600309	0.823484	0.428292	0.647851	0.0384246	0.272645	0.871862	0.2181	0.567936	0.0322451	0.735998	0.0468553	0.0714713	0.883739	0.815508	0.0141334	0.19442	0.0517223	5	18	0.277778
SFSWAP	202774_s_at				0.28721	0.568721	0.445839	0.659514	0.0136726	0.2997	0.0200789	0.172251	0.01396	0.680336	0.0697607	0.717163	0.349675	0.573802	0.736028	0.0350679	0.374967	0.00380121	5	18	0.277778
POP4	202868_s_at				0.281526	0.252339	0.225943	0.0410117	0.813007	0.268408	0.907445	0.853979	0.237875	0.0338027	0.470949	0.0158502	0.0334367	0.315394	0.711832	0.0128765	0.314062	0.374874	5	18	0.277778
PBX2	202876_s_at				4.95e-05	0.0513579	0.0850276	0.789123	0.190837	0.31573	0.00118427	0.217059	0.453857	0.0387513	0.696289	0.00424519	0.599189	0.45178	0.940402	0.131143	0.469265	0.0474903	5	18	0.277778
ANPEP	202888_s_at				0.188204	0.445203	0.159448	0.040601	0.316911	0.0765673	0.857553	0.55905	0.283969	0.0214989	0.838098	0.08706	0.456862	0.0319212	0.0428619	0.178575	0.0622932	0.00932115	5	18	0.277778
MAP7	202890_at				0.292603	0.402877	0.419389	0.975886	0.0502461	0.0238332	0.198616	0.350383	0.182244	0.0207377	0.971621	0.758682	0.00979979	0.506559	0.87935	0.00257096	0.465956	0.000328053	5	18	0.277778
SIRPA	202897_at				0.393289	0.0996545	0.161641	0.425849	0.0573865	0.432287	0.0377748	0.262376	0.181951	0.520189	0.43992	0.264171	0.0383855	0.0214613	0.020818	0.937506	0.107284	0.0365254	5	18	0.277778
EPM2AIP1	202909_at				0.510532	0.981344	0.0269266	0.158755	0.49336	0.016793	0.857067	0.218538	0.01638	0.144549	0.0139342	0.106418	0.0354939	0.439279	0.417614	0.0690625	0.642254	0.280106	5	18	0.277778
GCLC	202922_at				0.502243	0.455099	0.0402307	0.437875	0.57472	0.0620149	0.0700414	0.985521	0.0143867	0.0373291	0.612416	0.957208	0.0110961	0.0069334	0.0745903	0.0932024	0.963237	0.119756	5	18	0.277778
NAGA	202943_s_at				0.771487	0.904969	0.110697	0.919786	0.170074	0.128285	0.0241507	0.00915165	0.718541	0.455957	0.948368	0.471319	0.653393	0.0389469	0.0234641	0.601606	0.00495767	0.191923	5	18	0.277778
CRYZ	202950_at				0.0421121	0.0326188	0.00287164	0.603693	0.691022	0.152288	0.693485	0.353029	0.587619	0.585899	0.788329	0.920796	0.0265558	0.581856	0.754063	0.00890544	0.858671	0.876835	5	18	0.277778
C1QB	202953_at				0.0195358	0.247696	0.0892565	0.818268	0.510494	0.179144	0.348093	0.795114	0.353212	0.399678	0.348017	0.307087	0.233934	0.00552751	0.00402577	0.0516259	0.000863709	0.00243955	5	18	0.277778
ARFGEF1	202956_at				0.0152307	0.660224	0.0299326	0.72828	0.213683	0.0206241	0.620353	0.466236	0.853487	0.806836	0.228851	0.464781	0.552983	0.325286	0.482185	0.0225719	0.736803	0.00441508	5	18	0.277778
HCLS1	202957_at				0.546609	0.255687	0.593306	0.291327	0.312482	0.0393022	0.495813	0.213005	0.019871	0.0129617	0.254417	0.172451	0.0933346	0.995695	0.924213	0.973177	0.00554891	0.00153783	5	18	0.277778
CREBZF	202979_s_at				0.00745544	0.828068	0.706107	0.477441	0.329689	0.0062644	0.227997	0.753077	0.979013	0.936974	0.694915	0.925438	0.0191254	0.266291	0.55363	0.00569683	0.719171	0.0130458	5	18	0.277778
BAG5	202984_s_at				0.380678	0.278872	0.45133	0.112876	0.797752	0.0312305	0.0435303	0.418127	0.179433	0.275588	0.82048	0.967729	0.0866961	0.0115637	0.0196699	0.0145944	0.722196	0.713309	5	18	0.277778
IMPA1	203011_at				0.0336069	0.0765716	0.121074	0.027479	0.0511572	0.0407813	0.885672	0.192604	0.750314	0.664615	0.806113	0.402783	0.609673	0.0647964	0.025372	0.00269016	0.722096	0.25396	5	18	0.277778
SSX2IP	203016_s_at				0.841621	0.323698	0.389341	0.161516	0.37947	0.0059724	0.611074	0.327296	0.0247584	0.68521	0.475261	0.3226	0.0129024	0.184713	0.86858	0.0404523	0.188646	0.0144706	5	18	0.277778
LAMP2	203042_at				0.98132	0.320482	0.278998	0.916602	0.0379578	0.564111	0.717882	0.465823	0.43943	0.351776	0.868747	0.672863	0.00300236	0.312859	0.319266	0.030489	0.0302848	0.0116264	5	18	0.277778
PDHX	203067_at				0.808901	0.0789248	0.422614	0.745667	0.259149	0.0156382	0.0230967	0.0711441	0.396003	0.521448	0.181041	0.248978	0.0212984	0.0763997	0.040127	0.00240982	0.117907	0.291368	5	18	0.277778
COG2	203073_at				3.56e-06	0.211185	0.1518	0.925653	0.0548865	0.0258463	0.382662	0.217933	0.0664251	0.412449	0.330914	0.465574	0.0773852	0.0178837	0.00895362	0.00460406	0.991121	0.992619	5	18	0.277778
UBE2M	203109_at				0.000146362	0.893328	0.0305314	0.508151	0.833856	0.000317858	0.0327617	0.559857	0.277358	0.432561	0.343035	0.485582	0.293763	0.888487	0.339898	0.000157406	0.339093	0.316071	5	18	0.277778
SEC61B	203133_at				0.0204791	0.645175	0.352651	0.0098606	0.495106	0.91426	0.424662	0.657376	0.112602	0.461536	0.02521	0.293893	0.00186602	0.539434	0.908958	0.0287221	0.79008	0.765613	5	18	0.277778
RABAC1	203136_at				0.296794	0.57077	0.223281	0.79158	0.750706	0.00598375	0.542301	0.494322	0.00330825	0.868498	0.0203877	0.986352	0.366358	0.264644	0.0317418	0.0111778	0.695397	0.0861671	5	18	0.277778
MTRR	203200_s_at				0.81312	0.0192351	0.0998149	0.51397	0.777203	0.00057819	0.903053	0.146697	0.012792	0.295555	0.833857	0.991675	0.0276066	0.480738	0.210077	0.00664461	0.250064	0.572789	5	18	0.277778
DYNLT3	203303_at				0.950381	0.0156642	0.0831805	0.267676	0.427913	0.0257527	0.305676	0.702904	0.801652	0.979008	0.492866	0.356509	0.00704061	0.371402	0.406695	0.0108541	0.123193	0.000393462	5	18	0.277778
ADNP2	203322_at				0.000514749	0.648632	0.498104	0.712044	0.259927	0.107888	0.00299244	0.0729514	0.00333677	0.174972	0.0372975	0.617123	0.0911307	0.117143	0.185744	0.0118319	0.324074	0.517136	5	18	0.277778
SLC25A12	203339_at				0.0218863	0.110221	0.0105841	0.79486	0.914579	0.0407812	0.747689	0.491531	0.234978	0.177444	0.536104	0.469359	0.500373	0.196042	0.0280006	0.021967	0.323385	0.242755	5	18	0.277778
PDLIM7	203369_x_at				0.022468	0.67053	0.03667	0.417793	0.18003	0.00167191	0.874869	0.537241	0.757997	0.895002	0.860271	0.674554	0.540815	0.0145754	0.0194105	0.100941	0.53422	0.480221	5	18	0.277778
PDLIM7	203370_s_at				0.00121136	0.369265	0.0500644	0.787205	0.0389927	0.00759137	0.0724516	0.177504	0.0327445	0.192972	0.0766856	0.211034	0.167819	0.111583	0.170514	0.0315987	0.162935	0.165072	5	18	0.277778
CD53	203416_at				5.44e-05	0.120485	0.32808	0.419996	0.445706	0.646642	0.346056	0.00787852	0.185428	0.0441638	0.6529	0.312278	0.0740526	0.103272	0.114391	0.281925	0.0102802	0.000566834	5	18	0.277778
ASF1A	203427_at				0.011276	0.067083	0.314542	0.745801	0.275105	0.00135271	0.771762	0.215656	0.979052	0.297476	0.372179	0.920582	0.00759754	0.0704611	0.0162288	0.00100438	0.114504	0.104876	5	18	0.277778
ABCA1	203504_s_at				0.00342234	0.232773	0.469821	0.784338	0.191673	0.438464	0.328479	0.537969	0.00763655	0.0724053	0.00045376	0.0289202	0.11077	0.0587927	0.440474	0.0884842	0.22809	0.048077	5	18	0.277778
S100A9	203535_at				0.767611	0.271209	0.017969	0.0463543	0.346135	0.000168995	0.482906	0.153094	0.321686	0.0321255	0.776518	0.365462	0.929976	0.000119554	0.0558041	0.0598385	0.203814	0.66795	5	18	0.277778
FEZ1	203562_at				0.768415	0.860088	0.0287651	0.757019	0.781462	0.421501	0.214795	0.309515	0.0169751	0.46129	0.986876	0.390496	0.045858	0.63333	0.71135	0.0915995	0.000150608	0.00131652	5	18	0.277778
RTCA	203594_at				0.0800288	0.0513102	0.534135	0.140562	0.0222523	0.239499	0.442993	0.800718	0.567091	0.856544	0.568464	0.944148	0.0152258	0.00131528	0.00106928	0.0147249	0.67386	0.763446	5	18	0.277778
UTP14C	203614_at				4.98e-06	0.710275	0.148842	0.0399236	0.63765	0.0176558	0.774764	0.434377	0.0631667	0.0306983	0.50319	0.186458	0.104323	0.16483	0.271512	0.0033188	0.869483	0.120935	5	18	0.277778
COG5	203630_s_at				0.00457257	0.982767	0.0090732	0.398856	0.305864	0.0356895	0.838623	0.205799	0.62792	0.558335	0.843599	0.702264	0.00884384	0.572364	0.839433	0.00266748	0.569254	0.568397	5	18	0.277778
FDX1	203646_at				0.499798	0.101582	0.841928	0.111175	0.0290886	0.0785083	0.98071	0.543243	0.584569	0.894594	0.328921	0.4189	0.0244995	0.0464794	0.057572	0.0178977	0.0291553	0.0705736	5	18	0.277778
TMOD1	203661_s_at				0.352455	0.140497	0.278602	0.0949382	0.981702	0.00447045	0.312659	0.446076	0.0299749	0.909768	0.10592	0.8294	0.411675	0.0334763	0.0199395	0.0244624	0.439744	0.904576	5	18	0.277778
COX5A	203663_s_at				6.71e-08	0.614026	0.191616	0.718349	0.818557	0.979699	0.983661	0.718851	0.506502	0.448324	0.0557495	0.0485032	0.0415848	0.0715634	0.0205483	0.00669559	0.472938	0.518815	5	18	0.277778
HMOX1	203665_at				9.42e-06	0.284205	0.0220336	0.3296	0.518739	0.133514	0.790247	0.317804	0.120924	0.0094956	0.109793	0.757206	0.240434	0.207721	0.893671	0.23187	0.0232273	0.0126817	5	18	0.277778
TMED1	203679_at				0.0925944	0.171523	0.19416	0.163056	0.535112	0.00370056	0.924284	0.599261	0.024414	0.425366	0.0141641	0.234081	0.455098	0.0461552	0.0793764	0.0153939	0.996207	0.651229	5	18	0.277778
JUND	203751_x_at				6.82e-05	0.792171	0.0850473	0.61918	0.16432	0.0157038	0.0446682	0.0291237	0.718746	0.846398	0.635966	0.825301	0.958868	0.0772232	0.0107945	0.689789	0.679737	0.780681	5	18	0.277778
LMOD1	203766_s_at				0.0813524	0.77057	0.650655	0.590378	0.81522	0.555946	0.806924	0.723693	0.00492466	0.400554	0.378336	0.323752	0.153891	0.01088	0.00455065	0.00334851	0.0422617	0.0845419	5	18	0.277778
BCL7A	203796_s_at				0.227291	0.792956	0.0977783	0.778068	0.255595	0.809949	0.00738592	0.16958	0.00718894	0.390314	0.00287947	0.477717	0.40703	0.129655	0.043476	0.00290179	0.775314	0.193121	5	18	0.277778
USP46	203870_at				0.0288616	0.346029	0.882958	0.448652	0.0642814	0.00193747	0.368404	0.35344	0.586218	0.35778	0.739526	0.0908579	0.0344925	0.193062	0.0566489	0.0312438	0.696261	0.0137955	5	18	0.277778
ACVR1	203935_at				0.158928	0.0479809	0.260567	0.13035	0.0446477	0.0694236	0.726096	0.622062	0.316429	0.985345	0.445601	0.911545	0.00163233	0.619104	0.927747	0.0122273	0.078598	0.0421796	5	18	0.277778
INTS9	203941_at				0.00718664	0.381409	0.0157989	0.278879	0.0710337	0.0139055	0.346186	0.359233	0.255544	0.254999	0.386271	0.54064	0.0110161	0.663373	0.976445	0.613034	0.0368219	0.207905	5	18	0.277778
PEX3	203970_s_at				0.0638381	0.329649	0.0451354	0.353741	0.267394	0.00554666	0.100988	0.916668	0.0102041	0.398894	0.407268	0.968867	0.0788936	0.02173	0.139969	0.00281549	0.281373	0.183434	5	18	0.277778
PEX3	203972_s_at				0.000447297	0.178968	0.128069	0.919967	0.126376	0.0144037	0.889855	0.1038	0.0079502	0.00469682	0.157618	0.240195	0.710221	0.460359	0.424884	0.000487985	0.176694	0.300607	5	18	0.277778
KRAS	204009_s_at				0.362639	0.0107115	0.110419	0.779042	0.259411	0.000204092	0.655732	0.667723	0.335332	0.520273	0.919485	0.983084	0.00196485	0.886349	0.490298	0.0277965	0.305025	0.0257743	5	18	0.277778
PTEN	204053_x_at				0.0457454	0.018069	0.827583	0.889559	0.992252	0.063425	0.688847	0.441471	0.26665	0.777339	0.918939	0.601521	0.00802844	0.0692406	0.0997357	0.0166685	0.0340355	0.328291	5	18	0.277778
ME1	204058_at				0.172599	0.481002	0.218302	0.843474	0.137437	0.0438071	0.612089	0.278786	0.86553	0.910724	0.0025896	0.0191639	0.00418119	0.148879	0.320353	0.0193918	0.176542	0.220842	5	18	0.277778
CD48	204118_at				0.51427	0.231878	0.486068	0.446798	0.618207	0.0392937	0.373759	0.76557	0.317552	0.0664932	0.344186	0.0585146	0.0609136	0.387466	0.0391947	0.0291904	0.0086315	0.0497427	5	18	0.277778
FILIP1L	204135_at				0.0433615	0.235297	0.16242	0.176571	0.843592	0.0244729	0.800338	0.337466	0.613238	0.404377	0.637659	0.887431	0.00265797	0.590301	0.558304	0.426635	0.00442554	0.0375179	5	18	0.277778
CDKN2C	204159_at				0.847447	0.919027	0.303551	0.613061	0.124533	0.317236	0.637565	0.479642	0.0173752	0.0083907	0.452328	0.491785	0.327884	0.0249164	0.00435803	0.189215	0.00621039	0.31305	5	18	0.277778
RARG	204188_s_at				0.527981	0.257914	0.764801	0.406585	0.52686	0.0469403	0.130018	0.0190423	0.00513392	0.162792	0.0642468	0.798893	0.472766	0.0340277	0.370221	0.00774963	0.389936	0.128194	5	18	0.277778
ZC3H14	204216_s_at				0.0496178	0.623859	0.108992	0.471597	0.897581	0.0152556	0.359417	0.397931	0.0048462	0.264772	0.0371236	0.153307	0.909179	0.806627	0.648824	0.00518921	0.110504	0.0671953	5	18	0.277778
RTN2	204217_s_at				0.90827	0.302929	0.0296042	0.769877	0.160479	0.182243	0.00961955	0.5031	0.0255832	0.9686	0.0924951	0.899503	0.634801	0.247674	0.236362	0.00141343	0.260829	0.0359382	5	18	0.277778
GLIPR1	204222_s_at				0.0223415	0.599336	0.839102	0.933149	0.0463188	0.902707	0.862498	0.279509	0.151001	0.362119	0.179975	0.452689	0.403469	0.0554828	0.0020593	0.193317	0.0124195	0.00762657	5	18	0.277778
STAU2	204226_at				0.00265287	0.00432892	0.145037	0.463067	0.347667	0.00382322	0.693755	0.329953	0.801221	0.574738	0.752511	0.628072	0.00827373	0.477545	0.932802	0.210181	0.319309	0.0254645	5	18	0.277778
FCER1G	204232_at				0.869778	0.911091	0.339233	0.806597	0.272686	0.0694429	0.377995	0.0114273	0.573508	0.988885	0.551555	0.678545	0.161654	0.0942585	0.0403623	0.0437325	0.0414842	0.00220554	5	18	0.277778
LMO2	204249_s_at				0.378803	0.0825751	0.0621513	0.399515	0.45435	0.0227801	0.701568	0.96277	0.0150676	0.078862	0.0251412	0.205351	0.0551159	0.855858	0.539219	0.0432222	0.00848148	0.122373	5	18	0.277778
PMAIP1	204285_s_at				0.029364	0.489122	0.485914	0.0451244	0.853436	0.617291	0.792576	0.890512	0.0144738	0.0707068	0.00259863	0.0137379	0.242302	0.691901	0.217379	0.972594	0.131504	0.717691	5	18	0.277778
ALDH6A1	204290_s_at				0.784759	0.651779	0.253793	0.0469254	0.287572	0.215042	0.446796	0.276752	0.00943269	0.0130182	0.0789505	0.118967	0.145484	0.00115942	0.232444	0.352897	0.0199092	0.730807	5	18	0.277778
MIPEP	204305_at				0.365979	0.587347	0.708897	0.243633	0.0362108	0.0341513	0.940812	0.357503	0.0463648	0.366897	0.675601	0.613867	0.270003	0.0622776	0.0233994	0.189067	0.467876	0.0105415	5	18	0.277778
RGS19	204336_s_at				0.0343782	0.345658	0.0695639	0.0508429	0.245799	0.0129222	0.344428	0.398248	0.362175	0.000856786	0.839788	0.0509287	0.406864	0.921083	0.820641	0.0104044	0.0174947	0.244485	5	18	0.277778
RASSF1	204346_s_at				0.00396086	0.872827	0.105813	0.886788	0.271778	0.586484	0.13403	0.105378	0.0906842	0.19482	0.331061	0.403427	0.536691	0.023234	0.00742684	0.0265491	0.466917	0.0159179	5	18	0.277778
NAT9	204382_at				0.443128	0.267021	0.0980077	0.988723	0.200992	0.446446	0.03636	0.0316671	0.354869	0.534261	0.613754	0.602788	0.0432756	0.0203113	0.0471182	0.24481	0.603031	0.464348	5	18	0.277778
IFI6	204415_at				0.0101266	0.196613	0.78321	0.927547	0.798926	0.161857	0.00928085	0.0461257	0.0168371	0.112289	0.038574	0.11519	0.987088	0.881999	0.432484	0.765356	0.858476	0.966795	5	18	0.277778
C15orf39	204494_s_at				0.0106486	0.0114108	0.694565	0.565472	0.551408	0.0175494	0.156979	0.0935655	0.00286809	0.304381	0.0260494	0.731202	0.85669	0.822263	0.640288	0.133106	0.847051	0.799213	5	18	0.277778
PLLP	204519_s_at				0.646908	0.103779	0.832876	0.0136868	0.377461	0.604251	0.595662	0.711206	0.0066927	0.0451762	0.365985	0.265014	0.0408265	0.312812	0.82532	0.610186	0.589412	0.019227	5	18	0.277778
TBC1D8	204526_s_at				0.0146523	0.486448	0.0962207	0.197101	0.337378	0.779423	0.65918	0.0132554	0.0681477	0.0063682	0.517168	0.304672	0.562889	0.100463	0.108042	0.583427	0.0266798	0.00207212	5	18	0.277778
SELL	204563_at				0.0488935	0.0944312	0.320107	0.0891145	0.338031	0.101823	0.286325	0.0233066	0.247759	0.0292231	0.338867	0.0277808	0.00783073	0.0967219	0.115858	0.0787513	0.425847	0.415796	5	18	0.277778
ABCG1	204567_s_at				0.572834	0.387684	0.327782	0.463181	0.139717	0.75316	0.583914	0.174617	0.00279287	0.064853	2.27e-05	0.00141045	0.244131	0.0535852	0.477608	0.0428776	0.221381	0.0152109	5	18	0.277778
SHB	204656_at				0.389701	0.899641	0.127938	0.473222	0.142106	0.072597	0.100286	0.0408046	0.0295383	0.00839143	0.310891	0.137189	0.108854	0.0364086	0.185081	0.0808851	0.0388071	0.672161	5	18	0.277778
TRIM23	204732_s_at				0.722318	0.22304	0.0491362	0.666504	0.175855	0.0239524	0.210757	0.454948	0.630406	0.795221	0.781278	0.631371	0.352456	0.0455818	0.279503	0.0275323	0.481526	0.0303942	5	18	0.277778
NAP1L3	204749_at				0.194339	0.217074	0.0274635	0.233546	0.201434	0.0377844	0.382685	0.444352	0.0843052	0.694892	0.0345482	0.999524	0.0781145	0.946458	0.489627	0.0146743	0.121255	0.00611021	5	18	0.277778
FAS	204781_s_at				0.000105768	0.00122497	0.00143922	0.909023	0.141521	0.219228	0.169822	0.824284	0.606695	0.508626	0.290852	0.142373	0.00184046	0.499707	0.30872	0.751872	0.778036	0.0216812	5	18	0.277778
MELK	204825_at				0.578143	0.820392	0.71626	0.0278194	0.0479754	0.0644044	0.812635	0.302139	0.982662	0.561016	0.666991	0.355915	0.616476	0.00317102	0.0980672	0.225154	0.0380053	8.72e-05	5	18	0.277778
TLR2	204924_at				0.002184	0.670676	0.102775	0.79219	0.36445	0.094865	0.655074	0.930086	0.00165614	0.00454025	0.395521	0.259817	0.268874	0.511682	0.512345	0.283155	0.0266131	0.0350125	5	18	0.277778
ZNF274	204937_s_at				0.0487627	0.0407128	0.849754	0.798704	0.934524	0.0975799	0.430289	0.1298	0.000159623	0.00786022	0.019263	0.203394	0.717602	0.203018	0.399821	0.607354	0.962317	0.0786393	5	18	0.277778
ORC5	204957_at				0.00628489	0.220762	0.607369	0.30836	0.257189	0.00387745	0.967519	0.714791	0.056722	0.00408227	0.944283	0.227802	0.207318	0.175879	0.0264287	0.00680679	0.859524	0.158716	5	18	0.277778
MNDA	204959_at				0.350356	0.670822	0.25404	0.157164	0.282514	0.855942	0.494498	0.837285	0.300505	0.0339959	0.491681	0.136559	0.0268164	0.000127351	0.580291	0.144538	0.0271581	0.0136662	5	18	0.277778
HAGH	205012_s_at				0.116854	0.240653	0.245601	0.373625	0.250253	0.381601	0.0101302	0.0126271	0.333848	0.929603	0.0256556	0.131655	0.132042	0.244493	0.00839172	0.0455043	0.66679	0.260484	5	18	0.277778
KIT	205051_s_at				0.607823	0.101822	0.19978	0.0239703	0.0284824	0.769612	0.784047	0.877067	0.409918	0.714631	0.287723	0.474987	0.0296337	0.589478	0.617956	0.932024	0.0225191	0.000828334	5	18	0.277778
AUH	205052_at				0.295017	0.0812655	0.0201823	0.249059	0.668704	0.920831	0.247437	0.199041	0.0340527	0.155274	0.411073	0.782806	0.29025	0.000948304	0.00172128	0.0208843	0.0887864	0.996433	5	18	0.277778
ITGAE	205055_at				0.264088	0.732121	0.0149429	0.0780386	0.213884	0.0264927	0.824969	0.719957	0.0402524	0.48256	0.00341268	0.0717344	0.100072	0.198794	0.334673	0.00558274	0.382582	0.271118	5	18	0.277778
IDUA	205057_s_at				0.00683983	0.716334	0.131532	0.979334	0.0365364	0.581723	0.969229	0.304785	0.00774784	0.0364368	0.063797	0.427708	0.376043	0.373918	0.472714	0.0129802	0.242991	0.319595	5	18	0.277778
ING3	205070_at				0.0100523	0.101202	0.267549	0.368038	0.218928	0.0780846	0.0397298	0.387314	0.539909	0.0208737	0.190032	0.00802126	0.418761	0.33394	0.405675	0.0349491	0.252946	0.453553	5	18	0.277778
PIGF	205078_at				0.189664	0.875926	0.0292793	0.159174	0.0968436	0.0240105	0.770633	0.792739	0.016439	0.0437749	0.408369	0.205899	0.0892146	0.11667	0.184761	0.0387261	0.920806	0.0571612	5	18	0.277778
BCAP29	205084_at				0.869641	0.0351783	0.0162847	0.219933	0.546485	0.317962	0.819684	0.475664	0.106191	0.397363	0.19457	0.482378	0.509419	0.523348	0.755998	0.0138263	0.0204465	0.035543	5	18	0.277778
SLC26A2	205097_at				0.013384	0.887073	0.253795	0.711804	0.00760744	0.011729	0.286392	0.414465	0.473654	0.383673	0.25911	0.626479	0.271923	0.401507	0.245149	0.0042364	0.373852	0.00919823	5	18	0.277778
CCR1	205099_s_at				0.000620312	0.271521	0.678655	0.451284	0.941837	0.247595	0.348962	0.597283	0.239238	0.954697	0.405769	0.925412	0.0220945	0.045281	0.024965	0.00279006	0.0900404	0.251281	5	18	0.277778
CCL3	205114_s_at				0.225769	0.0976792	0.339737	0.000448686	0.903306	0.759724	0.391852	0.0178261	0.778259	0.584988	0.285347	0.140547	0.253431	0.806172	0.0234761	0.0508944	0.0291553	0.00520805	5	18	0.277778
MOK	205130_at				0.65927	0.42677	0.0498166	0.161183	0.519166	0.0226236	0.284791	0.278435	0.0385925	0.370136	0.228055	0.546467	0.24435	0.0347308	0.0112186	0.18432	0.994638	0.963997	5	18	0.277778
APBA3	205146_x_at				0.00244183	0.964621	0.235096	0.591338	0.0148294	0.733175	0.652532	0.827447	0.0179057	0.04163	0.00483805	0.0620259	0.222582	0.277638	0.120483	0.22474	0.474847	0.775113	5	18	0.277778
DDR2	205168_at				0.684162	0.0271854	0.0160452	0.769025	0.369027	0.92542	0.791459	0.846321	0.327311	0.663707	0.0466908	0.502006	0.0023758	0.790771	0.65449	0.0296613	0.619361	0.0771908	5	18	0.277778
PLD1	205203_at				0.0575078	0.724493	0.646395	0.121884	0.850439	0.627112	0.25812	0.471793	0.036467	0.106286	0.858525	0.0585628	0.529761	0.0145048	0.0392408	0.00407861	0.809737	0.0397233	5	18	0.277778
HCAR2	205220_at				0.000174009	0.445374	0.983049	0.775667	0.011145	0.234587	0.655568	0.755971	0.119771	0.0125781	0.357617	0.0222007	0.120349	0.949542	0.871595	0.0352021	0.823634	0.405244	5	18	0.277778
FCN1	205237_at				0.00945974	0.070979	0.100006	0.0578799	0.487361	0.0002743	0.328459	0.716891	0.0411714	0.194278	0.15553	0.243595	0.503408	0.733688	0.354886	0.00797136	0.0324406	0.165672	5	18	0.277778
NR3C2	205259_at				0.598786	0.15464	0.0404703	0.221301	0.730828	0.102946	0.423032	0.48678	0.0091524	0.0483185	0.672596	0.463609	0.232823	0.0349929	0.0419412	0.105299	0.282497	0.092425	5	18	0.277778
LCP2	205269_at				0.0194716	0.211093	0.208157	0.165103	0.878765	0.232503	0.832855	0.51272	0.416244	0.0370316	0.529611	0.0193096	0.0611612	0.600549	0.766409	0.05283	0.0499859	0.00654356	5	18	0.277778
DDC	205311_at				0.976244	0.559711	0.939322	0.442247	0.225593	0.166568	0.764759	0.340271	0.0278581	0.00965009	0.0238102	0.0441597	0.459172	0.0964537	0.217427	0.0186024	0.398421	0.995186	5	18	0.277778
GNA15	205349_at				0.00723479	0.233059	0.359447	0.483157	0.600139	0.82411	0.491441	0.469659	0.0973909	0.330078	0.0303899	0.146182	0.479527	0.722081	0.00951683	0.0121813	0.0106215	0.204058	5	18	0.277778
GGCX	205351_at				0.00735664	0.969169	0.256284	0.744405	0.656138	0.634976	0.670299	0.160428	0.00283419	0.144068	0.0358644	0.5938	0.0821372	0.54557	0.812961	0.0351899	0.211324	0.0269283	5	18	0.277778
DBT	205371_s_at				0.00264665	0.0422058	0.596446	0.159002	0.467027	0.00811216	0.200463	0.300011	0.203167	0.482667	0.832711	0.259419	0.64988	0.00137469	0.0110206	0.737327	0.0604043	0.967965	5	18	0.277778
FES	205418_at				0.150019	0.276949	0.168966	0.326747	0.778752	0.00581067	0.918518	0.513963	0.568122	0.585245	0.589127	0.943244	0.0270959	0.0197298	0.0316151	0.00564624	0.223152	0.385697	5	18	0.277778
GPR183	205419_at				0.323795	0.660566	0.908889	0.0252994	0.965329	0.0421034	0.49802	0.794774	0.192203	0.153532	0.236489	0.545798	0.816295	0.0454942	0.0863407	0.188384	0.0472314	0.00163294	5	18	0.277778
NPY1R	205440_s_at				0.0225455	0.603844	0.0752632	0.739119	0.775416	0.0970347	0.599024	0.218389	0.0379212	0.961099	0.136042	0.498298	0.00502389	0.75982	0.311218	0.415922	0.0423176	0.00311509	5	18	0.277778
PIGB	205452_at				0.0234856	0.450895	0.0317676	0.74076	0.0593411	0.746933	0.0877688	0.143567	0.242311	0.17085	0.55391	0.302658	0.0480355	0.574219	0.308809	0.0403805	0.0232848	0.061561	5	18	0.277778
ARHGEF15	205507_at				0.190497	0.840472	0.130893	0.25699	0.608718	0.180594	0.36813	0.738953	0.778895	0.00122101	0.345892	0.0186925	0.962996	0.0232213	0.0050224	0.0105665	0.188359	0.127407	5	18	0.277778
ZNF415	205514_at				0.0763171	0.0252069	0.469446	0.215957	0.364217	0.322239	0.315492	0.499515	0.00216906	0.193448	0.0732628	0.749609	0.046008	0.136398	0.0701725	0.0471881	0.0203119	0.660021	5	18	0.277778
ROR2	205578_at				0.00772662	0.27541	0.196244	0.192683	0.434587	0.140314	0.4811	0.717186	0.707852	0.373694	0.00897667	0.763434	0.657164	0.339976	0.150938	0.0050026	0.0498366	0.0402083	5	18	0.277778
ANGPT1	205609_at				0.00429184	0.551874	0.221986	0.209831	0.246367	0.0981081	0.209658	0.938879	0.0910701	0.188229	0.597881	0.937648	0.050085	0.521745	0.0445145	0.0302108	0.0326802	0.0030575	5	18	0.277778
ALKBH1	205621_at				0.000456272	0.309122	0.37543	0.957779	0.846917	0.111229	0.645528	0.298113	0.157261	0.343046	0.457471	0.530836	0.77986	0.0444817	0.0210424	0.00459939	0.0266208	0.563219	5	18	0.277778
CNTRL	205642_at				0.0428115	0.977721	0.0222768	0.728824	0.137932	0.00152873	0.815032	0.724069	0.0321435	0.59026	0.0155349	0.498696	0.848226	0.952152	0.494908	0.0904942	0.856676	0.0746555	5	18	0.277778
CTSG	205653_at				0.102503	0.135885	0.030501	0.90519	0.0205484	0.0434227	0.420434	0.495352	0.668144	0.286698	0.780174	0.807365	0.609077	0.7289	0.646817	0.29211	0.00184469	0.0179635	5	18	0.277778
HLA-DOB	205671_s_at				0.00191709	0.868316	0.0626956	0.0357221	0.48092	0.302653	0.871913	0.862902	0.483845	0.376639	0.0308075	0.852539	0.708635	0.857677	0.438989	0.00457101	0.0540138	0.0300623	5	18	0.277778
IL17RA	205707_at				0.770033	0.149136	0.00846719	0.0724053	0.376962	0.0364924	0.0522814	0.665228	0.897295	0.0429582	0.664678	0.279591	0.551506	0.0122239	0.0902415	0.0120618	0.402525	0.345314	5	18	0.277778
DIAPH2	205726_at				0.0431845	0.157148	0.0560412	0.479622	0.0577697	0.347309	0.205236	0.332327	0.147431	0.529465	0.525692	0.926526	0.32167	0.038378	0.0280242	0.00381315	0.234999	0.00512016	5	18	0.277778
RNF126	205748_s_at				2e-05	0.732972	0.163285	0.167701	0.261325	0.0182917	0.00881158	0.354009	0.850112	0.0357307	0.901991	0.102088	0.208341	0.973733	0.223465	0.992161	0.0106548	0.198679	5	18	0.277778
GSR	205770_at				0.00832594	0.820296	0.938913	0.398212	0.606466	0.773473	0.313249	0.581712	0.0041781	0.0489711	0.539903	0.895331	0.0334522	0.938952	0.868597	0.790833	0.0437603	0.221871	5	18	0.277778
WISP2	205792_at				0.326887	0.365255	0.0284869	0.098846	0.563502	0.00552156	0.343194	0.435451	0.343083	0.424636	0.117575	0.113057	0.730731	0.00710776	0.00420253	0.00066381	0.206216	0.1488	5	18	0.277778
KRT1	205900_at				0.0326456	0.585022	0.524472	0.532167	0.201128	0.0154073	0.0189494	0.0275463	0.56414	0.101499	0.920574	0.364838	0.90558	0.2325	0.463902	0.00605727	0.279264	0.401598	5	18	0.277778
ZNF443	205928_at				0.00709099	0.864515	0.0631134	0.689716	0.347365	0.0841961	0.430929	0.604849	0.0285808	0.0235362	0.802822	0.719683	0.219968	0.59161	0.167165	0.0398689	0.0146563	0.430576	5	18	0.277778
GTF2E1	205930_at				0.00020026	0.266657	0.378468	0.348932	0.074608	0.00626945	0.600932	0.543431	0.538825	0.532576	0.697449	0.799571	0.0226461	0.818762	0.871182	0.0197176	0.0495719	0.051444	5	18	0.277778
ZNF426	205964_at				0.0171406	0.472234	0.0208342	0.10239	0.37191	0.0572031	0.276735	0.70611	0.0140869	0.855791	0.113854	0.742796	0.691061	0.00416178	0.0218407	0.193828	0.367645	0.839079	5	18	0.277778
ADAM28	205997_at				0.00722851	0.179635	0.193106	0.276823	0.457281	0.355512	0.0891353	0.194687	0.0827219	0.0141145	0.531211	0.0697273	0.41418	0.0397	0.0172098	0.0533516	0.029264	0.920501	5	18	0.277778
CASP1	206011_at				0.530504	0.369692	0.180142	0.57585	0.0971926	0.0500326	0.188375	0.00935398	0.0896841	0.00324866	0.242065	0.0415339	0.470092	0.946377	0.55923	0.00187546	0.00691764	0.0776123	5	18	0.277778
SLC24A1	206081_at				0.0606161	0.92177	0.373128	0.276982	0.378489	0.814477	0.0176795	0.038838	0.890337	0.620698	0.0369111	0.329769	0.0748955	0.39913	0.678972	0.0398326	0.481276	0.0322939	5	18	0.277778
BX511012.1	206095_s_at				0.0265527	0.00339616	0.0281336	0.841691	0.281535	0.130044	0.547371	0.461308	0.584581	0.548923	0.597474	0.850192	0.0366054	0.516235	0.733498	0.000194961	0.491565	0.478713	5	18	0.277778
EPHA4	206114_at				0.0119322	0.0717363	0.37584	0.37666	0.445198	0.097508	0.00582895	0.865181	0.00592161	0.424464	0.0198791	0.760527	0.710863	0.950324	0.877248	0.0105826	0.423574	0.32623	5	18	0.277778
ZNF623	206188_at				0.0318798	0.956472	0.0161262	0.241671	0.632754	0.00904034	0.131204	0.746309	0.735647	0.550952	0.0866085	0.231426	0.0441923	0.0159686	0.0928937	0.856832	0.910146	0.0809362	5	18	0.277778
CD180	206206_at				4.34e-05	0.320633	0.908489	0.211073	0.429235	0.214907	0.955171	0.193807	0.493655	0.380144	0.749094	0.796031	0.942927	0.0484539	0.0248778	0.0216754	0.0153271	0.290511	5	18	0.277778
PAX2	206229_x_at				0.460526	0.82654	0.206146	0.0125417	0.656987	0.0109343	0.887107	0.328722	0.528531	0.979658	0.772167	0.391091	0.539693	0.0293696	0.00739623	0.00118077	0.567178	0.774396	5	18	0.277778
IFI16	206332_s_at				0.416588	0.465372	0.315162	0.19309	0.921485	0.65885	0.0924578	0.983285	0.602508	0.0233042	0.28037	0.0158706	0.0073235	0.779286	0.321254	0.522432	0.0194557	0.0411164	5	18	0.277778
ZIC1	206373_at				0.000432971	0.583235	0.339121	0.815999	0.536447	0.319985	0.00677299	0.838732	0.0418901	0.035939	0.212434	0.188196	0.606931	0.207395	0.0688887	0.00035085	0.759718	0.766719	5	18	0.277778
CFP	206380_s_at				0.0390563	0.906953	0.148249	0.408885	0.0344484	0.00601009	0.0735497	0.0828124	0.088136	0.0191783	0.52208	0.100273	0.586396	0.656898	0.486538	0.0197411	0.0849059	0.424356	5	18	0.277778
IGSF6	206420_at				0.349154	0.998812	0.895579	0.51834	0.165223	0.308638	0.122011	0.296772	0.0268257	0.129709	0.590842	0.491301	0.0262552	0.0554482	0.0254603	0.570538	0.0334103	0.00104994	5	18	0.277778
AC005895.4	206430_at				0.0232149	0.307707	0.468605	0.673703	0.47564	0.00169119	0.582063	0.995169	0.349312	0.787446	0.0391748	0.455087	0.527549	0.0294734	0.10387	0.058041	0.575869	0.0330225	5	18	0.277778
S1PR4	206437_at				0.466274	0.100067	0.063147	0.0317271	0.185291	0.00778526	0.00344702	0.188198	0.127699	0.550856	0.0494206	0.363774	0.65409	0.871384	0.406087	0.0384662	0.982899	0.825533	5	18	0.277778
NAPA	206491_s_at				0.0386935	0.602587	0.0267547	0.79879	0.314211	0.053944	0.036627	0.0119991	0.825728	0.919767	0.170669	0.499023	0.878603	0.271511	0.150107	0.0204023	0.552047	0.117999	5	18	0.277778
CD28	206545_at				0.329104	0.280476	0.841425	0.429563	0.888166	0.0449477	0.380739	0.395423	0.112614	0.00238271	0.166496	0.0114326	0.289257	0.188853	0.0797985	0.145334	0.0122178	7.99e-05	5	18	0.277778
ZNF43	206695_x_at				0.452466	0.679254	0.0519904	0.9883	0.747057	0.0121927	0.0302788	0.189368	0.0255977	0.817442	0.218742	0.591278	0.252945	0.0325189	0.105686	0.0629665	0.157875	0.0498213	5	18	0.277778
EPB41L3	206710_s_at				0.369545	0.0130049	0.103612	0.905562	0.716331	0.844871	0.567336	0.0354155	0.645453	0.52088	0.855572	0.349342	0.120703	0.276351	0.84962	0.00744569	0.0366294	0.000109206	5	18	0.277778
LPAR2	206723_s_at				0.0141426	0.362964	0.0220508	0.575477	0.193297	0.102616	0.18066	0.655077	0.0337069	0.0220329	0.210436	0.0843762	0.439061	0.105413	0.899309	0.0489304	0.122138	0.201581	5	18	0.277778
GRIA3	206730_at				0.537088	0.85777	0.067887	0.0216293	0.669714	0.0776326	0.0323855	0.0145915	0.015619	0.527632	0.214158	0.227557	0.403082	0.0800013	0.0720162	0.465865	0.0421011	0.166081	5	18	0.277778
TULP2	206733_at				0.186792	0.44678	0.254172	0.944576	0.0260044	0.00721865	0.130149	0.796678	0.433588	0.0124752	0.762635	0.0480696	0.538784	0.205437	0.124164	0.0379094	0.0872004	0.232509	5	18	0.277778
ASGR1	206743_s_at				0.177023	0.630638	0.0972063	0.255715	0.175705	0.00199375	0.895611	0.181427	0.0491059	0.468826	0.165142	0.971756	0.0385817	0.0396304	0.316235	0.00665146	0.742385	0.499156	5	18	0.277778
HBD	206834_at				0.0378509	0.609251	0.0109245	0.0455335	0.107548	0.000644305	0.879463	0.101222	0.401014	0.0886784	0.237963	0.0554968	0.526527	0.039212	0.166876	0.0941318	0.251298	0.396297	5	18	0.277778
CLDN11	206908_s_at				0.305797	0.0420653	0.0492533	0.611945	0.00487092	0.68596	0.133476	0.829529	0.940979	0.762155	0.448862	0.257415	0.678698	0.0100892	0.146231	0.00729929	0.444331	0.389012	5	18	0.277778
VCY	206922_at				0.020161	0.651836	0.207587	0.564382	0.109491	0.806025	0.790314	0.886499	0.230731	0.890734	0.180071	0.756318	0.035942	0.0211065	0.0276273	0.00392626	0.943116	0.0628896	5	18	0.277778
GLYAT	206930_at				0.0594159	0.678577	0.0281917	0.617362	0.0397969	0.391338	0.0413357	0.0499396	0.0921165	0.443673	0.102488	0.810415	0.0383188	0.978418	0.402633	0.114723	0.735297	0.561255	5	18	0.277778
ASS1	207076_s_at				0.0633786	0.567905	0.861387	0.794103	0.382051	0.312027	0.0220297	0.0113477	0.854517	0.712245	0.00760309	0.0081682	0.794018	0.618349	0.732296	0.0137418	0.791285	0.914726	5	18	0.277778
GAGE1	207086_x_at				0.473341	0.945519	0.113906	0.645091	0.883765	0.0701465	0.323843	0.42607	0.035196	0.226295	0.0349191	0.188797	0.616635	0.877307	0.884573	0.0328241	0.0465201	0.0345482	5	18	0.277778
LEP	207092_at				0.164379	0.127637	0.557703	0.127059	0.285453	0.410291	0.217803	0.129641	0.0102015	0.479991	0.0206231	0.425118	0.381134	0.884076	0.507968	0.00471586	0.0485158	0.0280056	5	18	0.277778
TPSAB1	207134_x_at				0.179764	0.0970293	0.0356916	0.120401	0.0215403	0.445458	0.375867	0.165447	0.284263	0.869003	0.0341284	0.217285	0.656413	0.184181	0.184771	0.014168	0.193335	0.0386791	5	18	0.277778
PTPRC	207238_s_at				0.00021771	0.286395	0.860747	0.452397	0.471516	0.525597	0.00683536	0.011578	0.476779	0.148298	0.8681	0.387805	0.568591	0.407869	0.315938	0.00489398	0.0647069	0.00282314	5	18	0.277778
TP63	207382_at				0.0771179	0.862703	0.363977	0.0428149	0.866875	0.002599	0.194319	0.909608	0.025908	0.0318795	0.171978	0.0899767	0.617796	0.0533027	0.0578981	0.0210556	0.717248	0.697454	5	18	0.277778
RPL36AL	207585_s_at				0.0145981	0.574561	0.0858737	0.38619	0.632629	0.282745	0.146664	0.19794	0.0100989	0.365646	0.0145836	0.598411	0.0343943	0.562136	0.49322	0.00843218	0.982581	0.662216	5	18	0.277778
ZFHX2	207699_at				0.727817	0.176326	0.129484	0.533605	0.332105	0.0365764	0.160391	0.534675	0.0496314	0.94581	0.0158497	0.478082	0.779461	0.200629	0.100688	0.0188828	0.0421999	0.178095	5	18	0.277778
SEC13	207707_s_at				0.247445	0.892099	0.639322	0.0760044	0.882282	0.00109308	0.964591	0.290661	0.0354075	0.0292826	0.0465657	0.09355	0.920638	0.223119	0.242578	0.00333287	0.14232	0.141332	5	18	0.277778
PKP2	207717_s_at				0.346321	0.328499	0.172598	0.330592	0.952391	0.932087	0.00779333	0.16692	0.0386437	0.0363163	0.0710188	0.0934254	0.00426024	0.711698	0.760452	0.0146945	0.0639188	0.488977	5	18	0.277778
CALCR	207887_s_at				0.029172	0.72622	0.873156	0.18984	0.0606908	0.92249	0.106512	0.207539	0.743033	0.640419	0.0849936	0.151055	0.512576	0.0459033	0.00320694	0.00457274	0.427848	0.0410171	5	18	0.277778
MMP25	207890_s_at				0.0136714	0.358941	0.160334	0.0213842	0.609711	0.0492586	0.67369	0.304046	0.549162	0.18448	0.297264	0.654226	0.0293666	0.266678	0.847719	0.0315901	0.774387	0.637863	5	18	0.277778
PROZ	208034_s_at				0.00510247	0.354495	0.816243	0.0223252	0.703537	0.123013	0.215181	0.908376	0.0192582	0.10137	0.270488	0.150017	0.123347	0.00390183	0.101351	0.00635467	0.562318	0.521985	5	18	0.277778
REV3L	208070_s_at				0.287749	0.244761	0.164838	0.383159	0.297903	0.00566718	0.883831	0.459077	0.0167602	0.353463	0.827735	0.448743	0.00239416	0.241884	0.498419	0.00888936	0.64045	0.0105897	5	18	0.277778
VOPP1	208091_s_at				0.0405633	0.87194	0.430467	0.146085	0.962667	0.0944609	0.262031	0.853494	0.0120607	0.790954	0.0255061	0.51327	0.110853	0.33917	0.36571	0.401375	0.00204263	0.00925951	5	18	0.277778
DDX21	208152_s_at				0.413887	0.519294	0.225833	0.877361	0.716783	0.044634	0.00557302	0.0235974	0.457941	0.0916336	0.377281	0.555575	0.0387704	0.196786	0.709667	0.00532999	0.392298	0.162397	5	18	0.277778
TNFAIP8	208296_x_at				0.0778406	0.102874	0.87168	0.431913	0.508788	0.00240795	0.199788	0.30517	0.160719	0.0922024	0.0383	0.032961	0.0064416	0.819888	0.628722	0.881932	0.958046	0.0113063	5	18	0.277778
S1PR2	208537_at				0.920801	0.340746	0.813204	0.0867707	0.0270528	0.155566	0.0311242	0.0389969	0.6521	0.57231	0.801268	0.638041	0.0412971	0.0566604	0.276284	0.00608059	0.870156	0.388684	5	18	0.277778
PDIA6	208638_at				0.231906	0.0389371	0.0979669	0.400364	0.0538725	0.0173631	0.143857	0.51194	0.187089	0.190578	0.224957	0.383076	0.018171	0.310637	0.422749	0.00135965	0.270468	0.0328942	5	18	0.277778
XRCC5	208643_s_at				0.0336708	0.599853	0.285883	0.675717	0.393793	0.233309	0.809171	0.0252153	0.0943063	0.0382602	0.562333	0.269194	0.133906	0.345076	0.508113	0.00210876	0.96203	0.0392773	5	18	0.277778
SRSF3	208673_s_at				0.0154408	0.0424601	0.107498	0.571948	0.918756	0.176156	0.0392348	0.365453	0.818352	0.534128	0.880992	0.691542	0.474008	0.642133	0.380306	0.00663344	0.0264978	0.450643	5	18	0.277778
GARS	208693_s_at				0.846639	0.885845	0.953663	0.0740422	0.711651	0.425806	0.891159	0.76227	0.0409797	0.957653	0.0172121	0.678424	0.0243417	0.360617	0.843875	0.332617	0.0117449	0.0227526	5	18	0.277778
TKT	208699_x_at				0.00100855	0.567871	0.402521	0.0749868	0.0306486	0.00425337	0.0861722	0.360102	0.30665	0.208748	0.230554	0.0229609	0.660197	0.518897	0.601439	0.0179404	0.655434	0.116051	5	18	0.277778
ARPC3	208736_at				0.00629179	0.769399	0.0964409	0.119227	0.110897	0.102452	0.800186	0.213784	0.357012	0.410172	0.0269632	0.612258	0.0283351	0.838174	0.422726	0.0342252	0.0584306	0.0126687	5	18	0.277778
YWHAB	208743_s_at				0.0355526	0.600224	0.0525568	0.494151	0.173392	0.127844	0.148772	0.34603	0.0684669	0.748127	0.0190822	0.829441	0.0198151	0.972811	0.600448	0.0423781	0.302088	0.0146663	5	18	0.277778
MRPL3	208787_at				0.942196	0.0475214	0.915212	0.84354	0.208111	0.0193564	0.92417	0.196337	0.770627	0.911134	0.795714	0.481949	0.00668026	0.110872	0.280901	0.000249246	0.352008	0.0433225	5	18	0.277778
SRP72	208802_at				0.551052	0.626917	0.38617	0.513895	0.321269	0.0146158	0.610795	0.68447	0.717199	0.75327	0.82661	0.641607	0.018846	0.0444965	0.0291883	0.000165554	0.842661	0.239954	5	18	0.277778
C6orf62	208809_s_at				0.180795	0.966902	0.79221	0.162832	0.179466	0.0570841	0.628995	0.376017	0.0420058	0.158713	0.0169796	0.044214	0.0113894	0.569382	0.964475	0.137874	0.145664	0.0401663	5	18	0.277778
TXN	208864_s_at				0.0214978	0.556678	0.0188287	0.112538	0.992509	0.606643	0.630705	0.358478	0.0561701	0.390304	0.00812117	0.160281	0.00108838	0.798112	0.836583	0.0727213	0.00390347	0.206925	5	18	0.277778
REEP5	208873_s_at				0.535872	0.244107	0.00585315	0.72361	0.0727266	0.0172912	0.776034	0.308815	0.0532853	0.292753	0.0456802	0.259347	0.105557	0.392738	0.388937	0.00904052	0.0702393	0.0113884	5	18	0.277778
PAK2	208877_at				0.0154468	0.0870475	0.708894	0.603338	0.39248	0.95777	0.374017	0.763963	0.449808	0.810441	0.0344063	0.220289	0.0118722	0.179267	0.541032	0.044219	0.18947	0.0105299	5	18	0.277778
GGA2	208915_s_at				0.0997389	0.499066	0.464349	0.990225	0.215127	0.0723217	0.221546	0.32994	0.000411792	0.00831084	0.00634837	0.0356891	0.510403	0.543652	0.180039	0.171489	0.375453	0.00481411	5	18	0.277778
TGFBR2	208944_at				0.0346567	0.204177	0.177941	0.612904	0.194961	0.893936	0.950022	0.277898	0.27719	0.193153	0.422986	0.369603	0.0283209	0.167959	0.461251	0.000812737	0.0480083	0.0124457	5	18	0.277778
KLF6	208961_s_at				0.0104451	0.584228	0.671398	0.216915	0.892162	0.00734665	0.32121	0.624928	0.0211439	0.117552	0.139362	0.146311	0.438788	0.00666396	0.0212582	0.287484	0.735038	0.994724	5	18	0.277778
IFI16	208966_x_at				0.00693354	0.65999	0.487429	0.0484249	0.853709	0.620208	0.390996	0.913939	0.966832	0.116343	0.555983	0.034426	0.00601689	0.936033	0.852452	0.660601	0.00942397	0.0636476	5	18	0.277778
ATP5G1	208972_s_at				0.774127	0.976607	0.0304636	0.192685	0.590867	0.342094	0.653705	0.889117	0.995041	0.675433	0.0612401	0.0340304	0.0110061	0.265966	0.0328459	0.0402345	0.528073	0.570439	5	18	0.277778
UBC	208980_s_at				0.00483553	0.223785	0.669256	0.775774	0.546607	0.000103021	0.0194551	0.00790357	0.938624	0.726223	0.296548	0.663287	0.596662	0.181827	0.712127	0.0860973	0.898576	0.000294089	5	18	0.277778
POLR2C	208996_s_at				0.215892	0.719378	0.0380043	0.493425	0.753143	0.0380412	0.0129177	0.0497178	0.254019	0.768565	0.138594	0.642404	0.507755	0.208666	0.179234	0.00601623	0.599881	0.307028	5	18	0.277778
UQCRB	209066_x_at				0.000700532	0.745159	0.144567	0.540955	0.245164	0.0244778	0.751148	0.773497	0.25449	0.380611	0.0377859	0.104595	0.0184793	0.30177	0.516151	0.154614	0.0221438	0.400027	5	18	0.277778
SH3GLB1	209090_s_at				0.0183217	0.103946	0.00205353	0.306292	0.840248	0.166809	0.383877	0.389082	0.161733	0.0146202	0.507029	0.204757	0.114308	0.923058	0.64938	0.00989065	0.84756	0.00016269	5	18	0.277778
PPAP2A	209147_s_at				0.892154	0.820223	0.9043	0.151809	0.741551	0.198696	0.329037	0.0956275	0.0349577	0.260967	0.0244919	0.368669	0.703763	0.821676	0.890562	0.0291446	0.00636451	0.0261896	5	18	0.277778
TCF3	209151_x_at				0.00235821	0.21098	0.895275	0.1446	0.163148	0.310243	0.155613	0.390634	0.0109928	0.0838487	0.863723	0.450362	0.18605	0.0193492	0.00711879	0.00280582	0.210014	0.277501	5	18	0.277778
RP11-48B14.2	209154_at				0.846416	0.281331	0.582293	0.228571	0.735768	0.0168147	0.67548	0.964229	0.618465	0.845404	0.455775	0.312042	0.00566523	0.0204128	0.0793952	0.421771	0.00421057	0.0320476	5	18	0.277778
CYB561	209163_at				0.857316	0.0581797	0.0904878	0.237747	0.0483826	0.362501	0.345769	0.327791	0.0480908	0.01631	0.280646	0.154706	0.952422	0.622067	0.201183	0.0285758	0.161529	0.0247333	5	18	0.277778
RABGGTB	209181_s_at				0.0301057	0.235806	0.290842	0.198238	0.164891	0.126422	0.167512	0.819415	0.271212	0.385334	0.029477	0.0427268	0.0169043	0.0561818	0.218371	0.00177488	0.464425	0.943491	5	18	0.277778
DR1	209188_x_at				0.033911	0.256213	0.664038	0.0954624	0.214571	0.629296	0.144815	0.0735206	0.13664	0.0265393	0.320567	0.128108	0.0318726	0.579433	0.938721	0.0214443	0.0371167	0.315563	5	18	0.277778
CETN2	209194_at				0.362547	0.0567308	0.0308867	0.0995494	0.985547	0.713534	0.32573	0.925759	0.885865	0.545657	0.983129	0.537696	0.00296765	0.418537	0.0503744	0.0197891	0.0257666	0.0250075	5	18	0.277778
CLCN7	209235_at				0.0740637	0.149278	0.331498	0.225513	0.347978	0.0121698	0.353123	0.219487	0.0449622	0.714797	0.00606581	0.283871	0.0311369	0.611961	0.551438	0.000175647	0.861516	0.376498	5	18	0.277778
PEG3	209242_at				0.0139649	0.343191	0.163788	0.884776	0.873359	0.431873	0.108922	0.151148	0.0378352	0.155679	0.0253678	0.0842426	0.36337	0.408751	0.0387831	0.00948665	0.449836	0.434521	5	18	0.277778
GHITM	209248_at				0.00768113	0.00656184	0.208191	0.115147	0.301057	0.627336	0.599176	0.259567	0.662719	0.624107	0.110381	0.13403	0.0918477	0.0155621	0.0383789	0.0111506	0.839614	0.593763	5	18	0.277778
KLHDC10	209256_s_at				0.000508806	0.412518	0.00262732	0.629405	0.895769	0.484271	0.847043	0.787466	0.0125091	0.130686	0.0415169	0.121933	0.11178	0.787171	0.730836	0.156262	0.622909	0.00720753	5	18	0.277778
FAM208A	209284_s_at				0.749057	0.055927	0.563389	0.520187	0.176711	0.0775476	0.944254	0.978501	0.00363128	0.342068	0.0295667	0.946374	0.00536971	0.260444	0.43075	0.00336476	0.0180716	0.129211	5	18	0.277778
RUNX1	209360_s_at				0.275647	0.425745	0.0163076	0.186903	0.505209	0.414409	0.76483	0.93996	0.97614	0.620938	0.205925	0.0586349	0.525766	0.0133695	0.0177177	0.380235	0.0159648	0.0128126	5	18	0.277778
MED21	209362_at				0.0592601	0.144775	0.0351524	0.199751	0.293283	0.0216867	0.988999	0.235491	0.317717	0.0277854	0.421254	0.145243	0.0285375	0.268285	0.198348	0.00384788	0.0745924	0.114869	5	18	0.277778
DEAF1	209407_s_at				0.0113923	0.749134	0.224367	0.375966	0.357059	0.0285504	0.124722	0.215846	0.00689844	0.0834931	0.0697308	0.260561	0.481137	0.0272408	0.0430302	0.323357	0.237293	0.529323	5	18	0.277778
CCBL2	209472_at				0.789114	0.152709	0.0308289	0.0616875	0.8304	0.0142351	0.178677	0.922839	0.161089	0.841089	0.109032	0.824118	0.0305823	0.187986	0.00613007	0.00728747	0.488066	0.136276	5	18	0.277778
ENTPD1	209473_at				0.0658627	0.209669	0.346887	0.796241	0.440502	0.834423	0.393535	0.913815	0.877725	0.0303225	0.677127	0.169461	0.158815	0.000490198	0.0758323	0.0031981	0.018474	0.00570807	5	18	0.277778
TMX1	209476_at				0.114258	0.151498	0.0644251	0.879308	0.0344972	0.00390036	0.256163	0.818835	0.780413	0.748133	0.402895	0.708144	0.00533382	0.27797	0.174812	0.000495604	0.0238792	0.110157	5	18	0.277778
CCDC28A	209479_at				0.105099	0.315198	0.045222	0.871608	0.129911	0.631843	0.125041	0.286709	0.251459	0.0488042	0.538018	0.906068	0.607941	0.0138381	0.0314954	0.0553633	0.407766	0.0093191	5	18	0.277778
PATZ1	209494_s_at				0.246973	0.372186	0.550477	0.194056	0.0648069	0.644867	0.806317	0.197206	0.00544988	0.0158152	0.00486942	0.00710989	0.374997	0.291567	0.331891	0.0264253	0.55027	0.550638	5	18	0.277778
PLAA	209532_at				0.031367	0.16474	0.959895	0.431571	0.165472	0.0137718	0.257142	0.886737	0.744928	0.109428	0.470875	0.334977	0.151998	0.00560635	0.0230603	0.288415	0.499375	6.81e-05	5	18	0.277778
CD74	209619_at				0.0138355	0.0849663	0.436827	0.015806	0.106404	0.0384825	0.176325	0.48785	0.330564	0.169084	0.945602	0.626153	0.915335	0.0599072	0.165639	0.0100967	0.0322341	0.0914039	5	18	0.277778
OSBPL3	209627_s_at				0.0487349	0.817373	0.188136	0.53991	0.148408	0.0666547	0.469417	0.712252	0.157437	0.210677	0.437404	0.472307	0.449576	0.0436013	0.692106	0.0390976	0.00326975	0.00563686	5	18	0.277778
SOCS5	209647_s_at				0.00757536	0.0330979	0.231644	0.258726	0.254778	0.0132141	0.988938	0.506311	0.281145	0.576569	0.513854	0.238015	0.680005	0.601391	0.764464	0.0105076	0.320938	0.00997491	5	18	0.277778
KIAA0947	209654_at				0.0234042	0.176381	0.0213599	0.36368	0.409108	0.00481894	0.662763	0.54943	0.00353955	0.219893	0.529919	0.767911	0.0844386	0.553797	0.533724	0.0261705	0.839283	0.212353	5	18	0.277778
CHUK	209666_s_at				0.346274	0.0088552	0.452797	0.626691	0.501622	0.173216	0.697123	0.418608	0.46088	0.909202	0.779296	0.307834	0.015725	0.0346368	0.0294737	0.00140302	0.444557	0.0972598	5	18	0.277778
RP11-721G13.1	209669_s_at				0.0483172	0.77207	0.155062	0.5556	0.578754	0.845601	0.0245283	0.193672	0.0342679	0.691251	0.0205701	0.564057	0.0139755	0.237309	0.590907	0.566246	0.575748	0.097375	5	18	0.277778
TRAC	209670_at				0.696234	0.342009	0.361236	0.764582	0.151993	0.0374498	0.106526	0.69928	0.0406886	0.0670902	0.483206	0.317406	0.0185527	0.00768694	0.298759	0.055782	0.0514738	0.0406442	5	18	0.277778
CRY1	209674_at				0.214283	0.082285	0.60399	0.457808	0.56836	0.0141779	0.716946	0.789133	0.0902533	0.48368	0.176008	0.677175	0.000145987	0.776642	0.923964	0.00102594	0.0249217	0.0293618	5	18	0.277778
ABCG2	209735_at				0.00195816	0.0457876	0.0400719	0.893081	0.268658	0.21319	0.430292	0.554965	0.765569	0.613949	0.617122	0.254147	0.915021	0.149401	0.221168	0.14178	0.0164155	0.0147238	5	18	0.277778
TRIP11	209778_at				1.05e-06	0.028704	0.0784152	0.56041	0.554777	0.115804	0.827041	0.873117	0.103831	0.0277104	0.817154	0.853085	0.0221607	0.220329	0.102071	0.87716	0.493144	0.010094	5	18	0.277778
PHTF2	209780_at				0.0491283	0.471867	0.0930536	0.588609	0.262056	0.541828	0.685172	0.806835	0.112907	0.938049	0.0316714	0.448988	0.048211	0.88577	0.976244	0.0136097	0.16733	0.0150307	5	18	0.277778
DBP	209782_s_at				0.0357819	0.0587863	0.716487	0.316275	0.643908	0.459366	0.970743	0.245263	0.0130057	0.00962366	0.172896	0.0430101	0.306518	0.00301931	0.0930037	0.56829	0.650458	0.940324	5	18	0.277778
FAM65B	209829_at				0.849158	0.039433	0.0463902	0.544128	0.290857	0.439866	0.268831	0.930689	0.432556	0.907705	0.713541	0.223577	0.0243094	0.0068842	0.00695679	0.238223	0.277885	0.0596456	5	18	0.277778
DNASE2	209831_x_at				0.00968491	0.948672	0.0768284	0.565451	0.535956	0.0332576	0.226166	0.0254658	0.135529	0.211648	0.306508	0.770251	0.603962	0.76289	0.0535868	0.000881115	0.0255849	0.216452	5	18	0.277778
SLC4A7	209884_s_at				0.195368	0.233996	0.328359	0.713849	0.311955	0.0292491	0.779984	0.571145	0.745709	0.986416	0.704693	0.895237	0.0739568	0.0453935	0.0391437	0.0102245	0.0237971	0.415404	5	18	0.277778
CD300A	209933_s_at				0.520881	0.590615	0.0249615	0.19898	0.415876	0.407607	0.18315	0.329297	0.492818	0.172885	0.983791	0.534463	0.855515	0.12578	0.015517	0.00226758	0.00155515	0.0118357	5	18	0.277778
NCF2	209949_at				0.765126	0.562294	0.615263	0.345744	0.183385	0.316371	0.119735	0.0967316	0.0652157	0.143369	0.238839	0.211669	0.0283555	0.0036671	7.63e-05	0.993949	0.00224564	0.000732764	5	18	0.277778
AIMP2	209971_x_at				0.0813476	0.401208	0.134556	0.335548	0.205489	0.0219605	0.737896	0.276244	0.0345618	0.013058	0.0861195	0.0529418	0.345269	0.463504	0.451459	0.0921434	0.0197076	0.0403224	5	18	0.277778
ORC3	210028_s_at				0.0359455	0.724094	0.02963	0.636142	0.312596	0.00016116	0.0439445	0.987792	0.812674	0.128548	0.479144	0.925971	0.153507	0.330481	0.162245	0.00332976	0.923028	0.223845	5	18	0.277778
MAGOH	210093_s_at				0.00553014	0.404921	0.945507	0.0489058	0.211952	0.513604	0.0226934	0.398421	0.744321	0.110943	0.152534	0.328848	0.00467846	0.134068	0.499184	0.0485527	0.72547	0.382592	5	18	0.277778
CAMP	210244_at				0.0638883	0.186692	0.0016817	0.0613271	0.09412	0.242518	0.19279	0.504188	0.0197192	0.0222358	0.818065	0.51532	0.271259	0.0611796	0.00697668	0.039911	0.750444	0.105596	5	18	0.277778
POU5F1	210265_x_at				0.60911	0.41171	0.0276054	0.830781	0.389201	0.898569	0.34662	0.557301	0.644922	0.276195	0.710226	0.853234	0.221499	0.00974888	0.00137384	0.00587191	0.0423209	0.928236	5	18	0.277778
IFNG	210354_at				0.0325664	0.279902	0.0391329	0.0510578	0.0489973	0.198824	0.748007	0.702219	0.301598	0.665011	0.890579	0.630718	0.852121	0.00371501	0.341982	0.0401638	0.919164	0.248592	5	18	0.277778
MYL4	210395_x_at				0.822792	0.0388191	0.0345675	0.238609	0.546546	0.669166	0.602487	0.681703	0.314854	0.226712	0.0444822	0.063178	0.74867	0.0142984	0.0230157	0.288129	0.839028	0.826015	5	18	0.277778
GRIN2B	210411_s_at				0.776565	0.83224	0.522708	0.753325	0.469585	0.753482	0.120599	0.0120878	0.510884	0.966104	0.948789	0.937937	0.00897536	0.034383	0.394663	0.00100473	0.898001	0.0198288	5	18	0.277778
GOLGA8A	210425_x_at				0.368992	0.205385	0.570523	0.151219	0.38776	0.0192269	0.698391	0.00731137	0.32736	0.243156	0.0818837	0.0544621	0.00598337	0.599975	0.971495	0.00537912	0.986231	0.0365737	5	18	0.277778
HLA-G	210514_x_at				0.0482352	0.203542	0.107237	0.396317	0.668474	0.0457542	0.0852113	0.0205486	0.0443094	0.25294	0.56917	0.549871	0.429334	0.0330557	0.113832	0.264626	0.88378	0.354596	5	18	0.277778
CDH8	210518_at				0.0450042	0.956763	0.0319129	0.0339727	0.0555392	0.0781323	0.164523	0.517999	0.392854	0.728062	0.632344	0.76345	0.57396	0.46179	0.585351	0.000190416	0.0152034	0.125778	5	18	0.277778
CMAHP	210571_s_at				0.00381799	0.957031	0.0907151	0.0334987	0.93953	0.229962	0.542823	0.783886	0.205614	0.976248	0.0155242	0.407779	0.135514	0.897967	0.676378	0.00127462	0.198316	0.0374747	5	18	0.277778
GBA	210589_s_at				0.735203	0.75061	0.22619	0.780448	0.250709	0.126173	0.948792	0.255364	0.0140563	0.494302	0.0254205	0.666334	0.455137	0.0223866	0.00783238	0.39914	0.218204	0.0178592	5	18	0.277778
TP53I3	210609_s_at				0.90518	0.0949022	0.689102	0.441434	0.976908	0.0485827	0.0479259	0.533936	0.346084	0.580287	0.555731	0.503721	0.326213	0.0458442	0.144889	0.679222	0.0163661	0.0341113	5	18	0.277778
GGA2	210658_s_at				0.965848	0.429991	0.208974	0.585749	0.0784727	0.432496	0.337909	0.483264	0.00532472	4.12e-05	0.0957763	0.00692573	0.50778	0.0439229	0.0495897	0.107376	0.781502	0.223913	5	18	0.277778
CMKLR1	210659_at				0.00442281	0.943941	0.576772	0.407015	0.102326	0.487373	0.939319	0.146726	0.374468	0.0794059	0.609359	0.285462	0.0230004	0.14204	0.0368074	0.00065008	0.000610706	0.114668	5	18	0.277778
AC004878.3	210707_x_at				0.000224112	0.488975	0.03105	0.54843	0.373432	0.0397088	0.682574	0.604597	0.0123017	0.157381	0.00534173	0.0892544	0.475147	0.718499	0.584034	0.128846	0.703635	0.38257	5	18	0.277778
CSE1L	210766_s_at				0.00100001	0.453015	0.120569	0.276729	0.312578	0.0185936	0.903142	0.502948	0.234711	0.309648	0.0240703	0.0295749	0.323689	0.645045	0.272017	0.037147	0.825879	0.33636	5	18	0.277778
C1orf38	210785_s_at				0.175192	0.00588542	0.771822	0.477884	0.528059	0.0210244	0.377422	0.123815	0.596056	0.101646	0.754029	0.648113	0.189004	0.0304637	0.214505	0.0147102	0.0164636	0.111616	5	18	0.277778
FCGR2B	210889_s_at				0.000970458	0.276296	0.951272	0.954607	0.172609	0.398577	0.835679	0.783425	0.752808	0.902283	0.94301	0.742363	0.0246878	0.0941357	0.13131	0.0388492	0.0027111	0.00217109	5	18	0.277778
CD86	210895_s_at				0.970758	0.619506	0.704131	0.824018	0.426887	0.922414	0.148348	0.119754	0.209301	0.969035	0.181758	0.90317	0.0480739	0.00835292	0.0392134	0.00999102	0.0668803	0.0366784	5	18	0.277778
ST3GAL6	210942_s_at				0.0472068	0.476828	0.137833	0.349688	0.101022	0.836569	0.24574	0.179566	0.0360364	0.149298	0.973496	0.93469	0.0360633	0.000451352	0.0493255	0.0693526	0.160278	0.407599	5	18	0.277778
PPAP2A	210946_at				0.0627487	0.164924	0.327607	0.225184	0.537725	0.879051	0.911955	0.415847	0.0202923	0.0417679	0.013858	0.0734701	0.302386	0.630008	0.492006	0.0233617	0.00329913	0.0842085	5	18	0.277778
RAB27A	210951_x_at				0.921764	0.111384	0.772175	0.580693	0.660648	0.326871	0.120081	0.159513	0.0611308	0.0451591	0.0021554	0.00106287	0.0117396	0.430798	0.936235	0.91295	0.0460663	0.457509	5	18	0.277778
COBLL1	211032_at				0.125274	0.0390727	0.0412523	0.179712	0.141365	0.570538	0.432295	0.368861	0.0140925	0.0103297	0.241713	0.732125	0.950356	0.256213	0.213413	0.555414	0.493914	0.0116811	5	18	0.277778
PDIA4	211048_s_at				0.0074282	0.188188	0.0764923	0.781089	0.797559	0.115804	0.0131874	0.0211049	0.0274121	0.0877267	0.0666014	0.320813	0.206718	0.574847	0.561405	0.10324	0.036999	0.118449	5	18	0.277778
TNFRSF10C	211163_s_at				0.0158472	0.161035	0.144875	0.108394	0.153743	0.0210389	0.122982	0.988179	0.0671447	0.00636257	0.247104	0.00634997	0.399118	0.694528	0.896109	0.00762855	0.473514	0.749432	5	18	0.277778
ADAM7	211238_at				0.0215946	0.71539	0.474719	0.940081	0.32966	0.732906	0.561207	0.446613	0.0288929	0.660923	0.0108967	0.324001	0.207625	0.436265	0.110233	0.0209725	0.708645	0.027135	5	18	0.277778
HFE	211331_x_at				0.00686234	0.709809	0.209245	0.220397	0.422161	0.294108	0.397044	0.56934	0.263705	0.150484	0.306934	0.333393	0.691184	0.0497918	0.0474412	0.0333052	0.504826	0.0338821	5	18	0.277778
TUBGCP4	211337_s_at				0.00490865	0.666398	0.0189449	0.180115	0.0334476	0.0311724	0.325478	0.0547826	0.0261264	0.0623896	0.205033	0.279939	0.934	0.18701	0.362466	0.323748	0.879826	0.924931	5	18	0.277778
WDR37	211383_s_at				0.00398124	0.731234	0.926152	0.668414	0.105098	0.172358	0.75607	0.346173	0.365499	0.901472	0.9371	0.355923	0.559511	0.0241093	0.00434088	0.0144195	0.0622055	0.026605	5	18	0.277778
FCGR2B	211395_x_at				0.164743	0.40839	0.0239991	0.926492	0.204049	0.23265	0.443139	0.227818	0.394606	0.595935	0.445861	0.912098	0.21055	0.0277685	0.112582	0.00907265	0.011024	0.021047	5	18	0.277778
SC5DL	211423_s_at				0.401876	0.0110386	0.0733864	0.124631	0.166413	0.246038	0.591514	0.279928	0.646905	0.784148	0.532436	0.942544	0.000632646	0.0188579	0.0498837	0.00455979	0.28291	0.577652	5	18	0.277778
LRRFIP1	211452_x_at				0.620556	0.914194	0.904786	0.929805	0.178245	0.657636	0.469805	0.940488	0.000631331	0.0420025	0.000350661	0.0118042	0.967721	0.843788	0.91967	0.000217256	0.414877	0.386149	5	18	0.277778
TBXA2R	211590_x_at				0.989375	0.443421	0.0398024	0.0148736	0.831128	0.0718026	0.217937	0.266248	0.217151	0.363703	0.640531	0.344384	0.759271	0.0140299	0.00216513	0.126569	0.4692	0.00842316	5	18	0.277778
FTH1P5	211628_x_at				0.160656	0.268984	0.122665	0.605861	0.284356	0.000190032	0.933432	0.897425	0.0933048	0.657435	0.00882866	0.609543	0.156628	0.0121613	0.328782	0.279204	0.03891	0.0467752	5	18	0.277778
IGHV1-69	211634_x_at				0.601478	0.979524	0.0467494	0.408352	0.725889	0.758195	0.577227	0.710093	0.494442	0.51849	0.21775	0.860417	0.582353	0.00773917	0.00152721	0.0126295	0.152775	0.0411556	5	18	0.277778
DYNC1I2	211684_s_at				0.0371283	0.313148	0.0177793	0.411804	0.16119	0.00461775	0.769127	0.180679	0.212536	0.205907	0.99287	0.956235	0.0319472	0.809026	0.820279	0.0224399	0.282926	0.225583	5	18	0.277778
HBA1	211745_x_at				0.117394	0.133093	0.0363346	0.124723	0.455717	0.0179506	0.454868	0.0615011	0.191542	0.218312	0.0292242	0.0381674	0.214364	0.00580542	0.0721475	0.0953653	0.330793	0.392001	5	18	0.277778
ATP5F1	211755_s_at				0.95866	0.092821	0.0814417	0.919902	0.0559745	0.124012	0.353016	0.160756	0.66012	0.937999	0.235146	0.142811	0.0219461	0.0132686	0.0400838	0.0337127	0.300323	0.0445976	5	18	0.277778
EPB41L3	211776_s_at				0.612702	0.00739183	0.949511	0.995916	0.53556	0.730625	0.630782	0.0139415	0.965083	0.484504	0.43503	0.320599	0.374162	0.0491623	0.189208	0.0585778	0.00912307	2.67e-06	5	18	0.277778
KCNAB2	211791_s_at				0.275584	0.779171	0.323291	0.976944	0.289664	0.583174	0.969955	0.769473	0.0246718	0.0391006	0.00711773	0.00633391	0.443098	0.825621	0.910622	0.00710971	0.495324	0.515063	5	18	0.277778
FYB	211795_s_at				0.611133	0.254676	0.584385	0.293435	0.398134	0.335662	0.148284	0.454989	0.0303194	0.0291795	0.353207	0.294175	0.0128888	0.273462	0.0652937	0.490833	0.00720877	0.0126966	5	18	0.277778
HNRNPA3	211932_at				0.0309486	0.0532311	0.0386086	0.231611	0.179246	0.0314482	0.877515	0.361745	0.420368	0.137497	0.126929	0.0261665	0.0366846	0.702715	0.552344	0.122074	0.522163	0.192617	5	18	0.277778
RBPJ	211974_x_at				8.34e-06	0.242034	0.032837	0.787058	0.91716	0.12632	0.00374325	0.0100867	0.709742	0.346171	0.702838	0.375849	0.264929	0.751048	0.25553	0.979392	0.00421386	0.184727	5	18	0.277778
PPIA	211978_x_at				0.603732	0.780306	0.0119796	0.262434	0.370717	0.0496649	0.332524	0.396525	0.851181	0.66896	0.766476	0.84488	0.314092	0.00413975	0.00719958	0.0134757	0.723761	0.979644	5	18	0.277778
AC139149.2	211995_x_at				0.784069	0.549398	0.435116	0.520803	0.204819	0.00903796	0.607481	0.894543	0.908597	0.846729	0.186483	0.577669	0.757939	0.0156734	0.0988934	0.0276582	0.0341404	0.0356828	5	18	0.277778
CTB-13H5.1	212042_x_at				0.000184366	0.346018	0.978316	0.200814	0.849413	0.179649	0.159112	0.596407	0.118958	0.419986	0.00982131	0.11794	0.00026269	0.891524	0.44694	0.00650858	0.0313858	0.439498	5	18	0.277778
MGAT5	212098_at				0.000136444	0.60502	0.971669	0.836565	0.416423	0.476906	0.666858	0.891535	0.0495413	0.110387	0.162474	0.371085	0.00719676	0.462031	0.923962	0.699389	0.000491075	0.011407	5	18	0.277778
HN1L	212109_at				0.00679654	0.804847	0.0364375	0.600893	0.594906	0.877748	0.568423	0.00982404	0.417818	0.0674327	0.0108045	0.0308023	0.578537	0.749996	0.470746	0.437292	0.232997	0.802165	5	18	0.277778
RHOQ	212122_at				0.0745983	0.107643	0.120567	0.358058	0.426112	0.0105158	0.759413	0.316725	0.412181	0.310558	0.130454	0.120866	0.0270807	0.0618664	0.0403437	0.0346802	0.614138	0.00445046	5	18	0.277778
NIPA2	212129_at				0.00821752	0.0651664	0.422848	0.0605804	0.784761	0.038719	0.740474	0.257667	0.633659	0.760597	0.882038	0.406131	0.0161805	0.768415	0.467666	0.0100376	0.00374086	0.0613754	5	18	0.277778
TMEM183A	212164_at				0.0289668	0.271271	0.460049	0.0958545	0.0203126	0.950283	0.745448	0.499474	0.264038	0.874079	0.0443507	0.181449	0.814932	0.784192	0.903664	0.258343	0.0395843	0.0259381	5	18	0.277778
PREPL	212216_at				6.14e-05	0.903346	0.0647848	0.732279	0.533261	0.0291735	0.913815	0.429081	0.0202276	0.331524	0.927577	0.047005	0.314141	0.381355	0.533371	0.507622	0.173613	0.00818935	5	18	0.277778
PSME4	212219_at				0.0870095	0.378786	0.114685	0.186514	0.409601	0.126549	0.46673	0.476102	0.705362	0.24594	0.0359122	0.22236	0.598148	0.0120378	0.0139665	0.185091	0.000521482	0.00537824	5	18	0.277778
MAP1B	212233_at				0.181739	0.205038	0.0829817	0.632863	0.0267007	0.936841	0.556253	0.448029	0.0564609	0.547878	0.0288199	0.348855	0.093552	0.366741	0.709982	0.0208802	0.024009	0.00163748	5	18	0.277778
MTDH	212248_at				0.155513	0.191857	0.00817329	0.305167	0.0526002	0.532822	0.532476	0.401361	0.261109	0.916433	0.265621	0.967822	0.000804098	0.911821	0.80203	0.00395648	0.0278786	0.00192171	5	18	0.277778
C2orf82	212260_at				0.00816591	0.569522	0.52383	0.84332	0.0819451	0.0775799	0.567951	0.373706	0.327007	0.0168886	0.765272	0.0665803	0.313946	0.109293	0.344955	0.0287564	0.0409266	0.0147209	5	18	0.277778
ANKRD12	212286_at				0.000122477	0.0142923	0.485524	0.613342	0.456081	0.0180636	0.850418	0.194173	0.642022	0.761892	0.297883	0.705511	0.0160184	0.212027	0.437009	0.105419	0.573653	0.0021958	5	18	0.277778
SUZ12	212287_at				0.520276	0.515034	0.0483394	0.892553	0.508349	0.0197282	0.225061	0.894916	0.0404103	0.397329	0.55808	0.689727	0.0782038	0.1249	0.0465734	0.00936407	0.216864	0.12353	5	18	0.277778
ANKRD12	212289_at				0.031512	0.786023	0.0957599	0.481188	0.241908	0.0139317	0.368963	0.592093	0.0631948	0.56842	0.643036	0.717709	0.010391	0.363796	0.241222	0.0265699	0.905222	0.00184988	5	18	0.277778
EP400	212376_s_at				0.035481	0.459974	0.643488	0.890622	0.042494	0.00992251	0.932385	0.851253	0.766936	0.217314	0.1976	0.706458	0.829132	0.020606	0.135189	0.0109274	0.359631	0.642222	5	18	0.277778
TRIM33	212436_at				0.00923473	0.00614103	0.0811134	0.749946	0.650583	0.347982	0.621234	0.0362235	0.316612	0.89196	0.702869	0.336996	0.314509	0.104958	0.139261	0.00697983	0.609089	0.0169605	5	18	0.277778
LYPLA1	212449_s_at				0.129783	0.141774	0.264905	0.964883	0.0737798	0.479778	0.283541	0.682909	0.347344	0.228348	0.517844	0.0196275	0.0269059	0.130657	0.029688	0.00584427	0.447961	0.0478753	5	18	0.277778
SUCLG2	212459_x_at				0.543591	0.021285	0.064715	0.0754852	0.126533	0.00390432	0.207816	0.213362	0.432469	0.90951	0.964527	0.442285	0.0167461	0.0970491	0.0452327	0.00112888	0.438107	0.393301	5	18	0.277778
AC098614.2	212481_s_at				5.89e-05	0.184231	0.0859759	0.508732	0.903218	0.681447	0.0656978	0.838314	0.152124	0.199043	0.185113	0.247206	0.261678	0.011441	0.00357466	0.704317	0.00130438	0.0070421	5	18	0.277778
STK38L	212565_at				0.00250789	0.200823	0.391114	0.624154	0.380242	0.0885717	0.478119	0.0475069	0.338955	0.691962	0.0106771	0.227603	0.0811544	0.368409	0.789404	0.948285	0.0360177	0.00823601	5	18	0.277778
HMGXB4	212597_s_at				0.356616	0.388659	0.218966	0.888574	0.157808	0.0101779	0.379366	0.13095	0.0166563	0.0326939	0.219318	0.134656	0.0231092	0.0641014	0.375654	0.0200029	0.149643	0.06838	5	18	0.277778
PTPN11	212610_at				0.577863	0.0589905	0.0305759	0.555902	0.0931763	0.025196	0.214677	0.109688	0.473646	0.328246	0.243724	0.210994	0.00139272	0.411717	0.391153	0.0067505	0.291665	0.000971443	5	18	0.277778
TMEM194A	212621_at				0.00734484	0.179991	0.0113296	0.371889	0.17406	0.00346946	0.52856	0.0380214	0.595649	0.345435	0.244168	0.160706	0.304184	0.424335	0.137267	0.315685	0.86295	0.0481753	5	18	0.277778
UFL1	212634_at				0.83964	0.0844022	0.197264	0.554306	0.0215795	0.00222659	0.873095	0.45468	0.187453	0.677989	0.204241	0.858839	0.0687703	0.0202032	0.256724	0.000909547	0.505738	0.0226586	5	18	0.277778
MAPK1IP1L	212644_s_at				0.000649679	0.763978	0.165737	0.0371564	0.915913	0.0753671	0.0947894	0.566481	0.933	0.940577	0.316325	0.470144	0.452441	0.0378868	0.124671	0.0247743	0.239749	0.0337272	5	18	0.277778
EPB41L3	212681_at				0.195407	0.0118211	0.0670722	0.740046	0.724908	0.445272	0.974471	0.0304982	0.691386	0.358813	0.889952	0.109324	0.015073	0.303744	0.768002	0.0415408	0.123386	0.00427274	5	18	0.277778
KDM3A	212689_s_at				0.75933	0.925923	0.0242188	0.446196	0.780933	0.0285244	0.369629	0.118791	0.0249358	0.018198	0.845198	0.442337	0.625744	0.0552536	0.182464	0.0528207	0.626319	0.0128052	5	18	0.277778
TLN2	212701_at				0.109452	0.135445	0.320128	0.761264	0.443003	0.0928156	0.507046	0.703816	0.0136741	0.0200597	0.0274272	0.0291837	0.604101	0.917422	0.943602	0.374949	0.672565	0.0266729	5	18	0.277778
RND3	212724_at				0.746347	0.249939	0.950687	0.746063	0.50383	0.0426845	0.690044	0.720951	0.00850646	0.0289249	0.0264043	0.54117	0.0189767	0.250747	0.0524445	0.340469	0.365245	0.569956	5	18	0.277778
ANKRD46	212731_at				0.0297524	0.0499997	0.0528788	0.311337	0.0339096	0.00763904	0.60783	0.495495	0.358639	0.643079	0.524675	0.839512	0.0616772	0.714058	0.993654	0.000356499	0.0625339	0.877694	5	18	0.277778
CAMSAP2	212765_at				0.876304	0.28426	0.135203	0.0502623	0.958002	0.00758444	0.763585	0.881936	0.0560585	0.288059	0.000438485	0.0332125	0.025447	0.841834	0.851874	0.0175031	0.539123	0.127345	5	18	0.277778
TLE3	212770_at				0.143488	0.863453	0.147547	0.511058	0.741821	0.0214145	0.690635	0.658918	0.0474269	0.724648	0.00978928	0.449801	0.729456	0.154095	0.163258	0.59667	0.0480633	0.0187678	5	18	0.277778
FTL	212788_x_at				0.754008	0.418098	0.094888	0.0502198	0.570702	0.000135221	0.69316	0.350869	0.540165	0.635508	0.0409822	0.357089	0.969737	0.788932	0.237146	0.0381362	0.00518471	0.005736	5	18	0.277778
ASCC3	212815_at				0.0622038	0.0884378	0.0126567	0.544872	0.0781539	0.0447243	0.653367	0.248733	0.175884	0.471268	0.742309	0.838468	0.0129406	0.0816706	0.0604741	0.011989	0.860745	0.00527166	5	18	0.277778
DNAJB5	212817_at				0.00645812	0.751935	0.605341	0.284692	0.424868	0.707959	0.527438	0.0320259	0.814915	0.902711	0.786437	0.914808	0.226745	0.00734403	0.0104884	0.018474	0.665112	0.378875	5	18	0.277778
PAQR4	212858_at				0.0382524	0.363878	0.984581	0.68233	0.290756	0.00606565	0.0280743	0.0713711	0.0276876	0.404303	0.0347292	0.423669	0.12065	0.143053	0.571509	0.0582248	0.99022	0.701836	5	18	0.277778
HMHA1	212873_at				0.747806	0.21458	0.0781673	0.389956	0.99172	0.0803193	0.59333	0.14029	0.0739406	0.0156892	0.804076	0.129418	0.546725	0.273224	0.0268911	0.024702	0.016572	0.0353424	5	18	0.277778
ATP2B1	212930_at				0.651025	0.480689	0.136293	0.153916	0.773914	0.0445986	0.204052	0.698296	0.124383	0.0459699	0.31143	0.158367	0.0310878	0.321066	0.489821	0.435958	0.0481089	0.0363836	5	18	0.277778
SLC5A3	212944_at				0.166128	0.749727	0.0169795	0.130735	0.347057	0.00193057	0.513247	0.468879	0.0268135	0.125178	0.00332378	0.00968436	0.134657	0.518308	0.72463	0.165155	0.602354	0.562028	5	18	0.277778
PAM	212958_x_at				0.182532	0.381428	0.145711	0.996401	0.169652	0.0475012	0.116878	0.00548615	0.0182964	0.0796989	0.503901	0.441807	0.0666782	0.0948808	0.583163	0.00155515	0.111492	3.97e-05	5	18	0.277778
SGMS1	212989_at				0.0197354	0.210273	0.209849	0.627739	0.286341	0.0218194	0.768919	0.376962	0.24118	0.674796	0.663024	0.7965	0.0478207	0.24552	0.149089	0.00517085	0.162075	0.00610831	5	18	0.277778
BBX	213016_at				0.605782	0.327109	0.0338805	0.513968	0.0154659	0.000159886	0.926916	0.936525	0.53168	0.798328	0.226978	0.674453	0.136035	0.0452898	0.188001	0.0868557	0.997699	0.0168384	5	18	0.277778
TROVE2	213027_at				0.548282	0.0274591	0.121375	0.902937	0.328372	0.0387013	0.377356	0.973636	0.441184	0.259445	0.08099	0.467906	0.0157859	0.309256	0.158741	0.0159274	0.29395	0.0493294	5	18	0.277778
AIF1	213095_x_at				0.851798	0.130562	0.050302	0.451207	0.832593	0.167253	0.0244286	0.0381252	0.204713	0.128346	0.996126	0.264936	0.294085	0.172501	0.646156	0.0408392	0.00037493	0.0169047	5	18	0.277778
ACTR3	213102_at				0.531154	0.00632737	0.112266	0.613263	0.118022	0.150783	0.631485	0.537771	0.236762	0.938734	0.381323	0.0196919	0.000942005	0.0952002	0.0674592	0.0406938	0.0957413	0.0447424	5	18	0.277778
TSR3	213104_at				0.000967744	0.335301	0.0401118	0.381895	0.257203	0.00188312	0.869019	0.941026	0.029056	0.627023	0.0316737	0.669065	0.121228	0.260316	0.486073	0.0850864	0.624482	0.216128	5	18	0.277778
UHRF1BP1L	213118_at				0.665152	0.0564234	0.657576	0.743955	0.283827	0.724711	0.446832	0.693301	0.0081483	0.13927	0.0287616	0.159629	0.0052058	0.927577	0.320553	0.0146001	0.346882	0.00743446	5	18	0.277778
DLAT	213149_at				0.688036	0.0327956	0.247932	0.54211	0.440066	0.0299957	0.619142	0.249229	0.976728	0.111765	0.996451	0.0766684	0.00310503	0.0889031	0.0047585	0.03319	0.661973	0.502066	5	18	0.277778
CEP350	213165_at				0.000367186	0.284409	0.0169819	0.312468	0.333347	0.00177233	0.846253	0.148549	0.461705	0.0780451	0.629559	0.701205	0.0434934	0.732254	0.604147	0.0112585	0.259773	0.470914	5	18	0.277778
DZIP3	213186_at				0.0705646	0.195244	0.00552646	0.466153	0.45826	0.0601444	0.205316	0.922168	0.0485894	0.465009	0.724953	0.360159	0.289064	0.013002	0.0142358	0.0442644	0.473903	0.0955244	5	18	0.277778
PPM1B	213225_at				0.147597	0.353412	0.428154	0.929736	0.177378	0.489157	0.777141	0.264665	0.710176	0.843277	0.0462541	0.0447204	0.00899982	0.16049	0.375978	0.0121412	0.163883	0.0132303	5	18	0.277778
PIBF1	213239_at				0.633712	0.0451702	0.141547	0.590951	0.773818	0.0427026	0.189661	0.305868	0.0351561	0.0322514	0.710575	0.283677	0.129126	0.153662	0.396146	0.0143726	0.48415	0.261619	5	18	0.277778
DOPEY1	213271_s_at				0.00784601	0.372534	0.0459516	0.277736	0.36106	0.038179	0.928672	0.499114	0.240979	0.0500493	0.120326	0.0129074	0.271046	0.586997	0.583386	0.0506056	0.88468	0.0423087	5	18	0.277778
ODZ4	213273_at				0.646947	0.846072	0.0228425	0.180939	0.0818563	0.246578	0.64361	0.387557	0.0483952	0.546931	0.020466	0.763412	0.960187	0.133103	0.140295	0.596174	0.0188112	0.00452437	5	18	0.277778
TMEM30B	213285_at				0.829213	0.639545	0.00532602	0.577328	0.562295	0.363094	0.447068	0.564147	0.278198	0.0214547	0.267381	0.0156387	0.0357954	0.609151	0.498259	0.00563986	0.157598	0.139418	5	18	0.277778
CYLD	213295_at				0.696455	0.180224	0.0100595	0.606126	0.272375	0.00555514	0.41974	0.326414	0.0268597	0.130751	0.754065	0.916522	0.977877	0.368808	0.637067	0.0480744	0.501988	0.0177923	5	18	0.277778
SNED1	213488_at				0.0292062	0.407179	0.237613	0.333591	0.224699	0.855399	0.136891	0.0451053	0.565435	0.0361385	0.458239	0.0316233	0.94206	0.443567	0.574796	0.162494	0.295017	0.0252554	5	18	0.277778
MAPRE2	213489_at				6.98e-05	0.730539	0.0255155	0.986029	0.47494	0.0161072	0.447992	0.322277	0.342717	0.469666	0.568492	0.750017	0.82593	0.828103	0.588841	0.034575	0.0471833	0.596396	5	18	0.277778
HBG1	213515_x_at				0.321727	0.113075	0.0151566	0.00726329	0.482987	0.00106539	0.96021	0.3235	0.899815	0.677735	0.29018	0.0847614	0.213055	0.024077	0.440533	0.0196667	0.536847	0.652962	5	18	0.277778
LAMA2	213519_s_at				0.0201558	0.484124	0.497015	0.295199	0.774267	0.0322903	0.229222	0.0398262	0.191756	0.0901656	0.102905	0.170504	0.0275263	0.290552	0.899259	0.682108	0.263843	0.0353404	5	18	0.277778
ZNF710	213542_at				0.242843	0.281842	0.353331	0.237295	0.338972	0.448517	0.0677782	0.608767	0.262056	0.677088	0.00198588	0.0121632	0.315987	0.110021	0.0236808	0.00667554	0.480993	0.015806	5	18	0.277778
SNX3	213545_x_at				0.0392092	0.272532	0.152294	0.201765	0.419698	0.762755	0.929817	0.0712017	0.342818	0.572881	0.715097	0.958264	0.0389202	0.0467523	0.0346915	0.00327655	0.314755	0.172343	5	18	0.277778
FAM69A	213689_x_at				0.00524814	0.0271559	0.0237552	0.329998	0.593538	0.00114793	0.733453	0.92237	0.635037	0.396994	0.55022	0.433365	0.187156	0.831507	0.500372	0.149865	0.0716735	0.0085518	5	18	0.277778
RSBN1	213694_at				4.65e-05	0.0401298	0.0254325	0.375652	0.712561	0.0122511	0.265816	0.860829	0.729431	0.607196	0.483313	0.780456	0.0773074	0.271024	0.702775	0.010332	0.887651	0.128797	5	18	0.277778
C12orf29	213701_at				0.0101708	0.493166	0.0830204	0.0806465	0.456554	0.00321881	0.435157	0.794989	0.392879	0.301094	0.489808	0.914086	0.033866	0.0166178	0.142199	0.00457522	0.657108	0.862555	5	18	0.277778
RABGGTB	213704_at				0.672103	0.146015	0.87632	0.213527	0.408236	0.00280051	0.432073	0.826138	0.903821	0.603221	0.10188	0.0770191	0.00882626	0.0235802	0.029052	0.00212305	0.276625	0.66532	5	18	0.277778
COX5B	213735_s_at				0.000740429	0.66846	0.138135	0.00837726	0.663695	0.34569	0.140773	0.952858	0.246086	0.26168	0.0264153	0.0424525	0.0197282	0.0637602	0.0548422	0.114608	0.922098	0.31597	5	18	0.277778
NOL7	213838_at				0.0449089	0.021803	0.517812	0.139982	0.177091	0.0186509	0.318021	0.402023	0.402684	0.261296	0.901084	0.89365	0.073983	0.0803893	0.183435	0.00101975	0.0199808	0.0955479	5	18	0.277778
NIPBL	213918_s_at				0.0268828	0.0135475	0.717381	0.580461	0.911489	0.627455	0.660603	0.454799	0.773728	0.661194	0.3698	0.317325	0.000386805	0.495562	0.270757	0.322666	0.0394188	0.0273086	5	18	0.277778
CCL8	214038_at				0.000251155	0.165868	0.0678647	0.00168135	0.115385	0.065926	0.147603	0.605485	0.604895	0.428923	0.00130302	0.860748	0.532717	0.936306	0.666797	0.0444085	0.134163	0.0189855	5	18	0.277778
WDR67	214061_at				0.476575	0.851106	0.39332	0.194774	0.301651	0.0477046	0.155681	0.11047	0.0368746	0.722279	0.730481	0.273181	0.399764	0.496716	0.0145956	0.114152	0.0231694	0.000303208	5	18	0.277778
PDLIM7	214121_x_at				0.010991	0.909361	0.0741714	0.724079	0.881977	0.0012175	0.485121	0.741898	0.0449926	0.115119	0.193376	0.446997	0.248841	0.00572487	0.00741402	0.131562	0.131433	0.225054	5	18	0.277778
CCPG1	214151_s_at				0.00152962	0.218544	0.109778	0.213618	0.760655	0.113486	0.714493	0.491776	0.158315	0.0174369	0.268269	0.682963	0.0555654	0.881973	0.849649	0.00281566	0.0050287	0.000496075	5	18	0.277778
CCPG1	214152_at				0.018458	0.161305	0.0806144	0.262301	0.446821	0.174487	0.954803	0.216092	0.26653	0.0197579	0.110585	0.816364	0.0111958	0.701054	0.693838	0.0115137	0.499013	0.0293131	5	18	0.277778
DKK3	214247_s_at				0.648215	0.425251	0.651992	0.968195	0.250552	0.724686	0.800633	0.124844	0.019799	0.00588477	0.0137462	0.0237815	0.0196006	0.515386	0.0964102	0.217664	0.124523	0.150826	5	18	0.277778
ATP10A	214255_at				0.0647111	0.936704	0.0703513	0.332719	0.324943	0.476165	0.23664	0.541551	0.121052	0.974067	0.0346516	0.519353	0.673339	0.0428096	0.0314805	0.00199889	0.253518	0.00827902	5	18	0.277778
2013-09-06	214298_x_at				0.246956	0.894799	0.604019	0.278664	0.523695	0.134561	0.927033	0.326145	0.0010321	0.30696	0.00315658	0.20693	0.0432486	0.79488	0.847006	0.00227348	0.90069	0.0135136	5	18	0.277778
C1orf105	214357_at				0.0251678	0.419817	0.22218	0.392017	0.687021	0.576142	0.798204	0.840115	0.00800947	0.123869	0.0158464	0.139457	0.901461	0.591476	0.913293	0.0175989	0.274067	0.0389882	5	18	0.277778
CDC42BPA	214464_at				0.302595	0.720169	0.0695034	0.96229	0.091283	0.59175	0.00753741	0.556904	0.0182808	0.263804	0.0104058	0.214681	0.0204917	0.516881	0.998323	0.526905	0.123207	0.00937457	5	18	0.277778
GNAS	214548_x_at				0.00281983	0.488862	0.282443	0.497513	0.121302	0.049233	0.000189272	0.00061566	0.363438	0.996316	0.751724	0.67638	0.876372	0.371819	0.932177	0.00197466	0.690546	0.175104	5	18	0.277778
ACACB	214584_x_at				0.862522	0.129788	0.0142296	0.0150642	0.314596	0.281669	0.00741978	0.103802	0.270218	0.484663	0.741776	0.827435	0.281771	0.66193	0.145621	0.0194933	0.00858462	0.981681	5	18	0.277778
CFLAR	214618_at				0.653124	0.954047	0.0559244	0.171447	0.0445287	0.00630973	0.73971	0.322582	0.0210725	0.239704	0.0888698	0.602836	0.510368	0.940845	0.513695	0.0170524	0.0950643	0.0469862	5	18	0.277778
ANKRD36	214723_x_at				0.00633268	0.665587	0.0303405	0.999086	0.0877204	0.953276	0.0980851	0.853712	0.207491	0.593534	0.101547	0.29223	0.037009	0.220627	0.0288797	0.838626	0.833675	0.0331505	5	18	0.277778
IPCEF1	214735_at				0.0948356	0.2769	0.445094	0.390686	0.445084	0.071763	0.0391047	0.720584	0.607813	0.0270251	0.565988	0.0344965	0.00480152	0.631463	0.494526	0.0447445	0.0822038	0.375089	5	18	0.277778
MSR1	214770_at				0.0184194	0.651156	0.506449	0.901266	0.207034	0.103961	0.352861	0.302003	0.000631825	0.411402	0.0426427	0.506311	0.170649	0.284207	0.712749	0.0737406	0.013878	0.00022588	5	18	0.277778
TIPRL	214773_x_at				0.363385	0.676081	0.0186091	0.683322	0.0845663	0.00179265	0.364583	0.953921	0.0393511	0.594053	0.0308652	0.411987	0.00839962	0.186526	0.166142	0.854738	0.598369	0.251816	5	18	0.277778
SUCLG2	214835_s_at				0.0482392	0.119547	0.303325	0.196258	0.225205	0.00506155	0.0633351	0.842733	0.396866	0.926965	0.988322	0.186932	0.0069772	0.123052	0.0210372	0.00134246	0.399354	0.424919	5	18	0.277778
ALPK3	214846_s_at				0.326078	0.212072	0.109799	0.565426	0.609422	0.63529	0.210088	0.180181	0.0625919	0.5249	0.0201185	0.631954	0.586656	0.0391432	0.00971357	0.120584	0.013113	0.00348574	5	18	0.277778
N4BP2L1	214906_x_at				0.0162183	0.806919	0.464232	0.796816	0.401335	0.336171	0.723441	0.347206	0.00910634	0.362527	0.0392063	0.820295	0.176612	0.759159	0.770636	0.0205083	0.399942	0.0459867	5	18	0.277778
TMC6	214958_s_at				0.0220436	0.0175339	0.0297539	0.110311	0.234455	0.832764	0.686882	0.128563	0.302336	0.48329	0.362122	0.918126	0.702337	0.371646	0.0223744	0.0345106	0.356979	0.27745	5	18	0.277778
EXT1	214985_at				0.376542	0.614298	0.1594	0.95708	0.216534	0.426758	0.569116	0.716849	0.0230688	0.368135	0.139798	0.272862	0.346487	0.0247781	0.0118748	0.0139309	0.796472	0.00886282	5	18	0.277778
FNBP1L	215017_s_at				0.0187775	0.82226	0.896885	0.354502	0.244621	0.194465	0.645223	0.795568	0.0026891	0.87382	0.977425	0.165427	0.00242598	0.0561127	0.0194503	0.0216239	0.701088	0.335161	5	18	0.277778
PEX1	215023_s_at				0.0792487	0.0944787	0.0390333	0.187695	0.27042	0.228808	0.0432914	0.0034245	0.20421	0.104264	0.920296	0.833014	0.945247	0.000274181	0.0064161	0.939925	0.542691	0.139684	5	18	0.277778
GRSF1	215030_at				0.534624	0.250694	0.0296514	0.360777	0.0544324	0.0168513	0.206676	0.979259	0.0375804	0.527736	0.797254	0.593804	0.0257412	0.806179	0.187106	0.00048911	0.885501	0.16298	5	18	0.277778
VPS16	215216_at				0.651703	0.765608	0.145741	0.87621	0.70308	0.339493	0.256884	0.0725568	0.0127757	0.00376798	0.0341201	0.0176137	0.84787	0.83957	0.602435	0.0109258	0.503303	0.0631445	5	18	0.277778
RPL23	215224_at				0.0615377	0.716475	0.930896	0.0246162	0.836411	0.79029	0.141562	0.811825	0.0371719	0.0347813	0.0202953	0.0192447	0.265622	0.580263	0.95363	0.26179	0.487645	0.263454	5	18	0.277778
POLDIP3	215357_s_at				0.11376	0.745965	0.143336	0.449094	0.0426707	0.154029	0.0409842	0.592089	0.00706995	0.00733679	0.383951	0.98005	0.635512	0.394092	0.142576	0.0209846	0.409599	0.738503	5	18	0.277778
DDAH2	215537_x_at				0.0966087	0.353221	0.591572	0.0724433	0.508456	0.0103757	0.928226	0.73879	0.0119021	0.085412	0.00168864	0.0282818	0.195279	0.216687	0.131056	0.518992	0.315561	0.0377086	5	18	0.277778
LTN1	215596_s_at				0.00459517	0.29295	0.0278067	0.723071	0.0563666	0.0135083	0.246287	0.456541	0.977301	0.620621	0.927009	0.495791	0.0378828	0.208947	0.231268	0.00132316	0.251204	0.135497	5	18	0.277778
AC004878.3	215667_x_at				0.0551365	0.965089	0.012012	0.745136	0.442942	0.00308421	0.83656	0.43453	0.0181651	0.237026	0.0118298	0.127117	0.802209	0.102256	0.0138236	0.133165	0.971022	0.213946	5	18	0.277778
SUCLG2	215772_x_at				0.447345	0.0147082	0.0532963	0.290238	0.175199	0.0443539	0.134049	0.293284	0.389848	0.726642	0.841313	0.532266	0.00932087	0.0969129	0.0365071	0.00211199	0.515599	0.432386	5	18	0.277778
CTNNA1	215883_at				0.0314058	0.980512	0.95833	0.451528	0.503663	0.113532	0.946846	0.0807223	0.390578	0.0430763	0.599338	0.117606	0.0399723	0.0389136	0.041523	0.115941	0.835758	0.126583	5	18	0.277778
SNAPC4	215926_x_at				0.00533836	0.366719	0.136318	0.404082	0.356523	0.334443	0.0505993	0.809571	0.150119	0.312201	0.185263	0.0671012	0.0893946	0.00761141	0.0351574	0.00668592	0.924311	0.0471064	5	18	0.277778
ZMYM5	215948_x_at				0.211605	0.0153056	0.724992	0.871643	0.829212	0.0160658	0.462157	0.176957	0.0369923	0.21955	0.040015	0.242291	0.0112942	0.208663	0.221088	0.816322	0.210005	0.441187	5	18	0.277778
CACTIN	215954_s_at				0.125221	0.27216	0.878097	0.928135	0.0153618	0.0110604	0.0527989	0.472094	0.00721137	0.0752581	0.00347697	0.0977657	0.380361	0.926049	0.94963	0.00360147	0.101519	0.0802918	5	18	0.277778
ZXDA	216014_s_at				0.870021	0.913642	0.0480542	0.636171	0.17001	0.461777	0.494952	0.814994	0.0146044	0.0841246	0.00621638	0.0812451	0.11799	0.81887	0.523387	0.0148902	0.460672	0.0185044	5	18	0.277778
TBCB	216194_s_at				0.00924257	0.677857	0.710062	0.15547	0.802264	0.00913339	0.432427	0.504241	0.105053	0.981789	0.0477594	0.509149	0.460805	0.085023	0.0480573	0.0204641	0.263395	0.441279	5	18	0.277778
PUM2	216221_s_at				6.54e-06	0.66437	0.0313119	0.0898127	0.045883	0.00214418	0.591593	0.359346	0.115962	0.463616	0.986684	0.707518	0.230411	0.134025	0.124257	0.0179953	0.408144	0.116842	5	18	0.277778
LPXN	216250_s_at				0.0273607	0.193174	0.0677838	0.353977	0.224632	0.00965153	0.786227	0.130287	0.916122	0.593195	0.86422	0.519996	0.463245	0.700373	0.712616	0.00295405	0.00329874	0.000268555	5	18	0.277778
GRM8	216255_s_at				0.251697	0.712717	0.604007	0.629076	0.0115474	0.878797	0.24483	0.344308	0.637777	0.357113	0.0238119	0.0308613	0.964958	0.272585	0.0285043	0.213691	0.538297	0.0199304	5	18	0.277778
LAMB2	216264_s_at				0.122148	0.228802	0.382349	0.468132	0.170571	0.509374	0.429788	0.918386	0.000708344	0.109905	0.00516099	0.207077	0.539186	0.000448997	0.0268115	0.0785932	0.440291	0.00127957	5	18	0.277778
HOXB9	216417_x_at				0.0677373	0.628253	0.971257	0.796023	0.21888	0.848211	0.212817	0.0619079	0.0332853	0.0558677	0.00252973	0.149482	0.0336214	0.370457	0.470995	0.014783	0.0802569	0.0248071	5	18	0.277778
ABCD1P2	216418_at				0.511179	0.277426	0.741683	0.279837	0.873998	0.516793	0.377953	0.964826	0.001737	0.0615835	0.00455986	0.199344	0.9682	0.0283306	0.497506	0.00897107	0.023937	0.266277	5	18	0.277778
HLA-C	216526_x_at				0.00283199	0.380283	0.129459	0.170578	0.689127	0.00645613	0.521153	0.439082	0.036597	0.0012271	0.293416	0.0441125	0.928901	0.329077	0.583877	0.303259	0.490261	0.66643	5	18	0.277778
PLCG1	216551_x_at				0.0118102	0.0403221	0.188471	0.329842	0.611359	0.106542	0.208306	0.097856	0.113925	0.28862	0.135529	0.596077	0.689408	0.0247927	0.0170819	0.0200282	0.678358	0.562924	5	18	0.277778
RP11-332O19.5	216574_s_at				0.712095	0.22362	0.361546	0.301062	0.157582	0.00546184	0.68406	0.283728	0.223344	0.174156	0.449209	0.213523	0.00581047	0.00468955	0.0882329	0.00024313	0.0167735	0.85768	5	18	0.277778
CEACAM21	216605_s_at				0.0965168	0.244588	0.607207	0.217635	0.132423	0.0436362	0.983178	0.765061	0.88264	0.534302	0.023704	0.55644	0.944921	0.293283	0.0203998	0.0023994	0.567805	0.0377568	5	18	0.277778
DR1	216652_s_at				0.00064523	0.252275	0.706769	0.0278802	0.23181	0.364134	0.869663	0.838884	0.173813	0.252355	0.331794	0.295881	0.0122944	0.216154	0.51947	0.0148847	0.0357674	0.209782	5	18	0.277778
MORC2	216863_s_at				0.521028	0.997276	0.111992	0.721157	0.34372	0.0236018	0.0439658	0.115925	0.178114	0.0232258	0.841184	0.148717	0.0476582	0.224823	0.642742	0.0470467	0.137638	0.622628	5	18	0.277778
GRM8	216992_s_at				0.0459927	0.798103	0.0220935	0.134404	0.353514	0.198583	0.724148	0.327177	0.953718	0.792416	0.163039	0.415099	0.727397	0.0258944	0.0323178	0.094817	0.0105461	0.361805	5	18	0.277778
GEMIN4	217099_s_at				0.0555463	0.0461478	0.533323	0.0742158	0.0339562	0.552645	0.13752	0.279427	0.188277	0.0109875	0.0223713	0.0022949	0.0596136	0.192598	0.196838	0.586775	0.214143	0.371862	5	18	0.277778
MUC4	217110_s_at				0.891479	0.0952654	0.421391	0.0489093	0.301002	0.729436	0.0634165	0.580753	0.158617	0.174055	0.0376393	0.491859	0.408246	0.854582	0.731991	0.00508552	0.00762039	0.0166521	5	18	0.277778
DGCR14	217285_at				0.72645	0.576054	0.0872968	0.963669	0.0487503	0.256496	0.278987	0.394867	0.0309856	0.641947	0.0333012	0.578318	0.757947	0.150702	0.0156988	0.00358606	0.526693	0.367504	5	18	0.277778
HBA1	217414_x_at				0.146043	0.132178	0.0334382	0.0705298	0.556585	0.0172108	0.633173	0.055723	0.25386	0.0638939	0.0318375	0.00856997	0.218903	0.0086195	0.0590645	0.0796828	0.367797	0.341647	5	18	0.277778
HLA-E	217456_x_at				0.223128	0.311283	0.108026	0.308207	0.440844	0.0218066	0.0229383	0.0212842	0.0642613	0.00473085	0.0595335	0.00311862	0.709113	0.120243	0.107745	0.879765	0.983106	0.687576	5	18	0.277778
COX7C	217491_x_at				0.00227754	0.755834	0.205005	0.02273	0.300502	0.102359	0.824523	0.120613	0.245205	0.815843	0.0551364	0.11493	0.00343385	0.282233	0.353189	0.189471	0.0162571	0.0174669	5	18	0.277778
PTEN	217492_s_at				0.0329216	0.00307223	0.151392	0.509799	0.720448	0.145187	0.775386	0.440439	0.181444	0.662242	0.780056	0.529238	0.0222321	0.132842	0.122205	0.00201045	0.0203428	0.306423	5	18	0.277778
IDE	217496_s_at				0.00522297	0.173368	0.532291	0.853232	0.38278	0.0230564	0.139331	0.132164	0.405878	0.0363665	0.882665	0.23239	0.286607	0.973242	0.541077	0.034451	0.0533553	0.0119461	5	18	0.277778
GGA1	217560_at				0.0211667	0.546796	0.111886	0.903761	0.743573	0.768328	0.939842	0.288415	0.00719222	0.0154696	0.097058	0.170147	0.943492	0.475762	0.567943	0.0314036	0.0297859	0.185239	5	18	0.277778
ITM2B	217731_s_at				0.0289536	0.998053	0.402736	0.445903	0.570591	0.849225	0.0554004	0.968957	0.312487	0.380899	0.0417672	0.0339301	0.00143017	0.48429	0.440844	0.0263073	0.410637	0.793718	5	18	0.277778
RAB31	217762_s_at				0.0509198	0.856453	0.464412	0.812781	0.95907	0.158668	0.222124	0.695947	0.00283525	0.00326943	0.0699371	0.197195	0.00284959	0.0609851	0.4323	0.960519	0.0450101	0.0168094	5	18	0.277778
WBP11	217822_at				0.00822062	0.0679292	0.660987	0.176091	0.392542	0.0205975	0.0963246	0.443737	0.0339285	0.0329801	0.800395	0.700243	0.0909549	0.0190875	0.0976083	0.0513111	0.590672	0.585743	5	18	0.277778
DDX41	217840_at				0.0303705	0.322625	0.211431	0.209563	0.328334	0.0012276	0.647049	0.425941	0.182594	0.0236584	0.200385	0.0305471	0.656089	0.77931	0.570115	0.00965535	0.174934	0.170447	5	18	0.277778
ARL8B	217852_s_at				0.278538	0.0864392	0.0402889	0.509745	0.449447	0.000949918	0.0151373	0.808411	0.791457	0.196487	0.757617	0.399007	0.0130497	0.728329	0.554917	0.0235292	0.815509	0.219049	5	18	0.277778
BACE2	217867_x_at				0.0186727	0.586097	0.595061	0.292683	0.778978	0.447829	0.142209	0.2589	0.0489667	0.0586667	0.117122	0.0284977	0.321762	0.289104	0.0379803	0.837444	0.853556	0.0216452	5	18	0.277778
C16orf58	217891_at				0.294501	0.136823	0.559752	0.839911	0.0103455	0.482296	0.521291	0.659387	0.208846	0.763739	0.561369	0.282711	0.011933	0.00533428	0.00988521	0.159301	0.464239	0.0209331	5	18	0.277778
MAN1A2	217922_at				0.00064271	0.809511	0.0243931	0.141799	0.296007	0.0453914	0.350284	0.250844	0.774353	0.933465	0.419172	0.592833	0.0230919	0.280395	0.405977	0.00311965	0.379402	0.511004	5	18	0.277778
KCMF1	217938_s_at				0.252321	0.00555284	0.511254	0.118674	0.243944	0.0205652	0.43068	0.665711	0.0305015	0.0817665	0.0405264	0.0542655	0.124029	0.532491	0.426198	0.0521923	0.439136	0.00769111	5	18	0.277778
MRPS35	217942_at				0.310344	0.227666	0.0188086	0.41361	0.171245	0.0119094	0.728485	0.289552	0.423844	0.107917	0.66257	0.885468	0.431828	0.0483497	0.049441	0.00832117	0.898379	0.910913	5	18	0.277778
CHCHD3	217972_at				0.0506649	0.0343809	0.201154	0.860036	0.476155	0.224388	0.514291	0.589138	0.559388	0.394654	0.0769785	0.0697522	0.0142136	0.0147815	0.0100195	0.016021	0.68226	0.877305	5	18	0.277778
CCNB1IP1	217988_at				0.544689	0.434175	0.0246439	0.414953	0.482248	0.0992644	0.566871	0.357922	0.0228406	0.150721	0.175977	0.327207	0.994726	0.0327223	0.0515094	0.0162266	0.0300802	0.955239	5	18	0.277778
FKBP3	218003_s_at				0.0498129	0.301937	0.628273	0.371159	0.0832833	0.00792554	0.979305	0.453231	0.0232283	0.36479	0.0164138	0.150961	0.00566863	0.676738	0.89321	0.378847	0.632973	0.097522	5	18	0.277778
BRP44L	218024_at				0.831586	0.0936945	0.19035	0.644816	0.07419	0.94727	0.691552	0.44646	0.27748	0.231727	0.580388	0.0173284	0.286568	0.0419815	0.0267606	0.00231839	0.0386198	0.0974873	5	18	0.277778
SLC38A2	218041_x_at				0.0433607	0.916935	0.109042	0.421651	0.683734	0.158719	0.61666	0.0345541	0.991318	0.95416	0.284353	0.213669	0.775127	0.985659	0.995903	0.032398	0.00547117	0.048124	5	18	0.277778
COPS4	218042_at				0.0138159	0.15535	0.228356	0.961614	0.529384	0.0187645	0.994483	0.131526	0.905958	0.292368	0.343212	0.874197	0.0158395	0.03892	0.0896432	0.0192229	0.567157	0.943064	5	18	0.277778
UFM1	218050_at				0.000259723	0.516146	0.0453313	0.792185	0.830722	0.126267	0.196279	0.826407	0.191328	0.142787	0.54081	0.308576	0.105885	0.344028	0.179163	0.0016795	0.0387139	0.0484461	5	18	0.277778
SMAP1	218137_s_at				0.10745	0.281079	0.156093	0.662334	0.177308	0.32114	0.335858	0.585128	0.774918	0.900821	0.466921	0.366806	0.00516544	0.00716504	0.0224123	0.006975	0.740713	0.0146687	5	18	0.277778
AP5M1	218139_s_at				0.302973	0.0578885	0.144689	0.796194	0.129926	0.0272441	0.97055	0.314951	0.112952	0.893819	0.831694	0.44898	0.0359097	0.0105467	0.0322551	0.00226882	0.641816	0.362864	5	18	0.277778
APPL1	218158_s_at				0.528434	0.12765	0.008316	0.221779	0.306577	0.067666	0.377203	0.552046	0.921817	0.692498	0.914627	0.668781	0.00165599	0.0314387	0.00432899	0.0500067	0.953259	0.0344604	5	18	0.277778
STMN3	218207_s_at				0.0496373	0.249634	0.309187	0.390659	0.153465	0.372844	0.682786	0.259778	0.010483	0.0765516	0.0258015	0.0358954	0.886197	0.184234	0.154397	0.0162984	0.066706	0.709464	5	18	0.277778
SCPEP1	218217_at				0.614831	0.274566	0.886093	0.915426	0.16644	0.394658	0.869425	0.191048	0.764801	0.745954	0.0492384	0.259718	0.00277774	0.778587	0.425546	0.0150987	0.0111611	0.0213156	5	18	0.277778
ARFIP1	218230_at				0.0181842	0.271202	0.014292	0.463833	0.568668	0.694399	0.246821	0.83567	0.360498	0.608334	0.47345	0.988279	0.0436167	0.944839	0.515868	0.0141955	0.200553	0.0281067	5	18	0.277778
CKAP2	218252_at				0.00604459	0.650383	0.0441442	0.104314	0.00488366	0.00677443	0.847909	0.817248	0.617832	0.850718	0.984744	0.926199	0.602053	0.0518305	0.65352	0.23861	0.195025	0.000705551	5	18	0.277778
AC040173.1	218259_at				0.00685354	0.285611	0.122663	0.940706	0.387735	0.0357658	0.428779	0.616484	0.739773	0.649739	0.677463	0.412539	0.00507289	0.320937	0.0798794	0.009195	0.17647	0.0118924	5	18	0.277778
MSTO1	218296_x_at				0.369039	0.244029	0.424566	0.597161	0.23268	0.0533003	0.404419	0.61038	0.691811	0.443163	0.707262	0.353843	0.0445244	0.0305763	0.344184	0.00467121	0.00482741	0.00880455	5	18	0.277778
RNPEPL1	218301_at				0.000111857	0.392135	0.414709	0.216887	0.0373261	0.0441547	0.763368	0.89267	0.472012	0.697338	0.458231	0.674384	0.0279631	0.30705	0.511076	0.013956	0.937565	0.180884	5	18	0.277778
OSBPL11	218304_s_at				0.0362976	0.0864668	0.0385484	0.623559	0.052084	0.384233	0.728718	0.269863	0.370889	0.884531	0.967901	0.688649	0.0178677	0.676758	0.288221	0.00960944	0.0406882	0.228507	5	18	0.277778
MAP4K3	218311_at				0.0437074	0.210619	0.0151452	0.855858	0.229155	0.16637	0.492844	0.723443	0.810362	0.823403	0.562049	0.515415	0.0255666	0.951675	0.590718	0.00349962	0.351624	0.00161994	5	18	0.277778
ZWILCH	218349_s_at				0.192546	0.978401	0.18984	0.790457	0.999633	0.0242042	0.0232255	0.152662	0.260403	0.330531	0.0824475	0.183005	0.0169337	0.616165	0.00533319	0.662439	0.495664	0.0237336	5	18	0.277778
AKTIP	218373_at				0.40137	0.0401338	0.855174	0.454448	0.778108	0.656483	0.79224	0.1912	0.0366887	0.0421736	0.1986	0.476529	0.450239	0.979837	0.991351	0.0110591	0.562019	0.0413504	5	18	0.277778
RBM7	218379_at				0.867987	0.388864	0.970673	0.357478	0.649794	0.0402078	0.388513	0.433735	0.367872	0.140514	0.74359	0.167994	0.0260884	0.0203128	0.0388064	0.00104068	0.764631	0.285312	5	18	0.277778
SNF8	218391_at				0.000102198	0.795197	0.118181	0.684182	0.292167	0.0288461	0.633196	0.672208	0.0680116	0.178442	0.0215207	0.0298473	0.119741	0.400842	0.154452	0.00541832	0.500855	0.227395	5	18	0.277778
C14orf133	218431_at				0.630924	0.0185789	0.262659	0.0436995	0.134233	0.390795	0.221371	0.518731	0.0238971	0.0683751	0.113489	0.235918	0.0909721	0.333425	0.0438553	0.114615	0.995214	0.00567281	5	18	0.277778
LZTFL1	218437_s_at				0.381905	0.107583	0.00633047	0.174209	0.255296	0.00412391	0.0843726	0.0489355	0.271217	0.598025	0.428265	0.497014	0.213595	0.137442	0.188802	0.0031967	0.0456314	0.134978	5	18	0.277778
ALG12	218444_at				0.0185069	0.458018	0.0157882	0.69664	0.439603	0.0248832	0.948487	0.448033	0.77136	0.876912	0.377502	0.934621	0.0841164	0.313931	0.212221	0.0236086	0.0098345	0.194844	5	18	0.277778
FAM13B	218518_at				0.00352512	0.865984	0.0142577	0.207916	0.831544	0.000659982	0.260899	0.696443	0.72823	0.209541	0.496419	0.239281	0.175327	0.934589	0.959228	0.00369592	0.0274882	0.091712	5	18	0.277778
FAM82B	218549_s_at				0.842046	0.0257598	0.621433	0.854817	0.61229	0.749789	0.520878	0.241843	0.194494	0.818152	0.576591	0.893176	0.0151136	0.0266995	0.0585362	0.0368965	0.0237611	0.212633	5	18	0.277778
MRPL39	218558_s_at				0.0179381	0.279761	0.307602	0.717071	0.00346569	0.134501	0.173196	0.0598792	0.79509	0.68361	0.8947	0.632346	0.0645168	0.0653431	0.0456036	0.00370761	0.00422607	0.613676	5	18	0.277778
AC083899.3	218575_at				4.06e-05	0.473974	0.307222	0.304267	0.0357362	0.00293073	0.194438	0.769207	0.978093	0.453919	0.756409	0.279594	0.40252	0.00194784	0.00602615	0.325764	0.303694	0.12505	5	18	0.277778
ABHD4	218581_at				0.0397706	0.787106	0.99056	0.367504	0.758577	0.104875	0.848652	0.162591	0.497979	0.440812	0.0454744	0.55495	0.151833	0.44495	0.348178	0.00981546	0.010655	0.0148451	5	18	0.277778
FAM114A2	218588_s_at				0.00257553	0.0891668	0.0817549	0.651211	0.0100403	0.000703497	0.90161	0.263128	0.198507	0.121704	0.890525	0.977772	0.0923218	0.00646101	0.0673297	0.314679	0.250737	0.000937618	5	18	0.277778
TFB2M	218605_at				0.660316	0.0955855	0.0877738	0.804469	0.107699	0.0403979	0.604628	0.464473	0.00153044	0.0569531	0.538971	0.63599	0.155042	0.00809701	0.00677574	0.00157814	0.267548	0.565685	5	18	0.277778
ZNF277	218645_at				0.137412	0.132324	0.387132	0.317592	0.362207	0.0326868	0.970944	0.93286	0.890152	0.897123	0.97995	0.956861	0.0178772	0.0402467	0.0707484	0.00312761	0.789087	0.0317641	5	18	0.277778
DYSF	218660_at				0.0242042	0.550097	0.933155	0.0833585	0.44105	0.00249858	0.0383383	0.32268	0.672392	0.81212	0.505677	0.569613	0.407549	0.024848	0.158363	0.0153315	0.782779	0.252174	5	18	0.277778
PCTP	218676_s_at				0.0108341	0.581326	0.631634	0.687239	0.157108	0.64423	0.760922	0.748186	0.709335	0.685835	0.446399	0.984725	0.873753	0.0215088	0.00734876	0.0232865	0.00487248	0.0597875	5	18	0.277778
RNF111	218761_at				0.00800543	0.0357514	0.233255	0.877381	0.108485	0.020607	0.902608	0.403141	0.323038	0.442593	0.669337	0.767258	0.0331104	0.309458	0.221642	0.0186131	0.604849	0.0611497	5	18	0.277778
STX18	218763_at				0.00533181	0.827554	0.328824	0.400749	0.430938	0.235742	0.633139	0.65358	0.0393992	0.431868	0.00343284	0.275989	0.386011	0.370191	0.451327	0.00316201	0.0478112	0.0721444	5	18	0.277778
ORAI2	218811_at				0.0494664	0.15548	0.0252451	0.457874	0.0258957	0.328801	0.920467	0.767792	0.75644	0.568661	0.606366	0.867382	0.734201	0.0071911	0.0316999	0.146766	0.35841	0.303649	5	18	0.277778
TRMT11	218877_s_at				0.442757	0.0289487	0.0281263	0.345167	0.276711	0.474555	0.410847	0.408915	0.837377	0.494403	0.235162	0.9352	0.0146766	0.0269731	0.130308	0.00238629	0.952539	0.420379	5	18	0.277778
GALNT12	218885_s_at				0.421394	0.443617	0.647837	0.0340132	0.173452	0.0330702	0.0772491	0.046004	0.0431006	0.598275	0.523145	0.196499	0.131856	0.212889	0.461159	0.0195965	0.195737	0.0900603	5	18	0.277778
FAM193B	218920_at				0.000400781	0.453924	0.259042	0.27145	0.54382	0.444228	0.897667	0.725785	0.0343374	0.0461525	0.0367615	0.158014	0.873423	0.0302709	0.163098	0.1121	0.95209	0.0783831	5	18	0.277778
MYNN	218926_at				0.00100822	0.175436	0.263813	0.0367513	0.146023	0.101009	0.852256	0.709913	0.408725	0.0411975	0.34221	0.11036	0.222634	0.00152375	0.000397317	0.305931	0.0598569	0.76911	5	18	0.277778
EFTUD1	218973_at				0.0115232	0.599358	0.19336	0.167255	0.211689	0.0339361	0.51278	0.873651	0.132308	0.0299075	0.294092	0.5144	0.0354036	0.883536	0.912083	0.0873242	0.223044	0.0202386	5	18	0.277778
FASTKD1	219002_at				0.00707534	0.60285	0.0843466	0.827698	0.0142663	0.000198647	0.927036	0.671858	0.110763	0.607495	0.681564	0.779253	0.0785967	0.0365116	0.00125988	0.543353	0.206947	0.609122	5	18	0.277778
PLEKHA1	219024_at				0.00452984	0.862249	0.796086	0.342877	0.0784605	0.173437	0.0266819	0.0872559	0.0605629	0.460717	0.0368666	0.345589	0.178272	0.834164	0.641826	0.0531945	0.00481791	6.73e-06	5	18	0.277778
RASAL2	219026_s_at				0.0271134	0.0353726	0.602674	0.897978	0.812992	0.863824	0.97224	0.957573	0.388585	0.509958	0.018564	0.0476035	0.96752	0.0303508	0.349146	0.233931	0.103304	0.160977	5	18	0.277778
TINAGL1	219058_x_at				0.922902	0.77052	0.119068	0.0495022	0.593558	0.0433294	0.0282923	0.548786	0.248477	0.163564	0.809754	0.235024	0.36446	0.190302	0.0393433	0.0103704	0.649919	0.97449	5	18	0.277778
GPATCH2	219078_at				0.546599	0.023589	0.076243	0.0572931	0.307151	0.0202766	0.488281	0.0885066	0.521066	0.643774	0.363091	0.865935	0.856587	0.0479287	0.927486	0.00185506	0.608454	0.0207567	5	18	0.277778
SHQ1	219083_at				0.00471743	0.211654	0.150456	0.0836932	0.195851	0.00509157	0.118467	0.555203	0.895712	0.882026	0.849293	0.900338	0.0184752	0.835605	0.766904	0.0298992	0.0389475	0.136543	5	18	0.277778
PID1	219093_at				0.573689	0.344485	0.911687	0.513657	0.50329	0.136215	0.335653	0.831435	0.0393771	0.433667	0.107741	0.44437	0.0442316	0.579074	0.538578	0.0488783	0.045595	0.0184971	5	18	0.277778
C3orf18	219114_at				0.0599777	0.0493728	0.191737	0.618196	0.0289872	0.301173	0.910602	0.81022	0.0275229	0.0339971	0.251372	0.176724	0.026994	0.75803	0.895896	0.0506832	0.757142	0.12734	5	18	0.277778
TRMT13	219130_at				0.00970114	0.488616	0.176864	0.125144	0.0651316	0.014874	0.448258	0.723355	0.0167499	0.217513	0.0637915	0.369997	0.274551	0.0788908	0.0169636	0.0249935	0.915818	0.309587	5	18	0.277778
IFT74	219174_at				0.997714	0.106353	0.916666	0.646129	0.613304	0.00114625	0.106356	0.0867992	0.0430898	0.136377	0.272428	0.790676	0.089251	0.00271116	0.0299053	0.0629362	0.258024	0.0201144	5	18	0.277778
OGDHL	219277_s_at				0.0436207	0.859936	0.276529	0.345547	0.619956	0.991469	0.519209	0.0829034	0.081693	0.0371656	0.456959	0.48316	0.0305159	0.0815359	0.021178	0.807169	0.503139	0.0291332	5	18	0.277778
OLA1	219293_s_at				0.0183963	0.161953	0.208824	0.52241	0.0410914	0.0103431	0.595463	0.810422	0.0348175	0.102466	0.0411928	0.141861	0.081078	0.108409	0.138165	0.267582	0.663593	0.0649029	5	18	0.277778
CEP76	219311_at				0.00839995	0.127324	0.835563	0.685449	0.449628	0.0252316	0.511897	0.475623	0.260436	0.000912818	0.840566	0.0422504	0.131816	0.952982	0.481205	0.00451543	0.703485	0.752967	5	18	0.277778
MPP5	219321_at				0.0143569	0.0402174	0.98489	0.596362	0.388741	0.586195	0.183389	0.277488	0.908233	0.667557	0.646095	0.563863	0.018652	0.870217	0.851007	0.0145183	0.66136	0.0207327	5	18	0.277778
DDX31	219328_at				0.22337	0.9892	0.181732	0.209387	0.360639	0.0171579	0.00241733	0.00743841	0.590411	0.855222	0.181263	0.968095	0.0597574	0.00399435	0.0775348	0.17094	0.747319	0.00528323	5	18	0.277778
CASD1	219342_at				0.200759	0.414818	0.0656673	0.472175	0.0671699	0.0330092	0.0376989	0.446286	0.852688	0.79084	0.958113	0.721413	0.196062	0.423936	0.353509	0.00576979	0.0168595	0.037615	5	18	0.277778
TREM1	219434_at				0.0215086	0.340706	0.923916	0.0357467	0.732566	0.0417686	0.026851	0.82958	0.330562	0.0691931	0.710376	0.37829	0.528278	0.0968448	0.247903	0.0216211	0.855072	0.738974	5	18	0.277778
RIN3	219456_s_at				0.0428099	0.0600316	0.0527506	0.540518	0.337136	0.0145692	0.0459048	0.201791	0.342729	0.72589	0.99631	0.764865	0.214858	0.549181	0.383028	0.0387177	0.823428	0.016988	5	18	0.277778
GIN1	219467_at				0.00477252	0.103551	0.240115	0.679094	0.137222	0.106781	0.290068	0.300401	0.810408	0.523719	0.639453	0.278899	0.0257983	0.0261496	0.0154189	0.00236634	0.63092	0.673666	5	18	0.277778
BCL11B	219528_s_at				0.211506	0.104475	0.971296	0.500457	0.362675	0.0181763	0.10842	0.590227	0.217735	0.0494364	0.281591	0.0325237	0.0266732	0.503217	0.834038	0.0162011	0.272701	0.706006	5	18	0.277778
TSEN2	219581_at				0.00707167	0.336167	0.141908	0.264021	0.201259	0.0174191	0.0054278	0.490119	0.638411	0.291974	0.855609	0.642711	0.254823	0.0418411	0.0835945	0.0386574	0.931148	0.793168	5	18	0.277778
SEMA3G	219689_at				0.152486	0.0258615	0.0934675	0.215759	0.851484	0.0122321	0.730744	0.725428	0.734124	0.01758	0.766699	0.0160638	0.37181	0.0773202	0.0728066	0.0139306	0.216216	0.0933377	5	18	0.277778
ZFHX4	219779_at				0.337543	0.0330315	0.0220834	0.0689001	0.706135	0.0672663	0.0320708	0.0456124	0.795352	0.478443	0.517794	0.910129	0.216642	0.492347	0.86147	0.0143492	0.0998055	0.751457	5	18	0.277778
RP11-471J12.1	219791_s_at				0.0100885	0.766395	0.10121	0.0237295	0.532644	0.455349	0.31475	0.0341299	0.428001	0.293916	0.311917	0.668952	0.422798	0.307445	0.302361	0.018631	0.00403947	0.583737	5	18	0.277778
RP11-1070N10.6	219839_x_at				0.0299088	0.525926	0.842935	0.159751	0.758078	0.586344	0.674477	0.541947	0.937676	0.822049	0.764495	0.821524	0.00104412	0.971755	0.301912	0.024785	0.0162196	0.00239958	5	18	0.277778
PCID2	219940_s_at				0.375863	0.962817	0.259011	0.520133	0.509242	0.0192298	0.554722	0.368917	0.0121184	0.00405392	0.18663	0.041086	0.542901	0.370139	0.653185	0.0147051	0.63852	0.559	5	18	0.277778
RP11-293I14.2	219941_at				0.0431203	0.793078	0.376133	0.0261048	0.902171	0.100839	0.406564	0.229888	0.706859	0.504829	0.147083	0.520893	0.0864207	0.0167104	0.173455	0.0144837	0.75975	0.0197923	5	18	0.277778
APOBR	220023_at				0.0404232	0.0163678	0.306763	0.0139205	0.689191	0.00061849	0.700586	0.59297	0.863241	0.233843	0.171527	0.394228	0.1756	0.429796	0.543976	0.00421011	0.442893	0.858409	5	18	0.277778
SOHLH2	220129_at				0.00957458	0.844749	0.248045	0.605064	0.541563	0.365219	0.395427	0.529868	0.090888	0.00935579	0.0255932	0.0003192	0.999293	0.619568	0.381107	0.00930775	0.495813	0.0736924	5	18	0.277778
TMPRSS3	220177_s_at				0.0123794	0.385701	0.00208284	0.340582	0.942484	0.032974	0.262749	0.295982	0.751446	0.68895	0.295673	0.0210363	0.523769	0.537725	0.0883337	0.00341952	0.121417	0.563566	5	18	0.277778
EIF5A2	220198_s_at				0.751008	0.186234	0.52396	0.866128	0.79693	0.447684	0.349605	0.0148471	0.904301	0.0117687	0.882809	0.00221418	0.627638	0.329661	0.586431	0.537869	0.0219847	0.00119395	5	18	0.277778
THADA	220212_s_at				0.01535	0.783277	0.786318	0.476474	0.190661	0.0338818	0.83176	0.612546	0.15573	0.0126287	0.244558	0.999946	0.655714	0.684601	0.856891	0.129281	0.0133196	0.0068423	5	18	0.277778
HYAL4	220249_at				0.647607	0.65802	0.354206	0.460506	0.275304	0.113984	0.483567	0.0177438	0.00936088	0.401114	0.00483589	0.20615	0.782469	0.30944	0.309687	0.00294461	0.676892	0.00619996	5	18	0.277778
PHC3	220328_at				0.00924664	0.797589	0.507289	0.551676	0.42004	0.217326	0.0116202	0.0762789	0.890856	0.480006	0.0573539	0.712572	0.0868215	0.0221194	0.0503738	0.0450879	0.381895	0.0358347	5	18	0.277778
SAMSN1	220330_s_at				0.957575	0.100127	0.737501	0.413893	0.594863	0.617302	0.93904	0.65775	0.265835	0.722785	0.638916	0.202847	0.00526157	0.00492469	0.000261348	0.0219523	0.0950473	0.00223531	5	18	0.277778
ZNF214	220497_at				0.0107583	0.529816	0.172674	0.536232	0.616251	0.0035399	0.890437	0.447862	0.00686495	0.210251	0.0496389	0.556963	0.338709	0.331573	0.979358	0.0239878	0.103962	0.842862	5	18	0.277778
FAM106A	220575_at				0.712487	0.918673	0.650881	0.366628	0.710463	0.451296	0.214701	0.0760501	0.00749835	0.00084683	0.0185098	0.00322303	0.14735	0.602556	0.767524	0.00134135	0.84719	0.889713	5	18	0.277778
GPR89A	220642_x_at				0.0392942	0.199135	0.0366127	0.838694	0.123392	0.00404934	0.604058	0.0495467	0.80162	0.0956992	0.797875	0.183989	0.389149	0.427381	0.96758	8.26e-05	0.245324	0.27599	5	18	0.277778
PPP4R4	220673_s_at				0.801076	0.732747	0.379482	0.397983	0.117734	0.0126317	0.214319	0.578969	0.583932	0.0464827	0.476662	0.426537	0.889373	0.0188133	0.0169118	0.00220514	0.884427	0.262172	5	18	0.277778
ZNF614	220721_at				0.24975	0.705221	0.745587	0.0950935	0.497632	0.314564	0.68112	0.756013	0.00966305	0.01627	0.0026516	0.0071263	0.243175	0.300937	0.786731	0.0486166	0.450474	0.272972	5	18	0.277778
ZNF221	220847_x_at				0.0380574	0.966572	0.170677	0.0253928	0.737705	0.0320636	0.314284	0.399697	0.22292	0.216504	0.647542	0.25558	0.936087	0.053851	0.164773	0.0442436	0.0309482	0.207998	5	18	0.277778
SLC38A2	220924_s_at				0.0112426	0.570333	0.11777	0.581753	0.584055	0.68866	0.722866	0.0284758	0.997041	0.928706	0.313304	0.260719	0.511234	0.905605	0.88278	0.0276722	0.00782081	0.0363649	5	18	0.277778
NAA35	220925_at				0.00829467	0.250419	0.0495183	0.572146	0.6317	0.00943392	0.0233109	0.101467	0.752643	0.771626	0.166013	0.777953	0.340642	0.222745	0.475053	0.0401585	0.838381	0.139611	5	18	0.277778
PGLYRP4	220944_at				0.0137644	0.558382	0.442833	0.142327	0.355159	0.0159076	0.363314	0.822067	0.0427827	0.811648	0.0106621	0.757735	0.753551	0.845515	0.874248	0.0149984	0.818823	0.374169	5	18	0.277778
NMRK2	221051_s_at				0.524712	0.820849	0.396486	0.568685	0.711172	0.134447	0.22432	0.0225072	0.0204982	0.0283989	0.0020825	0.00411078	0.128854	0.859535	0.765176	0.0552684	0.252826	0.153006	5	18	0.277778
COTL1	221059_s_at				3.32e-05	0.843683	0.156936	0.110733	0.845094	0.0521683	0.412486	0.442198	0.0368031	0.0349463	0.410826	0.196432	0.0880846	0.0672169	0.345964	0.12065	0.000324796	0.000670135	5	18	0.277778
NBEA	221207_s_at				0.806958	0.130238	0.787837	0.189782	0.417918	0.0335049	0.0150789	0.764723	0.0203743	0.403858	0.13449	0.657011	0.0617724	0.0484007	0.100203	0.0253439	0.123783	0.769076	5	18	0.277778
CISH	221223_x_at				0.000190398	0.0235636	0.594398	0.0193041	0.704319	0.480176	0.674777	0.875991	0.795456	0.38537	0.978493	0.849122	0.310401	0.639137	0.531888	0.0486434	0.00573642	0.0960174	5	18	0.277778
BACH2	221234_s_at				0.00298087	0.762921	0.340729	0.54957	0.161942	0.0259452	0.356041	0.44324	0.159436	0.0313537	0.604671	0.0429807	0.193008	0.468328	0.847773	0.620273	0.105077	0.0118545	5	18	0.277778
STMN4	221236_s_at				0.0684965	0.846619	0.721029	0.186491	0.18937	0.0471749	0.13135	0.395386	0.022699	0.420264	0.0469909	0.923966	0.779128	0.228978	0.0999441	0.0435422	0.0132751	0.091768	5	18	0.277778
SMG9	221335_x_at				0.0328637	0.252537	0.174994	0.931685	0.844329	0.713731	0.0938183	0.820802	0.0029158	0.468773	0.0121866	0.267166	0.547835	0.0170649	0.215134	0.00770705	0.231858	0.652845	5	18	0.277778
P2RX2	221372_s_at				0.227979	0.850661	0.0147095	0.882547	0.0238152	0.117219	0.992671	0.888215	0.370288	0.921874	0.0370178	0.148822	0.234204	0.82041	0.259733	0.0490203	0.0489046	0.254074	5	18	0.277778
RP11-325O24.1	221428_s_at				0.0600384	0.664443	0.675749	0.493212	0.124536	0.115539	0.0301673	0.655762	0.749939	0.382669	0.788211	0.84852	0.969228	0.0119335	0.0353676	0.00891626	0.369139	0.0176919	5	18	0.277778
B4GALT5	221484_at				8.03e-05	0.770992	0.167765	0.610898	0.0209525	0.0470483	0.159998	0.168679	0.522078	0.243625	0.305428	0.641011	0.0900112	0.0164792	0.10435	0.00533353	0.217636	0.0692862	5	18	0.277778
B4GALT5	221485_at				0.0439948	0.319488	0.0895186	0.0461846	0.551412	0.370885	0.82579	0.812714	0.0180848	0.475644	0.126455	0.0978263	0.0980465	0.00251817	0.0136352	0.842045	0.119161	0.41684	5	18	0.277778
KPNA3	221502_at				0.705329	0.0235925	0.0445606	0.815345	0.996257	0.000103748	0.461841	0.126853	0.941672	0.661879	0.647747	0.280107	0.326388	0.557586	0.713065	0.00336025	0.789958	0.0326179	5	18	0.277778
TNPO2	221507_at				0.038175	0.0153219	0.744575	0.824205	0.0526524	0.123397	0.732149	0.0569458	0.172714	0.0728647	0.00252173	0.0197906	0.181613	0.656374	0.20913	0.0340459	0.483827	0.707881	5	18	0.277778
UTP14A	221514_at				0.73015	0.189886	0.728463	0.423412	0.375166	0.314886	0.210699	0.0687042	0.00327286	0.189674	0.0234183	0.200585	0.58421	0.0280728	0.0457436	0.0488982	0.0652611	0.413836	5	18	0.277778
MARK4	221560_at				0.651543	0.110775	0.372466	0.508314	0.805315	0.0888014	0.912245	0.588499	0.0407909	0.494265	0.0281017	0.230037	0.163802	0.00133073	0.00244819	0.00595057	0.815674	0.843108	5	18	0.277778
APOO	221620_s_at				0.827051	0.430809	0.026653	0.696237	0.720146	0.151266	0.45579	0.539942	0.0493109	0.361654	0.793807	0.576436	0.0397163	0.0739627	0.0120676	0.00367021	0.530721	0.716966	5	18	0.277778
F11R	221664_s_at				0.409629	0.709804	0.261542	0.891207	0.00659761	0.293707	0.586857	0.709231	0.00553746	0.0714795	0.014864	0.465059	0.235057	0.0246499	0.0166253	0.483348	0.263412	0.18585	5	18	0.277778
CLEC7A	221698_s_at				0.618671	0.367743	0.112735	0.147736	0.169869	0.96938	0.27331	0.639728	0.0134291	0.0206255	0.45284	0.517887	0.0267649	0.114387	0.0507475	0.154271	0.0155081	0.0385176	5	18	0.277778
SIKE1	221705_s_at				0.00269527	0.655909	0.493725	0.997592	0.379148	0.00647311	0.195666	0.735797	0.00234233	0.029596	0.157063	0.373072	0.241886	0.227801	0.625673	0.0455571	0.673649	0.254614	5	18	0.277778
CLEC4A	221724_s_at				0.0288587	0.521403	0.532603	0.0910825	0.0419566	0.873481	0.678623	0.0950906	0.185137	0.497917	0.766689	0.562021	0.515517	0.0324209	0.00161115	0.115379	0.228919	0.0260836	5	18	0.277778
PANK3	221751_at				0.828803	0.0882954	0.116872	0.595772	0.0481189	0.0124959	0.338212	0.71166	0.159694	0.425648	0.657195	0.675159	0.0044465	0.393573	0.202281	0.00270307	0.450484	0.00591722	5	18	0.277778
TRABD	221807_s_at				0.000548084	0.147539	0.0388538	0.477243	0.367726	0.021854	0.0352927	0.581199	0.183984	0.349623	0.329502	0.598976	0.274316	0.0374039	0.173569	0.320708	0.411291	0.215168	5	18	0.277778
KANSL2	221821_s_at				0.195897	0.734425	0.00439204	0.550348	0.277937	0.0104886	0.326014	0.231941	0.00438522	0.084802	0.0748148	0.703998	0.0273992	0.989247	0.683416	0.00515661	0.28757	0.516842	5	18	0.277778
TNPO1	221829_s_at				0.147917	0.886727	0.22998	0.66163	0.0353133	0.282266	0.0689617	0.145364	0.00393922	0.298691	0.0151351	0.182389	0.0475236	0.255807	0.471919	0.00784379	0.394758	0.658675	5	18	0.277778
SPCS3	221844_x_at				0.000528062	0.0445823	0.433545	0.723365	0.746129	0.680697	0.197044	0.400423	0.808199	0.375384	0.0282583	0.0179683	0.321825	0.531954	0.405227	0.105237	0.0205942	0.954333	5	18	0.277778
NOMO2	221852_at				0.0100902	0.956341	0.897589	0.567928	0.266188	0.0304317	0.0458414	0.749335	0.328378	0.660208	0.0178365	0.284561	0.669293	0.972656	0.874403	0.0126136	0.39878	0.160368	5	18	0.277778
ZNF143	221873_at				0.839438	0.0220999	0.547554	0.7527	0.228117	0.70145	0.217374	0.681689	0.112794	0.0714573	0.105194	0.022233	0.0222805	0.384126	0.587025	0.0148848	0.0324286	0.787503	5	18	0.277778
GLRX5	221932_s_at				0.59871	0.159507	0.618105	0.999275	0.110316	0.0485423	0.916775	0.424296	0.979083	0.248152	0.185585	0.0296828	0.218403	0.210729	0.0224125	0.0224214	0.184945	0.0313271	5	18	0.277778
EMX2	221950_at				0.0686127	0.236169	0.101034	0.309561	0.271754	0.155799	0.464402	0.851331	0.003825	0.0136504	0.020825	0.0232612	0.892813	0.469276	0.99977	0.055027	0.323135	0.0395788	5	18	0.277778
SIVA1	222030_at				0.00331897	0.339401	0.499255	0.810821	0.438967	0.309854	0.138773	0.94012	0.892475	0.0439618	0.751425	0.0489163	0.0285258	0.607018	0.613891	0.367258	0.53169	0.00430216	5	18	0.277778
FBXO11	222119_s_at				0.0595612	0.186904	0.419775	0.0181152	0.669819	0.0104041	0.592884	0.556114	0.0389571	0.117983	0.335877	0.611768	0.0179034	0.0405811	0.0504097	0.0750631	0.0819144	0.132159	5	18	0.277778
DESI2	222158_s_at				0.00954912	0.525837	0.271897	0.667361	0.0198951	0.0336045	0.991877	0.330467	0.700807	0.543225	0.14953	0.45771	0.0346389	0.269274	0.871494	0.0584969	0.219463	0.0376402	5	18	0.277778
RP11-769O8.3	222180_at				0.00529057	0.0449648	0.0486738	0.418739	0.000451865	0.109037	0.762253	0.280669	0.940237	0.986098	0.952172	0.937369	0.789989	0.138693	0.0335979	0.217489	0.270981	0.391869	5	18	0.277778
TMEM135	222209_s_at				0.145661	0.980677	0.379671	0.718677	0.0407797	0.000861907	0.78631	0.434533	0.749661	0.475729	0.789972	0.497598	0.0134997	0.0449724	0.197642	0.0019315	0.937077	0.271015	5	18	0.277778
ZNF285	222237_s_at				0.0022382	0.316065	0.034012	0.450998	0.95125	0.0286802	0.0413429	0.83227	0.0110856	0.150027	0.113048	0.531518	0.069214	0.494892	0.214705	0.0976971	0.692628	0.162377	5	18	0.277778
SMEK2	222270_at				0.517203	0.268782	0.724921	0.930814	0.918149	0.22022	0.316807	0.346874	0.00595753	0.174294	0.0178614	0.607598	0.00313346	0.404296	0.704461	0.0380337	0.559216	0.0205361	5	18	0.277778
HEY1	44783_s_at				0.545628	0.894566	0.771389	0.599266	0.471118	0.503389	0.705966	0.152014	0.0129641	0.0134621	0.0501056	0.0143827	0.0084726	0.903821	0.909304	0.875162	0.521217	0.0296158	5	18	0.277778
ZNF236	47571_at				0.0233483	0.799604	0.886472	0.828396	0.497733	0.878522	0.540118	0.884161	0.0433203	0.195126	0.00190948	0.0456208	0.818204	0.68884	0.483672	0.257242	0.989268	0.0482109	5	18	0.277778
RASSF4	49306_at				0.245195	0.617499	0.287885	0.660854	0.125942	0.0216031	0.00207735	0.057028	0.0713796	0.175364	0.0406897	0.0688124	0.760434	0.961133	0.33211	0.00776929	0.101066	0.00872703	5	18	0.277778
RAB15	59697_at				0.201235	0.882011	0.226761	0.597012	0.124078	0.982294	0.758791	0.981914	0.164276	0.0474437	0.303064	0.112931	0.476209	0.0194621	0.00597375	0.126353	0.0291905	0.00824501	5	18	0.277778
IFT74	61732_r_at				0.244203	0.108129	0.931221	0.86643	0.576391	0.957568	0.00666847	0.323759	0.0370498	0.0871891	0.914107	0.364727	0.353761	0.0115761	0.00961144	0.00696797	0.880856	0.482548	5	18	0.277778
HEATR6	65493_at				0.00185761	0.0501587	0.245393	0.500637	0.928443	0.484074	0.525123	0.608461	0.0022122	0.0357469	0.0136785	0.036193	0.91363	0.90833	0.24318	0.888733	0.311597	0.139861	5	18	0.277778
ENGASE	65635_at				0.224469	0.302525	0.619877	0.999079	0.151641	0.0413893	0.22907	0.751835	0.132344	0.0570271	0.00390012	0.00424283	0.017865	0.0183802	0.20778	0.0641848	0.379321	0.975258	5	18	0.277778
PTPN21	1320_at	0.927987	0.0088314	0.000298957	0.304572	0.870251	0.0519859	0.700109	0.279591	0.478254	0.0443869	0.499662	0.0183528	0.0880125	0.880503	0.42394	0.208639	0.867824	0.684606	0.011976	0.929259	0.12089	5	21	0.238095
CYP2A6	1494_f_at	0.401505	0.0134181	9.88e-05	0.033186	0.481072	0.979031	0.604295	0.856036	0.102425	0.390347	0.916616	0.892384	0.677988	0.468132	0.759083	0.876831	0.468844	0.335046	0.00848428	0.57562	0.0200804	5	21	0.238095
PLD1	177_at	0.0188639	0.27057	0.016717	0.154719	0.734248	0.00260738	0.112753	0.967497	0.0489328	0.469525	0.0787384	0.396153	0.693998	0.600515	0.976011	0.691135	0.172159	0.57975	0.284685	0.711378	0.0215791	5	21	0.238095
CHST3	32094_at	0.998152	0.685932	8.21e-05	0.821051	0.657542	0.0474675	0.203326	0.122391	0.0422785	0.733729	0.0966714	0.78861	0.696127	0.816749	0.756361	0.552334	0.0768483	0.0129296	0.404431	0.489942	0.0326312	5	21	0.238095
CCL18	32128_at	0.0478692	0.173121	0.00289584	0.829985	0.881958	0.442651	0.816238	0.0516728	0.803893	0.783929	0.276938	0.166954	0.702764	0.174697	0.931488	0.377462	0.0144927	0.114601	0.0436816	0.0805252	0.0058384	5	21	0.238095
NPR1	32625_at	0.0121997	0.794068	2.35e-07	0.627888	0.587096	0.382503	0.971964	0.644938	0.270836	0.953342	0.61469	0.563831	0.0528116	0.250929	0.0140988	0.874569	0.405159	0.382328	0.00857564	0.0324902	0.248547	5	21	0.238095
PVR	32699_s_at	0.758215	0.0304109	1.4e-05	0.065309	0.547	0.253517	0.768128	0.0548985	0.0176294	0.363863	0.686766	0.561757	0.786239	0.924305	0.67357	0.996404	0.0366075	0.0102638	0.104314	0.413685	0.090498	5	21	0.238095
SFN	33322_i_at	0.808933	0.408412	0.0317981	0.00377923	0.340628	0.0994699	0.218335	0.719428	0.0431951	0.210954	0.0993229	0.189565	0.9126	0.00446113	0.1283	0.196072	0.789413	0.813384	0.116935	0.487537	0.0240912	5	21	0.238095
KRIT1	34031_i_at	0.555499	0.0239841	7.02e-06	0.481952	0.551731	0.540248	0.32602	0.689325	0.00210637	0.198407	0.796747	0.0309826	0.300357	0.634267	0.290753	0.140946	0.309602	0.404893	0.0282436	0.929598	0.0881096	5	21	0.238095
RNF19B	36564_at	0.839941	0.128278	0.00524298	0.00284259	0.822698	0.655131	0.0672356	0.737705	0.319141	0.046407	0.977411	0.146	0.303347	0.0469945	0.43089	0.68473	0.0213856	0.0730467	0.448805	0.92398	0.804537	5	21	0.238095
MVK	36907_at	0.978392	0.177818	0.0327643	0.765162	0.292475	0.0186888	0.97064	0.766081	0.582423	0.252722	0.262854	0.27214	0.316233	0.0328731	0.113252	0.661135	0.665658	0.0486075	0.0142628	0.80039	0.283129	5	21	0.238095
RP11-617F23.1	37590_g_at	0.0494808	0.0364763	0.0233376	0.111929	0.742644	0.121318	0.671878	0.210641	0.554125	0.825387	0.610036	0.683705	0.424705	0.143924	0.0992938	0.912797	0.00200207	0.0152332	0.833626	0.623005	0.961518	5	21	0.238095
CLCN7	38069_at	0.98347	0.397045	0.057252	0.0320961	0.934192	0.078768	0.981127	0.398801	0.51152	0.00786946	0.181836	0.311312	0.653405	0.124298	0.279945	0.230837	0.029915	0.0147971	0.0177962	0.513934	0.814126	5	21	0.238095
PRKD2	38269_at	0.535647	0.506655	0.170338	0.569115	0.292396	0.0390006	0.148634	0.645718	0.00109343	0.581386	0.383632	0.146608	0.01534	0.0223478	0.00165448	0.22009	0.346589	0.165504	0.0758592	0.579607	0.216593	5	21	0.238095
RGS14	38290_at	0.874294	0.447286	3.21e-06	0.0658203	0.0329815	0.254854	0.10016	0.12878	0.0069324	0.980118	0.49796	0.537086	0.212789	0.0157575	0.00161366	0.170857	0.952386	0.260246	0.0545891	0.519906	0.60256	5	21	0.238095
WAS	38964_r_at	0.134768	0.0851043	0.382432	0.00213952	0.364873	0.851004	0.0282939	0.712167	0.681233	0.484241	0.113952	0.368578	0.00385184	0.442845	0.002076	0.491856	0.0293039	0.216772	0.0522399	0.683832	0.20518	5	21	0.238095
APBB2	40148_at	0.114325	0.633732	0.752131	0.485263	0.91579	0.193713	0.352396	0.136224	0.832924	0.792277	0.87532	0.0277749	0.00202631	0.301217	0.077174	0.306495	0.00862964	0.0571286	0.0059235	0.277159	0.0134166	5	21	0.238095
STK10	40420_at	0.351334	0.540145	0.19017	0.43625	0.0974624	0.0230981	0.0920851	0.483062	0.0584983	0.952523	0.519724	0.023955	0.00282351	0.144164	0.0155834	0.343408	0.128597	0.209553	0.221378	0.00138123	0.0617538	5	21	0.238095
NCAPH2	40640_at	0.606939	0.0478014	1.59e-06	0.641638	0.836248	0.268159	0.64088	0.601492	0.00150596	0.153217	0.497861	0.295623	0.470824	0.47155	0.333817	0.473372	0.889116	0.848478	0.0253598	0.552495	0.0458125	5	21	0.238095
UNC5B	41856_at	0.446423	0.334159	0.00301977	0.676005	0.361893	0.592502	0.796138	0.470713	0.178041	0.542319	0.536233	0.520188	0.0343123	0.200046	0.00783612	0.459036	0.0825308	0.0400941	0.00860184	0.811492	0.540443	5	21	0.238095
AC006483.1	AFFX-HSAC07/X00351_M_at	0.410412	0.111219	0.0039962	0.242345	0.883398	0.261116	0.947818	0.876605	0.0106369	0.841756	0.101312	0.611155	0.916928	0.339702	0.637313	0.403178	0.0295289	0.0281668	0.0379253	0.158782	0.137166	5	21	0.238095
	P<=0.05	0.165432	0.10055	0.360419	0.13029	0.550824	0.808895	0.679951	0.471543	0.435361	0.535623	0.414613	0.00983211	0.00639935	0.0255585	0.0557003	0.13407	0.901678	0.477635	0.00531552	0.621073	0.00807036	5	21	0.238095
KRT6A	209126_x_at				0.93585	0.77339	0.0107632	0.0219136		0.908475	0.988971	0.817742	0.584394	0.152215	0.395593	0.355151	0.306886	0.0487974	0.0750259	0.0271225	0.192039	0.554358	4	17	0.235294
KCNH6	221023_s_at				0.275997	0.352219	0.0180056	0.57389		0.219106	0.90566	0.184233	0.0785934	0.569903	0.933505	0.476823	0.0417214	0.985094	0.617322	0.0327039	0.863778	0.0381147	4	17	0.235294
CAMSAP3	226494_at							0.675074		0.0315254	0.650006	0.351684	0.454588	0.343971	0.233075	0.290045	0.123535	0.234958	0.0325848		0.0274376	0.189319	3	13	0.230769
FAU	200019_s_at				0.0347701	0.554243	0.403977	0.243348	0.790296	0.290875	0.765779	0.657734	0.00215179	0.161158	0.0054111	0.269927	0.0372766	0.799122	0.623984	0.346721	0.700335	0.207935	4	18	0.222222
NARS	200027_at				0.0134028	0.0621511	0.132153	0.985115	0.146391	0.000136405	0.990245	0.158937	0.803194	0.280846	0.272682	0.0800056	0.0681331	0.233917	0.0499243	0.0117968	0.674647	0.0792903	4	18	0.222222
RPL9	200032_s_at				0.415557	0.861647	0.293482	0.0876033	0.990963	0.0250445	0.725231	0.365612	0.0570155	0.289164	0.0717013	0.123021	0.000533281	0.267642	0.302798	0.0324963	0.102395	0.0177675	4	18	0.222222
AC009245.3	200034_s_at				0.180967	0.99919	0.315045	0.207038	0.437514	0.0222762	0.967361	0.475809	0.0476207	0.363683	0.0505956	0.34702	0.0423648	0.637917	0.643528	0.00062214	0.954808	0.246519	4	18	0.222222
RP11-110H1.2	200038_s_at				0.436101	0.827143	0.376402	0.138519	0.831703	0.034833	0.661494	0.349533	0.0206602	0.36021	0.0234229	0.442572	0.415971	0.889814	0.866268	0.000578018	0.965156	0.704019	4	18	0.222222
RHOA	200059_s_at				0.433916	0.331231	0.12631	0.922458	0.258854	0.528308	0.0976198	0.0302173	0.25375	0.98137	0.0428543	0.23993	0.0873685	0.67243	0.21734	0.00147335	0.141683	0.040369	4	18	0.222222
SNX3	200067_x_at				0.499454	0.114114	0.841209	0.625327	0.57618	0.863791	0.77888	0.129812	0.346418	0.984291	0.922332	0.471414	0.0237825	0.0293002	0.0295644	0.00947159	0.261249	0.345653	4	18	0.222222
GUK1	200075_s_at				0.0106589	0.461389	0.431238	0.290439	0.114966	0.943186	0.646895	0.279743	0.0421375	0.18507	0.0878754	0.265382	0.263423	0.983669	0.392231	0.0415538	0.240747	0.0239907	4	18	0.222222
RP11-110C15.4	200089_s_at				0.0102357	0.779375	0.697299	0.197112	0.523248	0.027691	0.38416	0.607855	0.0437227	0.225015	0.102622	0.249094	0.218362	0.412321	0.71011	0.0126008	0.674052	0.779181	4	18	0.222222
HINT1	200093_s_at				0.00401339	0.458551	0.318775	0.116058	0.785252	0.367554	0.461887	0.679161	0.0779269	0.567793	0.0359531	0.459516	0.0233483	0.422151	0.843392	0.0143495	0.736848	0.155238	4	18	0.222222
MSN	200600_at				0.00134652	0.78802	0.883696	0.391634	0.189267	0.671933	0.954782	0.80091	0.104813	0.0895241	0.0111095	0.0184753	0.115772	0.328939	0.727226	0.693557	0.0827032	0.00639735	4	18	0.222222
MATR3	200624_s_at				0.0303185	0.465331	0.159791	0.149879	0.350876	0.166397	0.96067	0.329338	0.0167761	0.0791429	0.931891	0.931074	0.0802473	0.196898	0.300443	0.0194431	0.0165873	0.635404	4	18	0.222222
SET	200631_s_at				0.151784	0.312383	0.021162	0.90836	0.25763	0.0124892	0.307845	0.700761	0.493478	0.86242	0.270538	0.706195	0.0328193	0.713558	0.878653	0.00411392	0.308201	0.202579	4	18	0.222222
MARCKSL1	200644_at				0.000235639	0.203397	0.054086	0.484893	0.5056	0.819964	0.510804	0.933178	0.301133	0.00839266	0.0836538	0.00526228	0.254075	0.490764	0.59215	0.0341052	0.0861173	0.877965	4	18	0.222222
AC084117.3	200650_s_at				0.216108	0.280195	0.677403	0.786469	0.0967278	0.297978	0.128139	0.0455995	0.0237329	0.0268258	0.0628708	0.103171	0.153653	0.0114713	0.0908764	0.446595	0.830491	0.400613	4	18	0.222222
CALM1	200653_s_at				0.000201549	0.100293	0.784154	0.412423	0.331525	0.452573	0.705624	0.184107	0.559779	0.821325	0.0412059	0.395173	0.141043	0.0401886	0.0485229	0.267324	0.160472	0.983114	4	18	0.222222
HSPA9	200691_s_at				0.00693768	0.891559	0.582509	0.950258	0.928221	0.0118072	0.0104547	0.3743	0.261511	0.30256	0.772262	0.473861	0.0696489	0.794951	0.677096	0.0222807	0.717582	0.275372	4	18	0.222222
AC093106.7	200705_s_at				0.225911	0.62784	0.368774	0.31192	0.74524	0.107224	0.463512	0.727736	0.0243518	0.175576	0.0418233	0.190597	0.0234642	0.526506	0.605616	0.00202477	0.867748	0.25378	4	18	0.222222
PRKCSH	200707_at				0.000122483	0.390344	0.647863	0.483081	0.0263496	0.00313297	0.653342	0.349655	0.898086	0.571684	0.440046	0.274352	0.294937	0.0332709	0.0756048	0.473155	0.114179	0.577036	4	18	0.222222
ACADVL	200710_at				0.619193	0.0661502	0.583985	0.768391	0.618111	0.00162461	0.0441248	0.00969134	0.702722	0.754031	0.0663832	0.0833672	0.0432164	0.344059	0.447696	0.948246	0.741197	0.211138	4	18	0.222222
SKP1	200711_s_at				0.00944747	0.237476	0.0343666	0.15527	0.776523	0.242114	0.134515	0.22632	0.396824	0.967901	0.660864	0.865471	0.0140438	0.562406	0.498611	0.00426245	0.498356	0.62132	4	18	0.222222
ACTR2	200728_at				0.0843084	0.40956	0.238341	0.489786	0.702727	0.244631	0.248959	0.165526	0.32405	0.452471	0.0496242	0.0330093	0.0379669	0.300995	0.496651	0.0335775	0.0705237	0.0701281	4	18	0.222222
GNB1	200746_s_at				0.00342023	0.71808	0.268426	0.705489	0.916024	0.00912252	0.611058	0.948314	0.207872	0.202942	0.309284	0.373075	0.191399	0.544077	0.268064	0.0300987	0.305144	0.00282908	4	18	0.222222
FTH1	200748_s_at				0.017958	0.88049	0.279269	0.60203	0.160171	0.00470303	0.872502	0.469311	0.240223	0.739743	0.0622082	0.79006	0.646374	0.123486	0.995058	0.0320552	0.0891758	0.027953	4	18	0.222222
RAN	200749_at				0.700644	0.142638	0.0876585	0.578427	0.409491	0.00748344	0.526298	0.289955	0.770186	0.755221	0.404894	0.552887	0.0348179	0.649618	0.444475	0.0346034	0.0146776	0.867098	4	18	0.222222
DPYSL2	200762_at				0.119325	0.880027	0.191207	0.800418	0.322238	0.835189	0.34271	0.695774	0.271447	0.107477	0.0459188	0.027312	0.00109391	0.645507	0.560829	0.0374241	0.401442	0.12477	4	18	0.222222
MAT2A	200768_s_at				0.184227	0.871133	0.614208	0.217451	0.131408	0.00303149	0.985049	0.839973	0.0156374	0.233272	0.0126948	0.386598	0.79676	0.121287	0.469859	0.871401	0.00186462	0.0765415	4	18	0.222222
LAMC1	200770_s_at				0.147833	0.0352879	0.000340588	0.624492	0.56113	0.0201795	0.0171269	0.0659867	0.535527	0.117032	0.263613	0.396177	0.269918	0.730134	0.413604	0.503343	0.656695	0.119824	4	18	0.222222
RP11-1035H13.3	200781_s_at				0.0906107	0.868208	0.0710714	0.193163	0.811893	0.0304986	0.876262	0.696325	0.0253958	0.240488	0.165195	0.634659	0.0522116	0.81898	0.796984	0.00376858	0.236926	0.00453351	4	18	0.222222
STMN1	200783_s_at				0.989562	0.936535	0.77938	0.963786	0.329678	0.0073065	0.274118	0.546376	0.298413	0.717125	0.0617671	0.0472081	0.0657505	0.990488	0.720859	0.430057	0.0197262	0.00268823	4	18	0.222222
PEA15	200788_s_at				0.787122	0.450432	0.114272	0.119167	0.076214	0.194116	0.512004	0.511216	0.596282	0.241442	0.506961	0.0328683	0.0282745	0.80579	0.859116	0.76918	0.00954749	0.0447355	4	18	0.222222
DAZAP2	200794_x_at				0.00155426	0.0643431	0.584415	0.404646	0.453467	0.885653	0.484219	0.343272	0.245172	0.949912	0.181907	0.956089	0.314845	0.177091	0.300362	0.0186992	0.0235109	0.0190569	4	18	0.222222
HSPA1A	200800_s_at				0.00275251	0.481242	0.122624	0.0390422	0.134316	0.0438144	0.398792	0.543977	0.468167	0.303092	0.492552	0.454381	0.701673	0.0429735	0.0517338	0.935919	0.104125	0.101892	4	18	0.222222
AC006483.1	200801_x_at				0.553694	0.692097	0.177164	0.05541	0.807926	0.0013733	0.501226	0.866079	0.212313	0.297606	0.145212	0.31154	0.246796	0.0307974	0.0282983	0.899564	0.0685891	0.0366062	4	18	0.222222
TMBIM6	200804_at				0.0129709	0.871002	0.268358	0.714864	0.899617	0.362848	0.00343347	0.0124836	0.399476	0.776388	0.75709	0.87092	0.877864	0.652619	0.71932	0.00697058	0.491128	0.621574	4	18	0.222222
HSPD1	200807_s_at				0.124904	0.362705	0.457308	0.690971	0.433788	0.00264723	0.744734	0.686036	0.0282962	0.207701	0.988054	0.344018	0.0284091	0.0712056	0.0543389	0.0351414	0.291454	0.980944	4	18	0.222222
ZYX	200808_s_at				0.0324583	0.282949	0.179707	0.331929	0.94098	0.00088555	0.678316	0.887179	0.187798	0.721728	0.181845	0.447925	0.869272	0.00530259	0.000827519	0.536069	0.154243	0.124831	4	18	0.222222
BCAP31	200837_at				0.0268432	0.937495	0.761497	0.871493	0.551953	0.0101812	0.755007	0.413721	0.0272839	0.662144	0.187347	0.729364	0.958806	0.407392	0.199824	0.0280931	0.779703	0.509647	4	18	0.222222
CTSB	200839_s_at				0.0355343	0.450573	0.252371	0.107904	0.841483	0.0478843	0.873799	0.372141	0.804422	0.477249	0.465228	0.177106	0.194274	0.374018	0.753825	0.385866	0.0128192	0.00142983	4	18	0.222222
EPRS	200843_s_at				0.0426686	0.223699	0.0304246	0.286843	0.182582	0.0585947	0.304468	0.0835304	0.863089	0.0638154	0.353589	0.753737	0.154996	0.339392	0.583145	0.000618644	0.470464	0.0488189	4	18	0.222222
GNB2	200852_x_at				0.00130105	0.460957	0.108321	0.253114	0.190579	0.00118079	0.503675	0.124512	0.499103	0.798498	0.37786	0.528361	0.950042	0.187519	0.336575	0.0218764	0.686351	0.0461146	4	18	0.222222
NCOR1	200854_at				0.00276754	0.0774537	0.0533226	0.0853077	0.0883028	0.00083145	0.325681	0.509848	0.021663	0.74001	0.65385	0.557246	0.24288	0.637009	0.0999824	0.0209267	0.67307	0.0682857	4	18	0.222222
NCOR1	200855_at				6.28e-09	0.361527	0.108931	0.292339	0.341542	0.985709	0.00852824	0.0270505	0.252414	0.18375	0.262971	0.852431	0.703392	0.846407	0.795478	0.00290299	0.721892	0.269801	4	18	0.222222
PSAP	200866_s_at				0.875064	0.230946	0.127528	0.823036	0.163812	0.0149662	0.0874929	0.0526762	0.669637	0.326154	0.187058	0.605918	0.555734	0.127584	0.0412836	0.00450408	0.0627792	0.00199052	4	18	0.222222
STRAP	200870_at				0.000114581	0.117969	0.512405	0.405374	0.43298	0.328073	0.770052	0.180104	0.88731	0.750911	0.222286	0.242117	0.0298031	0.0438562	0.144218	0.00568369	0.452784	0.89255	4	18	0.222222
M6PR	200901_s_at				0.262204	0.780555	0.861768	0.253281	0.639679	0.0888941	0.0498207	0.912529	0.658182	0.288859	0.846436	0.781535	0.926901	0.0875396	0.445227	0.000765203	0.0203136	0.0471499	4	18	0.222222
RP4-604K5.1	200902_at				0.0229616	0.16896	0.0868347	0.942377	0.948054	0.296174	0.500552	0.557118	0.382348	0.437769	0.489625	0.630923	0.0120327	0.170478	0.115076	0.000917086	0.652565	0.0270655	4	18	0.222222
KTN1	200915_x_at				0.906759	0.312081	0.329578	0.818305	0.651722	0.00369252	0.331531	0.433707	0.661332	0.794855	0.497184	0.571903	0.0462274	0.737423	0.780836	0.0333143	0.720666	0.0137136	4	18	0.222222
TAGLN2	200916_at				0.000424315	0.449115	0.446198	0.792915	0.25562	0.10052	0.342704	0.361864	0.0808055	0.0550045	0.0714077	0.0644944	0.219748	0.0238915	0.0192034	0.642856	0.0310469	0.728909	4	18	0.222222
KDELR1	200922_at				0.0915273	0.119769	0.23297	0.588179	0.975173	0.0041029	0.416916	0.0436235	0.35571	0.724111	0.336442	0.782616	0.0261843	0.53449	0.443721	0.81448	0.712692	0.00923202	4	18	0.222222
SDCBP	200958_s_at				0.835022	0.283627	0.0563555	0.0265994	0.646832	0.646791	0.858663	0.436405	0.762955	0.749141	0.41595	0.113364	0.0341128	0.932962	0.695559	0.0460648	0.318906	0.0215019	4	18	0.222222
SEPHS2	200961_at				0.0685885	0.914475	0.805677	0.263295	0.282435	0.461384	0.431271	0.712579	0.574493	0.563729	0.511567	0.65399	0.029741	0.0277562	0.0113029	0.0271338	0.199502	0.396786	4	18	0.222222
RPL31	200962_at				0.199935	0.529771	0.0282843	0.040538	0.480301	0.935319	0.275743	0.00801884	0.477468	0.900248	0.206619	0.575323	0.010936	0.478608	0.348812	0.648418	0.317139	0.837948	4	18	0.222222
ALDOA	200966_x_at				0.0188575	0.665355	0.135953	0.71768	0.894832	0.000593851	0.303424	0.656546	0.0150284	0.141162	0.0422244	0.160911	0.340957	0.161267	0.0620314	0.0890179	0.96856	0.742782	4	18	0.222222
PPIB	200967_at				3.44e-05	0.24616	0.255944	0.96022	0.198736	0.688751	0.527592	0.744014	0.0087764	0.193734	0.00504682	0.250879	0.385739	0.767597	0.855182	0.00590439	0.653427	0.887881	4	18	0.222222
GNAS	200981_x_at				0.169609	0.509779	0.465356	0.523838	0.465031	0.037697	0.000124844	0.00101703	0.742015	0.665987	0.549577	0.471564	0.900907	0.18046	0.695345	0.00244941	0.536102	0.0958241	4	18	0.222222
IPO7	200995_at				0.625521	0.317976	0.0846415	0.549845	0.0265362	0.00184389	0.361165	0.724766	0.0436585	0.05695	0.279001	0.146111	0.010162	0.33631	0.28636	0.15466	0.325801	0.295608	4	18	0.222222
CKAP4	200999_s_at				0.0182926	0.701111	0.700212	0.549091	0.714944	0.0215143	0.376577	0.24812	0.0313484	0.250208	0.0322852	0.257186	0.378737	0.829005	0.964759	0.54482	0.867612	0.652186	4	18	0.222222
AARS	201000_at				0.037955	0.561359	0.348449	0.316968	0.415804	0.791751	0.0390756	0.0192099	0.582662	0.455448	0.454126	0.685635	0.892375	0.182365	0.0775709	0.00491099	0.43694	0.0572998	4	18	0.222222
CD9	201005_at				0.281991	0.524269	0.590456	0.915849	0.864293	0.301703	0.362465	0.222705	0.604205	0.260044	0.046081	0.722132	0.499891	0.651528	0.0890175	0.031035	0.0180743	0.0397045	4	18	0.222222
HADHB	201007_at				0.151152	0.133756	0.726435	0.538178	0.246745	0.261188	0.132077	0.00789716	0.0417137	0.733504	0.075588	0.0450692	0.403326	0.57664	0.293777	0.0424773	0.195498	0.322912	4	18	0.222222
TXNIP	201008_s_at				0.123089	0.115595	0.952774	0.251927	0.351347	0.775423	0.733712	0.0171457	0.403488	0.686799	0.0209451	0.0423049	0.0840942	0.551571	0.571735	0.00874208	0.493464	0.193161	4	18	0.222222
TXNIP	201009_s_at				0.714616	0.0672183	0.643741	0.31175	0.359983	0.813938	0.705901	0.00871654	0.32364	0.846734	0.0171445	0.0610517	0.0345109	0.515414	0.690991	0.474647	0.300138	0.0478754	4	18	0.222222
EIF5B	201025_at				0.0617085	0.0285064	0.187973	0.392528	0.13142	0.0059116	0.103754	0.570557	0.233024	0.298025	0.647333	0.510504	0.0101998	0.40574	0.368508	0.0490212	0.398969	0.082399	4	18	0.222222
LDHB	201030_x_at				0.974811	0.447532	0.245635	0.540817	0.255911	0.0362268	0.340132	0.311909	0.00556213	0.0362544	0.884134	0.380561	0.220386	0.00592248	0.10226	0.0684555	0.566091	0.190187	4	18	0.222222
HADH	201036_s_at				0.670409	0.253742	0.23549	0.0734823	0.290488	0.0732814	0.267491	0.371733	0.445742	0.558168	0.0903244	0.115953	0.0121094	0.0168985	0.0351128	0.00693099	0.117773	0.262108	4	18	0.222222
RP11-234A1.1	201049_s_at				0.0302745	0.368108	0.56268	0.36845	0.160979	0.452698	0.237146	0.88556	0.00797192	0.0900349	0.07074	0.277269	0.128535	0.942832	0.226323	0.00299491	0.596742	0.0201987	4	18	0.222222
PSMC2	201068_s_at				0.00330365	0.472362	0.0651195	0.195414	0.113057	0.0240887	0.613039	0.234028	0.693443	0.328687	0.348074	0.955831	0.0658072	0.522745	0.485441	0.00382492	0.0253413	0.816184	4	18	0.222222
RPS29	201094_at				0.680002	0.702902	0.332338	0.113891	0.723996	0.211383	0.309771	0.166013	0.0018338	0.116156	0.0142447	0.225872	0.0658521	0.886267	0.685938	0.0280394	0.299704	0.0362514	4	18	0.222222
DAP	201095_at				0.190982	0.940719	0.238801	0.494777	0.0404525	0.255776	0.181817	0.489624	0.825815	0.220646	0.84942	0.276598	0.452888	0.26375	0.000760025	0.000264777	0.0574849	0.000399701	4	18	0.222222
ARF4	201097_s_at				0.277392	0.366865	0.612465	0.291593	0.973886	0.658242	0.370283	0.684624	0.432483	0.44691	0.123923	0.161324	0.0496589	0.827035	0.532881	0.00702231	0.0100671	0.00945857	4	18	0.222222
CSE1L	201112_s_at				0.00509406	0.411938	0.162829	0.645003	0.328893	0.0252252	0.6176	0.11896	0.248276	0.198022	0.143042	0.0702506	0.011986	0.430814	0.114206	0.00229638	0.219652	0.596384	4	18	0.222222
PGD	201118_at				0.46804	0.277151	0.593782	0.329604	0.581533	0.00555013	0.339017	0.451427	0.0207281	0.0237184	0.69518	0.508888	0.679733	0.965298	0.340244	0.00173157	0.851942	0.92653	4	18	0.222222
EIF5A	201122_x_at				0.0101447	0.837305	0.574522	0.89845	0.605545	0.408648	0.00134464	0.0292994	0.276576	0.666544	0.48379	0.575547	0.0479677	0.877536	0.173843	0.528675	0.935791	0.078866	4	18	0.222222
ACLY	201128_s_at				0.202118	0.881546	0.00796455	0.663501	0.297802	0.0511369	0.450025	0.950521	0.965229	0.499642	0.435285	0.248861	0.0486504	0.924501	0.504556	0.00932988	0.831927	0.0171841	4	18	0.222222
HNRNPH2	201132_at				0.0173589	0.174044	0.94523	0.625588	0.161335	0.627569	0.0407913	0.777108	0.788801	0.811972	0.280089	0.236678	0.0375984	0.718153	0.743618	0.00389892	0.284169	0.117927	4	18	0.222222
HLA-DPB1	201137_s_at				0.0308334	0.162457	0.202864	0.197377	0.299735	0.621189	0.605309	0.806511	0.000379282	0.00278613	0.252571	0.296996	0.147066	0.110106	0.56207	0.0869301	0.0228904	0.51355	4	18	0.222222
MFN2	201155_s_at				0.00185068	0.532915	0.217664	0.858275	0.435898	0.165207	0.311704	0.868782	0.667922	0.314033	0.0480916	0.0132652	0.510993	0.862881	0.809516	0.00409303	0.769203	0.777097	4	18	0.222222
RAB5C	201156_s_at				6.57e-06	0.79318	0.303853	0.973118	0.49244	0.0153083	0.00578303	0.0265869	0.615365	0.0652559	0.921057	0.382174	0.414484	0.502542	0.484885	0.29731	0.186293	0.999103	4	18	0.222222
UBA2	201177_s_at				0.0357736	0.0484582	0.246844	0.263108	0.357274	0.0258023	0.733643	0.372926	0.363818	0.791851	0.121649	0.408825	0.0679448	0.212893	0.205477	0.00382504	0.417729	0.72652	4	18	0.222222
ITPR3	201188_s_at				0.32065	0.233873	0.157714	0.345228	0.941851	0.0289333	0.478873	0.201992	0.229941	0.0686225	0.0263381	0.0155809	0.737419	0.061871	0.0211371	0.102381	0.28665	0.890506	4	18	0.222222
PSMD1	201198_s_at				0.001026	0.278008	0.492949	0.481337	0.822416	0.314788	0.148415	0.12822	0.517183	0.296647	0.221034	0.890188	0.00766111	0.847364	0.184124	0.00468841	0.256922	0.00304388	4	18	0.222222
RAD23B	201222_s_at				0.00486062	0.686931	0.189605	0.292381	0.211303	0.851849	0.332098	0.271086	0.946721	0.717237	0.160897	0.0211953	0.00310522	0.598023	0.120095	0.0129512	0.510576	0.19785	4	18	0.222222
CAPZA2	201238_s_at				0.22131	0.0222328	0.396743	0.797836	0.208771	0.623216	0.148954	0.538094	0.75772	0.538053	0.271733	0.866525	0.000717013	0.509779	0.816388	0.00556354	0.0896342	0.0332467	4	18	0.222222
DDX1	201241_at				0.00100151	0.0890376	0.131775	0.878216	0.0471097	0.00145433	0.675331	0.116693	0.948753	0.610544	0.384914	0.503518	0.270472	0.484105	0.696844	0.00259569	0.827741	0.384311	4	18	0.222222
TXNRD1	201266_at				0.0104227	0.391835	0.0403958	0.767811	0.433071	0.564223	0.372483	0.502907	0.392925	0.738711	0.526126	0.199751	0.279236	0.267218	0.0701242	0.120974	0.000800325	0.0168956	4	18	0.222222
AKR1B1	201272_at				0.189778	0.431793	0.423685	0.763949	0.499358	0.269153	0.399793	0.0376046	0.270664	0.963578	0.185044	0.694135	0.194042	0.266671	0.898598	0.00955883	0.045703	0.0429547	4	18	0.222222
SRP9	201273_s_at				0.0235035	0.291539	0.346118	0.040723	0.127766	0.0888362	0.625892	0.257874	0.237217	0.586113	0.976323	0.520913	0.285906	0.0416678	0.453525	0.00394447	0.447826	0.873765	4	18	0.222222
DAB2	201278_at				0.360238	0.0631644	0.0979636	0.686535	0.316499	0.202259	0.5406	0.223212	0.0468307	0.470822	0.0421522	0.524741	0.268133	0.475004	0.942349	0.179844	0.00506109	0.000219357	4	18	0.222222
PPIA	201293_x_at				0.445419	0.734282	0.00975873	0.228376	0.541391	0.0923001	0.315062	0.211585	0.889339	0.610782	0.656368	0.76596	0.593471	0.0053362	0.00367306	0.00539392	0.675637	0.862863	4	18	0.222222
MOB1A	201298_s_at				0.649723	0.315283	0.190432	0.872072	0.654561	0.866852	0.971781	0.76171	0.248691	0.0935109	0.371724	0.283997	0.0286248	0.021794	0.0365174	0.136932	0.0972692	0.0353817	4	18	0.222222
ANP32B	201305_x_at				0.000626829	0.444834	0.556175	0.852956	0.288369	0.902992	0.991915	0.406823	0.0340422	0.584256	0.0103347	0.348845	0.00514509	0.794464	0.461309	0.287997	0.880967	0.380497	4	18	0.222222
2013-09-11	201308_s_at				0.52674	0.656612	0.673147	0.703708	0.616756	0.975828	0.644153	0.378911	0.0916176	0.0430942	0.157444	0.0065968	0.496088	0.0658974	0.551139	0.00657223	0.182778	0.00567058	4	18	0.222222
IFITM2	201315_x_at				0.0421305	0.212985	0.521824	0.440691	0.939311	0.00342755	0.454837	0.35667	0.559473	0.418705	0.630794	0.376638	0.618819	0.0259572	0.0227273	0.192232	0.691553	0.869944	4	18	0.222222
EBNA1BP2	201323_at				0.881129	0.284182	0.0454805	0.357762	0.979786	0.0158914	0.58597	0.601516	0.716348	0.841691	0.823357	0.694216	0.278642	0.594876	0.429051	0.0436437	0.100555	0.0475404	4	18	0.222222
RARS	201330_at				0.0246778	0.695554	0.0271677	0.801796	0.189459	0.220569	0.0891065	0.140341	0.45579	0.649195	0.806927	0.978072	0.571901	0.0449174	0.590897	0.0130162	0.993308	0.46337	4	18	0.222222
CST3	201360_at				0.0117084	0.434716	0.35781	0.810932	0.229777	0.00167793	0.0738453	0.696924	0.538628	0.756746	0.320114	0.186326	0.526433	0.20337	0.13585	0.00264711	0.307339	0.0188049	4	18	0.222222
TMEM109	201361_at				0.0260512	0.306884	0.558747	0.496305	0.579374	0.456266	0.244191	0.11454	0.128164	0.369458	0.464042	0.787542	0.342835	0.0086707	0.00398821	0.0302746	0.931699	0.74925	4	18	0.222222
ANXA7	201366_at				0.482254	0.0439042	0.0952338	0.0540827	0.362204	0.223655	0.989047	0.110694	0.522804	0.646949	0.190832	0.412	0.00222428	0.284372	0.357463	0.0125586	0.195383	0.0428948	4	18	0.222222
ZFP36L2	201367_s_at				0.00393651	0.127972	0.0481157	0.693842	0.0301336	0.0252319	0.0949743	0.293057	0.0537895	0.955591	0.46016	0.500828	0.288457	0.450515	0.214053	0.089044	0.889381	0.358897	4	18	0.222222
ZFP36L2	201369_s_at				0.00111629	0.0357201	0.132829	0.010726	0.998806	0.047029	0.633332	0.387308	0.437635	0.409378	0.804571	0.765704	0.752016	0.0793328	0.13549	0.118876	0.356895	0.442344	4	18	0.222222
PLEC	201373_at				0.00312736	0.368275	0.117084	0.453248	0.0995383	0.0202415	0.0644291	0.249801	0.0472735	0.318675	0.578053	0.633456	0.254113	0.350925	0.328299	0.00645041	0.430534	0.0660062	4	18	0.222222
UBAP2L	201377_at				0.0117181	0.267566	0.248664	0.237544	0.14713	0.477523	0.406359	0.82147	0.195197	0.540042	0.0411584	0.380742	0.218775	0.809848	0.873093	0.386698	0.0438287	0.0138612	4	18	0.222222
UBAP2L	201378_s_at				0.0446273	0.64143	0.63505	0.460312	0.0829506	0.00998447	0.322163	0.285746	0.631115	0.448028	0.180203	0.608183	0.037073	0.282331	0.377696	0.00788804	0.51651	0.305809	4	18	0.222222
AC074182.1	201381_x_at				0.14561	0.0936912	0.938029	0.257821	0.111039	0.0225054	0.737499	0.702805	0.0208865	0.652024	0.271163	0.646277	0.00265288	0.454338	0.161086	0.0144708	0.841271	0.878357	4	18	0.222222
DHX15	201386_s_at				1.15e-05	0.667624	0.0386284	0.603433	0.440011	0.0378968	0.357019	0.065313	0.577557	0.414437	0.464954	0.23602	0.922208	0.9191	0.486904	0.00182089	0.930155	0.301773	4	18	0.222222
PPP1CB	201408_at				0.011221	0.10709	0.00961712	0.942858	0.37774	0.0593489	0.368138	0.10931	0.569514	0.416759	0.378997	0.264851	0.00036151	0.34096	0.693119	0.0552012	0.478919	0.011897	4	18	0.222222
PLEKHB2	201410_at				0.366292	0.195398	0.243663	0.587089	0.308805	0.0283362	0.687247	0.692526	0.045619	0.228952	0.39592	0.495052	0.329129	0.0772195	0.00401628	0.00541656	0.16069	0.15313	4	18	0.222222
HSD17B4	201413_at				0.204079	0.686172	0.0966881	0.847145	0.163013	0.00277398	0.878203	0.147628	0.254702	0.502559	0.80671	0.218961	0.0801691	0.207705	0.0429	0.0247642	0.289703	0.018431	4	18	0.222222
WDR77	201421_s_at				0.00537941	0.43746	0.646456	0.126649	0.036055	0.682105	0.772262	0.21061	0.0346253	0.372334	0.803451	0.769978	0.057659	0.311056	0.695544	0.179646	0.1367	0.0207714	4	18	0.222222
IFI30	201422_at				0.947826	0.103109	0.180624	0.288747	0.26948	0.00536475	0.989783	0.837409	0.00160945	0.362438	0.0557057	0.40341	0.75106	0.345495	0.0759413	0.274617	0.00459877	0.00137287	4	18	0.222222
DPYSL3	201430_s_at				0.0315572	0.46826	0.0390342	0.224342	0.986383	0.851144	0.366834	0.829118	0.12532	0.0427945	0.998176	0.958905	0.879543	0.0493687	0.820722	0.445858	0.493433	0.747884	4	18	0.222222
EIF4E	201436_at				0.651158	0.0878802	0.025369	0.443383	0.375859	0.016749	0.88034	0.691548	0.906709	0.403631	0.385562	0.173064	0.00196925	0.264673	0.174841	0.00726145	0.457352	0.0933052	4	18	0.222222
AC004797.1	201437_s_at				0.00257809	0.274541	0.050652	0.908834	0.117572	0.0486764	0.131486	0.644386	0.539784	0.880054	0.415321	0.666972	0.0259081	0.349514	0.114429	0.00315953	0.176257	0.236127	4	18	0.222222
JUN	201465_s_at				0.000185528	0.628583	0.287944	0.121934	0.00474291	0.365302	0.656311	0.998959	0.0473552	0.443447	0.103803	0.640318	0.414142	0.791547	0.273927	0.0389816	0.261953	0.663266	4	18	0.222222
RCN2	201485_s_at				0.018737	0.702606	0.561481	0.869237	0.792935	0.165154	0.451384	0.127882	0.250516	0.72609	0.248073	0.945891	0.525544	0.12377	0.0960141	0.00871291	0.0249171	0.0184136	4	18	0.222222
CTSC	201487_at				0.503148	0.211972	0.705709	0.928912	0.1095	0.695295	0.476894	0.078978	0.706498	0.0701921	0.713647	0.0972098	0.0181861	0.879654	0.763381	0.00792873	0.00461088	0.0207659	4	18	0.222222
AC091304.2	201492_s_at				0.0746309	0.931011	0.0686361	0.193009	0.437697	0.236468	0.0302771	0.774063	0.0034618	0.436457	0.0730935	0.289511	0.000203685	0.867847	0.986505	0.0208591	0.596494	0.429511	4	18	0.222222
NFKBIA	201502_s_at				3.84e-05	0.205409	0.943548	0.540911	0.830092	0.00110874	0.248568	0.553225	0.516155	0.263997	0.967693	0.723546	0.494781	0.0402414	0.361168	0.0355832	0.533674	0.356451	4	18	0.222222
NCBP2	201517_at				0.00526866	0.208218	0.291331	0.768443	0.775725	0.0230141	0.928134	0.624052	0.591767	0.869553	0.231256	0.538938	0.0660424	0.59223	0.347565	0.00329893	0.158757	0.0117821	4	18	0.222222
SNRPN	201522_x_at				0.596805	0.713175	0.923821	0.894245	0.137819	0.583626	0.168798	0.0391408	0.0416666	0.677178	0.0324928	0.636586	0.64836	0.845942	0.420638	0.00575889	0.44696	0.0777692	4	18	0.222222
APOD	201525_at				0.454992	0.100375	0.0290531	0.669401	0.589985	0.758922	0.382571	0.457177	0.125871	0.360405	0.183583	0.193285	0.630218	0.00949848	0.0261857	0.0474288	0.433031	0.302245	4	18	0.222222
ARF5	201526_at				0.00283506	0.448557	0.146792	0.226485	0.0231561	0.0759309	0.129984	0.524482	0.146563	0.535816	0.0270419	0.223791	0.956697	0.640648	0.345763	0.0118098	0.504522	0.532576	4	18	0.222222
PSMA3	201532_at				0.135963	0.589782	0.0398474	0.117679	0.316787	0.0974283	0.400411	0.226533	0.43287	0.238557	0.0417447	0.933008	0.0132844	0.700837	0.469012	0.00820043	0.624464	0.520362	4	18	0.222222
SAR1A	201543_s_at				0.883121	0.818656	0.0175257	0.238358	0.547267	0.963905	0.448267	0.839202	0.039419	0.193894	0.0920587	0.302053	0.0412098	0.319979	0.153237	0.0386112	0.41587	0.621648	4	18	0.222222
TRIP12	201546_at				0.00261477	0.14853	0.240889	0.574825	0.502241	0.212404	0.654418	0.483991	0.406603	0.917917	0.193921	0.402055	0.0432934	0.530211	0.36892	0.0234794	0.445933	0.0121512	4	18	0.222222
LAMP1	201553_s_at				0.0382526	0.688402	0.994002	0.453595	0.707859	0.541237	0.481179	0.740648	0.2752	0.215827	0.0324115	0.0423772	0.0780047	0.927917	0.615244	0.213407	0.0130105	0.0890331	4	18	0.222222
CLIC4	201560_at				0.233699	0.0240644	0.572466	0.756578	0.81599	0.0892386	0.573635	0.479001	0.62361	0.049647	0.299854	0.0235983	0.0641472	0.498251	0.951507	0.0232491	0.661124	0.283047	4	18	0.222222
TMX4	201581_at				0.00128094	0.106079	0.264635	0.219868	0.649376	0.186527	0.388158	0.20219	0.653693	0.0743838	0.784908	0.539065	0.063816	0.0432759	0.0734792	0.000251169	0.731611	0.029358	4	18	0.222222
SEC23B	201583_s_at				0.000920615	0.895494	0.203041	0.530259	0.825385	0.946102	0.0776427	0.287754	0.835236	0.684677	0.91394	0.625746	0.95052	0.141335	0.0317089	0.0014794	0.0601788	0.0445924	4	18	0.222222
SFPQ	201585_s_at				0.000215556	0.737742	0.350751	0.99425	0.765455	0.00830847	0.0130858	0.610862	0.442201	0.493122	0.385937	0.339654	0.376678	0.97609	0.866536	0.222311	0.0387925	0.805509	4	18	0.222222
SFPQ	201586_s_at				0.000118906	0.457979	0.165779	0.82784	0.380417	0.000895592	0.164661	0.774148	0.304342	0.643482	0.337846	0.660584	0.0223061	0.920409	0.643473	0.0120998	0.102152	0.41797	4	18	0.222222
INPPL1	201598_s_at				0.00533884	0.0725171	0.234411	0.326082	0.276832	0.0335799	0.123806	0.398989	0.0578791	0.169033	0.0285682	0.0537935	0.658369	0.217913	0.326457	0.158571	0.472168	0.0400467	4	18	0.222222
PHB2	201600_at				0.0311188	0.519608	0.162994	0.993301	0.673071	0.715	0.314454	0.543416	0.179019	0.0382264	0.325083	0.152735	0.707402	0.040988	0.520856	0.00436399	0.679848	0.473925	4	18	0.222222
IER3	201631_s_at				0.610563	0.941705	0.287099	0.0314999	0.117286	0.957355	0.420343	0.529566	0.654581	0.145313	0.308847	0.880216	0.000927686	0.225434	0.211738	0.898244	0.0382171	0.00028746	4	18	0.222222
FXR1	201635_s_at				0.313627	0.407251	0.10543	0.352953	0.708026	0.492089	0.035424	0.254115	0.0367676	0.637261	0.0129044	0.422499	0.341792	0.834274	0.33023	0.0346197	0.999313	0.453428	4	18	0.222222
PACSIN2	201651_s_at				0.237713	0.413401	0.579274	0.527781	0.599537	0.156097	0.66746	0.377007	0.128819	0.199323	0.000791988	0.0105797	0.130893	0.0562926	0.047921	0.738128	0.0481728	0.374592	4	18	0.222222
ITGA6	201656_at				0.295497	0.281319	0.297993	0.599709	0.0728632	0.0783084	0.769731	0.936114	0.698095	0.262568	0.183329	0.0356315	0.0201768	0.0105936	0.00224423	0.335168	0.227892	0.488675	4	18	0.222222
MARCKS	201669_s_at				0.0240724	0.505438	0.864825	0.82765	0.152842	0.919441	0.773761	0.511486	0.0452805	0.295804	0.119565	0.523605	0.0183874	0.251763	0.684315	0.0776992	0.276552	0.030059	4	18	0.222222
USP14	201672_s_at				0.0216031	0.0385753	0.0576134	0.618494	0.358591	0.00131973	0.875785	0.157169	0.740108	0.868761	0.487644	0.418206	0.0500928	0.273533	0.380445	0.0729123	0.135096	0.0211916	4	18	0.222222
TPD52	201690_s_at				0.55819	0.085417	0.389683	0.985613	0.233356	0.0328322	0.102568	0.772425	0.0456222	0.393181	0.376383	0.732566	0.107651	0.386113	0.343606	0.00505943	0.185722	0.00949775	4	18	0.222222
SRSF4	201696_at				0.0283566	0.932856	0.686921	0.145503	0.245639	0.596476	0.805607	0.358673	0.0173603	0.100405	0.0475184	0.11401	0.725554	0.572797	0.91876	0.150729	0.0125921	0.100039	4	18	0.222222
PSMC6	201699_at				0.517437	0.199587	0.625042	0.396721	0.25653	0.0412975	0.46052	0.510538	0.0839218	0.88593	0.0388886	0.491163	0.021075	0.132746	0.324231	0.0171161	0.641009	0.544579	4	18	0.222222
LAPTM5	201721_s_at				0.044739	0.462942	0.161667	0.510714	0.459221	0.165382	0.409798	0.189236	0.117826	0.0275206	0.377371	0.135275	0.209324	0.0964278	0.282593	0.410804	0.00458512	0.000330808	4	18	0.222222
GALNT1	201722_s_at				0.017089	0.21409	0.0456958	0.162316	0.494872	0.080268	0.49586	0.60859	0.523187	0.700274	0.0961622	0.23032	0.0143745	0.986993	0.883352	0.0236556	0.304453	0.0798685	4	18	0.222222
GALNT1	201723_s_at				0.451203	0.254875	0.376811	0.405141	0.766588	0.559501	0.233438	0.492872	0.012495	0.367633	0.0283893	0.423371	0.798928	0.857777	0.900286	0.453911	0.0158338	0.0151781	4	18	0.222222
GALNT1	201724_s_at				0.152342	0.0637815	0.0137878	0.115233	0.698295	0.00111689	0.937108	0.79945	0.0980782	0.560781	0.108575	0.471795	0.353363	0.976529	0.414905	0.0412734	0.0292466	0.155622	4	18	0.222222
CLCN3	201733_at				0.784485	0.712334	0.189897	0.426495	0.317641	0.245879	0.155361	0.862286	0.0783076	0.757101	0.0333769	0.402205	0.00024997	0.0265488	0.267785	0.475078	0.320729	0.0164764	4	18	0.222222
CLCN3	201734_at				0.544151	0.878996	0.0618337	0.284128	0.110727	0.0733288	0.313743	0.796895	0.0407804	0.0324526	0.573368	0.391422	0.0260538	0.101846	0.0876464	0.00220286	0.638645	0.475334	4	18	0.222222
SGK1	201739_at				0.000259168	0.583524	0.338172	0.276711	0.595453	0.688577	0.288102	0.0147485	0.014569	0.0960989	0.190865	0.893371	0.0830228	0.320061	0.925071	0.037432	0.145315	0.479529	4	18	0.222222
TWF1	201745_at				0.0314907	0.071986	0.430998	0.926474	0.0561111	0.476895	0.44212	0.979595	0.91129	0.608238	0.278598	0.185642	0.00241451	0.240125	0.276056	0.00640269	0.397374	0.0337967	4	18	0.222222
ECE1	201749_at				0.470174	0.505549	0.401884	0.125878	0.191276	0.00710101	0.223684	0.957535	0.0240106	0.212946	0.0323861	0.794511	0.239596	0.150487	0.10897	0.00611217	0.224677	0.656503	4	18	0.222222
COX6C	201754_at				0.568098	0.618831	0.0154104	0.445141	0.955863	0.221248	0.349225	0.814678	0.098784	0.105103	0.0155706	0.0205422	0.174538	0.575049	0.318463	0.0121672	0.667368	0.939749	4	18	0.222222
TSG101	201758_at				0.00101809	0.034021	0.232102	0.668898	0.789472	0.889788	0.606872	0.311176	0.928048	0.47632	0.812093	0.830211	0.0427752	0.417613	0.485531	0.0390281	0.838707	0.9648	4	18	0.222222
WSB2	201760_s_at				0.0520703	0.0359207	0.0281461	0.593081	0.198889	0.60695	0.6686	0.304876	0.539392	0.626921	0.495654	0.228049	0.697709	0.523252	0.475658	0.00793531	0.164375	0.0321348	4	18	0.222222
HEXA	201765_s_at				0.0249113	0.245341	0.153965	0.0136282	0.971755	0.0588532	0.0636013	0.0631713	0.107536	0.265688	0.0513137	0.867391	0.694971	0.442824	0.0977012	0.0195786	0.146248	0.00797503	4	18	0.222222
CLINT1	201769_at				0.361836	0.0892804	0.0439246	0.0567349	0.0119659	0.063174	0.374256	0.663045	0.811247	0.343751	0.765501	0.351534	0.143286	0.263081	0.249525	0.00522689	0.00634491	0.114088	4	18	0.222222
ENG	201809_s_at				0.001367	0.316723	0.323412	0.179443	0.942986	0.563544	0.58963	0.269745	0.550692	0.454798	0.553388	0.422003	0.700762	0.00306772	0.0118084	0.00444208	0.786022	0.736838	4	18	0.222222
UBE3C	201817_at				0.450569	0.795545	0.211187	0.888571	0.0426173	0.19601	0.946459	0.72868	0.533188	0.792606	0.212951	0.26919	0.164834	0.934543	0.509913	0.0131647	0.0307438	0.012565	4	18	0.222222
LPCAT1	201818_at				0.951556	0.204496	0.103641	0.623366	0.5718	0.367691	0.0816704	0.764172	0.0178849	0.0222385	0.232448	0.414581	0.821199	0.747114	0.347399	0.304177	0.0151426	0.00568673	4	18	0.222222
TIMM17A	201822_at				0.0262449	0.53379	0.122491	0.222348	0.642752	0.0489065	0.665159	0.306613	0.408559	0.670438	0.632287	0.839042	0.0369087	0.894322	0.0750492	0.0248082	0.226187	0.794155	4	18	0.222222
RNF14	201824_at				0.193111	0.232503	0.548046	0.642243	0.258943	0.0118525	0.18012	0.951759	0.000703027	0.0637838	0.690692	0.335047	0.00249792	0.301729	0.141928	0.000198943	0.217992	0.0571362	4	18	0.222222
USO1	201832_s_at				0.00252388	0.193384	0.298087	0.610792	0.874581	0.00200843	0.239511	0.363852	0.339005	0.918896	0.0857688	0.358431	0.40381	0.454601	0.852628	0.00501715	0.122548	0.0124699	4	18	0.222222
SUPT7L	201837_s_at				0.0486309	0.226245	0.631411	0.787747	0.936333	0.00912432	0.837773	0.199505	0.632072	0.575544	0.849611	0.701034	0.610513	0.0884914	0.00736324	0.333621	0.259798	0.0446209	4	18	0.222222
CDC25B	201853_s_at				0.306441	0.267678	0.805789	0.852402	0.42235	0.104466	0.248688	0.183176	0.154933	0.332149	0.0970676	0.396179	0.39275	0.0396685	0.0397828	0.259631	0.00192487	0.0202784	4	18	0.222222
ZFR	201857_at				0.0413392	0.142437	0.0283627	0.686554	0.247085	0.7458	0.8587	0.42	0.757867	0.954381	0.273517	0.338734	0.0446867	0.23997	0.187167	0.00249155	0.0537273	0.170937	4	18	0.222222
SRGN	201858_s_at				0.0188241	0.533121	0.663535	0.181847	0.493428	0.704922	0.51622	0.0716569	0.167821	0.275449	0.227216	0.334017	0.0151517	0.341349	0.307812	0.727279	0.0223071	0.0045136	4	18	0.222222
SRGN	201859_at				0.582498	0.663499	0.883711	0.14134	0.95041	0.939179	0.526859	0.701424	0.104026	0.00116938	0.239343	0.00802235	0.012245	0.336125	0.899706	0.295413	0.41866	0.0244559	4	18	0.222222
TBL1X	201868_s_at				0.00436611	0.401284	0.796024	0.679291	0.501893	0.336234	0.0393607	0.0477552	0.371733	0.724428	0.020951	0.404891	0.636666	0.315838	0.131494	0.157265	0.249612	0.219136	4	18	0.222222
TBL1X	201869_s_at				8.43e-05	0.711998	0.0359573	0.75448	0.801262	0.0956929	0.146502	0.798048	0.365927	0.221187	0.0442882	0.0714029	0.227843	0.640408	0.732906	0.0673288	0.0380864	0.706645	4	18	0.222222
MPZL1	201874_at				0.0325473	0.114772	0.917861	0.931545	0.793493	0.497825	0.298938	0.238985	0.0102172	0.559391	0.0215812	0.428393	0.0354938	0.446677	0.343549	0.767353	0.35454	0.19373	4	18	0.222222
DCN	201893_x_at				0.24475	0.0657255	0.327701	0.484789	0.798805	0.020412	0.155003	0.0155589	0.185476	0.288968	0.114996	0.722212	0.247521	0.302103	0.287301	0.10843	0.021083	0.0116013	4	18	0.222222
UBE2A	201899_s_at				0.09936	0.176113	0.133265	0.295107	0.0245878	0.0551177	0.520771	0.604643	0.573329	0.91914	0.130154	0.199731	0.0151196	0.105409	0.197358	0.00339974	0.0688062	0.0167506	4	18	0.222222
GSPT1	201912_s_at				0.158581	0.219859	0.85786	0.248608	0.692264	0.00262244	0.0484777	0.803122	0.345095	0.531849	0.65174	0.588104	0.00628729	0.372428	0.806803	0.00162994	0.0645427	0.162549	4	18	0.222222
CPD	201941_at				0.00967975	0.00625764	0.0794545	0.164257	0.160242	0.979153	0.915141	0.423605	0.572088	0.635802	0.862676	0.368234	0.0210338	0.0575065	0.0530563	0.00618346	0.88783	0.187542	4	18	0.222222
HEXB	201944_at				0.586811	0.361994	0.626438	0.649067	0.184625	0.234002	0.77779	0.275002	0.100815	0.44588	0.00788346	0.62845	0.0055753	0.836071	0.726526	0.0739924	0.00444785	0.0395779	4	18	0.222222
RNF41	201961_s_at				0.00754975	0.61667	0.00662739	0.988175	0.193446	0.815037	0.164061	0.629952	0.244043	0.466693	0.128229	0.385375	0.131127	0.589688	0.261492	0.00920636	0.0403899	0.170271	4	18	0.222222
CCZ1	201974_s_at				0.725748	0.0493746	0.520826	0.30306	0.746551	0.0332362	0.369442	0.643907	0.773581	0.687668	0.53714	0.561825	0.500993	0.141747	0.00409549	0.0108948	0.363387	0.663809	4	18	0.222222
EGFR	201984_s_at				0.152525	0.865506	0.118888	0.0355432	0.462522	0.00368385	0.280713	0.436618	0.181643	0.152902	0.213653	0.00167073	0.88023	0.250564	0.985974	0.403115	0.562109	0.0294567	4	18	0.222222
ST6GAL1	201998_at				0.00555806	0.495768	0.167717	0.386241	0.921613	0.0359176	0.310593	0.994603	0.51805	0.624471	0.42977	0.652766	0.575277	0.00715041	0.00700216	0.814886	0.0722081	0.901844	4	18	0.222222
NDUFA6	202000_at				0.262137	0.062555	0.107884	0.621317	0.211748	0.193396	0.59053	0.808848	0.911805	0.40342	0.297389	0.575592	0.0340409	0.00911203	0.0206289	0.0107931	0.23721	0.508533	4	18	0.222222
TWF2	202009_at				0.411637	0.703254	0.29072	0.0316174	0.178483	0.0318321	0.146832	0.795554	0.171674	0.952738	0.0122831	0.125986	0.388163	0.337624	0.598985	0.016918	0.758858	0.672761	4	18	0.222222
LANCL1	202020_s_at				0.457383	0.345824	0.0283227	0.482222	0.149168	0.0180866	0.953315	0.242109	0.830334	0.877065	0.736638	0.675656	0.0972866	0.31679	0.265924	0.00374047	0.518904	0.0116869	4	18	0.222222
RP11-312J18.5	202043_s_at				0.000424503	0.40971	0.811214	0.717756	0.025099	0.302186	0.016614	0.612817	0.292786	0.297307	0.946686	0.104291	0.624113	0.0551812	0.261708	0.126405	0.193127	0.016729	4	18	0.222222
ALDH3A2	202054_s_at				0.0362082	0.381464	0.0606119	0.737369	0.0445417	0.32273	0.375585	0.808006	0.012985	0.109258	0.911464	0.636813	0.557969	0.0671323	0.0489091	0.324987	0.0664558	0.0515073	4	18	0.222222
KPNA1	202055_at				0.00496006	0.322206	0.150551	0.351869	0.0643531	0.470795	0.677957	0.30228	0.484537	0.858491	0.28748	0.559987	0.0960116	0.31143	0.296791	0.00345556	0.0395858	0.0193039	4	18	0.222222
SEL1L	202061_s_at				0.281517	0.246544	0.00639954	0.288439	0.065608	0.270842	0.873774	0.0671	0.611528	0.201521	0.655333	0.904504	0.0331136	0.947683	0.713205	0.000348542	0.29412	0.0220156	4	18	0.222222
SEL1L	202062_s_at				0.988756	0.690977	0.465696	0.60157	0.386988	0.0851979	0.0294595	0.685614	0.303388	0.0454962	0.196912	0.976161	0.283448	0.696923	0.159167	0.0159741	0.581858	0.0224925	4	18	0.222222
BIRC2	202076_at				0.0147305	0.0934571	0.025965	0.545854	0.175722	0.0239289	0.770443	0.375643	0.367111	0.612144	0.174493	0.327066	0.366414	0.64605	0.334031	0.0416105	0.902775	0.270802	4	18	0.222222
SLC39A6	202088_at				0.693428	0.590456	0.0663571	0.881148	0.0178562	0.00836783	0.970884	0.92995	0.654975	0.926415	0.281334	0.614827	0.0302297	0.454765	0.451113	0.0062139	0.370514	0.0969814	4	18	0.222222
PAF1	202093_s_at				0.0478804	0.178064	0.112433	0.756065	0.723337	0.0100803	0.0988528	0.189877	0.0421466	0.441019	0.165778	0.937458	0.415232	0.290231	0.553152	0.849223	0.73009	0.0207122	4	18	0.222222
DGCR2	202099_s_at				0.109253	0.441213	0.0462513	0.639953	0.0336221	0.0086156	0.464619	0.566581	0.876008	0.730126	0.681595	0.225507	0.578739	0.252765	0.225742	0.00650066	0.584529	0.2983	4	18	0.222222
PEPD	202108_at				0.0563037	0.579683	0.208617	0.1133	0.236456	0.013768	0.0990056	0.0235756	0.036503	0.0538177	0.370263	0.528703	0.439851	0.912606	0.199948	0.00931141	0.870639	0.314692	4	18	0.222222
CLK3	202140_s_at				0.00172977	0.943443	0.0985049	0.724358	0.835517	0.00674686	0.0189757	0.0323755	0.261418	0.380615	0.138496	0.107957	0.264277	0.819095	0.639021	0.469621	0.889131	0.988313	4	18	0.222222
COPS8	202141_s_at				0.0395515	0.0786	0.166614	0.637298	0.357431	0.00182573	0.856673	0.0540037	0.902771	0.587153	0.578425	0.75113	0.00703006	0.231191	0.151758	0.0271089	0.754817	0.389989	4	18	0.222222
IFRD1	202146_at				0.555156	0.173615	0.82796	0.261696	0.660017	0.887033	0.944292	0.609571	0.0560517	0.63591	0.0296635	0.354322	0.14693	0.0135839	0.0347678	0.467834	0.721286	0.0195475	4	18	0.222222
IFRD1	202147_s_at				0.645854	0.0944754	0.5807	0.117747	0.375052	0.678162	0.526654	0.840135	0.306278	0.977332	0.119836	0.630016	0.596866	0.00721492	0.000756723	0.00097999	0.408425	0.00885229	4	18	0.222222
USF2	202152_x_at				0.000979379	0.0168258	0.18583	0.100673	0.27739	0.0143658	0.146751	0.877159	0.934897	0.252829	0.839411	0.223728	0.0182305	0.979466	0.552775	0.0875501	0.489461	0.971159	4	18	0.222222
RP11-566K11.2	202154_x_at				0.0315995	0.549344	0.703751	0.175291	0.854981	0.000273443	0.846245	0.989006	0.837798	0.803923	0.773168	0.978662	0.963111	0.00983202	0.0194136	0.623183	0.315644	0.326743	4	18	0.222222
VEZF1	202171_at				0.022126	0.0737324	0.101956	0.214161	0.354577	0.647784	0.874422	0.19872	0.209405	0.716512	0.377913	0.704479	0.150665	0.203707	0.173492	0.0109846	0.0147848	0.00802979	4	18	0.222222
MVP	202180_s_at				0.00652019	0.421764	0.164488	0.29734	0.701949	0.0022737	0.139221	0.971916	0.309539	0.450065	0.833721	0.542603	0.554015	0.235166	0.0421255	0.728678	0.185561	0.0228	4	18	0.222222
KIAA0247	202181_at				0.0515494	0.967829	0.04352	0.71668	0.979566	0.330513	0.754225	0.735296	0.484477	0.993225	0.354012	0.702759	0.104756	0.0485657	0.0573523	0.235152	0.0307938	0.013703	4	18	0.222222
NUP93	202188_at				0.038495	0.426541	0.953115	0.151461	0.00312217	0.0684813	0.257366	0.153329	0.472119	0.544135	0.134266	0.132339	0.754741	0.614407	0.21856	0.0025575	0.119847	0.0383815	4	18	0.222222
CSTF1	202190_at				9.9e-05	0.408467	0.0348416	0.870608	0.05576	0.0226464	0.51686	0.291672	0.982613	0.194367	0.896659	0.306905	0.805217	0.341262	0.684672	0.00379659	0.273501	0.103558	4	18	0.222222
GAS7	202191_s_at				0.980391	0.508451	0.994952	0.961312	0.01617	0.281454	0.634569	0.786365	0.0441948	0.637028	0.128636	0.426226	0.783149	0.438522	0.984933	0.00118672	0.148495	0.0435121	4	18	0.222222
GAS7	202192_s_at				0.757069	0.497137	0.350502	0.659248	0.191895	0.206085	0.0440938	0.712616	0.246044	0.37083	0.510729	0.283989	0.481316	0.0178215	0.0323067	0.0417497	0.13353	0.971962	4	18	0.222222
TMED5	202195_s_at				0.505535	0.160197	0.413002	0.864911	0.290587	0.432436	0.172605	0.356224	0.808501	0.0838332	0.0893897	0.767254	0.0107581	0.259426	0.67628	0.0296457	0.0264751	0.00736305	4	18	0.222222
CUL4B	202214_s_at				0.131867	0.228768	0.0743609	0.181307	0.651317	0.0583013	0.52587	0.320349	0.77921	0.190356	0.775366	0.574482	0.0323762	0.048076	0.0363821	0.0064533	0.957122	0.204957	4	18	0.222222
SLC6A8	202219_at				0.50499	0.741905	0.0781046	0.796139	0.113368	0.52494	0.593491	0.236619	0.016163	0.0770347	0.010609	0.0545961	0.245066	0.646105	0.568152	0.00845722	0.289057	0.012338	4	18	0.222222
CRK	202224_at				0.00528126	0.508525	0.0367357	0.147788	0.966106	0.338302	0.0613792	0.107569	0.000743925	0.954413	0.103647	0.861485	0.757218	0.805513	0.518005	0.0155422	0.732464	0.338878	4	18	0.222222
NPTN	202228_s_at				0.0502956	0.0800371	0.0285411	0.359476	0.138064	0.729782	0.580875	0.431414	0.633187	0.378265	0.399402	0.239147	0.00232546	0.455072	0.480883	0.00115472	0.377727	0.0136364	4	18	0.222222
EIF3M	202231_at				0.114003	0.295738	0.387604	0.301332	0.502206	0.0133107	0.122126	0.989708	0.318518	0.834783	0.0328306	0.190304	0.000274781	0.0136255	0.130376	0.331509	0.128538	0.102139	4	18	0.222222
EIF3M	202232_s_at				0.0182353	0.116145	0.265996	0.263949	0.989778	0.325036	0.226372	0.652944	0.77946	0.627098	0.153591	0.185935	0.0173116	0.030252	0.102472	0.0119752	0.258959	0.985318	4	18	0.222222
SLC16A1	202234_s_at				0.634015	0.692364	0.0409077	0.0981091	0.640786	0.253389	0.96582	0.908433	0.426347	0.766048	0.524335	0.30193	0.379352	0.0397082	0.0261504	0.00179419	0.813734	0.973096	4	18	0.222222
PARP4	202239_at				0.00190638	0.653711	0.0566124	0.655759	0.260623	0.680383	0.823962	0.193261	0.324136	0.845163	0.715761	0.624512	0.914656	0.0384286	0.370633	0.0218331	0.420872	0.0328148	4	18	0.222222
CD2BP2	202257_s_at				0.209171	0.716735	0.0036855	0.544399	0.475361	0.1266	0.292642	0.583583	0.76542	0.224268	0.976821	0.259796	0.826122	0.0261885	0.0475398	0.00926456	0.570519	0.205301	4	18	0.222222
STXBP1	202260_s_at				0.231688	0.864649	0.867294	0.0312625	0.985483	0.882926	0.961747	0.992995	0.898261	0.228189	0.79589	0.342237	0.0138386	0.522695	0.189466	0.0108093	0.0120323	0.067824	4	18	0.222222
DDAH2	202262_x_at				0.060427	0.188782	0.15953	0.115549	0.262676	0.0286656	0.278564	0.505301	0.0257246	0.592886	0.00241206	0.1985	0.610396	0.116191	0.147369	0.277363	0.403329	0.0294309	4	18	0.222222
ACTG2	202274_at				0.221602	0.302751	0.431294	0.890313	0.844491	0.00352941	0.637819	0.49299	0.265081	0.740684	0.692273	0.814976	0.316526	0.0088149	0.0108232	0.028778	0.106312	0.195439	4	18	0.222222
SPTLC1	202277_at				0.881148	0.443423	0.0413552	0.091453	0.141884	0.000608967	0.150478	0.673451	0.755589	0.97264	0.95741	0.93355	0.0172883	0.292035	0.159512	0.0170776	0.63122	0.205887	4	18	0.222222
MGP	202291_s_at				0.864441	0.468146	0.0442823	0.265425	0.386816	0.169389	0.911967	0.603561	0.847982	0.324101	0.28098	0.894159	0.683104	0.066654	0.0401695	0.703498	0.00683102	0.00324315	4	18	0.222222
STAG1	202294_at				0.00443296	0.538679	0.0197487	0.232534	0.969459	0.0717821	0.283056	0.590227	0.353812	0.537767	0.864197	0.11917	0.0160979	0.949693	0.639405	0.0029655	0.937259	0.236791	4	18	0.222222
HBXIP	202300_at				0.020005	0.388284	0.0130034	0.828489	0.395224	0.571558	0.958007	0.25768	0.906919	0.298074	0.531601	0.916055	0.0181353	0.974602	0.841589	0.0046345	0.905247	0.892787	4	18	0.222222
GGPS1	202321_at				0.001488	0.510644	0.506579	0.346329	0.0161907	0.041992	0.40396	0.801886	0.748044	0.6204	0.158774	0.972258	0.477886	0.235099	0.262668	0.424026	0.340981	0.0367756	4	18	0.222222
ACBD3	202324_s_at				0.344869	0.174198	0.119147	0.470819	0.553527	0.0249055	0.172065	0.481382	0.622251	0.832275	0.380488	0.984351	0.0316751	0.400865	0.129482	0.0140015	0.891765	0.020412	4	18	0.222222
PMF1	202337_at				0.019581	0.179616	0.869094	0.63161	0.637042	0.00986808	0.421166	0.830534	0.0417156	0.880007	0.277089	0.651536	0.572198	0.743716	0.252934	0.00169112	0.759464	0.158455	4	18	0.222222
MIR4700	202365_at				0.145976	0.98161	0.378454	0.115275	0.0148141	0.0393514	0.560989	0.249117	0.992696	0.41762	0.802543	0.565343	0.256532	0.439823	0.67272	0.000503964	0.285443	0.0273725	4	18	0.222222
TCEAL4	202371_at				0.0103389	0.804048	0.137081	0.0524847	0.227177	0.233568	0.228624	0.807512	0.617413	0.809026	0.0928186	0.385597	0.0519976	0.0962187	0.0401693	0.0349701	0.0159808	0.0755816	4	18	0.222222
RGS2	202388_at				1.98e-05	0.661369	0.215754	0.242764	0.803328	0.699309	0.869219	0.708257	0.0364403	0.00934079	0.252518	0.113428	0.0025356	0.0985849	0.887239	0.083534	0.451657	0.937671	4	18	0.222222
BASP1	202391_at				0.0196908	0.400066	0.761067	0.0864678	0.187868	0.0401613	0.206687	0.0839909	0.82217	0.320761	0.890923	0.274708	0.116608	0.350819	0.463378	0.606642	0.0304525	0.0152299	4	18	0.222222
TIAL1	202405_at				0.0423719	0.249751	0.438878	0.599715	0.375603	0.608967	0.423286	0.318809	0.81832	0.351626	0.485385	0.160444	0.101403	0.032195	0.0462156	0.0023919	0.991757	0.0605885	4	18	0.222222
IGF2	202410_x_at				0.434398	0.0317636	0.0237057	0.498661	0.000725582	0.639538	0.531609	0.560627	0.67109	0.124821	0.131011	0.0539684	0.957349	0.445586	0.229378	0.314874	0.564678	0.0445283	4	18	0.222222
USP1	202413_s_at				0.0318899	0.130811	0.35006	0.304623	0.523379	0.000864581	0.236426	0.38642	0.567378	0.508086	0.869511	0.886564	0.00829637	0.311223	0.240331	0.000113857	0.952529	0.249143	4	18	0.222222
CYP1B1	202435_s_at				0.0105191	0.0539237	0.685082	0.931717	0.0615287	0.0769302	0.913657	0.472937	0.102447	0.343474	0.0230611	0.13302	0.00295234	0.751678	0.729028	0.598189	0.0579815	0.0373277	4	18	0.222222
CYP1B1	202437_s_at				0.026393	0.139209	0.254867	0.734923	0.830445	0.175276	0.521708	0.833466	0.321751	0.813998	0.0432314	0.193598	0.000704514	0.148205	0.272493	0.178169	0.264681	0.00423522	4	18	0.222222
NOTCH2	202445_s_at				0.890103	0.00772641	0.528005	0.713819	0.103604	0.4765	0.177894	0.836874	0.432941	0.88439	0.30575	0.393802	0.00192625	0.335263	0.312302	0.0439461	0.606268	0.0148612	4	18	0.222222
CTSK	202450_s_at				0.600351	0.175301	0.0821213	0.671946	0.620458	0.869868	0.200549	0.00625803	0.00492034	0.54934	0.0285246	0.846002	0.347289	0.347508	0.607478	0.283768	0.274642	0.00725378	4	18	0.222222
GTF2H1	202453_s_at				0.00136014	0.191104	0.105906	0.476969	0.857162	0.20732	0.502242	0.232963	0.725651	0.0218839	0.941798	0.0312532	0.910817	0.785311	0.630134	0.00366165	0.865878	0.141277	4	18	0.222222
PRSS23	202458_at				0.747836	0.687613	0.792997	0.605749	0.724595	0.731702	0.52872	0.783933	0.730811	0.576792	0.593615	0.623671	0.0255066	0.0928707	0.0360215	0.0320123	0.103461	0.0129461	4	18	0.222222
DDX46	202462_s_at				0.635974	0.041703	0.285328	0.911092	0.48107	0.00643237	0.880271	0.196018	0.713822	0.581156	0.0510382	0.281029	0.997511	0.987265	0.714187	0.000640701	0.978429	0.0390382	4	18	0.222222
IDH3G	202471_s_at				0.0156223	0.632483	0.254633	0.620132	0.375419	0.00479683	0.140185	0.0149505	0.751511	0.369167	0.0665395	0.852989	0.321785	0.87301	0.519309	0.00539431	0.97884	0.893013	4	18	0.222222
TUBGCP2	202476_s_at				0.0417204	0.912583	0.0359119	0.628622	0.355361	0.0699903	0.00979631	0.192874	0.23669	0.917279	0.227703	0.524387	0.730332	0.204743	0.358109	0.0151102	0.489135	0.783698	4	18	0.222222
MBD2	202484_s_at				0.0375768	0.186985	0.597671	0.0336786	0.255515	0.225497	0.354078	0.533246	0.24905	0.370298	0.254982	0.349301	0.166174	0.310556	0.251929	0.0412379	0.207056	0.00467055	4	18	0.222222
IKBKAP	202491_s_at				0.0268138	0.847499	0.0918381	0.0610026	0.236753	0.00646094	0.390143	0.956448	0.104428	0.434452	0.461427	0.796422	0.953397	0.028056	0.0720779	0.00413744	0.179035	0.0783456	4	18	0.222222
TRIM29	202504_at				0.684141	0.307312	0.257683	0.0104812	0.834412	0.519401	0.735407	0.491879	0.203065	0.0238862	0.0859739	0.0651093	0.0731787	0.030372	0.0104994	0.304152	0.944279	0.381496	4	18	0.222222
DLG1	202514_at				0.432359	0.402754	0.0298446	0.215244	0.0563779	0.032555	0.775648	0.267579	0.207572	0.265415	0.702741	0.838932	0.209889	0.508075	0.42698	0.0115185	0.625945	0.00467942	4	18	0.222222
SMAD4	202526_at				0.198276	0.207542	0.018944	0.61926	0.0467901	0.765828	0.422268	0.385189	0.053962	0.428087	0.0514386	0.0474261	0.00450895	0.0941898	0.329306	0.191653	0.663782	0.998187	4	18	0.222222
HMGCR	202539_s_at				0.00474384	0.0423806	0.414239	0.97247	0.0994664	0.26541	0.269986	0.708013	0.779727	0.467816	0.643999	0.700871	0.00058171	0.300909	0.191617	0.00663545	0.113401	0.794466	4	18	0.222222
GMFB	202543_s_at				0.00682788	0.0497881	0.348782	0.487958	0.452802	0.600942	0.903048	0.374816	0.615051	0.995552	0.481328	0.494768	0.0225936	0.169255	0.580549	0.00430357	0.516355	0.094628	4	18	0.222222
GMFB	202544_at				0.0249492	0.266248	0.0511709	0.700078	0.851492	0.228828	0.357942	0.393654	0.11826	0.444249	0.627197	0.930047	0.000676253	0.379851	0.11025	0.00220619	0.183327	0.035451	4	18	0.222222
GSTM3	202554_s_at				0.00772151	0.745678	0.381112	0.116194	0.96038	0.124429	0.168086	0.886821	0.633386	0.944235	0.0446911	0.00525936	0.76179	0.720601	0.711917	0.0137706	0.364966	0.320938	4	18	0.222222
HSPA13	202557_at				0.00024585	0.0510686	0.789862	0.677614	0.319749	0.00930532	0.786189	0.993912	0.888351	0.825325	0.249466	0.626202	0.0444436	0.844909	0.480058	0.0089211	0.18214	0.16423	4	18	0.222222
TNKS	202561_at				0.00503461	0.112088	0.0280594	0.0593708	0.375924	0.0428278	0.112089	0.974773	0.558397	0.258747	0.568154	0.96494	0.798939	0.31379	0.430434	0.0180194	0.307844	0.152	4	18	0.222222
CSNK1G2	202574_s_at				4.86e-06	0.310009	0.0396627	0.817859	0.0201	0.0680005	0.00744441	0.145845	0.0891879	0.1504	0.206722	0.341038	0.489078	0.979601	0.872597	0.053154	0.209693	0.708	4	18	0.222222
DDX19A	202578_s_at				0.975101	0.817286	0.0405878	0.794076	0.753742	0.367055	0.0432073	0.0444212	0.242926	0.835099	0.284117	0.95567	0.0410228	0.297167	0.450343	0.207928	0.368666	0.376368	4	18	0.222222
HTATSF1	202602_s_at				0.23401	0.293891	0.0186882	0.741129	0.20859	0.0244297	0.93323	0.269608	0.777899	0.675407	0.124946	0.205003	0.00810556	0.627782	0.46353	0.199747	0.686937	0.0249526	4	18	0.222222
ADAM10	202603_at				0.283098	0.209092	0.10257	0.683259	0.0426982	0.0543976	0.5572	0.643613	0.95541	0.580006	0.0768375	0.466972	0.0105026	0.553053	0.609882	0.0204713	0.104069	0.0292846	4	18	0.222222
CTPS1	202613_at				0.249576	0.696144	0.158683	0.924969	0.802079	0.000891551	0.352599	0.558285	0.50414	0.450789	0.452286	0.814701	0.660741	0.754468	0.704131	0.0204847	0.0126528	0.0379905	4	18	0.222222
SLC30A9	202614_at				0.418039	0.0335443	0.616607	0.142575	0.341109	0.0195395	0.639658	0.928652	0.291005	0.178148	0.139566	0.0812262	0.148335	0.221298	0.0291046	0.00334313	0.389059	0.288161	4	18	0.222222
IRF3	202621_at				0.0499936	0.372747	0.360308	0.672296	0.449642	0.0227876	0.587286	0.201717	0.105101	0.593149	0.0276402	0.141568	0.35502	0.0637954	0.0984176	0.0343328	0.533307	0.199987	4	18	0.222222
TOPBP1	202633_at				0.703957	0.272604	0.0495108	0.532957	0.273179	0.171421	0.861416	0.326726	0.0157028	0.13431	0.97311	0.789932	0.255852	0.459576	0.280605	0.0170364	0.534384	0.0244378	4	18	0.222222
CSDE1	202646_s_at				0.0488679	0.126529	0.239758	0.929615	0.364144	0.568794	0.469707	0.114766	0.000656415	0.523433	0.000694792	0.123924	0.901911	0.40095	0.668225	0.677845	0.125765	0.0219828	4	18	0.222222
MANF	202655_at				0.0624651	0.519562	0.147511	0.21733	0.97136	0.00383733	0.818185	0.095936	0.0971917	0.1122	0.00211383	0.00385946	0.0630306	0.132477	0.364191	0.00100657	0.0621232	0.186765	4	18	0.222222
PEX11B	202658_at				0.273803	0.991235	0.0500889	0.192937	0.0328772	0.0943647	0.118724	0.930742	0.871993	0.169728	0.246586	0.807081	0.0148876	0.0890202	0.090781	0.00082123	0.717805	0.0100449	4	18	0.222222
WIPF1	202664_at				0.21171	0.191838	0.191362	0.252953	0.159546	0.0302028	0.992353	0.986086	0.0616348	0.0172635	0.12327	0.058839	0.0355329	0.710226	0.510412	0.693831	0.0520819	0.00310173	4	18	0.222222
ACTL6A	202666_s_at				0.490647	0.7053	0.103944	0.210054	0.240497	0.0147409	0.180885	0.661852	0.00393268	0.0559064	0.228118	0.53422	0.00985735	0.159077	0.0953214	0.0222466	0.980901	0.3476	4	18	0.222222
EFNB2	202669_s_at				0.388049	0.682217	0.866655	0.0195092	0.0122438	0.202948	0.572152	0.614994	0.00632001	0.177108	0.0205136	0.280867	0.652018	0.556333	0.485101	0.0725785	0.510435	0.252973	4	18	0.222222
FASTK	202676_x_at				0.00318324	0.0754655	0.203703	0.61813	0.846501	0.099101	0.00680337	0.259745	0.00502481	0.110326	0.211607	0.365006	0.0376858	0.142106	0.314797	0.0926419	0.285403	0.300236	4	18	0.222222
GTF2E2	202680_at				0.668296	0.494189	0.045664	0.836913	0.0149202	0.0241466	0.576845	0.873216	0.297326	0.620712	0.668405	0.802138	0.510892	0.662292	0.868393	0.0176395	0.18508	0.449618	4	18	0.222222
BMP1	202701_at				0.243526	0.594264	0.149532	0.778838	0.0396055	0.457597	0.932583	0.272818	0.327236	0.0918751	0.538362	0.0400008	0.0797689	0.109823	0.969596	0.00370395	0.400005	0.0249503	4	18	0.222222
BET1	202710_at				0.000118859	0.218785	0.0551657	0.0320709	0.315747	0.118524	0.934937	0.435089	0.950686	0.262269	0.900412	0.688588	0.0246624	0.313952	0.0652378	0.000318945	0.677276	0.56454	4	18	0.222222
KIAA0391	202713_s_at				0.193765	0.156578	0.0132058	0.685656	0.515019	0.253859	0.945272	0.415915	0.00101057	0.0647937	0.261872	0.964756	0.0133615	0.142459	0.0263268	0.149421	0.673519	0.354769	4	18	0.222222
TRIP10	202734_at				0.00834448	0.311541	0.578367	0.131215	0.687257	0.0191043	0.824561	0.80421	0.525922	0.485143	0.417709	0.597623	0.93227	0.033529	0.183279	0.018423	0.378561	0.19705	4	18	0.222222
USP8	202745_at				0.810977	0.0404005	0.855015	0.738172	0.700196	0.00455727	0.151542	0.902704	0.551511	0.927275	0.161375	0.489555	0.0133963	0.226508	0.294446	0.0286933	0.584001	0.669986	4	18	0.222222
ITM2A	202746_at				0.0629716	0.0920783	0.441041	0.634044	0.849408	0.04297	0.385191	0.872425	0.845898	0.527135	0.571798	0.304214	0.00674901	0.241562	0.0236957	0.0936757	0.18552	0.0392114	4	18	0.222222
STIM1	202764_at				0.00181578	0.55486	0.959842	0.138144	0.00555259	0.88447	0.0339374	0.0966529	0.876672	0.378294	0.733764	0.842858	0.94949	0.911856	0.624439	0.249982	0.891581	0.00652614	4	18	0.222222
FBN1	202765_s_at				0.253037	0.893939	0.425202	0.503717	0.358457	0.644903	0.0124783	0.0277376	0.0900644	0.740002	0.275768	0.969175	0.347519	0.499111	0.2187	0.0200277	0.247869	0.00644951	4	18	0.222222
ZMYM2	202778_s_at				0.382423	0.302599	0.186283	0.921155	0.343357	0.071045	0.652171	0.750867	0.0119961	0.225035	0.0162791	0.13126	0.0228974	0.452929	0.368908	0.148877	0.678194	0.0417088	4	18	0.222222
SEC24B	202798_at				0.481163	0.0162087	0.535776	0.252751	0.58912	0.0669589	0.588835	0.356879	0.449962	0.0208585	0.75519	0.34302	0.25268	0.287121	0.146106	0.00293188	0.952316	0.00288673	4	18	0.222222
ITGB2	202803_s_at				0.640814	0.383832	0.185612	0.528422	0.339919	0.00147165	0.0618002	0.0619827	0.0114078	0.231184	0.337678	0.665969	0.260144	0.0810753	0.220051	0.157367	0.00061942	0.000809025	4	18	0.222222
ABCC1	202804_at				0.00111115	0.332319	0.27968	0.280888	0.382629	0.00180023	0.216682	0.670007	0.745072	0.0762988	0.013838	0.891522	0.281287	0.11495	0.25324	0.939018	0.0010608	0.0789463	4	18	0.222222
TOM1	202807_s_at				0.0092966	0.596229	0.219627	0.361597	0.00541838	0.0489871	0.532524	0.159496	0.642724	0.0947148	0.250171	0.700723	0.211967	0.175496	0.0757731	0.327648	0.984676	0.0177075	4	18	0.222222
HEXIM1	202815_s_at				0.00106715	0.739021	0.0746175	0.426974	0.745163	0.55914	0.740409	0.149193	0.0444423	0.179987	0.107492	0.271129	0.018539	0.0875167	0.200541	0.332921	0.00390972	0.809146	4	18	0.222222
AHR	202820_at				0.733678	0.497648	0.804682	0.0399894	0.772699	0.65294	0.469374	0.272517	0.415047	0.0236721	0.72551	0.0704317	0.0319241	0.775517	0.629362	0.612138	0.126452	0.00969937	4	18	0.222222
VAMP7	202829_s_at				0.841858	0.0761799	0.288328	0.997718	0.0341032	0.0747311	0.687224	0.25773	0.383349	0.465909	0.673559	0.999452	0.0350216	0.20281	0.316168	0.00320229	0.0919641	0.033141	4	18	0.222222
RALBP1	202844_s_at				0.251838	0.981622	0.00811826	0.334576	0.0207678	0.489358	0.00096441	0.173323	0.14597	0.274137	0.0687694	0.238867	0.0457348	0.860051	0.751598	0.490889	0.596398	0.300168	4	18	0.222222
ATP6V1C1	202872_at				0.0705691	0.0518104	0.112131	0.247448	0.271364	0.0419202	0.994463	0.661938	0.076761	0.0772339	0.736276	0.310027	0.00370446	0.106508	0.0488204	0.0202169	0.963079	0.342245	4	18	0.222222
ATP6V1C1	202874_s_at				0.0349984	0.13061	0.164415	0.3388	0.187131	0.181962	0.77022	0.258751	0.103448	0.0145943	0.846435	0.585265	0.0486445	0.466541	0.562984	0.0137105	0.958593	0.111036	4	18	0.222222
PPP2R1B	202883_s_at				0.382001	0.908087	0.492237	0.477808	0.0409373	0.0265776	0.678362	0.880395	0.743783	0.784087	0.569562	0.267401	0.505076	0.140481	0.573692	0.00704906	0.340605	0.0445814	4	18	0.222222
EPHB4	202894_at				0.295079	0.166425	0.30237	0.580716	0.313966	0.22205	0.788953	0.458094	0.885664	0.000675511	0.828593	0.014742	0.0284881	0.544832	0.534739	0.0127334	0.70128	0.366548	4	18	0.222222
FAM20B	202915_s_at				0.385553	0.111242	0.035311	0.0802293	0.253088	0.138274	0.924689	0.551102	0.105697	0.189401	0.0131072	0.0396006	0.613179	0.379553	0.397703	0.0797507	0.133006	0.0303252	4	18	0.222222
S100A8	202917_s_at				0.329436	0.0710534	0.249708	0.0399063	0.300266	0.00245838	0.644217	0.158143	0.20675	0.156199	0.173929	0.104022	0.00359578	0.00476886	0.203602	0.290322	0.183231	0.61303	4	18	0.222222
ANK2	202921_s_at				0.84878	0.435068	0.366596	0.891311	0.164955	0.492171	0.576754	0.486939	0.714852	0.0191233	0.915	0.0110658	0.503045	0.839254	0.963423	0.0289657	0.0370611	0.0536635	4	18	0.222222
ZMPSTE24	202939_at				0.9489	0.137394	0.0275997	0.767425	0.332462	0.0135969	0.950896	0.393706	0.697839	0.190451	0.0888681	0.350339	0.0208474	0.316279	0.524469	0.0499074	0.355119	0.731832	4	18	0.222222
GYPC	202947_s_at				0.118546	0.745679	0.344626	0.266325	0.705724	0.265268	0.342019	0.927092	0.0364365	0.189081	0.153665	0.385946	0.286824	0.0693884	0.0271552	0.0189947	0.280885	0.0293598	4	18	0.222222
MUT	202959_at				0.0170333	0.138089	0.199956	0.0487413	0.318812	0.0462496	0.854164	0.738205	0.286607	0.320238	0.979755	0.856647	0.0238148	0.108046	0.14967	0.160683	0.167559	0.782806	4	18	0.222222
MUT	202960_s_at				0.00579285	0.320495	0.137821	0.146949	0.0730397	0.18923	0.962281	0.224311	0.224268	0.486451	0.958081	0.989474	0.054384	0.0532592	0.0427842	0.0428798	0.0184337	0.354404	4	18	0.222222
RFX5	202963_at				0.906111	0.698394	0.0171617	0.0985586	0.552762	0.0621642	0.00975407	0.027875	0.843278	0.716014	0.476476	0.978248	0.171391	0.822013	0.486888	0.00719257	0.194636	0.123623	4	18	0.222222
GSTA4	202967_at				0.159383	0.372637	0.0415276	0.995852	0.579546	0.0982466	0.474235	0.651784	0.0801035	0.357367	0.484188	0.786421	0.675008	0.257447	0.235387	0.00592423	0.0400123	0.043989	4	18	0.222222
DYRK2	202969_at				0.357551	0.226468	0.192699	0.71276	0.936758	0.0173553	0.476483	0.402852	0.803776	0.854915	0.548921	0.831968	0.0102226	0.227421	0.209878	0.00575438	0.388028	0.049207	4	18	0.222222
DYRK2	202971_s_at				0.249746	0.636362	0.19262	0.909465	0.0701564	0.00610132	0.540886	0.676707	0.28497	0.857631	0.208179	0.50195	0.0141494	0.124766	0.423376	0.0648191	0.0228117	0.000142932	4	18	0.222222
CREBZF	202978_s_at				0.002281	0.514528	0.929518	0.25604	0.803277	0.221843	0.0301038	0.671917	0.15085	0.953233	0.405797	0.573906	0.831233	0.298883	0.5497	0.0351471	0.0195729	0.0869886	4	18	0.222222
SIAH1	202981_x_at				0.653022	0.0246796	0.301684	0.622006	0.825103	0.18306	0.259167	0.895582	0.181712	0.761902	0.64099	0.657192	0.0379442	0.580831	0.458669	0.0246516	0.497675	0.00709258	4	18	0.222222
MEF2D	203004_s_at				0.0478284	0.287907	0.408279	0.283517	0.540847	0.0189908	0.243259	0.114447	0.107727	0.0147308	0.110801	0.0827189	0.522157	0.616738	0.25444	0.0100067	0.551774	0.336738	4	18	0.222222
SSX2IP	203019_x_at				0.0181316	0.265272	0.07185	0.0413336	0.797384	0.338932	0.955364	0.733467	0.0327629	0.971002	0.922064	0.315164	0.698591	0.336064	0.725078	0.0176568	0.0946481	0.521526	4	18	0.222222
RABGAP1L	203020_at				0.00374724	0.705032	0.0308864	0.376642	0.526993	0.850602	0.375324	0.805035	0.25254	0.65955	0.453	0.571276	0.00519833	0.957393	0.576549	0.528528	0.224149	0.0396977	4	18	0.222222
UROS	203031_s_at				0.0132557	0.288915	0.615328	0.335666	0.226108	0.233378	0.575056	0.553635	0.0424562	0.286802	0.0296264	0.156266	0.233714	0.730543	0.977993	0.174715	0.30533	0.0469777	4	18	0.222222
FH	203033_x_at				0.398995	0.216944	0.711364	0.872619	0.874893	0.0127763	0.30642	0.337269	0.833203	0.873536	0.498146	0.321755	0.222298	0.132957	0.0453581	0.0257721	0.344076	0.0270311	4	18	0.222222
NDUFS1	203039_s_at				0.0608672	0.0665505	0.00898834	0.58097	0.85103	0.0703188	0.588021	0.336887	0.394073	0.494013	0.477819	0.0689025	0.178475	0.0340759	0.0486533	0.0250783	0.643731	0.254663	4	18	0.222222
LAMP2	203041_s_at				0.157023	0.591868	0.994014	0.386858	0.0418274	0.258388	0.534302	0.380118	0.706488	0.100976	0.467613	0.15217	0.0989383	0.520323	0.637843	0.00316203	0.00733108	0.006339	4	18	0.222222
C2	203052_at				0.567877	0.447875	0.329793	0.884083	0.453494	0.559937	0.784409	0.0975343	0.0129011	0.368908	0.639589	0.432242	0.247677	0.0954209	0.254944	0.00694848	0.0194615	0.000612761	4	18	0.222222
BCAS2	203053_at				0.023913	0.100448	0.146377	0.341255	0.464842	0.147027	0.479478	0.32917	0.0423032	0.562158	0.225903	0.776847	0.0223115	0.826216	0.603533	0.00544477	0.637984	0.991262	4	18	0.222222
CHST15	203066_at				0.00161357	0.0319363	0.0552032	0.701698	0.662447	0.216301	0.43797	0.811495	0.0800166	0.407268	0.354107	0.924172	0.4186	0.392031	0.6092	0.632245	0.00677406	0.00394773	4	18	0.222222
TGFB1	203085_s_at				0.00027771	0.441289	0.139073	0.958456	0.800253	0.000389191	0.00630338	0.00402777	0.836944	0.934558	0.643713	0.894942	0.383683	0.132601	0.0696505	0.0579964	0.933452	0.0969983	4	18	0.222222
FBLN5	203088_at				0.392986	0.587028	0.130327	0.468783	0.294509	0.0498281	0.84358	0.0639775	0.176726	0.694585	0.545662	0.329799	0.0996798	0.13588	0.0334984	0.605104	0.0242974	0.00467032	4	18	0.222222
MGAT2	203102_s_at				0.0549588	0.801184	0.491283	0.673652	0.061775	0.0258441	0.0954543	0.934586	0.9902	0.849766	0.227315	0.495595	0.0332201	0.406891	0.836107	0.000371697	0.048631	0.120871	4	18	0.222222
DNM1L	203105_s_at				0.00515855	0.120047	0.181919	0.712476	0.504573	0.00688475	0.391785	0.213774	0.621166	0.497457	0.312124	0.235457	0.145254	0.112427	0.117518	0.00567092	0.0141677	0.156605	4	18	0.222222
EEF1D	203113_s_at				0.00230114	0.469985	0.223064	0.337883	0.13897	0.0165154	0.588868	0.542822	0.00635857	0.361281	0.0173256	0.291941	0.196947	0.571354	0.109037	0.945086	0.769784	0.725228	4	18	0.222222
FECH	203116_s_at				0.21802	0.50988	0.500696	0.208482	0.0340653	0.000701572	0.959745	0.219397	0.100809	0.0979548	0.437349	0.408625	0.356982	0.075781	0.0994479	0.0187913	0.663367	0.02827	4	18	0.222222
SLC11A2	203124_s_at				0.684124	0.262685	0.122587	0.37771	0.162074	0.453433	0.893547	0.879705	0.640314	0.941998	0.112688	0.434056	0.00509055	0.591543	0.633324	0.016143	0.0307488	0.00814296	4	18	0.222222
SPTLC2	203127_s_at				0.786002	0.73112	0.343545	0.145966	0.921504	0.00585456	0.423708	0.683199	0.409599	0.0313882	0.867727	0.154209	0.0140513	0.318767	0.590469	0.695932	0.147449	0.0313963	4	18	0.222222
KIF5C	203130_s_at				0.837928	0.82001	0.731662	0.107842	0.199187	0.0733181	0.7321	0.951782	0.00969383	0.343757	0.00345033	0.42194	0.377197	0.910719	0.711909	0.00649211	0.204393	0.0152482	4	18	0.222222
AP3B1	203142_s_at				9.68e-05	0.711047	0.0739884	0.201714	0.124328	0.159511	0.483534	0.114288	0.0914629	0.0346972	0.719806	0.530005	0.66417	0.989212	0.842014	0.00452623	0.428943	0.01304	4	18	0.222222
KIAA0040	203143_s_at				5.14e-05	0.577402	0.0982535	0.191878	0.516229	0.805951	0.272349	0.72702	0.315212	0.603134	0.039529	0.265651	0.886682	0.0491795	0.00987235	0.729651	0.170915	0.338394	4	18	0.222222
TRIM14	203148_s_at				0.141904	0.0359646	0.819357	0.918329	0.689444	0.250023	0.455524	0.350058	0.336871	0.020246	0.591013	0.113181	0.310124	0.0706524	0.224344	0.672816	0.00448587	0.00667456	4	18	0.222222
AKAP11	203156_at				0.117026	0.614202	0.0436552	0.117515	0.0470169	0.0130492	0.647348	0.80985	0.15528	0.153843	0.700113	0.113343	0.0626826	0.266358	0.364154	0.000547421	0.603341	0.136731	4	18	0.222222
GLS	203157_s_at				0.000852827	0.724496	0.106703	0.190879	0.976472	0.770383	0.292656	0.539768	0.263177	0.568582	0.398096	0.686681	0.670021	0.562551	0.0364646	0.391099	0.00597597	0.0308437	4	18	0.222222
GLS	203159_at				0.00456723	0.953614	0.138215	0.162075	0.812918	0.108118	0.772258	0.887436	0.900753	0.485234	0.74285	0.635943	0.0272529	0.272983	0.382656	0.105989	0.000765986	0.0143348	4	18	0.222222
KATNB1	203163_at				0.0129207	0.673578	0.376869	0.420624	0.338475	0.00658706	0.378913	0.00674401	0.221472	0.685026	0.647338	0.151292	0.22409	0.34402	0.47269	0.0119349	0.873416	0.292562	4	18	0.222222
CFDP1	203166_at				0.0288083	0.0892974	0.00897388	0.243313	0.0481745	0.108493	0.120158	0.57191	0.566054	0.312262	0.137207	0.819008	0.00670721	0.565838	0.192487	0.905304	0.63193	0.412472	4	18	0.222222
RHOG	203175_at				0.0392453	0.561236	0.736506	0.076729	0.494031	0.000539288	0.300404	0.276363	0.550659	0.333513	0.449955	0.779586	0.0818381	0.268996	0.774844	0.00941974	0.185906	0.00207939	4	18	0.222222
GATM	203178_at				0.0280237	0.327106	0.328442	0.598087	0.847477	0.0272998	0.37741	0.981536	0.33401	0.483841	0.257755	0.302382	0.0184262	0.493883	0.860618	0.925215	0.331011	0.0479807	4	18	0.222222
ALDH1A3	203180_at				0.128691	0.533421	0.542238	0.414174	0.225915	0.393038	0.855215	0.564432	0.0286579	0.547322	0.0273754	0.668789	0.0722008	0.982891	0.180654	0.30432	0.012668	0.0177968	4	18	0.222222
SRPK2	203181_x_at				0.001741	0.645735	0.218064	0.376038	0.0594348	0.118328	0.00158123	0.0982149	0.0369969	0.420818	0.00119257	0.0641614	0.920426	0.766587	0.631147	0.884499	0.417442	0.166066	4	18	0.222222
S100A4	203186_s_at				0.535834	0.530834	0.546335	0.36631	0.41412	0.00237816	0.6001	0.305398	0.00222003	0.196259	0.00988025	0.1823	0.520794	0.344522	0.17028	0.0263005	0.130653	0.129221	4	18	0.222222
NUP98	203194_s_at				3.59e-05	0.431644	0.367058	0.353496	0.499565	0.440039	0.0422284	0.215142	0.348233	0.0247223	0.931498	0.524606	0.643159	0.157324	0.120416	0.0421621	0.99193	0.746444	4	18	0.222222
CDK9	203198_at				0.000362038	0.229179	0.017963	0.380847	0.610606	0.121885	0.417339	0.620441	0.660454	0.872575	0.438941	0.279183	0.109657	0.0478242	0.00906175	0.309898	0.287948	0.250449	4	18	0.222222
MTFR1	203208_s_at				0.0252965	0.0573688	0.0683618	0.615874	0.115851	0.00267315	0.384361	0.297176	0.150573	0.551256	0.550587	0.676697	0.00785389	0.0777328	0.189153	0.0110607	0.643284	0.684012	4	18	0.222222
MAPK9	203218_at				0.423013	0.176572	0.494161	0.182157	0.326032	0.313538	0.881527	0.420164	0.0203912	0.53114	0.885571	0.537387	0.212479	0.562817	0.45676	0.0151779	0.0276991	0.0357393	4	18	0.222222
LGALS9	203236_s_at				0.034152	0.112911	0.337585	0.210782	0.357652	0.0498962	0.0958337	0.562777	0.783146	0.61955	0.938969	0.960743	0.377648	0.267464	0.311766	0.0181744	0.0421663	0.646009	4	18	0.222222
NOTCH3	203237_s_at				0.211122	0.558652	0.929095	0.751845	0.867105	0.354551	0.725131	0.00307448	0.934457	0.976172	0.506408	0.502028	0.68316	0.00353513	0.0252555	0.0422459	0.204545	0.465205	4	18	0.222222
FCGBP	203240_at				0.503431	0.621437	0.150727	0.69005	0.114845	0.307927	0.26917	0.669582	0.669976	0.679779	0.606963	0.271825	0.0851355	0.033305	0.0727189	0.0342526	0.0138808	0.0447235	4	18	0.222222
PEX5	203244_at				0.000140125	0.647392	0.395671	0.364903	0.664813	0.481388	0.0947482	0.529913	0.371811	0.646379	0.041318	0.0983503	0.62585	0.926106	0.987189	0.0139595	0.358607	0.0450726	4	18	0.222222
DCTN6	203261_at				0.189962	0.147195	0.0176964	0.899135	0.613202	0.734321	0.816177	0.393478	0.00600248	0.0427737	0.502684	0.516717	0.4091	0.434297	0.422413	0.000481077	0.067195	0.977139	4	18	0.222222
FAM50A	203262_s_at				0.0390312	0.775401	0.451941	0.381756	0.0106406	0.0503606	0.828799	0.659477	0.0474193	0.792949	0.204758	0.886812	0.325504	0.943457	0.974674	0.970227	0.588882	0.00194425	4	18	0.222222
ARHGEF9	203264_s_at				0.0508391	0.808295	0.0704735	0.0361912	0.0449718	0.152298	0.686903	0.727041	0.951381	0.942019	0.0733999	0.0396295	0.0384702	0.253637	0.319262	0.0544582	0.611041	0.676822	4	18	0.222222
MAP2K4	203266_s_at				0.000548416	0.440445	0.0105276	0.824227	0.0829743	0.674837	0.527711	0.434457	0.786619	0.157034	0.540243	0.82414	0.0327167	0.981142	0.784764	0.000894588	0.751001	0.264152	4	18	0.222222
F8A1	203274_at				0.0100917	0.769042	0.87108	0.362899	0.281723	0.0122438	0.342657	0.0520935	0.0039494	0.0162788	0.0768438	0.273307	0.741158	0.811002	0.911835	0.274794	0.440877	0.479025	4	18	0.222222
SAFB2	203280_at				0.00125839	0.35166	0.0361324	0.687222	0.202404	0.432803	0.822112	0.589844	0.834299	0.308237	0.328763	0.911581	0.412497	0.867761	0.398998	0.00607931	0.0306246	0.608922	4	18	0.222222
ATP1A2	203295_s_at				0.045551	0.192226	0.119806	0.797411	0.14631	0.266313	0.637276	0.805102	0.033422	0.435445	0.0394338	0.262216	0.95384	0.207935	0.0493563	0.094254	0.459535	0.1562	4	18	0.222222
AP1S2	203300_x_at				0.994069	0.889668	0.72434	0.926064	0.831018	0.889923	0.0755705	0.164782	0.0149233	0.495192	0.0245581	0.384183	0.0188086	0.145683	0.366656	0.527148	0.355944	0.0364303	4	18	0.222222
C6orf165	203306_s_at				0.040135	0.600953	0.0536782	0.183698	0.229061	0.00727729	0.378629	0.33597	0.526501	0.815631	0.489645	0.95436	0.0288012	0.998867	0.444361	0.0139632	0.250285	0.0710129	4	18	0.222222
SNRPE	203316_s_at				0.000368713	0.703652	0.0105996	0.967208	0.463526	0.736328	0.479712	0.980881	0.0686118	0.652055	0.145306	0.795189	0.00514902	0.383933	0.240611	0.00811122	0.991951	0.0521833	4	18	0.222222
INPP5D	203331_s_at				0.213467	0.196977	0.0487197	0.933694	0.0595603	0.0390433	0.624233	0.325375	0.70907	0.218143	0.939598	0.676907	0.958056	0.174806	0.0871626	0.00375064	0.0163527	0.0774836	4	18	0.222222
ETV5	203349_s_at				0.257817	0.238683	0.495544	0.683272	0.553478	0.303423	0.665346	0.234944	0.0768645	0.662618	0.0296477	0.86053	0.00956164	0.682121	0.328861	0.622149	0.0087706	0.0285789	4	18	0.222222
PSD3	203355_s_at				0.0593421	0.710988	0.0942575	0.753616	0.996415	0.0465411	0.000301006	0.338906	0.100319	0.983971	0.0238043	0.772174	0.629978	0.438491	0.308237	0.00799925	0.377816	0.364887	4	18	0.222222
MYCBP	203361_s_at				0.536367	0.72834	0.313184	0.42202	0.772228	0.139426	0.409697	0.0219194	0.0209075	0.893909	0.0347808	0.470225	0.370992	0.765862	0.0607441	0.0101981	0.876412	0.632323	4	18	0.222222
PCF11	203378_at				0.0121865	0.333297	0.0104972	0.710229	0.047878	0.746564	0.195581	0.472808	0.506694	0.221851	0.627133	0.278097	0.807968	0.118803	0.303994	0.0100485	0.313965	0.876349	4	18	0.222222
ARRB2	203388_at				0.178276	0.0598172	0.515933	0.663619	0.243692	0.0121208	0.0957046	0.0248471	0.0376477	0.0675486	0.435568	0.623304	0.289423	0.672477	0.11916	0.173201	0.595792	0.0469031	4	18	0.222222
PSMA4	203396_at				0.121185	0.674245	0.0296383	0.362343	0.11317	0.0897835	0.838308	0.576697	0.0261564	0.780228	0.0200878	0.840475	0.00513427	0.6001	0.270562	0.269556	0.101888	0.353187	4	18	0.222222
RNF6	203403_s_at				0.281342	0.0790034	0.0367815	0.388575	0.254001	0.0235055	0.611552	0.396772	0.244992	0.175398	0.690268	0.742328	0.022958	0.286314	0.614304	0.00603421	0.987723	0.585745	4	18	0.222222
MFAP1	203406_at				5.75e-06	0.541924	0.275993	0.683178	0.165505	0.0927939	0.824248	0.403442	0.122775	0.00721393	0.948524	0.202685	0.0113839	0.109454	0.124918	0.00433462	0.701795	0.462101	4	18	0.222222
C1orf9	203429_s_at				0.724122	0.283272	0.000977326	0.0369616	0.68494	0.0161578	0.893017	0.863366	0.764601	0.409767	0.341104	0.400842	0.0843669	0.194637	0.293762	0.000491754	0.768887	0.258076	4	18	0.222222
TMPO	203432_at				0.932148	0.127906	0.133644	0.693739	0.719266	0.00748225	0.97384	0.326645	0.427946	0.856327	0.231539	0.485306	0.0370836	0.155583	0.296893	0.0256946	0.96468	0.0473812	4	18	0.222222
STC2	203438_at				0.195082	0.243859	0.329288	0.519436	0.356188	0.601013	0.102628	0.0360124	0.00526229	0.546158	0.128347	0.641969	0.106192	0.57665	0.111271	0.279808	0.0458923	0.000485885	4	18	0.222222
MRPL19	203465_at				0.372293	0.13498	0.506325	0.672179	0.623663	0.158432	0.697097	0.50539	0.394776	0.363088	0.484031	0.427551	0.0332394	0.0029325	0.0681216	0.00453659	0.497945	0.0471749	4	18	0.222222
CDK10	203468_at				0.0264009	0.927758	0.130696	0.742796	0.449231	0.0442228	0.495678	0.0243065	0.634102	0.771066	0.631896	0.225189	0.744253	0.177471	0.761461	0.012681	0.894547	0.676642	4	18	0.222222
IQGAP2	203474_at				0.363333	0.197754	0.175366	0.766628	0.0592733	0.19973	0.0404775	0.0757871	0.123728	0.282741	0.737943	0.610205	0.0162487	0.557474	0.283624	0.910511	0.0340398	7.65e-05	4	18	0.222222
SEC61G	203484_at				8.07e-06	0.789728	0.0817805	0.113849	0.719148	0.170979	0.275776	0.627954	0.00351255	0.200569	0.00482616	0.357336	0.109848	0.377252	0.153073	0.0465281	0.656716	0.991451	4	18	0.222222
ARMC8	203486_s_at				7.12e-05	0.32807	0.228944	0.922218	0.22128	0.0194163	0.17155	0.332611	0.515402	0.919646	0.408628	0.554647	0.041269	0.834329	0.813162	0.0144006	0.299983	0.0609593	4	18	0.222222
CEP57	203494_s_at				0.256563	0.184372	0.151374	0.543986	0.242569	4.48e-05	0.0387982	0.954419	0.0421771	0.3954	0.124165	0.441324	0.157225	0.219935	0.0702731	0.112348	0.99609	0.0398079	4	18	0.222222
MED1	203497_at				0.0025224	0.704768	0.775852	0.0560118	0.382425	0.00746806	0.713588	0.27049	0.456472	0.921117	0.783638	0.371326	0.0356051	0.0369311	0.129449	0.156257	0.562784	0.409619	4	18	0.222222
BPGM	203502_at				0.482006	0.224034	0.158727	0.509746	0.093998	0.171829	0.253944	0.0924588	0.0224435	0.00946953	0.889958	0.846313	0.121335	0.764841	0.207933	0.0329539	0.0194981	0.101567	4	18	0.222222
STAM	203544_s_at				0.405826	0.228315	0.0469366	0.725206	0.265137	0.0745346	0.972389	0.672607	0.922168	0.785028	0.412317	0.370627	0.00828036	0.304498	0.275872	0.00437976	0.942455	0.0383644	4	18	0.222222
MAP4K5	203552_at				0.110344	0.433894	0.341519	0.505055	0.181405	0.0065021	0.541868	0.991758	0.51215	0.0986856	0.173227	0.0292571	0.0465643	0.465051	0.463909	0.0101532	0.744792	0.254515	4	18	0.222222
MNAT1	203565_s_at				0.111828	0.842622	0.76881	0.861232	0.0637763	0.0910826	0.75354	0.345985	0.00157198	0.0020296	0.127229	0.112841	0.370244	0.00816187	0.0554551	0.00584904	0.865986	0.0872761	4	18	0.222222
NFIL3	203574_at				0.04684	0.531956	0.869766	0.294845	0.673958	0.0403713	0.766409	0.889297	0.115166	0.640721	0.145016	0.588285	0.558478	0.354641	0.23607	0.0183888	0.434686	0.0312734	4	18	0.222222
RAB4A	203581_at				0.0235284	0.0368578	0.151134	0.319325	0.962903	0.561509	0.960524	0.471919	0.103256	0.0261328	0.0940114	0.0711169	0.00989927	0.22496	0.119604	0.0598069	0.599976	0.115882	4	18	0.222222
ZBTB17	203601_s_at				0.468575	0.709119	0.236578	0.591419	0.501542	0.0202421	0.0471022	0.611708	0.20076	0.782291	0.0281749	0.338692	0.607468	0.546208	0.43269	0.0147086	0.262536	0.329321	4	18	0.222222
NDUFB6	203613_s_at				0.631345	0.680229	0.487945	0.00258377	0.336015	0.256271	0.603644	0.347729	0.213919	0.87209	0.0259602	0.124757	5.88e-05	0.113242	0.230394	0.00853483	0.558541	0.661184	4	18	0.222222
SLX1B-SULT1A4	203615_x_at				0.399139	0.00348037	0.33724	0.630833	0.61267	0.265602	0.885924	0.32039	0.02784	0.219946	0.996245	0.677844	0.714268	0.902661	0.754617	0.161346	0.0411275	0.0438412	4	18	0.222222
COG5	203629_s_at				0.0813567	0.27591	0.345632	0.117077	0.252863	0.00522152	0.871079	0.38865	0.666965	0.28138	0.840009	0.194878	0.00283031	0.0110161	0.0739473	0.40406	0.824662	0.04774	4	18	0.222222
MBNL2	203640_at				0.380068	0.0981835	0.283963	0.249306	0.186451	4.96e-05	0.948198	0.250573	0.00906199	0.0675482	0.613322	0.681513	0.0668917	0.303895	0.115096	0.0299612	0.232992	0.0148399	4	18	0.222222
TBCA	203667_at				0.0324656	0.451206	0.123488	0.345616	0.406838	0.153034	0.264952	0.82542	0.212128	0.752259	0.0487695	0.400867	0.0103993	0.436432	0.577533	0.141312	0.0267259	0.182714	4	18	0.222222
PDE4B	203708_at				0.164566	0.851389	0.343781	0.208122	0.020542	0.586843	0.537124	0.239042	0.252862	0.804876	0.242175	0.915611	0.702206	0.0472876	0.054189	0.556736	0.0201189	0.0130243	4	18	0.222222
KIAA0020	203712_at				0.01267	0.0374543	0.349477	0.953047	0.244238	0.000347584	0.312015	0.52052	0.277118	0.552452	0.0337963	0.286769	0.338718	0.287742	0.669934	0.234176	0.811798	0.972232	4	18	0.222222
HMGB3	203744_at				0.43183	0.210757	0.929861	0.0813254	0.950301	0.692786	0.82814	0.975325	0.414735	0.86265	0.0261453	0.00091974	0.374799	0.0330526	0.109122	0.870424	0.0474248	0.114671	4	18	0.222222
HCCS	203745_at				0.00123224	0.0478581	0.865774	0.88885	0.650522	0.0455601	0.063612	0.818611	0.956744	0.445569	0.415916	0.109426	0.151516	0.113108	0.0889702	0.015994	0.0688901	0.237825	4	18	0.222222
HCCS	203746_s_at				0.0214864	0.192959	0.155937	0.708146	0.047037	0.599646	0.289297	0.868294	0.707113	0.816597	0.584381	0.883896	0.104468	0.0354824	0.00502912	0.132466	0.332458	0.287199	4	18	0.222222
CTSO	203758_at				0.373887	0.44589	0.161715	0.310309	0.281356	0.0328963	0.971098	0.43362	0.213857	0.555739	0.436531	0.82648	0.924966	0.113184	0.0836908	0.00799291	0.025617	0.0349147	4	18	0.222222
TPD52L1	203786_s_at				0.00182784	0.993117	0.789789	0.071869	0.536552	0.0283451	0.667178	0.263708	0.00741765	0.106907	0.514345	0.563003	0.932809	0.0168461	0.194605	0.748109	0.196209	0.227356	4	18	0.222222
PCGF2	203793_x_at				0.153725	0.0957388	0.416279	0.603593	0.318314	0.0224968	0.494052	0.550204	0.0415587	0.0411404	0.17929	0.269643	0.126888	0.486076	0.452741	0.00719617	0.35253	0.366312	4	18	0.222222
GUCY1B3	203817_at				0.798028	0.0049511	0.132974	0.925068	0.745282	0.174264	0.924356	0.649838	0.558982	0.0502082	0.877549	0.126388	0.0218123	0.0864326	0.0372699	0.0124446	0.159868	0.179212	4	18	0.222222
IGF2BP3	203819_s_at				0.287614	0.701795	0.0621329	0.0222899	0.618363	0.945767	0.6454	0.790179	0.96529	0.746249	0.257888	0.267586	0.419577	0.0199226	0.00179445	0.345857	0.0103821	0.685886	4	18	0.222222
ELP4	203829_at				0.011044	0.0443579	0.842035	0.360668	0.51407	0.153381	0.547318	0.460736	0.292162	0.106205	0.241603	0.0340416	0.0811812	0.142492	0.341427	0.0057413	0.966466	0.396386	4	18	0.222222
C17orf75	203830_at				0.535288	0.388224	0.492755	0.467055	0.615055	0.252045	0.128724	0.606438	0.733965	0.177245	0.237526	0.784904	0.0424473	0.0126094	0.029351	0.0135248	0.895462	0.635841	4	18	0.222222
VRK1	203856_at				0.457342	0.263819	0.0327844	0.897688	0.10814	0.00967051	0.688446	0.04909	0.343514	0.96761	0.331328	0.542309	0.198357	0.158037	0.333738	0.0420931	0.872001	0.45452	4	18	0.222222
SMARCA1	203874_s_at				0.494912	0.312731	0.0149654	0.444656	0.273912	0.107398	0.676645	0.460049	0.000909888	0.00128695	0.094399	0.10136	0.062358	0.975242	0.713879	0.0364085	0.182681	0.0888093	4	18	0.222222
RAB11FIP2	203883_s_at				0.000112257	0.510975	0.468005	0.122613	0.131451	0.0416207	0.930736	0.237527	0.806249	0.486293	0.151848	0.113421	0.0463689	0.433676	0.210152	0.925053	0.519547	0.00817674	4	18	0.222222
HEPH	203902_at				0.00149147	0.561221	0.132003	0.20877	0.867655	0.788387	0.0906764	0.389665	0.0301712	0.962217	0.0122707	0.285358	0.34846	0.500531	0.988637	0.00692995	0.138148	0.123327	4	18	0.222222
SLC4A4	203908_at				0.0516429	0.114552	0.0531948	0.0989662	0.67573	0.052797	0.488039	0.457731	0.14306	0.0923339	0.959381	0.757731	0.44634	0.0376387	0.0445765	0.261793	0.00835908	0.0117197	4	18	0.222222
SLC9A6	203909_at				0.164968	0.207177	0.0494308	0.368856	0.234789	0.0378595	0.400212	0.428764	0.6002	0.437926	0.897455	0.990186	0.00557044	0.765467	0.857911	0.00044347	0.26564	0.133274	4	18	0.222222
ARHGAP29	203910_at				0.00279795	0.346415	0.11506	0.891691	0.372536	0.324322	0.540596	0.969477	0.262012	0.0831678	0.391037	0.0958424	0.0331554	0.682857	0.630114	0.0257839	0.587937	0.0443706	4	18	0.222222
RAP1GAP	203911_at				0.31914	0.313371	0.0143682	0.0583975	0.0304638	0.00925025	0.862409	0.449218	0.960387	0.92042	0.181874	0.851811	0.265722	0.293647	0.291032	0.915448	0.759622	0.024154	4	18	0.222222
CYBB	203923_s_at				0.183333	0.356092	0.764444	0.883731	0.843098	0.635397	0.675715	0.396524	0.00940807	0.182789	0.0872724	0.603108	0.48097	0.551244	0.319055	0.0146787	0.0169713	0.00793031	4	18	0.222222
GCLM	203925_at				0.470536	0.335705	0.849628	0.0859699	0.677937	0.765428	0.125828	0.469338	0.119761	0.161145	0.12428	0.153531	0.041558	0.00668647	0.036375	0.0645195	0.189245	0.0252728	4	18	0.222222
HLA-DMB	203932_at				0.348302	0.281403	0.416788	0.165645	0.314912	0.837737	0.613153	0.273209	0.688367	0.0162633	0.510873	0.507884	0.110657	0.460656	0.634251	0.00262416	0.00127948	0.00364527	4	18	0.222222
E2F6	203957_at				0.0485291	0.871662	0.0575363	0.247373	0.359543	0.0116112	0.627842	0.194559	0.0734368	0.0826265	0.94631	0.755996	0.26577	0.086258	0.0448829	0.0142285	0.269105	0.172258	4	18	0.222222
ZBTB40	203958_s_at				0.0216918	0.865586	0.207421	0.402836	0.456968	0.812162	0.0133999	0.703956	0.0174916	0.226397	0.0645413	0.279099	0.744512	0.532614	0.110532	0.00288045	0.389729	0.628311	4	18	0.222222
TSNAX	203983_at				0.307351	0.30163	0.304578	0.609821	0.161924	0.518863	0.309491	0.878937	0.0172422	0.76365	0.0250143	0.510074	0.0265068	0.527755	0.508142	0.0241048	0.710183	0.859844	4	18	0.222222
FAM47E	203986_at				0.000425197	0.845826	0.0193293	0.726859	0.450754	0.167823	0.227024	0.611327	0.319164	0.696288	0.649185	0.994441	0.457042	0.0227587	0.146661	0.0129584	0.14979	0.145036	4	18	0.222222
NUPL2	204003_s_at				0.00100345	0.95637	0.372163	0.490106	0.538103	0.0517075	0.233138	0.63746	0.82011	0.229875	0.505464	0.0561624	0.320184	0.231413	0.043356	0.00542582	0.0174554	0.405176	4	18	0.222222
PAWR	204005_s_at				0.0115617	0.274886	0.991396	0.044567	0.691434	0.251838	0.409626	0.612488	0.0208271	0.704002	0.0407998	0.894866	0.0731538	0.371508	0.138959	0.259876	0.880982	0.0570518	4	18	0.222222
LCMT2	204012_s_at				2.61e-05	0.387797	0.658044	0.226406	0.025254	0.016276	0.974812	0.547855	0.45318	0.0340774	0.860509	0.526573	0.0994075	0.166205	0.739604	0.114352	0.532597	0.77599	4	18	0.222222
DUSP4	204015_s_at				0.0126452	0.630343	0.931259	0.615567	0.208284	0.0446258	0.148242	0.90237	0.196372	0.862398	0.0407374	0.521375	0.700009	0.190585	0.570325	0.209705	0.0620258	0.0269286	4	18	0.222222
PURA	204020_at				0.00315926	0.326512	0.657801	0.396937	0.310186	0.000795102	0.238331	0.0386949	0.588062	0.642178	0.416127	0.919839	0.824208	0.696459	0.183011	0.0118971	0.773407	0.209414	4	18	0.222222
ZWINT	204026_s_at				0.965565	0.524805	0.173025	0.300242	0.203901	0.115515	0.0311243	0.0827325	0.362908	0.296298	0.67204	0.518907	0.0215819	0.860884	0.989868	0.0148996	0.0436832	0.0554059	4	18	0.222222
SFRP4	204051_s_at				0.887168	0.11884	0.256423	0.81579	0.964714	0.895494	0.353299	0.533639	0.0134691	0.240322	0.00695458	0.595795	0.508163	0.4603	0.187156	0.138378	0.0140646	0.000882011	4	18	0.222222
ME1	204059_s_at				0.880291	0.789947	0.324999	0.63638	0.442637	0.692435	0.988117	0.138978	0.112946	0.55774	0.000221152	0.0213088	0.00248751	0.349944	0.976264	0.0256921	0.112311	0.0519868	4	18	0.222222
FRY	204072_s_at				0.00963308	0.874332	0.0281716	0.545405	0.76138	0.378836	0.139291	0.847189	0.792425	0.994758	0.909882	0.730933	0.011936	0.353477	0.167722	0.00802832	0.15129	0.212023	4	18	0.222222
TPST2	204079_at				0.0435073	0.321653	0.0204102	0.793759	0.0724886	0.563905	0.835293	0.413822	0.458343	0.547236	0.334999	0.265457	0.280174	0.863302	0.437765	0.601367	0.0382471	0.0458826	4	18	0.222222
SLC5A6	204087_s_at				0.0352362	0.0271325	0.146666	0.29553	0.18319	0.581451	0.0237586	0.068796	0.663546	0.750146	0.173542	0.138789	0.114197	0.191824	0.225256	0.563007	0.566346	0.00489655	4	18	0.222222
EEF2	204102_s_at				0.0217246	0.207369	0.0260288	0.194575	0.799444	0.577308	0.245551	0.597839	0.104898	0.193716	0.0451398	0.0500816	0.720686	0.555379	0.225863	0.0152273	0.590575	0.857466	4	18	0.222222
NDUFAF1	204125_at				0.0116974	0.481689	0.113559	0.358103	0.0207055	0.806011	0.136979	0.679394	0.905914	0.314458	0.305206	0.782172	0.0327171	0.860157	0.469186	0.0471234	0.85575	0.989976	4	18	0.222222
FOXO3	204131_s_at				0.00256849	0.0738616	0.0242834	0.33128	0.689908	0.848409	0.186256	0.00410968	0.0696132	0.0996723	0.535491	0.589876	0.62122	0.44746	0.185227	0.0422879	0.855211	0.467834	4	18	0.222222
TUBB2A	204141_at				0.0426386	0.192831	0.707332	0.101714	0.592307	0.0194027	0.81665	0.701639	0.902062	0.64101	0.449198	0.458637	0.0795743	0.121916	0.159729	0.433865	0.0319431	0.00231298	4	18	0.222222
ENOSF1	204142_at				0.80399	0.498176	0.525884	0.0131883	0.015821	0.0218176	0.382354	0.93692	0.336354	0.912968	0.800004	0.132316	0.968155	0.862519	0.309401	0.750944	0.24272	0.0331639	4	18	0.222222
MFNG	204153_s_at				1.87e-05	0.343385	0.826132	0.0970427	0.550597	0.34036	0.76687	0.607506	0.945053	3.62e-06	0.661479	0.00228821	0.617077	0.159805	0.410821	0.00395827	0.0546783	0.620026	4	18	0.222222
RP11-802E16.3	204158_s_at				0.0982258	0.801604	0.12585	0.795733	0.086237	0.00171897	0.670557	0.128646	0.0933688	0.0165283	0.47319	0.232654	0.197969	0.190744	0.0135236	0.0283974	0.0560392	0.815493	4	18	0.222222
CPOX	204172_at				0.0719371	0.78529	0.423028	0.457641	0.109662	0.00228855	0.831124	0.379449	0.0684205	0.0892412	0.729663	0.963521	0.52436	0.0021544	0.024371	0.0478374	0.98986	0.0626569	4	18	0.222222
IQCE	204202_at				0.102033	0.250121	0.859528	0.957582	0.0402607	0.323835	0.15687	0.584884	0.643409	0.727372	0.497135	0.312027	0.540425	0.0225456	0.14969	0.0277596	0.0687243	0.049286	4	18	0.222222
RNGTT	204208_at				0.00312165	0.145512	0.17214	0.424845	0.65345	0.000251093	0.846429	0.98941	0.643828	0.969626	0.391404	0.625215	0.520471	0.622745	0.0320543	0.00796489	0.0694318	0.839127	4	18	0.222222
PCYT1A	204209_at				0.0461677	0.873717	0.625201	0.0175372	0.926736	0.0939784	0.0458188	0.103183	0.42113	0.788633	0.574015	0.768358	0.637089	0.2513	0.945028	0.169834	0.575647	0.0166453	4	18	0.222222
PIGR	204213_at				0.696348	0.766435	0.333414	0.250748	0.642562	0.0213399	0.384391	0.468167	0.0109689	0.542246	0.0383422	0.822571	0.791232	0.0305475	0.206913	0.0690837	0.61593	0.128611	4	18	0.222222
GCH1	204224_s_at				0.699316	0.141782	0.239207	0.0737036	0.487882	0.0657245	0.485081	0.211515	0.228695	0.00768786	0.140436	0.0162211	0.623817	0.048233	0.21698	0.0195218	0.0686496	0.0908894	4	18	0.222222
HDAC4	204225_at				0.0391113	0.746407	0.0519322	0.0367917	0.152422	0.22931	0.319145	0.888112	0.216241	0.0818077	0.0165346	0.0168274	0.616344	0.847257	0.859903	0.807966	0.18818	0.720461	4	18	0.222222
CPT2	204263_s_at				1.77e-05	0.760033	0.0984721	0.54897	0.971539	0.35096	0.0108703	0.0206595	0.73241	0.13661	0.740849	0.789378	0.265125	0.560186	0.810275	0.652511	0.289907	2.79e-05	4	18	0.222222
GPSM3	204265_s_at				0.00428073	0.253942	0.583905	0.0161069	0.366594	0.00100179	0.345779	0.277579	0.243243	0.992733	0.27031	0.864996	0.459853	0.188012	0.510743	0.0202087	0.469959	0.0653749	4	18	0.222222
EDNRB	204271_s_at				0.182518	0.123431	0.319456	0.293834	0.33482	0.899558	0.427385	0.917584	0.034515	0.0416858	0.088147	0.114961	0.0161902	0.988846	0.818747	0.900966	0.00511982	0.0905606	4	18	0.222222
EBAG9	204274_at				0.478553	0.157667	0.172304	0.173944	0.283235	0.0184652	0.0124933	0.368105	0.121953	0.289074	0.212453	0.450349	0.00363749	0.49955	0.379457	0.0124125	0.948212	0.525433	4	18	0.222222
TK2	204276_at				0.273657	0.687835	0.156415	0.264936	0.762865	0.0281964	0.987679	0.908236	0.358047	0.913426	0.354902	0.87003	0.0440255	0.513172	0.878381	0.344182	0.0424236	0.021787	4	18	0.222222
STK11	204292_x_at				0.493201	0.00298613	0.206996	0.746587	0.455464	0.359404	0.248146	0.0107982	0.9955	0.47438	0.00668108	0.426688	0.54419	0.679268	0.794636	0.0249961	0.527006	0.963997	4	18	0.222222
LOX	204298_s_at				0.108018	0.545998	0.0479109	0.846141	0.112341	0.221658	0.780961	0.603921	0.580738	0.0412893	0.92717	0.110784	0.383209	0.383579	0.358057	0.0737683	0.000134538	0.00177342	4	18	0.222222
ZNF202	204327_s_at				0.000971986	0.43788	0.075377	0.426915	0.699612	0.740054	0.375796	0.409102	0.0620498	0.00252313	0.106817	0.0081114	0.478608	0.371646	0.479613	0.0117123	0.619207	0.387572	4	18	0.222222
F3	204363_at				0.040811	0.019527	0.342536	0.496936	0.785242	0.0220071	0.364614	0.0980198	0.581304	0.508564	0.798903	0.342812	0.716391	0.0977201	0.707557	0.99594	0.671009	0.0115236	4	18	0.222222
CLP1	204370_at				0.0787754	0.182803	0.313097	0.696647	0.334337	0.223494	0.524358	0.217908	0.0817149	0.00122341	0.19728	0.0110727	0.0490602	0.799667	0.566318	0.00130616	0.329729	0.688351	4	18	0.222222
SLC43A1	204394_at				0.661726	0.0970705	0.188625	0.786703	0.730374	0.944007	0.10527	0.0464508	0.0279799	0.00254229	0.201307	0.0179755	0.203376	0.449131	0.608811	0.993038	0.910985	0.678937	4	18	0.222222
FAM115A	204403_x_at				0.671219	0.225341	0.611805	0.994253	0.0288599	0.880335	0.319839	0.832605	0.0151864	0.256422	0.0103435	0.188472	0.72441	0.587408	0.950644	0.000125544	0.819701	0.532393	4	18	0.222222
HBG1	204419_x_at				0.343852	0.435005	0.0750845	0.0344188	0.823669	0.00203144	0.912658	0.217392	0.859433	0.786556	0.275388	0.0743693	0.487149	0.0238274	0.430401	0.0339191	0.754402	0.804726	4	18	0.222222
MKLN1	204423_at				3.23e-05	0.0579403	0.205416	0.809558	0.145978	0.347146	0.876951	0.28805	0.012587	0.815675	0.076849	0.716109	0.0101751	0.096619	0.436593	0.328934	0.497746	0.0291409	4	18	0.222222
ARHGAP4	204425_at				0.00430899	0.0104076	0.169883	0.270882	0.515576	0.0518927	0.715302	0.134524	0.548045	0.915395	0.463719	0.48805	0.791034	0.784485	0.74276	0.0177333	0.0214302	0.581619	4	18	0.222222
TLE2	204431_at				0.00132582	0.0341965	0.0477991	0.405814	0.0587832	0.458661	0.0084709	0.703065	0.949846	0.728822	0.821369	0.746143	0.283567	0.4461	0.180518	0.239628	0.908741	0.901276	4	18	0.222222
AL603926.1	204453_at				0.00323236	0.152368	0.160065	0.310111	0.689624	0.000382286	0.548403	0.745399	0.000832434	0.359058	0.0223971	0.731857	0.448391	0.918178	0.183203	0.997177	0.922696	0.85194	4	18	0.222222
RAD1	204461_x_at				0.318675	0.773454	0.827895	0.402395	0.274112	0.00289038	0.9543	0.987951	0.00937801	0.202622	0.00813187	0.211904	0.323826	0.0303275	0.093054	0.498282	0.430356	0.352582	4	18	0.222222
OSTF1	204479_at				0.0492371	0.867083	0.0319009	0.268404	0.773302	0.343706	0.0950517	0.0922345	0.020606	0.147572	0.0498624	0.0628389	0.132453	0.41568	0.290858	0.526193	0.113577	0.0653142	4	18	0.222222
C9orf16	204480_s_at				0.000155914	0.964543	0.244086	0.203901	0.707936	0.0310696	0.964727	0.271631	0.0282389	0.32741	0.0178353	0.102129	0.390832	0.5848	0.463538	0.436116	0.660763	0.280012	4	18	0.222222
PIK3C2B	204484_at				0.301976	0.494013	0.502608	0.360359	0.0532659	0.117197	0.63782	0.274795	0.870468	0.679765	0.624701	0.445534	0.0147411	0.0298161	0.0299785	0.131086	0.477287	0.0429536	4	18	0.222222
CD44	204489_s_at				1.95e-05	0.404903	0.315338	0.617248	0.19855	0.35564	0.177626	0.260299	0.860048	0.674555	0.361674	0.124001	0.0294871	0.912071	0.659114	0.487237	0.029834	0.0135389	4	18	0.222222
C15orf39	204495_s_at				0.187162	0.437799	0.0491429	0.519534	0.225312	0.4405	0.235773	0.270359	0.754139	0.197193	0.911672	0.286494	0.135166	0.0879609	0.0122933	0.0370506	0.728862	0.0480961	4	18	0.222222
ADCY9	204498_s_at				0.00622664	0.806873	0.523727	0.0653712	0.179594	0.0724268	0.243932	0.828891	0.00629765	0.178066	0.0032174	0.327736	0.325774	0.798121	0.533418	0.0553338	0.0494325	0.0623422	4	18	0.222222
CDC7	204510_at				0.0296331	0.665328	0.0682775	0.147529	0.394067	0.000528898	0.746982	0.162074	0.151091	0.0103415	0.899325	0.142607	0.0705895	0.278763	0.515596	0.0101302	0.435986	0.151052	4	18	0.222222
ZNF140	204523_at				0.00548495	0.116439	0.0696664	0.138201	0.401546	0.00325423	0.0138246	0.927631	0.0989341	0.16081	0.498203	0.471682	0.0119771	0.727645	0.508799	0.0597497	0.809672	0.91812	4	18	0.222222
HPS5	204544_at				0.00130376	0.376772	0.0420753	0.717138	0.361504	0.00224718	0.150568	0.492733	0.869812	0.498046	0.537797	0.970024	0.332537	0.577457	0.509303	0.364555	0.491094	0.0358562	4	18	0.222222
PPP1R3D	204555_s_at				0.0588486	0.827909	0.203167	0.975302	0.0504542	0.306699	0.0206744	0.0810326	0.0477125	0.321685	0.0296116	0.459209	0.855519	0.540236	0.23736	0.0155797	0.936362	0.593938	4	18	0.222222
IRF4	204562_at				0.000133225	0.292855	0.512202	0.00112053	0.0514879	0.0241983	0.390988	0.52683	0.30512	0.57587	0.836629	0.255401	0.952195	0.491021	0.354339	0.00176464	0.241207	0.818587	4	18	0.222222
PCGF3	204564_at				0.0831001	0.670391	0.0291187	0.347732	0.904199	0.298013	0.207144	0.467087	0.052583	0.618076	0.0440895	0.415896	0.0217032	0.610724	0.916987	0.0118342	0.700614	0.663548	4	18	0.222222
PPIP5K1	204578_at				0.335388	0.68486	0.0757474	0.59367	0.610545	0.565364	0.148048	0.609335	0.0418722	0.255797	0.787358	0.738127	0.783229	0.0492867	0.813356	0.459845	0.027924	0.0426641	4	18	0.222222
FGFR4	204579_at				0.0447782	0.390876	0.308654	0.886861	0.620035	0.0538279	0.0997971	0.666686	0.05195	0.882077	0.0480879	0.970476	0.355673	0.0294792	0.0180876	0.118913	0.712664	0.340993	4	18	0.222222
MRPL28	204599_s_at				0.00190244	0.387471	0.274033	0.244571	0.540092	0.0159417	0.803032	0.62473	0.0730958	0.775742	0.0677981	0.994192	0.114183	0.352464	0.0289826	0.00580715	0.79907	0.107318	4	18	0.222222
IDI1	204615_x_at				0.041181	0.0535818	0.325173	0.409742	0.742108	0.420857	0.0242142	0.822716	0.111274	0.191036	0.156221	0.179165	9.34e-05	0.866086	0.705739	0.0467516	0.248704	0.382229	4	18	0.222222
VCAN	204620_s_at				0.0136343	0.301195	0.881971	0.261456	0.174371	0.133303	0.344636	0.514853	0.0111903	0.361823	0.0535314	0.504881	0.113308	0.902581	0.975416	0.0388218	0.090765	0.005868	4	18	0.222222
S1PR1	204642_at				0.555207	0.167554	0.370079	0.38785	0.628626	0.0116675	0.891643	0.595842	0.333515	0.00924191	0.338609	0.0138324	0.00181625	0.83572	0.788708	0.557733	0.716046	0.109117	4	18	0.222222
ENOX2	204644_at				0.0336142	0.766645	0.0353401	0.148551	0.94008	0.027876	0.742788	0.787022	0.183972	0.487366	0.110286	0.848945	0.704781	0.788123	0.847624	0.00732979	0.374775	0.187191	4	18	0.222222
HLA-DRB1	204670_x_at				0.697414	0.23527	0.0716513	0.0602512	0.427799	0.357415	0.663442	0.446017	0.60664	0.516286	0.706749	0.634824	0.866029	0.0412113	0.0339119	0.0446626	0.0215872	0.0585722	4	18	0.222222
MUC2	204673_at				0.608975	0.608507	0.117992	0.0446843	0.390263	0.174129	0.467434	0.865048	0.510958	0.666436	0.845853	0.958551	0.107055	0.00620494	0.00510873	0.00682427	0.494759	0.423347	4	18	0.222222
TMEM186	204676_at				0.0402701	0.595561	0.0390726	0.681084	0.242764	0.0302974	0.69918	0.566783	0.642852	0.604792	0.697019	0.743039	0.525097	0.262111	0.238616	0.00683156	0.234977	0.0576779	4	18	0.222222
SGCE	204688_at				0.0960071	0.213642	0.359502	0.205928	0.446878	0.0286208	0.170448	0.0723292	0.384136	0.541435	0.693372	0.506857	0.123396	0.74887	0.585824	0.000533742	0.0125345	0.0342007	4	18	0.222222
IFT88	204703_at				0.00817611	0.106576	0.0661948	0.372957	0.856668	0.00836072	0.346932	0.552935	0.0414971	0.0521888	0.152905	0.738283	0.292958	0.0108126	0.131843	0.31942	0.666962	0.379823	4	18	0.222222
CENPC1	204739_at				0.692798	0.0575371	0.598037	0.609928	0.464142	0.0147427	0.352114	0.964551	0.00194813	0.027979	0.607977	0.870562	0.0541884	0.344429	0.212891	0.000659693	0.260353	0.0526549	4	18	0.222222
PARP2	204752_x_at				0.0330965	0.585476	0.125687	0.708449	0.873141	0.0826964	0.0985833	0.0522064	0.0213744	0.0155023	0.519606	0.110484	0.583328	0.339431	0.870961	0.000487725	0.617391	0.393957	4	18	0.222222
HLF	204755_x_at				0.158038	0.557609	0.300415	0.0634336	0.995836	0.615435	0.55994	0.0409701	0.728669	0.249938	0.964903	0.557258	0.051069	0.0404773	0.097298	0.034568	0.00193789	0.0572786	4	18	0.222222
FEN1	204767_s_at				0.508529	0.693138	0.680108	0.274989	0.227163	0.00533672	0.738114	0.95441	0.96303	0.182848	0.697338	0.373962	0.0217588	0.971286	0.891884	0.359035	0.00738337	0.0022458	4	18	0.222222
FMNL1	204789_at				0.153264	0.349651	0.122006	0.0344012	0.582733	0.00361592	0.537801	0.267584	0.572249	0.457533	0.271049	0.828067	0.515168	0.0384267	0.621074	0.00193276	0.330841	0.779103	4	18	0.222222
NR2C1	204791_at				0.892707	0.342796	0.0221908	0.144687	0.122153	0.0232875	0.54011	0.252839	0.686175	0.949794	0.725354	0.947985	0.603475	0.207066	0.322598	0.0117528	0.41768	0.0116841	4	18	0.222222
IFT140	204792_s_at				0.277001	0.490262	0.0489661	0.0219623	0.0540311	0.10212	0.81976	0.251677	0.148629	0.738127	0.00916895	0.0264425	0.611418	0.151437	0.215286	0.281708	0.647574	0.439018	4	18	0.222222
GPRASP1	204793_at				0.798701	0.957534	0.168348	0.147057	0.559852	0.134393	0.159709	0.296148	0.0380943	0.178312	0.315801	0.417574	0.0367274	0.0858212	0.0348242	0.0195804	0.0993559	0.204997	4	18	0.222222
RRAD	204803_s_at				0.0239797	0.953834	0.208105	0.877639	0.00818916	0.00222677	0.732371	0.195917	0.0148686	0.0866436	0.404726	0.372889	0.690578	0.502252	0.31217	0.593795	0.368433	0.265443	4	18	0.222222
CLPX	204809_at				0.0187408	0.169076	0.491012	0.656068	0.294069	0.307685	0.376938	0.120905	0.914334	0.682125	0.589789	0.990856	0.146442	0.0107721	0.0174328	0.0172574	0.159325	0.0824383	4	18	0.222222
ZW10	204812_at				0.00460353	0.842156	0.628349	0.59755	0.125103	0.00653979	0.713746	0.169575	0.0929156	0.151232	0.860339	0.619937	0.0155924	0.422556	0.23841	0.141505	0.0430715	0.161663	4	18	0.222222
CDK8	204831_at				0.134697	0.056409	0.68844	0.301316	0.243282	0.000497439	0.961295	0.56102	0.0644477	0.415152	0.0134994	0.152255	0.0193852	0.0535057	0.134817	0.0180626	0.564061	0.115993	4	18	0.222222
EEA1	204840_s_at				0.199128	0.519867	0.0380181	0.932209	0.0428771	0.817521	0.0408709	0.688594	0.123263	0.655206	0.154656	0.494772	0.179249	0.17696	0.473333	0.0889211	0.527464	0.00645821	4	18	0.222222
ENPEP	204844_at				0.000365084	0.0569615	0.156057	0.549551	0.683438	0.55719	0.260891	0.811293	0.0496089	0.520351	0.162719	0.839419	0.0312588	0.0379759	0.0883526	0.199709	0.140028	0.51558	4	18	0.222222
HBG1	204848_x_at				0.352084	0.113447	0.0237334	0.0357937	0.53688	0.00097719	0.563495	0.142894	0.93568	0.508451	0.282975	0.100012	0.179502	0.0114288	0.162846	0.154252	0.376695	0.437357	4	18	0.222222
NAIP	204860_s_at				0.0468541	0.495816	0.550676	0.74167	0.613583	0.537363	0.142455	0.601941	0.00580794	0.00315053	0.20451	0.149652	0.327434	0.655254	0.25471	0.668452	0.117714	0.0294583	4	18	0.222222
LCK	204890_s_at				0.281163	0.324795	0.035038	0.507747	0.32	0.631211	0.0448585	0.197658	0.407643	0.90642	0.267167	0.78086	0.909256	0.0244848	0.0893966	0.0211183	0.553153	0.277177	4	18	0.222222
RP4-753P9.3	204923_at				0.0606488	0.540927	0.983399	0.308214	0.164236	0.283759	0.0400855	0.0264751	0.261886	0.312693	0.637624	0.622372	0.406072	0.41158	0.243456	0.00636841	0.0159672	0.342234	4	18	0.222222
ALDH3B2	204941_s_at				0.211084	0.750539	0.0964108	0.589702	0.191527	0.0161751	0.0405274	0.334562	0.0588414	0.0763274	0.629996	0.233288	0.997856	0.410781	0.0319851	0.0135492	0.27424	0.0583334	4	18	0.222222
NCF1	204961_s_at				0.0533575	0.24333	0.0115437	0.495584	0.205869	0.000274307	0.181398	0.656008	0.284954	0.0400806	0.805844	0.571074	0.834087	0.378544	0.212652	0.225588	0.0118692	0.148276	4	18	0.222222
C6orf47	204968_at				0.0119111	0.0384629	0.0395401	0.556703	0.459389	0.751097	0.492043	0.863919	0.899828	0.674397	0.614731	0.867307	0.286016	0.960907	0.693834	0.00446971	0.49052	0.216477	4	18	0.222222
TAOK2	204986_s_at				0.414239	0.143173	0.0850177	0.354521	0.552242	0.0120064	0.00574314	0.109814	0.377378	0.98645	0.67959	0.745786	0.0142909	0.899103	0.868821	0.0279721	0.7446	0.0616549	4	18	0.222222
ATF5	204998_s_at				0.269647	0.0360106	0.291955	0.245363	0.462904	0.489172	0.147792	0.0747037	0.00506478	0.0444589	0.161416	0.212989	0.882941	0.731449	0.978374	0.0411572	0.391613	0.875454	4	18	0.222222
VWA5A	205011_at				0.310703	0.535098	0.026752	0.876309	0.103684	0.0282653	0.588001	0.295243	0.736956	0.433279	0.931704	0.772966	0.242361	0.527195	0.331177	0.155907	0.0302196	0.00830424	4	18	0.222222
TGFA	205016_at				0.000409926	0.482543	0.161774	0.101319	0.863373	0.768465	0.925144	0.703917	0.600381	0.068615	0.271544	0.840566	0.00118625	0.0317229	0.0868363	0.650749	0.102325	0.0380299	4	18	0.222222
IKZF1	205039_s_at				0.319561	0.0764299	0.439745	0.817104	0.163251	0.709323	0.76709	0.93656	0.890731	0.617702	0.932475	0.689038	0.0448584	0.00961057	0.0168786	0.0197279	0.223744	0.15691	4	18	0.222222
IDUA	205059_s_at				3.32e-05	0.0691493	0.0543611	0.500723	0.152401	0.928408	0.445027	0.780979	0.656683	0.434664	0.546117	0.927616	0.0384416	0.0108258	0.00149942	0.19436	0.323206	0.777393	4	18	0.222222
AL928654.7	205081_at				0.000501846	0.707383	0.724645	0.104815	0.889678	0.708022	0.623156	0.480799	0.946679	0.268986	0.629197	0.243136	0.458977	0.0242352	0.00608504	0.00127619	0.1832	0.718699	4	18	0.222222
RWDD3	205087_at				0.38317	0.232668	0.819606	0.359799	0.265119	0.486959	0.49839	0.943576	0.0472598	0.3069	0.0431439	0.547736	0.0182704	0.484315	0.615525	0.016652	0.0505682	0.0935242	4	18	0.222222
ATP6V0A1	205095_s_at				0.0940271	0.0199312	0.0861323	0.304141	0.207078	0.157143	0.00362683	0.0232849	0.374566	0.105302	0.470971	0.118397	0.231687	0.235405	0.319084	0.040452	0.295207	0.349339	4	18	0.222222
APOB	205108_s_at				0.408225	0.0353049	0.836813	0.684774	0.227065	0.226205	0.979765	0.18445	0.470789	0.864696	0.109172	0.933293	0.0104115	0.513257	0.5607	0.012385	0.017105	0.18407	4	18	0.222222
FGF1	205117_at				0.0280809	0.082064	0.716815	0.229237	0.313197	0.894872	0.985538	0.783019	0.372743	0.480998	0.919297	0.785144	0.949252	0.784751	0.40107	0.00958398	0.0213325	0.00301781	4	18	0.222222
SGCB	205120_s_at				0.0220916	0.230504	0.713842	0.723219	0.596467	0.031232	0.349301	0.196795	0.0587208	0.293224	0.0949827	0.449525	0.0143264	0.882638	0.827393	0.214237	0.107893	0.00882653	4	18	0.222222
PLCD1	205125_at				0.819729	0.672378	0.575656	0.261048	0.876339	0.0485453	0.258361	0.931989	0.049107	0.986965	0.00637452	0.703815	0.208289	0.352741	0.89495	0.0234965	0.591911	0.275912	4	18	0.222222
FPGT	205140_at				0.00152306	0.069819	0.148374	0.212333	0.36217	0.353663	0.735457	0.822287	0.637442	0.532778	0.0417796	0.120954	0.0184985	0.522991	0.0719446	0.0229854	0.318991	0.293472	4	18	0.222222
ABCD1	205142_x_at				0.392506	0.0395819	0.668196	0.938487	0.394823	0.0310432	0.123857	0.0561922	0.895859	0.951217	0.59587	0.960572	0.0693605	0.344366	0.138777	0.00515673	0.269666	0.0421453	4	18	0.222222
PEX11A	205161_s_at				0.00152312	0.455448	0.788675	0.282316	0.35942	0.347801	0.169277	0.390931	0.31127	0.902414	0.0499037	0.408503	0.671759	0.0485521	0.0708508	0.20833	0.0457351	0.990196	4	18	0.222222
MYLPF	205163_at				0.512866	0.400361	0.0389991	0.499244	0.812756	0.744209	0.467472	0.784902	0.0164877	0.159302	0.122798	0.631253	0.283351	0.0243971	0.0911071	0.0241007	0.103103	0.17863	4	18	0.222222
CLTB	205172_x_at				8.24e-06	0.659209	0.222005	0.618805	0.761339	0.0414008	0.580429	0.743115	0.0449032	0.820799	0.0224946	0.777462	0.267196	0.131074	0.0680668	0.961998	0.621958	0.177911	4	18	0.222222
MAFF	205193_at				0.082145	0.561774	0.036901	0.270534	0.551599	0.0935877	0.785931	0.036342	0.0657382	0.131798	0.55058	0.77764	0.221946	0.00505475	0.00398169	0.928378	0.25215	0.637854	4	18	0.222222
TIMM8A	205217_at				0.276889	0.477576	0.800697	0.0686743	0.0472434	0.336403	0.919388	0.947502	0.021328	0.22495	0.30175	0.863807	0.125353	0.0240681	0.00160168	0.964294	0.367456	0.288903	4	18	0.222222
BAIAP2	205294_at				0.389481	0.80464	0.51997	0.497646	0.855825	0.412694	0.729038	0.00700425	0.149195	0.867907	0.0328627	0.590439	0.0432096	0.988846	0.758969	0.119964	0.0124336	0.950687	4	18	0.222222
IGFBP1	205302_at				0.125155	0.29014	0.721511	0.638451	0.608352	0.091562	0.228839	0.143143	0.0304008	0.355052	0.0247794	0.348776	0.51896	0.878834	0.0460268	0.00629744	0.393688	0.129236	4	18	0.222222
KMO	205306_x_at				0.000550331	0.67672	0.0219004	0.00853236	0.9072	0.04345	0.443708	0.356912	0.0739288	0.686694	0.392999	0.563285	0.113835	0.542973	0.276088	0.956305	0.090672	0.105098	4	18	0.222222
SPI1	205312_at				0.00394208	0.0100304	0.193831	0.429364	0.208132	0.00050407	0.757545	0.555659	0.698947	0.346485	0.113565	0.417482	0.450311	0.0587871	0.207666	0.00053901	0.8348	0.401747	4	18	0.222222
SLC15A2	205317_s_at				0.0266964	0.379656	0.381907	0.238224	0.197795	0.664529	0.296334	0.558564	0.254631	0.0487871	0.244359	0.217973	0.032621	0.531929	0.92752	0.00930766	0.848628	0.468645	4	18	0.222222
PVALB	205336_at				0.371522	0.282044	0.999158	0.72239	0.630699	0.833586	0.732902	0.703621	0.00352474	0.350567	0.146062	0.462756	0.634701	0.0106635	0.0156071	0.000578929	0.153525	0.0564421	4	18	0.222222
CRABP1	205350_at				0.92386	0.0209117	0.171948	0.985638	0.406569	0.800374	0.572389	0.928421	0.446676	0.607445	0.264375	0.866696	0.0277916	0.921579	0.261687	0.0199897	0.0193073	0.357289	4	18	0.222222
AKAP6	205359_at				0.661278	0.163673	0.0337194	0.756418	0.663945	0.158306	0.27017	0.0436314	0.0427013	0.0190836	0.491755	0.345523	0.913515	0.130258	0.378217	0.0538545	0.643026	0.117948	4	18	0.222222
DBT	205369_x_at				0.000464063	0.118099	0.401334	0.34861	0.769788	0.0132969	0.471145	0.179949	0.694005	0.834032	0.0661928	0.242769	0.548913	0.0362853	0.237945	0.00580451	0.364976	0.513214	4	18	0.222222
PDZK1	205380_at				0.430792	0.353782	0.0367242	0.231107	0.120606	0.0018915	0.438726	0.41591	0.480869	0.616965	0.211138	0.782744	0.0847649	0.0230961	0.00711954	0.0771532	0.0799942	0.853902	4	18	0.222222
CCL14	205392_s_at				0.00695362	0.313198	0.251005	0.295686	0.244767	0.781808	0.932165	0.549777	0.0329274	0.682955	0.141677	0.401298	0.0298851	0.14957	0.121296	0.0282126	0.256447	0.789897	4	18	0.222222
IL1R2	205403_at				0.00392112	0.10575	0.0446181	0.107139	0.28209	0.054044	0.137681	0.215634	0.385397	0.0444071	0.589748	0.138019	0.410721	0.40313	0.914184	0.507773	0.0212161	0.270968	4	18	0.222222
FOSL2	205409_at				0.0390252	0.870182	0.0153537	0.272557	0.47715	0.36953	0.656321	0.838965	0.104939	0.343087	0.512243	0.681825	0.933179	0.0162768	0.0989615	0.104922	0.967221	0.0492827	4	18	0.222222
MPPED2	205413_at				0.00600312	0.777263	0.0611461	0.0130145	0.105014	0.406165	0.354681	0.226844	0.0687384	0.0277962	0.986098	0.316558	0.844314	0.000122541	0.140785	0.577552	0.996132	0.18576	4	18	0.222222
PEX7	205420_at				0.0392012	0.0343995	0.0734842	0.19504	0.726972	0.39184	0.637234	0.452757	0.657761	0.719387	0.731223	0.619775	0.0197576	0.301001	0.108792	0.00794228	0.690367	0.361242	4	18	0.222222
ATP2A1	205444_at				0.0585347	0.386309	0.356101	0.275933	0.614764	0.19839	0.145319	0.144769	0.224854	0.653687	0.565329	0.954354	0.569508	0.00736006	0.016547	0.0101162	0.0033986	0.660395	4	18	0.222222
HS3ST1	205466_s_at				0.0358608	0.779042	0.762537	0.0530036	0.223836	0.0226355	0.302055	0.55637	0.837617	0.572456	0.994028	0.453614	0.960425	0.501839	0.387185	0.503919	0.0453336	0.0411088	4	18	0.222222
GZMA	205488_at				0.966981	0.841246	0.601425	0.801643	0.315925	0.187149	0.600956	0.490426	0.750466	0.726904	0.967913	0.515898	0.0155468	0.785711	0.945854	0.0062078	0.0106684	0.0365728	4	18	0.222222
GHR	205498_at				0.000964719	0.653771	0.555278	0.175044	0.286505	0.767394	0.855493	0.779698	0.00687447	0.135525	0.372459	0.606087	0.0127158	0.295893	0.293362	0.227303	0.0287033	0.848525	4	18	0.222222
GSPT2	205541_s_at				0.89383	0.592312	0.0827153	0.168226	0.100835	0.0125506	0.722994	0.205963	0.436783	0.0640886	0.951597	0.266037	0.144491	0.00868009	0.00126125	0.0820907	0.128824	0.0491071	4	18	0.222222
RPP38	205562_at				0.177841	0.450786	0.100305	0.318704	0.219998	0.781795	0.982094	0.920884	0.0102588	0.0032622	0.0115742	0.0138449	0.516169	0.0788259	0.142001	0.167806	0.646389	0.0505652	4	18	0.222222
AQP9	205568_at				0.00192998	0.12594	0.235526	0.407921	0.762718	0.194102	0.508827	0.435239	0.10951	0.0946266	0.555556	0.495645	0.0427892	0.332875	0.717976	0.0130063	0.0869902	0.0330652	4	18	0.222222
SCYL3	205607_s_at				1.19e-06	0.133339	0.430738	0.4516	0.306648	0.0342415	0.561312	0.126283	0.147312	0.138262	0.587501	0.313992	0.0286194	0.459759	0.686085	0.677276	0.624964	0.0314948	4	18	0.222222
AC012318.1	205644_s_at				0.50652	0.580179	0.0535511	0.616775	0.258055	0.0220112	0.145829	0.94565	0.224302	0.903519	0.147851	0.78348	0.0069799	0.730648	0.984397	0.0346008	0.407519	0.0403705	4	18	0.222222
HDAC9	205659_at				0.0045216	0.878849	0.777422	0.456545	0.120217	0.299111	0.208111	0.719493	0.654352	0.639943	0.399763	0.218441	0.000529919	0.0368891	0.0256125	0.478577	0.691149	0.259862	4	18	0.222222
FMO1	205666_at				0.0146144	0.287281	0.244634	0.0137879	0.61551	0.346903	0.440717	0.947111	0.580399	0.363343	0.481246	0.962183	0.474838	0.929945	0.847462	0.0447561	0.334359	0.0368329	4	18	0.222222
DLEU1	205677_s_at				0.0414914	0.7323	0.0455471	0.862365	0.0111941	0.213264	0.920611	0.621113	0.833648	0.0357415	0.318817	0.50396	0.0726795	0.901497	0.0935297	0.991772	0.629922	0.466571	4	18	0.222222
TNNT3	205693_at				0.394265	0.0649006	0.24784	0.382858	0.212063	0.0286205	0.824912	0.848984	0.0050481	0.316643	0.0864621	0.952313	0.394139	0.00250824	0.00813494	0.272854	0.848463	0.358793	4	18	0.222222
PHTF1	205702_at				0.0134782	0.484198	0.128103	0.285141	0.0337447	0.800915	0.929072	0.832307	0.0427084	0.828946	0.864263	0.00428739	0.665169	0.144563	0.21065	0.823297	0.865581	0.101156	4	18	0.222222
BLM	205733_at				0.00323934	0.518983	0.116894	0.73804	0.73011	0.0112911	0.013752	0.762874	0.224754	0.320887	0.621935	0.517332	0.67685	0.324891	0.295884	0.00156416	0.979721	0.128572	4	18	0.222222
FABP3	205738_s_at				0.570797	0.85274	0.083347	0.0222534	0.530554	0.710997	0.154499	0.271504	0.358415	0.621693	0.0237185	0.0238646	0.575142	0.286107	0.504217	0.0259728	0.24098	0.582039	4	18	0.222222
DDX18	205763_s_at				0.230687	0.546891	0.906399	0.120049	0.360957	0.0393928	0.804451	0.793863	0.842402	0.0355903	0.652878	0.286767	0.0307643	0.625642	0.727082	0.0133119	0.674216	0.113341	4	18	0.222222
CPEB3	205773_at				0.831357	0.288678	0.75332	0.537985	0.0208815	0.976076	0.293612	0.950241	0.492435	0.764769	0.567905	0.312764	0.00196853	0.0574071	0.0159873	0.14918	0.108896	0.017448	4	18	0.222222
ITGAM	205786_s_at				0.587121	0.37706	0.447376	0.958668	0.183889	0.0207021	0.233952	0.0767589	0.272989	0.0939416	0.55464	0.428982	0.120485	0.503984	0.918545	0.00756662	0.0219998	0.000641008	4	18	0.222222
IL7R	205798_at				0.0691757	0.507101	0.236965	0.523325	0.0574561	0.102293	0.0249937	0.870089	0.123529	0.00373413	0.468817	0.047947	0.0812713	0.214209	0.493701	0.0104324	0.0516845	0.600148	4	18	0.222222
TRPC1	205803_s_at				0.943768	0.762542	0.00883912	0.146743	0.394025	0.00283537	0.305126	0.567505	0.789125	0.497463	0.712452	0.582625	0.00668073	0.82395	0.969157	0.0425467	0.601023	0.517533	4	18	0.222222
TMED9	205812_s_at				1.07e-06	0.533841	0.532357	0.298722	0.753086	0.469515	0.934075	0.638703	0.188388	0.614276	0.0320101	0.180482	0.0303837	0.710519	0.900779	0.409035	0.00755826	0.180483	4	18	0.222222
MARCO	205819_at				0.240284	0.532728	0.0671521	0.556788	0.419873	0.116906	0.86935	0.88676	0.400724	0.23471	0.63693	0.216057	0.0459876	0.238899	0.347031	0.0111014	0.00619792	0.00983035	4	18	0.222222
CD2	205831_at				0.26878	0.0430795	0.52342	0.95655	0.0926635	0.0454557	0.0176264	0.238469	0.454042	0.0514193	0.753834	0.157241	0.208519	0.830623	0.485728	0.00217457	0.0967371	0.120637	4	18	0.222222
YTHDC2	205835_s_at				0.0190711	0.554752	0.216087	0.844764	0.369296	0.197659	0.718812	0.500832	0.00637427	0.0189154	0.0670688	0.123727	0.390478	0.143143	0.582419	0.0208926	0.829122	0.420409	4	18	0.222222
UQCRB	205849_s_at				0.000208062	0.600374	0.098686	0.6951	0.388438	0.0357123	0.413993	0.822492	0.135016	0.490799	0.0190563	0.146324	0.00223212	0.505169	0.20856	0.182325	0.0952143	0.371472	4	18	0.222222
SLC14A1	205856_at				0.361324	0.103714	0.75033	0.429625	0.809201	0.0569857	0.441478	0.0722501	0.00743938	0.189095	0.0105659	0.387022	0.5373	0.0861468	0.0308918	0.0286757	0.356162	0.211639	4	18	0.222222
SLC18A2	205857_at				0.150064	0.305303	0.553873	0.0749682	0.0243706	0.643114	0.829568	0.0892709	0.206375	0.479375	0.681877	0.532823	0.480627	0.104428	0.208428	0.0264836	0.0297087	0.00677096	4	18	0.222222
ZBTB16	205883_at				0.0107929	0.203508	0.129389	0.333412	0.826883	0.00236007	0.103364	0.00932079	0.536132	0.0871092	0.999362	0.444353	0.841716	0.0451774	0.0981209	0.23309	0.728144	0.099302	4	18	0.222222
ITGA4	205885_s_at				0.647219	0.0493767	0.272888	0.514909	0.766259	0.185671	0.00477488	0.15891	0.533131	0.60999	0.73142	0.919168	0.827418	0.364611	0.867165	0.0459475	0.0473247	0.299192	4	18	0.222222
KCNN3	205903_s_at				0.271678	0.950301	0.0233054	0.0115674	0.0399953	0.235698	0.143295	0.10437	0.926779	0.690049	0.902514	0.95164	0.513549	0.151328	0.309868	0.00802036	0.212827	0.249908	4	18	0.222222
OMD	205908_s_at				0.494103	0.54202	0.0563138	0.0740256	0.904749	0.0631055	0.925343	0.312227	0.34019	0.0601387	0.105284	0.0201492	0.618055	0.901332	0.480101	0.0206106	0.0413212	0.00861225	4	18	0.222222
PLIN1	205913_at				0.0384332	0.131805	0.0571382	0.865515	0.617591	0.460511	0.883036	0.948607	0.0160091	0.951598	0.0192046	0.776594	0.468461	0.987432	0.341571	0.0241799	0.194105	0.919867	4	18	0.222222
[truncated: 37,886 more rows]

## Sheet: T2DM_p-value_after_adjusting
Gene	Affymetrix probe-ID	GDS3681	GDS3715(1)	GDS3715(2)	GSE9006	GSE13760	GSE15653	GSE15773omental	GSE15773subcutaneous	GSE15932	GSE18732T2DM_IGT	GSE18732T2DM_nomal	GSE19420IGT0	GSE19420IGT52	GSE19420NGT0	GSE19420NGT52	GSE23343	GSE25462FN	GSE25462FP	GSE25724	GSE26637fastingIR	GSE26637hy	p<=0.05	count	percentages
SAFB2	32099_at	0.99955	0.00609172	9.59e-07	0.000565489	0.998738	0.495473	0.963306	0.958996	0.669938	0.95682	0.998368	0.726285	0.999667	0.715119	0.999692	0.768675	0.894593	0.890164	0.507824	0.960896	0.791991	3	21	0.142857
RPL11	200010_at				0.013991	0.99496	0.770963	0.963306	0.866092	0.633623	0.948491	0.998368	0.84027	0.999667	0.921714	0.999692	0.567658	0.955358	0.817835	0.0337492	0.975904	0.7588	2	18	0.111111
DDX5	200033_at				0.0494484	0.99496	0.495473	0.963306	0.928928	0.859333	0.945197	0.998368	0.810971	0.999667	0.683342	0.999692	0.693522	0.983	0.967295	0.0351834	0.914171	0.854707	2	18	0.111111
ERH	200043_at				0.00938745	0.995111	0.495473	0.982718	0.945042	0.529793	0.972093	0.998368	0.750724	0.999667	0.828145	0.999692	0.815832	0.862824	0.819667	0.0288368	0.98007	0.973139	2	18	0.111111
SRSF9	200044_at				0.00109981	0.99496	0.556054	0.970758	0.836008	0.985274	0.92912	0.998368	0.641705	0.999667	0.672392	0.999692	0.760321	0.766507	0.705375	0.0431097	0.824302	0.576088	2	18	0.111111
RPL14	200074_s_at				0.0489266	0.999567	0.56881	0.963306	0.915282	0.674215	0.954251	0.998368	0.787372	0.999667	0.681515	0.999692	0.559026	0.928106	0.82532	0.0336932	0.960711	0.730412	2	18	0.111111
TMED2	200087_s_at				0.0470908	0.99496	0.974939	0.978862	0.928994	0.407848	0.905293	0.999559	0.450533	0.999667	0.61257	0.999692	0.519149	0.872261	0.909602	0.0300308	0.710824	0.580659	2	18	0.111111
AC011737.2	200088_x_at				0.0326506	0.999545	0.495473	0.963306	0.799898	0.533554	0.97129	0.998368	0.664423	0.999667	0.655174	0.999692	0.990068	0.966331	0.876239	0.0330004	0.99108	0.737694	2	18	0.111111
CIRBP	200811_at				0.0048577	0.999567	0.495473	0.9645	0.965194	0.46635	0.93018	0.998368	0.707453	0.999667	0.66069	0.999692	0.96989	0.74758	0.753147	0.0319903	0.944542	0.933591	2	18	0.111111
PAFAH1B1	200816_s_at				0.0209087	0.999545	0.501576	0.996875	0.800178	0.388237	0.996198	0.998368	0.963051	0.999667	0.627138	0.999692	0.522829	0.841466	0.820221	0.0334235	0.951543	0.473888	2	18	0.111111
NCOR1	200855_at				2.8e-05	0.99496	0.495473	0.963306	0.810326	0.995113	0.85668	0.998368	0.773742	0.999667	0.756774	0.999692	0.932324	0.972556	0.956341	0.0347968	0.965091	0.569241	2	18	0.111111
STRAP	200870_at				0.00645329	0.99496	0.714915	0.963306	0.83333	0.679809	0.98704	0.998368	0.981436	0.999667	0.734853	0.999692	0.482733	0.733776	0.725144	0.0416722	0.919695	0.950177	2	18	0.111111
AHCY	200903_s_at				0.0263078	0.999567	0.744865	0.963306	0.799898	0.747736	0.988022	0.998368	0.873909	0.999667	0.946665	0.999706	0.878366	0.865774	0.714307	0.0288368	0.763745	0.187705	2	18	0.111111
GLUD1	200947_s_at				0.0234421	0.99496	0.495473	0.967061	0.972542	0.756944	0.832404	0.998368	0.899162	0.999667	0.806187	0.999692	0.796457	0.790922	0.897526	0.0416497	0.948555	0.456906	2	18	0.111111
PPIB	200967_at				0.00345126	0.99496	0.543849	0.997119	0.799898	0.891251	0.960876	0.998368	0.45954	0.999667	0.578415	0.999692	0.823456	0.955414	0.970466	0.0420683	0.956653	0.947876	2	18	0.111111
PPIB	200968_s_at				0.0243626	0.99496	0.542404	0.965289	0.799898	0.950175	0.966743	0.998368	0.693941	0.999667	0.65157	0.999692	0.971337	0.982857	0.968041	0.047745	0.956445	0.692813	2	18	0.111111
MDH1	200978_at				0.0462684	0.99496	0.495473	0.965289	0.996583	0.238849	0.953422	0.998368	0.713911	0.999667	0.955685	0.999692	0.719382	0.714846	0.642156	0.0484515	0.998291	0.9739	2	18	0.111111
EIF1AX	201017_at				0.0306327	0.99496	0.495473	0.963306	0.799898	0.124032	0.971216	0.998368	0.914446	0.999667	0.957521	0.999692	0.648616	0.80823	0.827765	0.0337492	0.922703	0.288888	2	18	0.111111
BLCAP	201032_at				0.0359078	0.999567	0.899996	0.988181	0.802457	0.875784	0.925129	0.998368	0.855994	0.999667	0.643327	0.999692	0.986493	0.957231	0.951313	0.0323135	0.902097	0.531194	2	18	0.111111
CYC1	201066_at				0.00345126	0.997734	0.495473	0.963306	0.955816	0.613073	0.926884	0.998368	0.944113	0.999667	0.85152	0.999692	0.787289	0.756474	0.851975	0.0321202	0.956645	0.696386	2	18	0.111111
PSMC2	201068_s_at				0.0454135	0.99496	0.495473	0.963306	0.799898	0.263272	0.969588	0.998368	0.939593	0.999667	0.800014	0.999692	0.565953	0.892741	0.866482	0.0373503	0.686588	0.911772	2	18	0.111111
NHP2L1	201077_s_at				0.0485706	0.99496	0.495473	0.97384	0.881116	0.616169	0.974919	0.998368	0.770618	0.999667	0.954062	0.999692	0.985349	0.958262	0.892883	0.0349424	0.982667	0.509887	2	18	0.111111
SON	201086_x_at				0.000541028	0.999545	0.792973	0.963306	0.799898	0.223347	0.962723	0.998368	0.669307	0.999667	0.948722	0.999692	0.56092	0.933322	0.823616	0.0356777	0.955878	0.863611	2	18	0.111111
COPB2	201098_at				0.0251231	0.99496	0.495473	0.963306	0.961524	0.603967	0.966805	0.998368	0.902435	0.999667	0.830842	0.999692	0.718331	0.972164	0.804714	0.0356829	0.827601	0.645479	2	18	0.111111
EIF5A	201123_s_at				0.0432978	0.999545	0.89906	0.963728	0.886754	0.978686	0.689728	0.998368	0.843604	0.999667	0.772082	0.999692	0.963246	0.917237	0.843183	0.0398503	0.953536	0.733671	2	18	0.111111
MFN2	201155_s_at				0.0325227	0.99496	0.520363	0.986357	0.834516	0.524912	0.942386	0.998368	0.931811	0.999667	0.622051	0.999692	0.872499	0.975164	0.960202	0.0380236	0.973624	0.89006	2	18	0.111111
PITPNA	201190_s_at				0.0419549	0.997734	0.554533	0.963306	0.970083	0.84208	0.964236	0.998368	0.992202	0.999667	0.892426	0.999692	0.812536	0.928699	0.931334	0.0442347	0.953976	0.893866	2	18	0.111111
PSMD1	201198_s_at				0.0229513	0.99496	0.701294	0.963728	0.954021	0.66946	0.92912	0.998368	0.889501	0.999667	0.733972	0.999692	0.378264	0.972832	0.746359	0.0395151	0.853494	0.214579	2	18	0.111111
DDX3X	201210_at				0.0244503	0.99496	0.60711	0.991095	0.799898	0.967843	0.954991	0.998368	0.845943	0.999667	0.709547	0.999692	0.773219	0.930432	0.925271	0.0421109	0.993647	0.61938	2	18	0.111111
SRRM1	201225_s_at				0.00165098	0.99496	0.495473	0.971951	0.799898	0.318459	0.905293	0.999559	0.629382	0.999667	0.843418	0.999692	0.878366	0.964598	0.844095	0.0305374	0.969656	0.734559	2	18	0.111111
[truncated: 39,855 more rows]
