# Supplementary material for: Identifying Candidate Genes for Type 2 Diabetes Mellitus and Obesity through Gene Expression Profiling in Multiple Tissues or Cells
Source: J Diabetes Res. 2013 Dec 26;2013:970435. doi: 10.1155/2013/970435 (PMC3888709; doi:10.1155/2013/970435)
Supplement: Supplementary file 7 [file 970435.f7.xls]

## Sheet: supplementary_material7
Up- and down- expression of candidate genes in T2DM-control study
GSE		GDS3681	GDS3715(1)	GDS3715(2)	GSE18732(1)	GSE18732(2)	GSE19420(1)	GSE19420(2)	GSE19420(3)	GSE19420(4)	GSE25462(1)	GSE25462(2)	GSE25724	GSE15773(1)	GSE15773(2)	GSE26637(1)	GSE26637(2)	GSE15653	GSE23343	GSE9006	GSE13760	GSE15932
Group		group1	group2	group3	group4	group5	group6	group7	group8	group9	group10	group11	group12	group13	group14	group15	group16	group17	group18	group19	group20	group21
GPL		HG_U95Av2	HG_U95A	HG_U95A	HG-U133_Plus_2	HG-U133_Plus_2	HG-U133_Plus_2	HG-U133_Plus_2	HG-U133_Plus_2	HG-U133_Plus_2	HG-U133_Plus_2	HG-U133_Plus_2	HG-U133A	HG-U133_Plus_2	HG-U133_Plus_2	HG-U133_Plus_2	HG-U133_Plus_2	HG-U133A	HG-U133_Plus_2	HG-U133A	HG-U133A_2	HG-U133_Plus_2
Tissue		myotube	skeletal muscle	skeletal muscle	skeletal muscle	skeletal muscle	skeletal muscle	skeletal muscle	skeletal muscle	skeletal muscle	skeletal muscle	skeletal muscle	islets	adipose tissue	adipose tissue	Adipose tissue	Adipose tissue	liver	liver	blood	arterial tissue	blood
gene	Affymetrix probe-ID
LYN	210754_s_at				0.0118182	0.414794	0.00440343	0.00153087	0.0323678	0.021204	0.0432253	0.102736	0.0308968	0.0616139	0.909692	0.0333857	0.0169914	0.218265	0.045409	0.0622443	0.386576	0.0459893
C2orf15	243887_at				0.137897	0.945579	0.00242569	0.0693391	0.0420688	0.269447	0.00326274	0.00727981		0.149153	0.0208804	0.834511	0.183605		0.0235657			0.0072856
DENND1B	219696_at				0.908576	0.358278	0.00094604	0.0393458	0.18615	0.551182	0.128984	0.0230525	0.0129327	0.640987	0.553969	0.095344	0.0456702	0.961546	0.0377777	0.0419186	0.0282795	0.00355447
MRPL30	243887_at				0.137897	0.945579	0.00242569	0.0693391	0.0420688	0.269447	0.00326274	0.00727981		0.149153	0.0208804	0.834511	0.183605		0.0235657			0.0072856
POC1B	226283_at				0.113271	0.569822	0.989651	0.911293	up0.025913508	0.0292528	0.007692	0.0201726		0.39123	0.101305	0.463446	0.0418733		0.008954			0.00796272
PRKCB	209685_s_at				0.0384209	0.0130235	0.00749519	0.0226373	0.350134	0.17859	0.560165	0.278635	0.00956217	0.341135	0.65734	0.0482384	0.00231767	0.772213	0.00247336	0.0140938	0.932206	0.17495
RP4-655J12.3	244606_at				0.0283817	0.409263	0.0062713	0.218091	0.0130024	0.215849	0.0417299	0.0959885		0.0560974	0.395228	0.816647	0.0489194		0.00728102			0.0244385
HIBADH	224812_at				0.000870215	0.900221	0.0483904	0.0391915	0.493221	0.868188	0.0430189	0.0151073		0.237143	0.411445	0.797598	0.912509		0.294891			0.0115463
TMBIM4	223892_s_at				0.722731	0.303354	0.0132348	0.0134416	0.0449261	0.0239732	0.0112996	0.085198		0.428379	0.415853	0.507827	0.200031		0.0258184			0.801655
Note: T2DM vs normal,green stands down-expression;yellow stands up-expression.
Up- and down- expression of candidate genes in obesity-control study
GSE				GSE474(1)	GSE474（2）	GSE9624	GSE10946	GSE15653	GSE18897（1）	GSE18897（2）	GSE29718（1）	GSE28005	GSE2508（1）	GSE2508（2）	GSE25401	GSE29718（2）	GSE29718（3）
Group				group1	group2	group3	group4	group5	group6	group7	group8	group9	group10	group11	group12	group13	group14
GPL				HG-U133A	HG-U133A	HG-U133_Plus_2	HG-U133_Plus_2	HG-U133_Plus_2	HG-U133_Plus_2	HG-U133_Plus_2	HuGene-1_0-st	HG-U133_Plus_2	HG_95B	HG_95B	HuGene-1_0-st	HuGene-1_0-st	HuGene-1_0-st
Tissue				skeletal muscle	skeletal muscle	omental adipose tissue	cumulus cells	liver	blood	blood	visceral tissue	subcutaneous adipose tissue	subcutaneous adipose tissue	subcutaneous adipose tissue	subcutaneous adipose tissue	subcutaneous adipose tissue	subcutaneous adipose tissue
Genes	Affymetrix probe-ID
BCAT1	225285_at	54904_at	7961829			0.0194496	0.843282		0.0104518	0.000189122	0.956881	0.00200237	4.59186e-05	0.0204916	8.21e-06	0.553598	0.822523
BMP2K	226853_at	59644_at	8096004			0.239149	0.134586		0.000842198	6.78869e-05	0.363084	0.00649104	0.0038143	0.0313966	2.64e-07	0.031497	0.317054
CSRNP2	221260_s_at		7963235	0.0496759	0.0364594	0.912817	0.570509	0.0405017	0.0391763	0.0166757		0.0487716			0.0267586	0.797003	0.917896
MYNN	224206_x_at	56327_at	8083794			0.636436	0.0456954		0.000331241	0.00256896	0.451306	0.0400584	0.383351	0.000637321	0.0356134	0.00878193	0.96153
NCKAP5L	231865_at	59196_at	7963134			0.257391	0.0401632		0.0215974	0.0372287	0.548673	0.0263568	0.0305489	0.0292152	0.0172539	0.576093	0.588512
SAP30BP	222475_at	57478_at	8009932			0.00805073	0.49385		0.00862438	0.00106936	0.796352	0.0275444	0.0338373	0.0484953	0.019255	0.155206	0.899521
SLC35B4	238418_at	54813_at	8143040			0.0391355	0.351376		0.0124141	0.0177239	0.394768	0.000538736	0.0314386	0.000192111	0.000622806	0.826095	0.151315
SP1	1553685_s_at	50335_at	7955787			0.0372085	0.726501		0.0182867	0.0225056	0.711437	0.0373867	0.000986852	0.000326361	0.000188327	0.33825	0.875767
ITGA5	201389_at		7963786	0.00595025	0.0403141	0.287703	0.868871	0.00303785	0.00793003	0.0280292	0.266565	0.00579841			1.11e-05	0.713655	0.866864
TOMM5	228053_s_at	56416_at				0.0815734	0.227662		0.000195404	0.00267091		0.0495807	0.04899	0.623143
HSP90AB1	1557910_at		7895585			0.0403527	0.276284		0.0196184	2.15754e-05	0.0325026	0.240533			0.000385893	0.0662199	0.539878
BAP1	1555735_a_at		8087885			0.00611088	0.032415		0.0440917	0.0229178		0.0638565			0.602247	0.717398	0.797497
GRB14	206204_at		8056327	0.0305544	0.000446455	0.0109335	0.161632	0.0478775	0.368196	0.741599	0.493152	0.0134373			0.045048	0.541424	0.695083
Note: obesity vs normal,green stands down-expression;yellow stands up-expression.
